# Supplementary material for: Targeted Library of Phosphonic-Type Inhibitors of Human Neutrophil Elastase
Source: MDPI journal article supplement (doi:10.3390/molecules29051120), 2024-03-01

# **Targeted library of phosphonic-type inhibitors of human neutrophil elastase**

**Karolina Torzyk-Jurowska<sup>1</sup>, Jarosław Ciekot<sup>2</sup>, Łukasz Winiarski<sup>1,\*</sup>**

<sup>1</sup> Division of Organic and Medicinal Chemistry, Faculty of Chemistry, Wrocław University of Science and Technology, Wybrzeże Wyspiańskiego 27, 50-370 Wrocław, Poland.;

<sup>2</sup> Department of Experimental Oncology, Hirsfeld Institute of Immunology and Experimental Therapy, Polish Academy of Sciences, 53-114 Wrocław, Poland;

\* Correspondence: lukasz.winiarski@pwr.edu.pl;

|                                                                                                      |    |
|------------------------------------------------------------------------------------------------------|----|
| Amino Acid Structures .....                                                                          | 5  |
| (1) Boc-L-Val-Gly-Val <sup>P</sup> (OPh-4-SCH <sub>3</sub> ) <sub>2</sub> .....                      | 9  |
| (2) Boc-L-Val-L-Ala-Val <sup>P</sup> (OPh-4-SCH <sub>3</sub> ) <sub>2</sub> .....                    | 11 |
| (3) Boc-L-Val-D-Ala-Val <sup>P</sup> (OPh-4-SCH <sub>3</sub> ) <sub>2</sub> .....                    | 13 |
| (4) Boc-L-Val-Aib-Val <sup>P</sup> (OPh-4-SCH <sub>3</sub> ) <sub>2</sub> .....                      | 15 |
| (5) Boc-L-Val-beta-Ala-Val <sup>P</sup> (OPh-4-SCH <sub>3</sub> ) <sub>2</sub> .....                 | 17 |
| (6) Boc-L-Val-L-Abu-Val <sup>P</sup> (OPh-4-SCH <sub>3</sub> ) <sub>2</sub> .....                    | 19 |
| (7) Boc-L-Val-D-Abu- Val <sup>P</sup> (OPh-4-SCH <sub>3</sub> ) <sub>2</sub> .....                   | 21 |
| (8) Boc-L-Val-L-Nva- Val <sup>P</sup> (OPh-4-SCH <sub>3</sub> ) <sub>2</sub> .....                   | 23 |
| (9) Boc-L-Val-D-Nva- Val <sup>P</sup> (OPh-4-SCH <sub>3</sub> ) <sub>2</sub> .....                   | 25 |
| (10) Boc-L-Val-L-Val-Val <sup>P</sup> (OPh-4-SCH <sub>3</sub> ) <sub>2</sub> .....                   | 27 |
| (11) Boc-L-Val-D-Val- Val <sup>P</sup> (OPh-4-SCH <sub>3</sub> ) <sub>2</sub> .....                  | 29 |
| (12) Boc-L-Val-L-Tle- Val <sup>P</sup> (OPh-4-SCH <sub>3</sub> ) <sub>2</sub> .....                  | 31 |
| (13) Boc-L-Val-D-Tle- Val <sup>P</sup> (OPh-4-SCH <sub>3</sub> ) <sub>2</sub> .....                  | 33 |
| (14) Boc-L-Val-L-Nle- Val <sup>P</sup> (OPh-4-SCH <sub>3</sub> ) <sub>2</sub> .....                  | 35 |
| (15) Boc-L-Val-D-Nle- Val <sup>P</sup> (OPh-4-SCH <sub>3</sub> ) <sub>2</sub> .....                  | 37 |
| (16) Boc-L-Val-L-Leu-Val <sup>P</sup> (OPh-4-SCH <sub>3</sub> ) <sub>2</sub> .....                   | 39 |
| (17) Boc-L-Val-D-Leu-Val <sup>P</sup> (OPh-4-SCH <sub>3</sub> ) <sub>2</sub> .....                   | 41 |
| (18) Boc-L-Val-L-NptGly-Val <sup>P</sup> (OPh-4-SCH <sub>3</sub> ) <sub>2</sub> .....                | 43 |
| (19) Boc-L-Val-L-Met-Val <sup>P</sup> (OPh-4-SCH <sub>3</sub> ) <sub>2</sub> .....                   | 45 |
| (20) Boc-L-Val-D-Met-Val <sup>P</sup> (OPh-4-SCH <sub>3</sub> ) <sub>2</sub> .....                   | 47 |
| (21) Boc-L-Val-L-Met(O)- Val <sup>P</sup> (OPh-4-SCH <sub>3</sub> ) <sub>2</sub> .....               | 49 |
| (22) Boc-L-Val-L-Met(O <sub>2</sub> )- Val <sup>P</sup> (OPh-4-SCH <sub>3</sub> ) <sub>2</sub> ..... | 51 |
| (23) Boc-L-Val-L-Ser(Bzl)-Val <sup>P</sup> (OPh-4-SCH <sub>3</sub> ) <sub>2</sub> .....              | 53 |
| (24) Boc-L-Val-D-Ser(Bzl)-Val <sup>P</sup> (OPh-4-SCH <sub>3</sub> ) <sub>2</sub> .....              | 55 |
| (25) Boc-L-Val-L-Thr(Bzl)-Val <sup>P</sup> (OPh-4-SCH <sub>3</sub> ) <sub>2</sub> .....              | 57 |
| (26) Boc-L-Val-D-Thr(Bzl)- Val <sup>P</sup> (OPh-4-SCH <sub>3</sub> ) <sub>2</sub> .....             | 59 |
| (27) Boc-L-Val-L-Pro-Val <sup>P</sup> (OPh-4-SCH <sub>3</sub> ) <sub>2</sub> .....                   | 61 |
| (28) Boc-L-Val-D-Pro-Val <sup>P</sup> (OPh-4-SCH <sub>3</sub> ) <sub>2</sub> .....                   | 62 |
| (29) Boc-L-Val-L-Oic-Val <sup>P</sup> (OPh-4-SCH <sub>3</sub> ) <sub>2</sub> .....                   | 64 |
| (30) Boc-L-Val-L-Pip-Val <sup>P</sup> (OPh-4-SCH <sub>3</sub> ) <sub>2</sub> .....                   | 66 |
| (31) Boc-L-Val-D-Pip-Val <sup>P</sup> (OPh-4-SCH <sub>3</sub> ) <sub>2</sub> .....                   | 68 |
| (32) Boc-L-Val-L-Tic-Val <sup>P</sup> (OPh-4-SCH <sub>3</sub> ) <sub>2</sub> .....                   | 70 |
| (33) Boc-L-Val-D-Tic- Val <sup>P</sup> (OPh-4-SCH <sub>3</sub> ) <sub>2</sub> .....                  | 72 |
| (34) Boc-L-Val-L-Nip-Val <sup>P</sup> (OPh-4-SCH <sub>3</sub> ) <sub>2</sub> .....                   | 74 |
| (35) Boc-L-Val-L-Cpg-Val <sup>P</sup> (OPh-4-SCH <sub>3</sub> ) <sub>2</sub> .....                   | 76 |
| (36) 344.2 Boc-L-Val-L-Chg-Val <sup>P</sup> (OPh-4-SCH <sub>3</sub> ) <sub>2</sub> .....             | 78 |
| (37) Boc-L-Val-D-Chg-Val <sup>P</sup> (OPh-4-SCH <sub>3</sub> ) <sub>2</sub> .....                   | 80 |

|                                                                                               |     |
|-----------------------------------------------------------------------------------------------|-----|
| (38) Boc-L-Val-L-Phe- Val <sup>P</sup> (OPh-4-SCH <sub>3</sub> ) <sub>2</sub> .....           | 82  |
| (39) Boc-L-Val-D-Phe-Val <sup>P</sup> (OPh-4-SCH <sub>3</sub> ) <sub>2</sub> .....            | 84  |
| (40) Boc-L-Val-L-Cha- Val <sup>P</sup> (OPh-4-SCH <sub>3</sub> ) <sub>2</sub> .....           | 86  |
| (41) Boc-L-Val-D-Igl-Val <sup>P</sup> (OPh-4-SCH <sub>3</sub> ) <sub>2</sub> .....            | 88  |
| (42) Boc-L-Val-D-Igl-Val <sup>P</sup> (OPh-4-SCH <sub>3</sub> ) <sub>2</sub> .....            | 90  |
| (43) Boc-L-Val-L-Trp- Val <sup>P</sup> (OPh-4-SCH <sub>3</sub> ) <sub>2</sub> .....           | 92  |
| (44) Boc-L-Val-D-Trp-Val <sup>P</sup> (OPh-4-SCH <sub>3</sub> ) <sub>2</sub> .....            | 94  |
| (45) Boc-L-Val-L-Asp(Bzl)-Val <sup>P</sup> (OPh-4-SCH <sub>3</sub> ) <sub>2</sub> .....       | 96  |
| (46) Boc-L-Val-D-Asp(Bzl)-Val <sup>P</sup> (OPh-4-SCH <sub>3</sub> ) <sub>2</sub> .....       | 98  |
| (47) Boc-L-Val-L-Cys(Bzl)-Val <sup>P</sup> (OPh-4-SCH <sub>3</sub> ) <sub>2</sub> .....       | 100 |
| (48) Boc-L-Val-L-Glu(Bzl)- Val <sup>P</sup> (OPh-4-SCH <sub>3</sub> ) <sub>2</sub> .....      | 102 |
| (49) Boc-L-Val-D-Orn(Z)-Val <sup>P</sup> (OPh-4-SCH <sub>3</sub> ) <sub>2</sub> .....         | 104 |
| (50) Boc-L-Val-D-Tyr(Bzl)- Val <sup>P</sup> (OPh-4-SCH <sub>3</sub> ) <sub>2</sub> .....      | 106 |
| (51) Boc-L-Val-L-Tyr(Bzl)-Val <sup>P</sup> (OPh-4-SCH <sub>3</sub> ) <sub>2</sub> .....       | 108 |
| (52) Boc-L-Val-L-Lys(Z)-Val <sup>P</sup> (OPh-4-SCH <sub>3</sub> ) <sub>2</sub> .....         | 110 |
| (53) Boc-L-Val-D-Lys(Z)-Val <sup>P</sup> (OPh-4-SCH <sub>3</sub> ) <sub>2</sub> .....         | 112 |
| (54) 353.2 Boc-L-Val-L-Hyp(Bzl)-Val <sup>P</sup> (OPh-4-SCH <sub>3</sub> ) <sub>2</sub> ..... | 114 |
| (55) Boc-Gly-L-Pro-Val <sup>P</sup> (OPh-4-SCH <sub>3</sub> ) <sub>2</sub> .....              | 116 |
| (56) Boc-L-Ala-L-Pro-Val <sup>P</sup> (OPh-4-SCH <sub>3</sub> ) <sub>2</sub> .....            | 118 |
| (57) Boc-D-Ala-L-Pro-Val <sup>P</sup> (OPh-4-SCH <sub>3</sub> ) <sub>2</sub> .....            | 120 |
| (58) Boc-Aib-L-Pro- Val <sup>P</sup> (OPh-4-SCH <sub>3</sub> ) <sub>2</sub> .....             | 122 |
| (59) Boc-AC3C-L-Pro- Val <sup>P</sup> (OPh-4-SCH <sub>3</sub> ) <sub>2</sub> .....            | 124 |
| (60) Boc-beta-Ala-L-Pro- Val <sup>P</sup> (OPh-4-SCH <sub>3</sub> ) <sub>2</sub> .....        | 126 |
| (61) Boc-GABA-L-Pro-Val <sup>P</sup> (OPh-4-SCH <sub>3</sub> ) <sub>2</sub> .....             | 128 |
| (62) Boc-L-Abu-L-Pro-Val <sup>P</sup> (OPh-4-SCH <sub>3</sub> ) <sub>2</sub> .....            | 130 |
| (63) Boc-D-Abu-L-Pro-Val <sup>P</sup> (OPh-4-SCH <sub>3</sub> ) <sub>2</sub> .....            | 132 |
| (64) Boc-AC4C-L-Pro-Val <sup>P</sup> (OPh-4-SCH <sub>3</sub> ) <sub>2</sub> .....             | 134 |
| (65) Boc-L-Nva-L-Pro- Val <sup>P</sup> (OPh-4-SCH <sub>3</sub> ) <sub>2</sub> .....           | 136 |
| (66) Boc-D-Nva-L-Pro-Val <sup>P</sup> (OPh-4-SCH <sub>3</sub> ) <sub>2</sub> .....            | 138 |
| (67) Boc-D-Val-L-Pro-Val <sup>P</sup> (OPh-4-SCH <sub>3</sub> ) <sub>2</sub> .....            | 140 |
| (68) Boc-L-Tle-L-Pro-Val <sup>P</sup> (OPh-4-SCH <sub>3</sub> ) <sub>2</sub> .....            | 142 |
| (69) Boc-D-Tle-L-Pro- Val <sup>P</sup> (OPh-4-SCH <sub>3</sub> ) <sub>2</sub> .....           | 144 |
| (70) Boc-L-Nle-L-Pro-Val <sup>P</sup> (OPh-4-SCH <sub>3</sub> ) <sub>2</sub> .....            | 146 |
| (71) Boc-D-Nle-L-Pro-Val <sup>P</sup> (OPh-4-SCH <sub>3</sub> ) <sub>2</sub> .....            | 148 |
| (72) Boc-L-Leu-L-Pro- Val <sup>P</sup> (OPh-4-SCH <sub>3</sub> ) <sub>2</sub> .....           | 150 |
| (73) Boc-D-Leu-L-Pro-Val <sup>P</sup> (OPh-4-SCH <sub>3</sub> ) <sub>2</sub> .....            | 152 |
| (74) Boc-L-NptGly-L-Pro-Val <sup>P</sup> (OPh-4-SCH <sub>3</sub> ) <sub>2</sub> .....         | 154 |
| (75) Boc-L-Met-L-Pro- Val <sup>P</sup> (OPh-4-SCH <sub>3</sub> ) <sub>2</sub> .....           | 156 |
| (76) Boc-D-Met-L-Pro-Val <sup>P</sup> (OPh-4-SCH <sub>3</sub> ) <sub>2</sub> .....            | 158 |

|                                                                                                       |     |
|-------------------------------------------------------------------------------------------------------|-----|
| (77) Boc-L-Met(O)-L-Pro-Val <sup>P</sup> (OPh-4-SCH <sub>3</sub> ) <sub>2</sub> .....                 | 160 |
| (78) Boc-L-Met(O) <sub>2</sub> -L-Pro- Val <sup>P</sup> (OPh-4-SCH <sub>3</sub> ) <sub>2</sub> .....  | 162 |
| (79) Boc-L-Gln-L-Pro-Val <sup>P</sup> (OPh-4-SCH <sub>3</sub> ) <sub>2</sub> .....                    | 164 |
| (80) Boc-D-Gln-L-Pro- Val <sup>P</sup> (OPh-4-SCH <sub>3</sub> ) <sub>2</sub> .....                   | 166 |
| (81) Boc-L-Pro-L-Pro-Val <sup>P</sup> (OPh-4-SCH <sub>3</sub> ) <sub>2</sub> .....                    | 168 |
| (82) Boc-L-Pip-L-Pro-Val <sup>P</sup> (OPh-4-SCH <sub>3</sub> ) <sub>2</sub> .....                    | 170 |
| (83) Boc-D-Pip-L-Pro- Val <sup>P</sup> (OPh-4-SCH <sub>3</sub> ) <sub>2</sub> .....                   | 172 |
| (84) Boc-L-Nip-L-Pro- Val <sup>P</sup> (OPh-4-SCH <sub>3</sub> ) <sub>2</sub> .....                   | 174 |
| (85) Boc-D-Nip-L-Pro- Val <sup>P</sup> (OPh-4-SCH <sub>3</sub> ) <sub>2</sub> .....                   | 176 |
| (86) Boc-1,4-cis-ACHC-L-Pro-Val <sup>P</sup> (OPh-4-SCH <sub>3</sub> ) <sub>2</sub> .....             | 178 |
| (87) Boc-1,4-trans-ACHC-L-Pro-Val <sup>P</sup> (OPh-4-SCH <sub>3</sub> ) <sub>2</sub> .....           | 180 |
| (88) Boc-L-Cpg-L-Pro-Val <sup>P</sup> (OPh-4-SCH <sub>3</sub> ) <sub>2</sub> .....                    | 182 |
| (89) Boc-L-Phg-L-Pro-Val <sup>P</sup> (OPh-4-SCH <sub>3</sub> ) <sub>2</sub> .....                    | 184 |
| (90) Boc-D-Phg-L-Pro- Val <sup>P</sup> (OPh-4-SCH <sub>3</sub> ) <sub>2</sub> .....                   | 186 |
| (91) Boc-L-Chg-L-Pro-Val <sup>P</sup> (OPh-4-SCH <sub>3</sub> ) <sub>2</sub> .....                    | 188 |
| (92) Boc-D-Chg-L-Pro-Val <sup>P</sup> (OPh-4-SCH <sub>3</sub> ) <sub>2</sub> .....                    | 190 |
| (93) Boc-L-Phe-L-Pro-Val <sup>P</sup> (OPh-4-SCH <sub>3</sub> ) <sub>2</sub> .....                    | 192 |
| (94) Boc-D-Phe-L-Pro- Val <sup>P</sup> (OPh-4-SCH <sub>3</sub> ) <sub>2</sub> .....                   | 194 |
| (95) Boc-L-Cha-L-Pro-Val <sup>P</sup> (OPh-4-SCH <sub>3</sub> ) <sub>2</sub> .....                    | 196 |
| (96) Boc-L-HPhe-L-Pro-Val <sup>P</sup> (OPh-4-SCH <sub>3</sub> ) <sub>2</sub> .....                   | 198 |
| (97) Boc-D-HPhe-L-Pro-Val <sup>P</sup> (OPh-4-SCH <sub>3</sub> ) <sub>2</sub> .....                   | 200 |
| (98) Boc-L-Igl-L-Pro-Val <sup>P</sup> (OPh-4-SCH <sub>3</sub> ) <sub>2</sub> .....                    | 202 |
| (99) Boc-D-Igl-L-Pro-Val <sup>P</sup> (OPh-4-SCH <sub>3</sub> ) <sub>2</sub> .....                    | 204 |
| (100) Boc-L-Thr(Bzl)-L-Pro- Val <sup>P</sup> (OPh-4-SCH <sub>3</sub> ) <sub>2</sub> .....             | 206 |
| (101) Boc-L-Cys(Bzl)-L-Pro- Val <sup>P</sup> (OPh-4-SCH <sub>3</sub> ) <sub>2</sub> .....             | 208 |
| (102) Boc-D-Cys(Bzl)-L-Pro-Val <sup>P</sup> (OPh-4-SCH <sub>3</sub> ) <sub>2</sub> .....              | 210 |
| (103) Boc-L-Asp(Bzl)-L-Pro- Val <sup>P</sup> (OPh-4-SCH <sub>3</sub> ) <sub>2</sub> .....             | 212 |
| (104) Boc-D-Asp(Bzl)-L-Pro- Val <sup>P</sup> (OPh-4-SCH <sub>3</sub> ) <sub>2</sub> .....             | 214 |
| (105) Boc-L-Glu(Bzl)-L-Pro- Val <sup>P</sup> (OPh-4-SCH <sub>3</sub> ) <sub>2</sub> .....             | 216 |
| (106) Boc-L-His(Bzl)-L-Pro-Val <sup>P</sup> (OPh-4-SCH <sub>3</sub> ) <sub>2</sub> .....              | 218 |
| (107) Boc-L-Orn(Z)-L-Pro-Val <sup>P</sup> (OPh-4-SCH <sub>3</sub> ) <sub>2</sub> .....                | 220 |
| (108) Boc-D-Orn(Z)-L-Pro-Val <sup>P</sup> (OPh-4-SCH <sub>3</sub> ) <sub>2</sub> .....                | 222 |
| (109) Boc-L-Lys(Z)-L-Pro-Val <sup>P</sup> (OPh-4-SCH <sub>3</sub> ) <sub>2</sub> .....                | 224 |
| (110) Boc-D-Lys(Z)-L-Pro-Val <sup>P</sup> (OPh-4-SCH <sub>3</sub> ) <sub>2</sub> .....                | 226 |
| (111) Hm-L-Met(O <sub>2</sub> )-L-Pro- Val <sup>P</sup> (OPh-4-SCH <sub>3</sub> ) <sub>2</sub> .....  | 228 |
| (112) Hm-L-Met(O <sub>2</sub> )-L-Pro-D-Val <sup>P</sup> (OPh-4-SCH <sub>3</sub> ) <sub>2</sub> ..... | 230 |
| (113) Hm-L-Met(O <sub>2</sub> )-L-Pro-L-Val <sup>P</sup> (OPh-4-SCH <sub>3</sub> ) <sub>2</sub> ..... | 232 |



## Amino Acid Structures

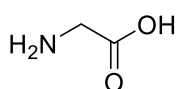

**Gly**  
**glycine**

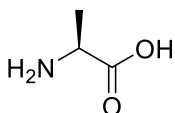

**L-Ala**  
**L-Alanine**

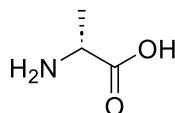

**D-Ala**  
**D-Alanine**

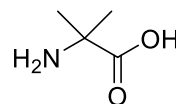

**Aib**  
**2-Aminoisobutyric acid**

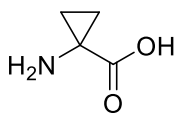

**AC3C**  
**1-Amino-1-cyclopropanecarboxylic acid**

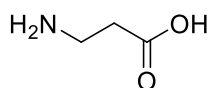

**beta-Ala**  
**beta Alanine**

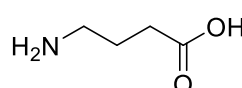

**GABA**  
**gamma-aminobutyric acid**

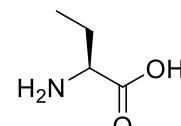

**L-Abu**  
**L-Aminobutyric acid**

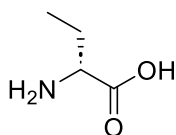

**D-Abu**  
**D-Aminobutyric acid**

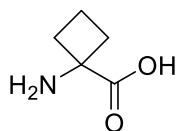

**AC4C**  
**1-cyclobutyl-1-carboxylic acid**

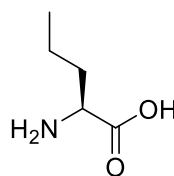

**L-Nva**  
**L-Norvaline**

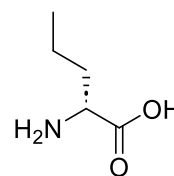

**D-Nva**  
**D-Norvaline**

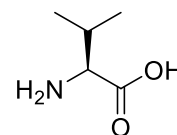

**L-Val**  
**L-Valine**

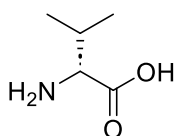

**D-Val**  
**D-Valine**

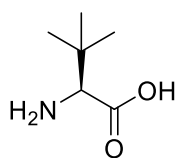

**L-Tle**  
**L-tert-Leucine**

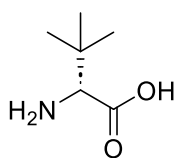

**D-Tle**  
**D-tert-Leucine**

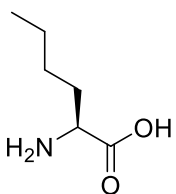

**L-Nle**  
**L-Norleucine**

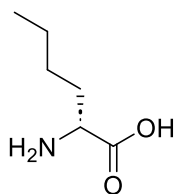

**D-Nle**  
**D-Norleucine**

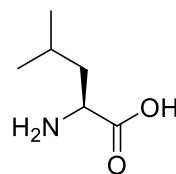

**L-Leu**  
**L-Leucine**

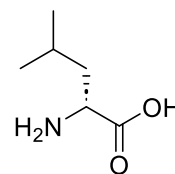

**D-Leu**  
**D-Leucine**

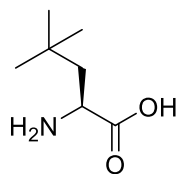

**L-NptGly**  
**L-Neopentylglycine**

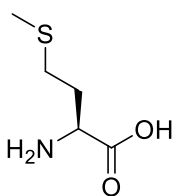

**L-Met**  
**L-Methionine**

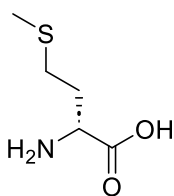

**D-Met**  
**D-Methionine**

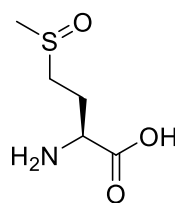

**L-Met(O)**  
**L-Methionine sulfoxide**

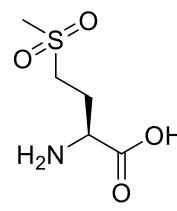

**L-Met(O)<sub>2</sub>**  
**L-Methionine sulfone**

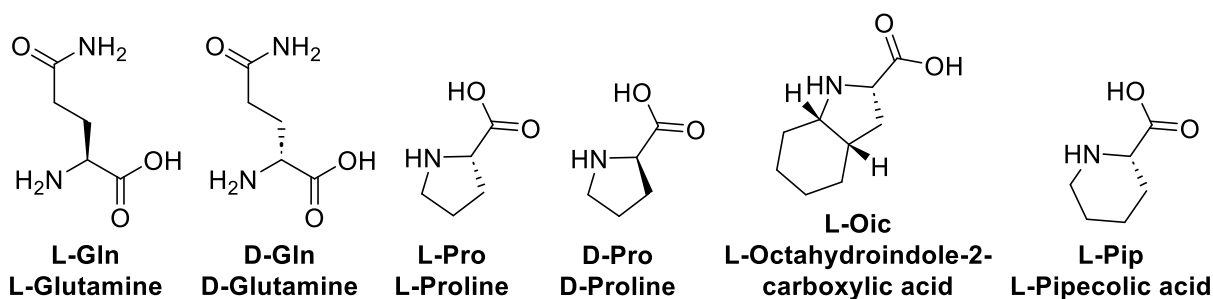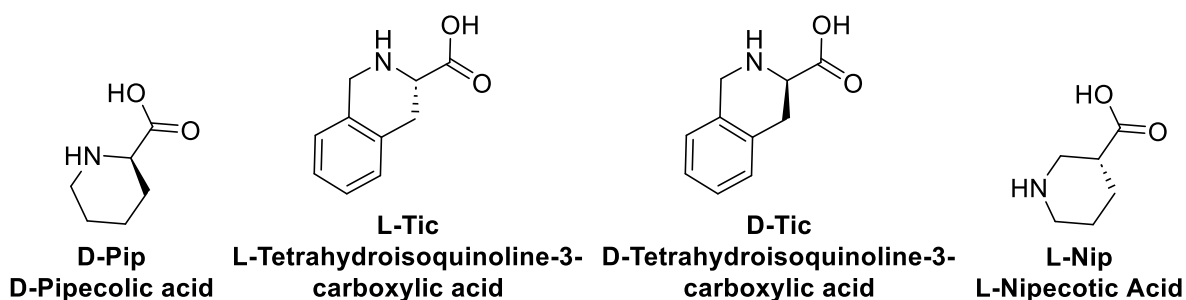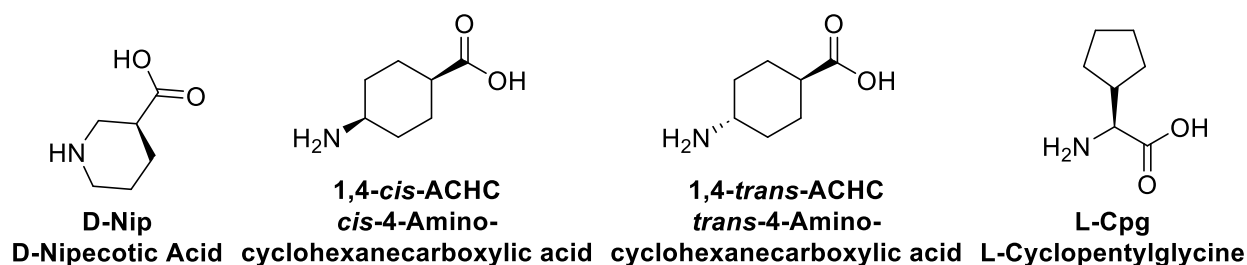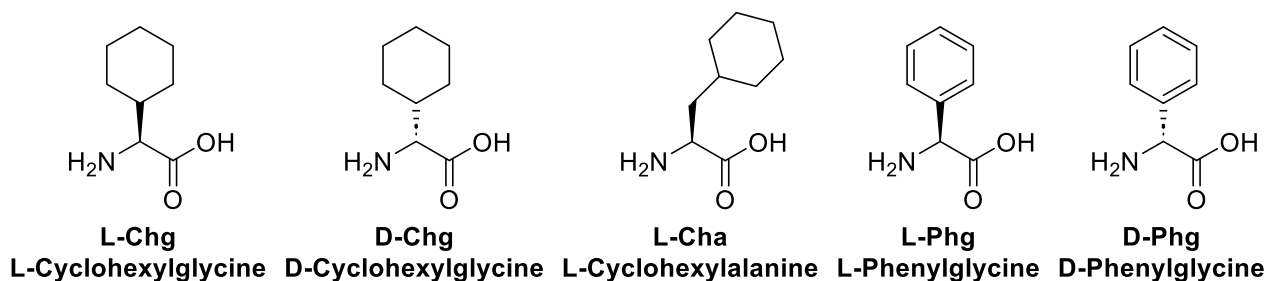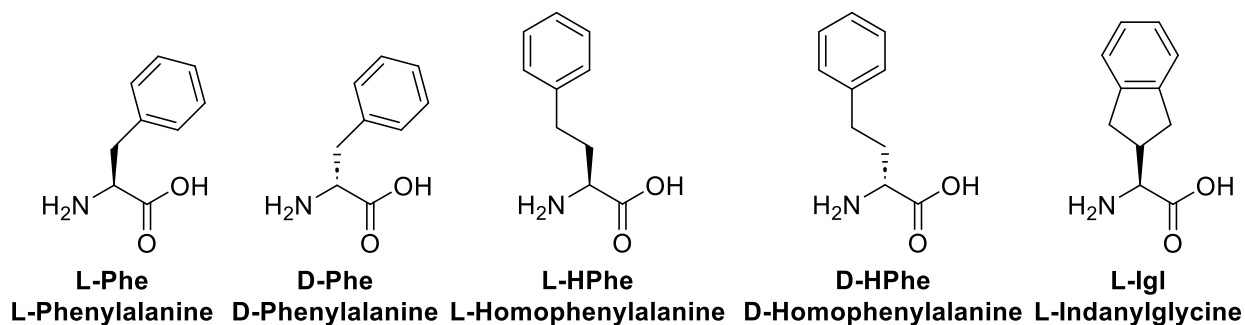

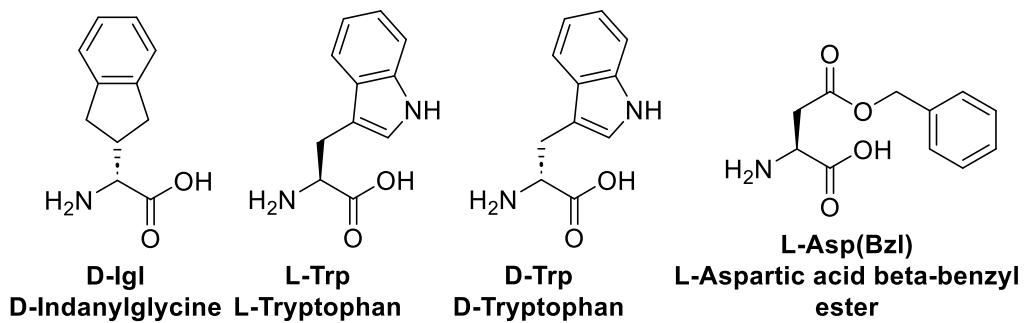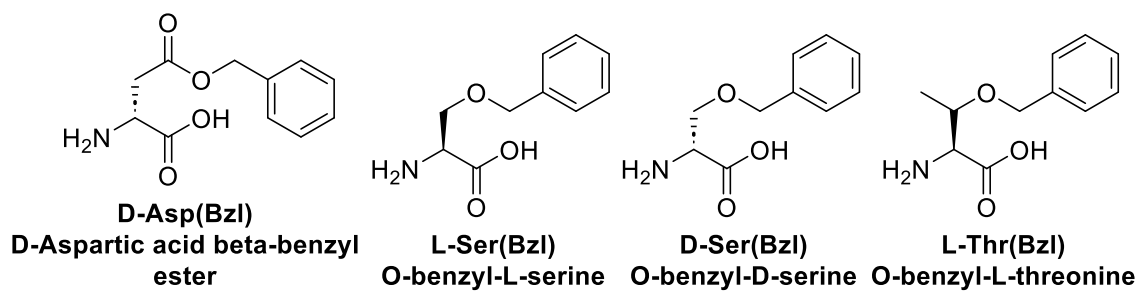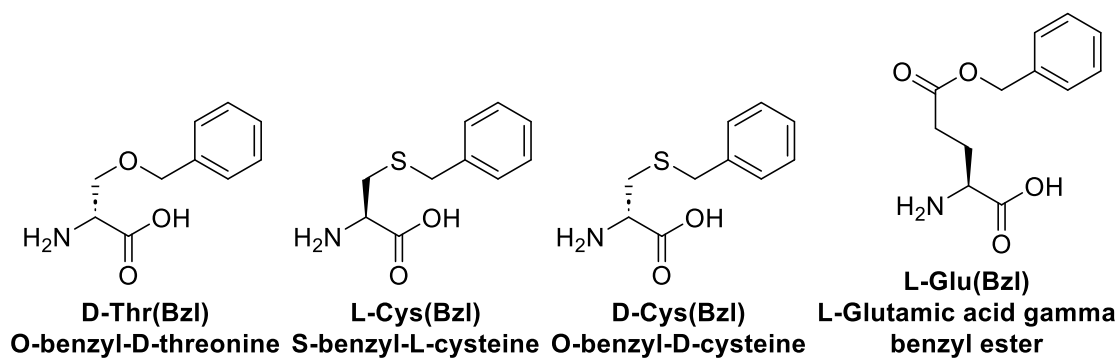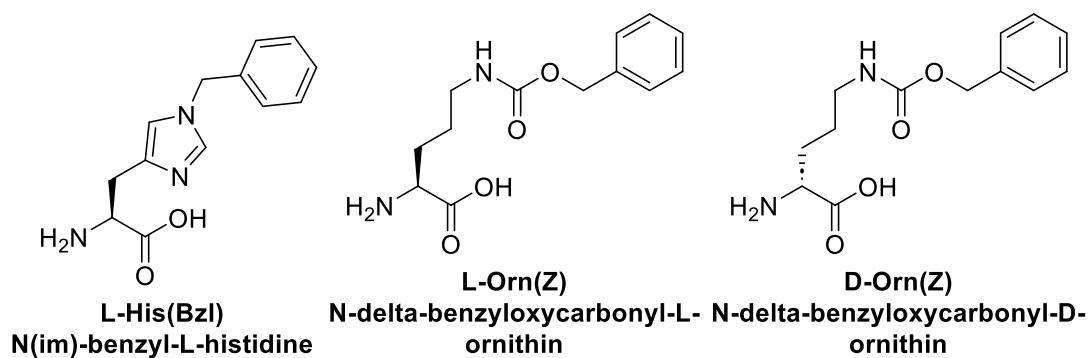

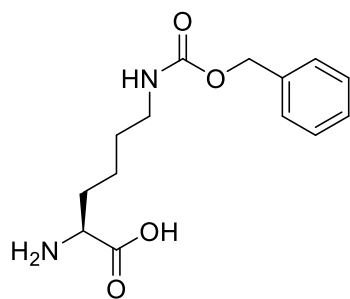

**L-Lys(Z)**  
**N-epsilon-**  
**benzyloxycarbonyl-L-lysine**

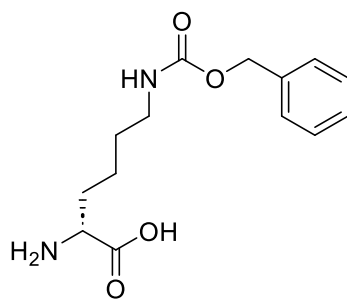

**D-Lys(Z)**  
**N-epsilon-**  
**benzyloxycarbonyl-D-lysine**

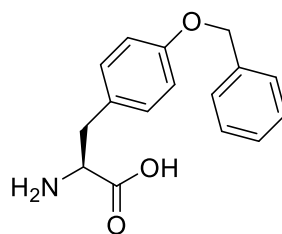

**L-Tyr(Bzl)**  
**O-benzyl-L-tyrosine**

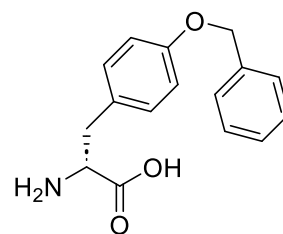

**D-Tyr(Bzl)**  
**O-benzyl-D-tyrosine**

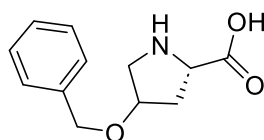

**L-Hyp(Bzl)**  
**O-benzyl-L-hydroxyproline**

(1) Boc-L-Val-Gly-Val<sup>P</sup>(OPh-4-SCH<sub>3</sub>)<sub>2</sub>

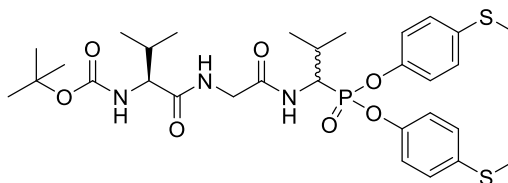

**Name:** *tert*-butyl ((2*S*)-1-((2-((1-(bis(4-(methylthio)phenoxy)phosphoryl)-2-methylpropyl)amino)-2-oxoethyl)amino)-3-methyl-1-oxobutan-2-yl)carbamate

<sup>31</sup>P NMR (162 MHz, Chloroform-*d*) δ 17.70 (s, 49%), 17.68 (s, 51%).

<sup>1</sup>H NMR (400 MHz, Chloroform-*d*) δ 7.43 – 7.30 (m, 1H, NH), 7.21 – 6.95 (m, 9H, 8xArH, NH), 5.24 (d, *J* = 8.6 Hz, 1H, NH), 4.79 – 4.66 (m, 1H, CHP), 4.07 – 3.80 (m, 3H, CH, CH<sub>2</sub>), 2.43 – 2.40 (m, 6H, 2xSCH<sub>3</sub>), 2.38 – 2.29 (m, 1H, CH), 2.16 – 2.05 (m, 1H, CH), 1.41 (s, 9H, Boc), 1.04 – 1.00 (m, 6H, 2xCH<sub>3</sub>), 0.92 (d, *J* = 6.8 Hz, 3H, CH<sub>3</sub>), 0.87 (d, *J* = 6.8 Hz, 3H, CH<sub>3</sub>).

**HRMS:** C<sub>30</sub>H<sub>44</sub>N<sub>3</sub>O<sub>7</sub>PS<sub>2</sub> [M+Na]<sup>+</sup> calc. 676.2256 found 676.2239

**HPLC:** purity >99%; retention time 17.807 min

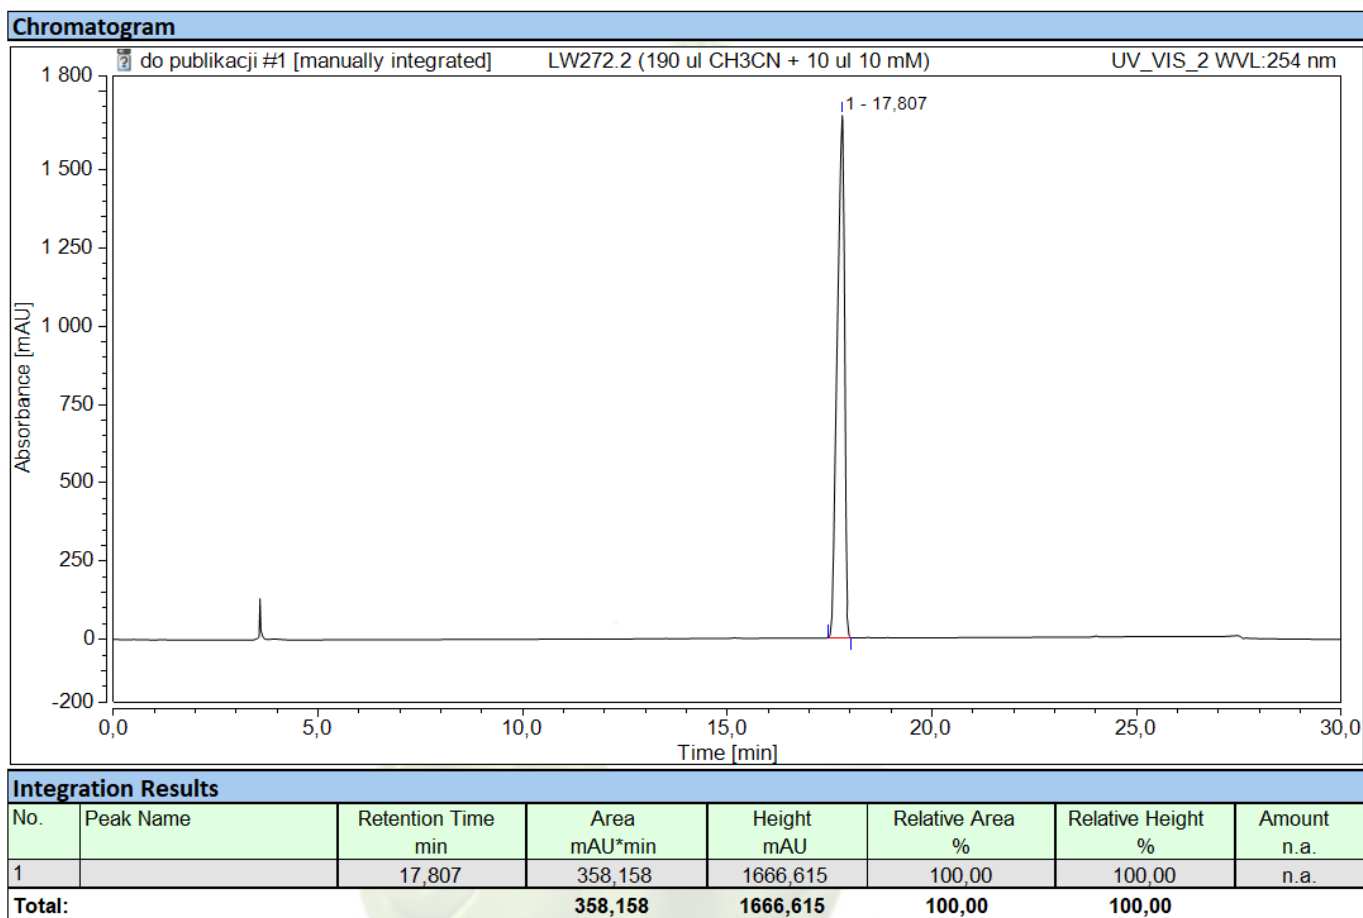

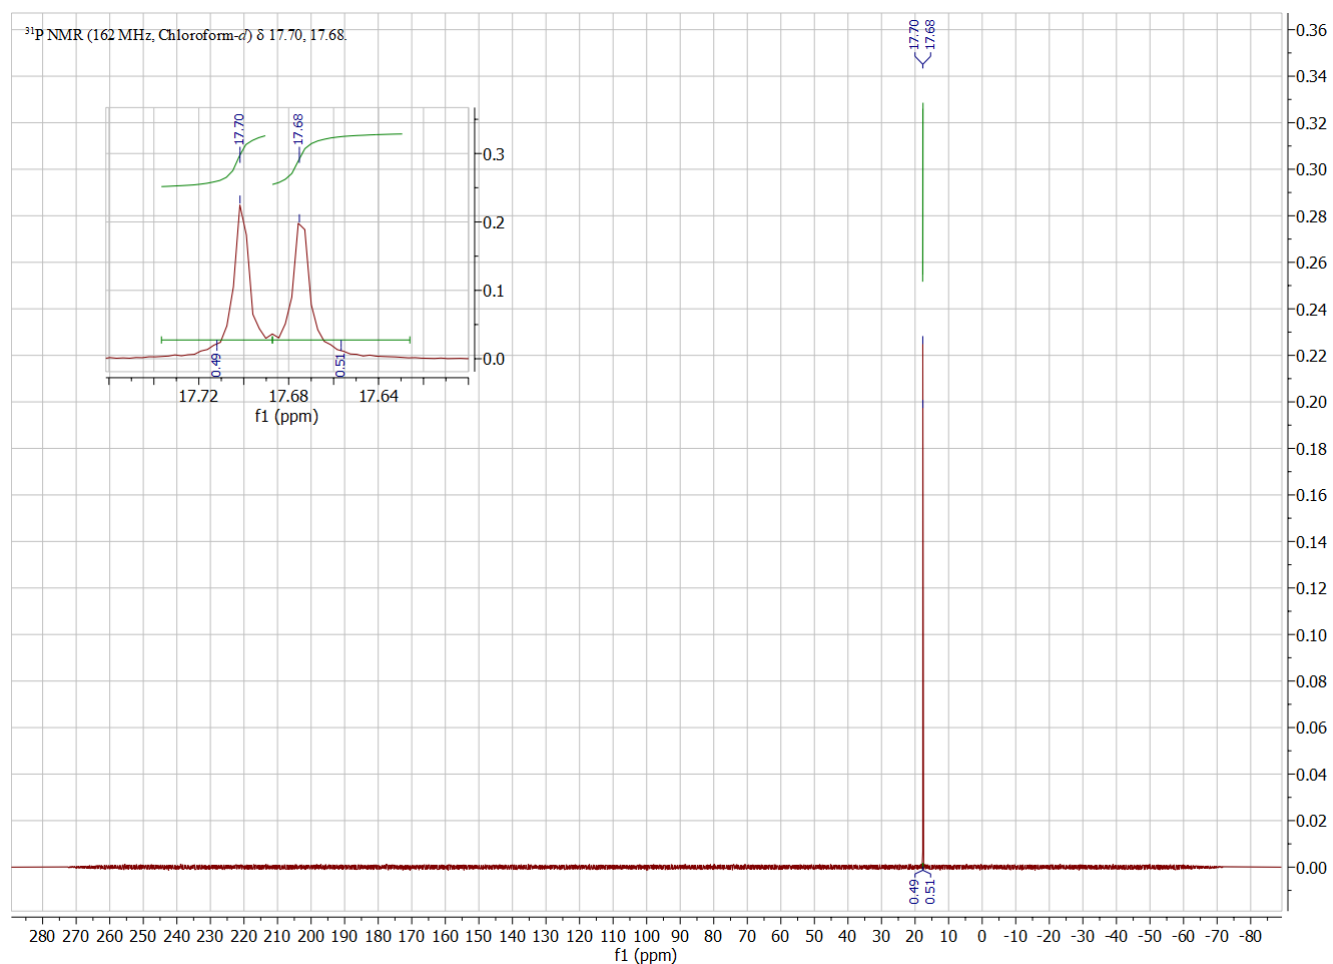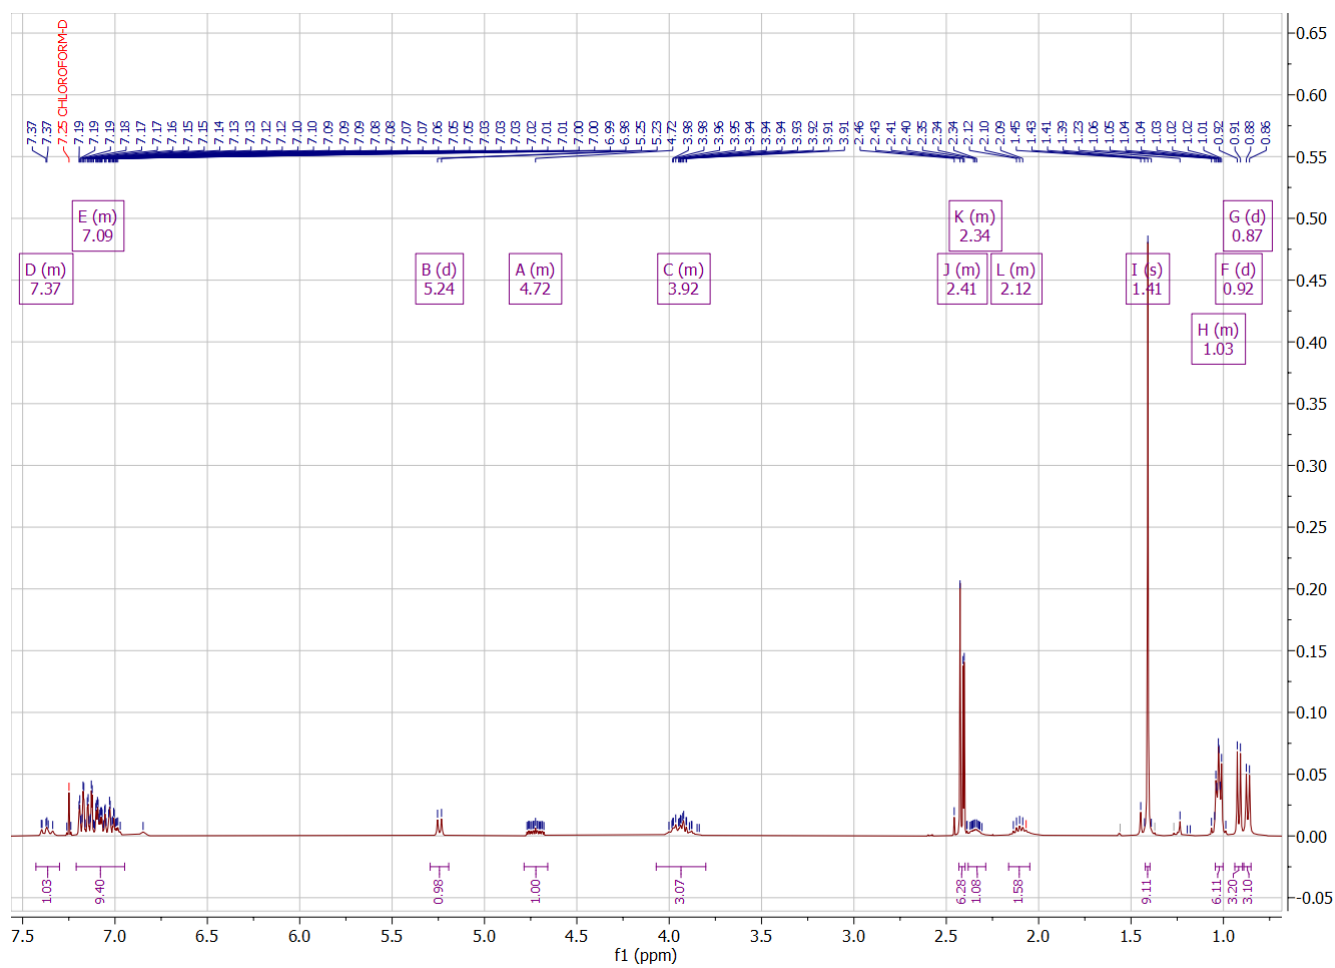

(2) Boc-L-Val-L-Ala-Val<sup>P</sup>(OPh-4-SCH<sub>3</sub>)<sub>2</sub>

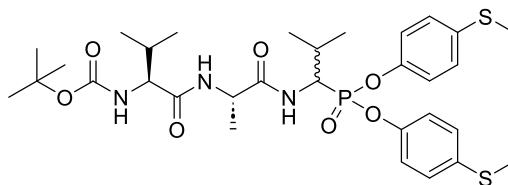

**Name:** *tert*-butyl ((2*S*)-1-(((2*S*)-1-((1-(bis(4-(methylthio)phenoxy)phosphoryl)-2-methylpropyl)amino)-1-oxopropan-2-yl)amino)-3-methyl-1-oxobutan-2-yl)carbamate

<sup>31</sup>P NMR (162 MHz, Chloroform-*d*) δ 17.98 (s, 50%), 17.90 (s, 50%).

<sup>1</sup>H NMR (400 MHz, Chloroform-*d*) δ 7.22 – 6.98 (m, 9H, 8xArH, NH), 6.64 (dd, *J* = 22.6, 7.2 Hz, 1H, NH), 5.12 (dd, *J* = 24.4, 8.4 Hz, 1H, NH), 4.78 – 4.63 (m, 1H, CHP), 4.61 – 4.50 (m, 1H, CH), 3.95 – 3.86 (m, 1H, CH), 2.43 – 2.41 (m, 6H, 2xSCH<sub>3</sub>), 2.40 – 2.29 (m, 1H, CH), 2.16 – 2.04 (m, 1H, CH), 1.42 (d, *J* = 4.9 Hz, 9H, Boc), 1.32 (dd, *J* = 43.9, 7.0 Hz, 3H, CH<sub>3</sub>), 1.10 – 0.98 (m, 6H, 2xCH<sub>3</sub>), 0.95 – 0.81 (m, 6H, 2xCH<sub>3</sub>).

**HRMS:** C<sub>31</sub>H<sub>46</sub>N<sub>3</sub>O<sub>7</sub>PS<sub>2</sub> [M+Na]<sup>+</sup> calc. 690.2412 found 690.2400

**HPLC:** purity >99%; retention time 18.087 min

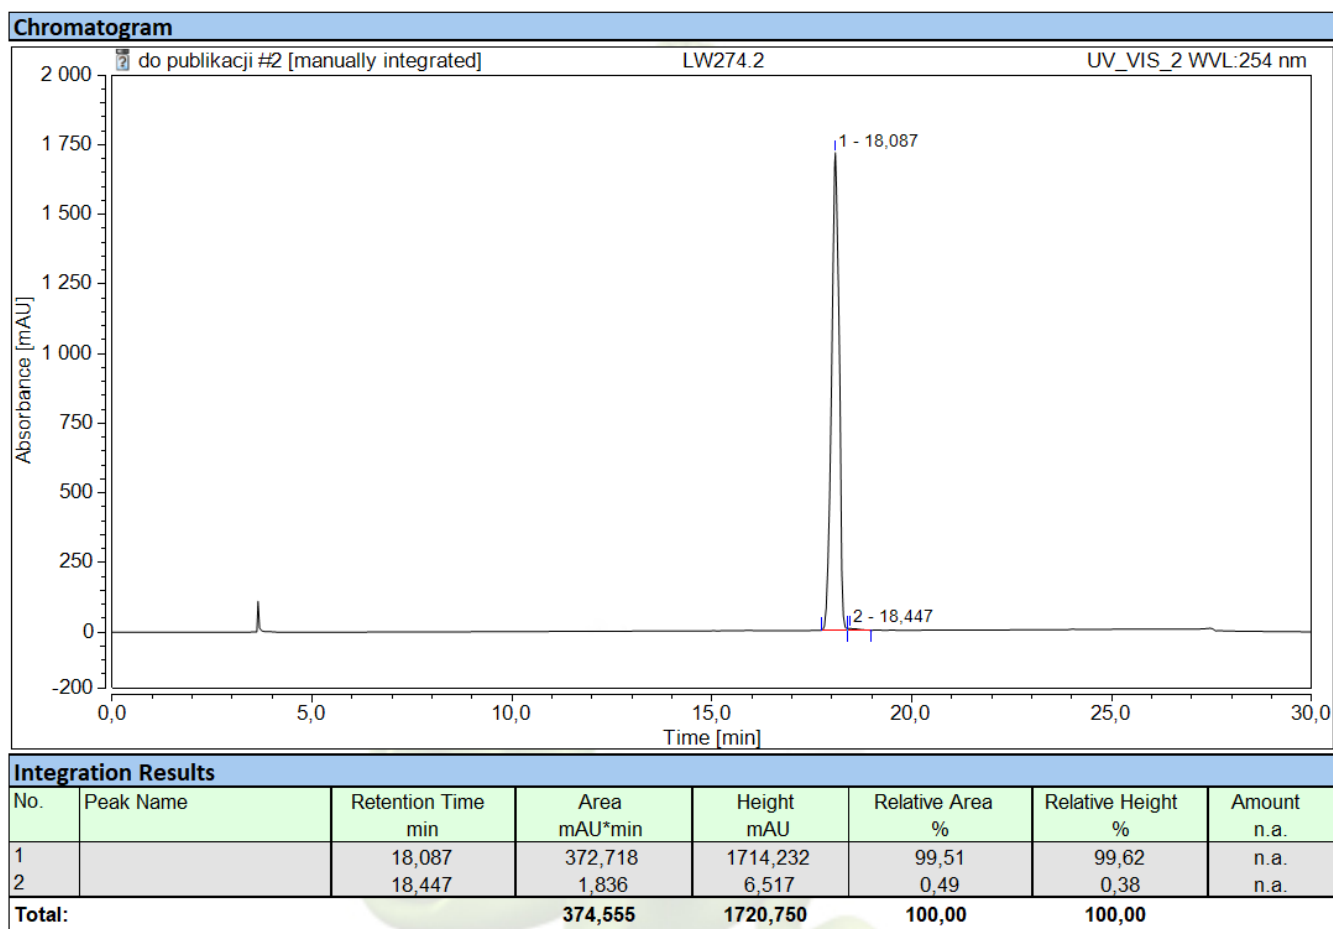

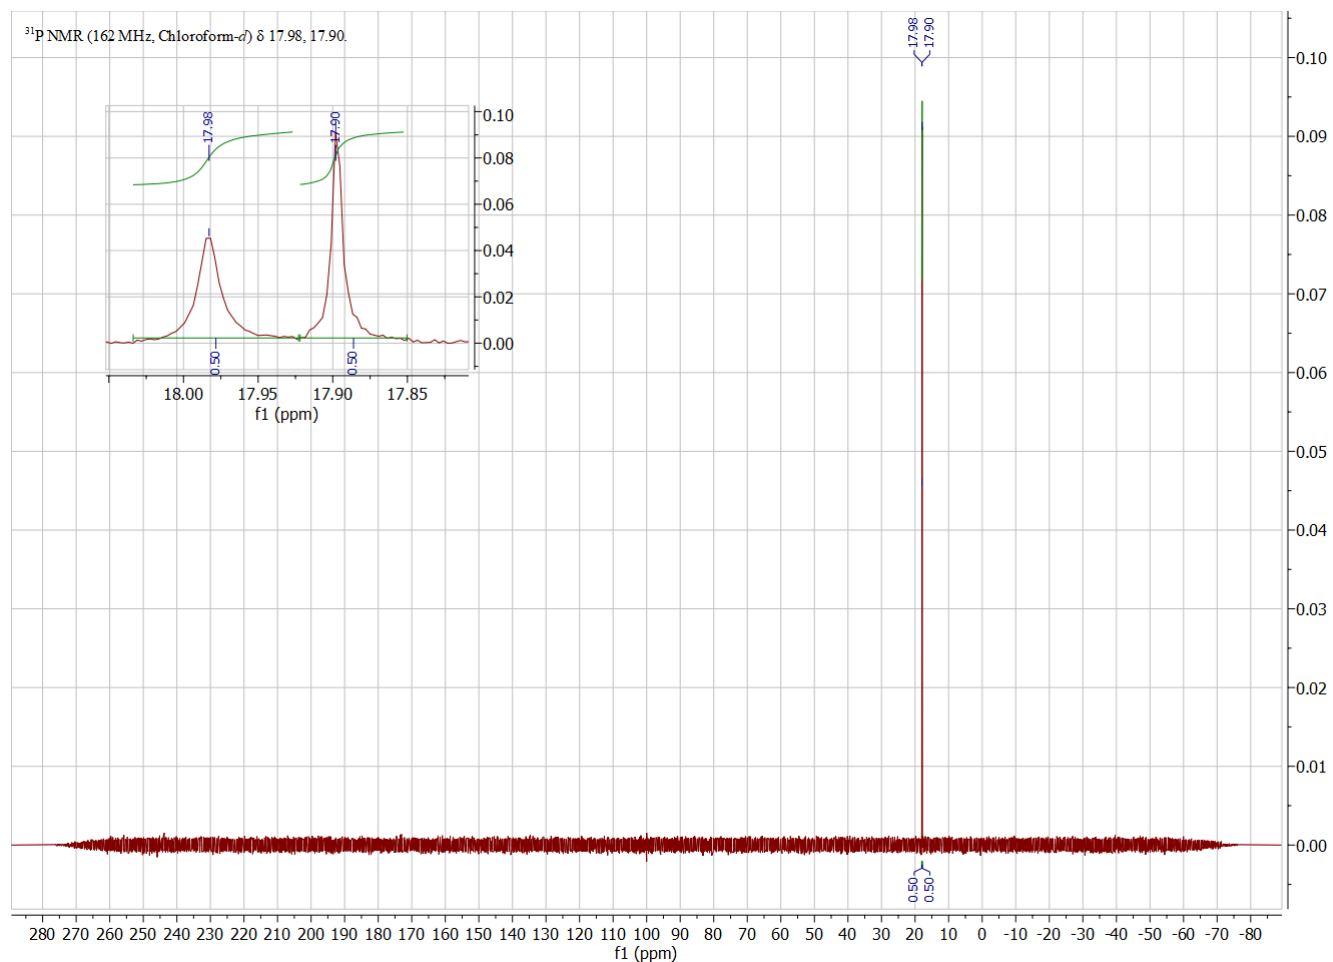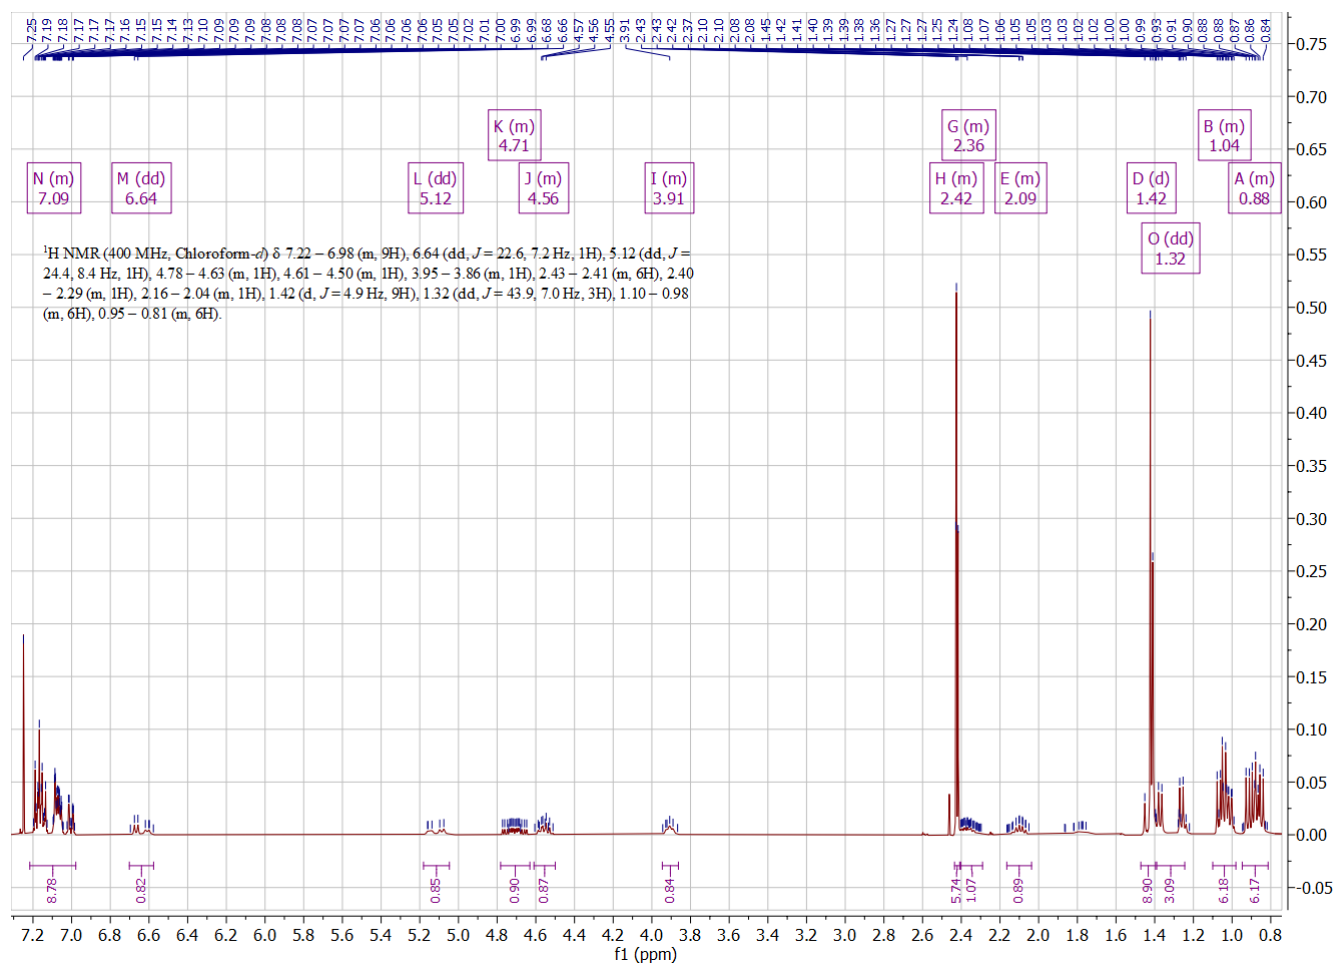



(3) Boc-L-Val-D-Ala-Val<sup>P</sup>(OPh-4-SCH<sub>3</sub>)<sub>2</sub>

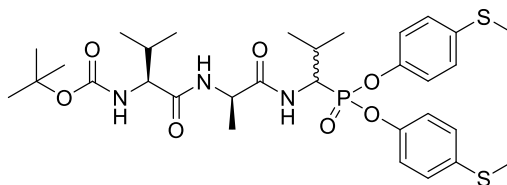

**Name:** *tert*-butyl ((2S)-1-(((2R)-1-((1-(bis(4-(methylthio)phenoxy)phosphoryl)-2-methylpropyl)amino)-1-oxopropan-2-yl)amino)-3-methyl-1-oxobutan-2-yl)carbamate

<sup>31</sup>P NMR (162 MHz, Chloroform-d) δ 18.12 (s, 62%), 17.93 (s, 38%).

<sup>1</sup>H NMR (400 MHz, Chloroform-d) δ 7.22 – 7.12 (m, 5H, 4xArH, NH), 7.11 – 6.99 (m, 4H, 4xArH), 6.82 – 6.55 (m, 1H, NH), 5.15 (dd, J = 28.0, 8.4 Hz, 1H, NH), 4.76 – 4.64 (m, 1H, CHP), 4.62 – 4.49 (m, 1H, CH), 3.98 – 3.85 (m, 1H, CH), 2.46 – 2.39 (m, 6H, 2xSCH<sub>3</sub>), 2.40 – 2.29 (m, 1H, CH), 2.16 – 2.03 (m, 1H, CH), 1.46 – 1.38 (m, 9H, Boc), 1.31 (dd, J = 35.0, 7.0 Hz, 3H, CH<sub>3</sub>), 1.06 – 0.97 (m, 6H, 2xCH<sub>3</sub>), 0.92 (dd, J = 6.8, 4.7 Hz, 3H, CH<sub>3</sub>), 0.86 (dd, J = 9.5, 6.7 Hz, 3H, CH<sub>3</sub>).

**HRMS:** C<sub>31</sub>H<sub>46</sub>N<sub>3</sub>O<sub>7</sub>PS<sub>2</sub> [M+Na]<sup>+</sup> calc. 690.2412 found 690.2406

**HPLC:** purity >99%; retention time 18.173 min

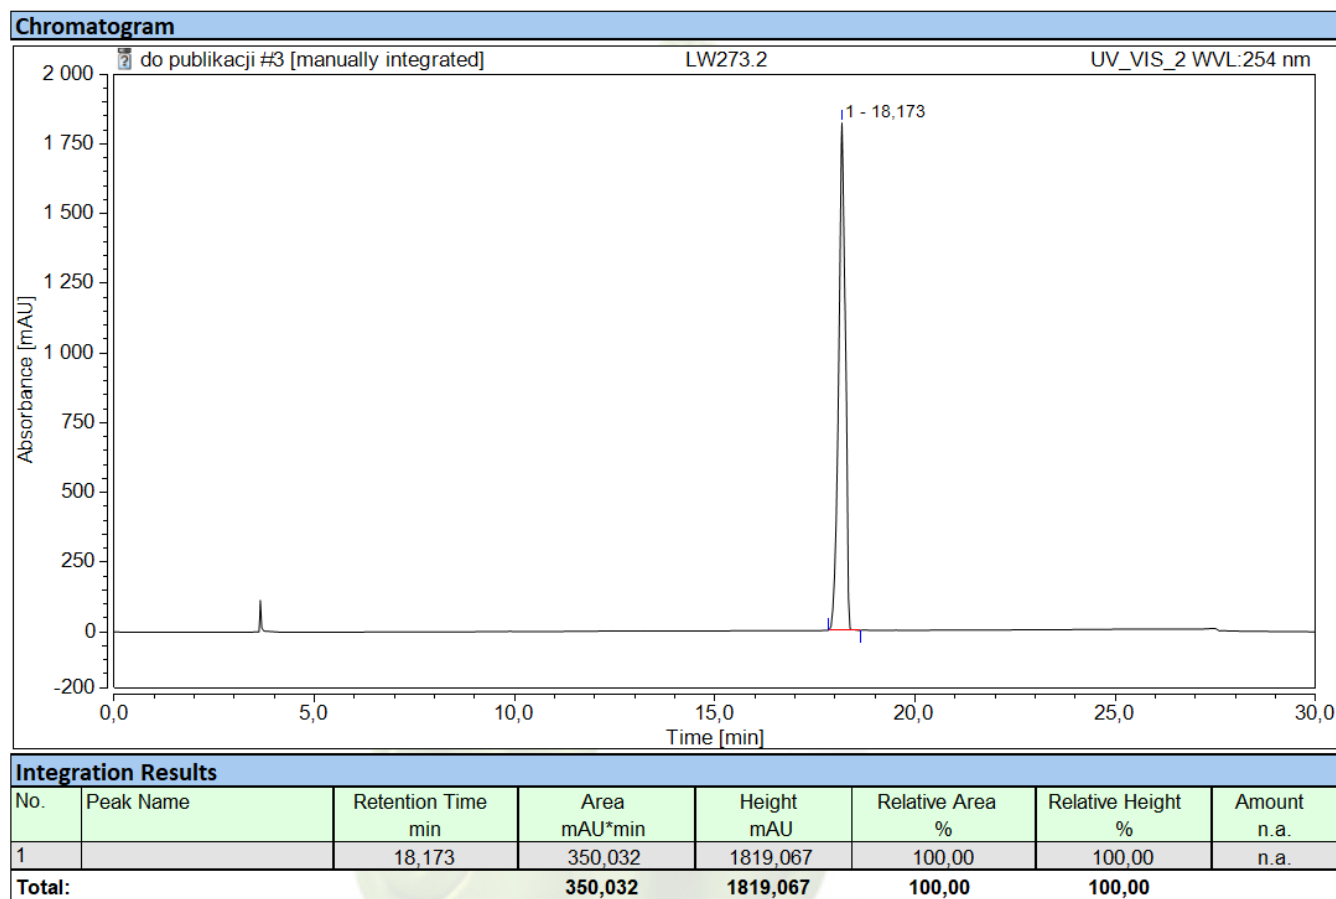

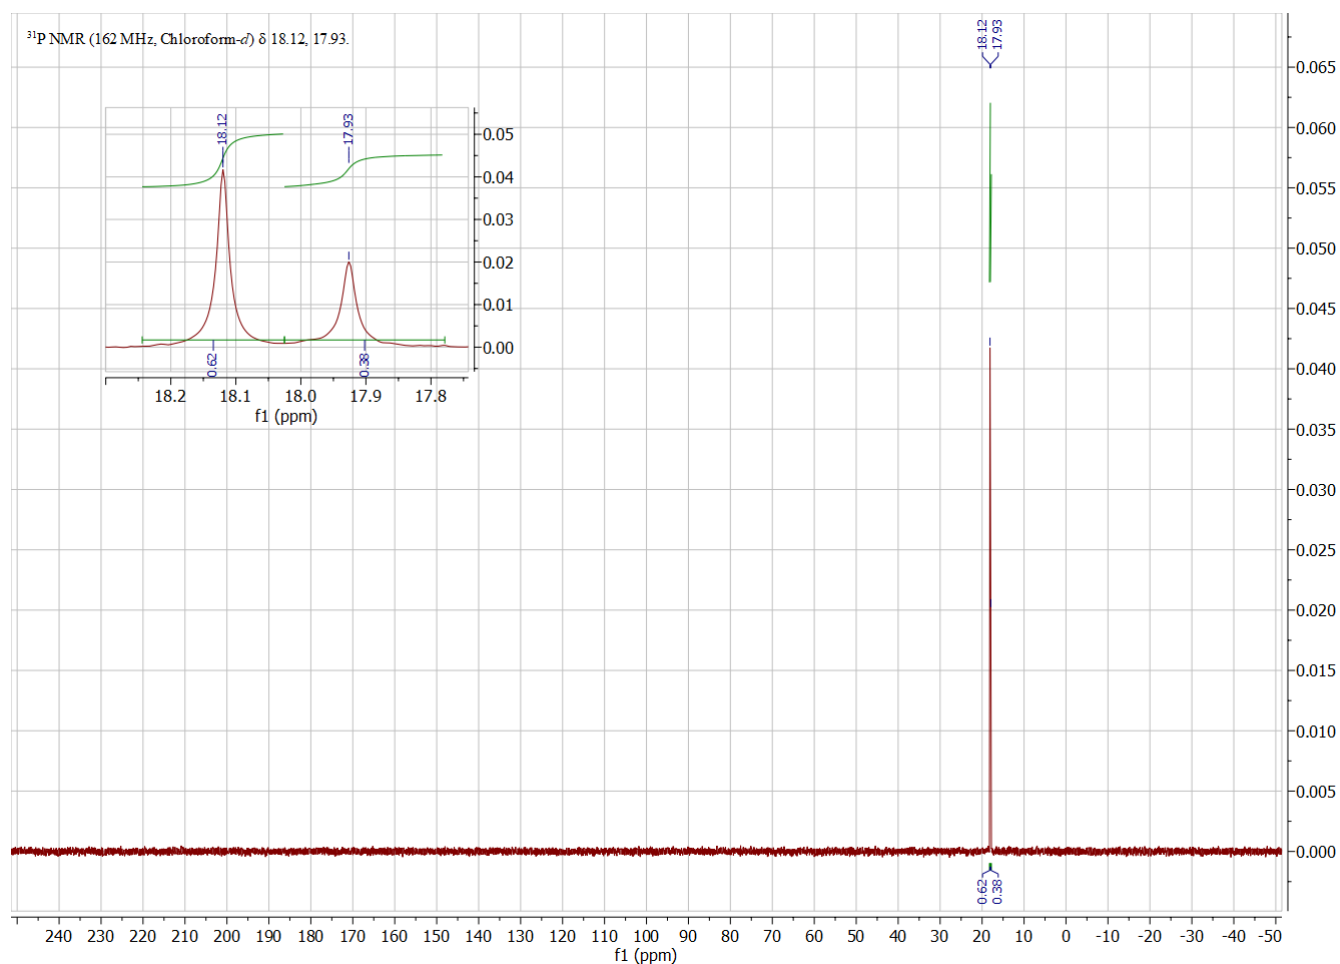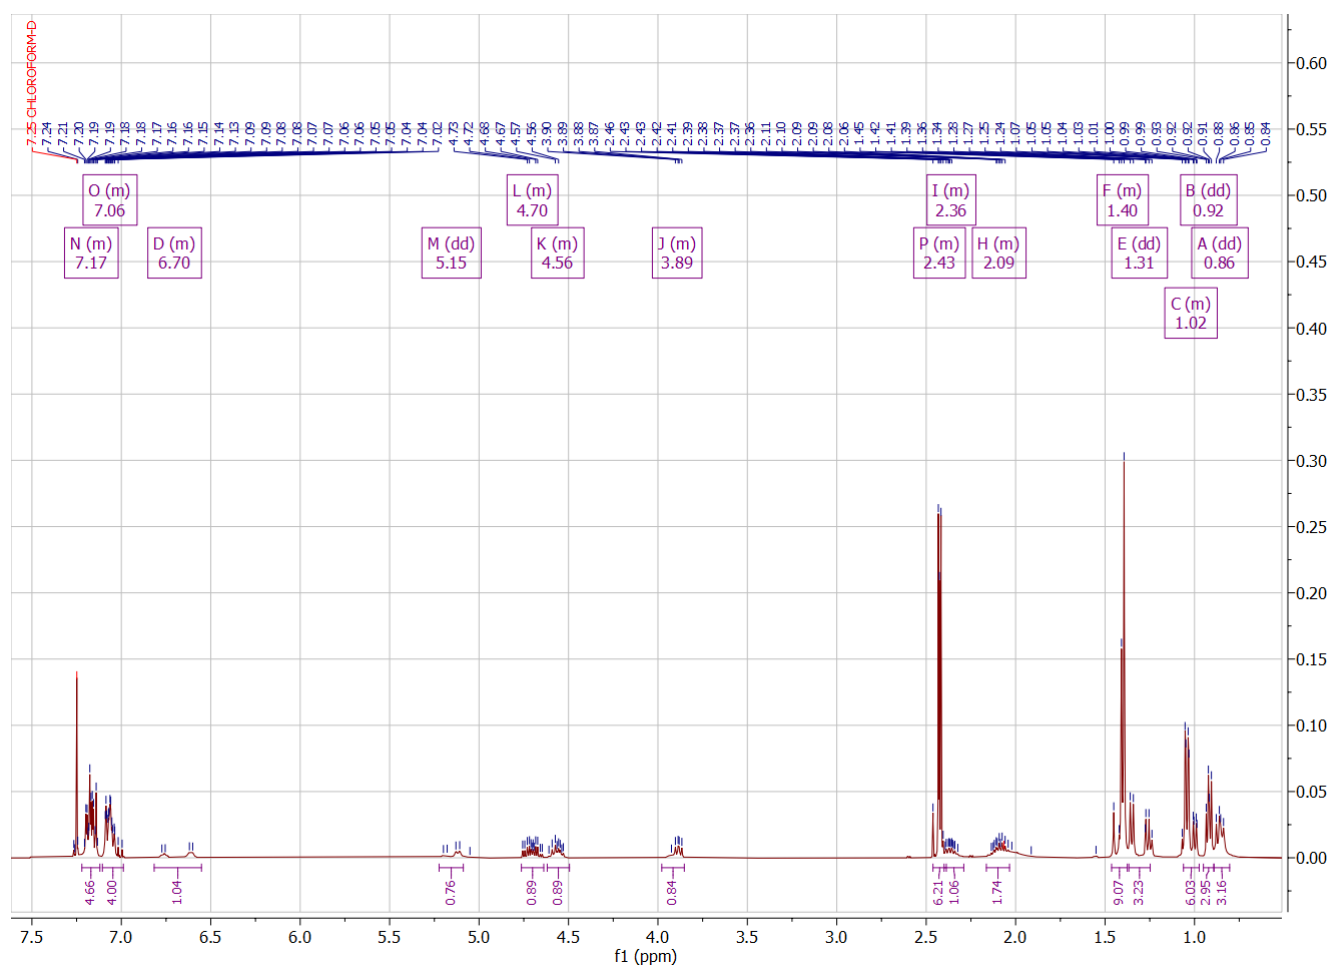

**(4) Boc-L-Val-Aib-Val<sup>P</sup>(OPh-4-SCH<sub>3</sub>)<sub>2</sub>**

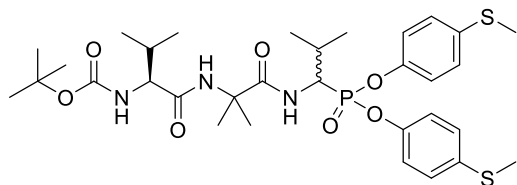

**Name:** *tert*-butyl ((2*S*)-1-((1-((1-(bis(4-(methylthio)phenoxy)phosphoryl)-2-methylpropyl)amino)-2-methyl-1-oxopropan-2-yl)amino)-3-methyl-1-oxobutan-2-yl)carbamate

<sup>31</sup>P NMR (162 MHz, Chloroform-*d*) δ 18.81 (s, 36%), 18.71 (s, 64%).

<sup>1</sup>H NMR (400 MHz, Chloroform-*d*) δ 7.32 (dd, *J* = 35.1, 10.0 Hz, 1H, NH), 7.22 – 7.15 (m, 4H, 4xArH), 7.14 – 7.03 (m, 4H, 4xArH), 6.46 (d, *J* = 26.2 Hz, 1H, NH), 4.99 (dd, *J* = 28.6, 7.7 Hz, 1H, NH), 4.78 – 4.69 (m, 1H, CHP), 3.84 – 3.77 (m, 1H, CH), 2.46 – 2.42 (m, 6H, 2xSCH<sub>3</sub>), 2.42 – 2.32 (m, 1H, CH), 2.21 – 2.12 (m, 1H, CH), 1.58 – 1.44 (m, 6H, 2xCH<sub>3</sub>), 1.41 (d, *J* = 2.7 Hz, 9H, Boc), 1.12 – 1.03 (m, 6H, 2xCH<sub>3</sub>), 0.98 – 0.88 (m, 6H, 2xCH<sub>3</sub>).

**HRMS:** C<sub>32</sub>H<sub>48</sub>N<sub>3</sub>O<sub>7</sub>PS<sub>2</sub> [M+Na]<sup>+</sup> calc. 704.2569 found 704.2555

**HPLC:** purity >99%; retention time 18.863 min

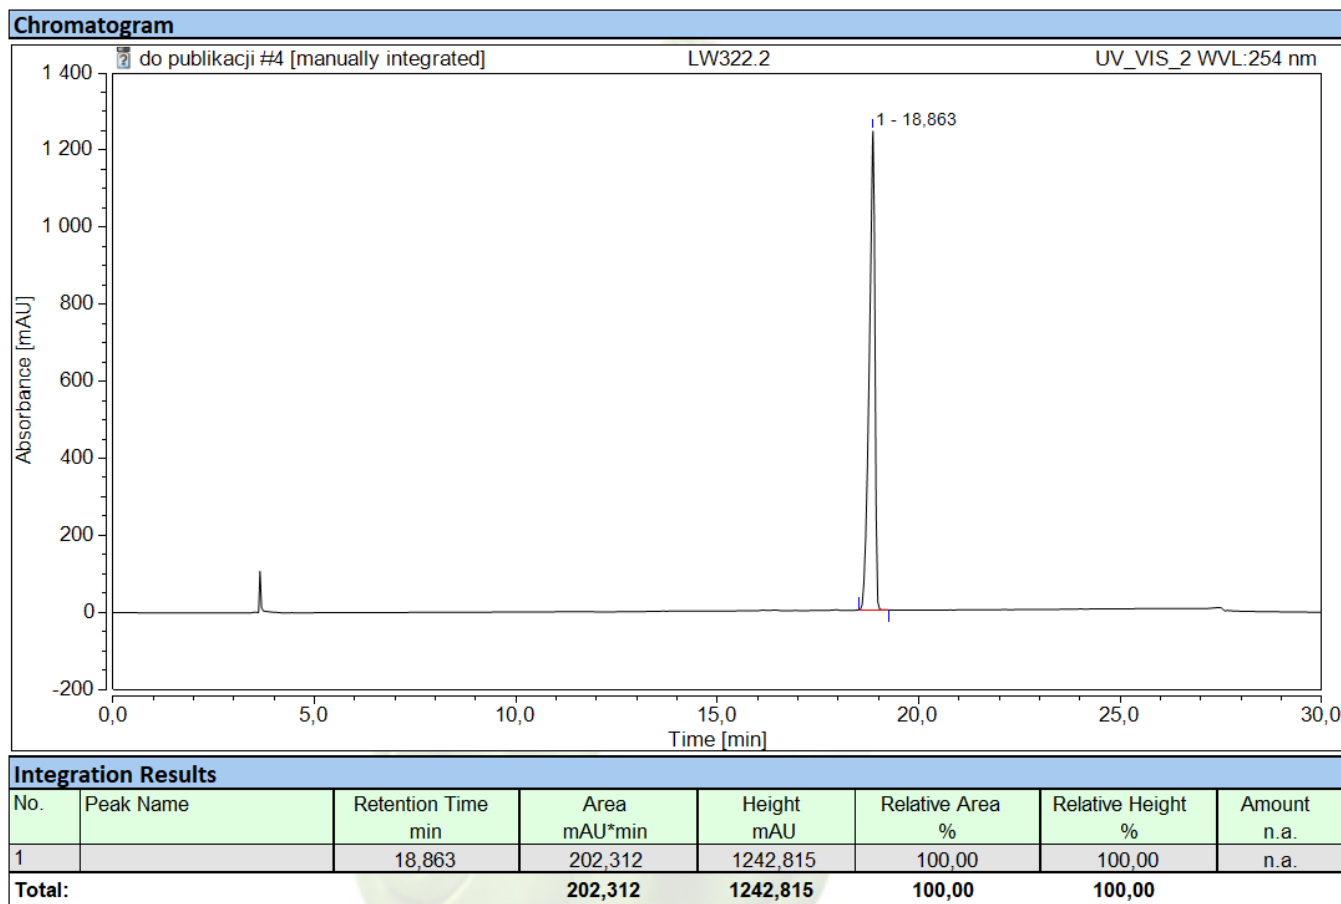

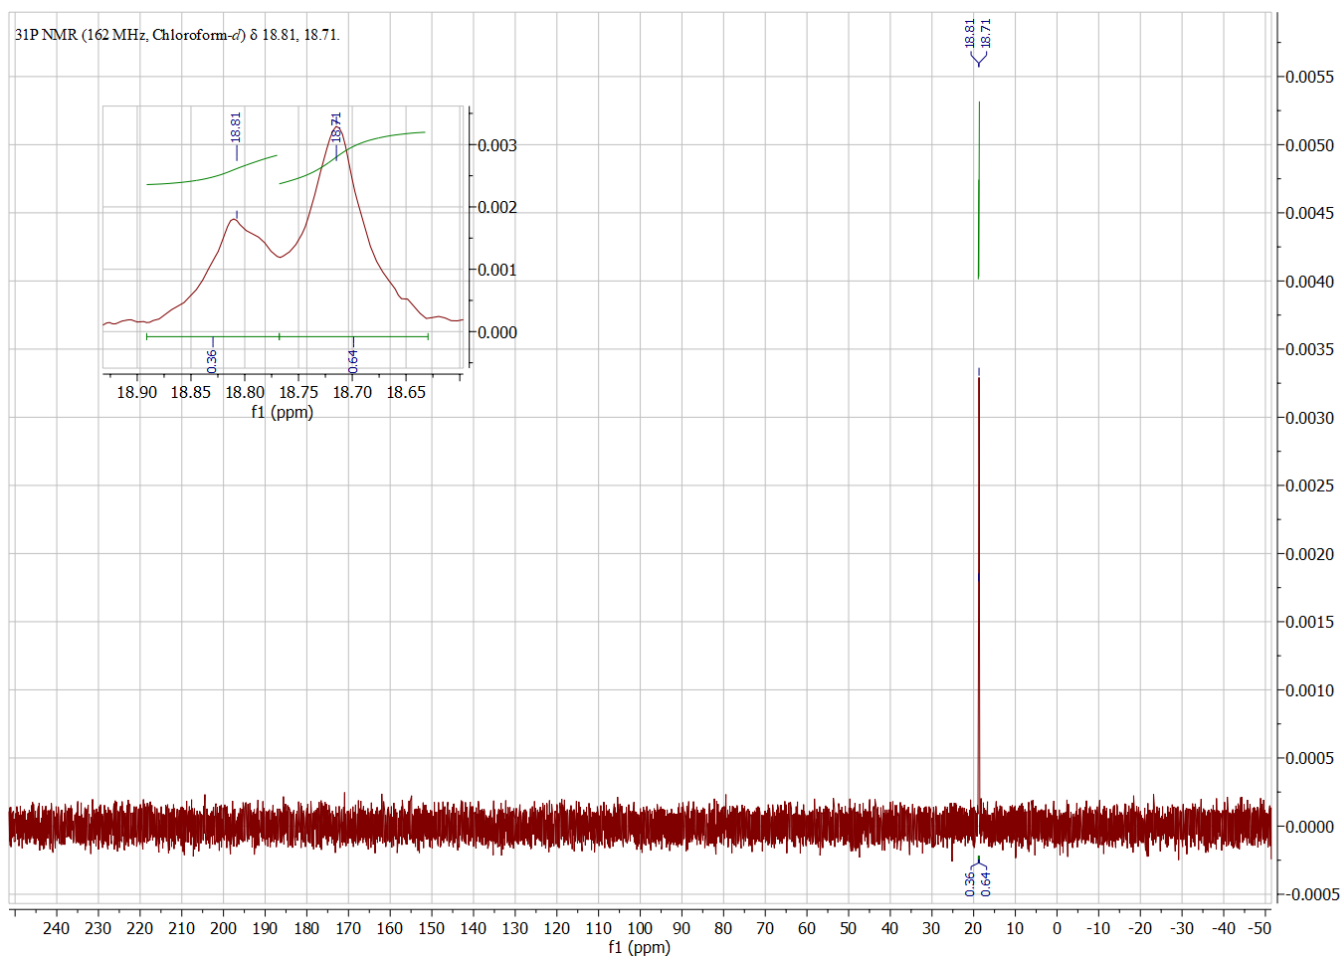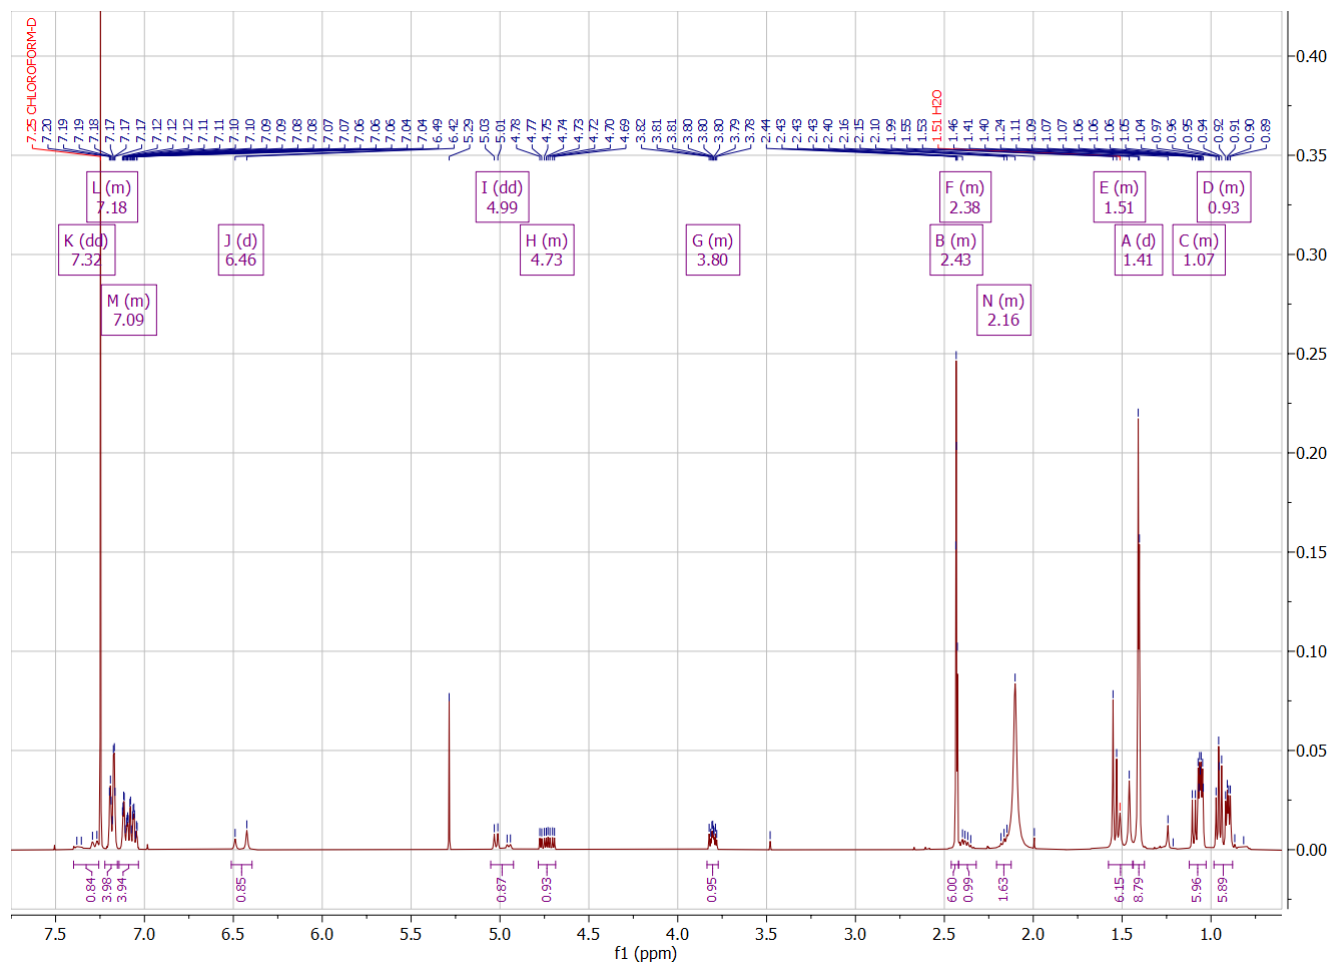

(5) Boc-L-Val-beta-Ala-Val<sup>P</sup>(OPh-4-SCH<sub>3</sub>)<sub>2</sub>

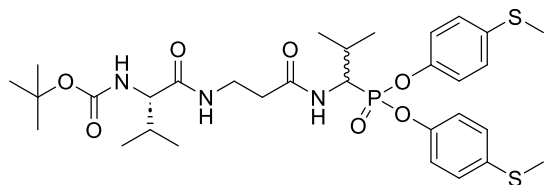

**Name:** *tert*-butyl ((2*S*)-1-((3-((1-(bis(4-(methylthio)phenoxy)phosphoryl)-2-methylpropyl)amino)-3-oxopropyl)amino)-3-methyl-1-oxobutan-2-yl)carbamate

<sup>31</sup>P NMR (162 MHz, Chloroform-*d*) δ 20.82 (s, 50%), 18.45 (s, 50%).

<sup>1</sup>H NMR (400 MHz, Chloroform-*d*) δ 7.39 (d, *J* = 9.3 Hz, 1H, NH), 7.23 – 6.97 (m, 8H, 8xArH), 6.93 – 6.70 (m, 1H, NH), 5.20 – 5.06 (m, 1H, NH), 4.77 – 4.59 (m, 1H, CHP), 3.87 – 3.72 (m, 1H, CH), 3.60 – 3.04 (m, 2H, CH<sub>2</sub>), 2.53 – 2.40 (m, 7H, 2xSCH<sub>3</sub>, CH), 2.39 – 2.22 (m, 2H, CH<sub>2</sub>), 2.14 – 1.75 (m, 1H, CH), 1.41 (d, *J* = 6.3 Hz, 9H, Boc), 1.18 – 0.94 (m, 6H, 2xCH<sub>3</sub>), 0.90 – 0.72 (m, 6H, 2xCH<sub>3</sub>).

**HRMS:** C<sub>31</sub>H<sub>46</sub>N<sub>3</sub>O<sub>7</sub>PS<sub>2</sub> [M+Na]<sup>+</sup> calc. 690.2412 found 690.2378

**HPLC:** purity >98%; retention time 17.573 and 17.750 min

**Chromatogram**

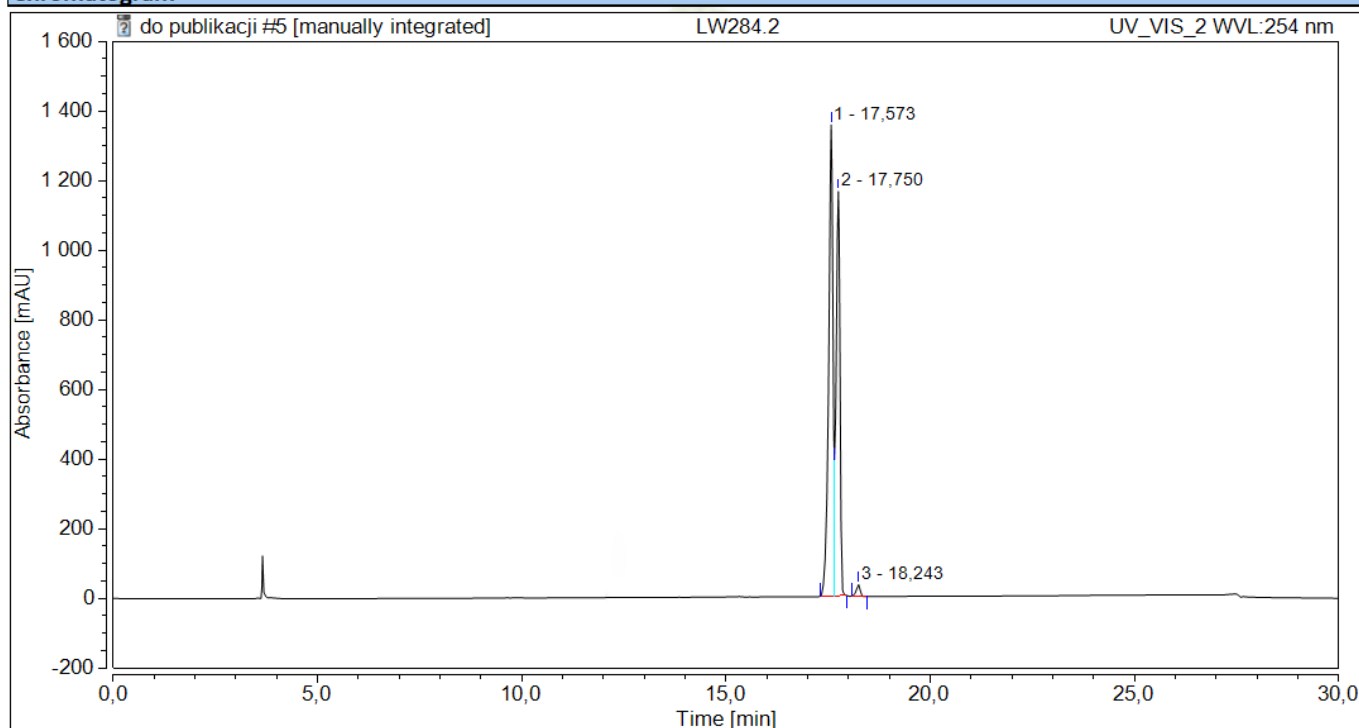

**Integration Results**

| No.           | Peak Name | Retention Time<br>min | Area<br>mAU*min | Height<br>mAU   | Relative Area<br>% | Relative Height<br>% | Amount<br>n.a. |
|---------------|-----------|-----------------------|-----------------|-----------------|--------------------|----------------------|----------------|
| 1             |           | 17,573                | 164,434         | 1352,920        | 56,16              | 53,11                | n.a.           |
| 2             |           | 17,750                | 124,739         | 1161,031        | 42,61              | 45,58                | n.a.           |
| 3             |           | 18,243                | 3,601           | 33,565          | 1,23               | 1,32                 | n.a.           |
| <b>Total:</b> |           |                       | <b>292,774</b>  | <b>2547,516</b> | <b>100,00</b>      | <b>100,00</b>        |                |

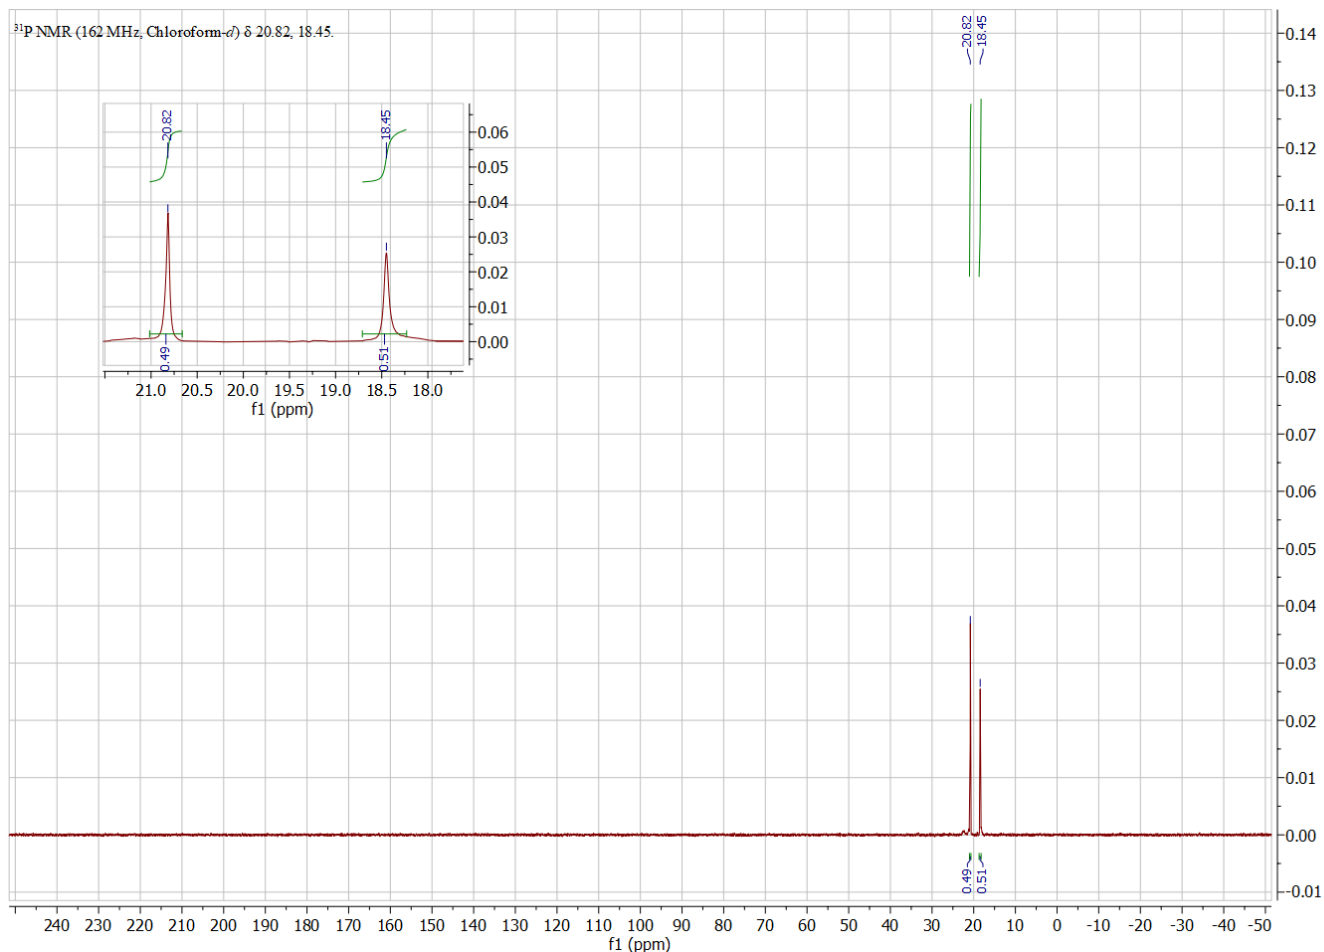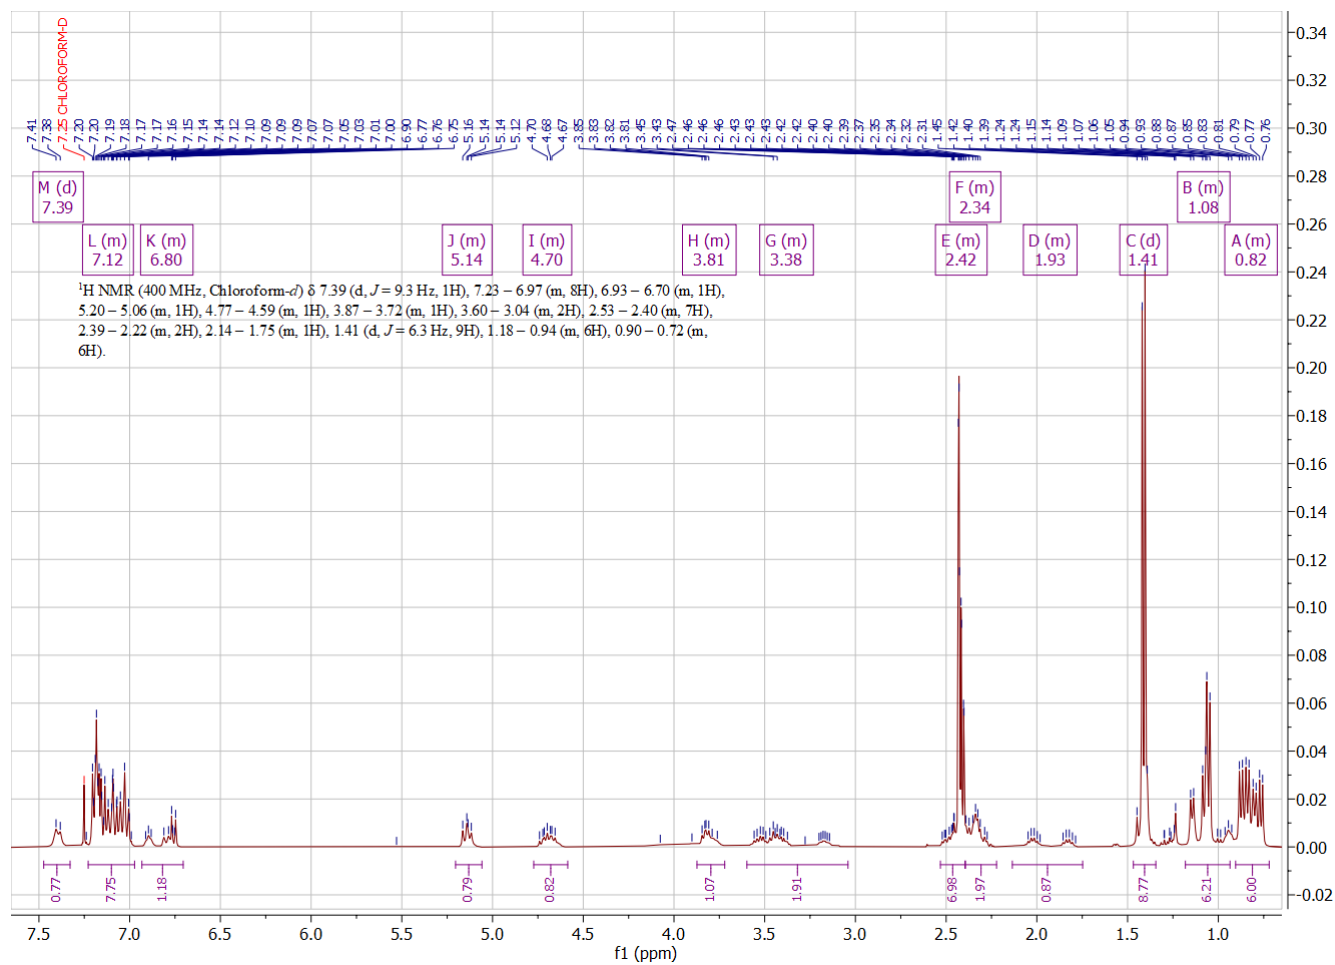

**(6) Boc-L-Val-L-Abu-Val<sup>P</sup>(OPh-4-SCH<sub>3</sub>)<sub>2</sub>**

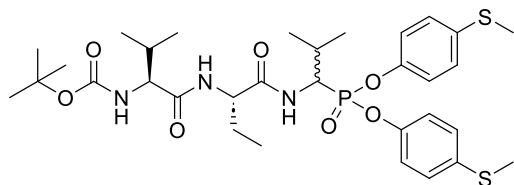

**Name:** *tert*-butyl ((2*S*)-1-(((2*S*)-1-((1-(bis(4-(methylthio)phenoxy)phosphoryl)-2-methylpropyl)amino)-1-oxobutan-2-yl)amino)-3-methyl-1-oxobutan-2-yl)carbamate

<sup>31</sup>P NMR (162 MHz, Chloroform-*d*) δ 18.19 (s, 53%), 18.09 (s, 47%).

<sup>1</sup>H NMR (400 MHz, Chloroform-*d*) δ 7.20 – 7.13 (m, 4H, 4xArH), 7.11 – 6.92 (m, 5H, 4xArH, NH), 6.61 (dd, *J* = 29.2, 7.8 Hz, 1H, NH), 5.10 (dd, *J* = 45.3, 8.3 Hz, 1H, NH), 4.79 – 4.65 (m, 1H, CHP), 4.49 – 4.41 (m, 1H, CH), 3.89 (dd, *J* = 8.4, 6.3 Hz, 1H, CH), 2.46 – 2.39 (m, 6H, 2xSCH<sub>3</sub>), 2.41 – 2.30 (m, 1H, CH), 2.17 – 2.05 (m, 1H, CH), 1.98 – 1.73 (m, 1H, CH<sub>2</sub>), 1.71 – 1.55 (m, 1H, CH<sub>2</sub>), 1.41 (d, *J* = 6.2 Hz, 9H, Boc), 1.11 – 0.99 (m, 6H, 2xCH<sub>3</sub>), 0.95 – 0.83 (m, 9H, 3xCH<sub>3</sub>).

**HRMS:** C<sub>32</sub>H<sub>48</sub>N<sub>3</sub>O<sub>7</sub>PS<sub>2</sub> [M+Na]<sup>+</sup> calc. 704.2569 found 704.2588

**HPLC:** purity >99%; retention time 18.457 and 18.613 min

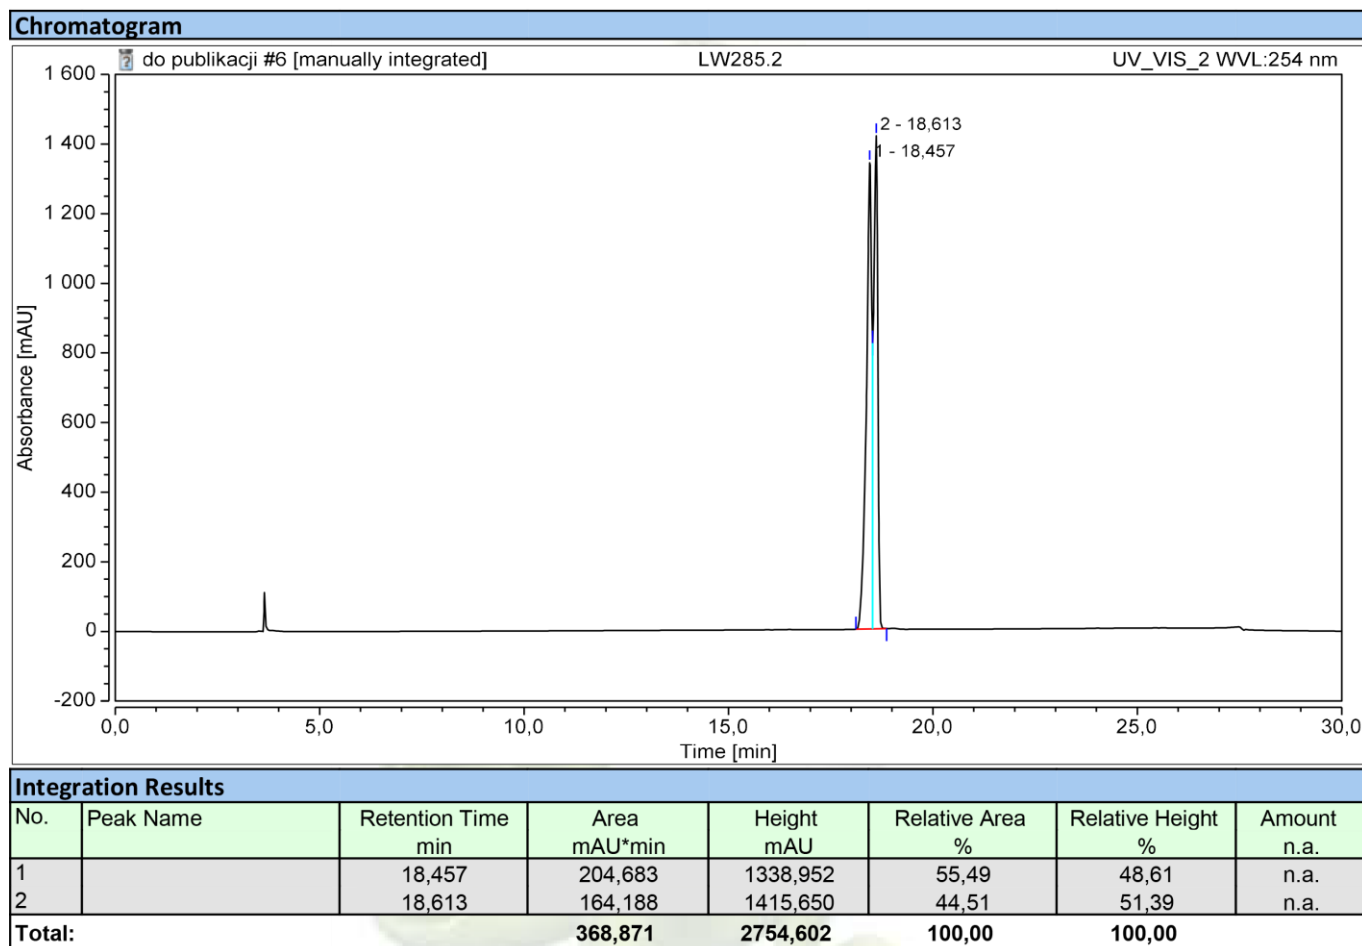

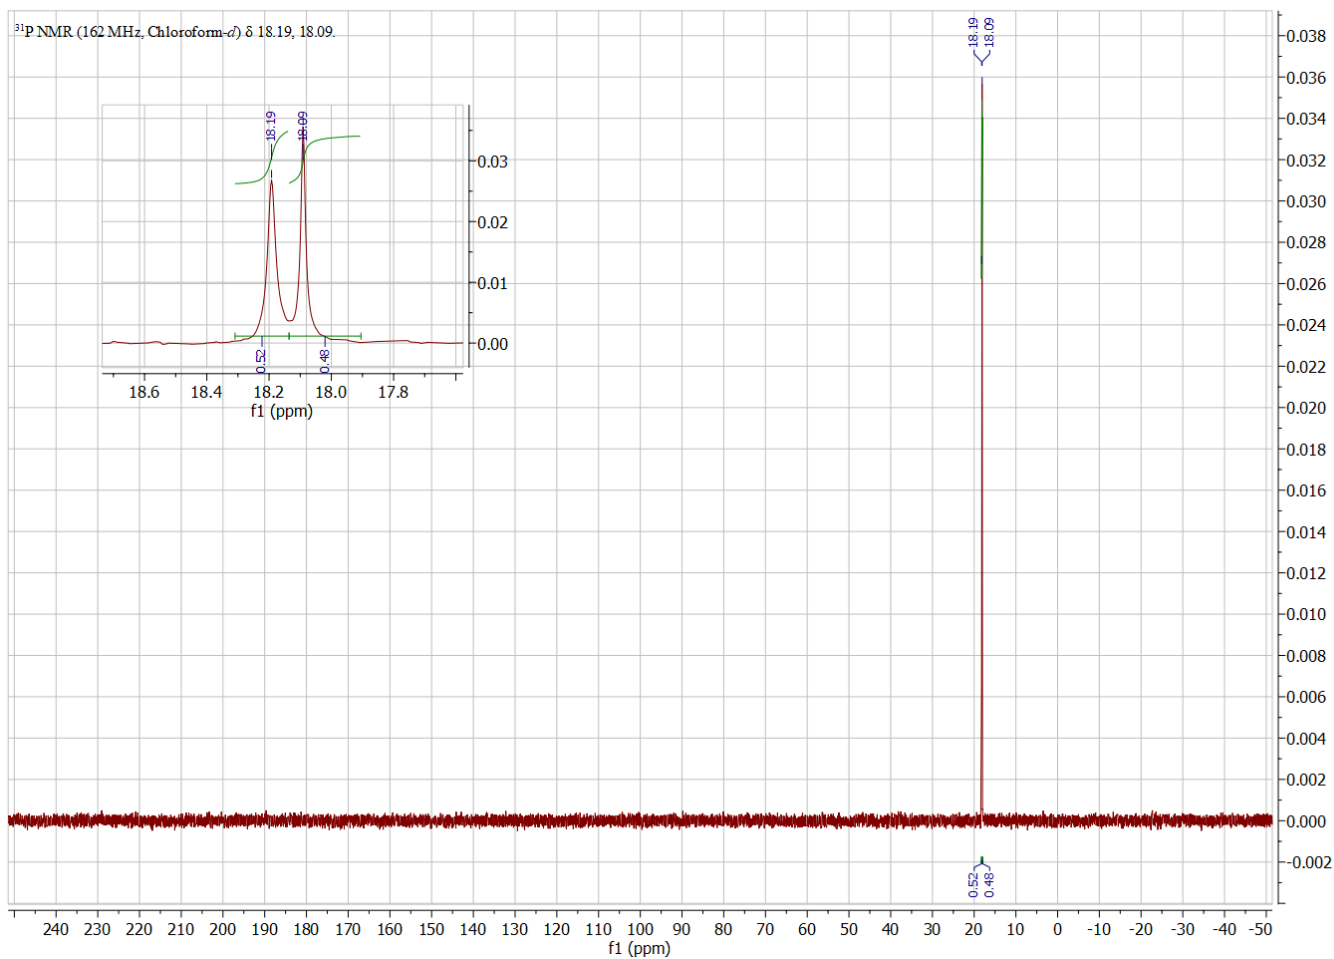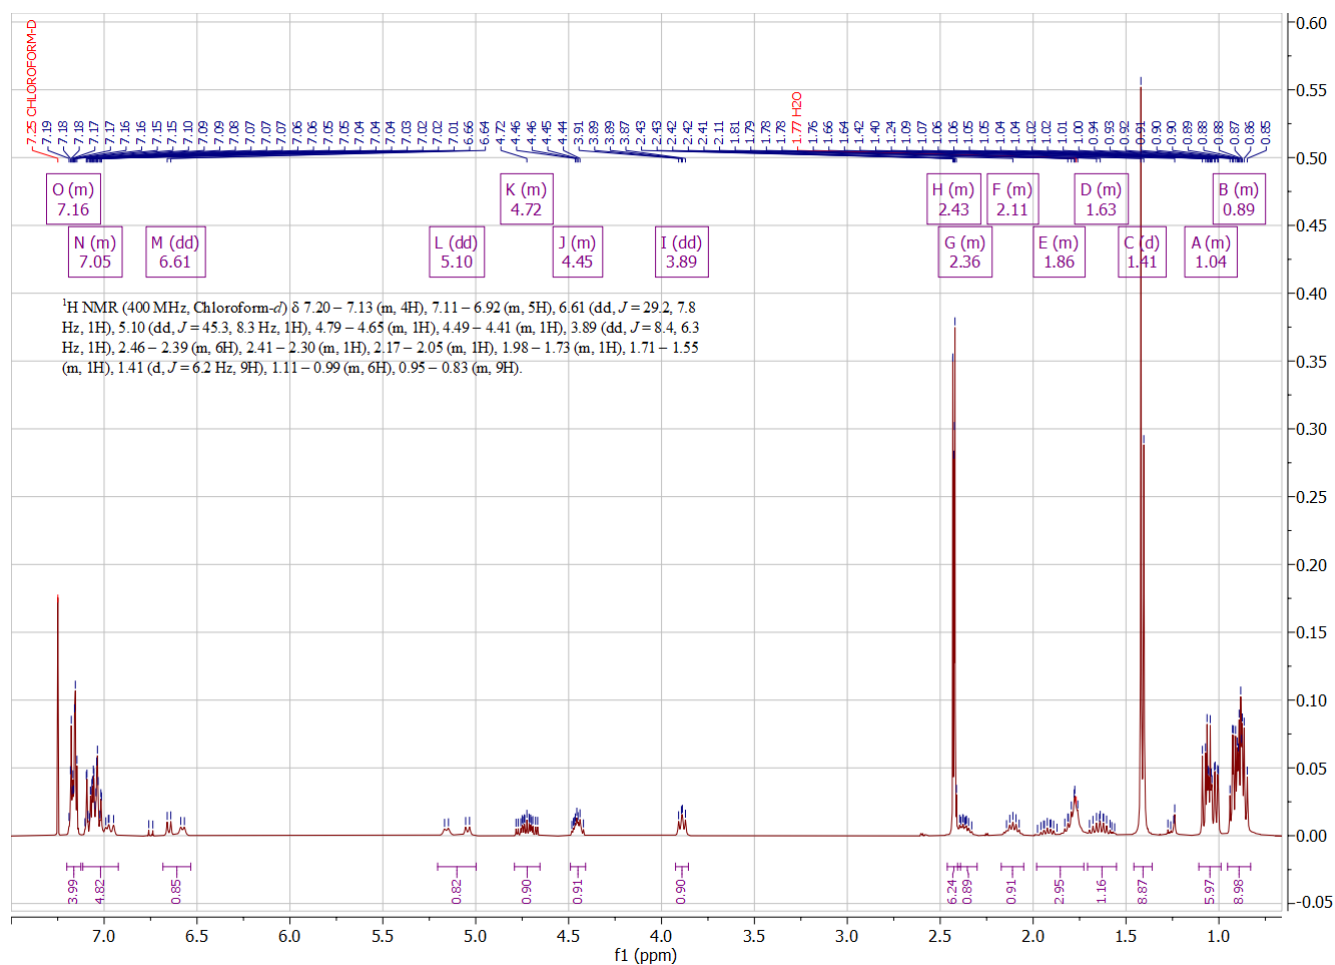



**(7) Boc-L-Val-D-Abu- Val<sup>P</sup>(OPh-4-SCH<sub>3</sub>)<sub>2</sub>**

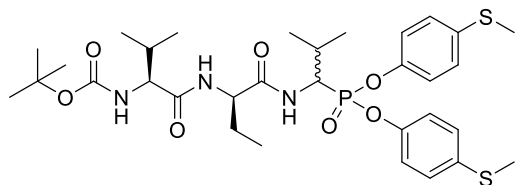

**Name:** *tert*-butyl ((2*S*)-1-(((2*R*)-1-((1-(bis(4-(methylthio)phenoxy)phosphoryl)-2-methylpropyl)amino)-1-oxobutan-2-yl)amino)-3-methyl-1-oxobutan-2-yl)carbamate

<sup>31</sup>P NMR (162 MHz, Chloroform-*d*) δ 18.19 (s, 43%), 18.06 (s, 57%).

<sup>1</sup>H NMR (400 MHz, Chloroform-*d*) δ 7.24 – 7.00 (m, 9H, 8xArH, NH), 6.75 (dd, *J* = 74.5, 7.7 Hz, 1H, NH), 5.18 (dd, *J* = 67.6, 8.5 Hz, 1H, NH), 4.79 – 4.64 (m, 1H, CHP), 4.53 – 4.42 (m, 1H, CH), 3.98 – 3.87 (m, 1H, CH), 2.47 – 2.41 (m, 6H, 2xSCH<sub>3</sub>), 2.41 – 2.32 (m, 1H, CH), 2.17 – 2.03 (m, 1H, CH), 2.00 – 1.71 (m, 1H, CH<sub>2</sub>), 1.68 – 1.52 (m, 1H, CH<sub>2</sub>), 1.40 (d, *J* = 5.9 Hz, 9H, Boc), 1.02 (dd, *J* = 22.6, 6.2 Hz, 6H, 2xCH<sub>3</sub>), 0.96 – 0.77 (m, 9H, 3xCH<sub>3</sub>).

**HRMS:** C<sub>32</sub>H<sub>48</sub>N<sub>3</sub>O<sub>7</sub>PS<sub>2</sub> [M+Na]<sup>+</sup> calc. 704.2569 found 704.2545

**HPLC:** purity >99%; retention time 18.547 and 18.677 min

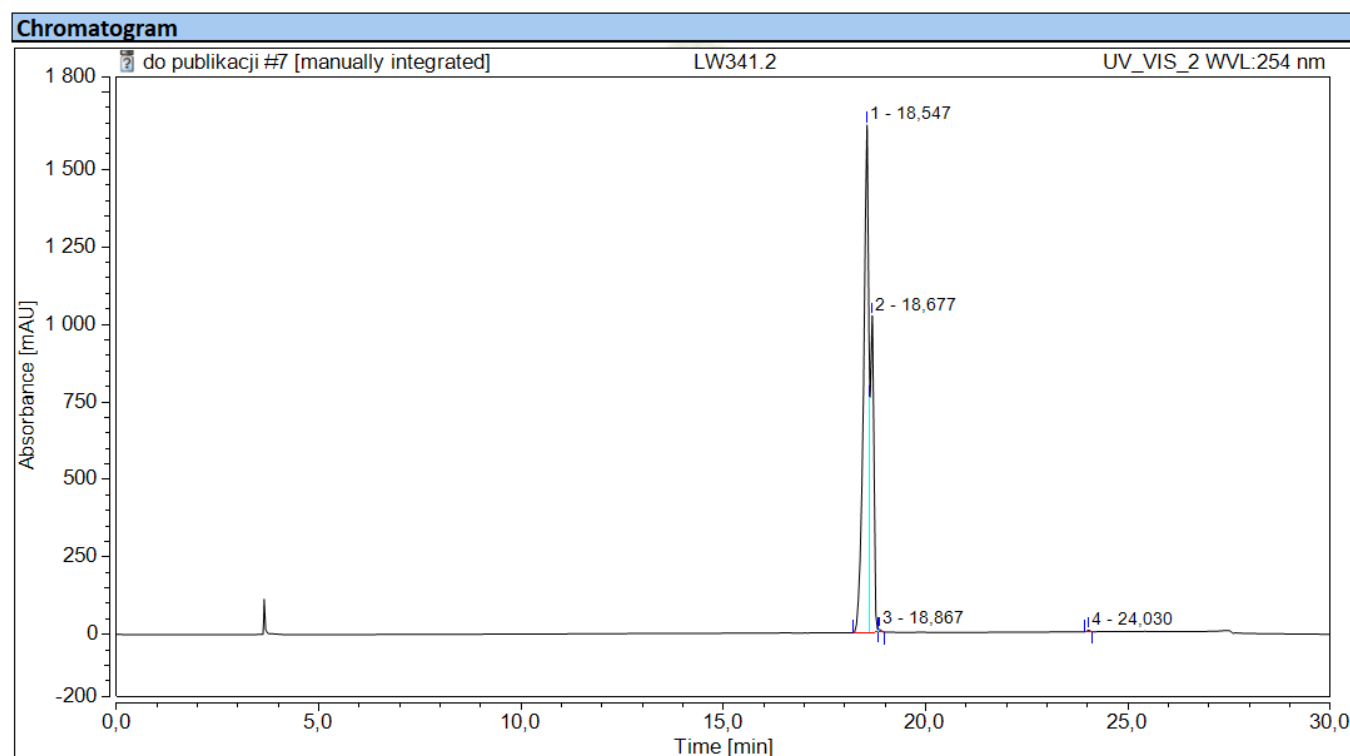

| Integration Results |           |                       |                 |                 |                    |                      |        |
|---------------------|-----------|-----------------------|-----------------|-----------------|--------------------|----------------------|--------|
| No.                 | Peak Name | Retention Time<br>min | Area<br>mAU*min | Height<br>mAU   | Relative Area<br>% | Relative Height<br>% | Amount |
| 1                   |           | 18,547                | 247,363         | 1637,453        | 70,98              | 61,23                | n.a.   |
| 2                   |           | 18,677                | 99,783          | 1021,828        | 28,63              | 38,21                | n.a.   |
| 3                   |           | 18,867                | 0,923           | 9,002           | 0,26               | 0,34                 | n.a.   |
| 4                   |           | 24,030                | 0,442           | 5,874           | 0,13               | 0,22                 | n.a.   |
| <b>Total:</b>       |           |                       | <b>348,511</b>  | <b>2674,157</b> | <b>100,00</b>      | <b>100,00</b>        |        |

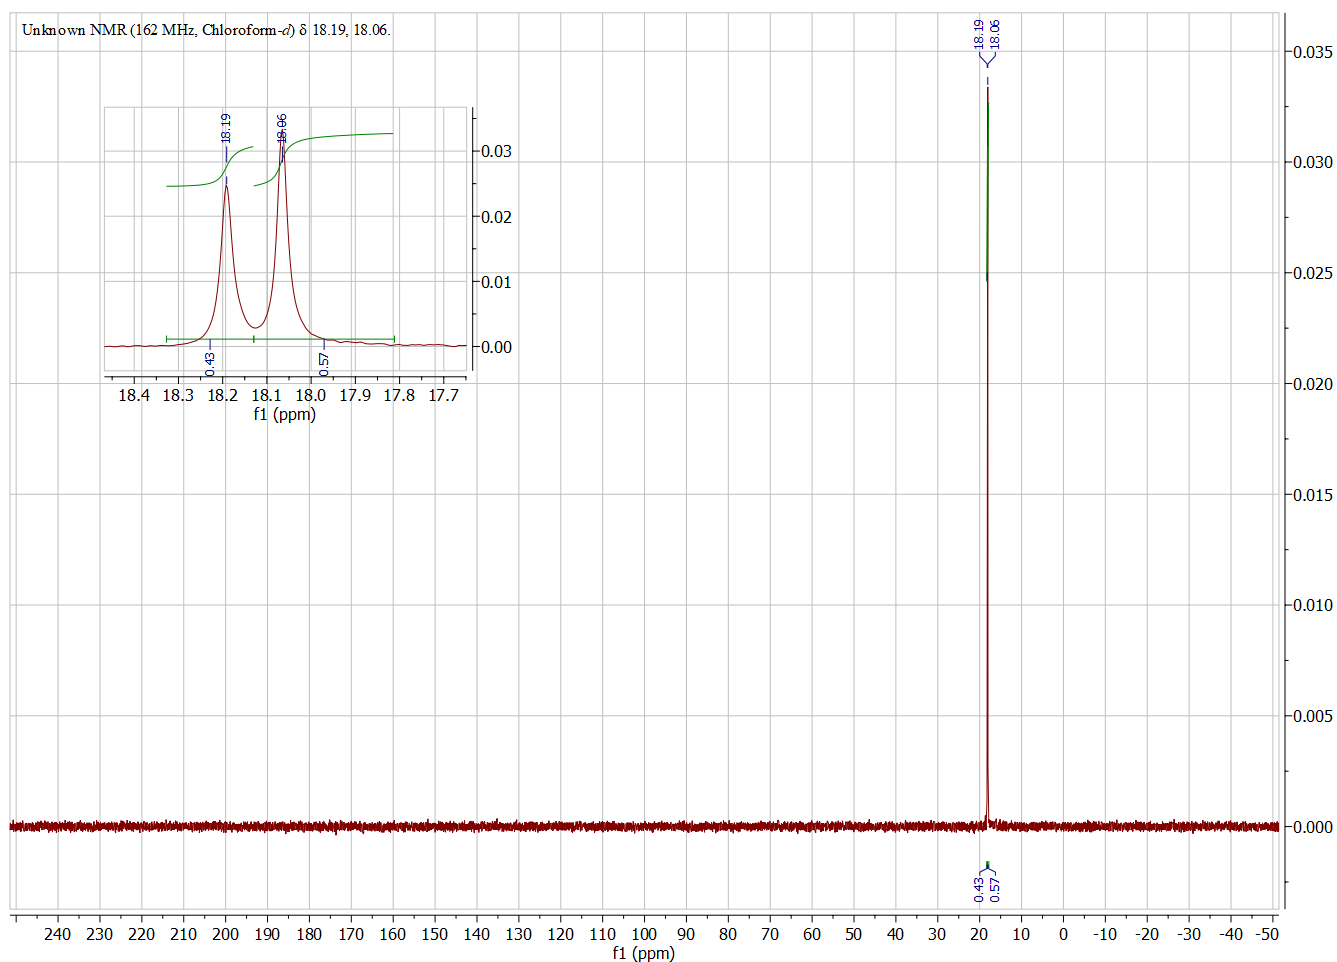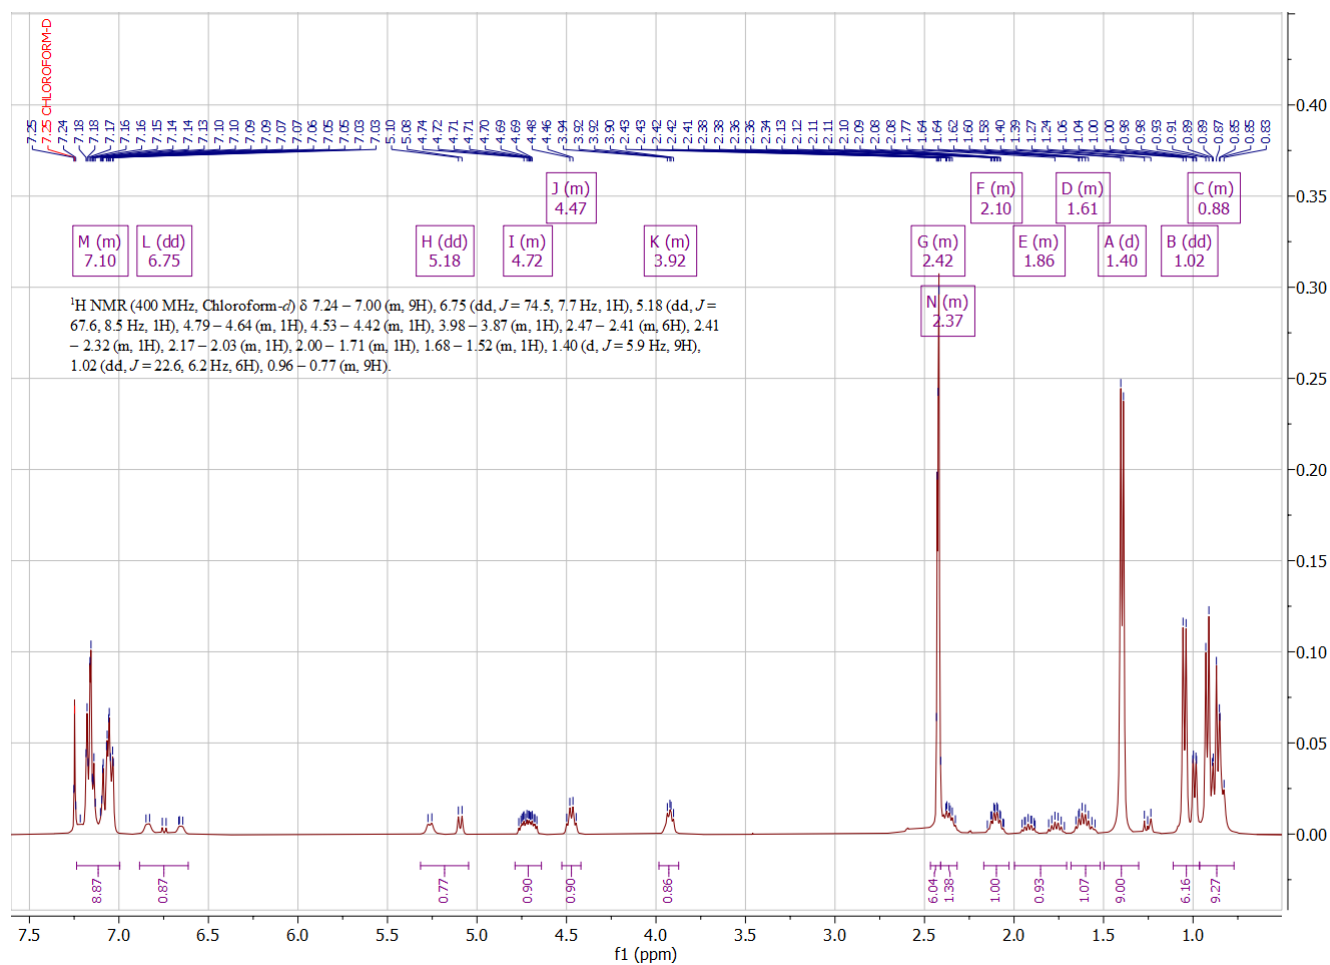

(8) Boc-L-Val-L-Nva- Val<sup>P</sup>(OPh-4-SCH<sub>3</sub>)<sub>2</sub>

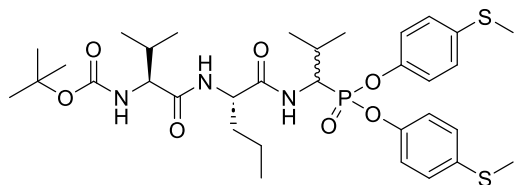

**Name:** *tert*-butyl ((2S)-1-(((2S)-1-((1-(bis(4-(methylthio)phenoxy)phosphoryl)-2-methylpropyl)amino)-1-oxopentan-2-yl)amino)-3-methyl-1-oxobutan-2-yl)carbamate

<sup>31</sup>P NMR (162 MHz, Chloroform-d) δ 18.17 (s, 51%), 18.02 (s, 49%).

<sup>1</sup>H NMR (400 MHz, Chloroform-d) δ 7.21 – 6.98 (m, 9H, 8xArH, NH), 6.64 (dd, J = 27.2, 7.9 Hz, 1H, NH), 5.18 (dd, J = 64.3, 8.5 Hz, 1H, NH), 4.81 – 4.65 (m, 1H, CHP), 4.57 – 4.48 (m, 1H, CH), 3.94 – 3.82 (m, 1H, CH), 2.42 (d, J = 3.6 Hz, 6H, 2xSCH<sub>3</sub>), 2.40 – 2.30 (m, 1H, CH), 2.15 – 2.04 (m, 1H, CH), 1.88 – 1.48 (m, 2H, CH<sub>2</sub>), 1.41 (d, J = 5.4 Hz, 9H, Boc), 1.35 – 1.20 (m, 2H, CH<sub>2</sub>), 1.10 – 0.98 (m, 6H, 2xCH<sub>3</sub>), 0.93 – 0.77 (m, 9H, 3xCH<sub>3</sub>).

**HRMS:** C<sub>33</sub>H<sub>50</sub>N<sub>3</sub>O<sub>7</sub>PS<sub>2</sub> [M+Na]<sup>+</sup> calc. 718.2725 found 718.2728

**HPLC:** purity >99%; retention time 18.913 and 19.127 min

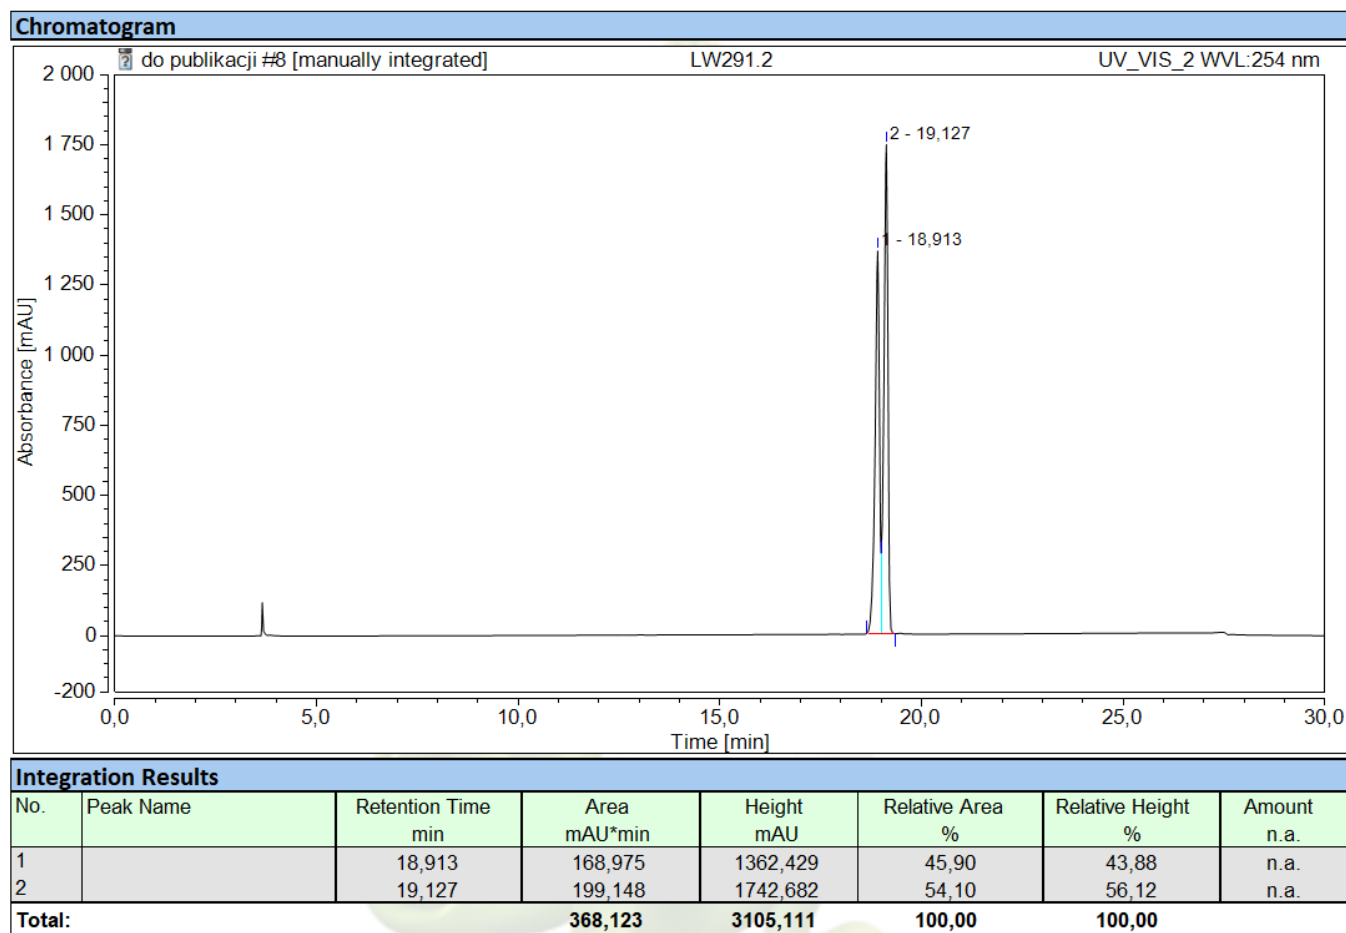

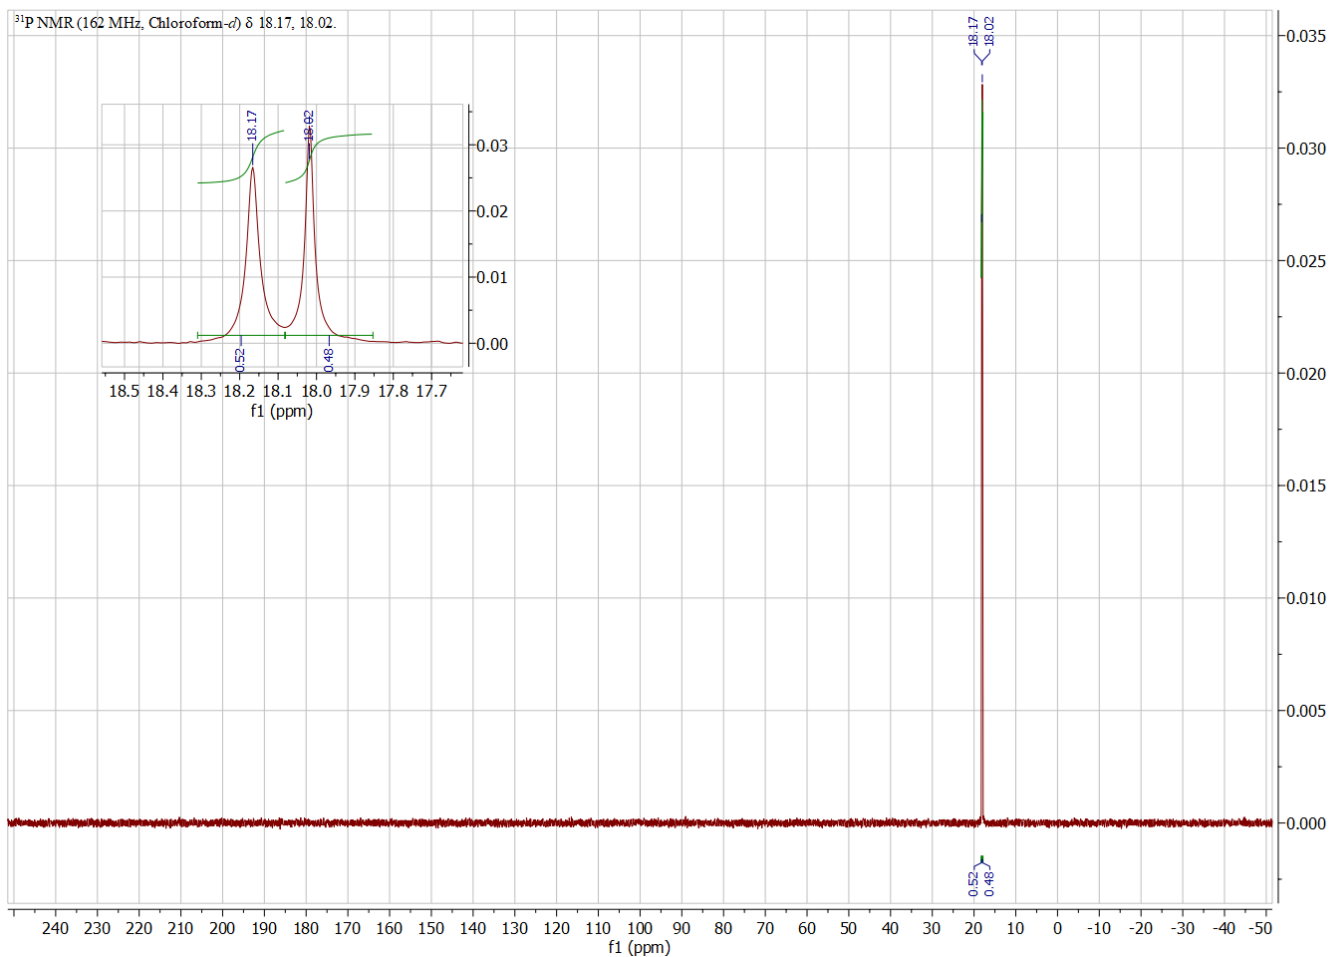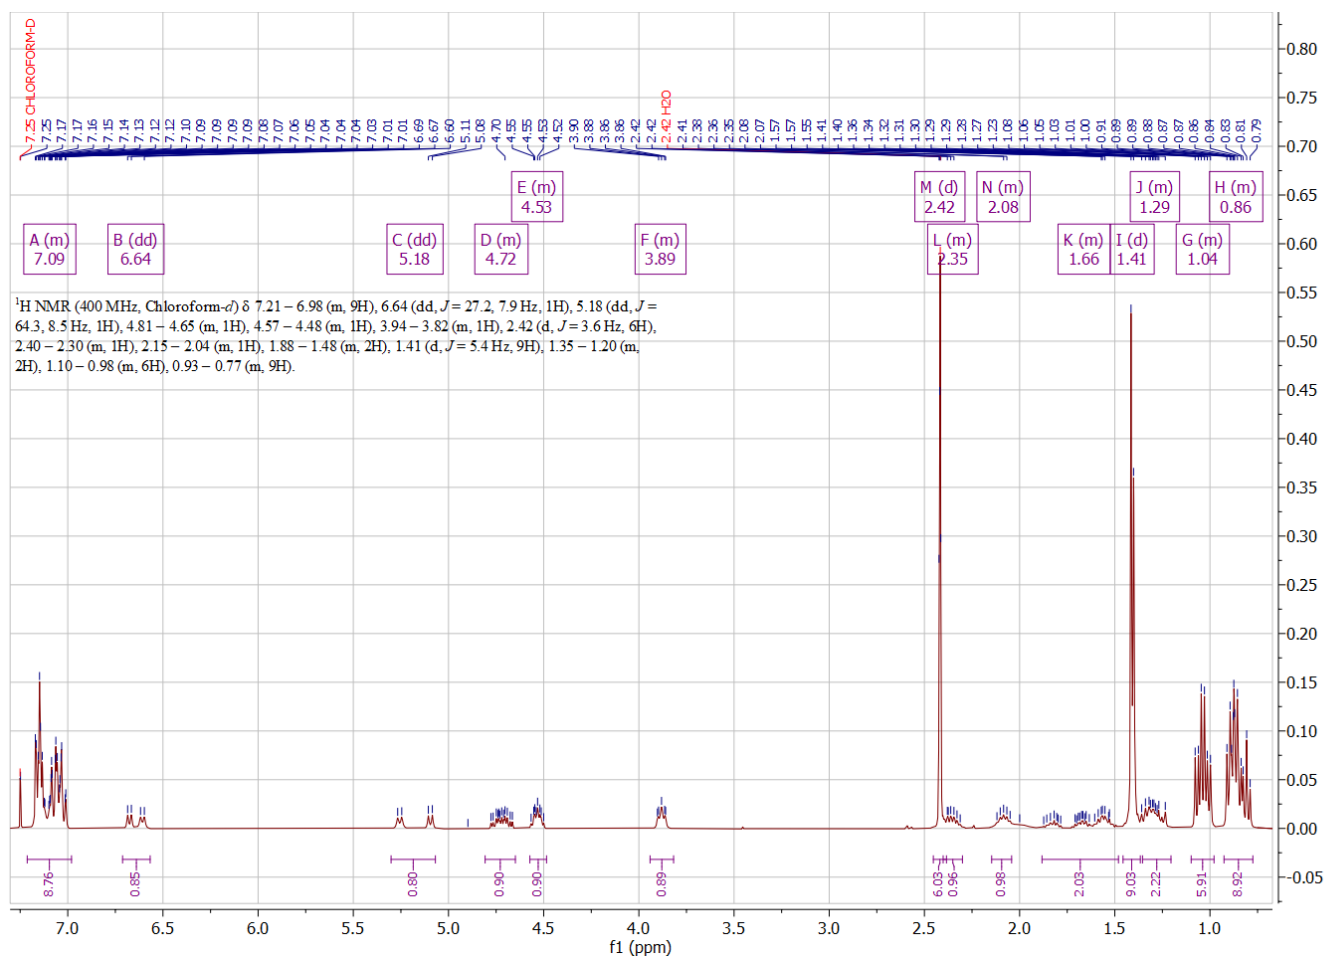

**(9) Boc-L-Val-D-Nva- Val<sup>P</sup>(OPh-4-SCH<sub>3</sub>)<sub>2</sub>**

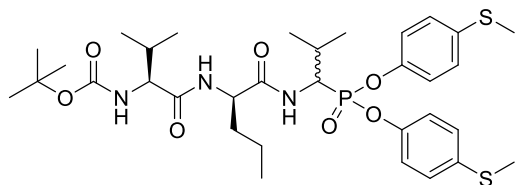

**Name:** *tert*-butyl ((2*S*)-1-(((2*R*)-1-((1-(bis(4-(methylthio)phenoxy)phosphoryl)-2-methylpropyl)amino)-1-oxopentan-2-yl)amino)-3-methyl-1-oxobutan-2-yl)carbamate

<sup>31</sup>P NMR (162 MHz, Chloroform-*d*) δ 18.31 (s, 47%), 18.07 (s, 53%).

<sup>1</sup>H NMR (400 MHz, Chloroform-*d*) δ 7.22 – 7.14 (m, 4H, 4xArH), 7.12 – 7.02 (m, 4H, 4xArH), 7.03 – 6.93 (m, 1H, NH), 6.56 (dd, *J* = 54.4, 8.0 Hz, 1H, NH), 5.06 (dd, *J* = 45.0, 8.3 Hz, 1H, NH), 4.77 – 4.65 (m, 1H, CHP), 4.51 – 4.40 (m, 1H, CH), 3.95 – 3.87 (m, 1H, CH), 2.43 (dd, *J* = 2.2, 0.8 Hz, 6H, 3xSCH<sub>3</sub>), 2.41 – 2.30 (m, 1H, CH), 2.19 – 2.06 (m, 1H, CH), 1.85 – 1.66 (m, 1H, CH<sub>2</sub>), 1.63 – 1.47 (m, 1H, CH<sub>2</sub>), 1.40 (d, *J* = 6.9 Hz, 9H, Boc), 1.36 – 1.22 (m, 2H, CH<sub>2</sub>), 1.10 – 0.97 (m, 6H, 2xCH<sub>3</sub>), 0.96 – 0.77 (m, 9H, 3xCH<sub>3</sub>).

**HRMS:** C<sub>33</sub>H<sub>50</sub>N<sub>3</sub>O<sub>7</sub>PS<sub>2</sub> [M+Na]<sup>+</sup> calc. 718.2725 found 718.2706

**HPLC:** purity >99%; retention time 19.023 and 19.203 min

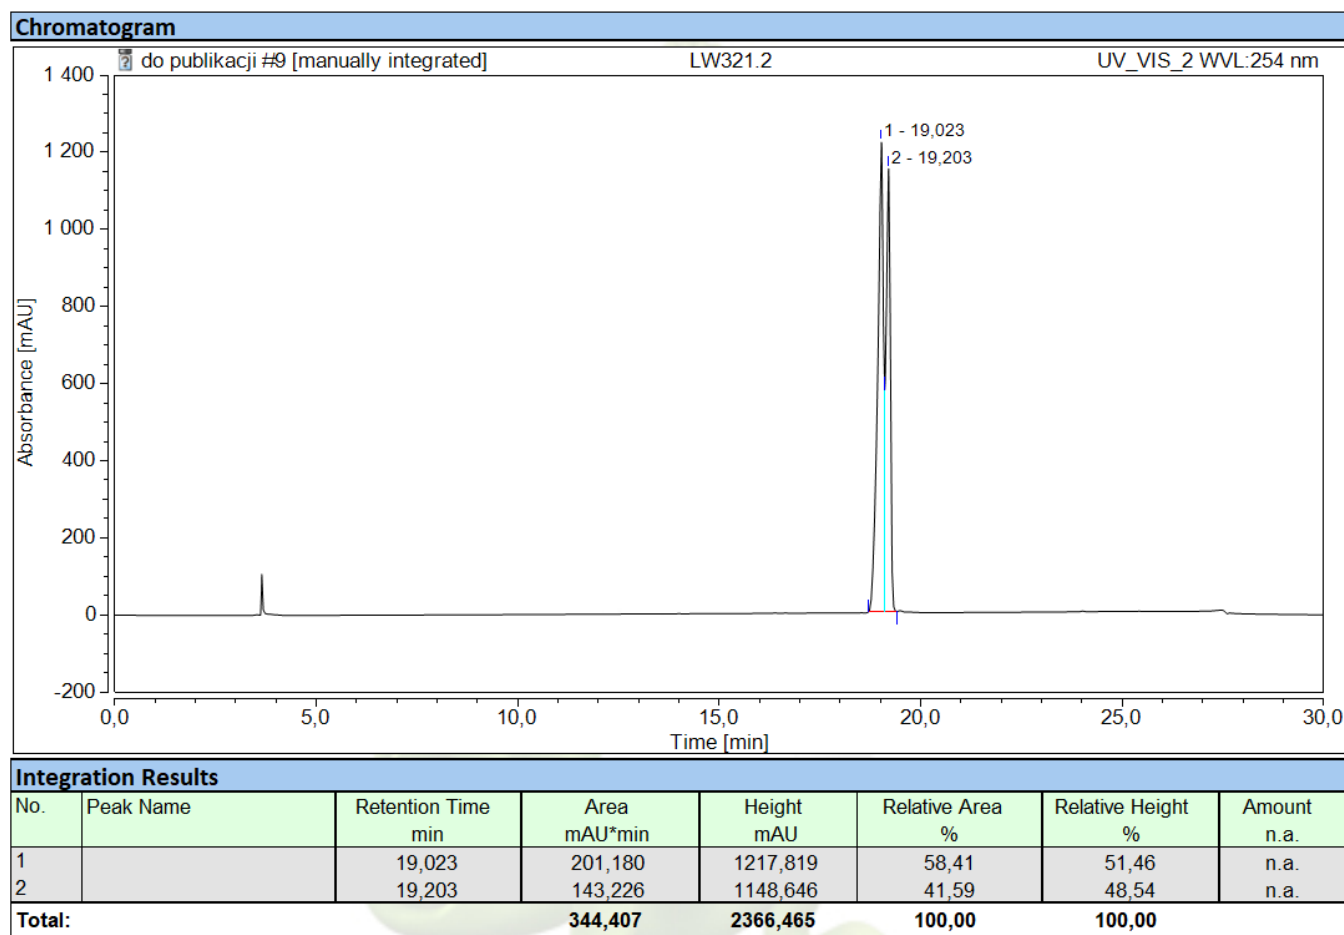

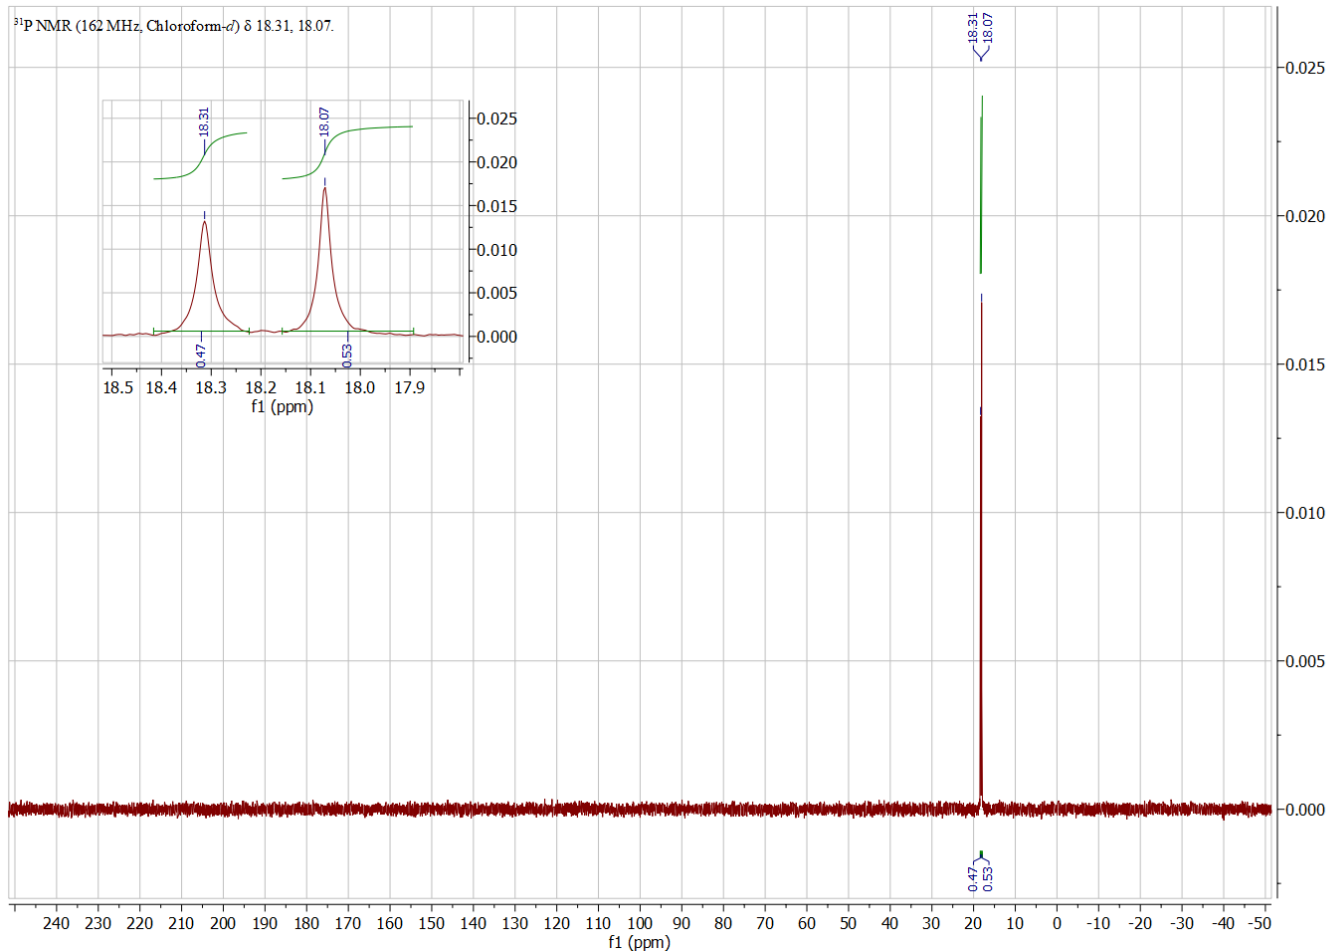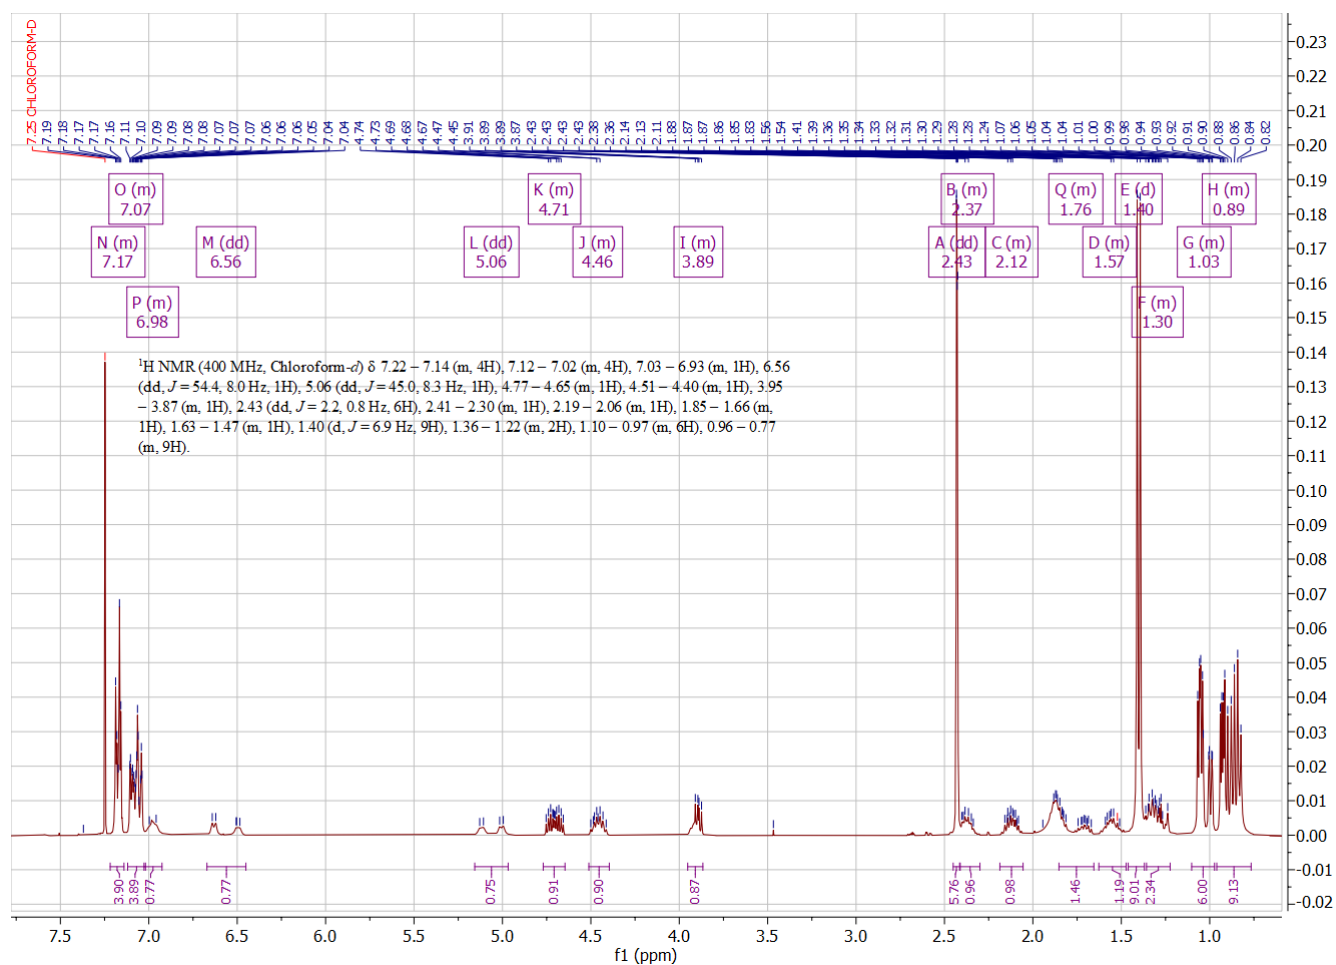

**(10) Boc-L-Val-L-Val-Val<sup>P</sup>(OPh-4-SCH<sub>3</sub>)<sub>2</sub>**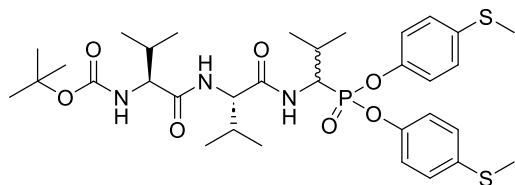

**Name:** *tert*-butyl ((2*S*)-1-(((2*S*)-1-((1-(bis(4-(methylthio)phenoxy)phosphoryl)-2-methylpropyl)amino)-3-methyl-1-oxobutan-2-yl)amino)-3-methyl-1-oxobutan-2-yl)carbamate

<sup>31</sup>P NMR (162 MHz, Chloroform-*d*) δ 18.36 (s).

<sup>1</sup>H NMR (400 MHz, Chloroform-*d*) δ 7.21 – 7.13 (m, 4H, 4xArH), 7.11 – 7.00 (m, 4H, 4xArH), 6.92 – 6.80 (m, 1H, NH), 6.62 (dd, *J* = 22.7, 8.5 Hz, 1H, NH), 5.09 (dd, *J* = 64.8, 8.1 Hz, 1H, NH), 4.80 – 4.68 (m, 1H, CHP), 4.42 – 4.31 (m, 1H, CH), 3.89 – 3.83 (m, 1H, CH), 2.45 – 2.41 (m, 6H, 2xSCH<sub>3</sub>), 2.41 – 2.31 (m, 1H, CH), 2.31 – 2.07 (m, 2H, 2xCH), 1.41 (d, *J* = 9.8 Hz, 9H, Boc), 1.12 – 0.84 (m, 18H, 6xCH<sub>3</sub>).

**HRMS:** C<sub>33</sub>H<sub>50</sub>N<sub>3</sub>O<sub>7</sub>PS<sub>2</sub> [M+Na]<sup>+</sup> calc. 718.2725 found 718.2733

**HPLC:** purity >99%; retention time 18.857 and 19.063 min

**Chromatogram**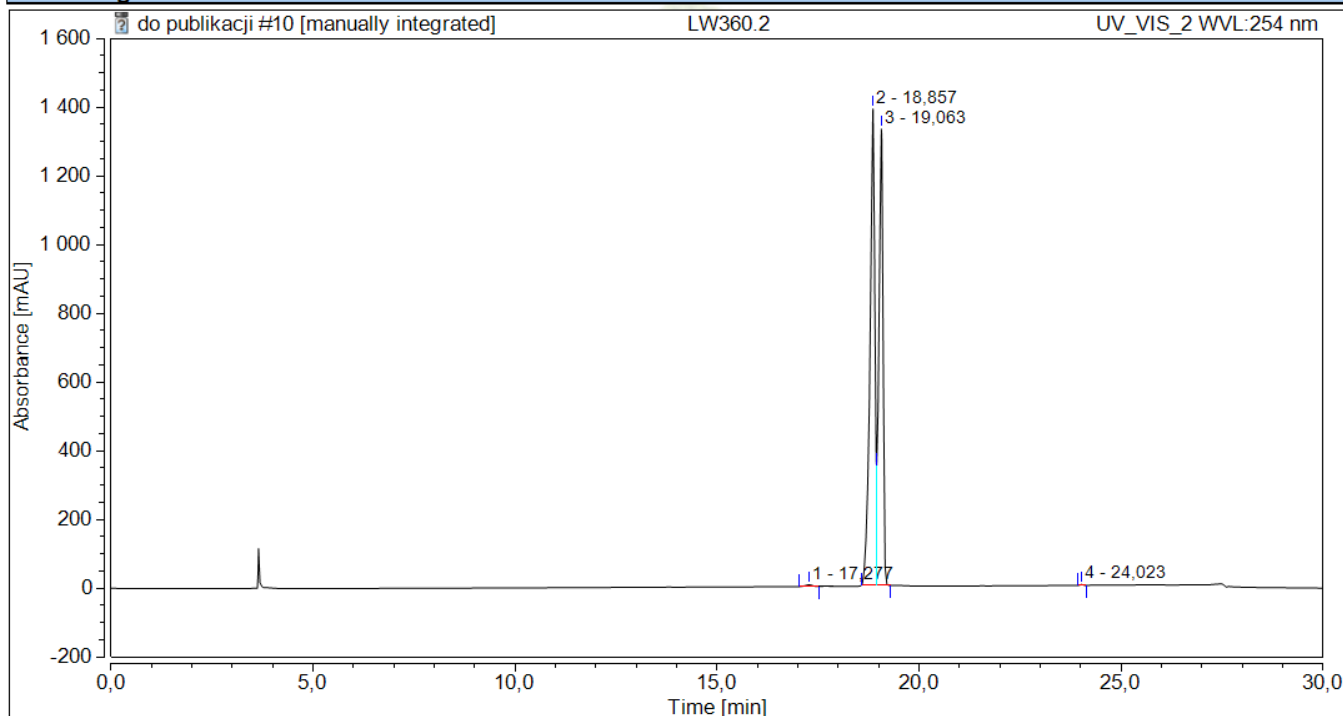**Integration Results**

| No.           | Peak Name | Retention Time<br>min | Area<br>mAU*min | Height<br>mAU   | Relative Area<br>% | Relative Height<br>% | Amount<br>n.a. |
|---------------|-----------|-----------------------|-----------------|-----------------|--------------------|----------------------|----------------|
| 1             |           | 17,277                | 1,007           | 5,017           | 0,28               | 0,18                 | n.a.           |
| 2             |           | 18,857                | 195,298         | 1386,650        | 55,09              | 50,93                | n.a.           |
| 3             |           | 19,063                | 158,019         | 1328,209        | 44,57              | 48,78                | n.a.           |
| 4             |           | 24,023                | 0,213           | 2,824           | 0,06               | 0,10                 | n.a.           |
| <b>Total:</b> |           |                       | <b>354,538</b>  | <b>2722,699</b> | <b>100,00</b>      | <b>100,00</b>        |                |

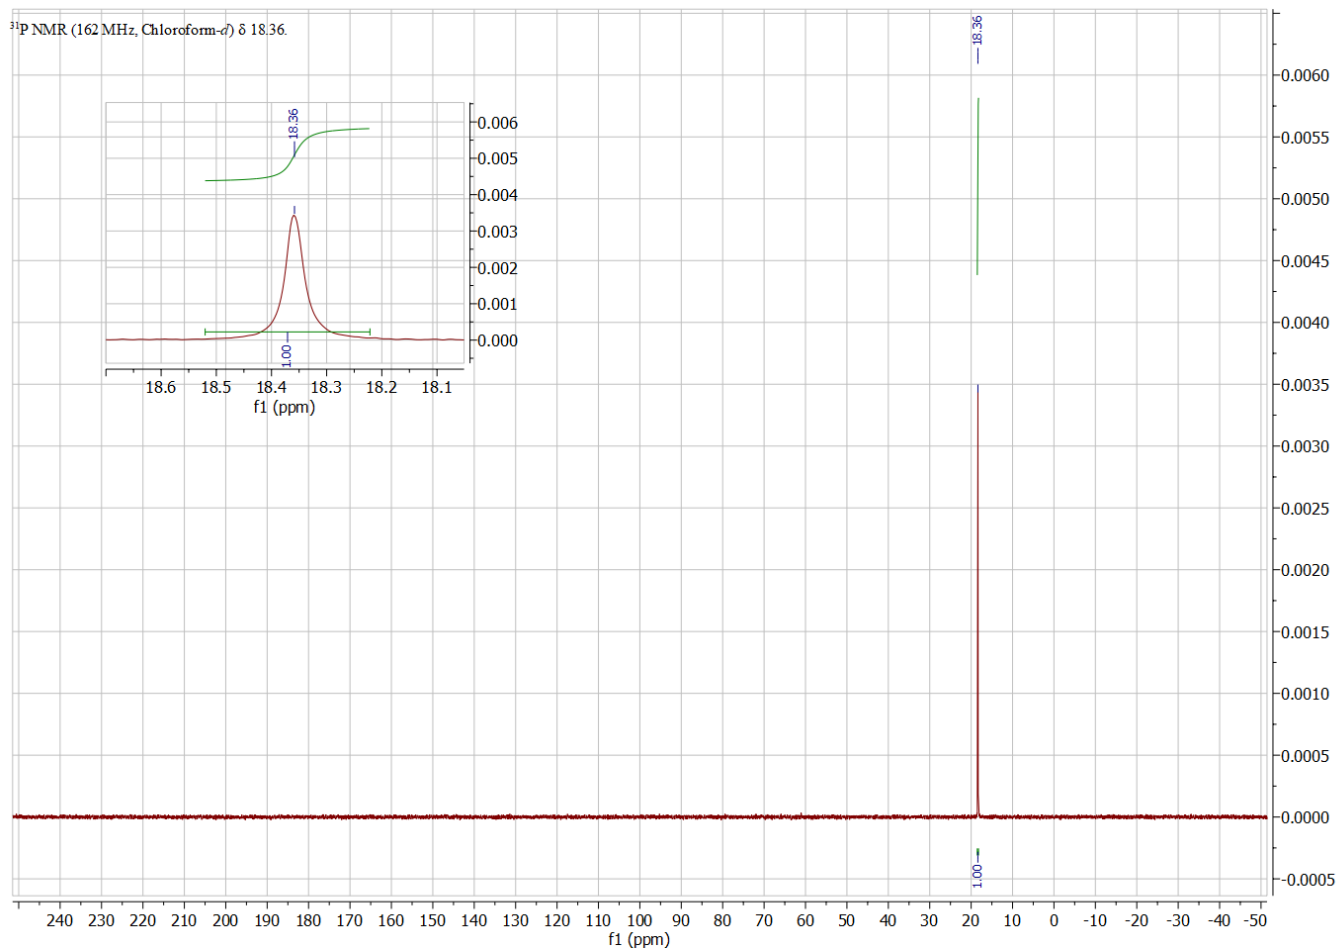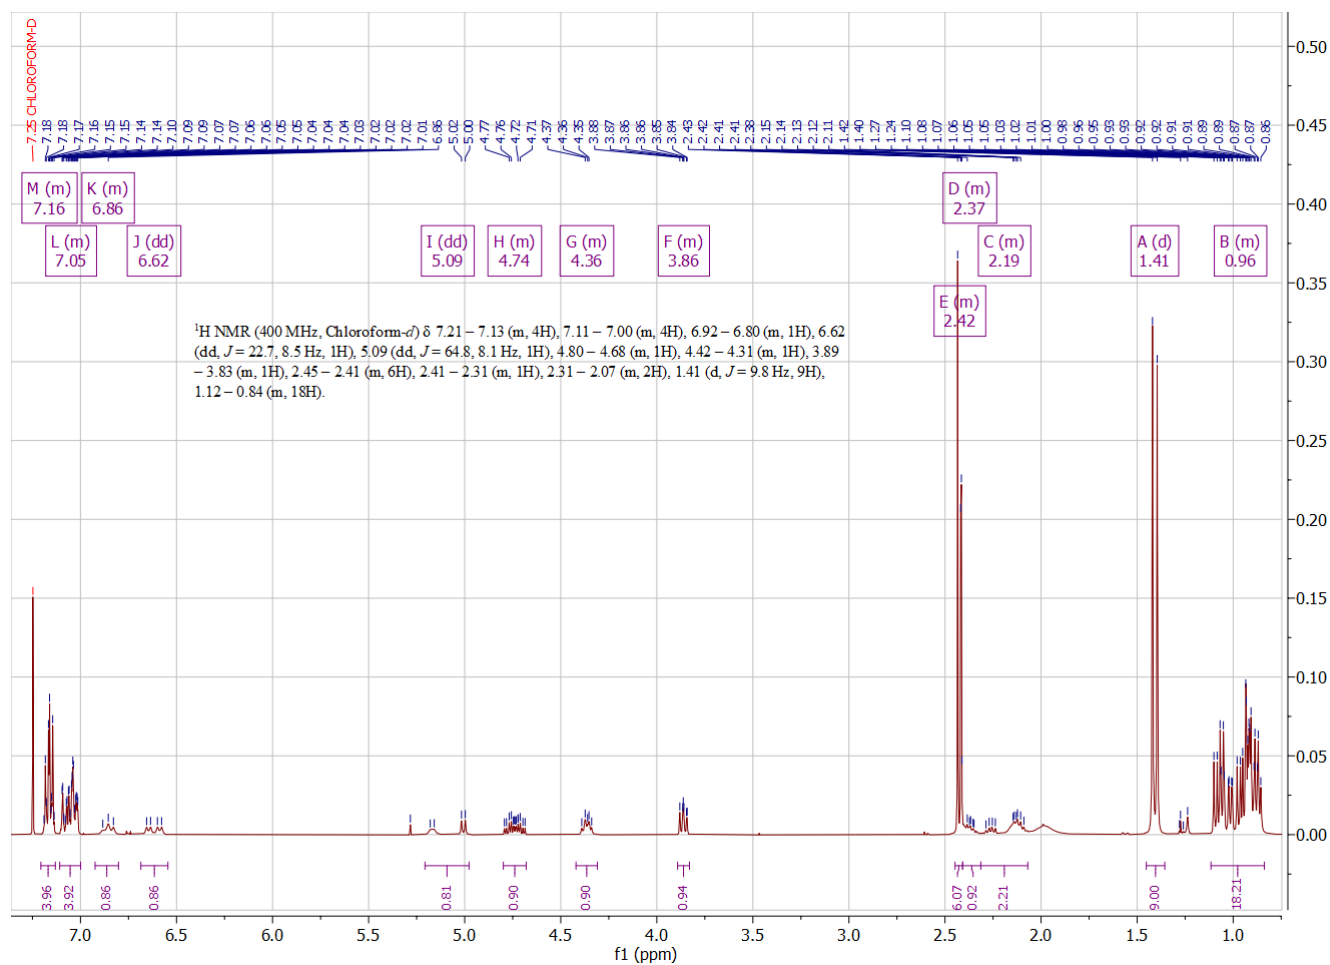



**(11) Boc-L-Val-D-Val- Val<sup>P</sup>(OPh-4-SCH<sub>3</sub>)<sub>2</sub>**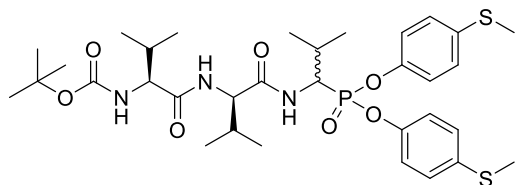

**Name:** *tert*-butyl ((2S)-1-(((2R)-1-((1-(bis(4-(methylthio)phenoxy)phosphoryl)-2-methylpropyl)amino)-3-methyl-1-oxobutan-2-yl)amino)-3-methyl-1-oxobutan-2-yl)carbamate

<sup>31</sup>P NMR (162 MHz, Chloroform-d) δ 18.32 (s, 44%), 18.30 (s, 56%).

<sup>1</sup>H NMR (400 MHz, Chloroform-d) δ 7.20 – 7.12 (m, 4H, 4xArH), 7.10 – 7.00 (m, 4H, 4xArH), 6.97 (dd, J = 15.0, 6.7 Hz, 1H, NH), 6.84 – 6.62 (m, 1H, NH), 5.17 (dd, J = 98.0, 8.2 Hz, 1H, NH), 4.80 – 4.66 (m, 1H, CHP), 4.44 – 4.36 (m, 1H, CH), 3.95 (dd, J = 8.1, 5.6 Hz, 1H, CH), 2.47 – 2.40 (m, 6H, 2xSCH<sub>3</sub>), 2.40 – 2.30 (m, 1H, CH), 2.30 – 2.02 (m, 2H, 2xCH), 1.40 (d, J = 5.7 Hz, 9H, Boc), 1.11 – 0.73 (m, 18H, 6xCH<sub>3</sub>).

**HRMS:** C<sub>33</sub>H<sub>50</sub>N<sub>3</sub>O<sub>7</sub>PS<sub>2</sub> [M+Na]<sup>+</sup> calc. 718.2725 found 718.2703

**HPLC:** purity >99%; retention time 18.963 and 19.170 min

**Chromatogram**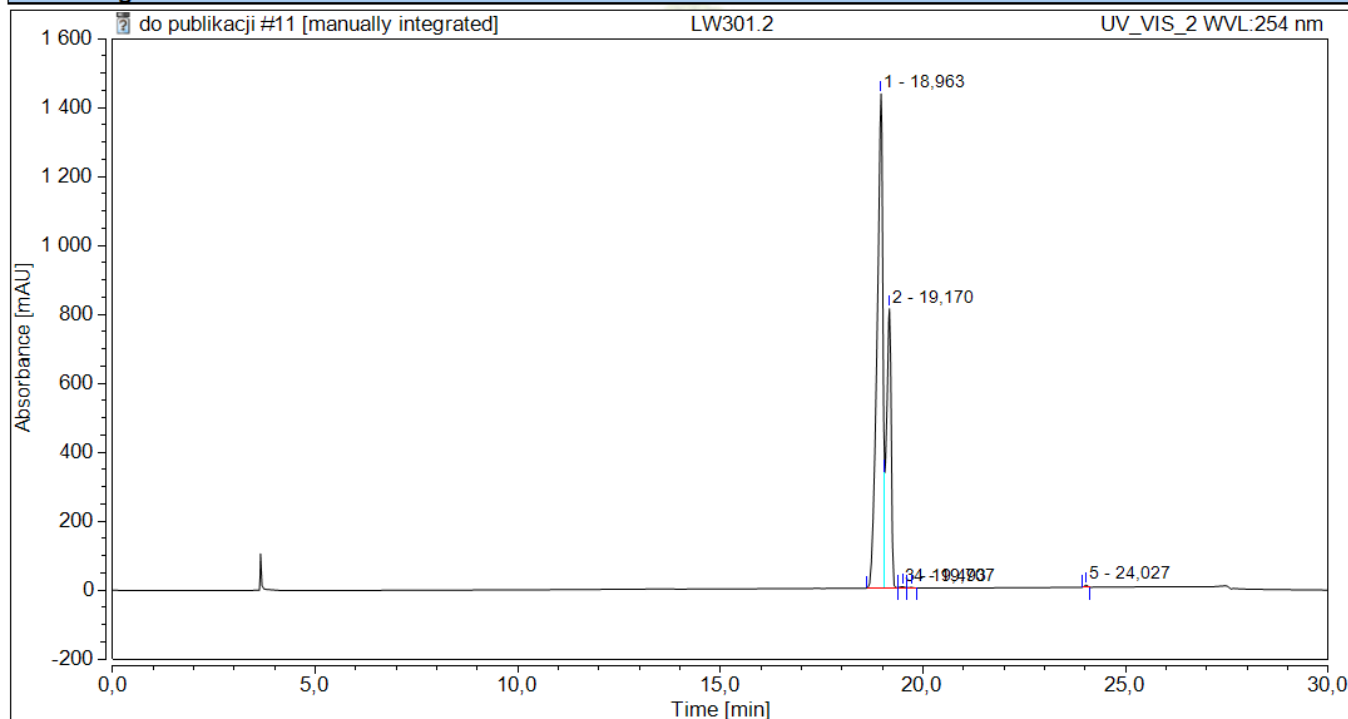**Integration Results**

| No.           | Peak Name | Retention Time min | Area mAU*min   | Height mAU      | Relative Area % | Relative Height % | Amount n.a. |
|---------------|-----------|--------------------|----------------|-----------------|-----------------|-------------------|-------------|
| 1             |           | 18,963             | 238,203        | 1432,966        | 69,31           | 63,57             | n.a.        |
| 2             |           | 19,170             | 104,330        | 809,486         | 30,36           | 35,91             | n.a.        |
| 3             |           | 19,493             | 0,367          | 3,179           | 0,11            | 0,14              | n.a.        |
| 4             |           | 19,707             | 0,174          | 1,542           | 0,05            | 0,07              | n.a.        |
| 5             |           | 24,027             | 0,585          | 7,043           | 0,17            | 0,31              | n.a.        |
| <b>Total:</b> |           |                    | <b>343,659</b> | <b>2254,215</b> | <b>100,00</b>   | <b>100,00</b>     |             |

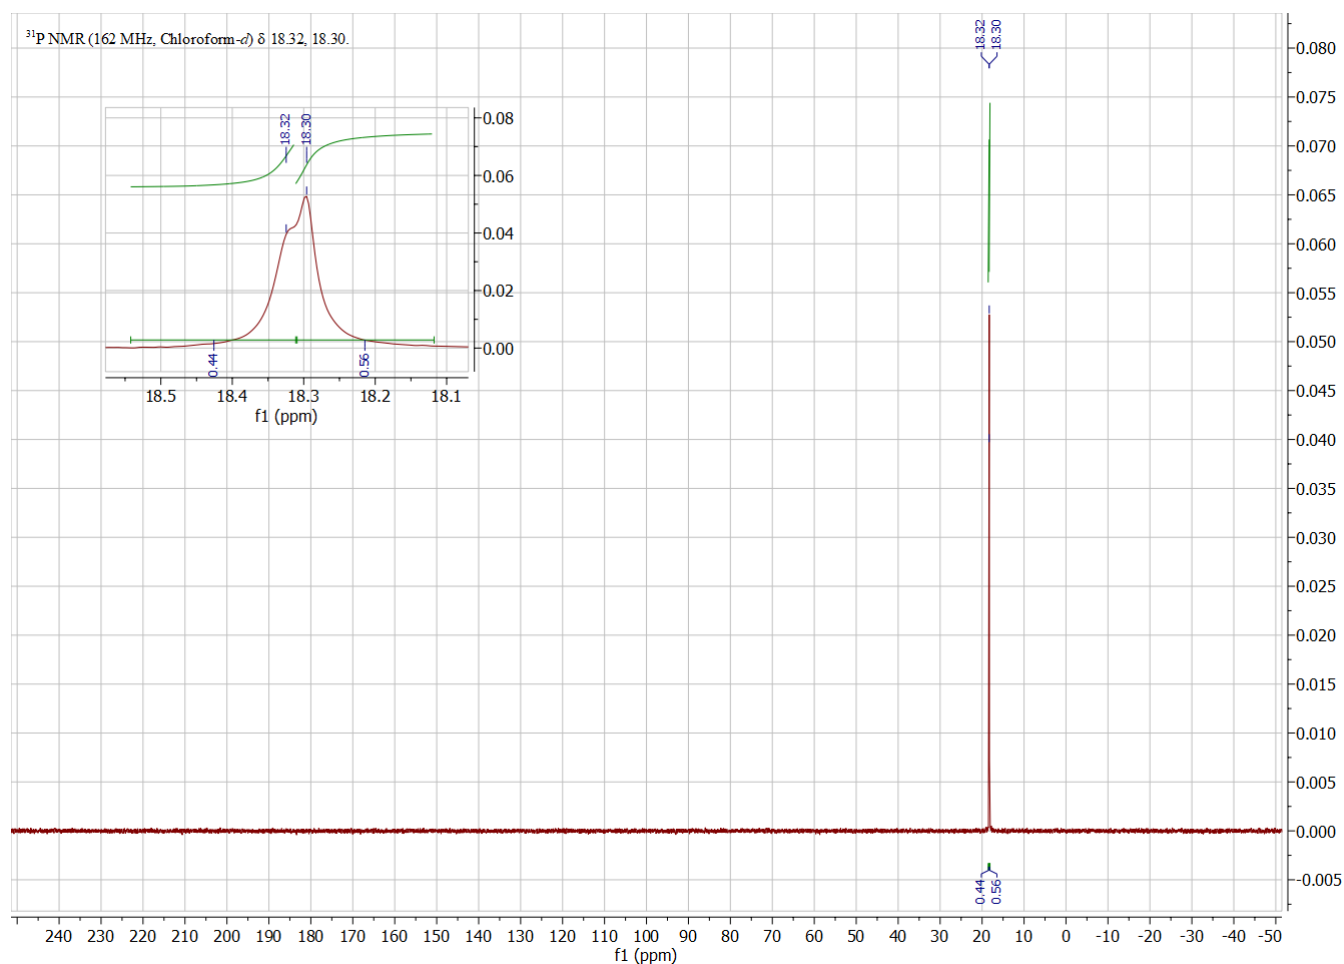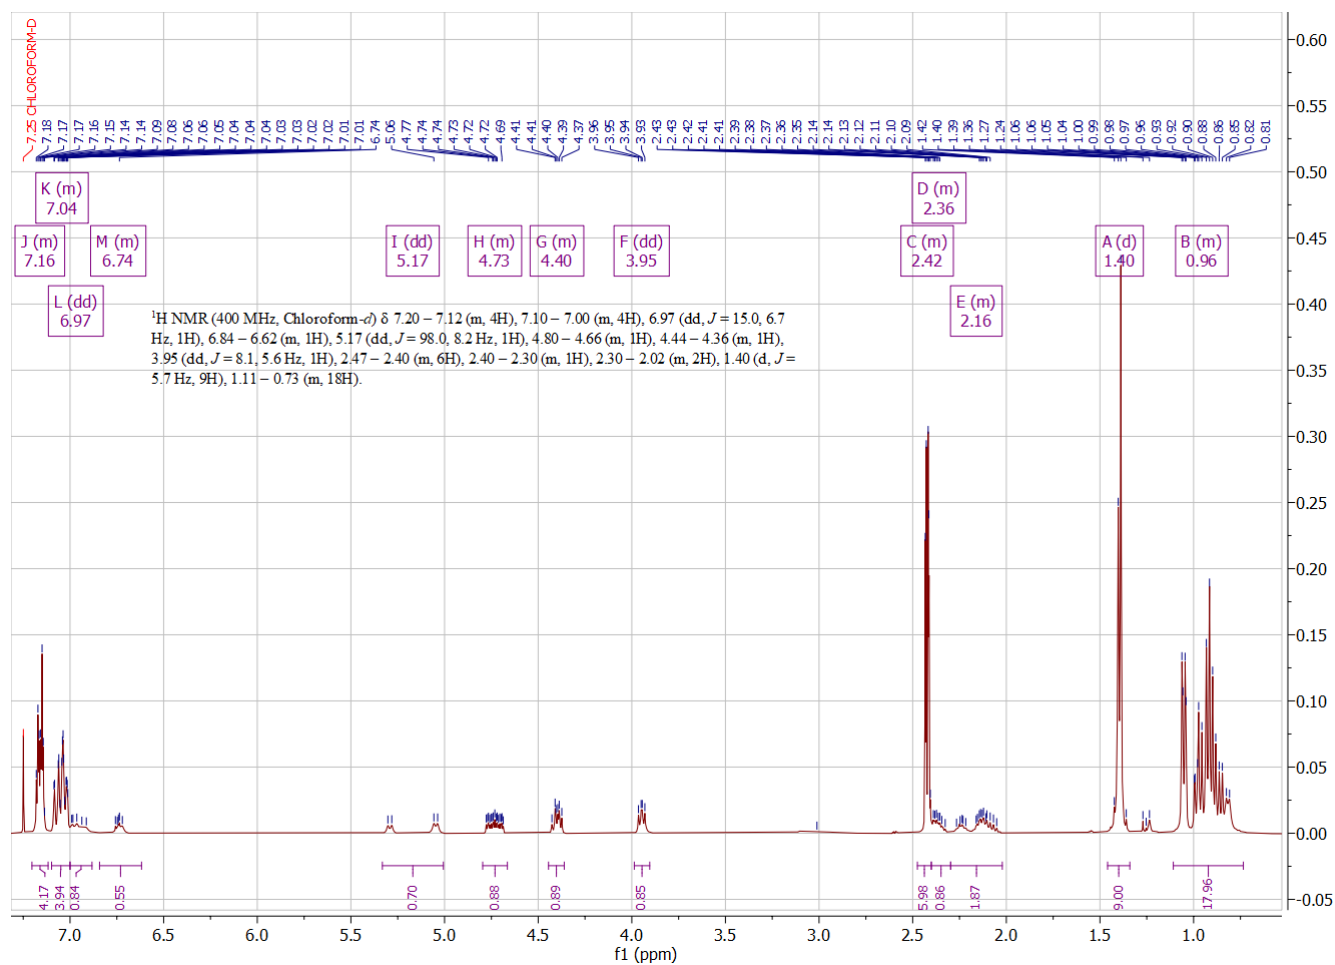

**(12) Boc-L-Val-L-Tle- Val<sup>P</sup>(OPh-4-SCH<sub>3</sub>)<sub>2</sub>**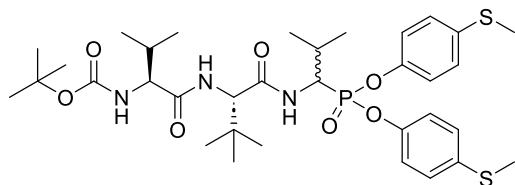

**Name:** *tert*-butyl ((2*S*)-1-(((2*S*)-1-((1-(bis(4-(methylthio)phenoxy)phosphoryl)-2-methylpropyl)amino)-3,3-dimethyl-1-oxobutan-2-yl)amino)-3-methyl-1-oxobutan-2-yl)carbamate

<sup>31</sup>P NMR (162 MHz, Chloroform-*d*) δ 18.54 (s, 61%), 18.51 (s, 39%).

<sup>1</sup>H NMR (400 MHz, Chloroform-*d*) δ 7.22 – 6.90 (m, 9H, 8xArH, NH), 6.62 (d, *J* = 9.3 Hz, 1H, NH), 5.19 (dd, *J* = 133.0, 8.3 Hz, 1H, NH), 4.84 – 4.68 (m, 1H, CHP), 4.43 (dd, *J* = 69.9, 9.0 Hz, 1H, CH), 3.89 – 3.79 (m, 1H, CH), 2.45 – 2.40 (m, 6H, 2xSCH<sub>3</sub>), 2.40 – 2.29 (m, 1H, CH), 2.16 – 2.00 (m, 1H, CH), 1.40 (d, *J* = 7.1 Hz, 9H, Boc), 1.13 – 0.97 (m, 15H, 5xCH<sub>3</sub>), 0.92 – 0.78 (m, 6H, 2xCH<sub>3</sub>).

**HRMS:** C<sub>34</sub>H<sub>52</sub>N<sub>3</sub>O<sub>7</sub>PS<sub>2</sub> [M+Na]<sup>+</sup> calc. 732.2882 found 732.2848

**HPLC:** purity >98%; retention time 19.503 and 19.613 min

**Chromatogram**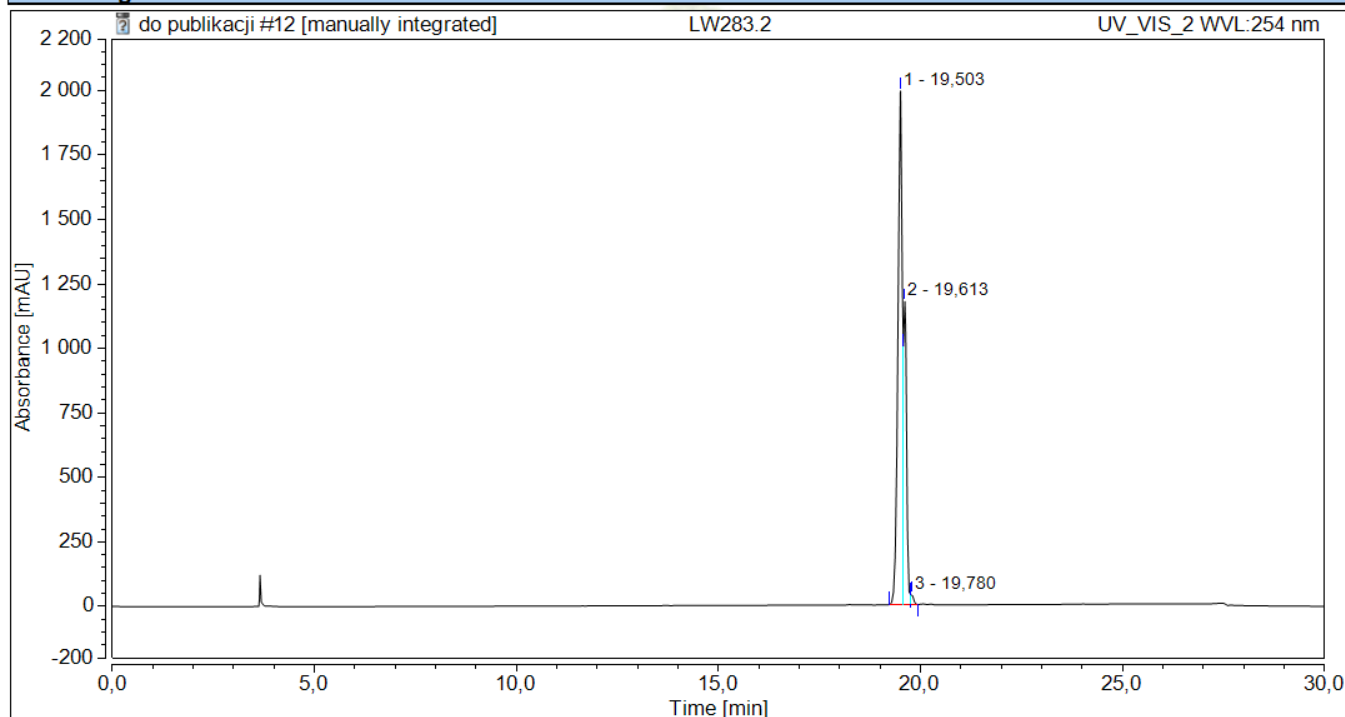**Integration Results**

| No.           | Peak Name | Retention Time min | Area mAU*min   | Height mAU      | Relative Area % | Relative Height % | Amount n.a. |
|---------------|-----------|--------------------|----------------|-----------------|-----------------|-------------------|-------------|
| 1             |           | 19,503             | 247,188        | 1990,786        | 70,12           | 62,14             | n.a.        |
| 2             |           | 19,613             | 101,740        | 1174,462        | 28,86           | 36,66             | n.a.        |
| 3             |           | 19,780             | 3,586          | 38,431          | 1,02            | 1,20              | n.a.        |
| <b>Total:</b> |           |                    | <b>352,515</b> | <b>3203,679</b> | <b>100,00</b>   | <b>100,00</b>     |             |

$^{31}\text{P}$  NMR (162 MHz, Chloroform- $d$ )  $\delta$  18.54, 18.51.

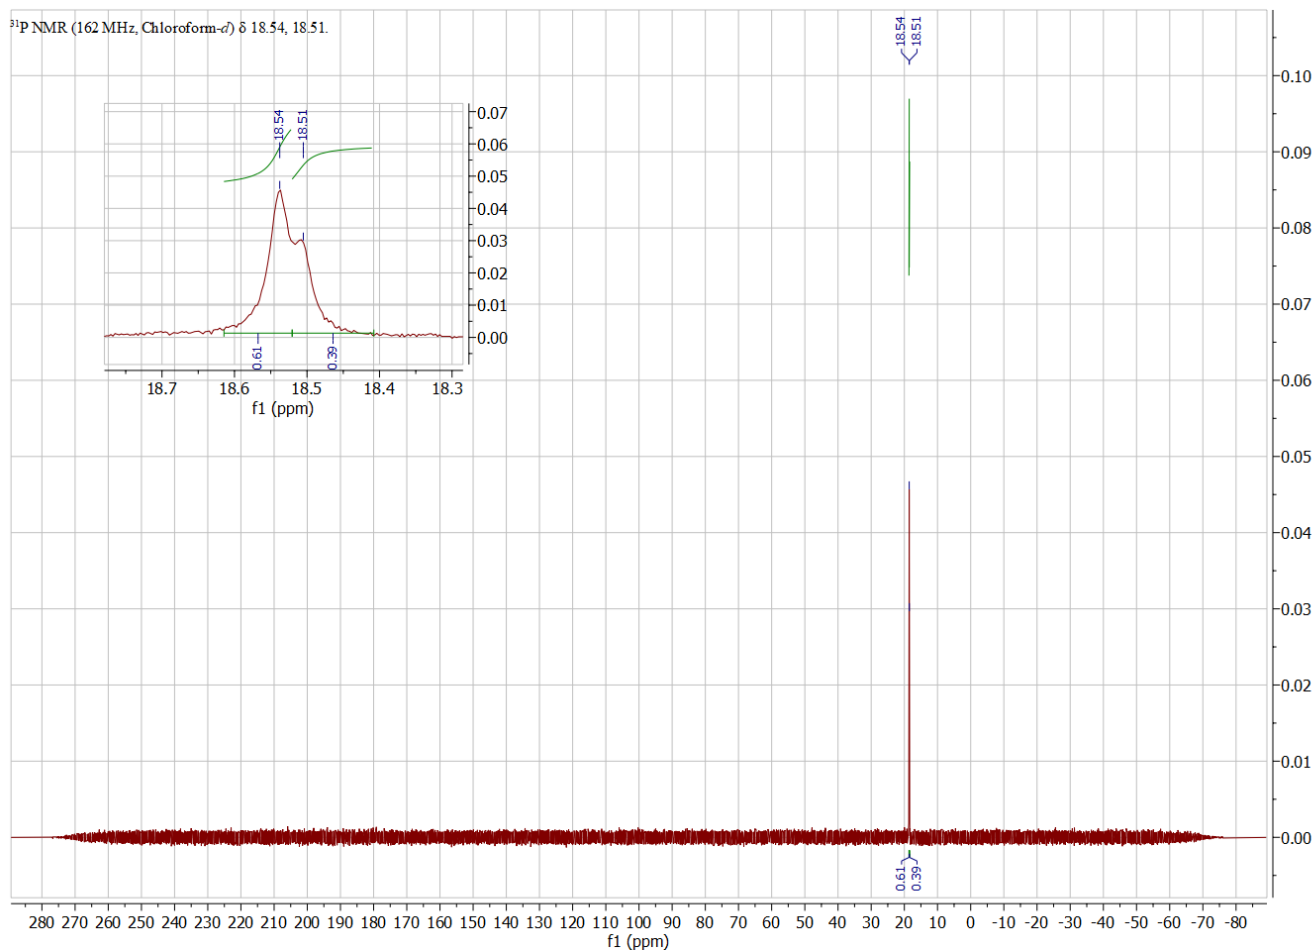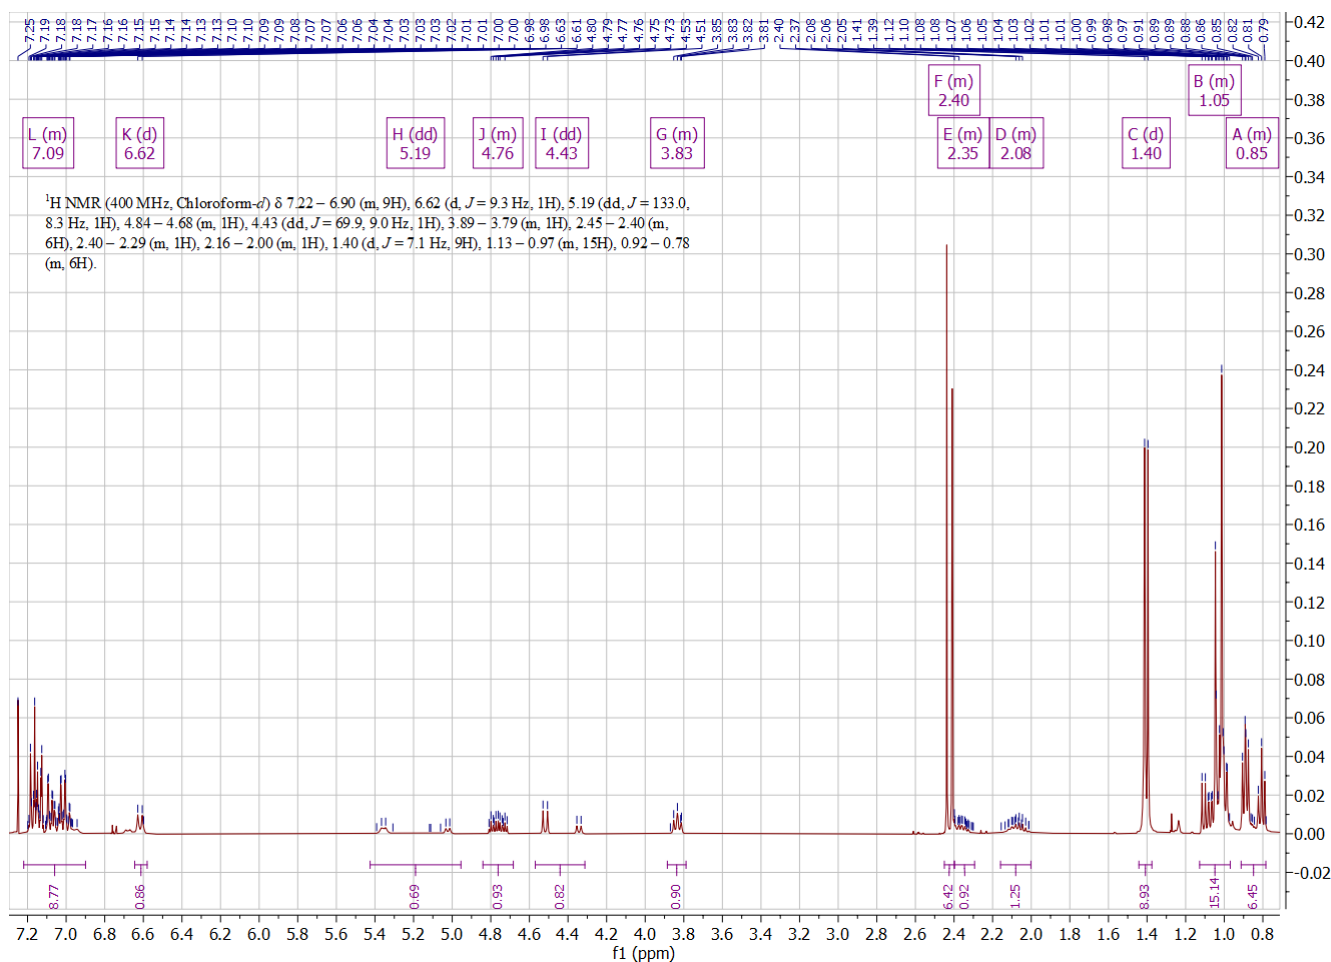

**(13) Boc-L-Val-D-Tle- Val<sup>P</sup>(OPh-4-SCH<sub>3</sub>)<sub>2</sub>**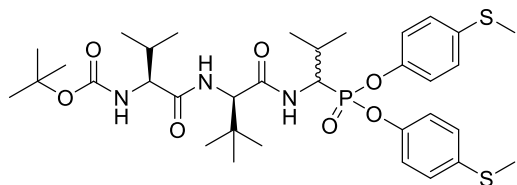

**Name:** *tert*-butyl ((2*S*)-1-(((2*R*)-1-((1-(bis(4-(methylthio)phenoxy)phosphoryl)-2-methylpropyl)amino)-3,3-dimethyl-1-oxobutan-2-yl)amino)-3-methyl-1-oxobutan-2-yl)carbamate

<sup>31</sup>P NMR (162 MHz, Chloroform-*d*) δ 18.52 (s, 33%), 18.47 (s, 67%).

<sup>1</sup>H NMR (400 MHz, Chloroform-*d*) δ 7.22 – 6.55 (m, 10H, 8xArH, 2xNH), 5.13 (dd, *J* = 145.8, 6.2 Hz, 1H, NH), 4.81 – 4.70 (m, 1H, CHP), 4.44 (dd, *J* = 73.2, 9.3 Hz, 1H, CH), 4.00 – 3.87 (m, 1H, CH), 2.47 – 2.41 (m, 6H, 2xSCH<sub>3</sub>), 2.41 – 2.29 (m, 1H, CH), 2.27 – 2.11 (m, 1H, CH), 1.40 (d, *J* = 6.9 Hz, 9H, Boc), 1.09 – 0.70 (m, 21H, 7xCH<sub>3</sub>).

**HRMS:** C<sub>34</sub>H<sub>52</sub>N<sub>3</sub>O<sub>7</sub>PS<sub>2</sub> [M+Na]<sup>+</sup> calc. 732.2882 found 732.2878

**HPLC:** purity >99%; retention time 19.653 and 19.787 min

**Chromatogram**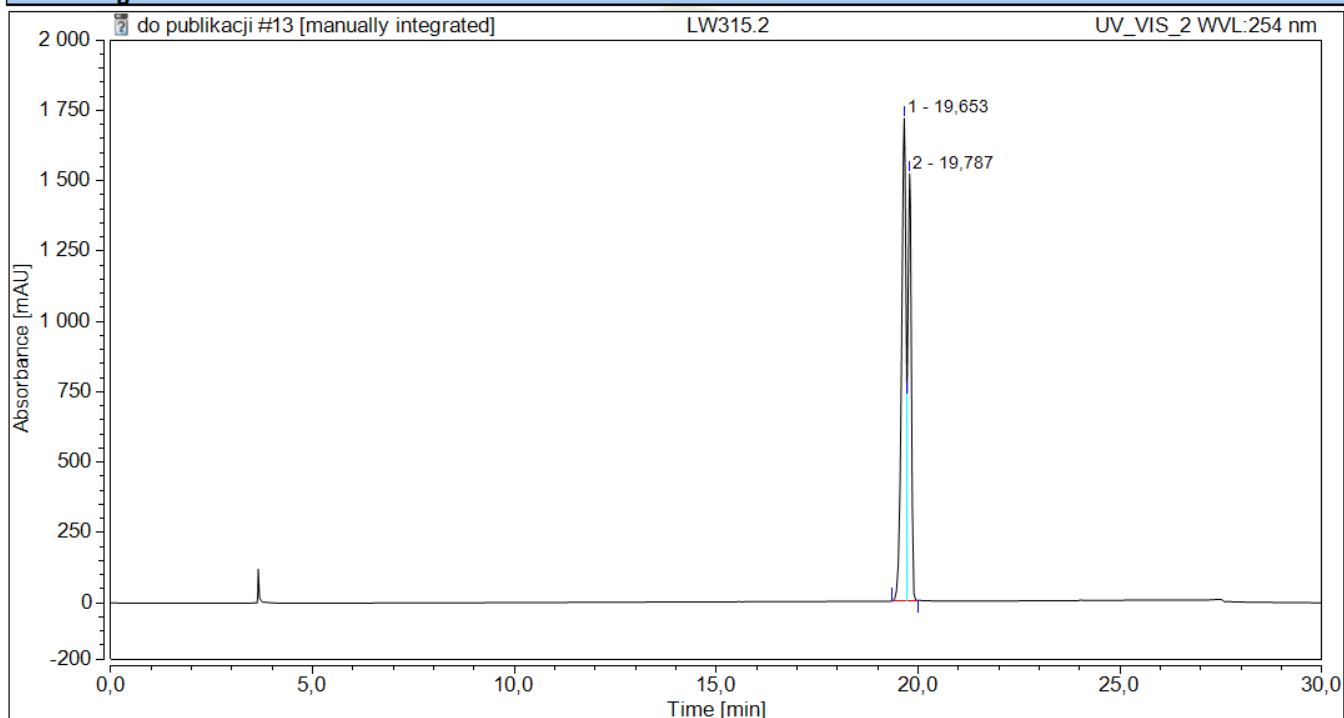**Integration Results**

| No.           | Peak Name | Retention Time<br>min | Area<br>mAU*min | Height<br>mAU   | Relative Area<br>% | Relative Height<br>% | Amount<br>n.a. |
|---------------|-----------|-----------------------|-----------------|-----------------|--------------------|----------------------|----------------|
| 1             |           | 19,653                | 214,250         | 1713,689        | 59,04              | 53,06                | n.a.           |
| 2             |           | 19,787                | 148,669         | 1516,088        | 40,96              | 46,94                | n.a.           |
| <b>Total:</b> |           |                       | <b>362,919</b>  | <b>3229,777</b> | <b>100,00</b>      | <b>100,00</b>        |                |

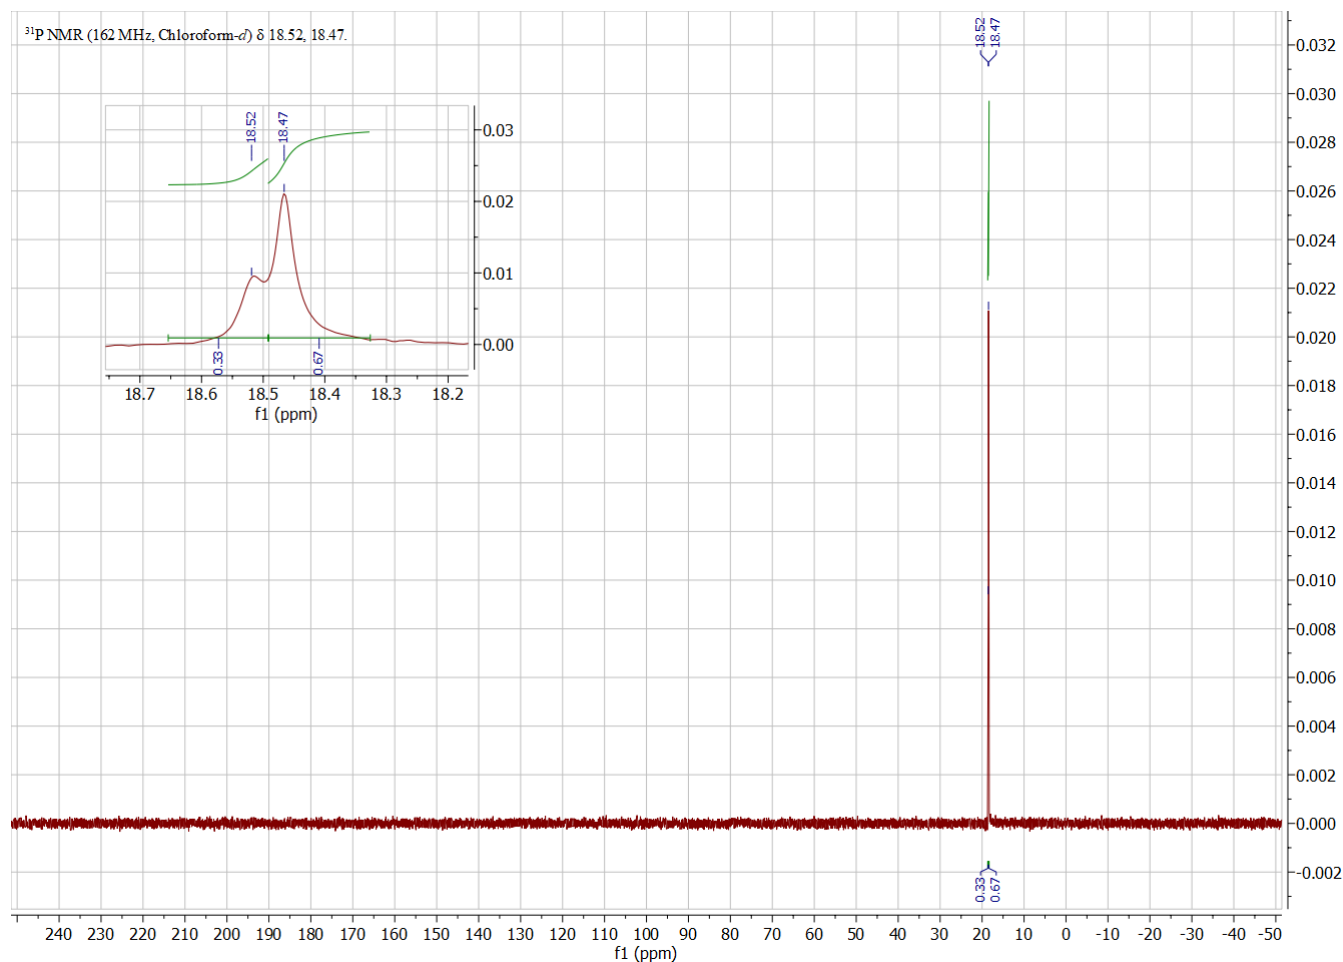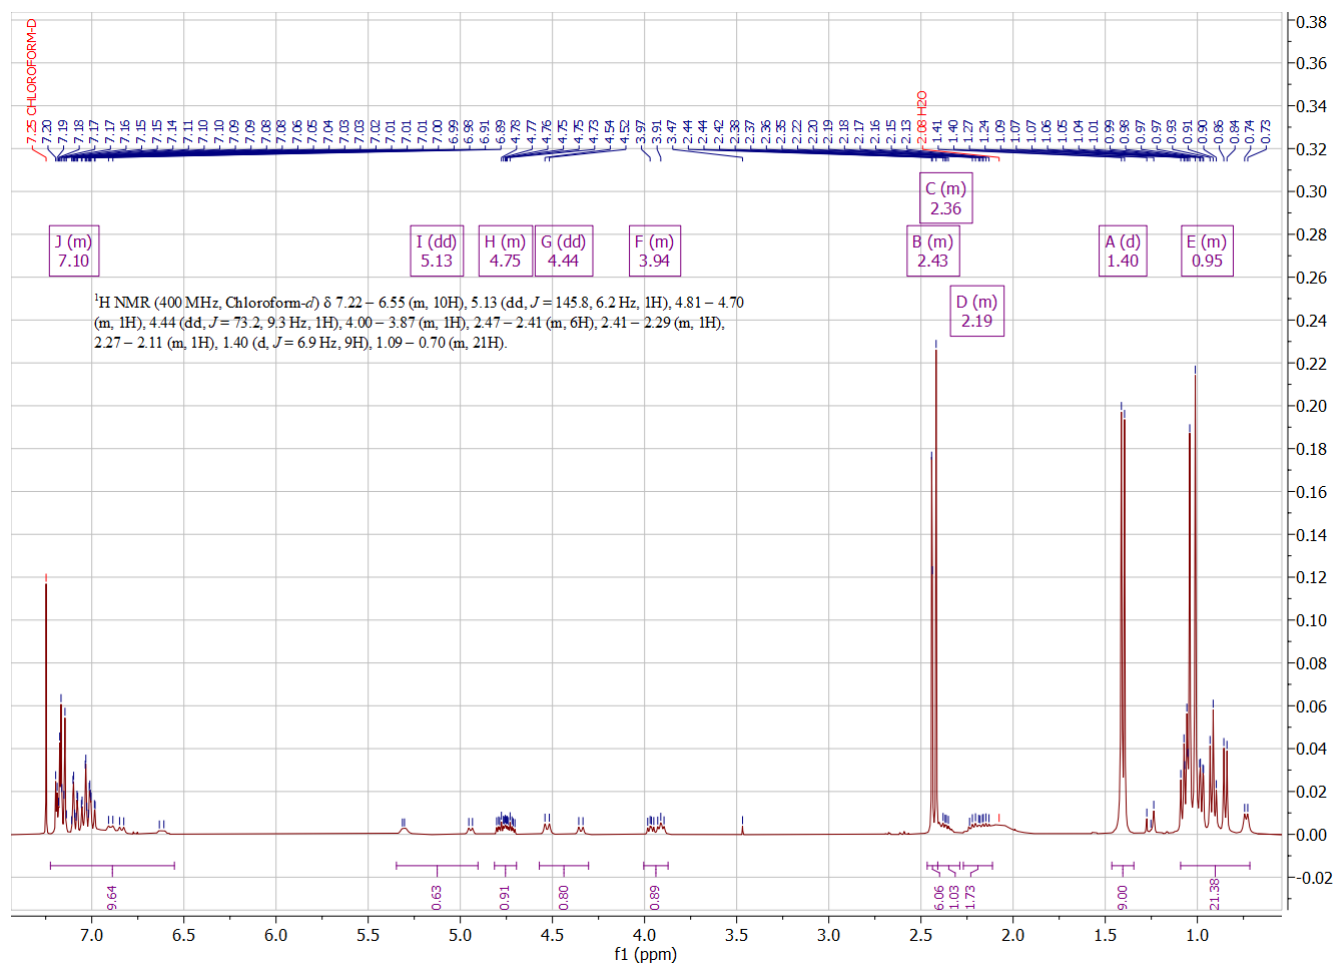

**(14) Boc-L-Val-L-Nle- Val<sup>P</sup>(OPh-4-SCH<sub>3</sub>)<sub>2</sub>**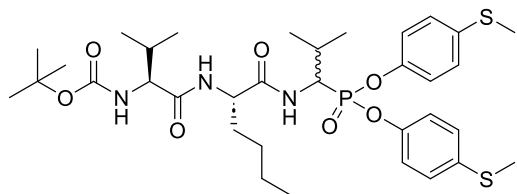

**Name:** *tert*-butyl ((2*S*)-1-(((2*S*)-1-((1-(bis(4-(methylthio)phenoxy)phosphoryl)-2-methylpropyl)amino)-1-oxohexan-2-yl)amino)-3-methyl-1-oxobutan-2-yl)carbamate

<sup>31</sup>P NMR (162 MHz, Chloroform-*d*) δ 18.17 (s, 43%), 18.15 (s, 57%).

<sup>1</sup>H NMR (400 MHz, Chloroform-*d*) δ 7.20 – 7.13 (m, 4H, 4xArH), 7.12 – 7.01 (m, 4H, 4xArH), 6.91 (t, *J* = 10.0 Hz, 1H, NH), 6.55 (dd, *J* = 26.1, 7.7 Hz, 1H, NH), 5.07 (dd, *J* = 46.3, 8.3 Hz, 1H, NH), 4.77 – 4.65 (m, 1H, CHP), 4.51 – 4.43 (m, 1H, CH), 3.91 – 3.84 (m, 1H, CH), 2.45 – 2.41 (m, 6H, 2xSCH<sub>3</sub>), 2.41 – 2.29 (m, 1H, CH), 2.18 – 2.04 (m, 1H, CH), 1.90 – 1.69 (m, 1H, CH<sub>2</sub>), 1.66 – 1.52 (m, 1H, CH<sub>2</sub>), 1.41 (d, *J* = 6.4 Hz, 9H, Boc), 1.32 – 1.21 (m, 4H, 2xCH<sub>2</sub>), 1.11 – 0.98 (m, 6H, 2xCH<sub>3</sub>), 0.95 – 0.74 (m, 9H, 3xCH<sub>3</sub>).

**HRMS:** C<sub>34</sub>H<sub>52</sub>N<sub>3</sub>O<sub>7</sub>PS<sub>2</sub> [M+Na]<sup>+</sup> calc. 732.2882 found 732.2873

**HPLC:** purity >98%; retention time 19.390 and 19.697 min

**Chromatogram**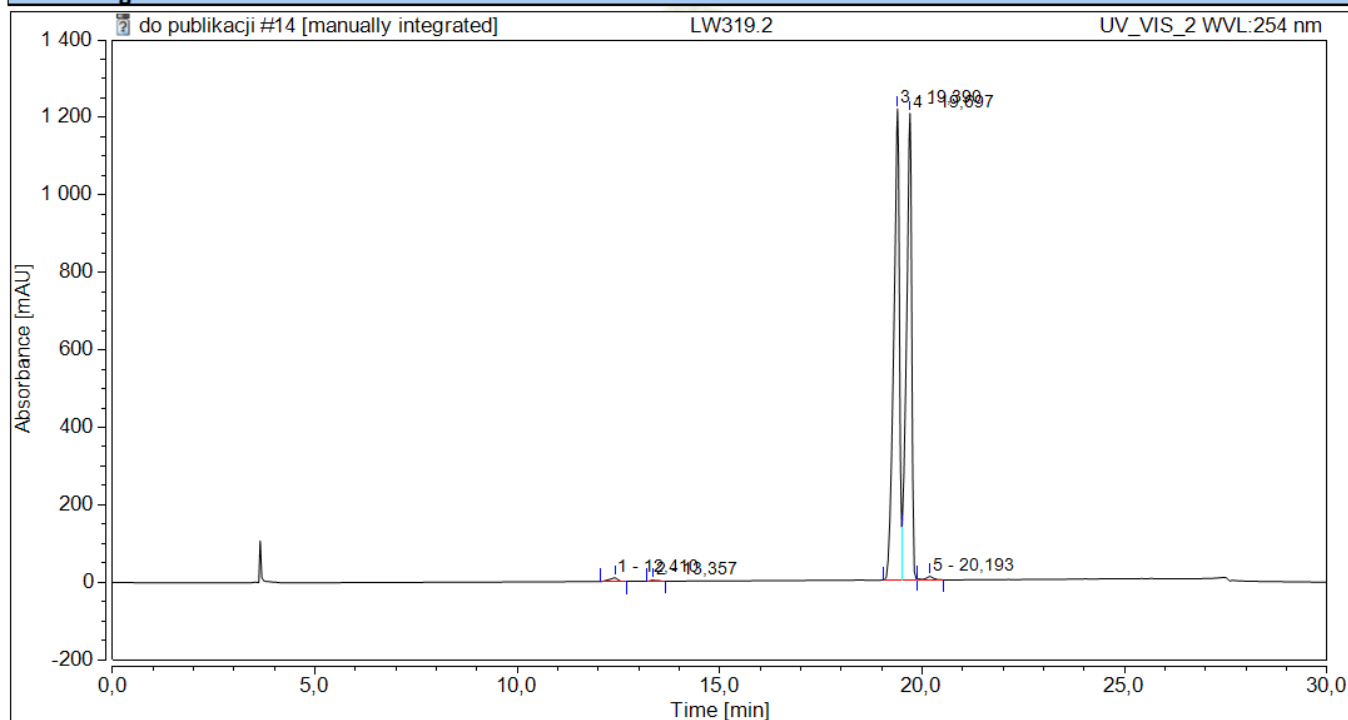**Integration Results**

| No.           | Peak Name | Retention Time<br>min | Area<br>mAU*min | Height<br>mAU   | Relative Area<br>% | Relative Height<br>% | Amount<br>n.a. |
|---------------|-----------|-----------------------|-----------------|-----------------|--------------------|----------------------|----------------|
| 1             |           | 12,410                | 2,217           | 9,704           | 0,58               | 0,40                 | n.a.           |
| 2             |           | 13,357                | 0,464           | 2,402           | 0,12               | 0,10                 | n.a.           |
| 3             |           | 19,390                | 195,761         | 1216,305        | 51,45              | 49,80                | n.a.           |
| 4             |           | 19,697                | 179,901         | 1204,540        | 47,28              | 49,32                | n.a.           |
| 5             |           | 20,193                | 2,173           | 9,497           | 0,57               | 0,39                 | n.a.           |
| <b>Total:</b> |           |                       | <b>380,517</b>  | <b>2442,450</b> | <b>100,00</b>      | <b>100,00</b>        |                |

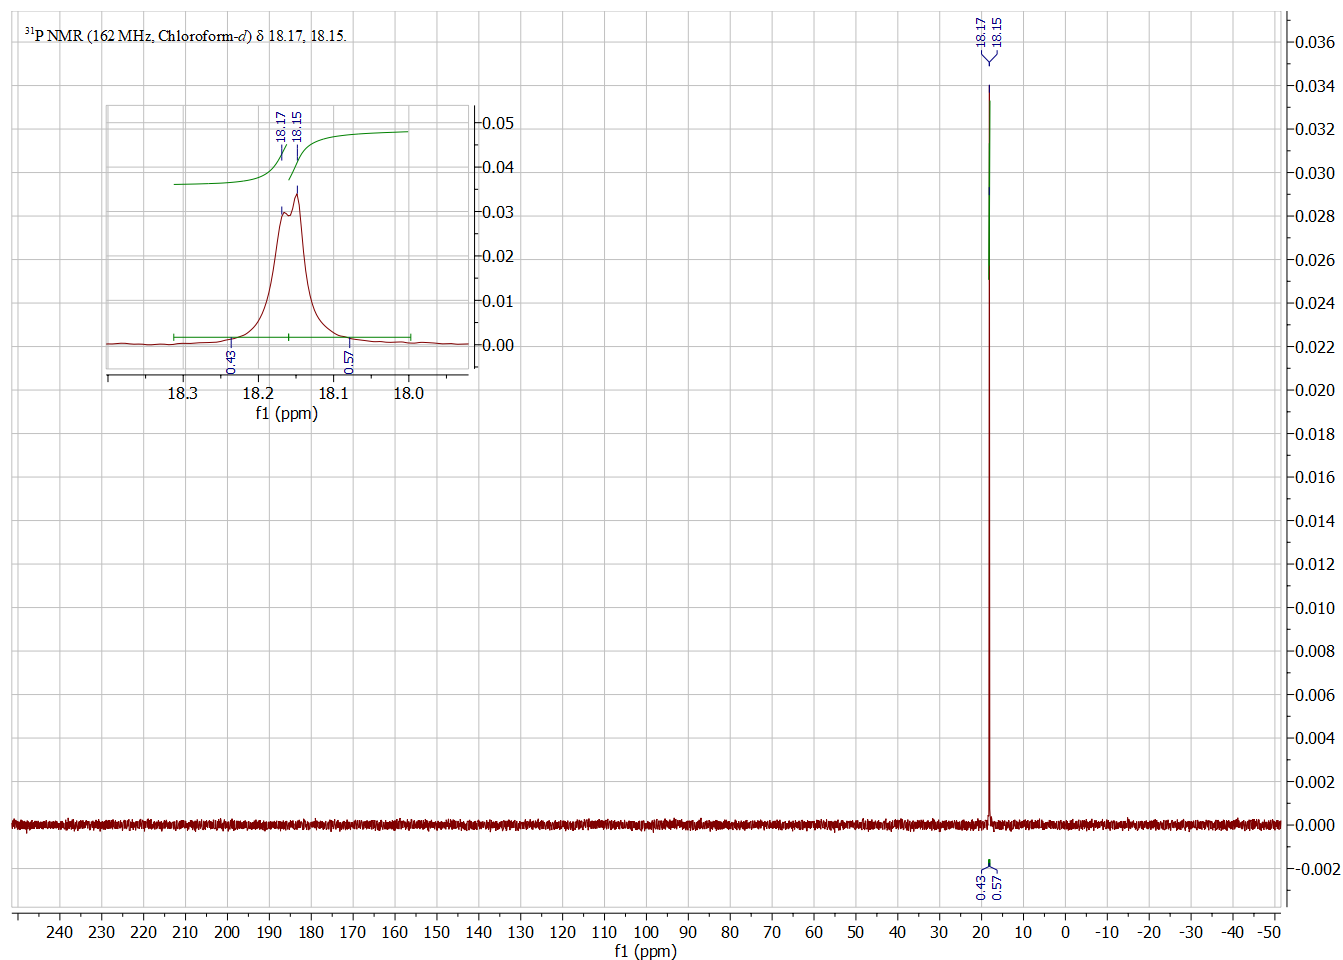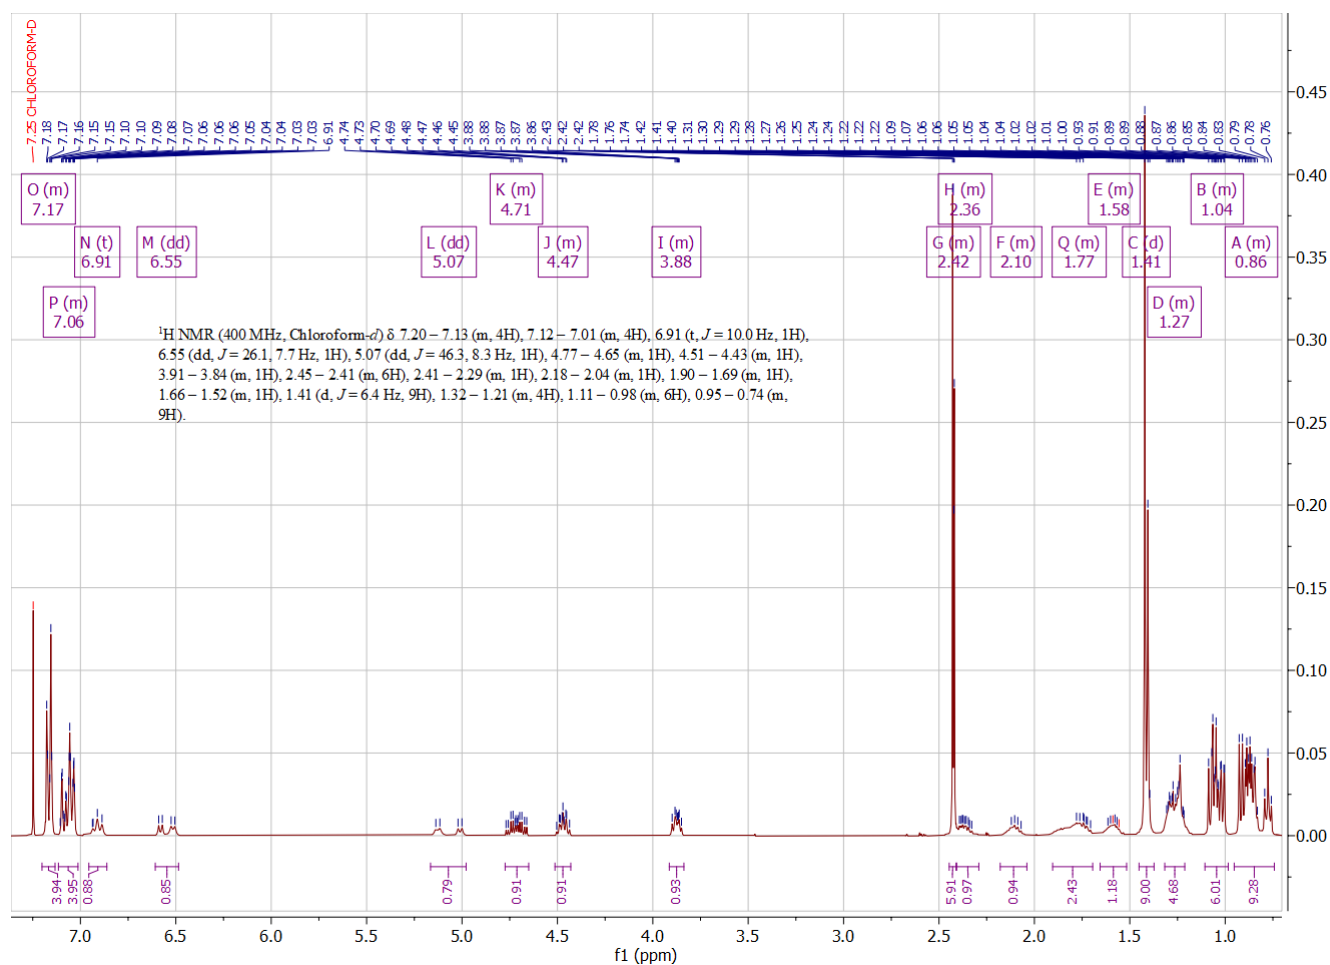



**(15) Boc-L-Val-D-Nle- Val<sup>P</sup>(OPh-4-SCH<sub>3</sub>)<sub>2</sub>**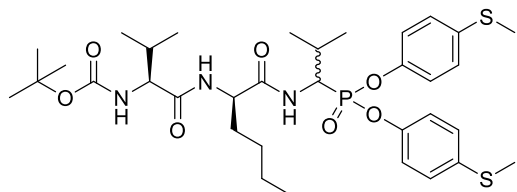

**Name:** *tert*-butyl ((2*S*)-1-(((2*R*)-1-((1-(bis(4-(methylthio)phenoxy)phosphoryl)-2-methylpropyl)amino)-1-oxohexan-2-yl)amino)-3-methyl-1-oxobutan-2-yl)carbamate

<sup>31</sup>P NMR (162 MHz, Chloroform-*d*) δ 18.31 (s, 55%), 18.08 (s, 45%).

<sup>1</sup>H NMR (400 MHz, Chloroform-*d*) δ 7.22 – 7.13 (m, 4H), 7.13 – 6.92 (m, 5H), 6.59 (dd, *J* = 56.3, 5.8 Hz, 1H), 5.08 (dd, *J* = 50.6, 7.1 Hz, 1H), 4.77 – 4.65 (m, 1H), 4.51 – 4.41 (m, 1H), 3.95 – 3.87 (m, 1H), 2.43 (dd, *J* = 1.8, 1.2 Hz, 6H), 2.41 – 2.24 (m, 1H), 2.18 – 2.05 (m, 1H), 1.93 – 1.66 (m, 1H), 1.64 – 1.51 (m, 1H), 1.40 (d, *J* = 6.7 Hz, 9H), 1.31 – 1.20 (m, 4H), 1.10 – 0.97 (m, 6H), 0.96 – 0.74 (m, 9H).

**HRMS:** C<sub>34</sub>H<sub>52</sub>N<sub>3</sub>O<sub>7</sub>PS<sub>2</sub> [M+Na]<sup>+</sup> calc. 732.2882 found 732.2864

**HPLC:** purity >98%; retention time 19.573 and 19.813 min

**Chromatogram**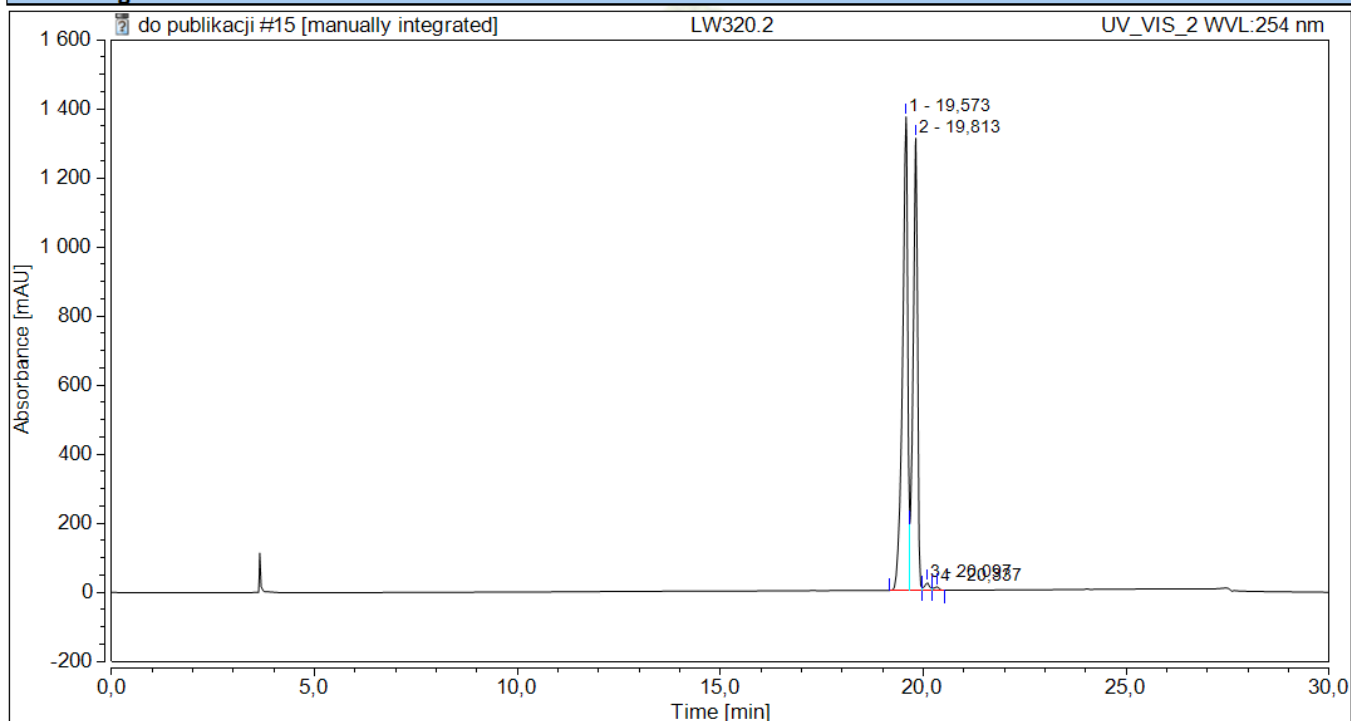**Integration Results**

| No.           | Peak Name | Retention Time<br>min | Area<br>mAU*min | Height<br>mAU   | Relative Area<br>% | Relative Height<br>% | Amount<br>n.a. |
|---------------|-----------|-----------------------|-----------------|-----------------|--------------------|----------------------|----------------|
| 1             |           | 19,573                | 201,084         | 1370,770        | 54,50              | 50,55                | n.a.           |
| 2             |           | 19,813                | 163,435         | 1308,748        | 44,29              | 48,26                | n.a.           |
| 3             |           | 20,097                | 3,071           | 22,062          | 0,83               | 0,81                 | n.a.           |
| 4             |           | 20,337                | 1,392           | 10,322          | 0,38               | 0,38                 | n.a.           |
| <b>Total:</b> |           |                       | <b>368,981</b>  | <b>2711,902</b> | <b>100,00</b>      | <b>100,00</b>        |                |

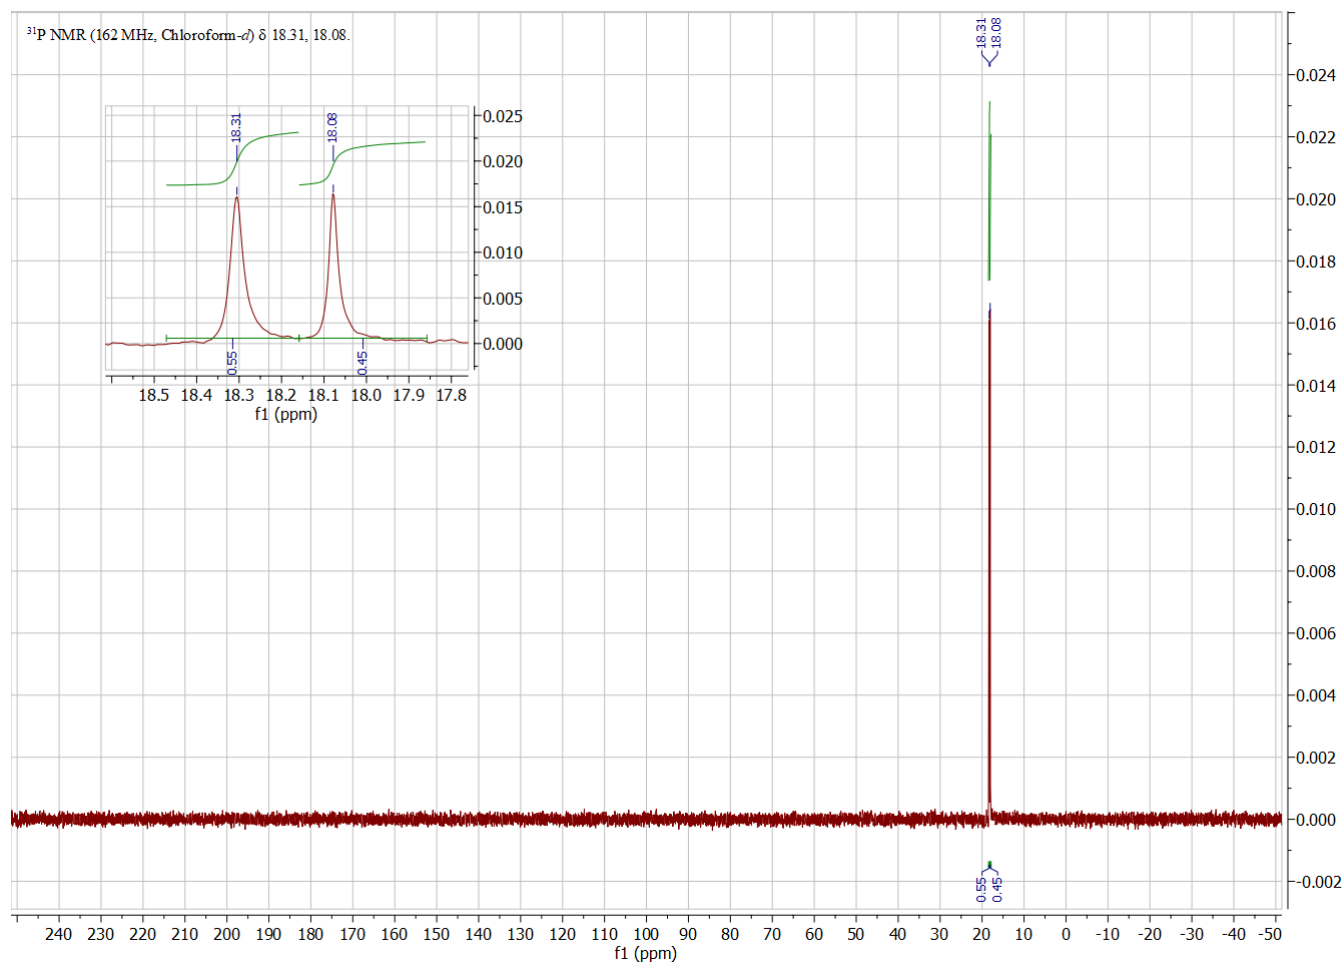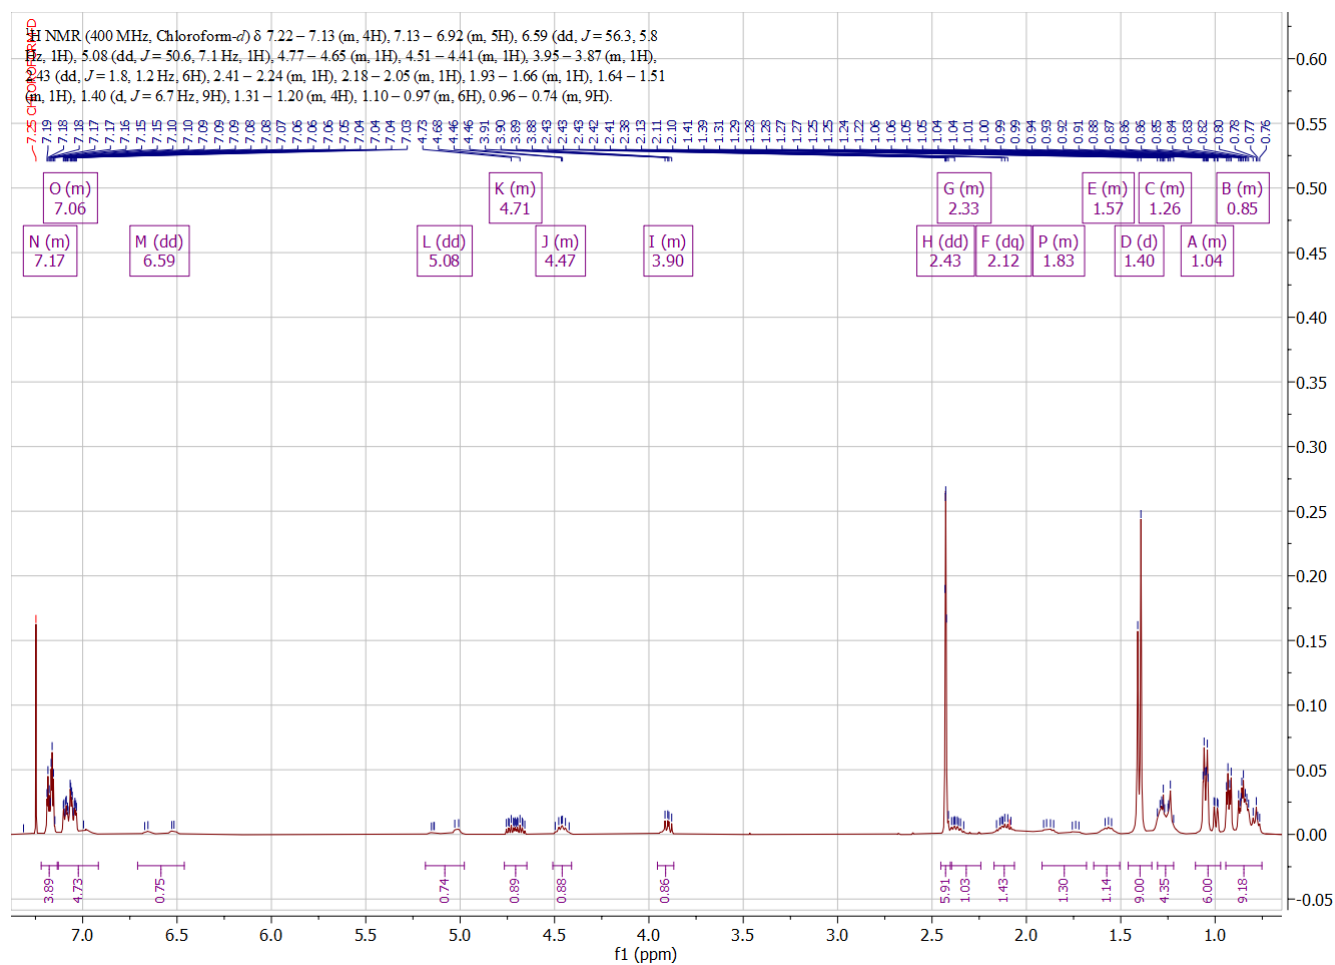

**(16) Boc-L-Val-L-Leu-Val<sup>P</sup>(OPh-4-SCH<sub>3</sub>)<sub>2</sub>**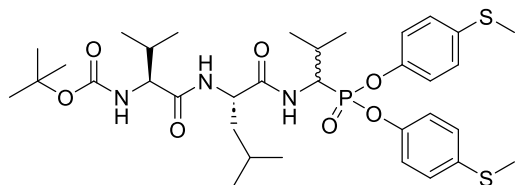

**Name:** *tert*-butyl ((2*S*)-1-(((2*S*)-1-((1-(bis(4-(methylthio)phenoxy)phosphoryl)-2-methylpropyl)amino)-4-methyl-1-oxopentan-2-yl)amino)-3-methyl-1-oxobutan-2-yl)carbamate

<sup>31</sup>P NMR (162 MHz, Chloroform-*d*) δ 18.37(s, 59%), 18.14 (s, 41%).

<sup>1</sup>H NMR (400 MHz, Chloroform-*d*) δ <sup>1</sup>H NMR (400 MHz, CHLOROFORM-*D*) δ 7.21 – 7.14 (m, 4H, 4xArH), 7.12 – 7.00 (m, 4H, 4xArH), 6.88 – 6.78 (m, 1H, NH), 6.46 – 6.38 (m, 1H, NH), 5.00 (dd, *J* = 43.1, 8.3 Hz, 1H, NH), 4.76 – 4.64 (m, 1H, CHP), 4.54 – 4.41 (m, 1H, CH), 3.89 – 3.80 (m, 1H, CH), 2.46 – 2.41 (m, 6H, 2xSCH<sub>3</sub>), 2.41 – 2.27 (m, 1H, CH), 2.22 – 2.01 (m, 1H, CH), 1.73 – 1.45 (m, 3H, CH<sub>2</sub>, CH), 1.41 (d, *J* = 6.6 Hz, 9H, Boc), 1.11 – 1.00 (m, 6H, 2xCH<sub>3</sub>), 0.94 – 0.82 (m, 12H, 4xCH<sub>3</sub>).

**HRMS:** C<sub>34</sub>H<sub>52</sub>N<sub>3</sub>O<sub>7</sub>PS<sub>2</sub> [M+Na]<sup>+</sup> calc. 732.2882 found 732.2874

**HPLC:** purity >98%; retention time 19.357 and 19.570 min

**Chromatogram**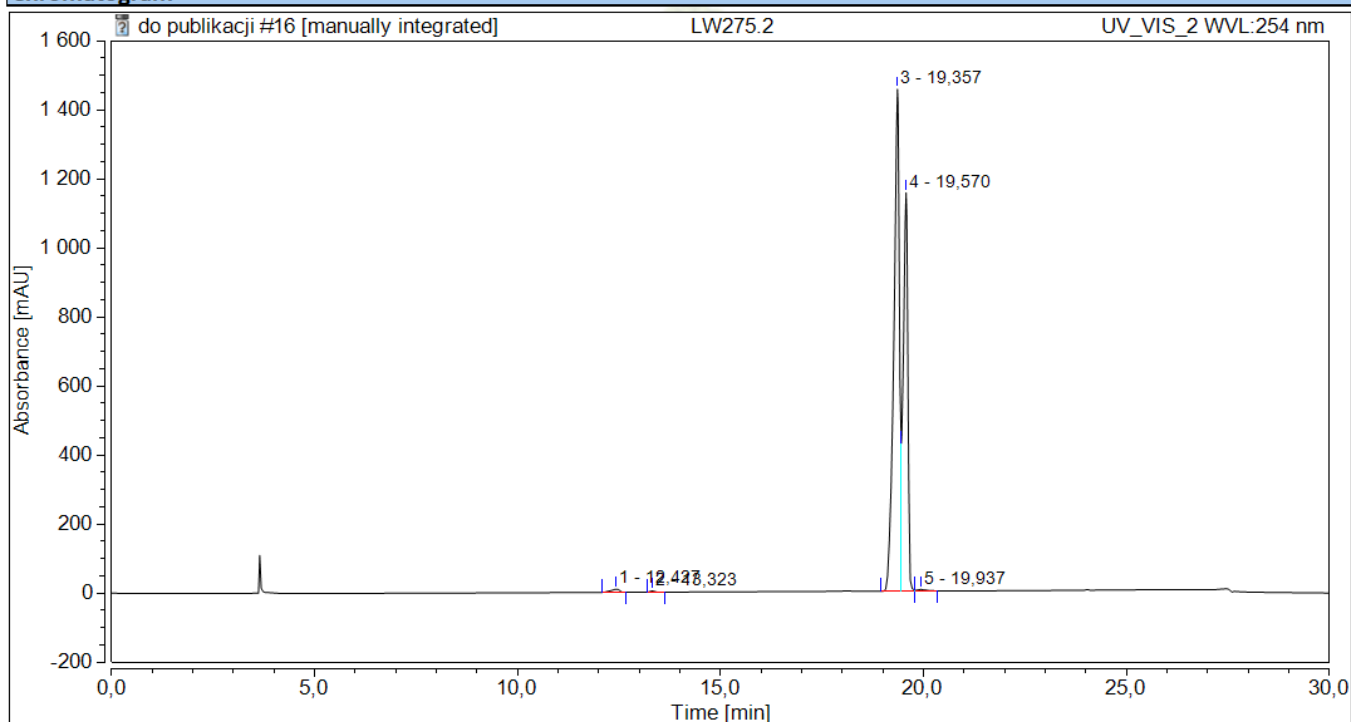**Integration Results**

| No.           | Peak Name | Retention Time<br>min | Area<br>mAU*min | Height<br>mAU   | Relative Area<br>% | Relative Height<br>% | Amount<br>n.a. |
|---------------|-----------|-----------------------|-----------------|-----------------|--------------------|----------------------|----------------|
| 1             |           | 12,427                | 2,256           | 9,302           | 0,58               | 0,35                 | n.a.           |
| 2             |           | 13,323                | 0,405           | 3,354           | 0,10               | 0,13                 | n.a.           |
| 3             |           | 19,357                | 231,119         | 1453,677        | 59,79              | 55,38                | n.a.           |
| 4             |           | 19,570                | 151,576         | 1153,570        | 39,21              | 43,95                | n.a.           |
| 5             |           | 19,937                | 1,205           | 4,930           | 0,31               | 0,19                 | n.a.           |
| <b>Total:</b> |           |                       | <b>386,562</b>  | <b>2624,833</b> | <b>100,00</b>      | <b>100,00</b>        |                |

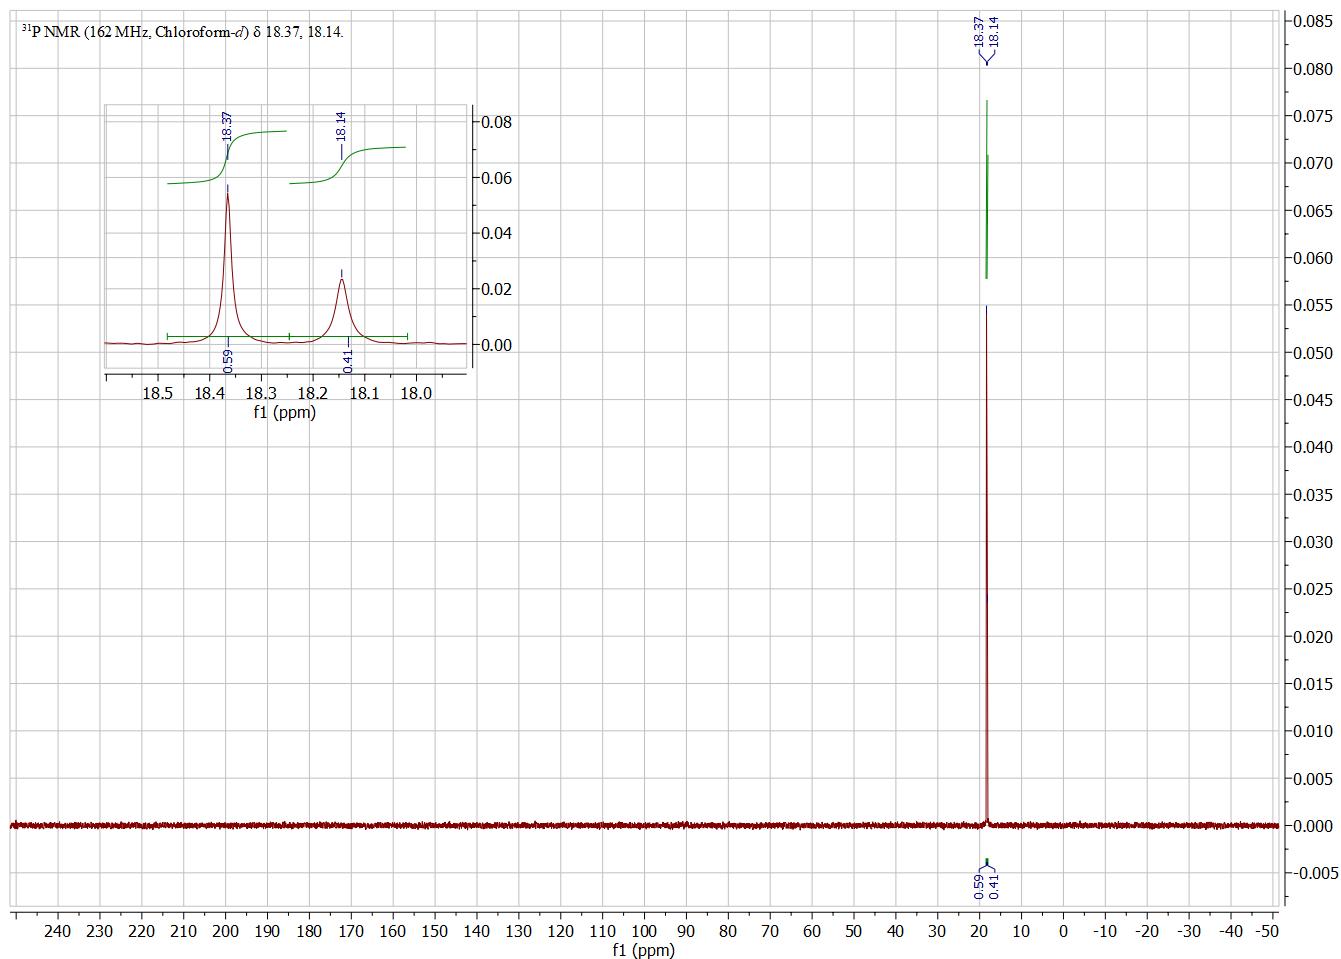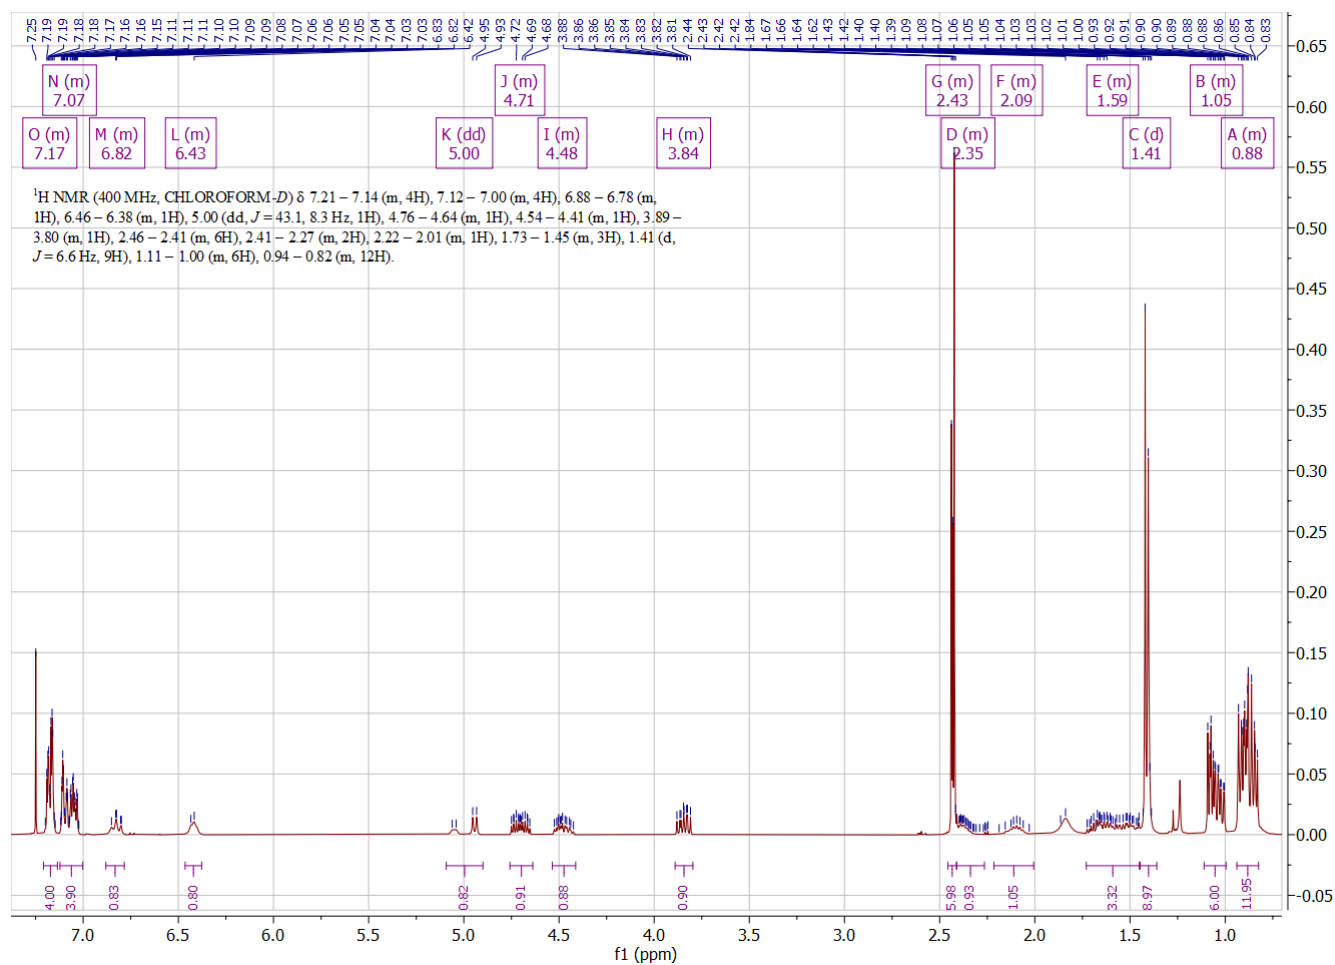

**(17) Boc-L-Val-D-Leu-Val<sup>P</sup>(OPh-4-SCH<sub>3</sub>)<sub>2</sub>**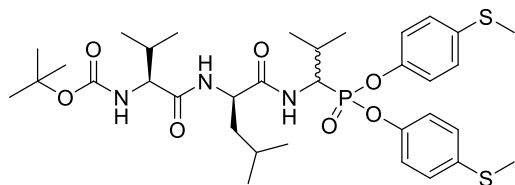

**Name:** *tert*-butyl ((2S)-1-(((2R)-1-((1-(bis(4-(methylthio)phenoxy)phosphoryl)-2-methylpropyl)amino)-4-methyl-1-oxopentan-2-yl)amino)-3-methyl-1-oxobutan-2-yl)carbamate

<sup>31</sup>P NMR (162 MHz, Chloroform-d) δ 18.43 (s, 45%), 18.02 (s, 55%).

<sup>1</sup>H NMR (400 MHz, Chloroform-d) δ 7.23 – 7.14 (m, 4H, 4xArH), 7.14 – 7.03 (m, 4H, 4xArH), 7.03 – 6.73 (m, 1H, NH), 6.54 (dd, *J* = 78.6, 7.8 Hz, 1H, NH), 5.06 (dd, *J* = 54.3, 8.3 Hz, 1H, NH), 4.77 – 4.64 (m, 1H, CHP), 4.55 – 4.41 (m, 1H, CH), 3.94 – 3.85 (m, 1H, CH), 2.47 – 2.41 (m, 6H, , 2xSCH<sub>3</sub>), 2.41 – 2.30 (m, 1H, CH), 2.18 – 2.05 (m, 1H, CH), 1.74 – 1.45 (m, 3H, CH<sub>2</sub>, CH), 1.40 (d, *J* = 7.9 Hz, 9H, Boc), 1.11 – 0.96 (m, 6H, 2xCH<sub>3</sub>), 0.94 – 0.80 (m, 12H, 4xCH<sub>3</sub>).

**HRMS:** C<sub>34</sub>H<sub>52</sub>N<sub>3</sub>O<sub>7</sub>PS<sub>2</sub> [M+Na]<sup>+</sup> calc. 732.2882 found 732.2891

**HPLC:** purity >99%; retention time 19.500 and 19.703 min

**Chromatogram**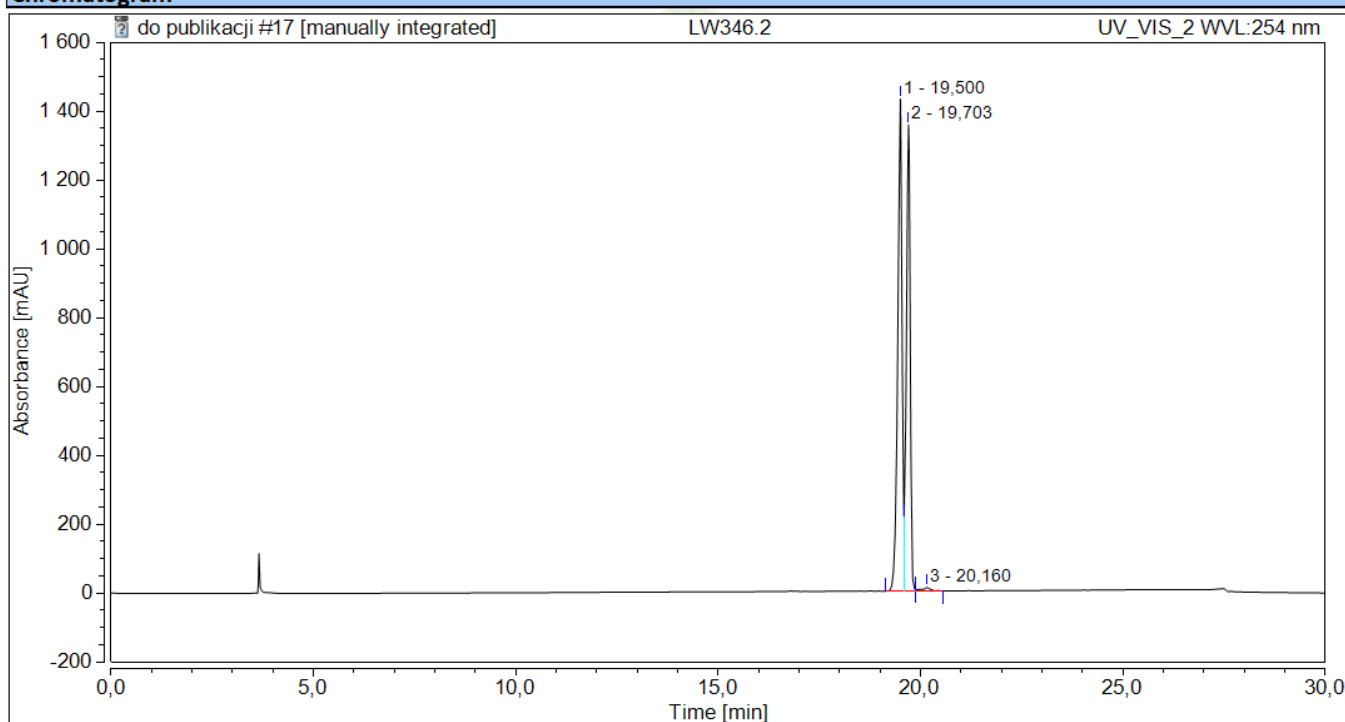**Integration Results**

| No.           | Peak Name | Retention Time min | Area mAU*min   | Height mAU      | Relative Area % | Relative Height % | Amount n.a. |
|---------------|-----------|--------------------|----------------|-----------------|-----------------|-------------------|-------------|
| 1             |           | 19,500             | 172,959        | 1429,321        | 53,22           | 51,16             | n.a.        |
| 2             |           | 19,703             | 149,534        | 1354,174        | 46,02           | 48,47             | n.a.        |
| 3             |           | 20,160             | 2,469          | 10,525          | 0,76            | 0,38              | n.a.        |
| <b>Total:</b> |           |                    | <b>324,962</b> | <b>2794,020</b> | <b>100,00</b>   | <b>100,00</b>     |             |

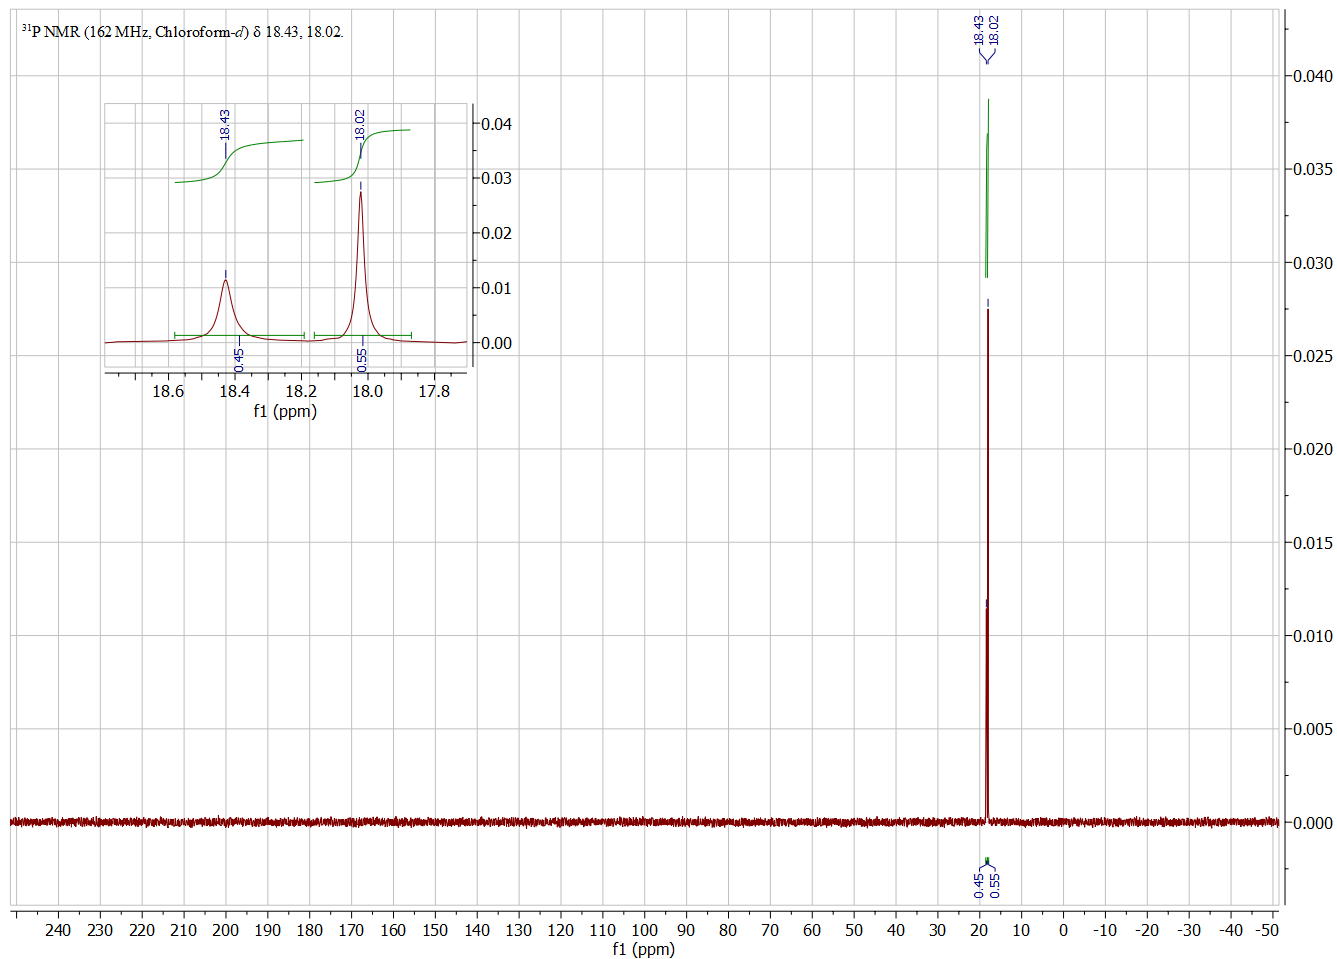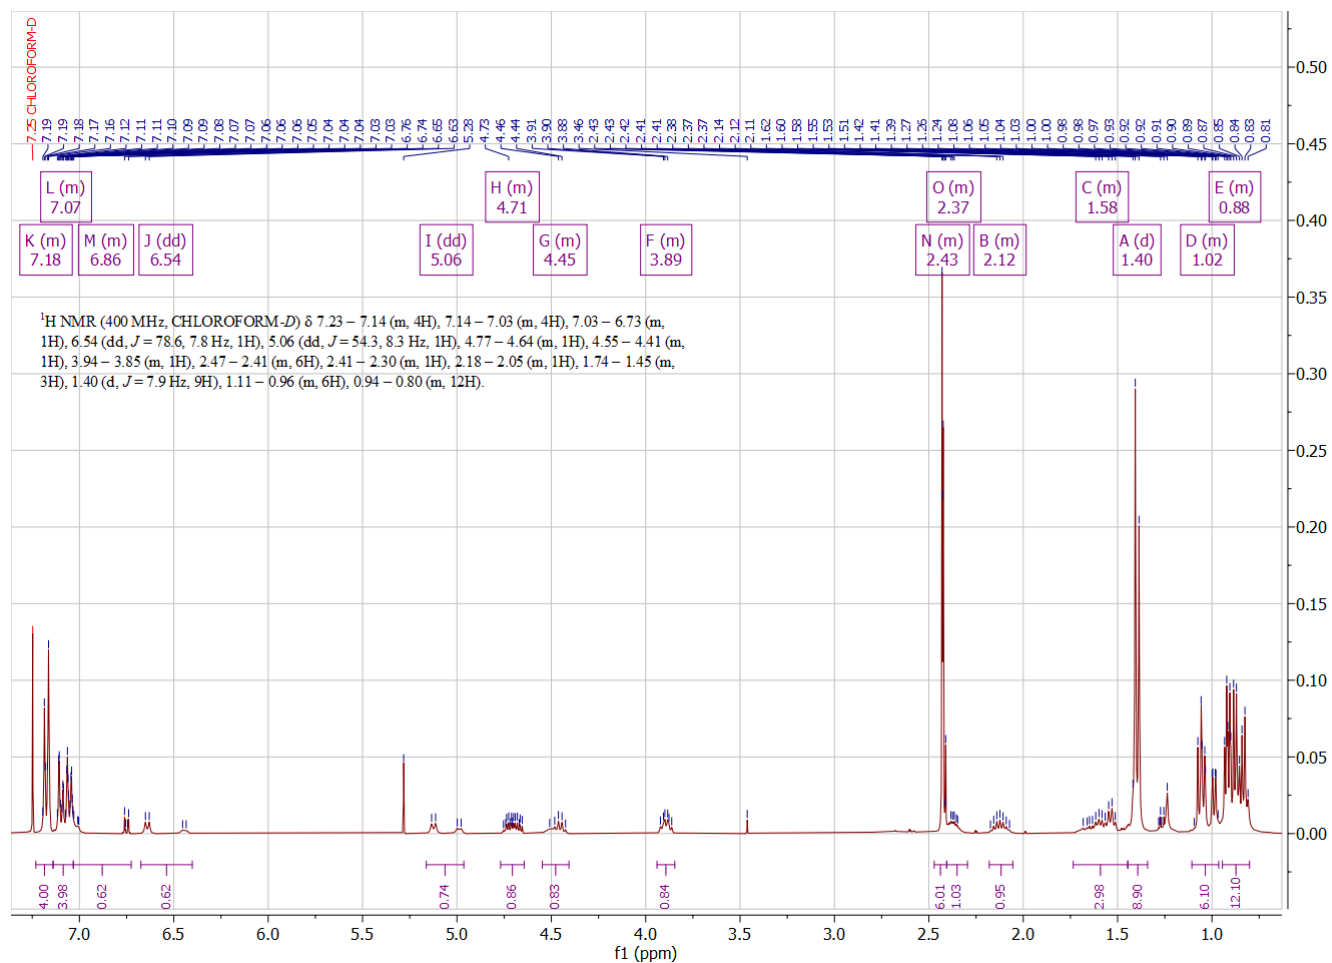

**(18) Boc-L-Val-L-NptGly-ValP(OPh-4-SCH3)2**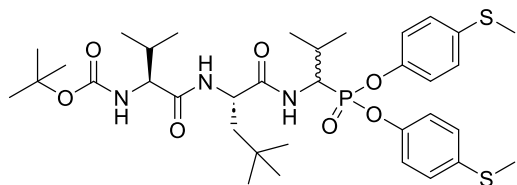

**Name:** *tert*-butyl ((2*S*)-1-(((2*S*)-1-((1-(bis(4-(methylthio)phenoxy)phosphoryl)-2-methylpropyl)amino)-4,4-dimethyl-1-oxopentan-2-yl)amino)-3-methyl-1-oxobutan-2-yl)carbamate

<sup>31</sup>P NMR (162 MHz, Chloroform-*d*) δ 18.53 (s, 50%), 18.32 (s, 50%).

<sup>1</sup>H NMR (400 MHz, Chloroform-*d*) δ 7.22 – 7.01 (m, 8H, 8XArH), 6.84 (dd, *J* = 37.1, 10.0 Hz, 1H, NH), 6.40 (d, *J* = 7.9 Hz, 1H, NH), 4.93 (dd, *J* = 42.9, 8.4 Hz, 1H, NH), 4.74 – 4.62 (m, 1H, CHP), 4.53 – 4.41 (m, 1H, CH), 3.89 – 3.78 (m, 1H, CH), 2.47 – 2.41 (m, 6H, 2xSCH<sub>3</sub>), 2.41 – 2.28 (m, 1H, CH), 2.21 – 2.06 (m, 1H, CH), 1.98 – 1.80 (m, 2H, CH<sub>2</sub>), 1.41 (d, *J* = 10.6 Hz, 9H, Boc), 1.11 – 0.99 (m, 6H, 2xCH<sub>3</sub>), 0.91 (d, *J* = 12.4 Hz, 9H, 3xCH<sub>3</sub>), 0.92 – 0.82 (m, 6H, 2xCH<sub>3</sub>).

**HRMS:** C<sub>35</sub>H<sub>54</sub>N<sub>3</sub>O<sub>7</sub>PS<sub>2</sub> [M+Na]<sup>+</sup> calc. 746.3038 found 746.3046

**HPLC:** purity >98%; retention time 19.840 and 20.033 min

**Chromatogram**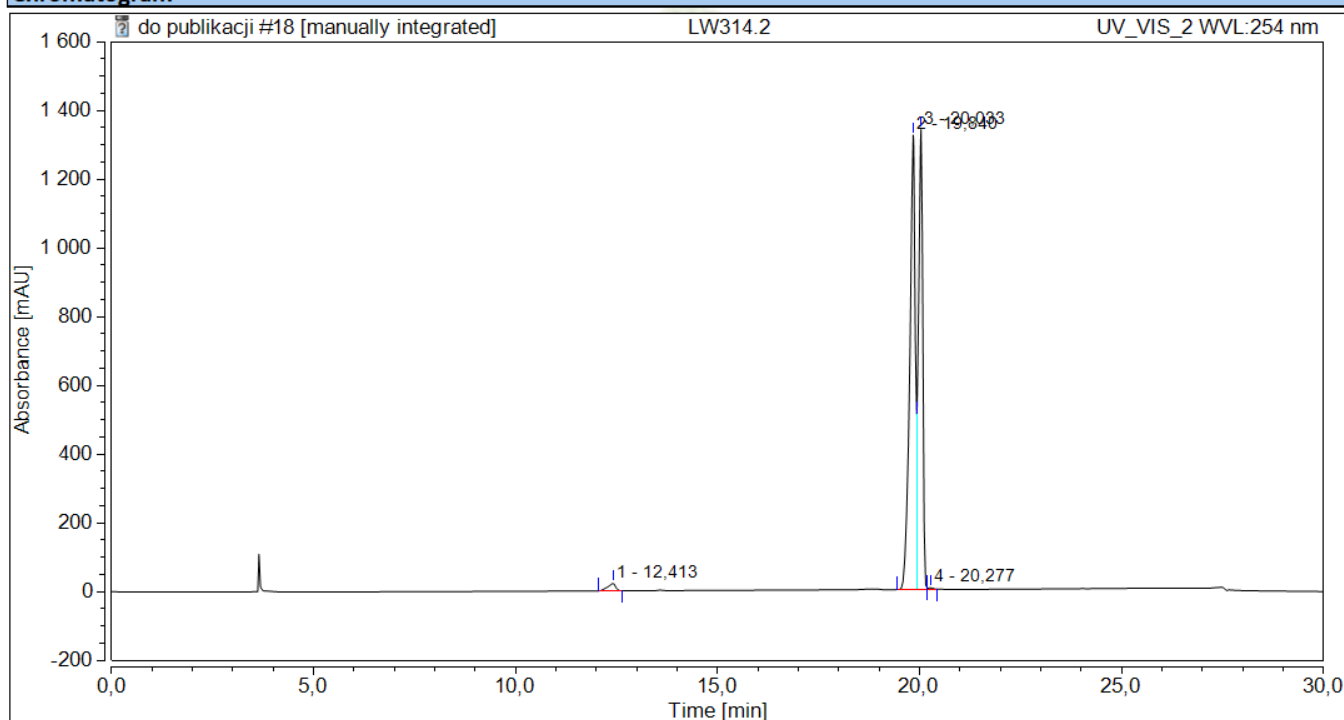**Integration Results**

| No.           | Peak Name | Retention Time<br>min | Area<br>mAU*min | Height<br>mAU   | Relative Area<br>% | Relative Height<br>% | Amount |
|---------------|-----------|-----------------------|-----------------|-----------------|--------------------|----------------------|--------|
| 1             |           | 12,413                | 4,915           | 22,539          | 1,31               | 0,84                 | n.a.   |
| 2             |           | 19,840                | 205,463         | 1321,675        | 54,68              | 49,21                | n.a.   |
| 3             |           | 20,033                | 164,804         | 1337,354        | 43,86              | 49,79                | n.a.   |
| 4             |           | 20,277                | 0,567           | 4,424           | 0,15               | 0,16                 | n.a.   |
| <b>Total:</b> |           |                       | <b>375,749</b>  | <b>2685,992</b> | <b>100,00</b>      | <b>100,00</b>        |        |

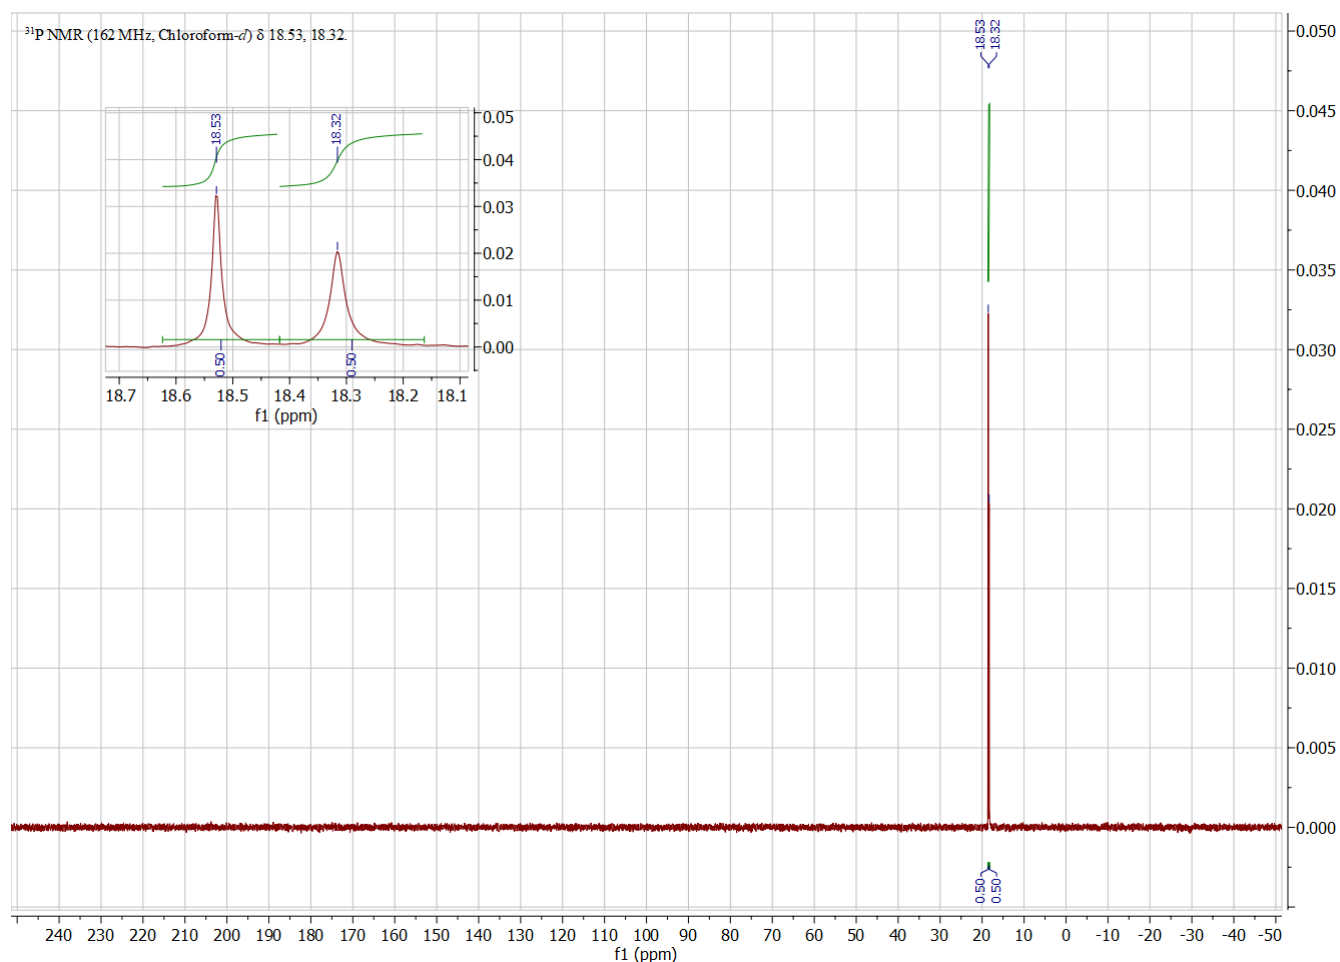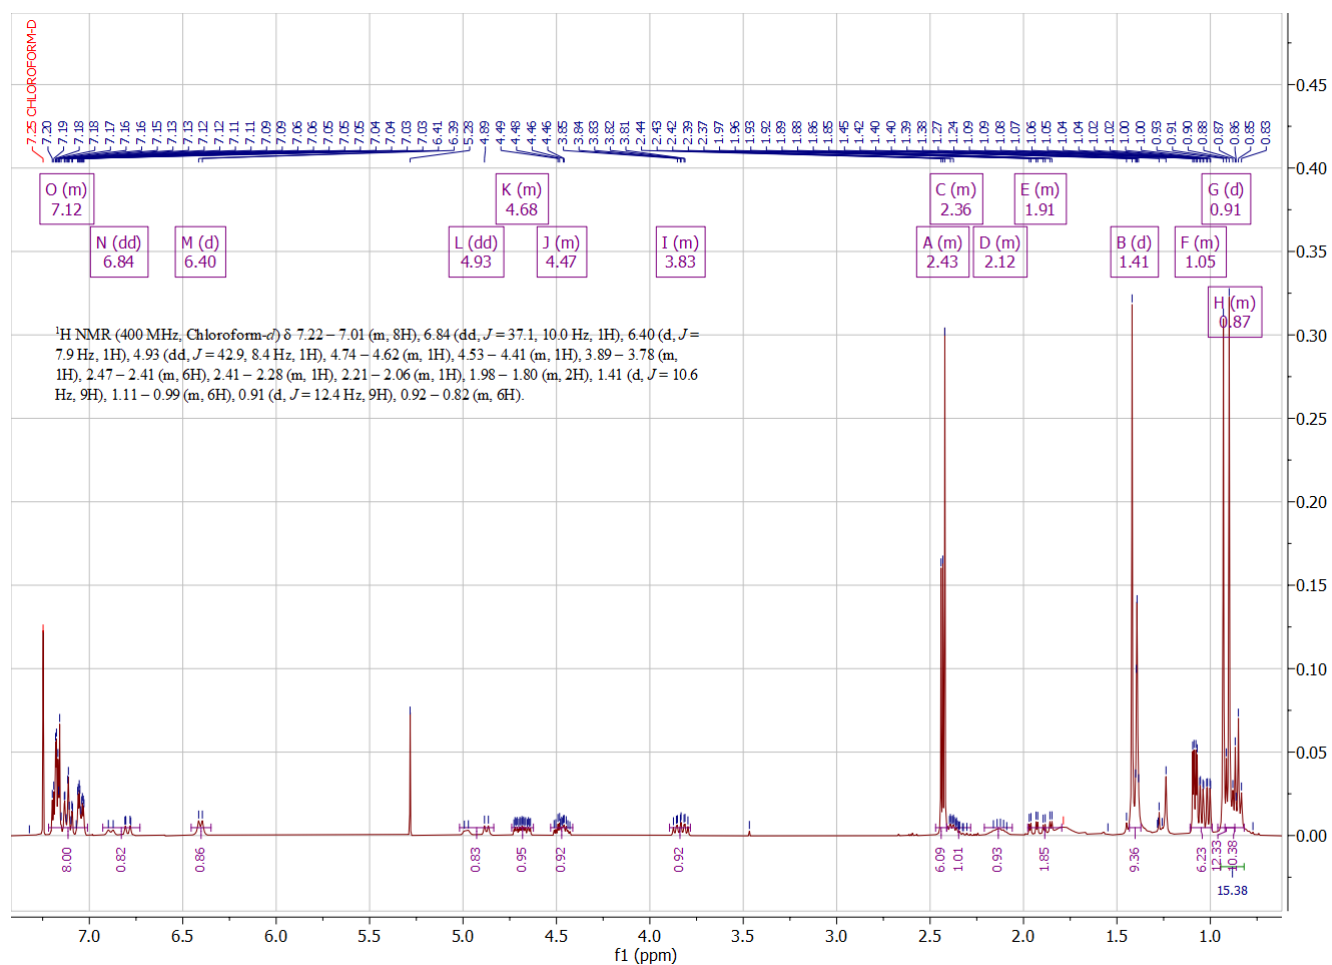



**(19) Boc-L-Val-L-Met-Val<sup>P</sup>(OPh-4-SCH<sub>3</sub>)<sub>2</sub>**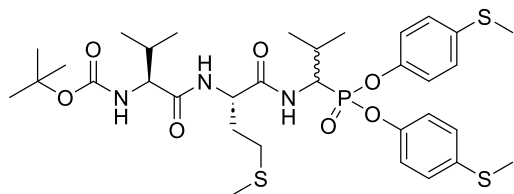

**Name:** *tert*-butyl ((2*S*)-1-(((2*S*)-1-((1-(bis(4-(methylthio)phenoxy)phosphoryl)-2-methylpropyl)amino)-4-(methylthio)-1-oxobutan-2-yl)amino)-3-methyl-1-oxobutan-2-yl)carbamate

<sup>31</sup>P NMR (162 MHz, Chloroform-*d*) δ 18.08 (s).

<sup>1</sup>H NMR (400 MHz, Chloroform-*d*) δ 7.21 – 7.14 (m, 4H, 4xArH), 7.12 (dd, *J* = 8.9, 1.3 Hz, 1H, NH), 7.09 – 6.97 (m, 4H, 4xArH), 6.88 (dd, *J* = 53.7, 7.7 Hz, 1H, NH), 5.02 (dd, *J* = 33.4, 8.0 Hz, 1H, NH), 4.77 – 4.63 (m, 2H, CHP, CH), 3.93 – 3.83 (m, 1H, CH), 2.62 – 2.45 (m, 2H, CH<sub>2</sub>), 2.45 – 2.41 (m, 6H, 2xSCH<sub>3</sub>), 2.41 – 2.31 (m, 1H, CH), 2.18 – 1.93 (m, 3H, CH<sub>2</sub>, CH), 2.05 (d, *J* = 19.5 Hz, 3H, CH<sub>3</sub>), 1.41 (d, *J* = 9.4 Hz, 9H, Boc), 1.12 – 0.99 (m, 6H, 2xCH<sub>3</sub>), 0.96 – 0.82 (m, 6H, 2xCH<sub>3</sub>).

**HRMS:** C<sub>33</sub>H<sub>50</sub>N<sub>3</sub>O<sub>7</sub>PS<sub>3</sub> [M+Na]<sup>+</sup> calc. 750.2446 found 750.2450

**HPLC:** purity >99%; retention time 18.793 and 18.963 min

**Chromatogram**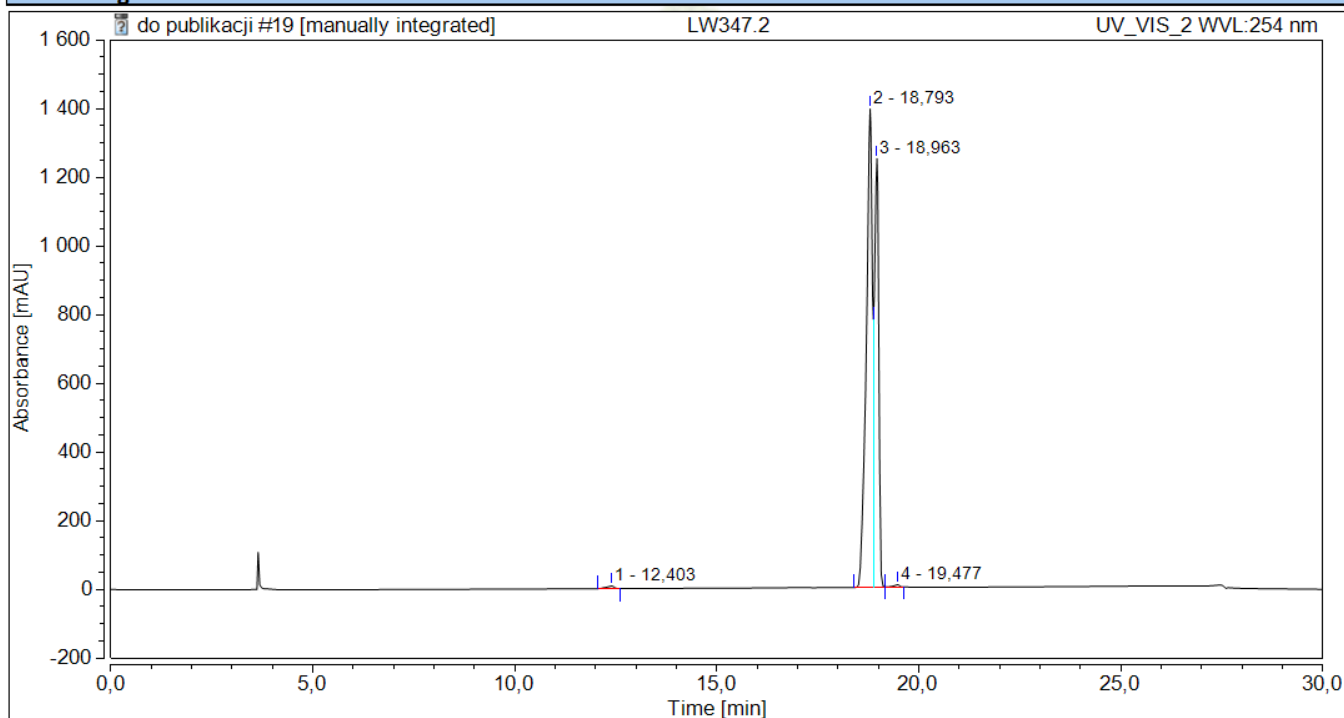**Integration Results**

| No.           | Peak Name | Retention Time<br>min | Area<br>mAU*min | Height<br>mAU   | Relative Area<br>% | Relative Height<br>% | Amount<br>n.a. |
|---------------|-----------|-----------------------|-----------------|-----------------|--------------------|----------------------|----------------|
| 1             |           | 12,403                | 1,749           | 7,865           | 0,44               | 0,30                 | n.a.           |
| 2             |           | 18,793                | 237,376         | 1392,708        | 59,64              | 52,44                | n.a.           |
| 3             |           | 18,963                | 157,496         | 1248,058        | 39,57              | 46,99                | n.a.           |
| 4             |           | 19,477                | 1,362           | 7,378           | 0,34               | 0,28                 | n.a.           |
| <b>Total:</b> |           |                       | <b>397,984</b>  | <b>2656,009</b> | <b>100,00</b>      | <b>100,00</b>        |                |

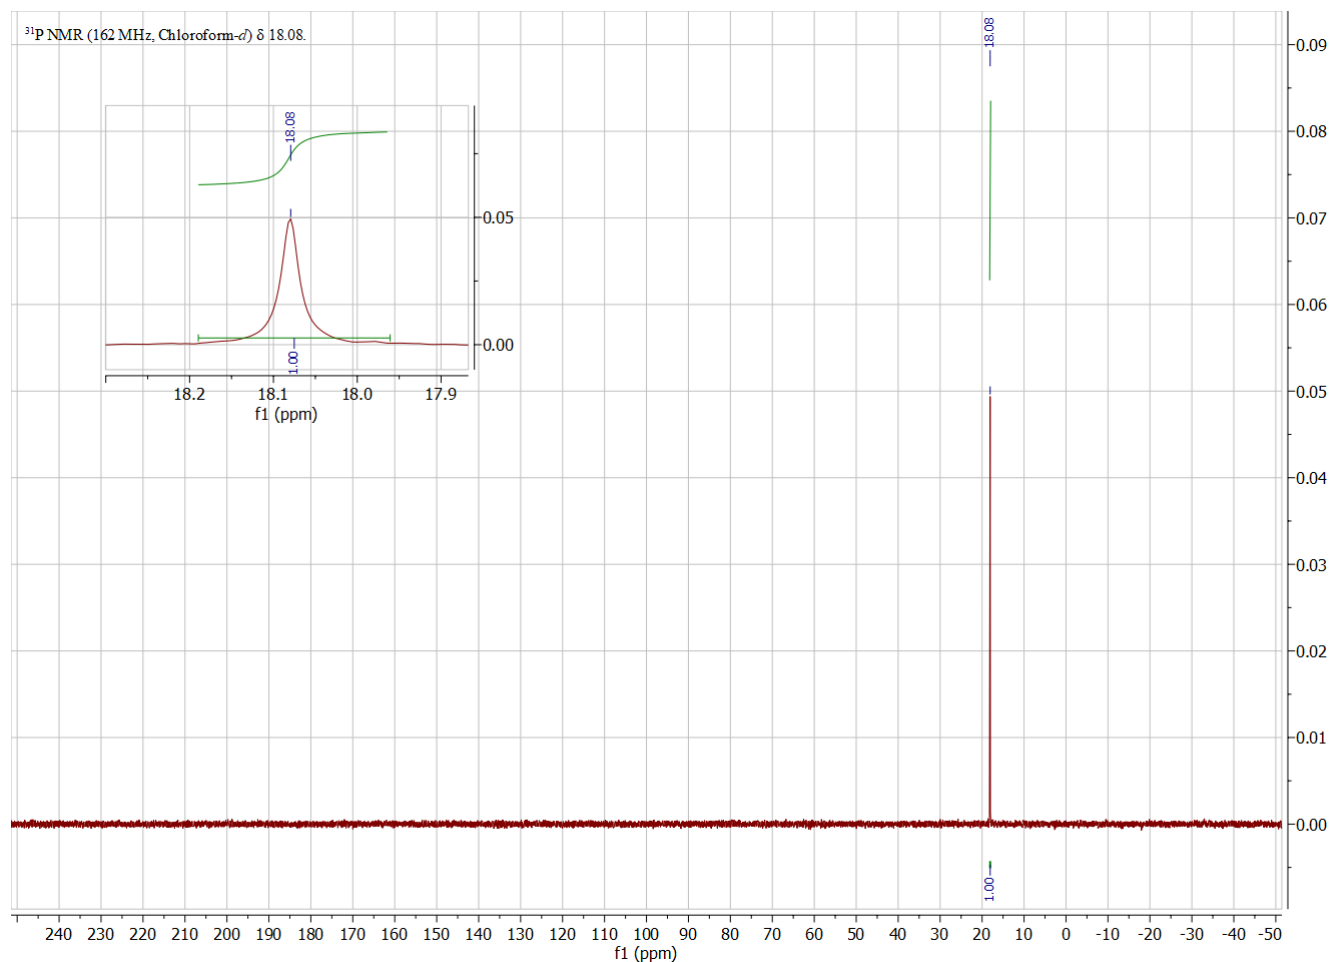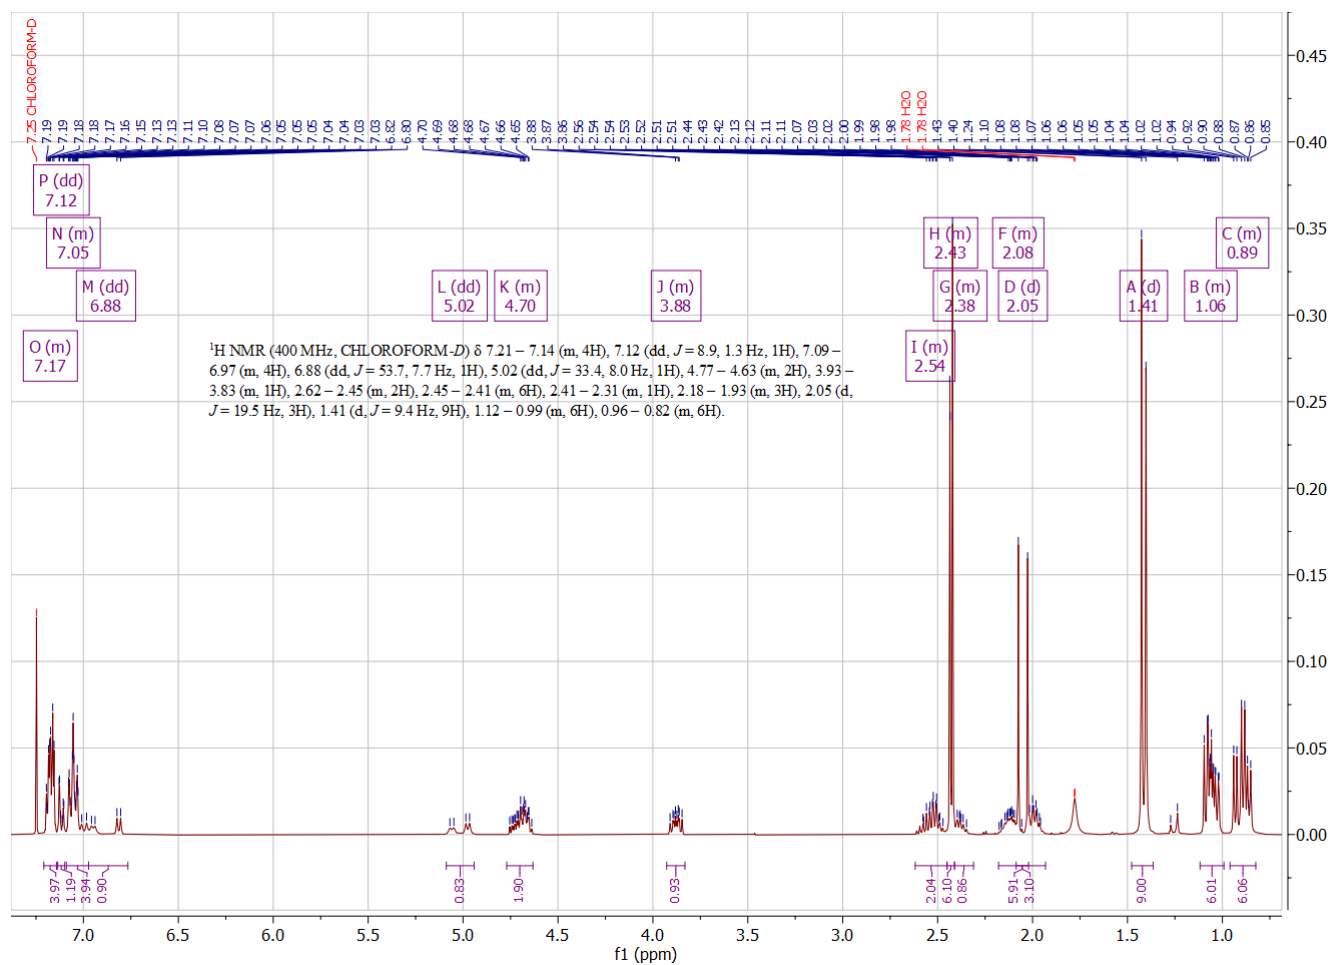

**(20) Boc-L-Val-D-Met-Val<sup>P</sup>(OPh-4-SCH<sub>3</sub>)<sub>2</sub>**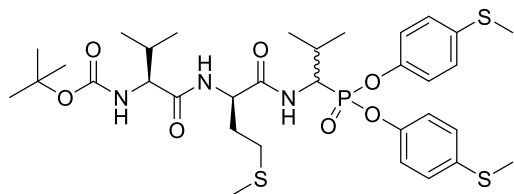

**Name:** *tert*-butyl ((2*S*)-1-(((2*R*)-1-((1-(bis(4-(methylthio)phenoxy)phosphoryl)-2-methylpropyl)amino)-4-(methylthio)-1-oxobutan-2-yl)amino)-3-methyl-1-oxobutan-2-yl)carbamate

<sup>31</sup>P NMR (162 MHz, Chloroform-*d*) δ 18.15 (s, 46%), 18.00 (s, 54%).

<sup>1</sup>H NMR (400 MHz, Chloroform-*d*) δ 7.22 – 7.01 (m, 9H, 8xArH, NH), 6.87 (dd, *J* = 21.5, 7.8 Hz, 1H, NH), 5.05 (dd, *J* = 42.1, 8.3 Hz, 1H, NH), 4.75 – 4.64 (m, 2H, CHP, CH), 3.98 – 3.85 (m, 1H, CH), 2.61 – 2.45 (m, 2H, CH<sub>2</sub>), 2.45 – 2.42 (m, 6H, , 2xSCH<sub>3</sub>), 2.42 – 2.32 (m, 1H, CH), 2.20 – 1.88 (m, 3H, CH<sub>2</sub>, CH), 2.04 (dd, *J* = 17.9, 0.9 Hz, 3H, CH<sub>3</sub>), 1.40 (d, *J* = 8.6 Hz, 9H, Boc), 1.11 – 0.98 (m, 6H, 2xCH<sub>3</sub>), 0.96 – 0.81 (m, 6H, 2xCH<sub>3</sub>).

**HRMS:** C<sub>33</sub>H<sub>50</sub>N<sub>3</sub>O<sub>7</sub>PS<sub>3</sub> [M+Na]<sup>+</sup> calc. 750.2446 found 750.2456

**HPLC:** purity >99%; retention time 18.843 and 19.030 min

**Chromatogram**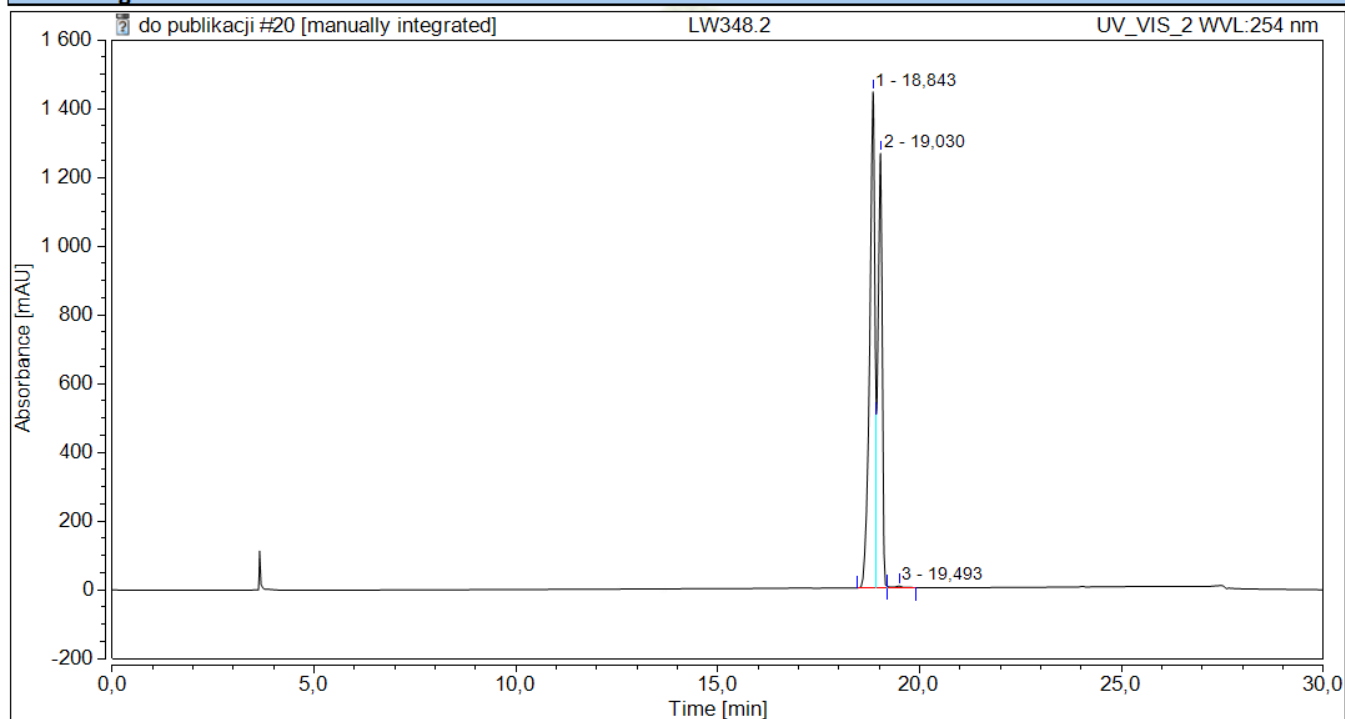**Integration Results**

| No.           | Peak Name | Retention Time<br>min | Area<br>mAU*min | Height<br>mAU   | Relative Area<br>% | Relative Height<br>% | Amount |
|---------------|-----------|-----------------------|-----------------|-----------------|--------------------|----------------------|--------|
| 1             |           | 18,843                | 217,010         | 1443,215        | 58,32              | 53,20                | n.a.   |
| 2             |           | 19,030                | 153,499         | 1264,124        | 41,25              | 46,60                | n.a.   |
| 3             |           | 19,493                | 1,607           | 5,578           | 0,43               | 0,21                 | n.a.   |
| <b>Total:</b> |           |                       | <b>372,116</b>  | <b>2712,917</b> | <b>100,00</b>      | <b>100,00</b>        |        |

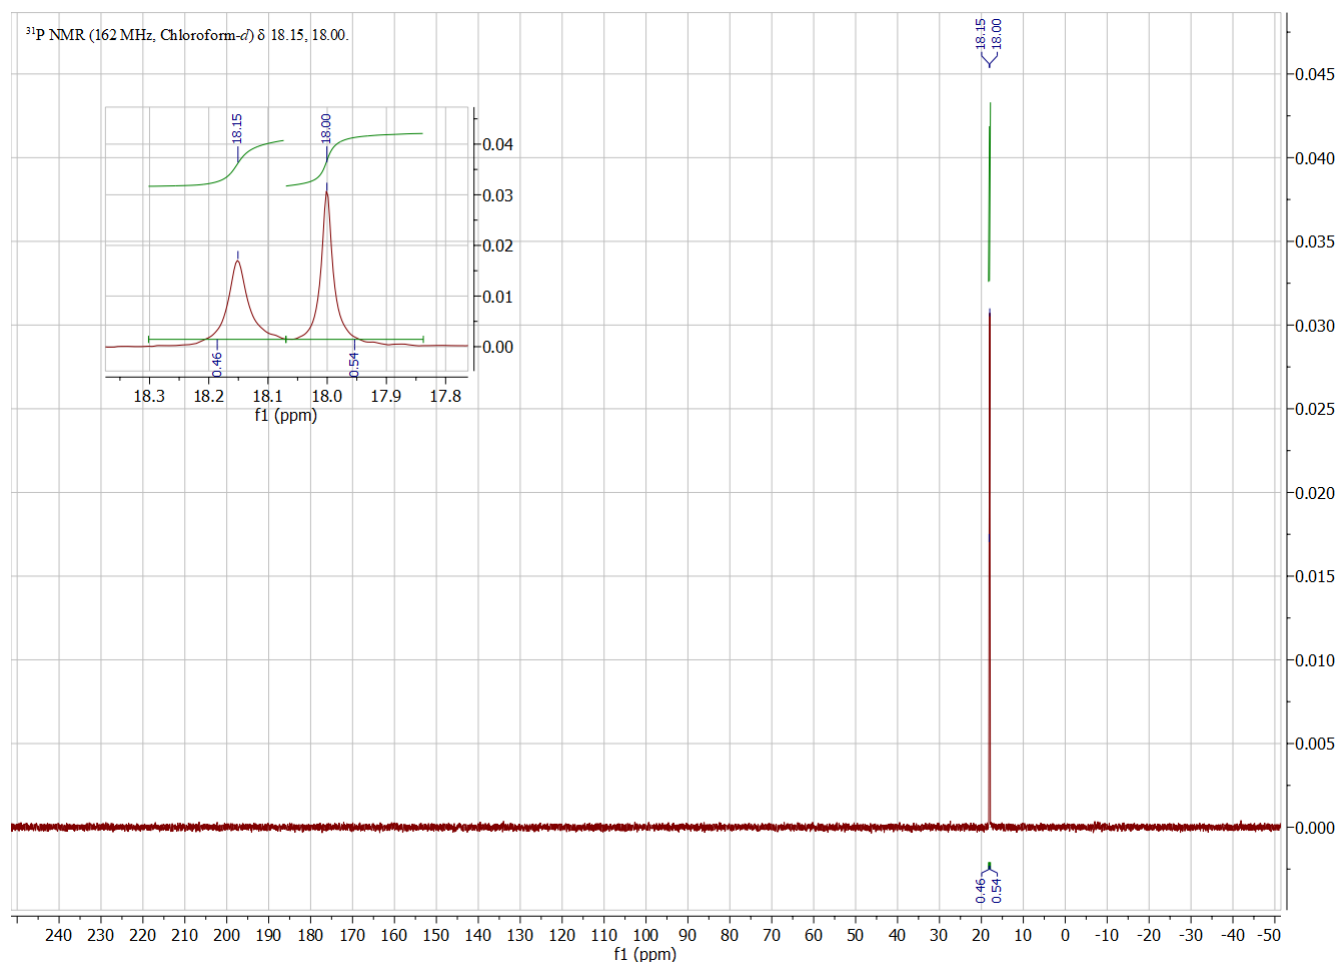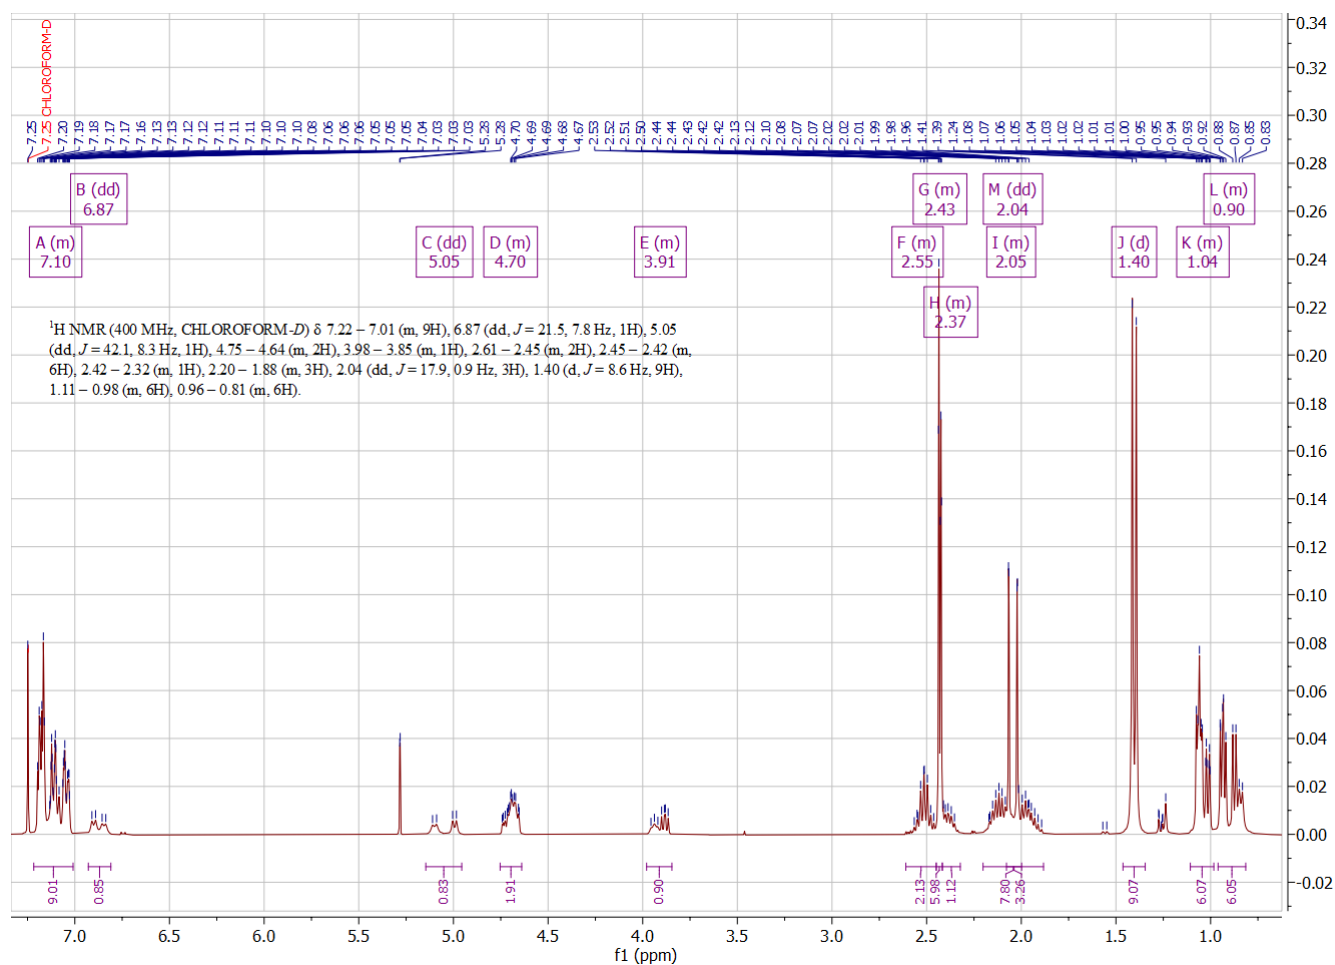

**(21) Boc-L-Val-L-Met(O)- Val<sup>P</sup>(OPh-4-SCH<sub>3</sub>)<sub>2</sub>**

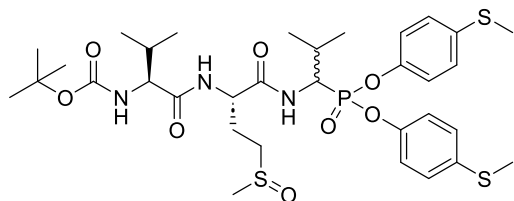

**Name:** *tert*-butyl ((2*S*)-1-(((2*S*)-1-((1-(bis(4-(methylthio)phenoxy)phosphoryl)-2-methylpropyl)amino)-4-(methylsulfinyl)-1-oxobutan-2-yl)amino)-3-methyl-1-oxobutan-2-yl)carbamate

**<sup>31</sup>P NMR** (162 MHz, Chloroform-*d*) δ 18.50 (s, 26%), 18.48 (s, 25%), 18.28 (s, 18%), 18.16 (s, 31%).

**<sup>1</sup>H NMR** (400 MHz, Chloroform-*d*) δ 8.06 – 7.41 (m, 1H, NH), 7.29 – 6.97 (m, 9H, 8xArH, NH), 5.23 – 5.09 (m, 1H, NH), 4.92 – 4.63 (m, 2H, CHP, CH), 3.99 – 3.85 (m, 1H, CH), 3.11 – 2.60 (m, 2H, CH<sub>2</sub>), 2.60 – 2.45 (m, 3H, CH<sub>3</sub>), 2.43 (dd, *J* = 3.8, 2.3 Hz, 6H, 2xSCH<sub>3</sub>), 2.42 – 1.98 (m, 4H, CH<sub>2</sub>, 2xCH), 1.41 (d, *J* = 9.9 Hz, 9H, Boc), 1.11 – 1.01 (m, 6H, 2xCH<sub>3</sub>), 0.95 – 0.85 (m, 6H, 2xCH<sub>3</sub>).

**HRMS:** C<sub>33</sub>H<sub>50</sub>N<sub>3</sub>O<sub>8</sub>PS<sub>3</sub> [M+Na]<sup>+</sup> calc. 766.2395 found 766.2402

**HPLC:** purity >99%; retention time 16.880 min

**Chromatogram**

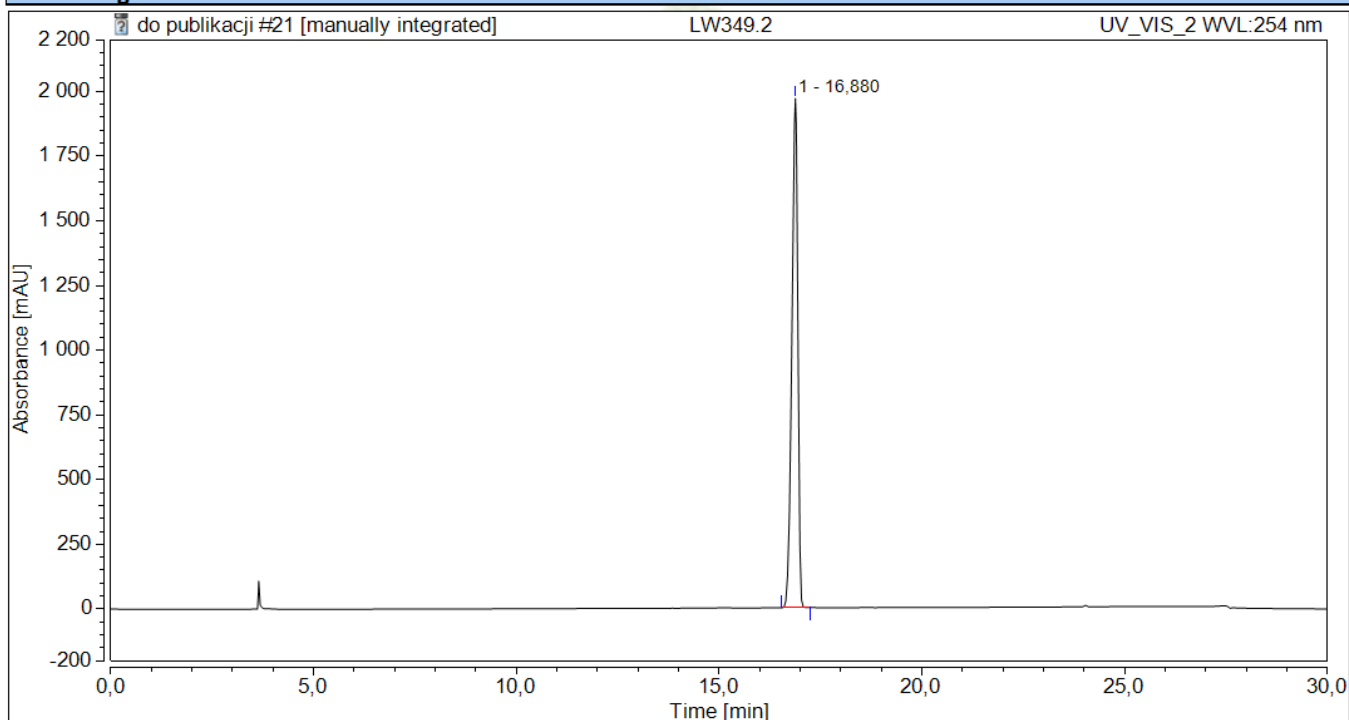

**Integration Results**

| No.           | Peak Name | Retention Time<br>min | Area<br>mAU*min | Height<br>mAU   | Relative Area<br>% | Relative Height<br>% | Amount<br>n.a. |
|---------------|-----------|-----------------------|-----------------|-----------------|--------------------|----------------------|----------------|
| 1             |           | 16,880                | 331,419         | 1967,646        | 100,00             | 100,00               | n.a.           |
| <b>Total:</b> |           |                       | <b>331,419</b>  | <b>1967,646</b> | <b>100,00</b>      | <b>100,00</b>        |                |

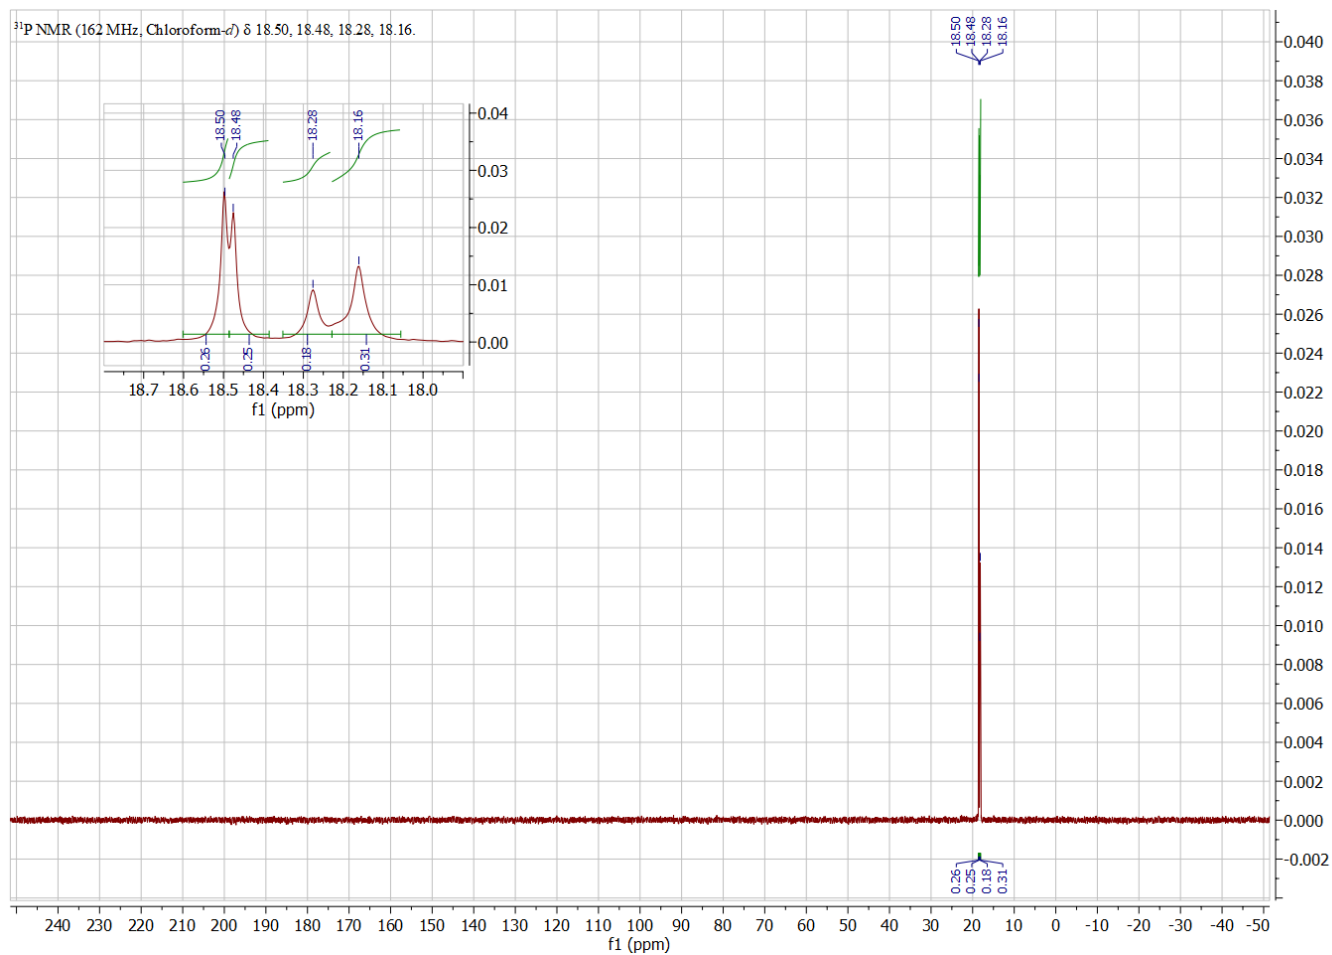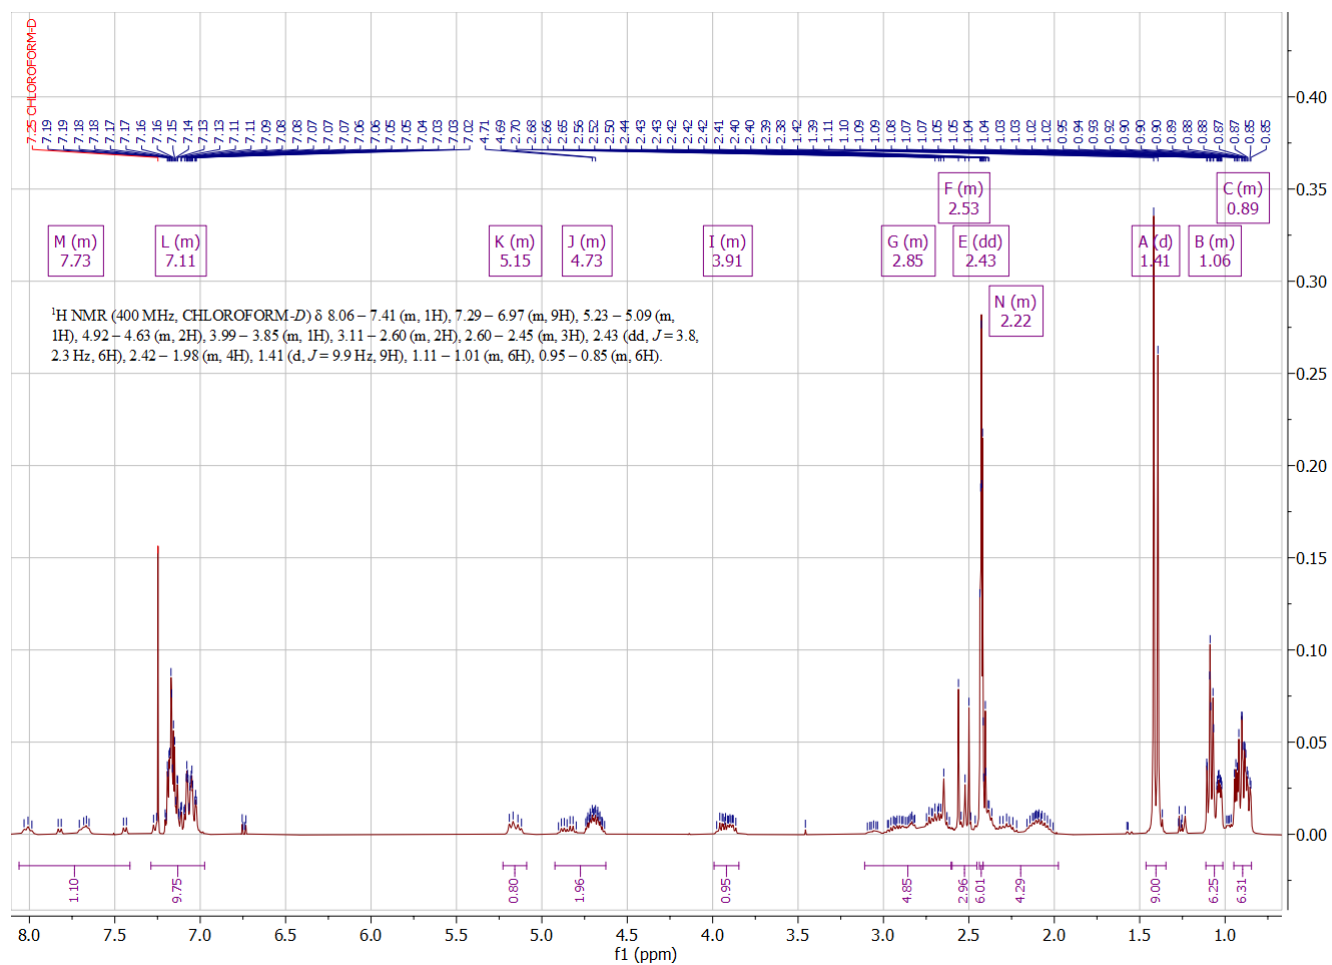

**(22) Boc-L-Val-L-Met(O<sub>2</sub>)- Val<sup>P</sup>(OPh-4-SCH<sub>3</sub>)<sub>2</sub>**

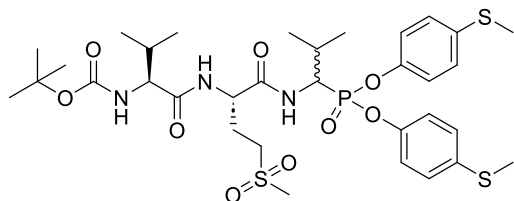

**Name:** *tert*-butyl ((2*S*)-1-(((2*S*)-1-((1-(bis(4-(methylthio)phenoxy)phosphoryl)-2-methylpropyl)amino)-4-(methylsulfonyl)-1-oxobutan-2-yl)amino)-3-methyl-1-oxobutan-2-yl)carbamate

**<sup>31</sup>P NMR** (162 MHz, Chloroform-*d*) δ 18.06 (s, 52%), 17.73 (s, 48%).

**<sup>1</sup>H NMR** (400 MHz, Chloroform-*d*) δ 7.56 (dd, *J* = 50.6, 10.2 Hz, 1H, NH), 7.23 – 6.95 (m, 9H, 8xArH, NH), 5.19 (dd, *J* = 49.4, 7.6 Hz, 1H, NH), 4.87 – 4.62 (m, 2H, CHP, CH), 3.93 – 3.80 (m, 1H, CH), 3.29 – 3.03 (m, 2H, CH<sub>2</sub>), 2.85 (d, *J* = 27.7 Hz, 3H, CH<sub>3</sub>), 2.42 (d, *J* = 2.8 Hz, 6H, 2xSCH<sub>3</sub>), 2.39 – 2.31 (m, 1H, CH), 2.30 – 2.13 (m, 2H, CH<sub>2</sub>), 2.13 – 2.00 (m, 1H, CH), 1.41 (d, *J* = 8.4 Hz, 9H, Boc), 1.14 – 0.99 (m, 6H, 2xCH<sub>3</sub>), 0.96 – 0.77 (m, 6H, 2xCH<sub>3</sub>).

**HRMS:** C<sub>33</sub>H<sub>50</sub>N<sub>3</sub>O<sub>9</sub>PS<sub>3</sub> [M+Na]<sup>+</sup> calc. 782.2344 found 782.2357

**HPLC:** purity >99%; retention time 17.573 min

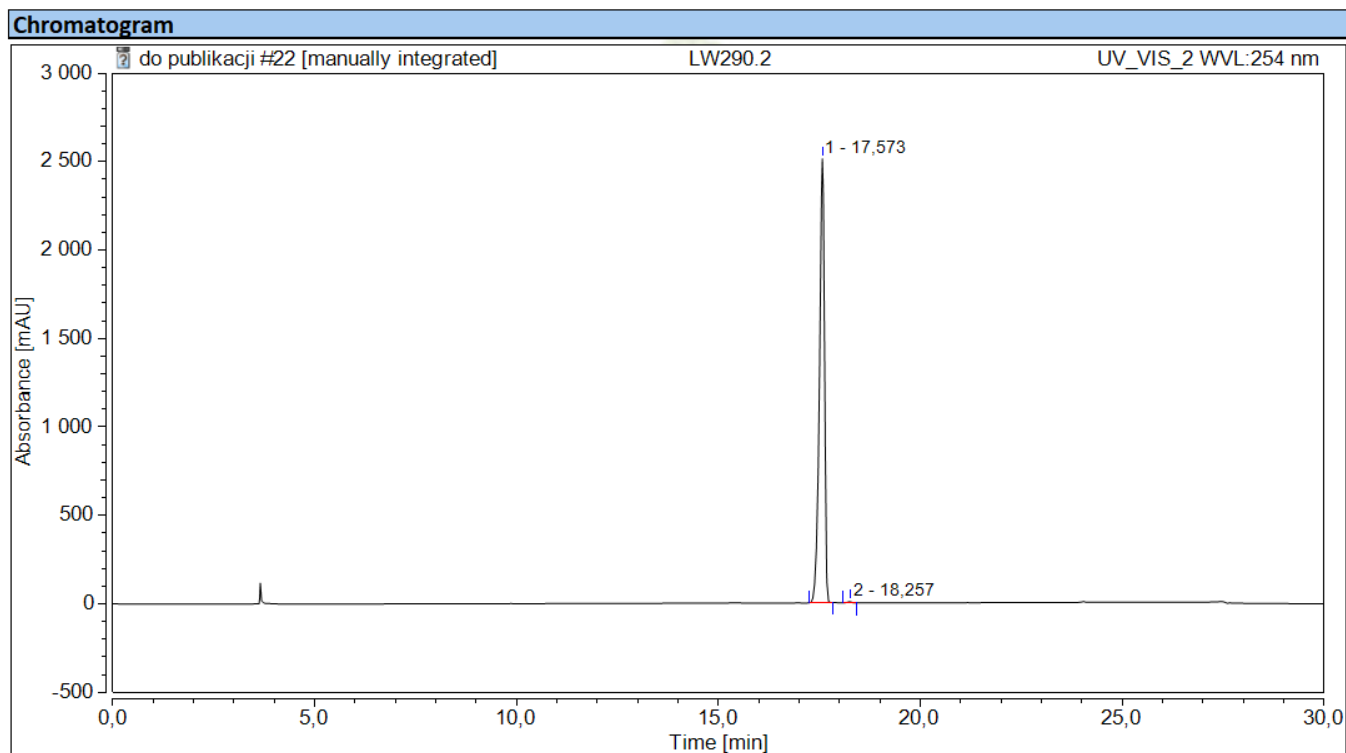

| Integration Results |           |                       |                 |               |                    |                      |                |
|---------------------|-----------|-----------------------|-----------------|---------------|--------------------|----------------------|----------------|
| No.                 | Peak Name | Retention Time<br>min | Area<br>mAU*min | Height<br>mAU | Relative Area<br>% | Relative Height<br>% | Amount<br>n.a. |
| 1                   |           | 17,573                | 362,729         | 2509,071      | 99,78              | 99,71                | n.a.           |
| 2                   |           | 18,257                | 0,808           | 7,248         | 0,22               | 0,29                 | n.a.           |
| Total:              |           |                       | 363,536         | 2516,319      | 100,00             | 100,00               |                |

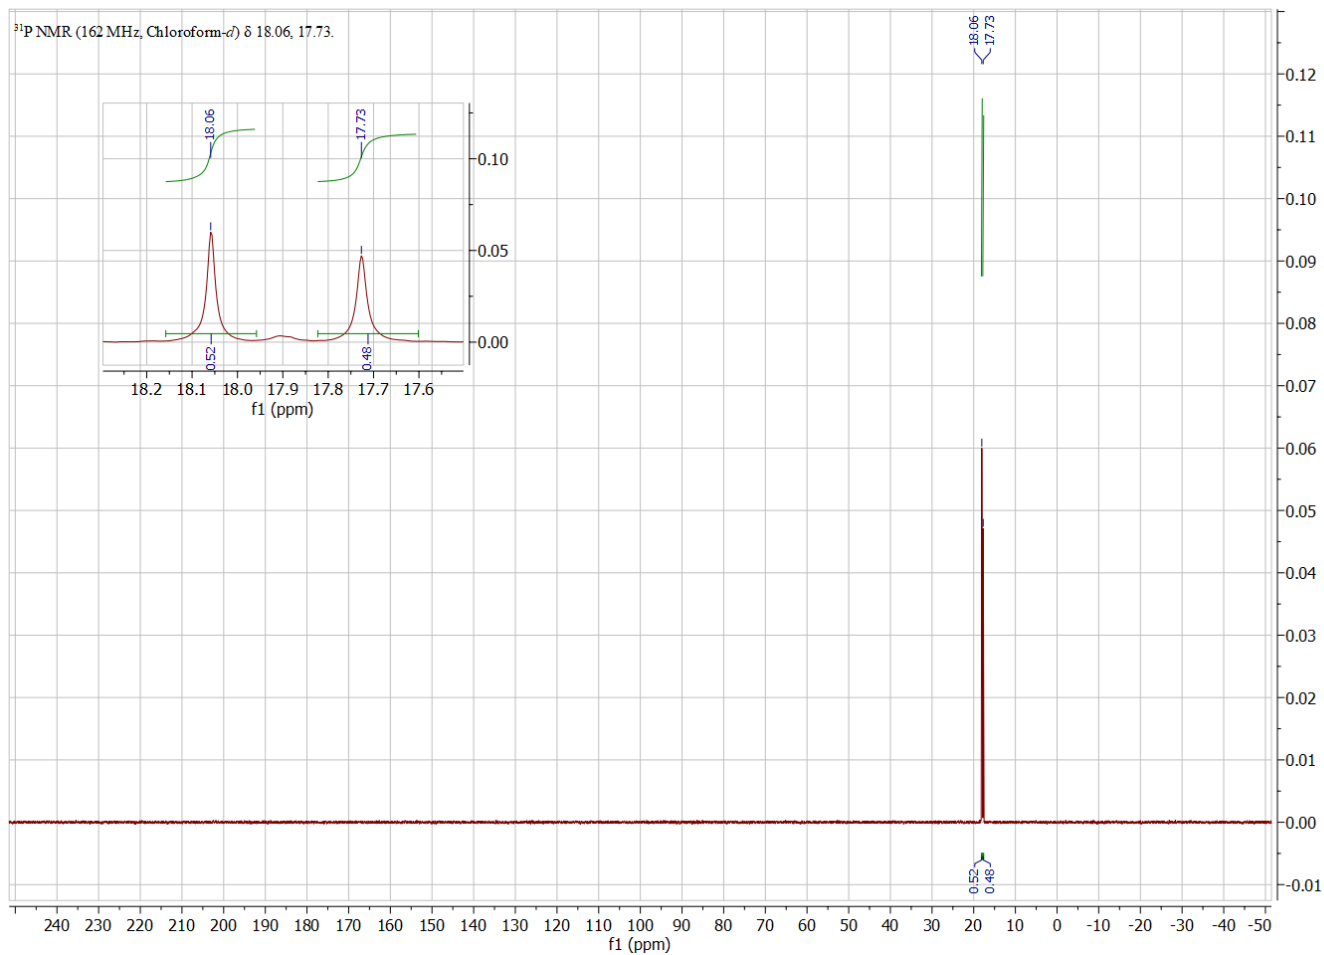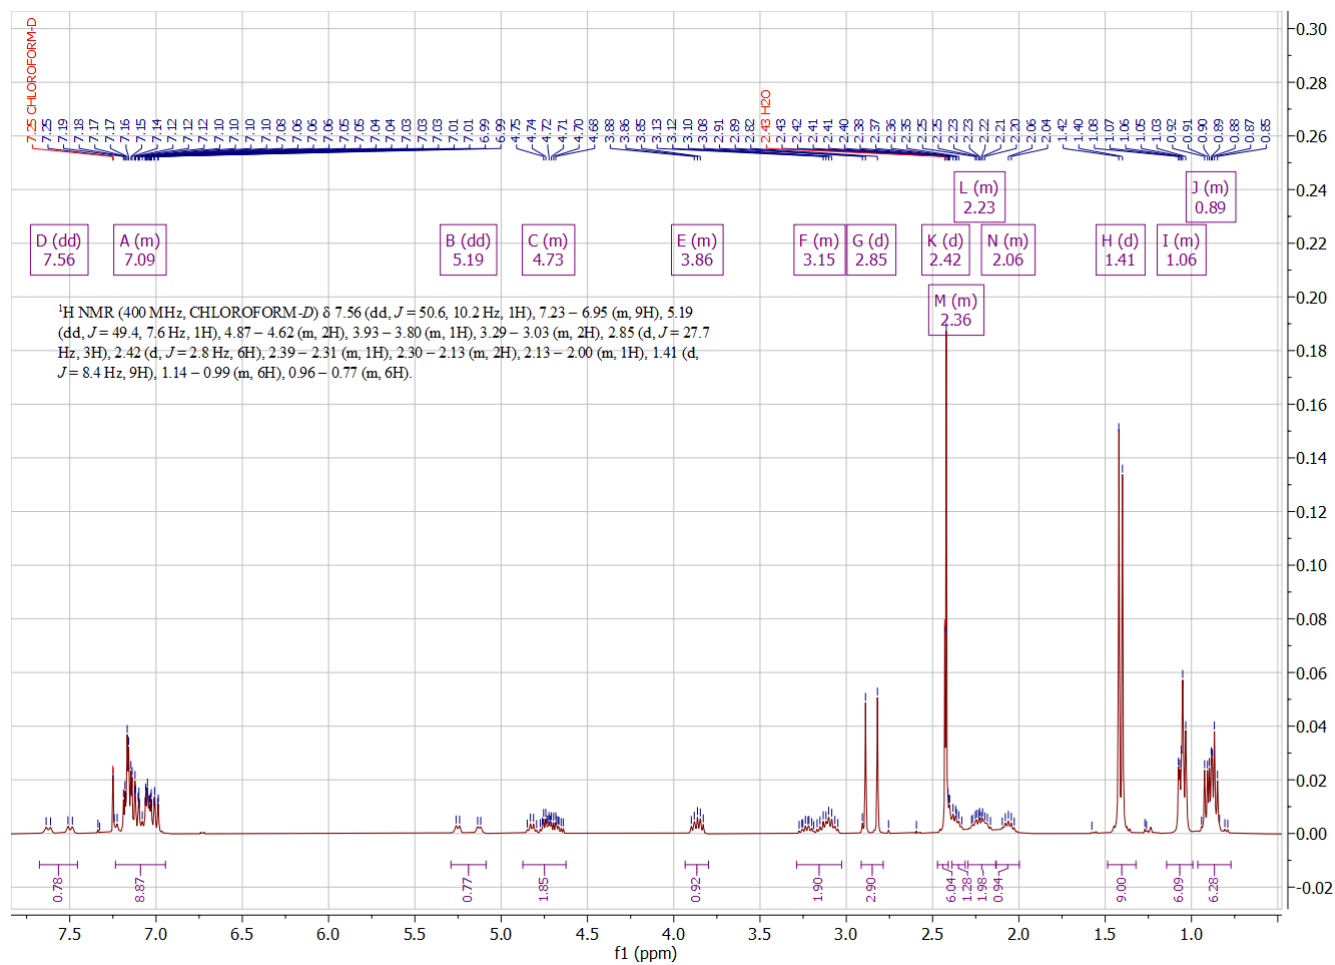



**(23) Boc-L-Val-L-Ser(Bzl)-Val<sup>P</sup>(OPh-4-SCH<sub>3</sub>)<sub>2</sub>**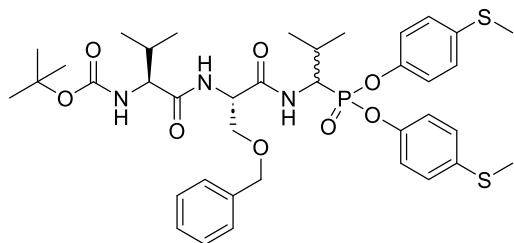

**Name:** *tert*-butyl ((2*S*)-1-(((2*S*)-3-(benzyloxy)-1-((1-(bis(4-(methylthio)phenoxy)phosphoryl)-2-methylpropyl)amino)-1-oxopropan-2-yl)amino)-3-methyl-1-oxobutan-2-yl)carbamate

<sup>31</sup>P NMR (162 MHz, Chloroform-*d*) δ 18.15 (s, 36%), 18.04 (s, 14%), 17.93 (s, 50%).

<sup>1</sup>H NMR (400 MHz, Chloroform-*d*) δ 7.32 – 7.25 (m, 5H, 5xArH), 7.20 – 6.90 (m, 9H, 8xArH, NH), 6.87 – 6.75 (m, 1H, NH), 5.09 – 4.90 (m, 1H, NH), 4.79 – 4.64 (m, 1H, CHP), 4.64 – 4.46 (m, 3H, CH<sub>2</sub>, CH), 3.99 – 3.87 (m, 2H, CH<sub>2</sub>), 3.58 – 3.42 (m, 1H, CH), 2.42 (d, *J* = 1.9 Hz, 6H, 2xSCH<sub>3</sub>), 2.41 – 2.30 (m, 1H, CH), 2.26 – 2.05 (m, 1H, CH), 1.43 – 1.36 (m, 9H, Boc), 1.06 – 0.84 (m, 12H, 4xCH<sub>3</sub>).

**HRMS:** C<sub>38</sub>H<sub>52</sub>N<sub>3</sub>O<sub>8</sub>PS<sub>2</sub> [M+Na]<sup>+</sup> calc. 796.2831 found 796.2838

**HPLC:** purity >99%; retention time 19.817 and 19.940 min

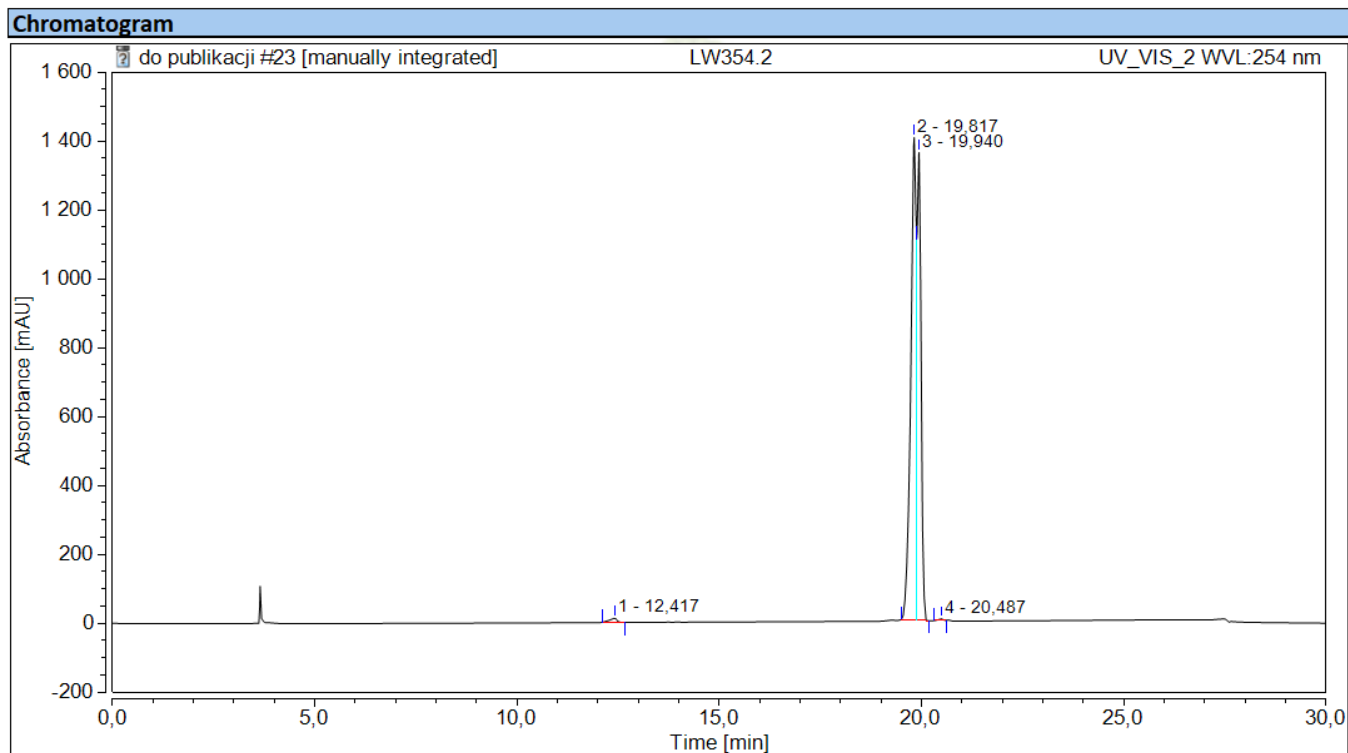

| Integration Results |           |                    |                |                 |                 |                   |             |
|---------------------|-----------|--------------------|----------------|-----------------|-----------------|-------------------|-------------|
| No.                 | Peak Name | Retention Time min | Area mAU*min   | Height mAU      | Relative Area % | Relative Height % | Amount n.a. |
| 1                   |           | 12,417             | 2,569          | 12,368          | 0,69            | 0,45              | n.a.        |
| 2                   |           | 19,817             | 214,920        | 1400,877        | 57,64           | 50,47             | n.a.        |
| 3                   |           | 19,940             | 154,836        | 1358,220        | 41,52           | 48,93             | n.a.        |
| 4                   |           | 20,487             | 0,559          | 4,434           | 0,15            | 0,16              | n.a.        |
| <b>Total:</b>       |           |                    | <b>372,883</b> | <b>2775,899</b> | <b>100,00</b>   | <b>100,00</b>     |             |

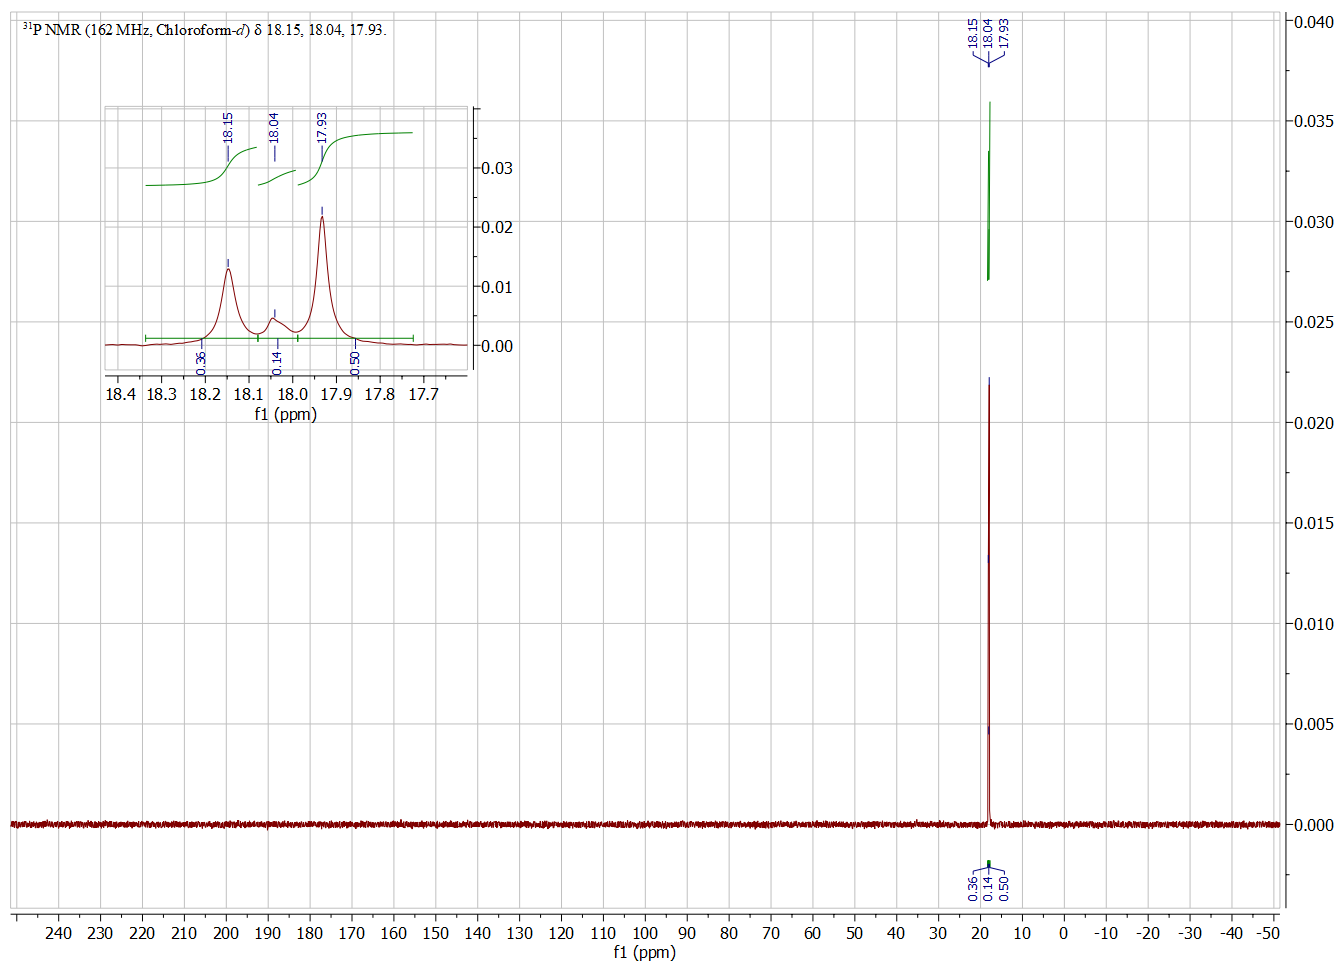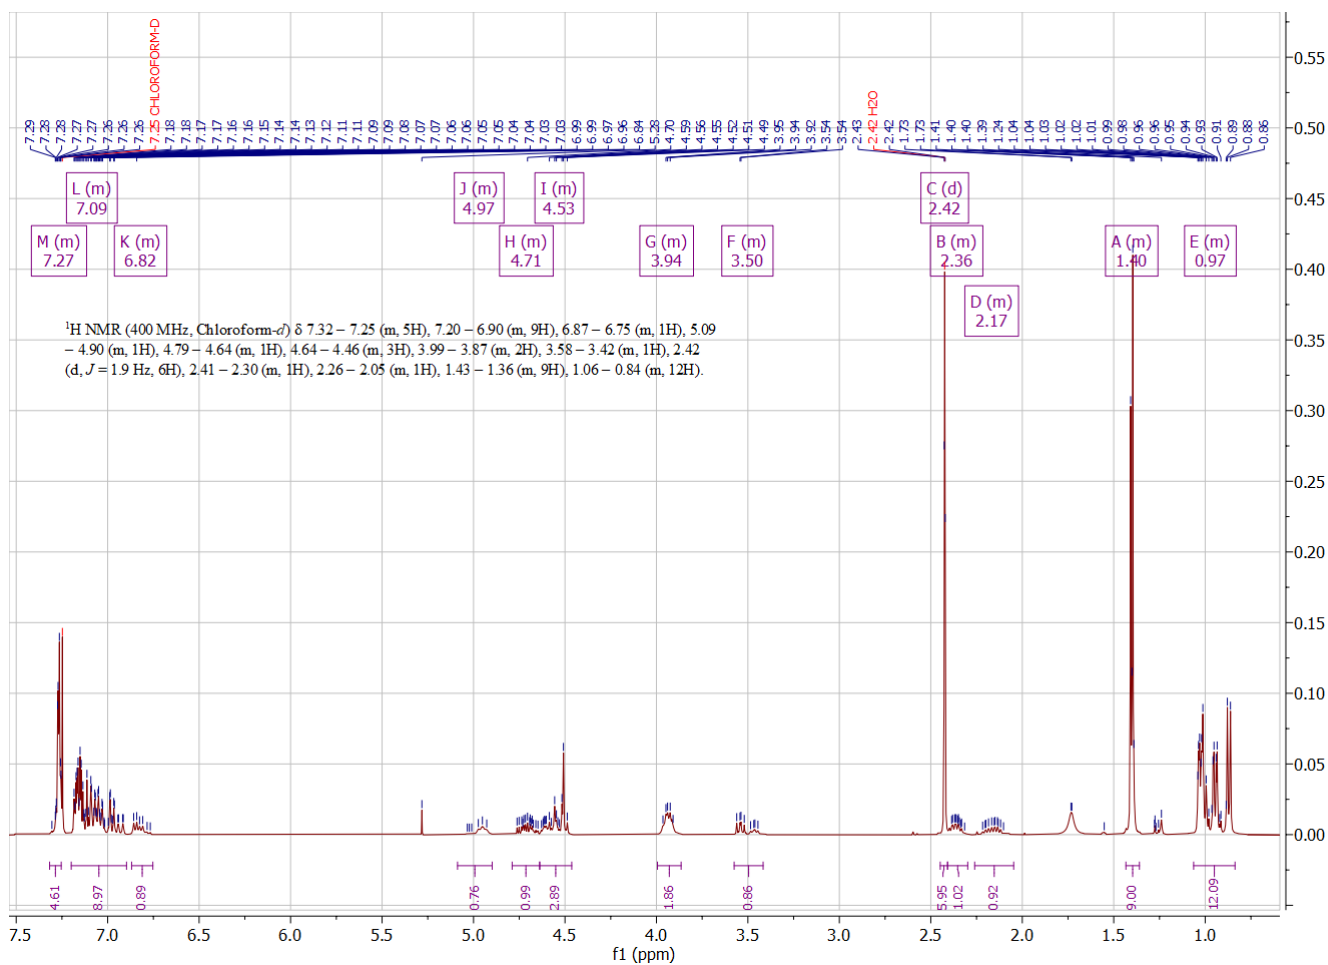

**(24) Boc-L-Val-D-Ser(Bzl)-Val<sup>P</sup>(OPh-4-SCH<sub>3</sub>)<sub>2</sub>**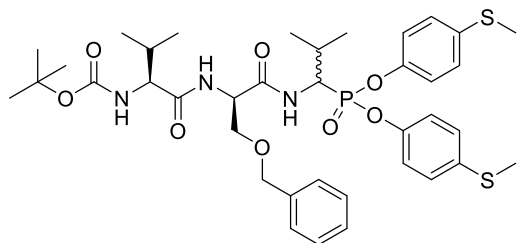

**Name:** *tert*-butyl ((2*S*)-1-(((2*R*)-3-(benzyloxy)-1-((1-(bis(4-(methylthio)phenoxy)phosphoryl)-2-methylpropyl)amino)-1-oxopropan-2-yl)amino)-3-methyl-1-oxobutan-2-yl)carbamate

<sup>31</sup>P NMR (162 MHz, Chloroform-*d*) δ 18.04 (s, 51%), 18.00 (s, 49%).

<sup>1</sup>H NMR (400 MHz, Chloroform-*d*) δ 7.29 – 7.24 (m, 5H, 5×ArH), 7.24 – 6.93 (m, 9H, 8×ArH, NH), 6.81 (dd, *J* = 21.8, 6.9 Hz, 1H, NH), 5.07 – 4.93 (m, 1H, NH), 4.77 – 4.65 (m, 1H, CHP), 4.65 – 4.45 (m, 3H, CH<sub>2</sub>, CH), 4.01 – 3.83 (m, 2H, CH<sub>2</sub>), 3.57 – 3.39 (m, 1H, CH), 2.46 – 2.40 (m, 6H, 2×SCH<sub>3</sub>), 2.40 – 2.31 (m, 1H, CH), 2.19 – 2.01 (m, 1H, CH), 1.39 (d, *J* = 4.4 Hz, 9H, Boc), 1.06 – 0.83 (m, 12H, 4×CH<sub>3</sub>).

**HRMS:** C<sub>38</sub>H<sub>52</sub>N<sub>3</sub>O<sub>8</sub>PS<sub>2</sub> [M+Na]<sup>+</sup> calc. 796.2831 found 796.2821

**HPLC:** purity >98%; retention time 19.850 and 20.010 min

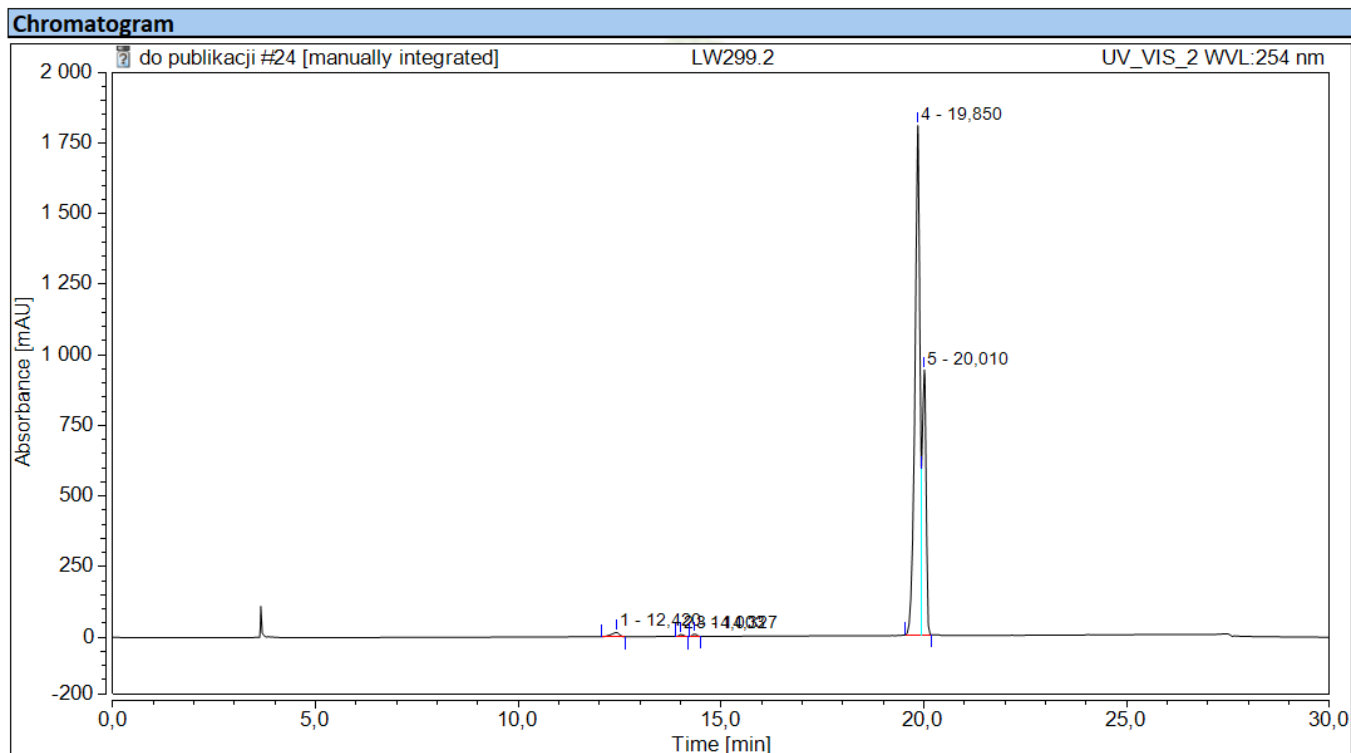

| Integration Results |           |                    |                |                 |                 |                   |             |
|---------------------|-----------|--------------------|----------------|-----------------|-----------------|-------------------|-------------|
| No.                 | Peak Name | Retention Time min | Area mAU*min   | Height mAU      | Relative Area % | Relative Height % | Amount n.a. |
| 1                   |           | 12,420             | 3,485          | 15,880          | 0,96            | 0,57              | n.a.        |
| 2                   |           | 14,003             | 0,816          | 6,782           | 0,23            | 0,24              | n.a.        |
| 3                   |           | 14,327             | 1,032          | 8,124           | 0,29            | 0,29              | n.a.        |
| 4                   |           | 19,850             | 251,688        | 1802,596        | 69,69           | 65,05             | n.a.        |
| 5                   |           | 20,010             | 104,145        | 937,750         | 28,84           | 33,84             | n.a.        |
| <b>Total:</b>       |           |                    | <b>361,166</b> | <b>2771,133</b> | <b>100,00</b>   | <b>100,00</b>     |             |

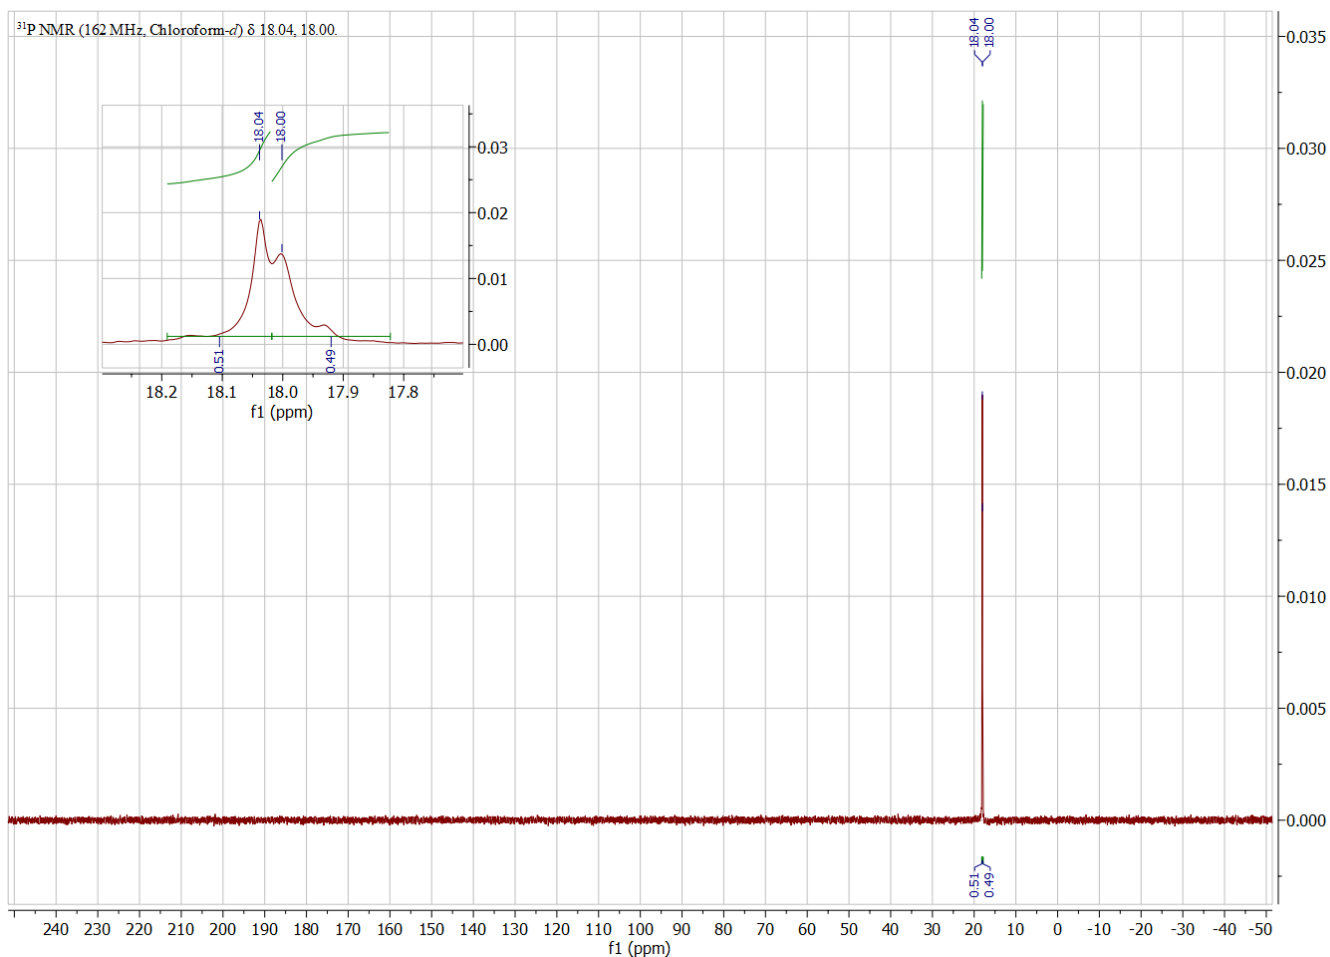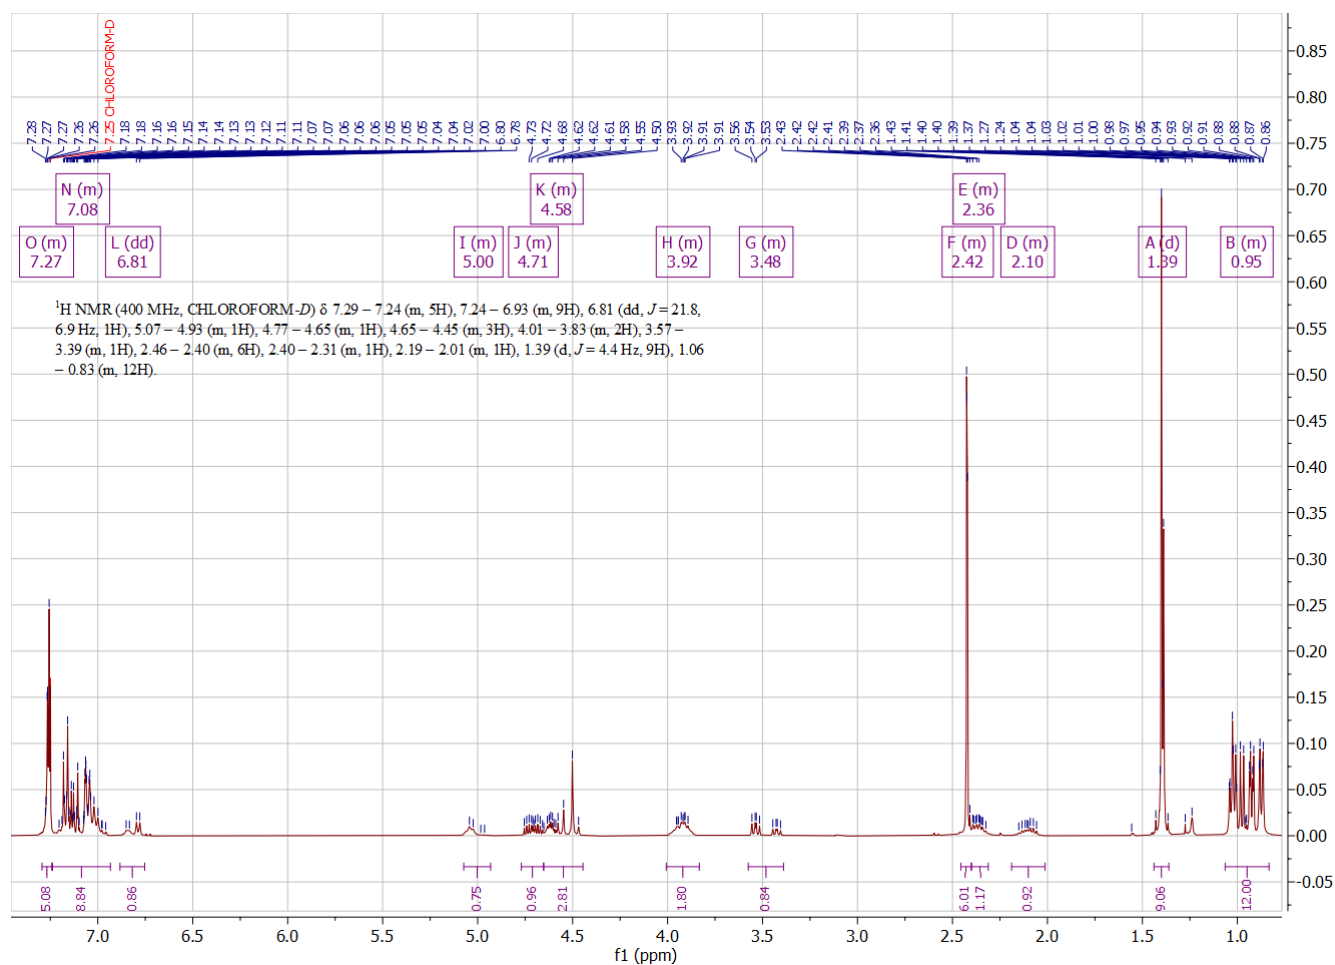

**(25) Boc-L-Val-L-Thr(Bzl)-Val<sup>P</sup>(OPh-4-SCH<sub>3</sub>)<sub>2</sub>**

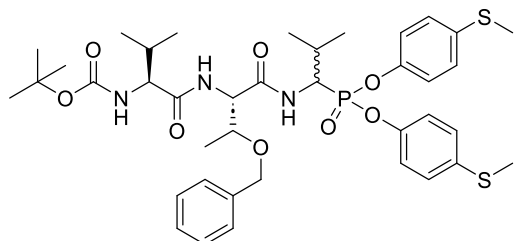

**Name:** *tert*-butyl ((2S)-1-(((2S,3S)-3-(benzyloxy)-1-((1-(bis(4-(methylthio)phenoxy)phosphoryl)-2-methylpropyl)amino)-1-oxobutan-2-yl)amino)-3-methyl-1-oxobutan-2-yl)carbamate

<sup>31</sup>P NMR (162 MHz, Chloroform-d) δ 18.45 (s, 46%), 17.94 (s, 54%).

<sup>1</sup>H NMR (400 MHz, Chloroform-d) δ 7.33 – 6.91 (m, 15H, 13xArH, 2xNH), 4.97 (d, *J* = 5.5 Hz, 1H, NH), 4.78 – 4.48 (m, 4H, CH<sub>2</sub>, CHP, CH), 4.31 – 4.18 (m, 1H, CH), 4.01 – 3.92 (m, 1H, CH), 2.47 – 2.41 (m, 6H, 2xSCH<sub>3</sub>), 2.41 – 2.30 (m, 1H, CH), 2.26 – 2.11 (m, 1H, CH), 1.40 (d, *J* = 3.8 Hz, 9H, Boc), 1.19 (dd, *J* = 10.4, 6.5 Hz, CH<sub>3</sub>), 1.07 – 0.88 (m, 12H, 4xCH<sub>3</sub>).

**HRMS:** C<sub>39</sub>H<sub>54</sub>N<sub>3</sub>O<sub>8</sub>PS<sub>2</sub> [M+Na]<sup>+</sup> calc. 810.2988 found 810.3001

**HPLC:** purity >99%; retention time 20.493 min

**Chromatogram**

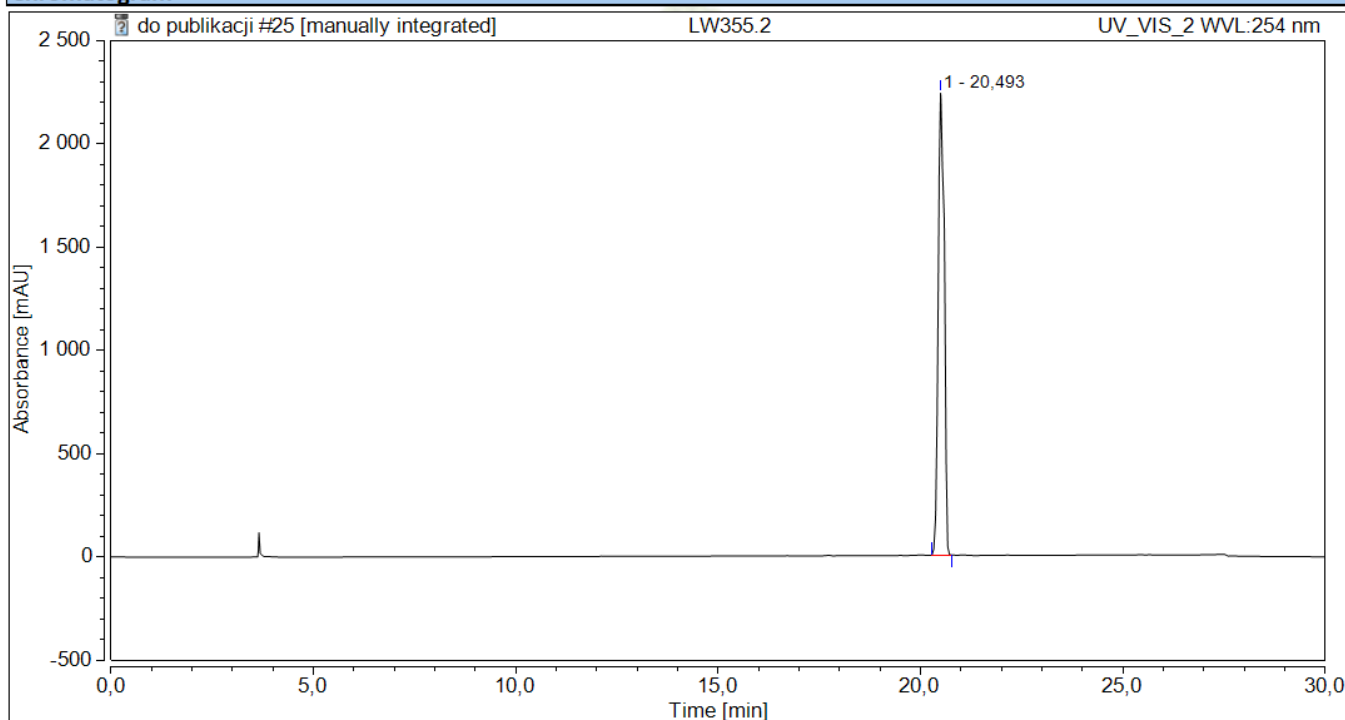

**Integration Results**

| No.           | Peak Name | Retention Time<br>min | Area<br>mAU*min | Height<br>mAU   | Relative Area<br>% | Relative Height<br>% | Amount<br>n.a. |
|---------------|-----------|-----------------------|-----------------|-----------------|--------------------|----------------------|----------------|
| 1             |           | 20,493                | 388,048         | 2235,403        | 100,00             | 100,00               | n.a.           |
| <b>Total:</b> |           |                       | <b>388,048</b>  | <b>2235,403</b> | <b>100,00</b>      | <b>100,00</b>        |                |

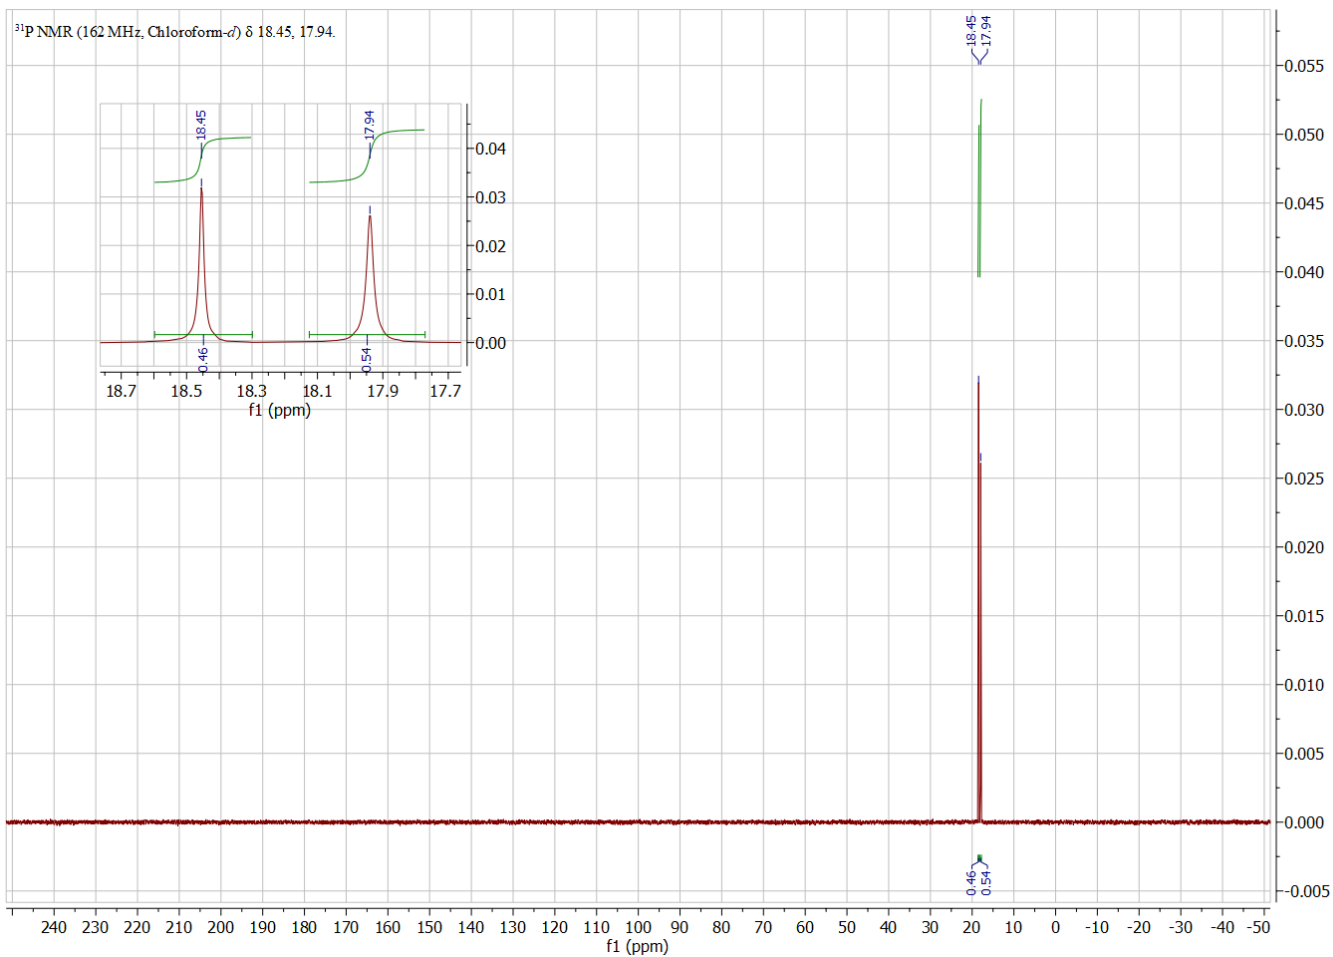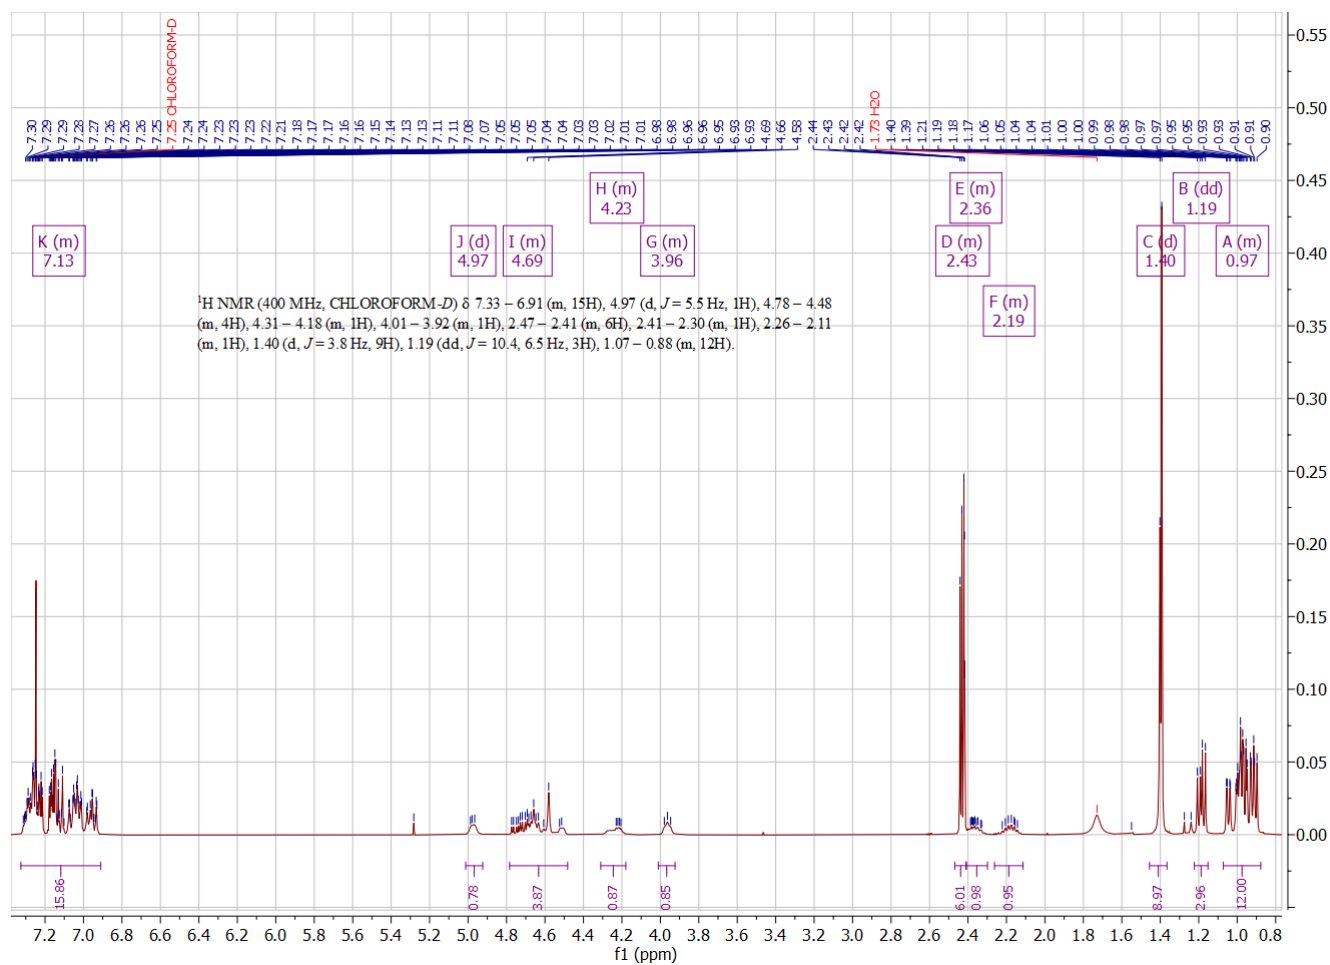

**(26) Boc-L-Val-D-Thr(Bzl)- Val<sup>P</sup>(OPh-4-SCH<sub>3</sub>)<sub>2</sub>**

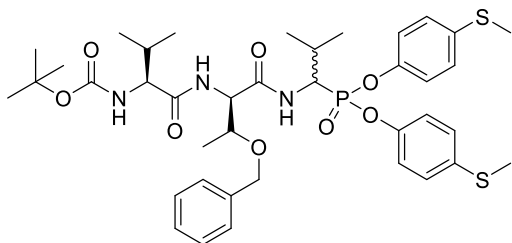

**Name:** *tert*-butyl ((2*S*)-1-(((2*R*,3*R*)-3-(benzyloxy)-1-((1-(bis(4-(methylthio)phenoxy)phosphoryl)-2-methylpropyl)amino)-1-oxobutan-2-yl)amino)-3-methyl-1-oxobutan-2-yl)carbamate

<sup>31</sup>P NMR (162 MHz, Chloroform-*d*) δ 18.43 (s, 69%), 18.00 (s, 31%).

<sup>1</sup>H NMR (400 MHz, Chloroform-*d*) δ 7.34 – 7.25 (m, 4H, 3xArH, NH), 7.24 – 6.85 (m, 11H, 10xArH, NH), 5.02 (d, *J* = 8.0 Hz, 1H, NH), 4.78 – 4.48 (m, 4H, CH<sub>2</sub>, CHP, CH), 4.28 – 4.16 (m, 1H, CH), 4.05 – 3.92 (m, 1H, CH), 2.45 – 2.40 (m, 6H, 2xSCH<sub>3</sub>), 2.40 – 2.30 (m, 1H, CH), 2.22 – 2.07 (m, 1H, CH), 1.40 (d, *J* = 1.9 Hz, 9H, Boc), 1.18 (dd, *J* = 7.3, 6.5 Hz, 3H, CH<sub>3</sub>), 1.03 – 0.85 (m, 12H, 4xCH<sub>3</sub>).

**HRMS:** C<sub>39</sub>H<sub>54</sub>N<sub>3</sub>O<sub>8</sub>PS<sub>2</sub> [M+Na]<sup>+</sup> calc. 810.2988 found 810.3005

**HPLC:** purity >99%; retention time 20.473 and 20.573 min

**Chromatogram**

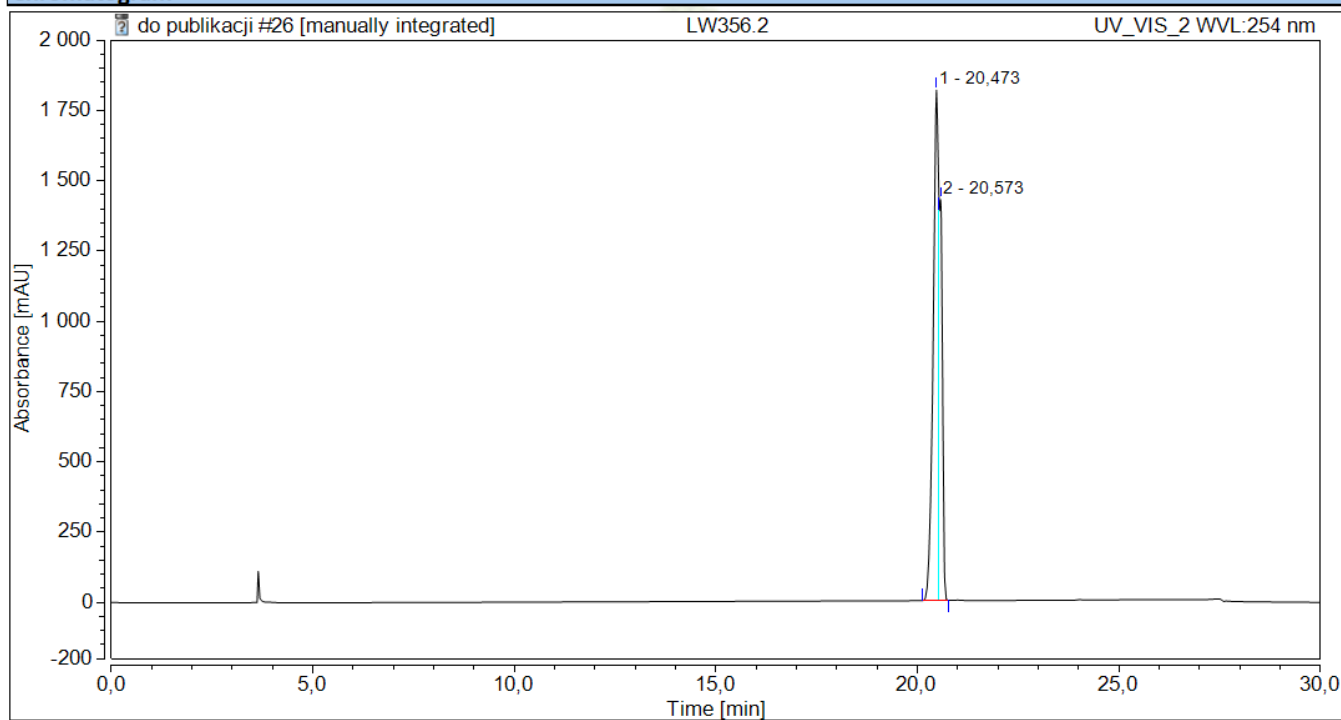

**Integration Results**

| No.           | Peak Name | Retention Time<br>min | Area<br>mAU*min | Height<br>mAU   | Relative Area<br>% | Relative Height<br>% | Amount<br>n.a. |
|---------------|-----------|-----------------------|-----------------|-----------------|--------------------|----------------------|----------------|
| 1             |           | 20,473                | 280,574         | 1814,893        | 68,58              | 56,01                | n.a.           |
| 2             |           | 20,573                | 128,523         | 1425,596        | 31,42              | 43,99                | n.a.           |
| <b>Total:</b> |           |                       | <b>409,097</b>  | <b>3240,489</b> | <b>100,00</b>      | <b>100,00</b>        |                |

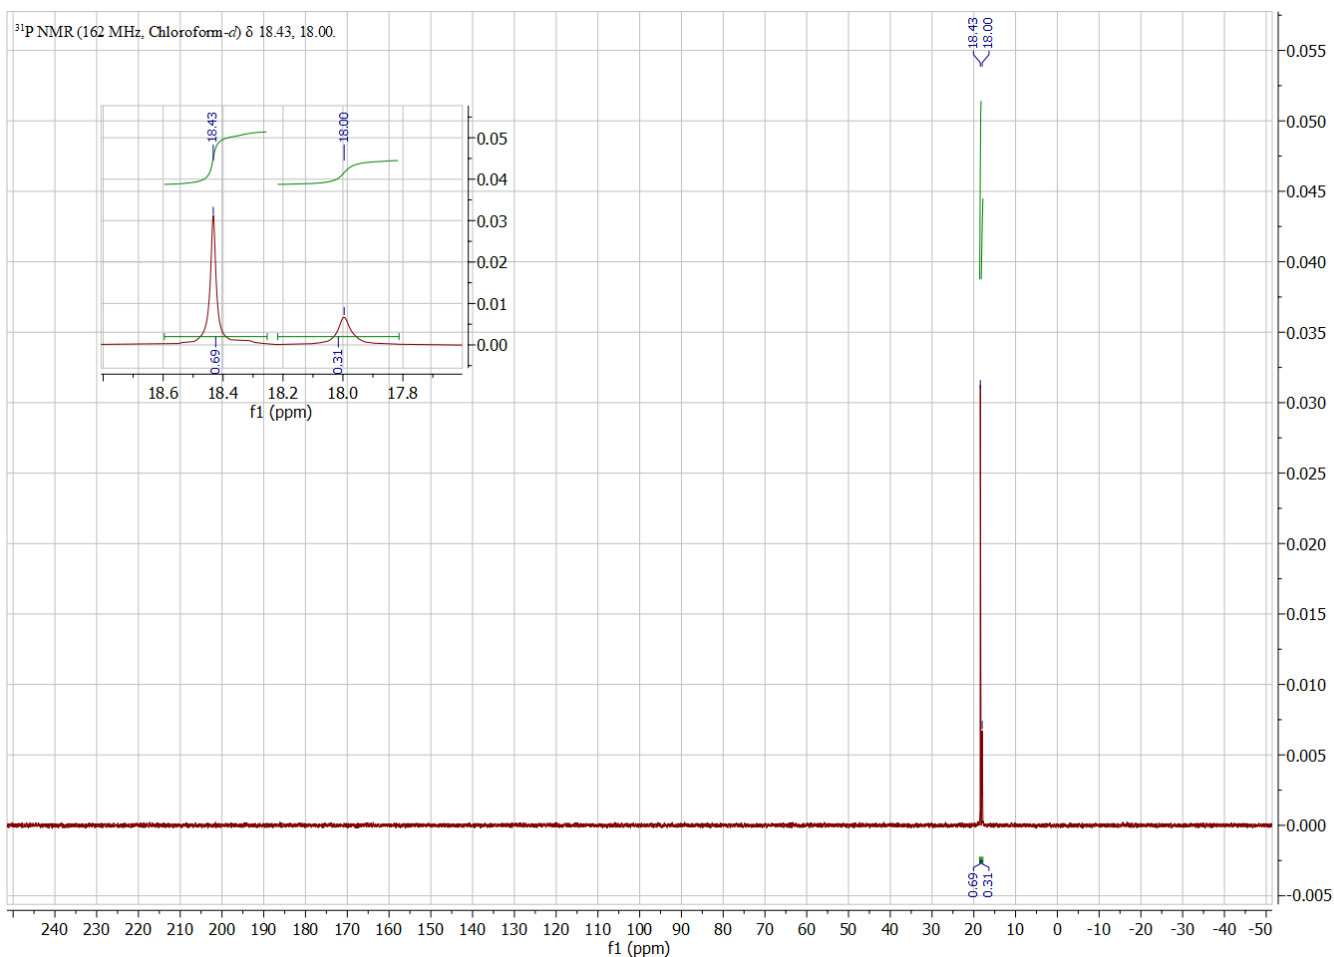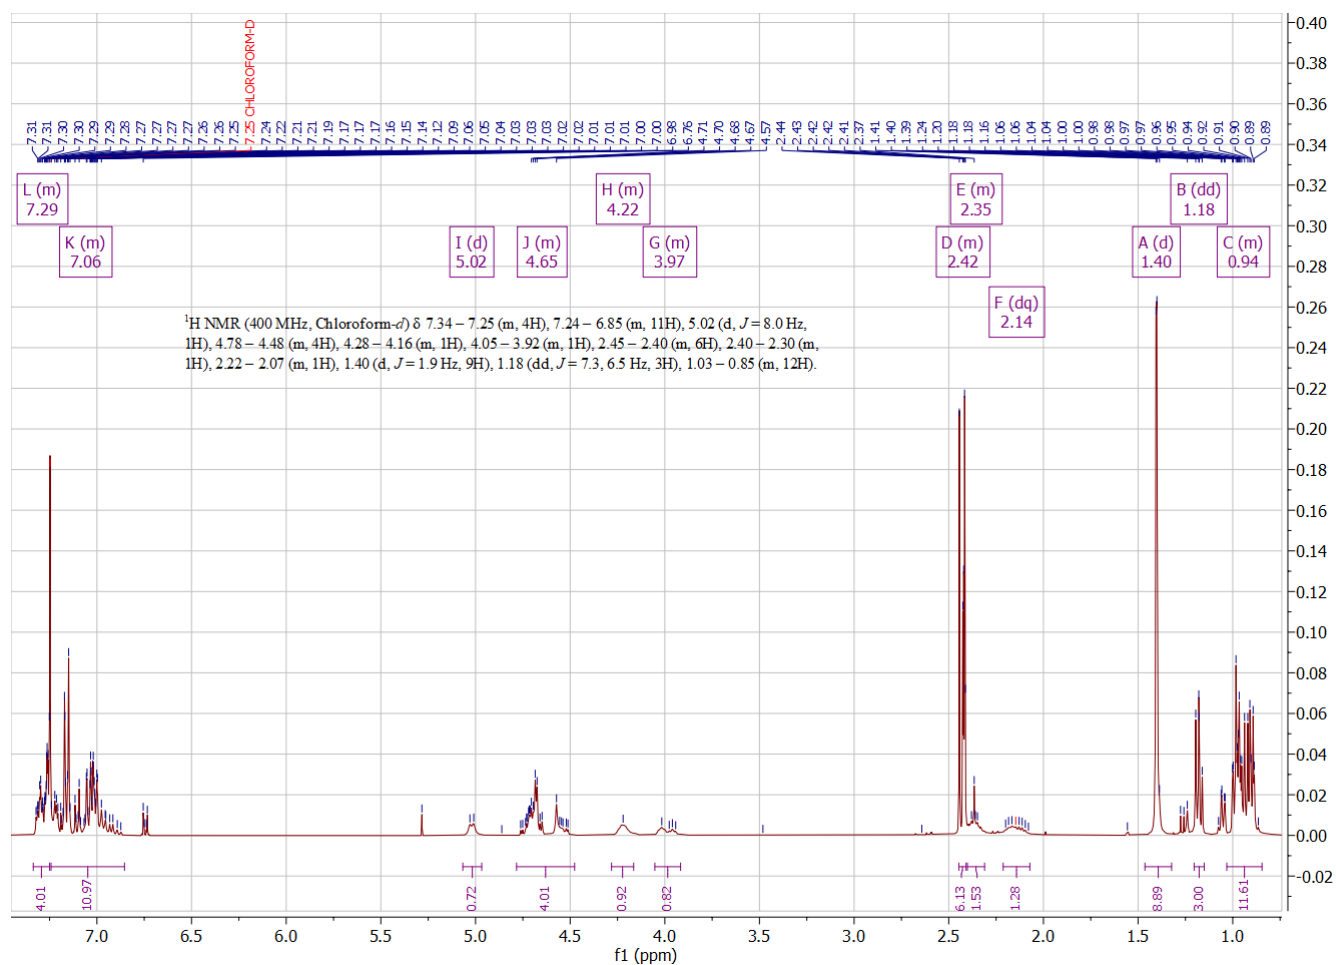



**(27) Boc-L-Val-L-Pro-Val<sup>P</sup>(OPh-4-SCH<sub>3</sub>)<sub>2</sub>**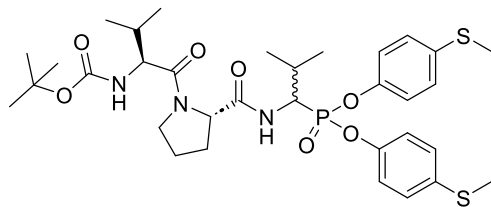

Reference compound, analytical data from our previous publication: Winiarski, Ł.; Oleksyszyn, J.; Sieńczyk, M. Human neutrophil elastase phosphonic inhibitors with improved potency of action. *J. Med. Chem.* **2012**, *55*, 6541–6553.

**Name:** *tert*-butyl ((2*S*)-1-((2*S*)-2-((1-(bis(4-(methylthio)phenoxy)phosphoryl)-2-methylpropyl)carbamoyl)pyrrolidin-1-yl)-3-methyl-1-oxobutan-2-yl)carbamate

<sup>31</sup>P NMR (121 MHz, CDCl<sub>3</sub>) δ 18.15 (s, 52%), 18.48 (s, 48%).

<sup>1</sup>H NMR (300 MHz, CDCl<sub>3</sub>) δ 7.03–7.23 (m, 8H), 5.30 (dd, *J* = 61.7, 9.3 Hz, 1H), 4.49–4.78 (m, 2H), 4.20–4.34 (m, 1H), 3.43–3.80 (m, 2H), 2.44 (d, *J* = 2.7 Hz, 6H), 2.04–2.41 (m, 2H), 1.74–2.03 (m, 4H), 1.42 (d, *J* = 2.0 Hz, 9H), 0.81–1.14 (m, 12H).

**HRMS:** C<sub>33</sub>H<sub>48</sub>N<sub>3</sub>O<sub>7</sub>PS<sub>2</sub> [M+H]<sup>+</sup> calc. 694.2750 found 694.2738

**HPLC:** purity >99%; retention time 18.817 and 19.053 min

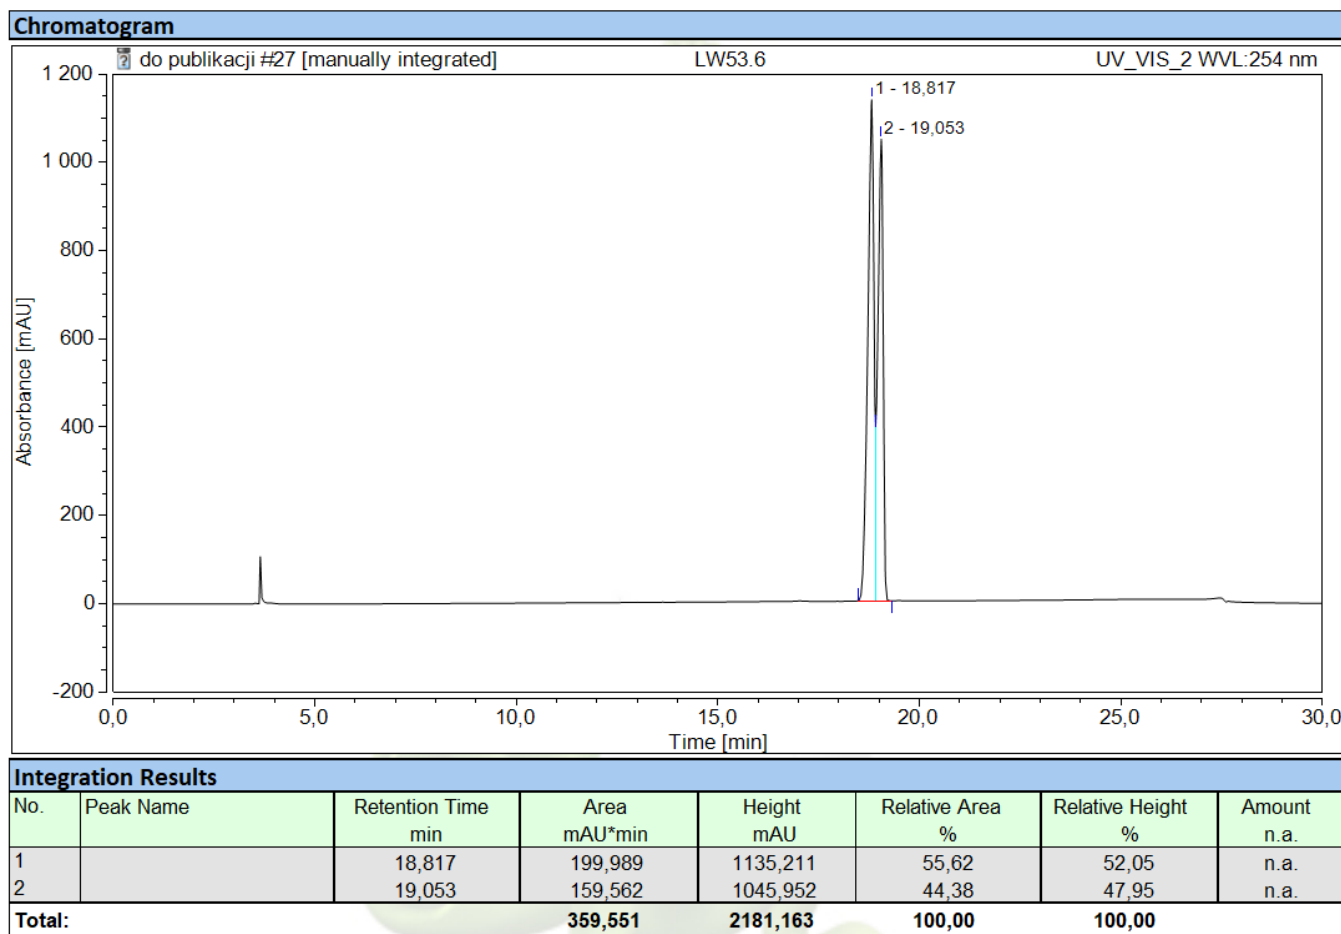

**(28) Boc-L-Val-D-Pro-Val<sup>P</sup>(OPh-4-SCH<sub>3</sub>)<sub>2</sub>**

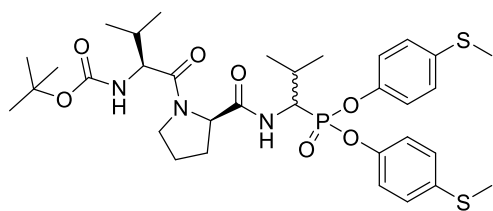

**Name:** *tert*-butyl ((2S)-1-((2R)-2-((1-(bis(4-(methylthio)phenoxy)phosphoryl)-2-methylpropyl)carbamoyl)pyrrolidin-1-yl)-3-methyl-1-oxobutan-2-yl)carbamate

<sup>31</sup>P NMR (162 MHz, Chloroform-d) δ 18.42 (s, 58%), 18.19 (s, 42%).

<sup>1</sup>H NMR (400 MHz, Chloroform-d) δ 7.57 (dd, *J* = 122.0, 9.7 Hz, 1H, NH), 7.22 – 7.00 (m, 8H, 8xArH), 5.23 (t, *J* = 8.0 Hz, 1H, NH), 4.74 – 4.53 (m, 2H, CHP, CH), 4.31 – 4.19 (m, 1H, CH), 3.90 – 3.76 (m, 1H, CH<sub>2</sub>), 3.58 – 3.44 (m, 1H, CH<sub>2</sub>), 2.43 (d, *J* = 4.6 Hz, 6H, 3xSCH<sub>3</sub>), 2.42 – 1.73 (m, 6H, 2xCH<sub>2</sub>, 2xCH), 1.45 – 1.30 (m, 9H, Boc), 1.20 – 0.83 (m, 12H, 4xCH<sub>3</sub>).

**HRMS:** C<sub>33</sub>H<sub>48</sub>N<sub>3</sub>O<sub>7</sub>PS<sub>2</sub> [M+Na]<sup>+</sup> calc. 716.2569 found 716.2552

**HPLC:** purity >99%; retention time 18.967 min

**Chromatogram**

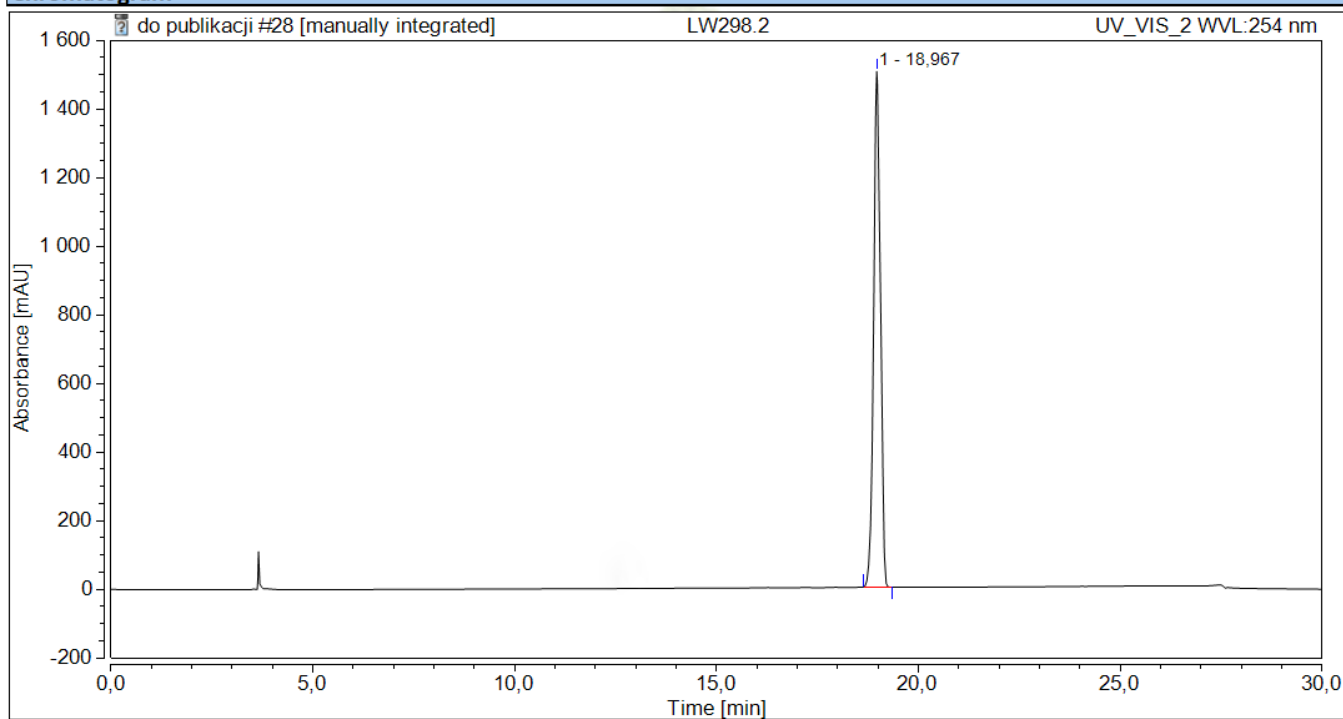

**Integration Results**

| No.           | Peak Name | Retention Time<br>min | Area<br>mAU*min | Height<br>mAU   | Relative Area<br>% | Relative Height<br>% | Amount<br>n.a. |
|---------------|-----------|-----------------------|-----------------|-----------------|--------------------|----------------------|----------------|
| 1             |           | 18,967                | 292,341         | 1502,416        | 100,00             | 100,00               | n.a.           |
| <b>Total:</b> |           |                       | <b>292,341</b>  | <b>1502,416</b> | <b>100,00</b>      | <b>100,00</b>        |                |

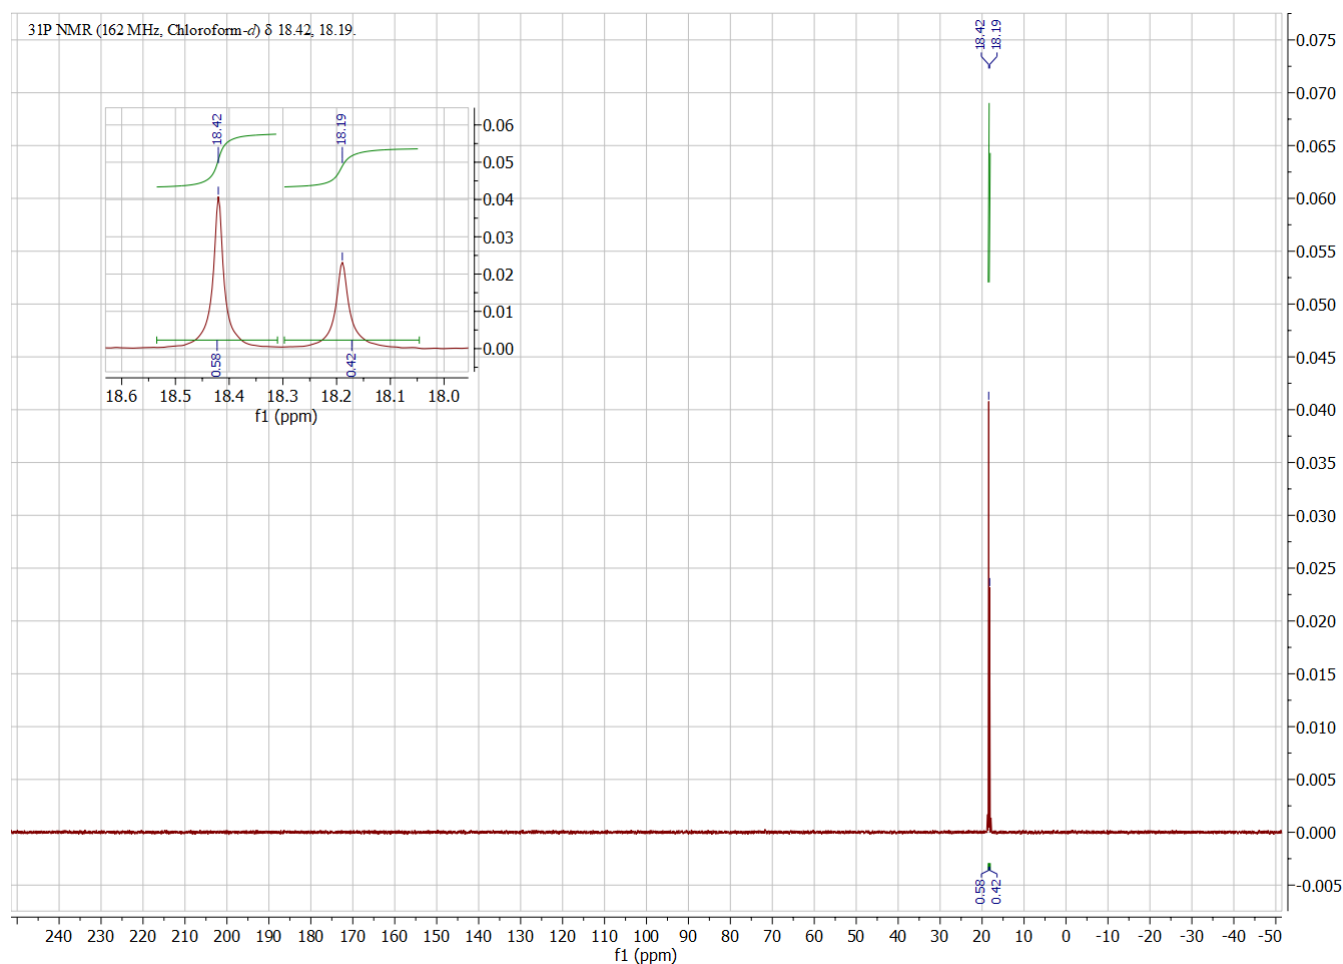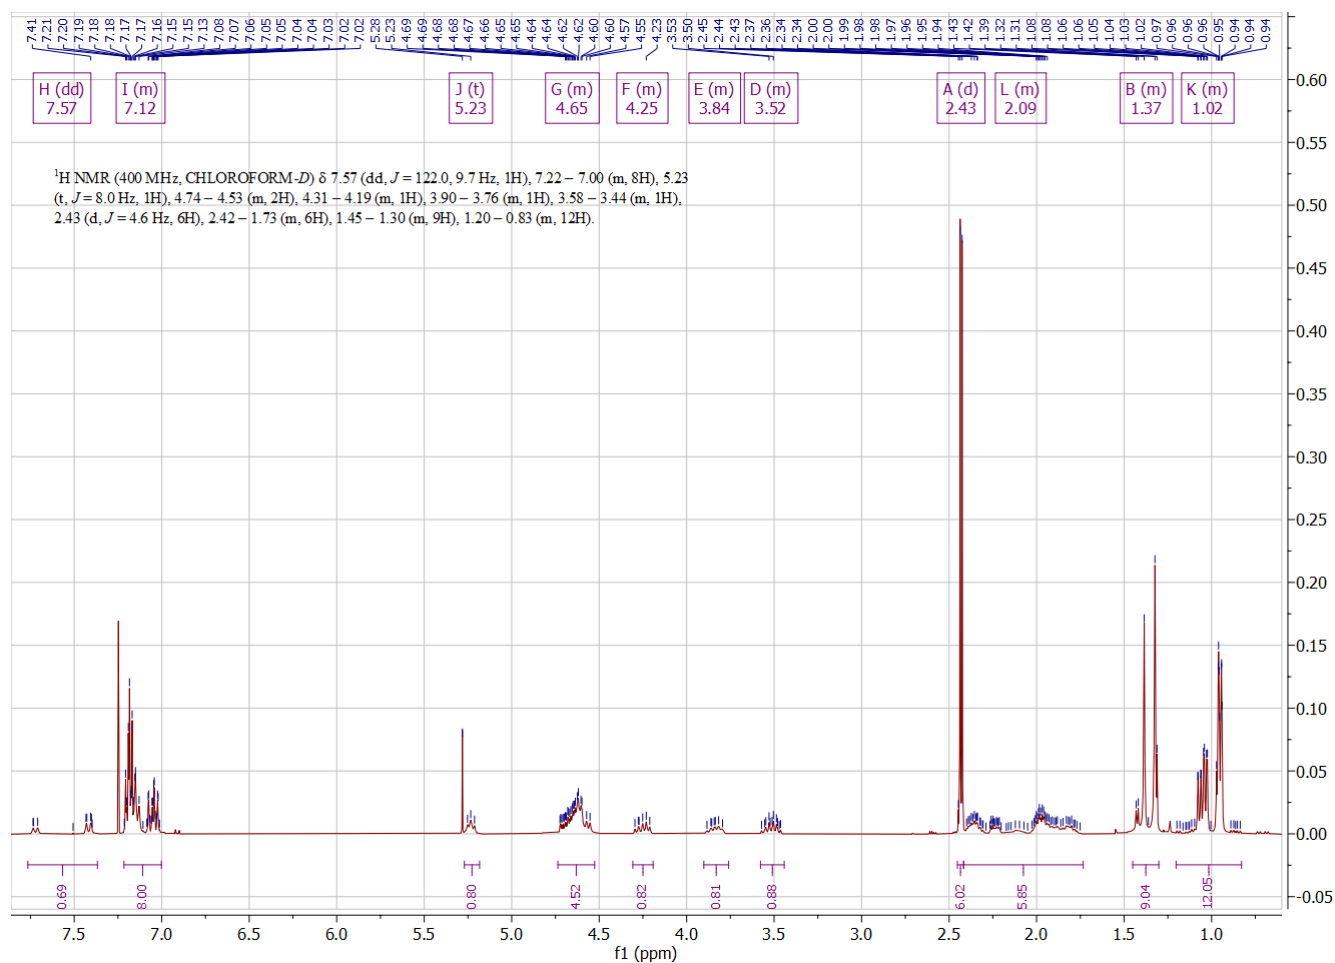

**(29) Boc-L-Val-L-Oic-Val<sup>P</sup>(OPh-4-SCH<sub>3</sub>)<sub>2</sub>**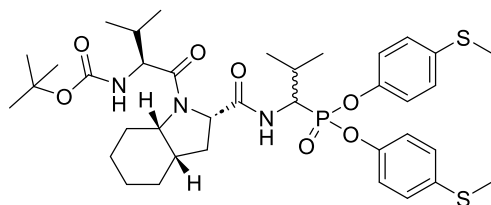

**Name:** *tert*-butyl ((2*S*)-1-((2*S*,3*aS*,7*aS*)-2-((1-(bis(4-(methylthio)phenoxy)phosphoryl)-2-methylpropyl)carbamoyl)octahydro-1*H*-indol-1-yl)-3-methyl-1-oxobutan-2-yl)carbamate

<sup>31</sup>P NMR (162 MHz, Chloroform-*d*) δ 18.96(s, 44%), 18.27 (s, 56%). <sup>1</sup>H NMR

<sup>1</sup>H NMR (400 MHz, Chloroform-*d*) δ 7.41 (dd, *J* = 66.0, 10.1 Hz, 1H, NH), 7.27 – 6.99 (m, 8H, 8*x*ArH), 5.16 (dd, *J* = 37.5, 9.9 Hz, 1H, NH), 4.79 – 4.59 (m, 1H, CHP), 4.51 – 4.10 (m, 2H, 2*x*CH), 2.48 – 2.40 (m, 6H, 2*x*SCH<sub>3</sub>), 2.40 – 2.18 (m, 3H, CH<sub>2</sub>, CH), 2.09 – 1.84 (m, 2H, 2*x*CH), 1.84 – 1.55 (m, 5H, 2*x*CH<sub>2</sub>, CH), 1.55 – 1.44 (m, 2H, CH<sub>2</sub>), 1.42 (d, *J* = 5.6 Hz, 9H, Boc), 1.30 – 1.13 (m, 2H, CH<sub>2</sub>), 1.13 – 0.97 (m, 6H, 2*x*CH<sub>3</sub>), 0.97 – 0.78 (m, 6H, 2*x*CH<sub>3</sub>).

**HRMS:** C<sub>37</sub>H<sub>54</sub>N<sub>3</sub>O<sub>7</sub>PS<sub>2</sub> [M+Na]<sup>+</sup> calc. 770.3038 found 770.3038

**HPLC:** purity >99%; retention time 21.010 and 21.287 min

**Chromatogram**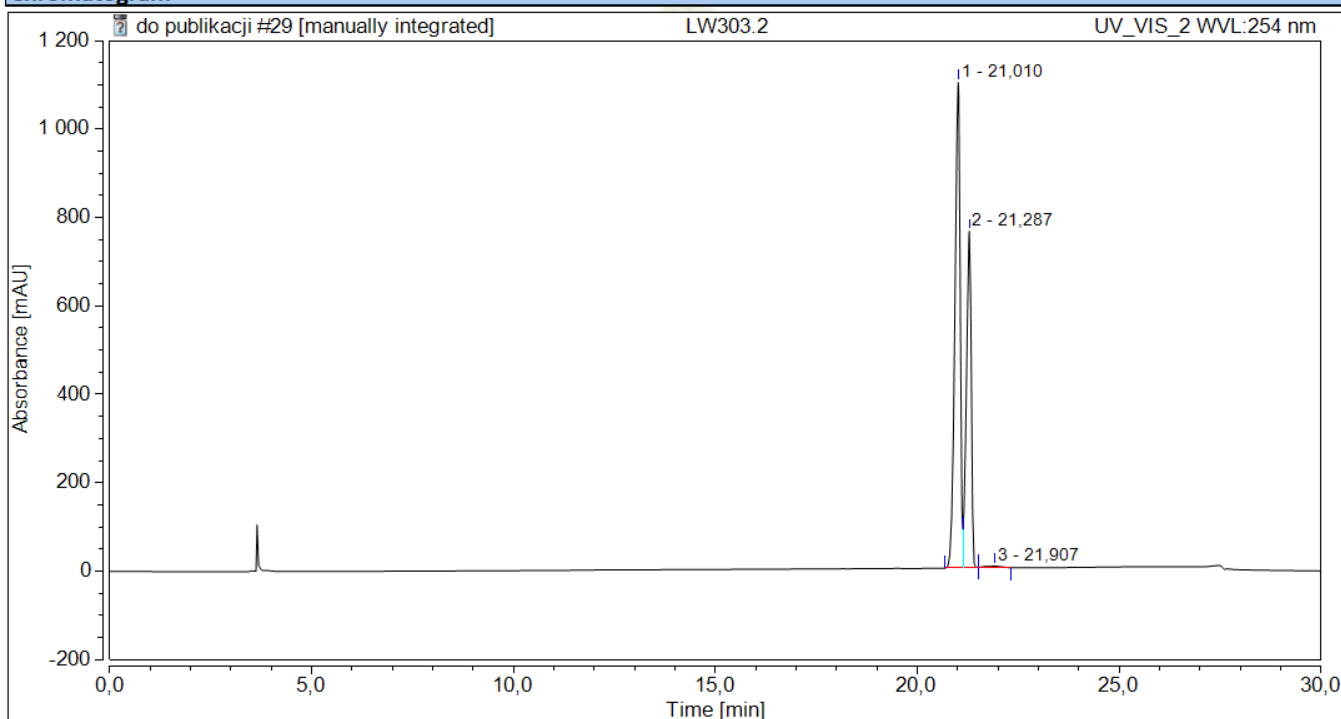**Integration Results**

| No.           | Peak Name | Retention Time<br>min | Area<br>mAU*min | Height<br>mAU   | Relative Area<br>% | Relative Height<br>% | Amount<br>n.a. |
|---------------|-----------|-----------------------|-----------------|-----------------|--------------------|----------------------|----------------|
| 1             |           | 21,010                | 166,256         | 1098,398        | 60,69              | 58,93                | n.a.           |
| 2             |           | 21,287                | 105,767         | 761,811         | 38,61              | 40,87                | n.a.           |
| 3             |           | 21,907                | 1,931           | 3,737           | 0,70               | 0,20                 | n.a.           |
| <b>Total:</b> |           |                       | <b>273,954</b>  | <b>1863,946</b> | <b>100,00</b>      | <b>100,00</b>        |                |

$^{31}\text{P}$  NMR (162 MHz, Chloroform- $d$ )  $\delta$  18.96, 18.27.

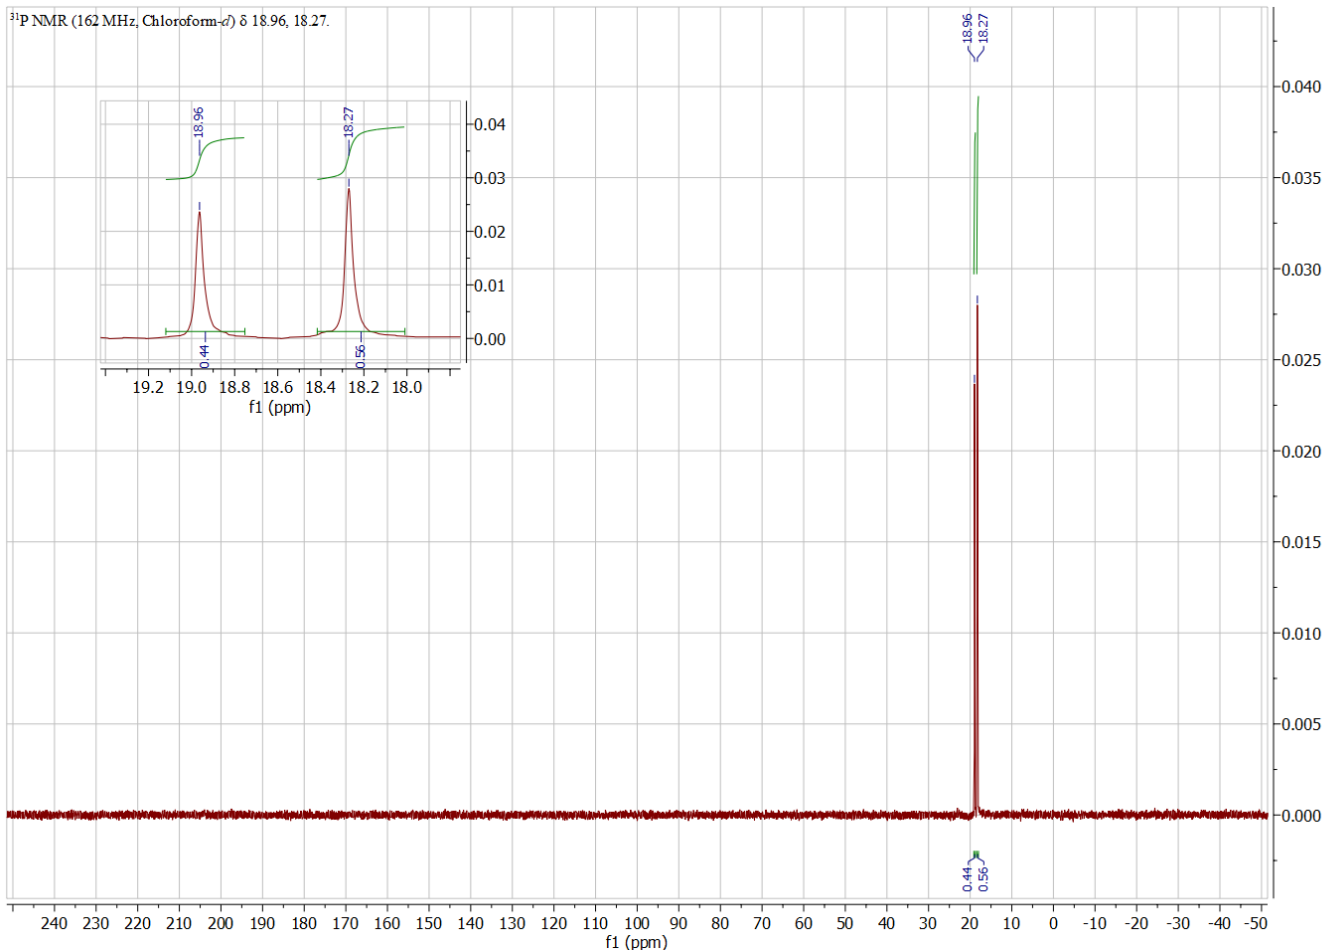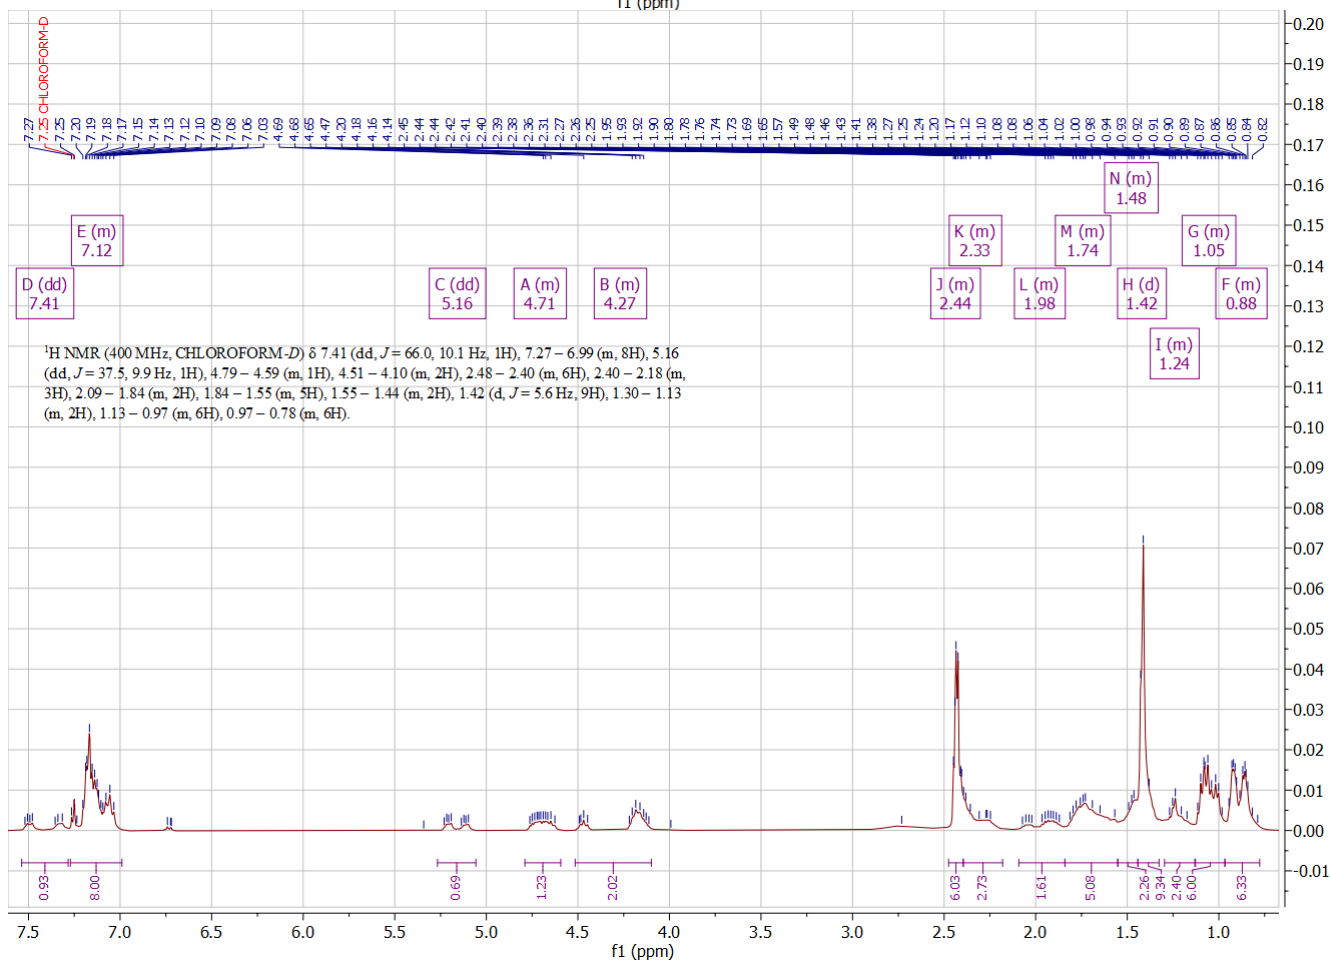

**(30) Boc-L-Val-L-Pip-Val<sup>P</sup>(OPh-4-SCH<sub>3</sub>)<sub>2</sub>**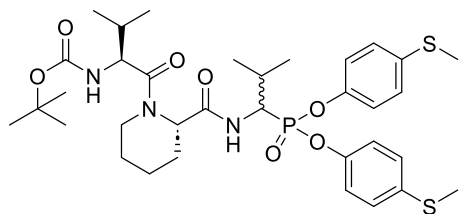

**Name:** *tert*-butyl ((2*S*)-1-((2*S*)-2-((1-(bis(4-(methylthio)phenoxy)phosphoryl)-2-methylpropyl)carbamoyl)piperidin-1-yl)-3-methyl-1-oxobutan-2-yl)carbamate

<sup>31</sup>P NMR (162 MHz, Chloroform-*d*) δ 18.97 (s, 19%), 18.69 (s, 39%), 18.11 (s, 42%).

<sup>1</sup>H NMR (400 MHz, Chloroform-*d*) δ 7.24 – 6.94 (m, 8H, 8xArH), 6.40 – 6.20 (m, 1H, NH), 5.39 – 5.05 (m, 2H, NH, CH), 4.81 – 4.50 (m, 2H, CH<sub>2</sub>), 4.23 – 3.74 (m, 1H, CHP), 3.29 – 2.50 (m, 1H, CH), 2.49 – 2.41 (m, 6H, 2xSCH<sub>3</sub>), 2.41 – 2.10 (m, 2H, 2xCH), 2.03 – 1.81 (m, 2H, CH<sub>2</sub>), 1.68 – 1.44 (m, 4H, 2xCH<sub>2</sub>), 1.44 – 1.28 (m, 9H, Boc), 1.11 – 0.77 (m, 12H, 4xCH<sub>3</sub>).

**HRMS:** C<sub>34</sub>H<sub>50</sub>N<sub>3</sub>O<sub>7</sub>PS<sub>2</sub> [M+Na]<sup>+</sup> calc. 730.2725 found 730.2708

**HPLC:** purity >99%; retention time 19.987 and 20.133 min

**Chromatogram**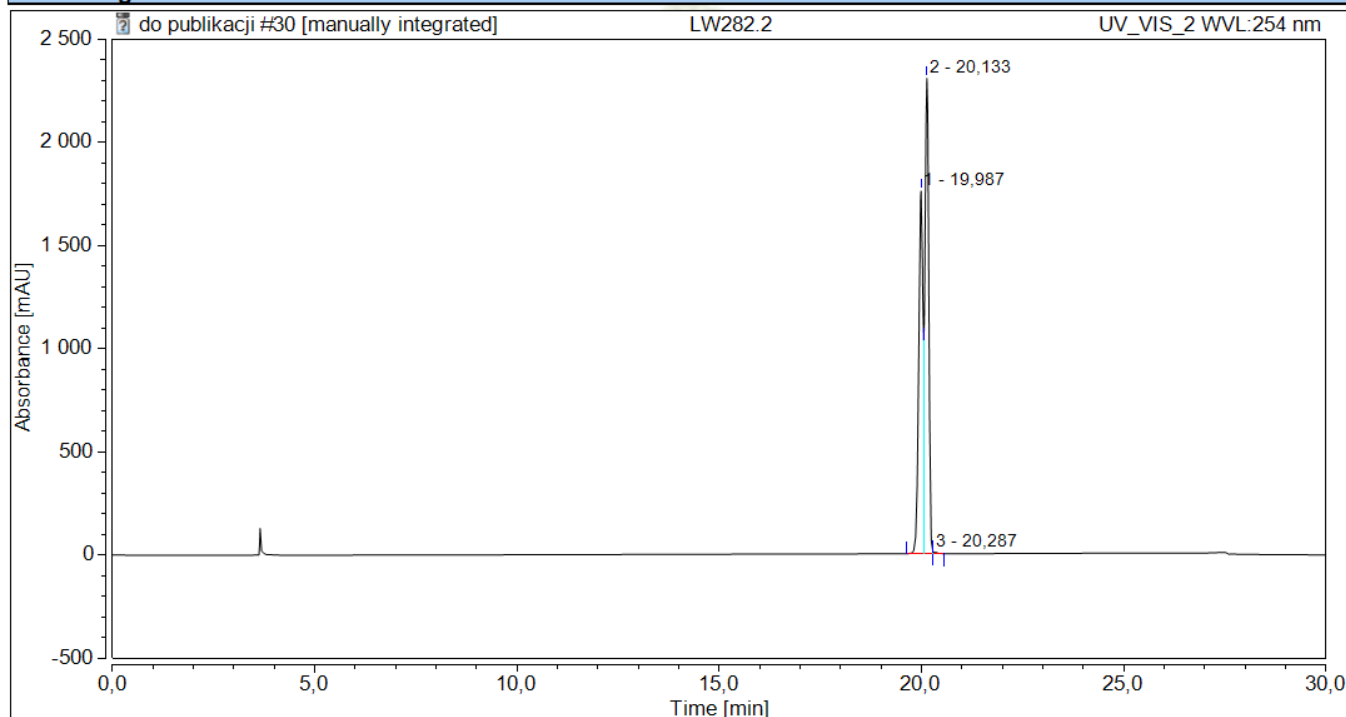**Integration Results**

| No.           | Peak Name | Retention Time<br>min | Area<br>mAU*min | Height<br>mAU   | Relative Area<br>% | Relative Height<br>% | Amount<br>n.a. |
|---------------|-----------|-----------------------|-----------------|-----------------|--------------------|----------------------|----------------|
| 1             |           | 19,987                | 208,225         | 1756,423        | 44,81              | 43,20                | n.a.           |
| 2             |           | 20,133                | 255,759         | 2302,715        | 55,04              | 56,64                | n.a.           |
| 3             |           | 20,287                | 0,720           | 6,307           | 0,15               | 0,16                 | n.a.           |
| <b>Total:</b> |           |                       | <b>464,704</b>  | <b>4065,445</b> | <b>100,00</b>      | <b>100,00</b>        |                |

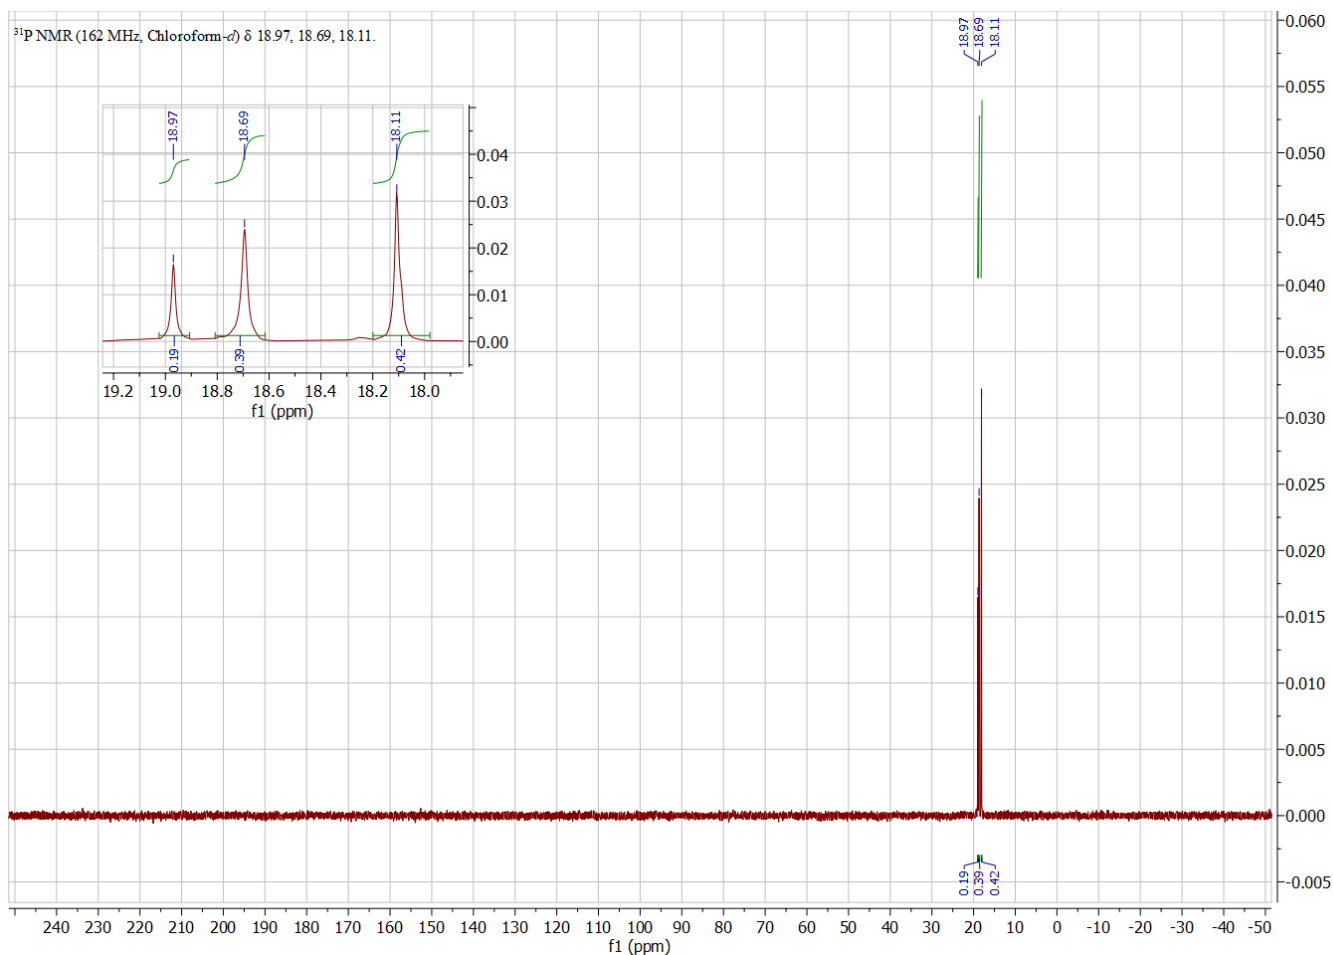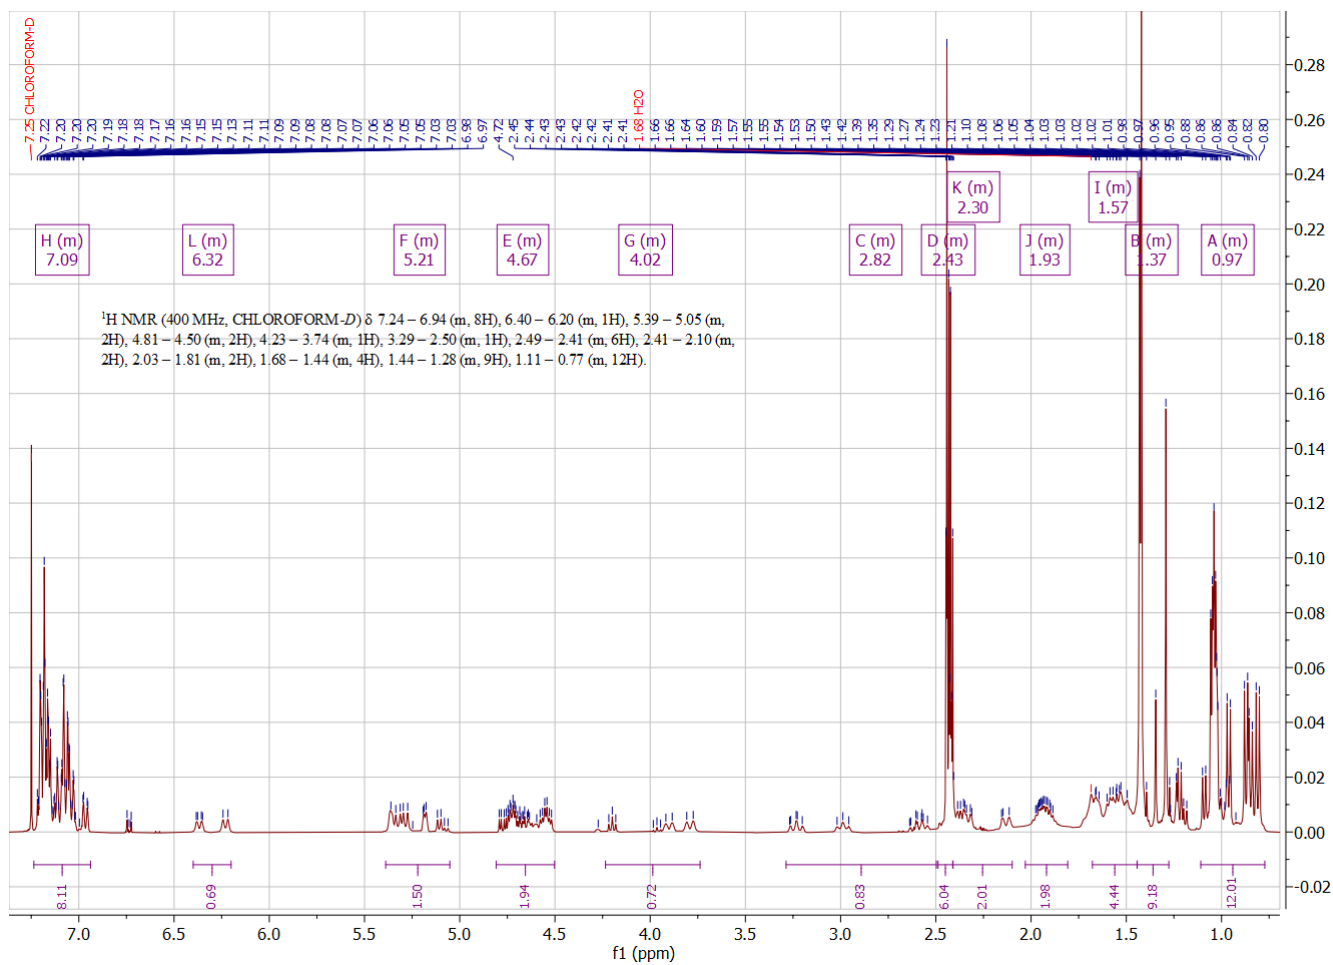

**(31) Boc-L-Val-D-Pip-Val<sup>P</sup>(OPh-4-SCH<sub>3</sub>)<sub>2</sub>**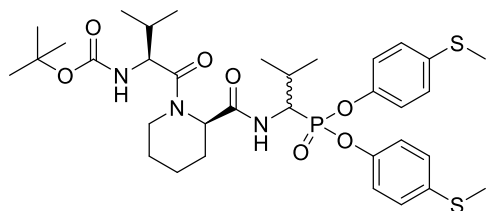

**Name:** *tert*-butyl ((2*S*)-1-((2*R*)-2-((1-(bis(4-(methylthio)phenoxy)phosphoryl)-2-methylpropyl)carbamoyl)piperidin-1-yl)-3-methyl-1-oxobutan-2-yl)carbamate

<sup>31</sup>P NMR (162 MHz, Chloroform-*d*) δ 18.66 (s, 53%), 18.10 (s, 47%).

<sup>1</sup>H NMR (400 MHz, Chloroform-*d*) δ 7.24 – 7.00 (m, 8H, 8xArH), 6.91 (td, *J* = 9.6, 9.6 Hz, 1H, NH), 5.36 – 5.10 (m, 2H, NH, CH), 4.76 – 4.62 (m, 1H, CHP), 4.53 – 4.38 (m, 1H, CH), 4.01 – 3.80 (m, 1H, CH<sub>2</sub>), 3.18 – 3.04 (m, 1H, CH<sub>2</sub>), 2.49 – 2.42 (m, 6H, 2xSCH<sub>3</sub>), 2.42 – 2.17 (m, 2H, 2xCH), 2.02 – 1.66 (m, 2H, CH<sub>2</sub>), 1.66 – 1.41 (m, 4H, 2xCH<sub>2</sub>), 1.34 (d, *J* = 9.6 Hz, 9H, Boc), 1.14 – 0.82 (m, 12H, 4xCH<sub>3</sub>).

**HRMS:** C<sub>34</sub>H<sub>50</sub>N<sub>3</sub>O<sub>7</sub>PS<sub>2</sub> [M+Na]<sup>+</sup> calc. 730.2725 found 730.2713

**HPLC:** purity >99%; retention time 20.190 and 20.340 min

**Chromatogram**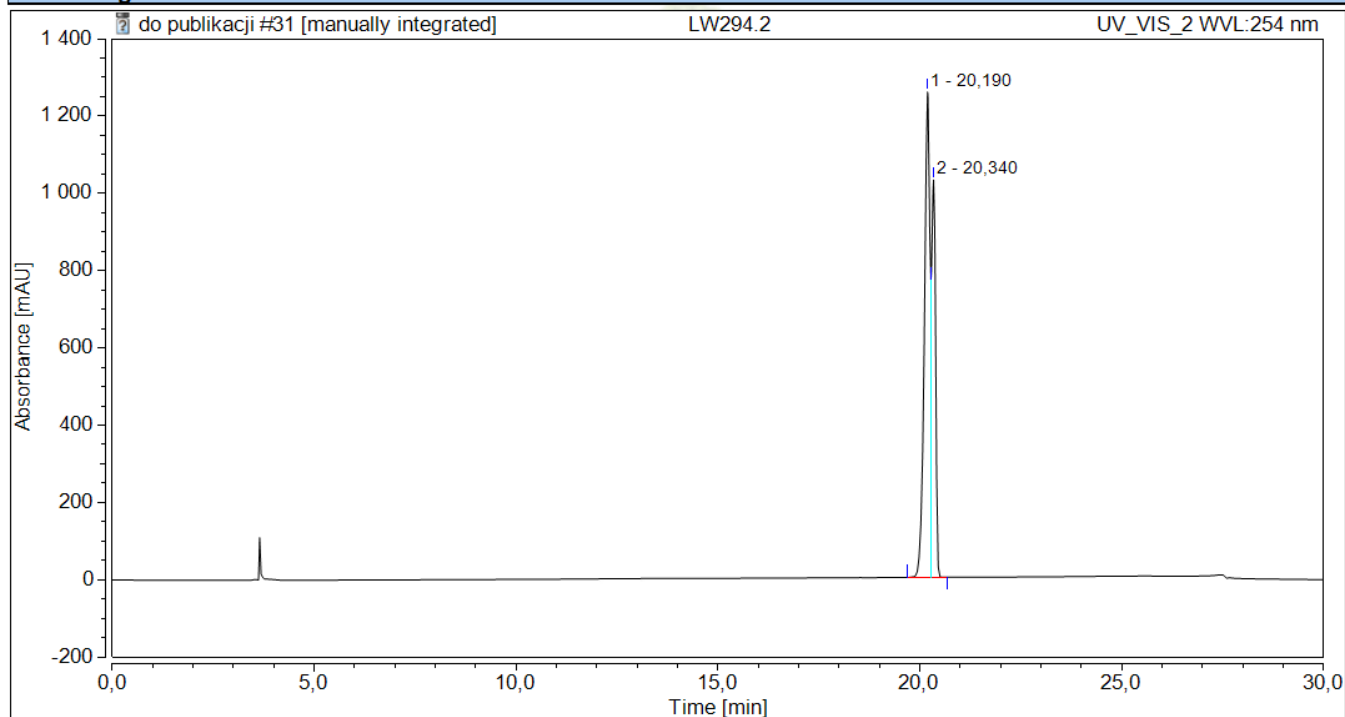**Integration Results**

| No.           | Peak Name | Retention Time<br>min | Area<br>mAU*min | Height<br>mAU   | Relative Area<br>% | Relative Height<br>% | Amount<br>n.a. |
|---------------|-----------|-----------------------|-----------------|-----------------|--------------------|----------------------|----------------|
| 1             |           | 20,190                | 199,441         | 1256,077        | 62,39              | 54,98                | n.a.           |
| 2             |           | 20,340                | 120,237         | 1028,374        | 37,61              | 45,02                | n.a.           |
| <b>Total:</b> |           |                       | <b>319,679</b>  | <b>2284,451</b> | <b>100,00</b>      | <b>100,00</b>        |                |



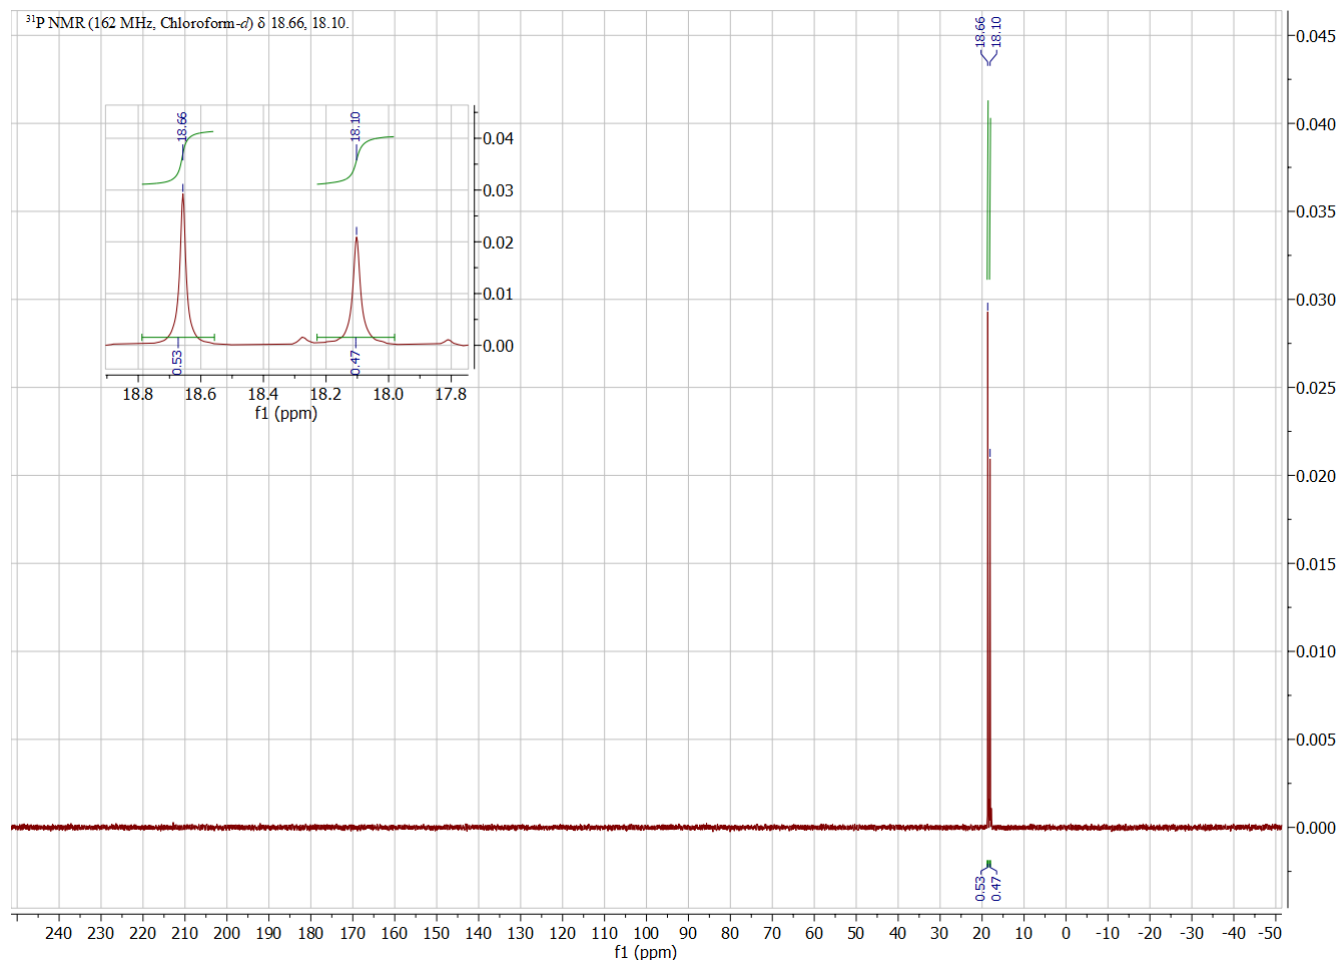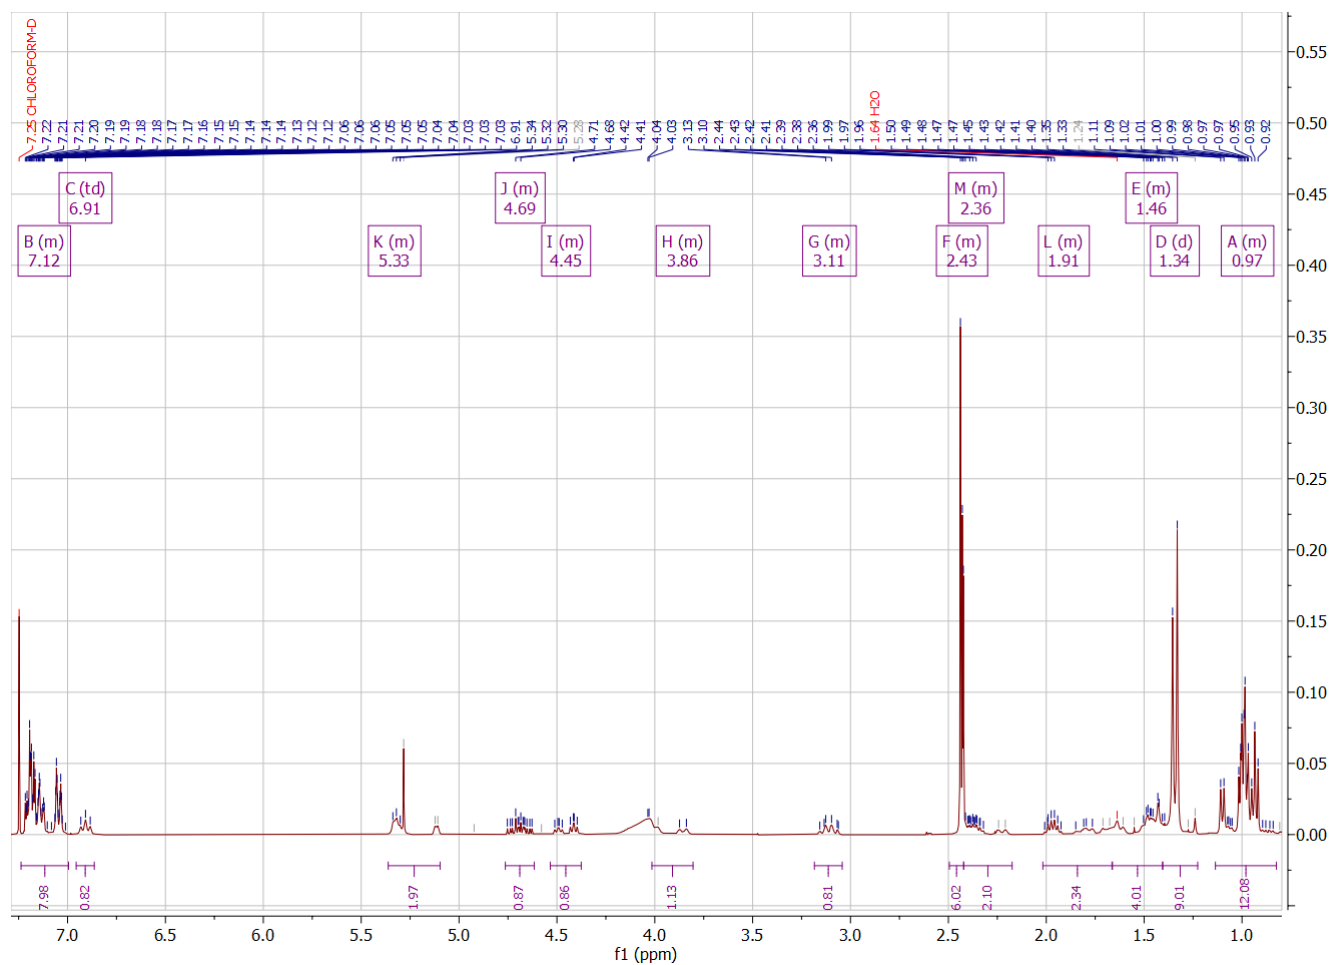

**(32) Boc-L-Val-L-Tic-Val<sup>P</sup>(OPh-4-SCH<sub>3</sub>)<sub>2</sub>**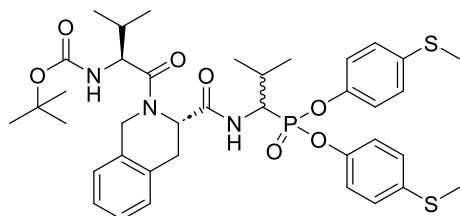

**Name:** *tert*-butyl ((2*S*)-1-((3*S*)-3-((1-(bis(4-(methylthio)phenoxy)phosphoryl)-2-methylpropyl)carbamoyl)-3,4-dihydroisoquinolin-2(1*H*)-yl)-3-methyl-1-oxobutan-2-yl)carbamate

<sup>31</sup>P NMR (162 MHz, Chloroform-*d*) δ 19.08 (s, 21%), 18.64 (s, 25%), 18.21 (s, 47%), 17.96 (s, 7%).

<sup>1</sup>H NMR (400 MHz, Chloroform-*d*) δ 7.28 – 6.80 (m, 12H, 12xArH), 6.77 – 6.41 (m, 1H, NH), 5.47 – 5.14 (m, 1H, NH), 4.99 – 4.87 (m, 1H, CH), 4.74 – 4.11 (m, 3H, CH<sub>2</sub>, CHP), 3.71 – 2.56 (m, 3H, CH<sub>2</sub>, CH), 2.49 – 2.37 (m, 6H, 2xSCH<sub>3</sub>), 2.36 – 2.17 (m, 1H, CH), 2.12 – 1.88 (m, 1H, CH), 1.44 – 1.30 (m, 9H, Boc), 1.15 – 0.81 (m, 12H, 4xCH<sub>3</sub>).

**HRMS:** C<sub>38</sub>H<sub>50</sub>N<sub>3</sub>O<sub>7</sub>PS<sub>2</sub> [M+Na]<sup>+</sup> calc. 778.2725 found 778.2715

**HPLC:** purity >99%; retention time 20.107 and 20.297 min

**Chromatogram**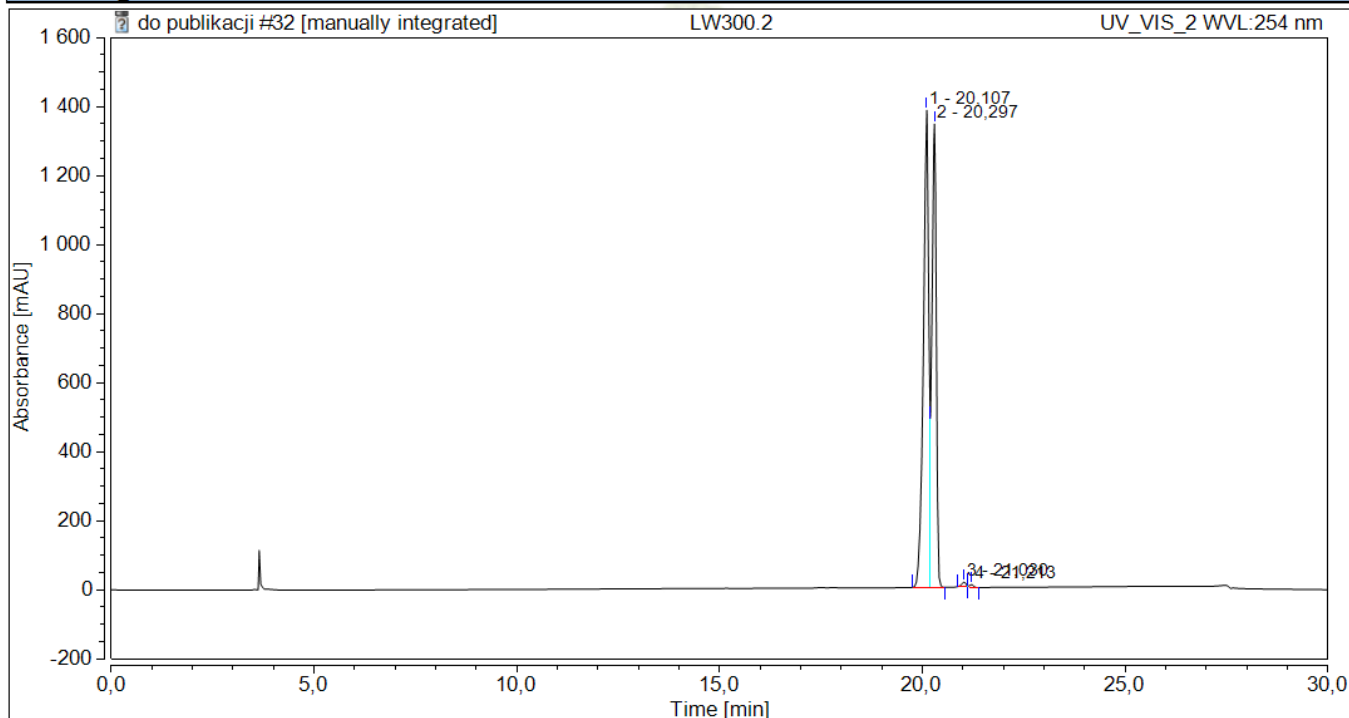**Integration Results**

| No.           | Peak Name | Retention Time<br>min | Area<br>mAU*min | Height<br>mAU   | Relative Area<br>% | Relative Height<br>% | Amount |
|---------------|-----------|-----------------------|-----------------|-----------------|--------------------|----------------------|--------|
| 1             |           | 20,107                | 208,628         | 1381,674        | 54,93              | 50,32                | n.a.   |
| 2             |           | 20,297                | 168,529         | 1341,930        | 44,37              | 48,87                | n.a.   |
| 3             |           | 21,030                | 1,793           | 14,491          | 0,47               | 0,53                 | n.a.   |
| 4             |           | 21,213                | 0,843           | 7,849           | 0,22               | 0,29                 | n.a.   |
| <b>Total:</b> |           |                       | <b>379,794</b>  | <b>2745,945</b> | <b>100,00</b>      | <b>100,00</b>        |        |

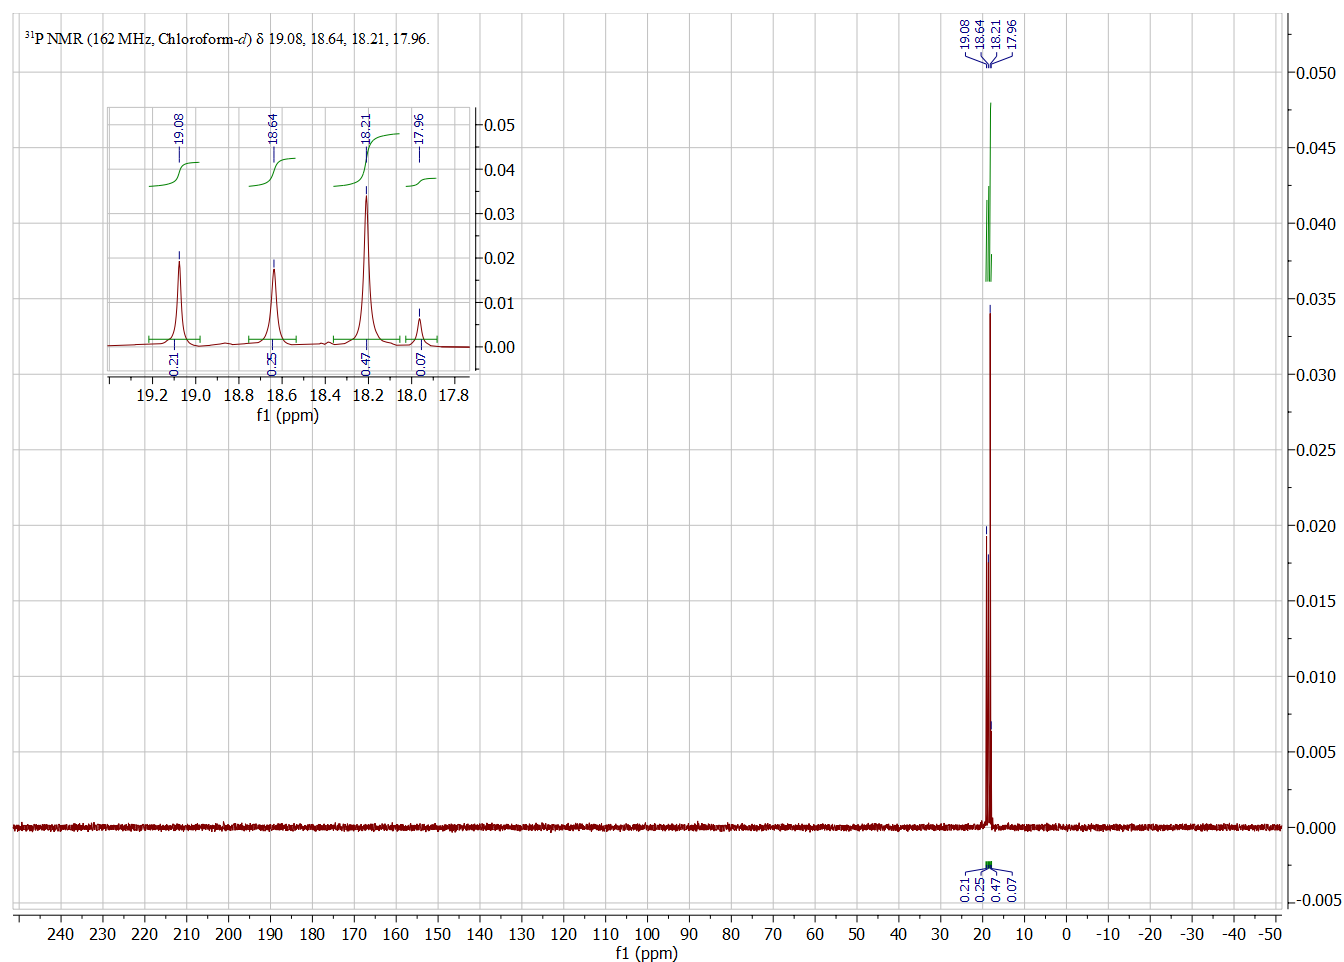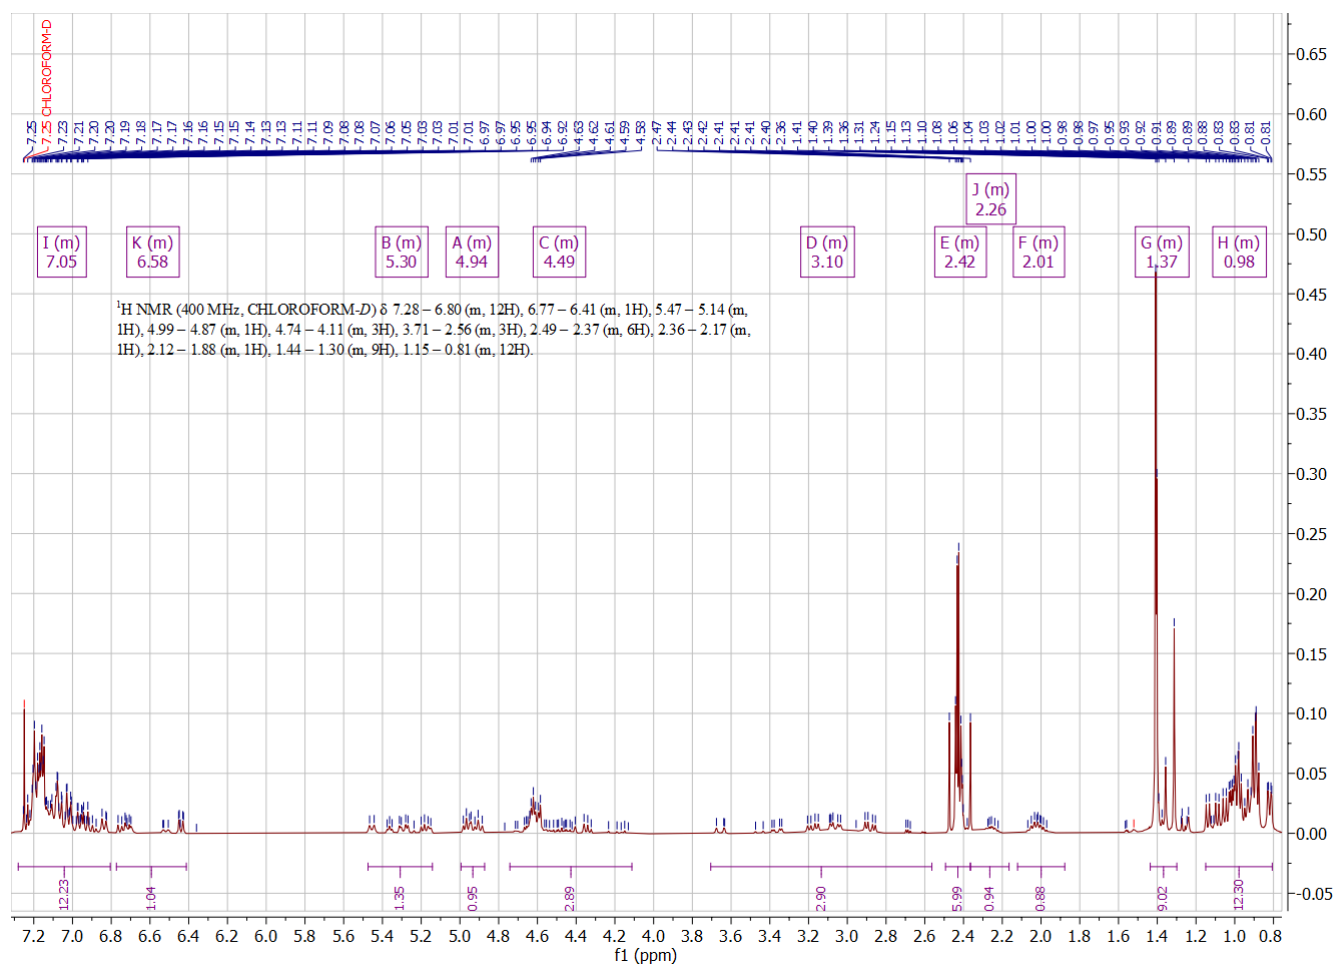

**(33) Boc-L-Val-D-Tic- Val<sup>P</sup>(OPh-4-SCH<sub>3</sub>)<sub>2</sub>**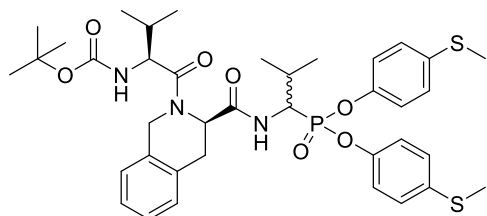

**Name:** *tert*-butyl ((2*S*)-1-((3*R*)-3-((1-(bis(4-(methylthio)phenoxy)phosphoryl)-2-methylpropyl)carbamoyl)-3,4-dihydroisoquinolin-2(1*H*)-yl)-3-methyl-1-oxobutan-2-yl)carbamate

<sup>31</sup>P NMR (162 MHz, Chloroform-*d*) δ 18.79 (s, 46%), 18.32 (s, 54%).

<sup>1</sup>H NMR (400 MHz, Chloroform-*d*) δ 7.24 – 6.84 (m, 12H, 12xArH), 6.67 (dd, *J* = 35.6, 9.3 Hz, 1H, NH), 5.60 – 4.95 (m, 2H, NH, CH), 4.94 – 4.65 (m, 2H, CH<sub>2</sub>), 4.61 – 4.40 (m, 2H, CH<sub>2</sub>), 3.52 – 3.36 (m, 1H, CHP), 3.05 – 2.89 (m, 1H, CH), 2.45 – 2.39 (m, 6H, 2xSCH<sub>3</sub>), 2.33 – 2.17 (m, 1H, CH), 2.05 – 1.95 (m, 1H, CH), 1.43 – 1.32 (m, 9H, Boc), 1.05 – 0.60 (m, 12H, 4xCH<sub>3</sub>).

**HRMS:** C<sub>38</sub>H<sub>50</sub>N<sub>3</sub>O<sub>7</sub>PS<sub>2</sub> [M+Na]<sup>+</sup> calc. 778.2725 found 778.2731

**HPLC:** purity >98%; retention time 20.377 and 20.170 min

**Chromatogram**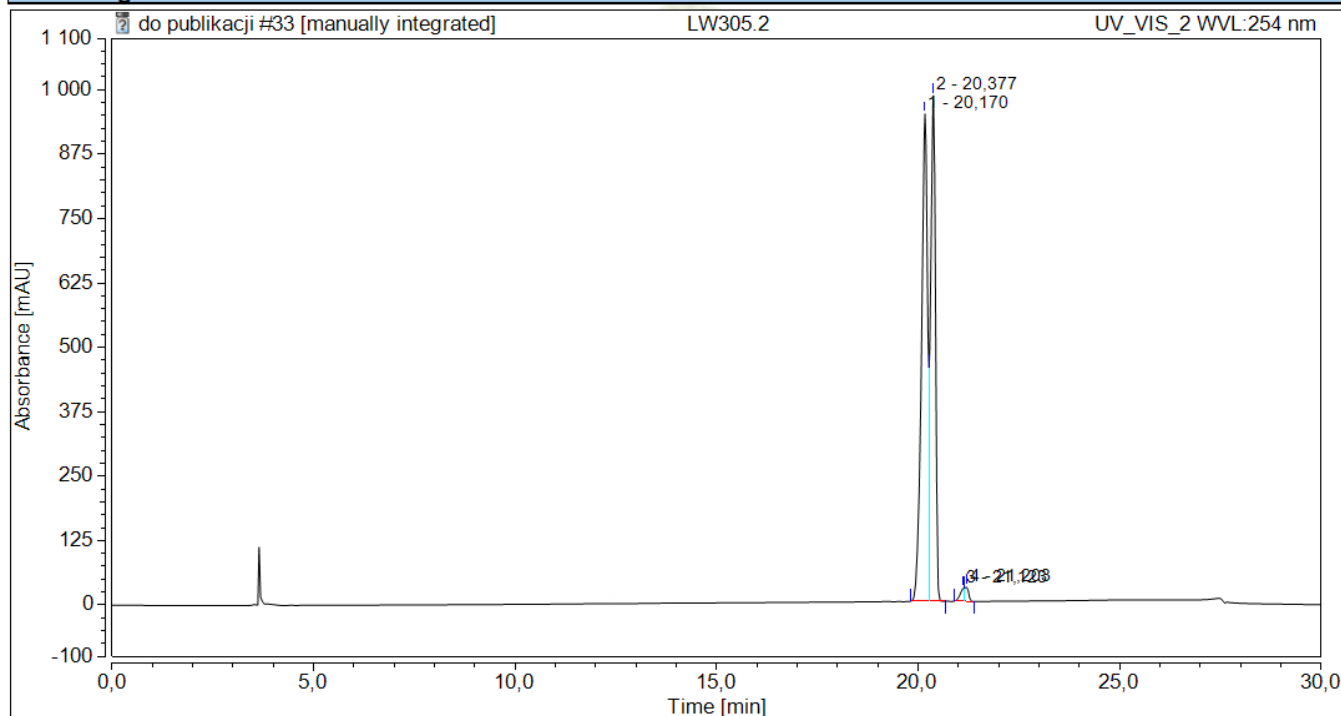**Integration Results**

| No.           | Peak Name | Retention Time min | Area mAU*min   | Height mAU      | Relative Area % | Relative Height % | Amount n.a. |
|---------------|-----------|--------------------|----------------|-----------------|-----------------|-------------------|-------------|
| 1             |           | 20,170             | 165,523        | 945,909         | 53,52           | 47,76             | n.a.        |
| 2             |           | 20,377             | 137,718        | 981,307         | 44,53           | 49,55             | n.a.        |
| 3             |           | 21,123             | 3,150          | 25,049          | 1,02            | 1,26              | n.a.        |
| 4             |           | 21,203             | 2,907          | 28,320          | 0,94            | 1,43              | n.a.        |
| <b>Total:</b> |           |                    | <b>309,298</b> | <b>1980,585</b> | <b>100,00</b>   | <b>100,00</b>     |             |

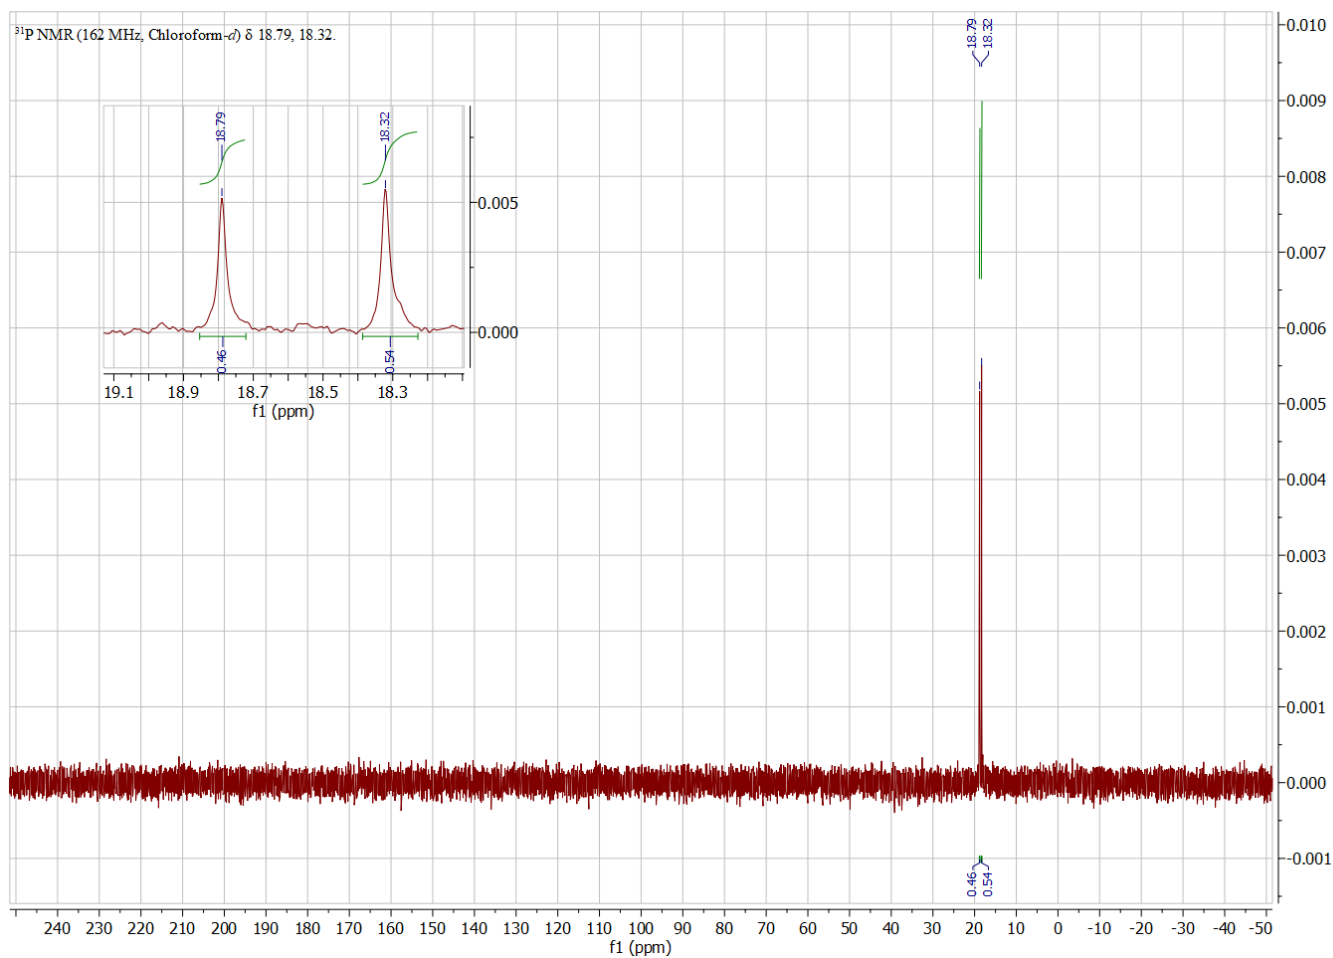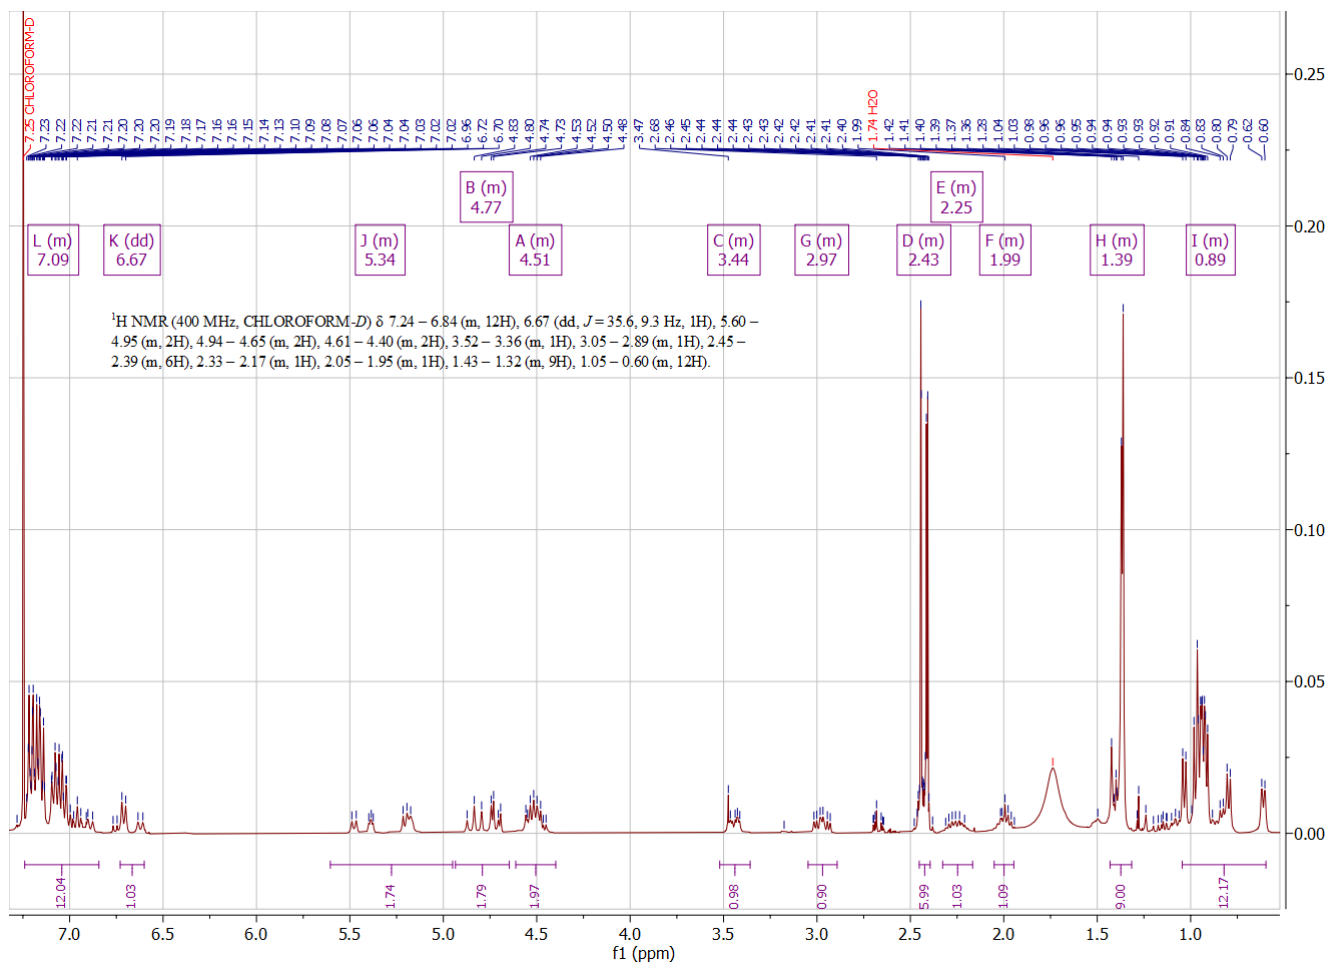

**(34) Boc-L-Val-L-Nip-Val<sup>P</sup>(OPh-4-SCH<sub>3</sub>)<sub>2</sub>**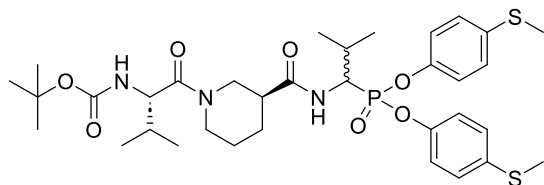

**Name:** *tert*-butyl ((2*S*)-1-((3*S*)-3-((1-(bis(4-(methylthio)phenoxy)phosphoryl)-2-methylpropyl)carbamoyl)piperidin-1-yl)-3-methyl-1-oxobutan-2-yl)carbamate

<sup>31</sup>P NMR (243 MHz, CDCl<sub>3</sub>) δ 18.42 (s, 32%), 17.78 (s, 30%), 17.57 (s, 13%), 17.44 (s, 25%).

<sup>1</sup>H NMR (601 MHz, CDCl<sub>3</sub>) δ 7.22 – 7.00 (m, 8H, 8xArH), 6.84 (dd, *J* = 130.5, 10.2 Hz, 1H, NH), 5.52 – 5.27 (m, 1H, NH), 4.82 – 4.72 (m, 1H, CHP), 4.61 – 3.76 (m, 3H, CH<sub>2</sub>, CH), 3.64 – 3.35 (m, 1H, CH<sub>2</sub>), 3.22 – 2.93 (m, 1H, CH<sub>2</sub>), 2.48 – 2.41 (m, 6H, 2xSCH<sub>3</sub>), 2.41 – 2.27 (m, 2H, 2xCH), 2.04 – 1.82 (m, 2H, CH<sub>2</sub>), 1.82 – 1.61 (m, 2H, CH<sub>2</sub>), 1.53 – 1.44 (m, 1H, CH), 1.44 – 1.32 (m, 9H, Boc), 1.18 – 1.00 (m, 6H, 2xCH<sub>3</sub>), 0.94 – 0.73 (m, 6H, 2xCH<sub>3</sub>).

**HRMS:** C<sub>34</sub>H<sub>50</sub>N<sub>3</sub>O<sub>7</sub>PS<sub>2</sub> [M+Na]<sup>+</sup> calc. 730.2725 found 730.2718

**HPLC:** purity >99%; retention time 19.043 min

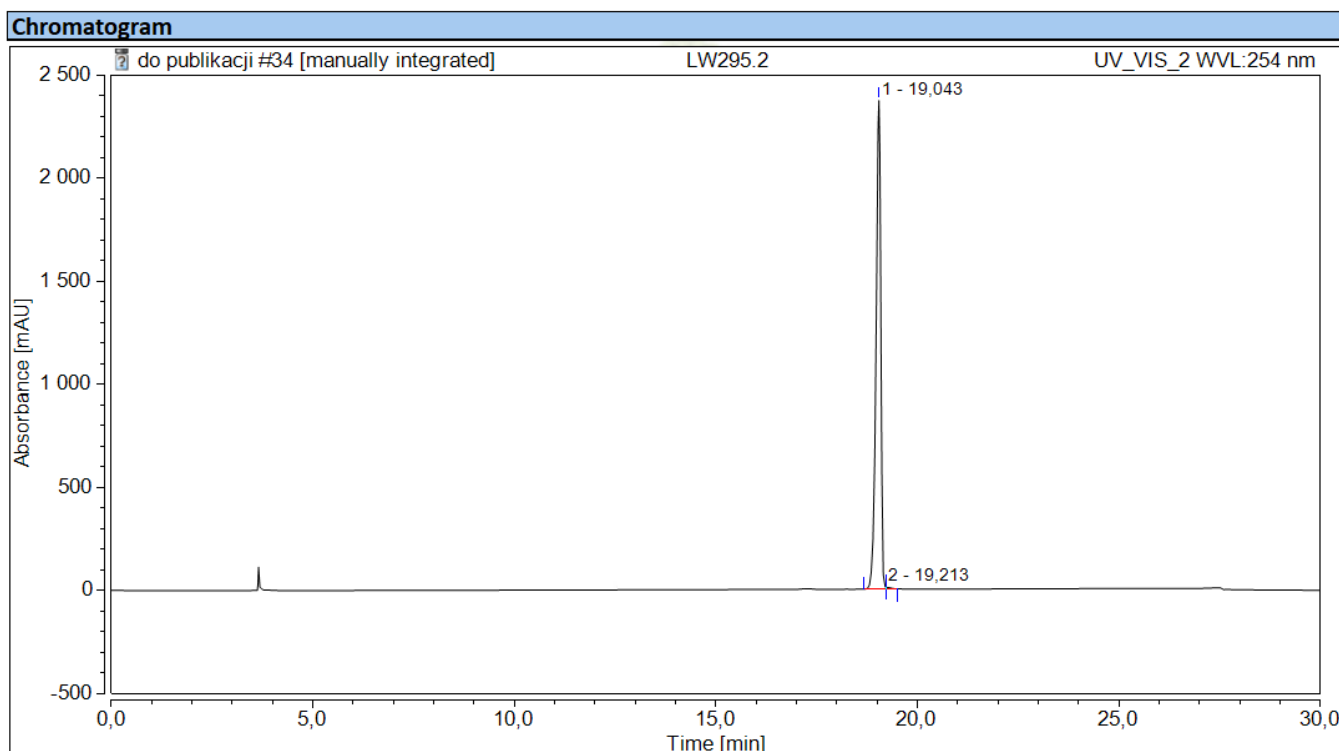

| Integration Results |           |                       |                 |                 |                    |                      |                |
|---------------------|-----------|-----------------------|-----------------|-----------------|--------------------|----------------------|----------------|
| No.                 | Peak Name | Retention Time<br>min | Area<br>mAU*min | Height<br>mAU   | Relative Area<br>% | Relative Height<br>% | Amount<br>n.a. |
| 1                   |           | 19,043                | 322,319         | 2369,236        | 99,63              | 99,61                | n.a.           |
| 2                   |           | 19,213                | 1,206           | 9,201           | 0,37               | 0,39                 | n.a.           |
| <b>Total:</b>       |           |                       | <b>323,524</b>  | <b>2378,436</b> | <b>100,00</b>      | <b>100,00</b>        |                |

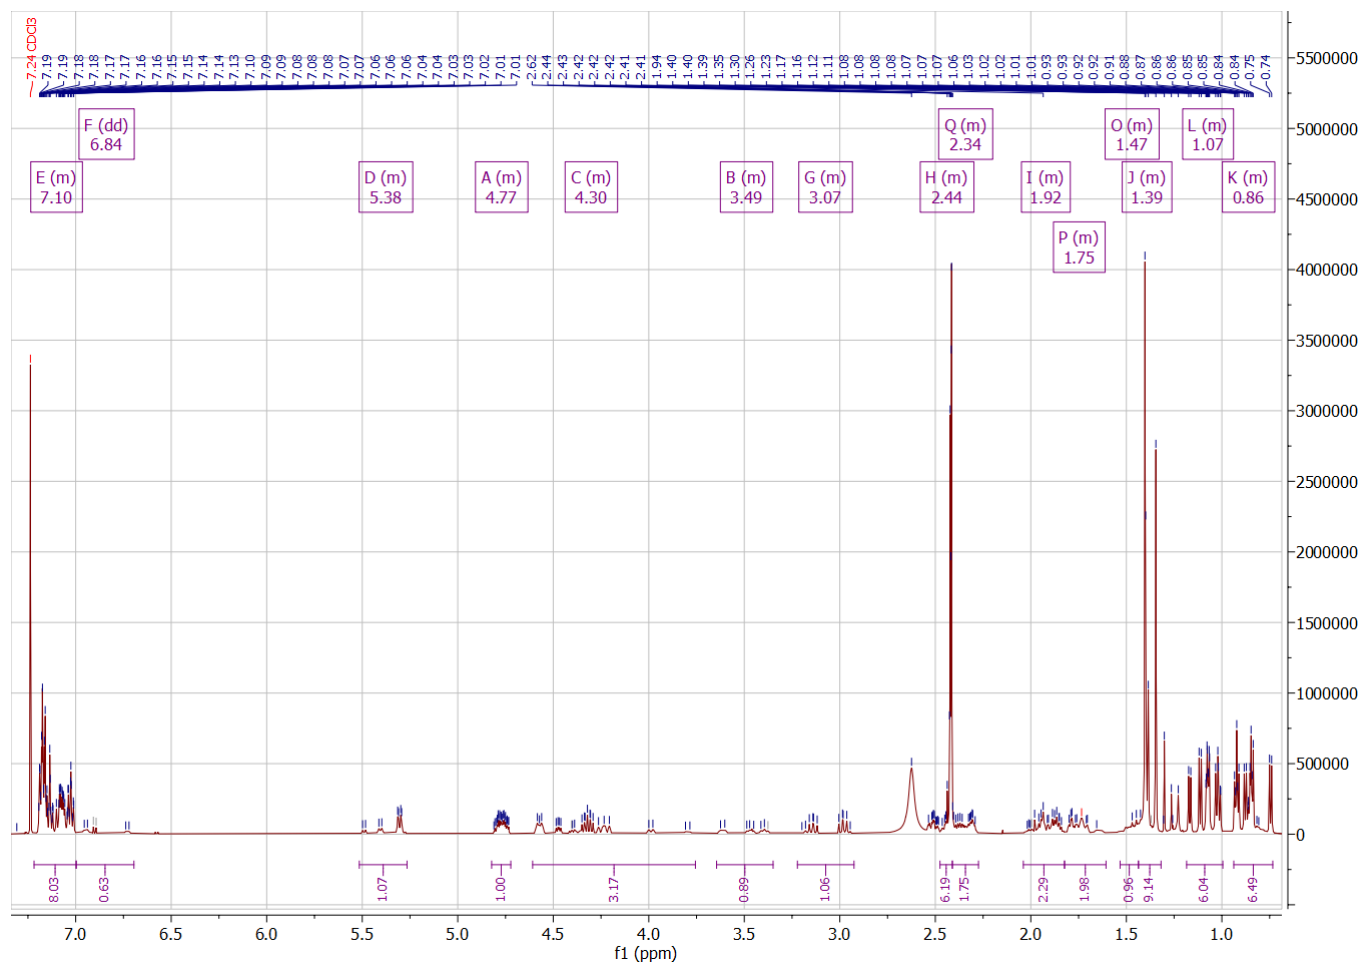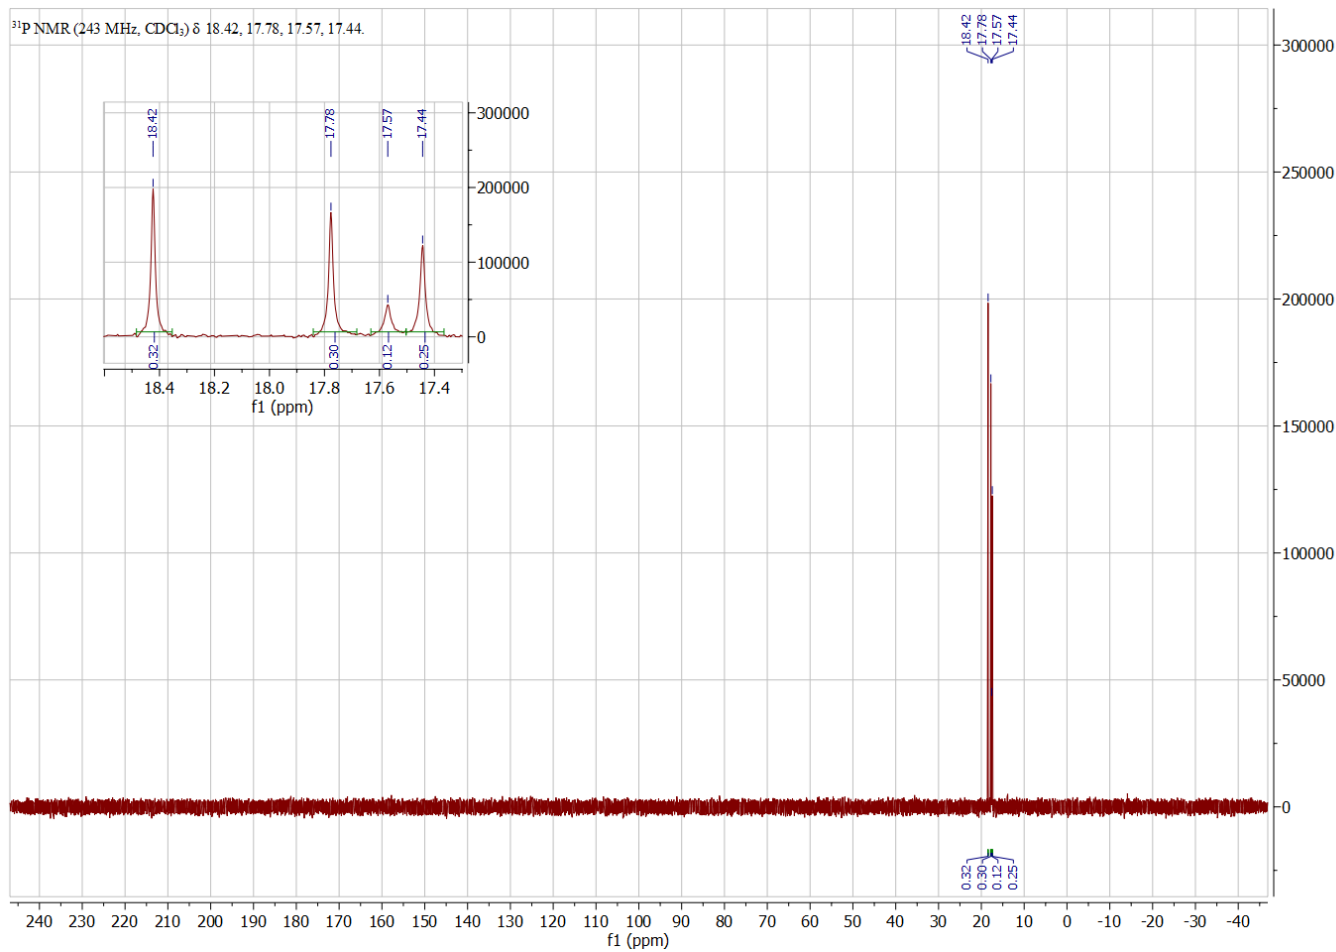

**(35) Boc-L-Val-L-Cpg-Val<sup>P</sup>(OPh-4-SCH<sub>3</sub>)<sub>2</sub>**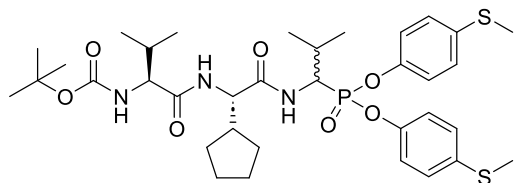

**Name:** *tert*-butyl ((2*S*)-1-(((1*S*)-2-((1-(bis(4-(methylthio)phenoxy)phosphoryl)-2-methylpropyl)amino)-1-cyclopentyl-2-oxoethyl)amino)-3-methyl-1-oxobutan-2-yl)carbamate

<sup>31</sup>P NMR (162 MHz, Chloroform-*d*) δ 18.43 (s, 45%), 18.40 (s, 55%).

<sup>1</sup>H NMR (400 MHz, Chloroform-*d*) δ 7.21 – 7.12 (m, 4H, 4xArH), 7.12 – 6.90 (m, 5H, 4xArH, NH), 6.63 (dd, *J* = 26.2, 8.1 Hz, 1H, NH), 5.11 (dd, *J* = 75.1, 8.5 Hz, 1H, NH), 4.78 – 4.66 (m, 1H, CHP), 4.42 – 4.32 (m, 1H, CH), 3.90 – 3.81 (m, 1H, CH), 2.47 – 2.41 (m, 6H, 2xSCH<sub>3</sub>), 2.41 – 2.22 (m, 2H, 2xCH), 2.16 – 2.02 (m, 1H, CH), 1.81 – 1.65 (m, 2H, CH<sub>2</sub>), 1.65 – 1.45 (m, 4H, 2xCH<sub>2</sub>), 1.44 – 1.36 (m, 9H, Boc), 1.31 – 1.21 (m, 2H, CH<sub>2</sub>), 1.12 – 0.97 (m, 6H, 2xCH<sub>3</sub>), 0.94 – 0.80 (m, 6H, 2xCH<sub>3</sub>).

**HRMS:** C<sub>35</sub>H<sub>52</sub>N<sub>3</sub>O<sub>7</sub>PS<sub>2</sub> [M+Na]<sup>+</sup> calc. 744.2882 found 744.2879

**HPLC:** purity >99%; retention time 19.417 and 19.667 min

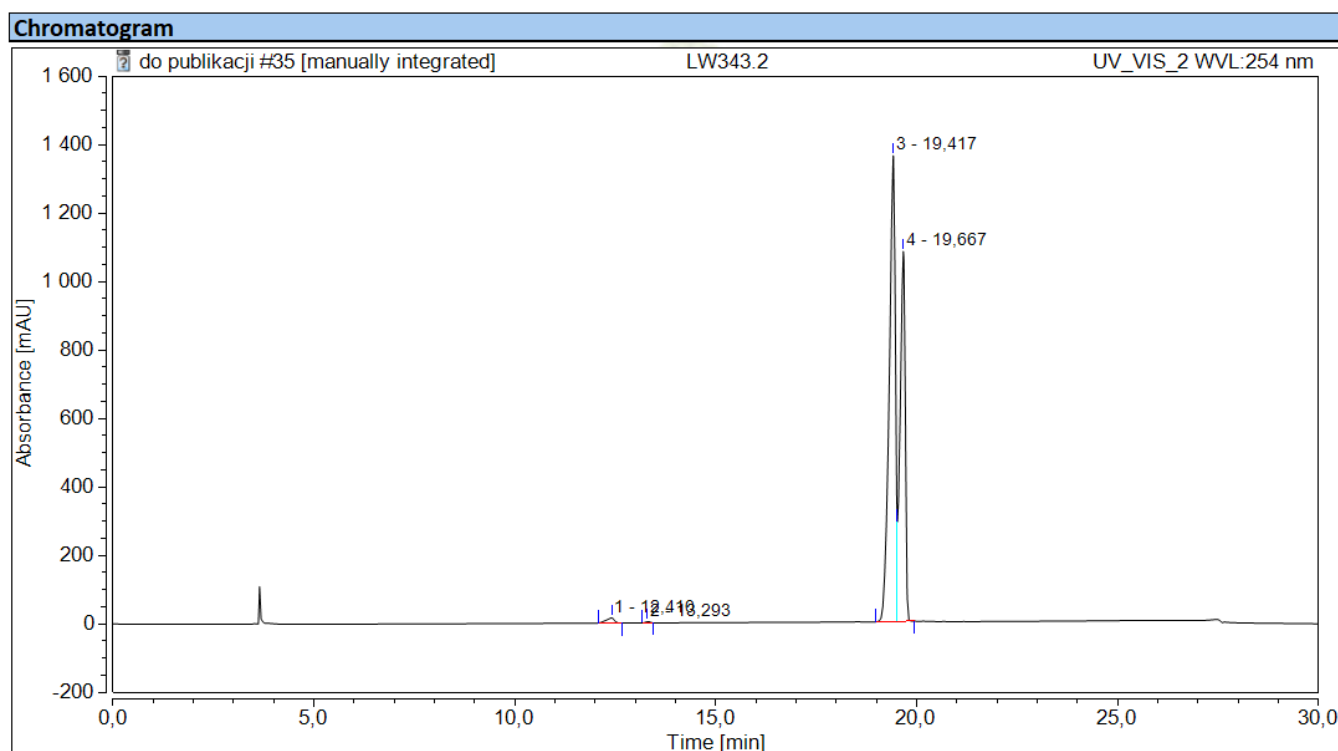

| Integration Results |           |                       |                 |                 |                    |                      |        |
|---------------------|-----------|-----------------------|-----------------|-----------------|--------------------|----------------------|--------|
| No.                 | Peak Name | Retention Time<br>min | Area<br>mAU*min | Height<br>mAU   | Relative Area<br>% | Relative Height<br>% | Amount |
| 1                   |           | 12,410                | 3,516           | 15,279          | 0,87               | 0,62                 | n.a.   |
| 2                   |           | 13,293                | 0,464           | 3,574           | 0,11               | 0,15                 | n.a.   |
| 3                   |           | 19,417                | 240,607         | 1360,620        | 59,44              | 55,31                | n.a.   |
| 4                   |           | 19,667                | 160,180         | 1080,339        | 39,57              | 43,92                | n.a.   |
| <b>Total:</b>       |           |                       | <b>404,768</b>  | <b>2459,812</b> | <b>100,00</b>      | <b>100,00</b>        |        |



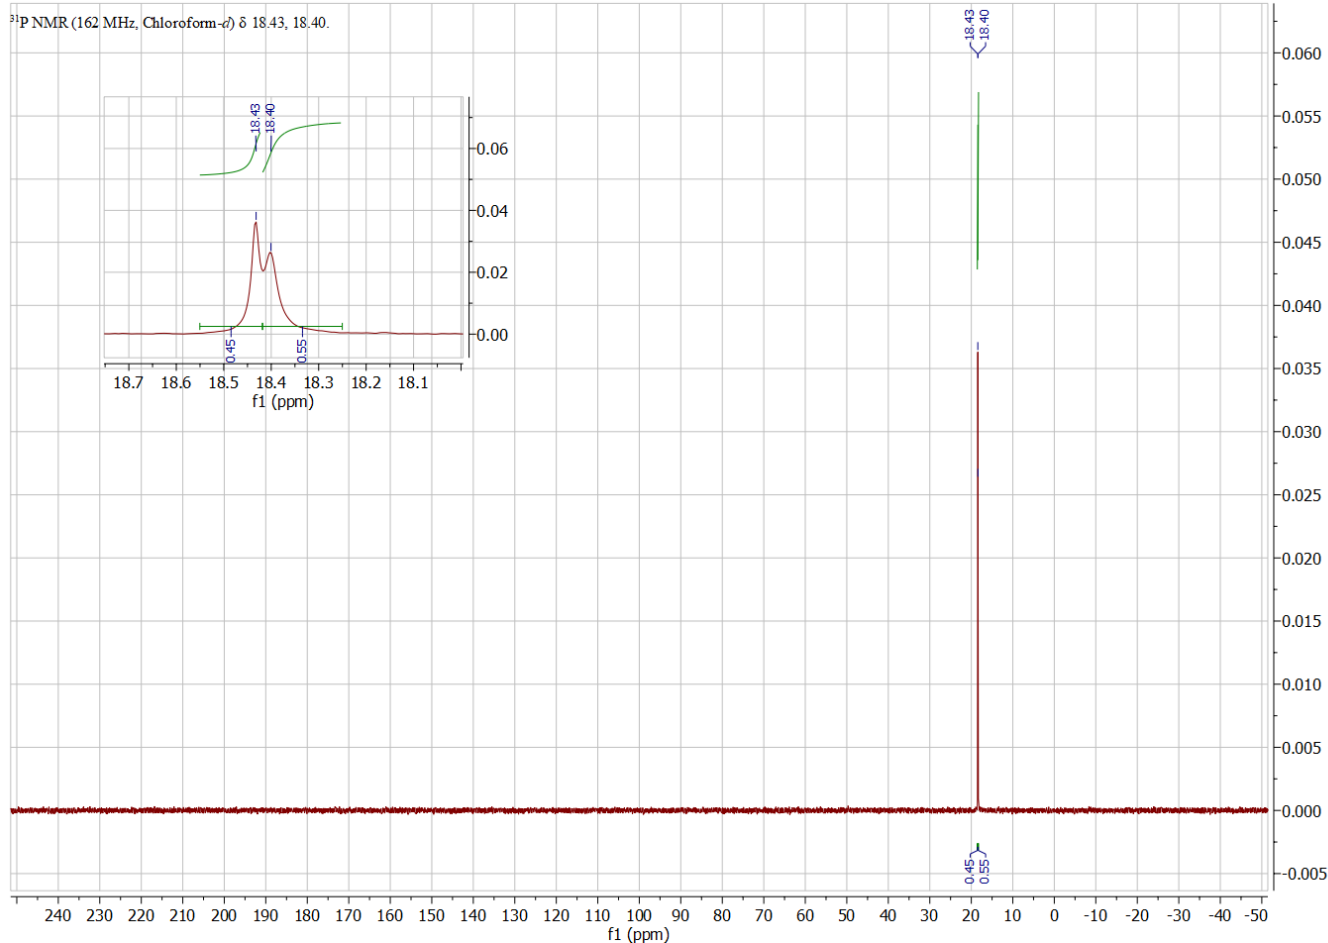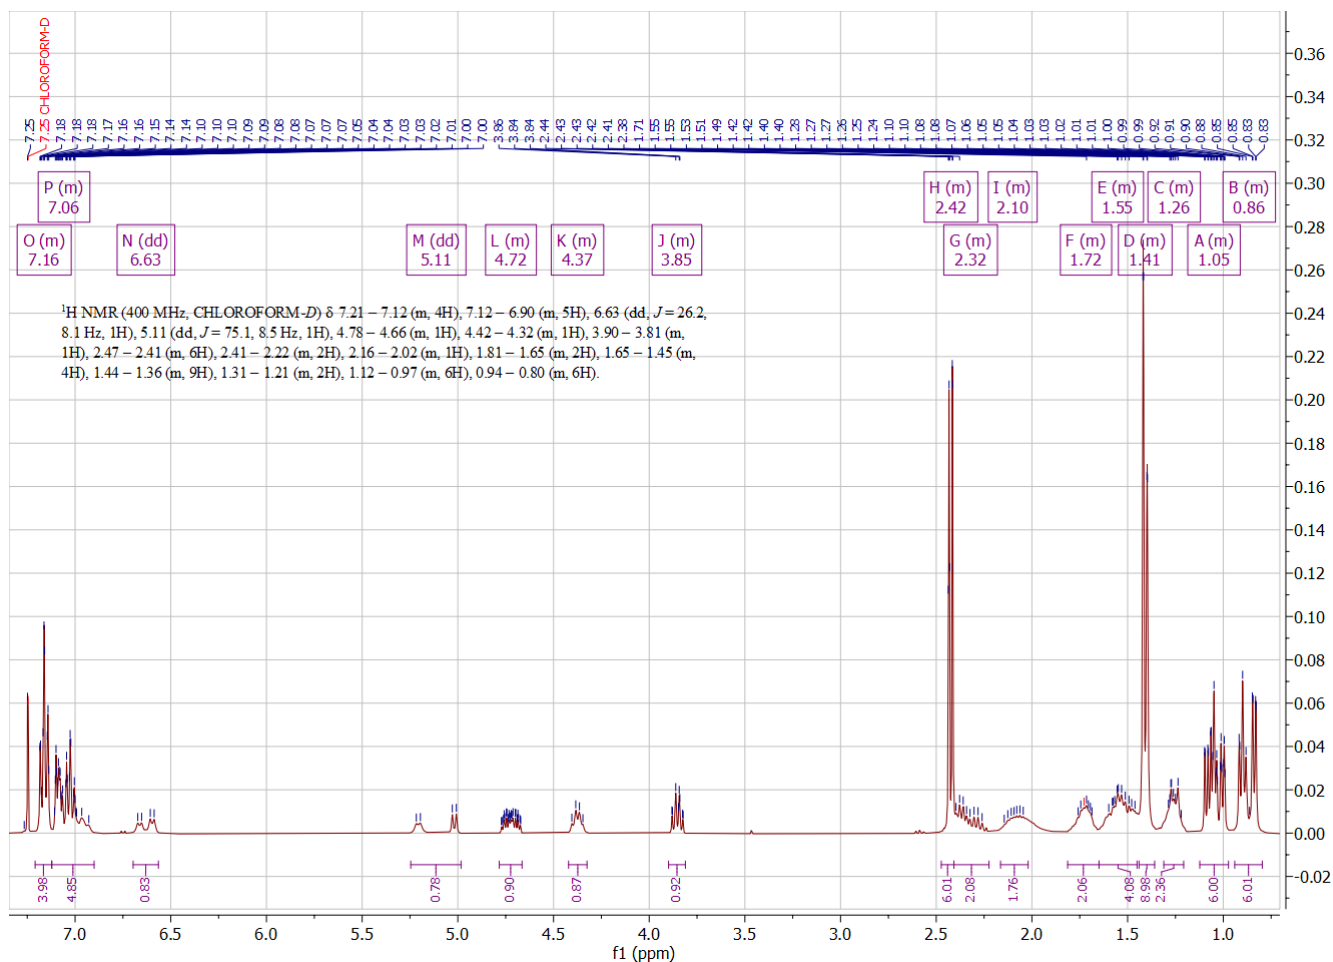

**(36) 344.2 Boc-L-Val-L-Chg-Val<sup>P</sup>(OPh-4-SCH<sub>3</sub>)<sub>2</sub>**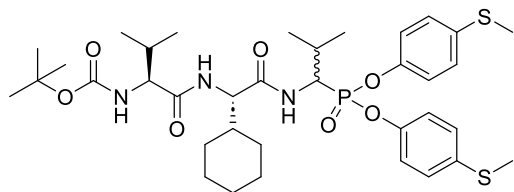

**Name:** *tert*-butyl ((2*S*)-1-(((1*S*)-2-((1-(bis(4-(methylthio)phenoxy)phosphoryl)-2-methylpropyl)amino)-1-cyclohexyl-2-oxoethyl)amino)-3-methyl-1-oxobutan-2-yl)carbamate

<sup>31</sup>P NMR (162 MHz, Chloroform-*d*) δ 18.34 (s).

<sup>1</sup>H NMR (400 MHz, Chloroform-*d*) δ 7.19 – 7.12 (m, 4H, 4xArH), 7.10 – 6.98 (m, 4H, 4xArH), 6.89 (dd, *J* = 34.5, 10.5 Hz, 1H, NH), 6.61 (dd, *J* = 23.7, 8.6 Hz, 1H, NH), 5.14 (dd, *J* = 84.0, 8.2 Hz, 1H, NH), 4.79 – 4.67 (m, 1H, CHP), 4.45 – 4.31 (m, 1H, CH), 3.89 – 3.81 (m, 1H, CH), 2.42 (dd, *J* = 6.4, 1.7 Hz, 6H, 2xSCH<sub>3</sub>), 2.40 – 2.30 (m, 1H, CH), 2.18 – 2.03 (m, 1H, CH), 1.93 – 1.84 (m, 1H, CH), 1.84 – 1.54 (m, 6H, 3xCH<sub>2</sub>), 1.41 (d, *J* = 7.1 Hz, 9H, Boc), 1.17 – 0.93 (m, 10H, 2xCH<sub>3</sub>, 2xCH<sub>2</sub>), 0.92 – 0.77 (m, 6H, 2xCH<sub>3</sub>).

**HRMS:** C<sub>36</sub>H<sub>54</sub>N<sub>3</sub>O<sub>7</sub>PS<sub>2</sub> [M+Na]<sup>+</sup> calc. 758.3038 found 758.3048

**HPLC:** purity >98%; retention time 19.830 and 20.167 min

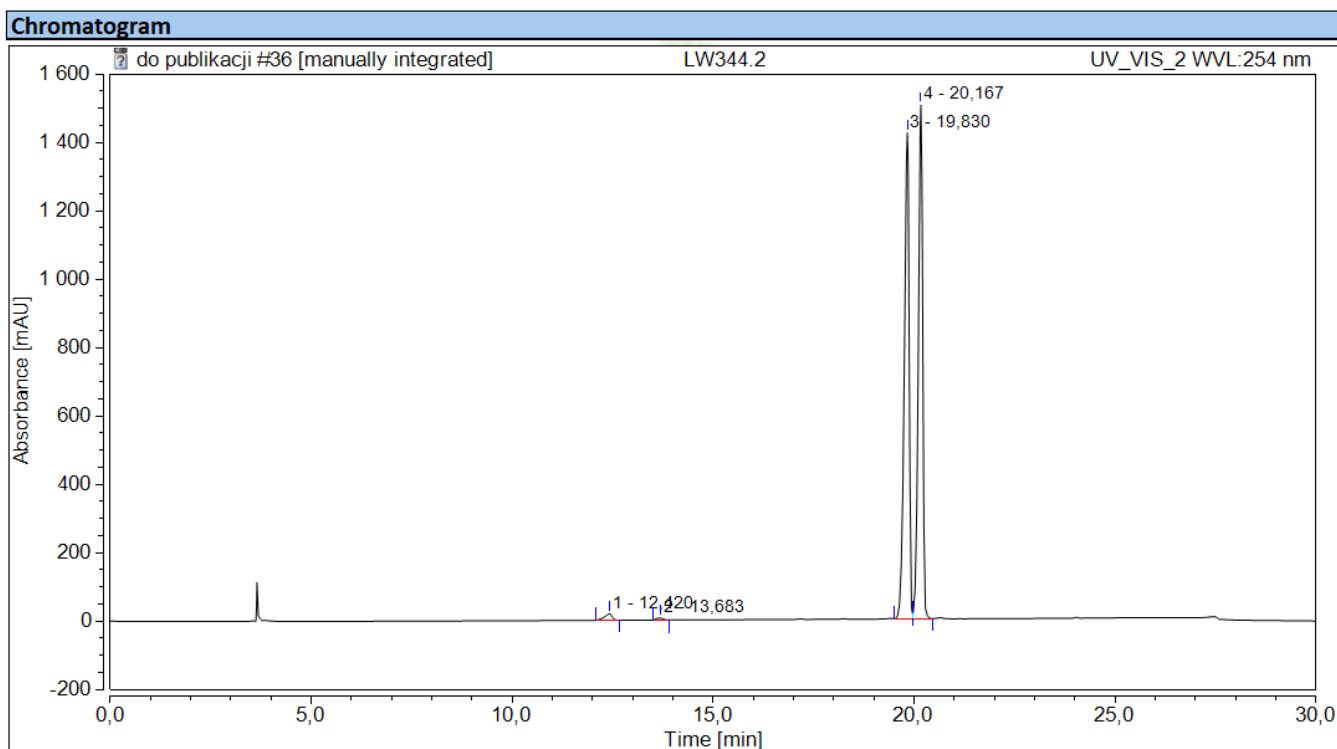

| Integration Results |           |                       |                 |                 |                    |                      |                |
|---------------------|-----------|-----------------------|-----------------|-----------------|--------------------|----------------------|----------------|
| No.                 | Peak Name | Retention Time<br>min | Area<br>mAU*min | Height<br>mAU   | Relative Area<br>% | Relative Height<br>% | Amount<br>n.a. |
| 1                   |           | 12,420                | 4,171           | 19,482          | 1,07               | 0,66                 | n.a.           |
| 2                   |           | 13,683                | 1,126           | 6,356           | 0,29               | 0,22                 | n.a.           |
| 3                   |           | 19,830                | 197,108         | 1420,715        | 50,46              | 48,18                | n.a.           |
| 4                   |           | 20,167                | 188,222         | 1502,174        | 48,18              | 50,94                | n.a.           |
| <b>Total:</b>       |           |                       | <b>390,626</b>  | <b>2948,726</b> | <b>100,00</b>      | <b>100,00</b>        |                |

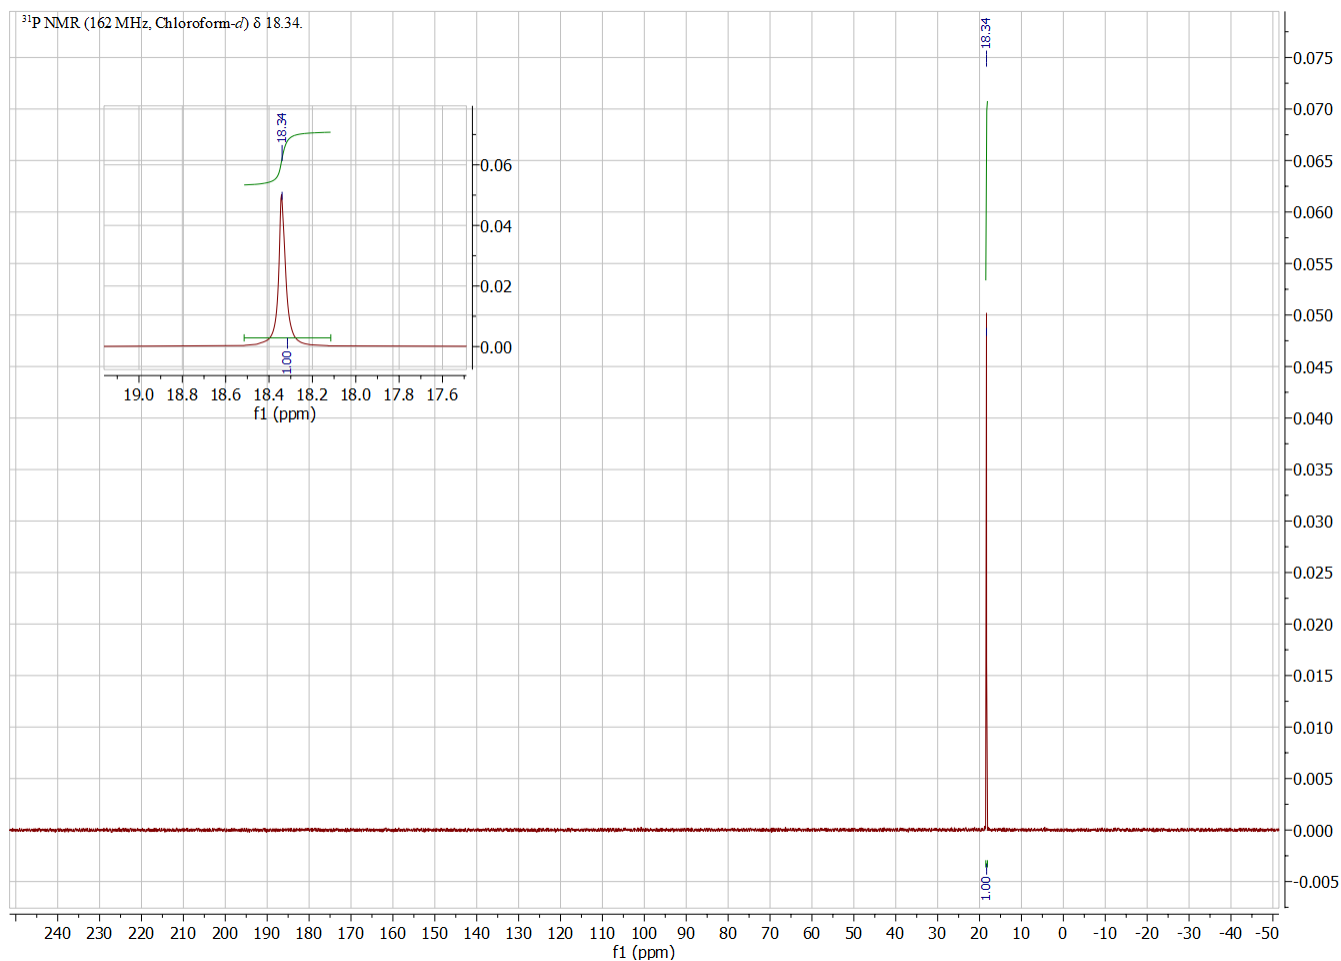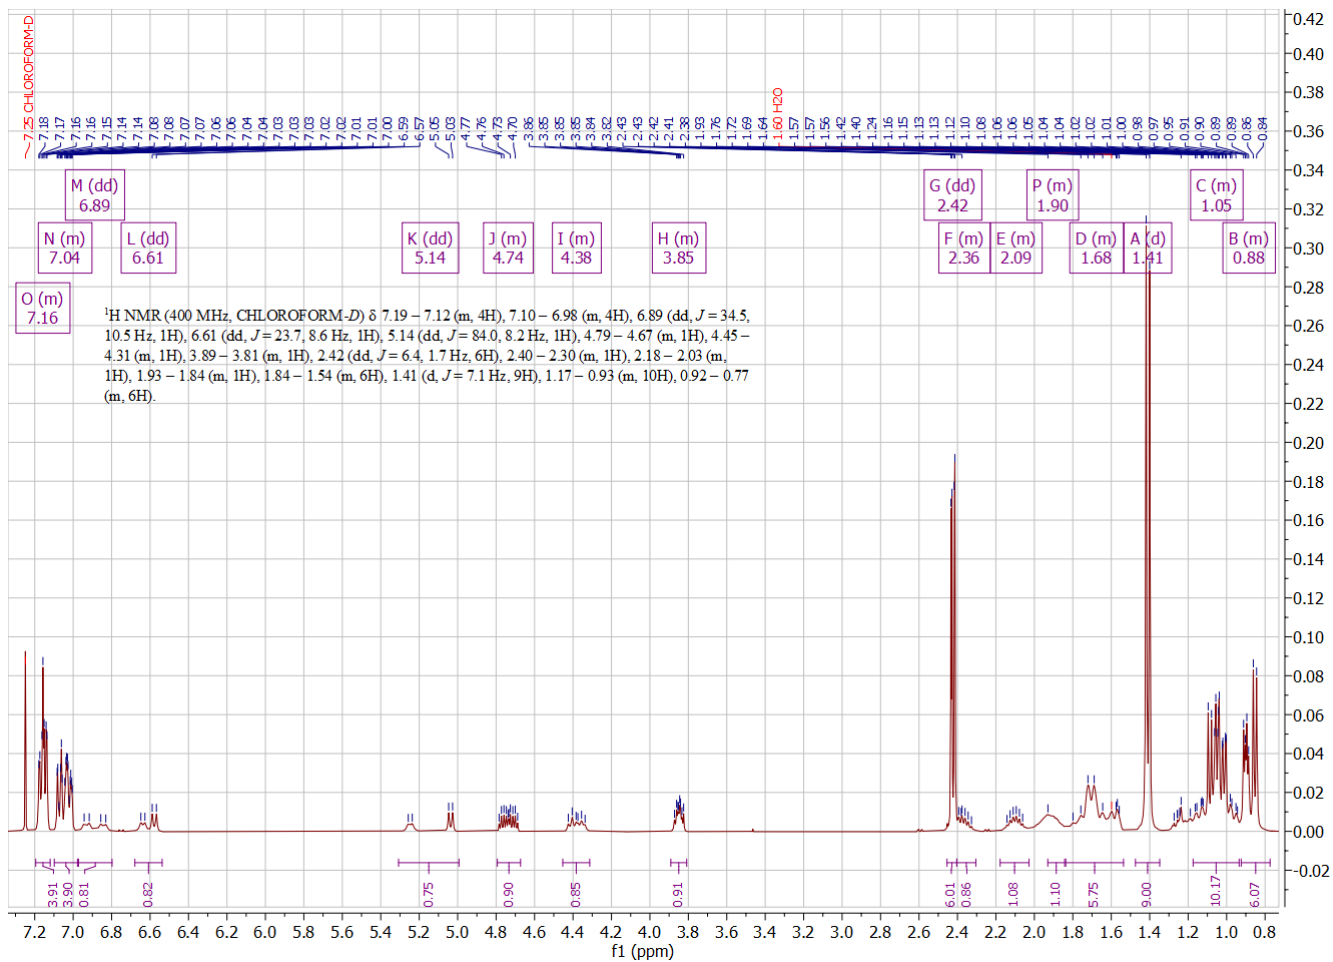

**(37) Boc-L-Val-D-Chg-Val<sup>P</sup>(OPh-4-SCH<sub>3</sub>)<sub>2</sub>**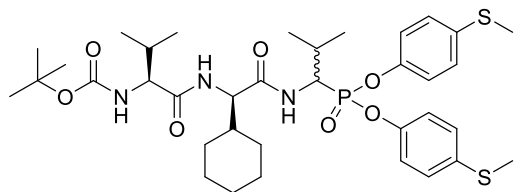

**Name:** *tert*-butyl ((2*S*)-1-(((1*R*)-2-((1-(bis(4-(methylthio)phenoxy)phosphoryl)-2-methylpropyl)amino)-1-cyclohexyl-2-oxoethyl)amino)-3-methyl-1-oxobutan-2-yl)carbamate

<sup>31</sup>P NMR (162 MHz, Chloroform-*d*) δ 18.39 (s, 47%), 18.21 (s, 53%).

<sup>1</sup>H NMR (400 MHz, Chloroform-*d*) δ 7.21 – 6.88 (m, 9H, 8xArH, NH), 6.78 (dd, *J* = 64.0, 7.9 Hz, 1H, NH), 5.43 – 4.92 (m, 1H, NH), 4.81 – 4.65 (m, 1H, CHP), 4.48 – 4.34 (m, 1H, CH), 3.98 – 3.86 (m, 1H, CH), 2.42 (d, *J* = 5.7 Hz, 7H, 2xSCH<sub>3</sub>, CH), 2.19 – 2.08 (m, 1H, CH), 1.97 – 1.47 (m, 7H, 3xCH<sub>2</sub>, CH), 1.40 (d, *J* = 3.3 Hz, 9H, Boc), 1.11 – 1.04 (m, 6H, 2xCH<sub>3</sub>), 1.04 – 0.76 (m, 10H, 2xCH<sub>3</sub>, 2xCH<sub>2</sub>).

**HRMS:** C<sub>36</sub>H<sub>54</sub>N<sub>3</sub>O<sub>7</sub>PS<sub>2</sub> [M+Na]<sup>+</sup> calc. 758.3038 found 758.3044

**HPLC:** purity >98%; retention time 19.970 and 20.277 min

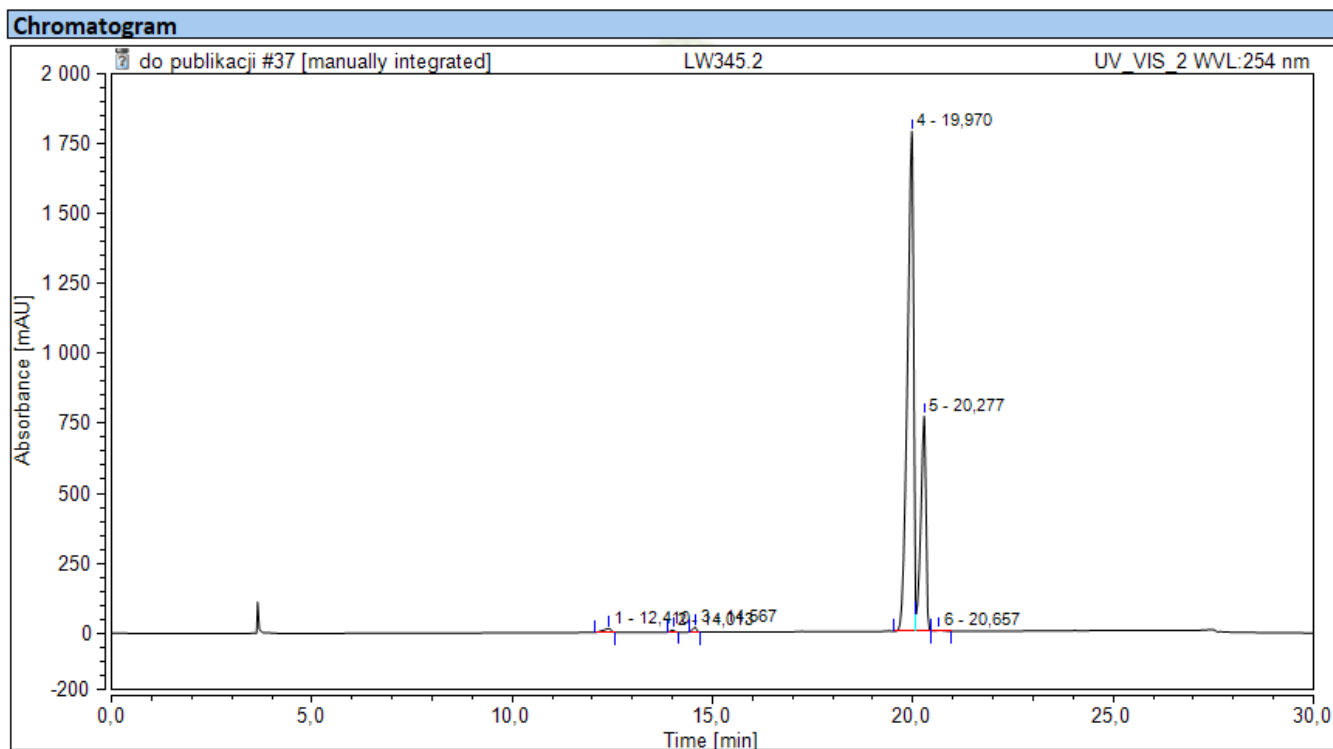

| Integration Results |           |                       |                 |                 |                    |                      |        |
|---------------------|-----------|-----------------------|-----------------|-----------------|--------------------|----------------------|--------|
| No.                 | Peak Name | Retention Time<br>min | Area<br>mAU*min | Height<br>mAU   | Relative Area<br>% | Relative Height<br>% | Amount |
| 1                   |           | 12.410                | 3.235           | 14.505          | 0.74               | 0.56                 | n.a.   |
| 2                   |           | 14.013                | 0.850           | 7.091           | 0.19               | 0.27                 | n.a.   |
| 3                   |           | 14.567                | 2.034           | 17.931          | 0.46               | 0.69                 | n.a.   |
| 4                   |           | 19.970                | 317.954         | 1788.303        | 72.27              | 68.77                | n.a.   |
| 5                   |           | 20.277                | 114.974         | 769.457         | 26.13              | 29.59                | n.a.   |
| 6                   |           | 20.657                | 0.912           | 3.168           | 0.21               | 0.12                 | n.a.   |
| <b>Total:</b>       |           |                       | <b>439,958</b>  | <b>2600,456</b> | <b>100,00</b>      | <b>100,00</b>        |        |

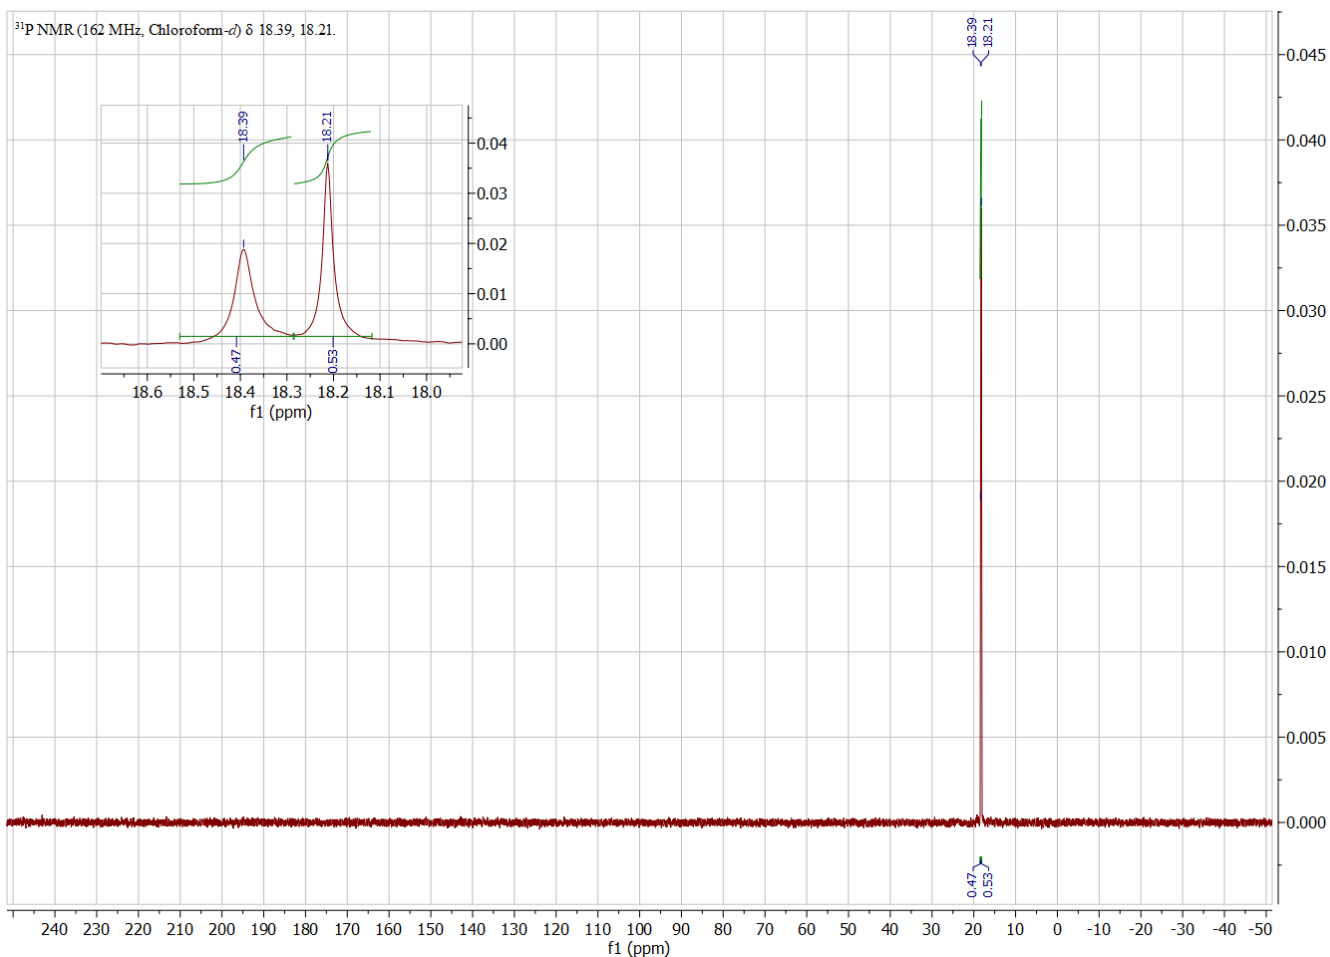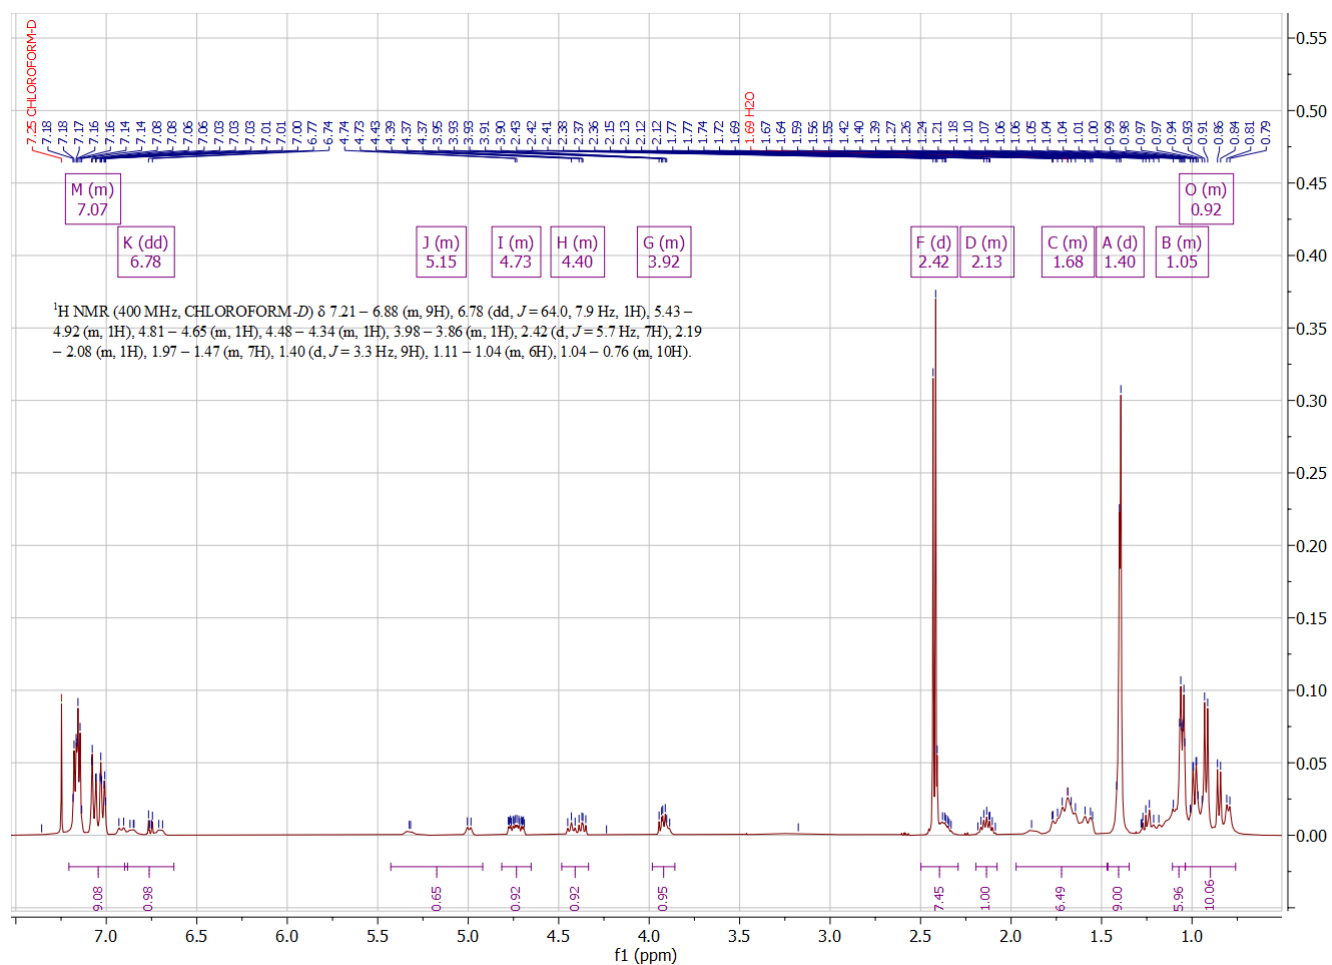

**(38) Boc-L-Val-L-Phe- Val<sup>P</sup>(OPh-4-SCH<sub>3</sub>)<sub>2</sub>**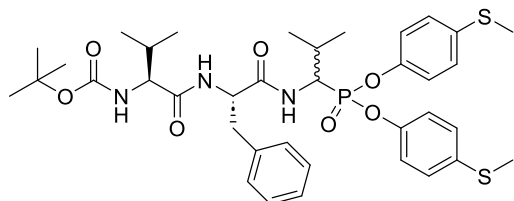

**Name:** *tert*-butyl ((2*S*)-1-(((2*S*)-1-((1-(bis(4-(methylthio)phenoxy)phosphoryl)-2-methylpropyl)amino)-1-oxo-3-phenylpropan-2-yl)amino)-3-methyl-1-oxobutan-2-yl)carbamate

<sup>31</sup>P NMR (162 MHz, Chloroform-*d*) δ 18.13 (s, 48%), 18.01 (s, 52%).

<sup>1</sup>H NMR (400 MHz, Chloroform-*d*) δ 7.25 (s, 10H, 9xArH, NH), 7.10 – 7.00 (m, 4H, 4xArH), 6.61 – 6.50 (m, 1H, NH), 4.89 – 4.77 (m, 1H, NH), 4.77 – 4.61 (m, 2H, CHP, CH), 3.89 – 3.81 (m, 1H, CH), 3.14 – 2.98 (m, 2H, CH<sub>2</sub>), 2.44 – 2.40 (m, 6H, 2xSCH<sub>3</sub>), 2.40 – 2.23 (m, 1H, CH), 2.18 – 1.98 (m, 1H, CH), 1.39 (d, *J* = 4.1 Hz, 9H, Boc), 1.04 – 0.96 (m, 3H, CH<sub>3</sub>), 0.94 – 0.78 (m, 6H, 2xCH<sub>3</sub>), 0.73 (dd, *J* = 16.6, 6.5 Hz, 3H, CH<sub>3</sub>).

**HRMS:** C<sub>37</sub>H<sub>50</sub>N<sub>3</sub>O<sub>7</sub>PS<sub>2</sub> [M+Na]<sup>+</sup> calc. 766.2725 found 766.2703

**HPLC:** purity >99%; retention time 19.513 min

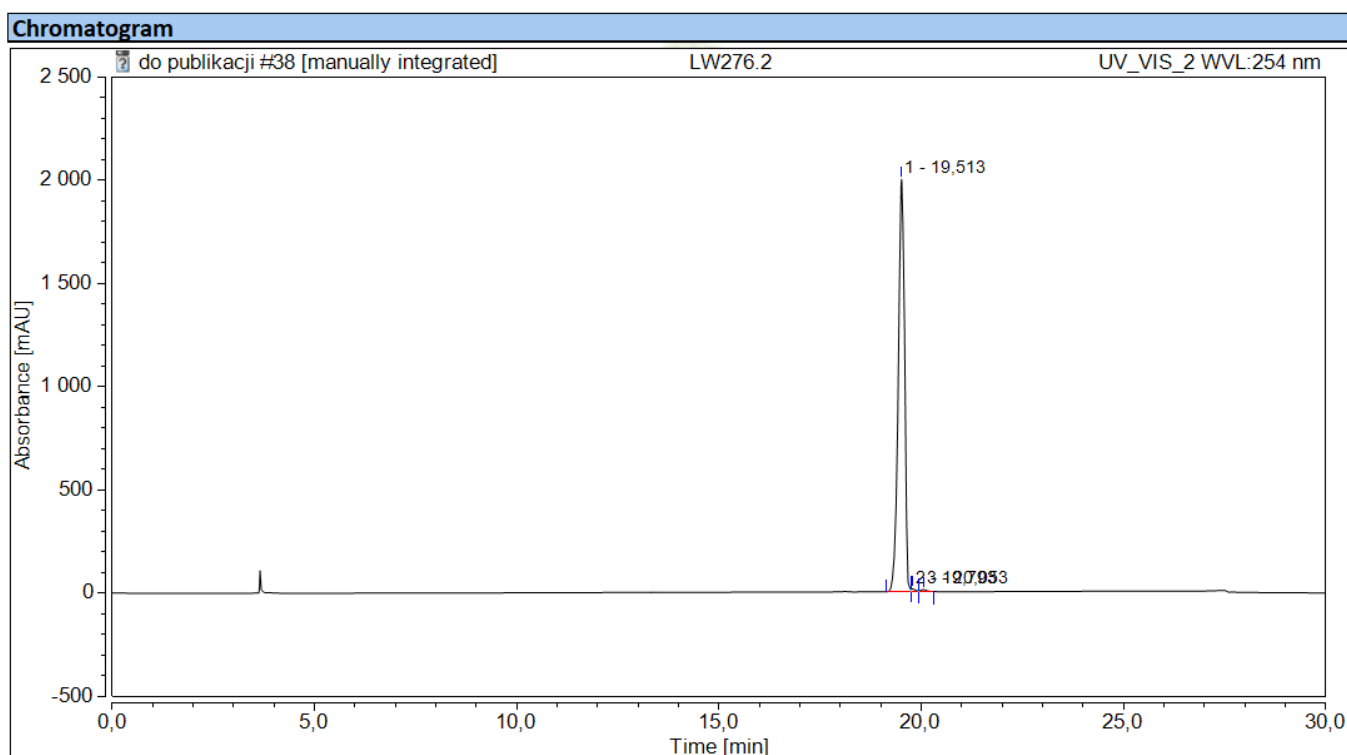

| Integration Results |           |                    |                |                 |                 |                   |             |
|---------------------|-----------|--------------------|----------------|-----------------|-----------------|-------------------|-------------|
| No.                 | Peak Name | Retention Time min | Area mAU*min   | Height mAU      | Relative Area % | Relative Height % | Amount n.a. |
| 1                   |           | 19,513             | 361,273        | 1997,430        | 99,09           | 98,82             | n.a.        |
| 2                   |           | 19,793             | 1,592          | 13,202          | 0,44            | 0,65              | n.a.        |
| 3                   |           | 20,053             | 1,730          | 10,573          | 0,47            | 0,52              | n.a.        |
| <b>Total:</b>       |           |                    | <b>364,596</b> | <b>2021,205</b> | <b>100,00</b>   | <b>100,00</b>     |             |

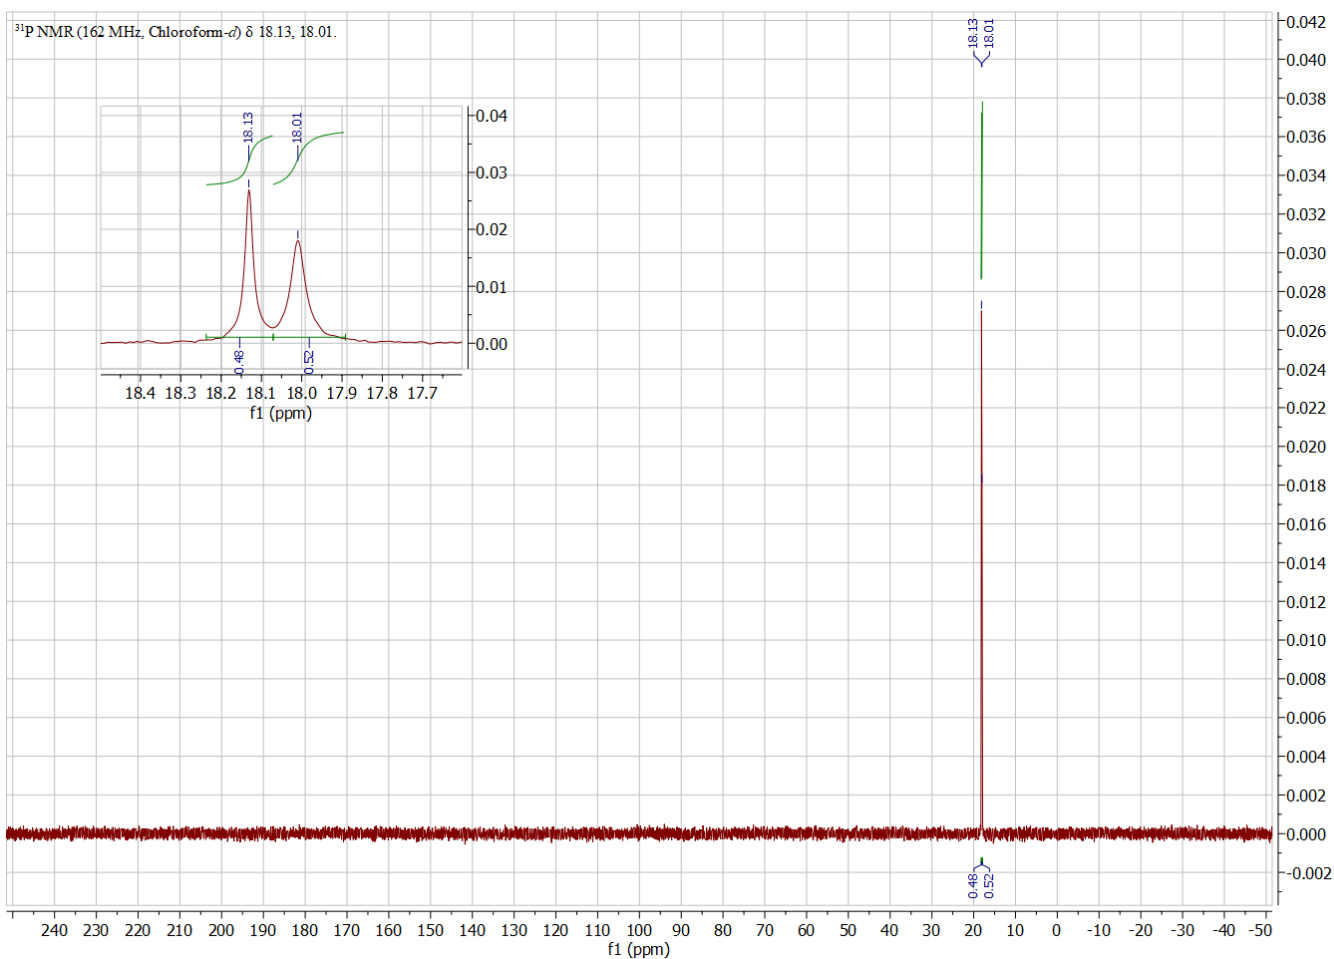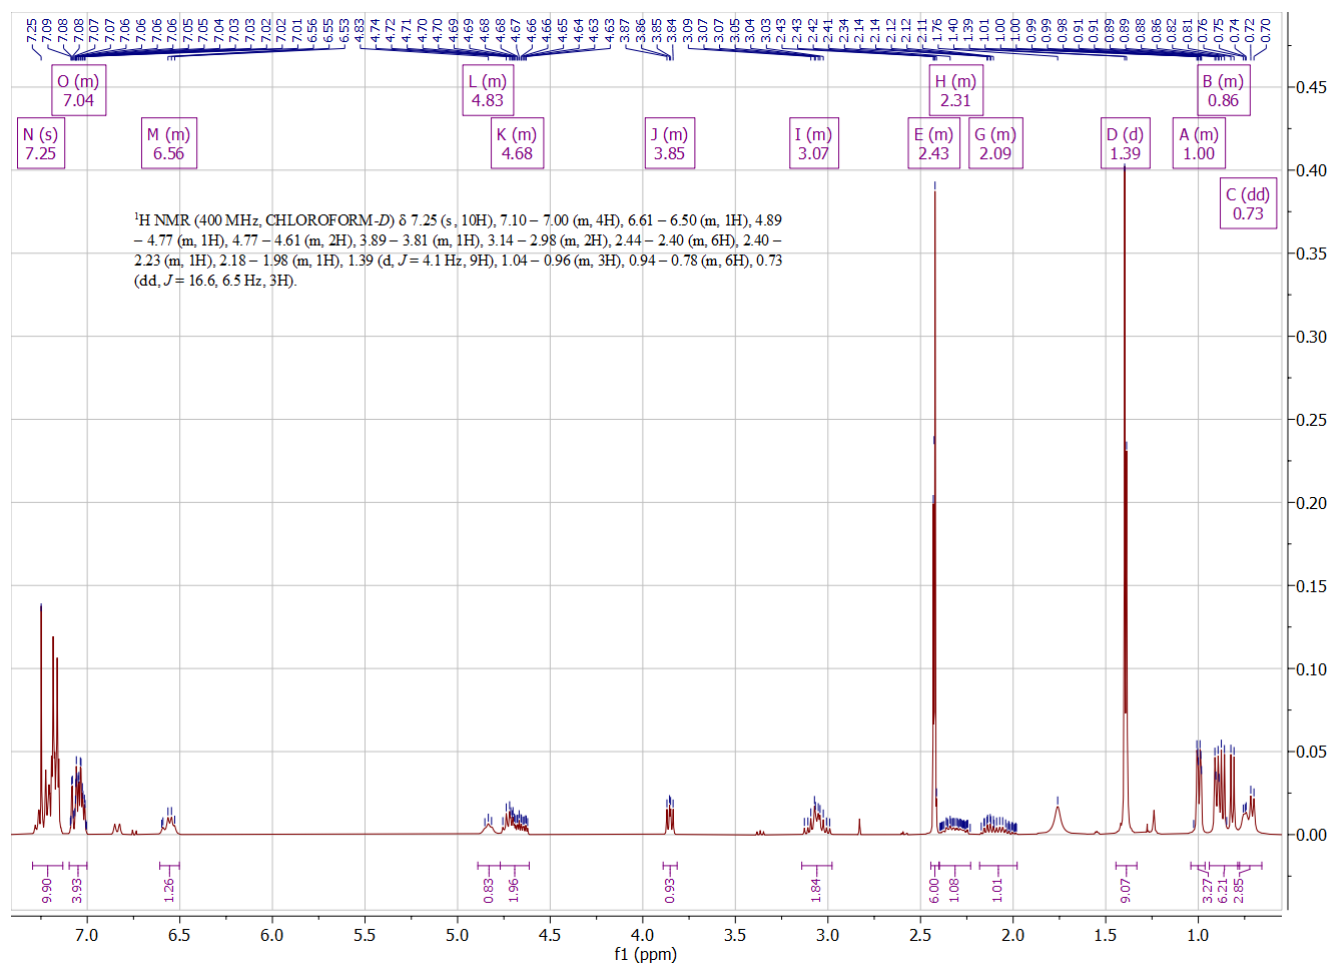

**(39) Boc-L-Val-D-Phe-Val<sup>P</sup>(OPh-4-SCH<sub>3</sub>)<sub>2</sub>**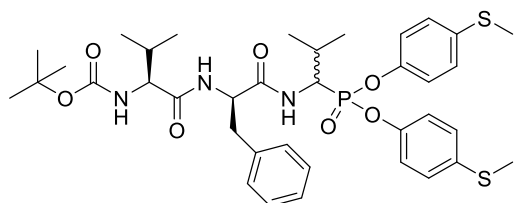

**Name:** *tert*-butyl ((2*S*)-1-(((2*R*)-1-((1-(bis(4-(methylthio)phenoxy)phosphoryl)-2-methylpropyl)amino)-1-oxo-3-phenylpropan-2-yl)amino)-3-methyl-1-oxobutan-2-yl)carbamate

<sup>31</sup>P NMR (162 MHz, Chloroform-*d*) δ 18.12 (s, 40%), 17.87 (s, 60%).

<sup>1</sup>H NMR (400 MHz, Chloroform-*d*) δ 7.24 – 7.13 (m, 9H, 9xArH), 7.12 – 6.75 (m, 5H, 4xArH, NH), 6.48 (dd, *J* = 103.3, 7.8 Hz, 1H, NH), 4.99 (dd, *J* = 43.9, 8.4 Hz, 1H, NH), 4.81 – 4.60 (m, 2H, CHP, CH), 3.86 – 3.71 (m, 1H, CH), 3.22 – 2.85 (m, 2H, CH<sub>2</sub>), 2.49 – 2.41 (m, 6H, 2xSCH<sub>3</sub>), 2.41 – 2.24 (m, 1H, CH), 1.98 – 1.81 (m, 1H, CH), 1.38 (d, *J* = 2.2 Hz, 9H, Boc), 1.05 – 0.88 (m, 6H, 2xCH<sub>3</sub>), 0.78 – 0.63 (m, 6H, 2xCH<sub>3</sub>).

**HRMS:** C<sub>37</sub>H<sub>50</sub>N<sub>3</sub>O<sub>7</sub>PS<sub>2</sub> [M+Na]<sup>+</sup> calc. 766.2725 found 766.2735

**HPLC:** purity >99%; retention time 19.783 min

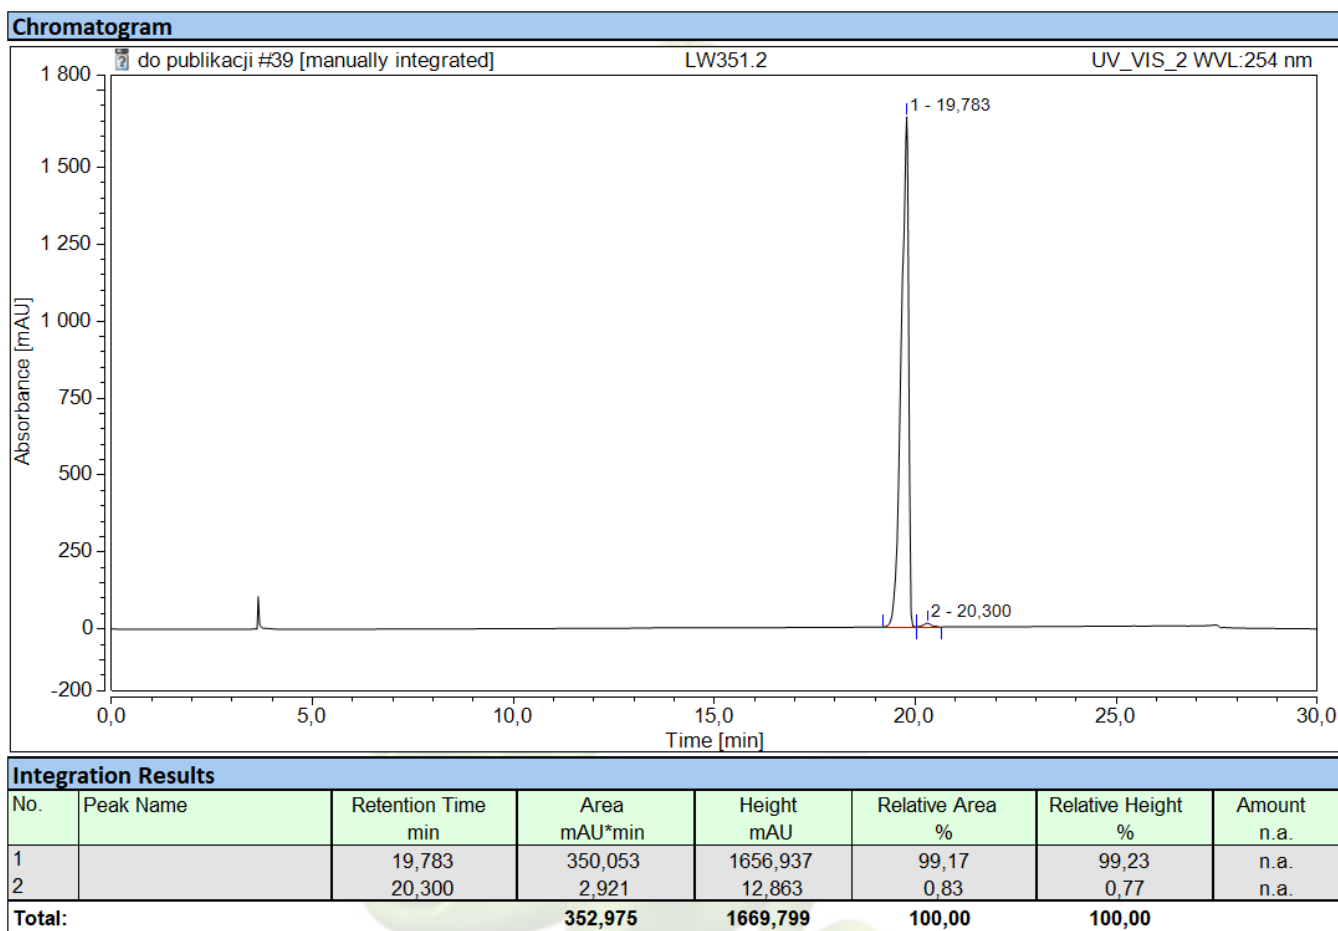



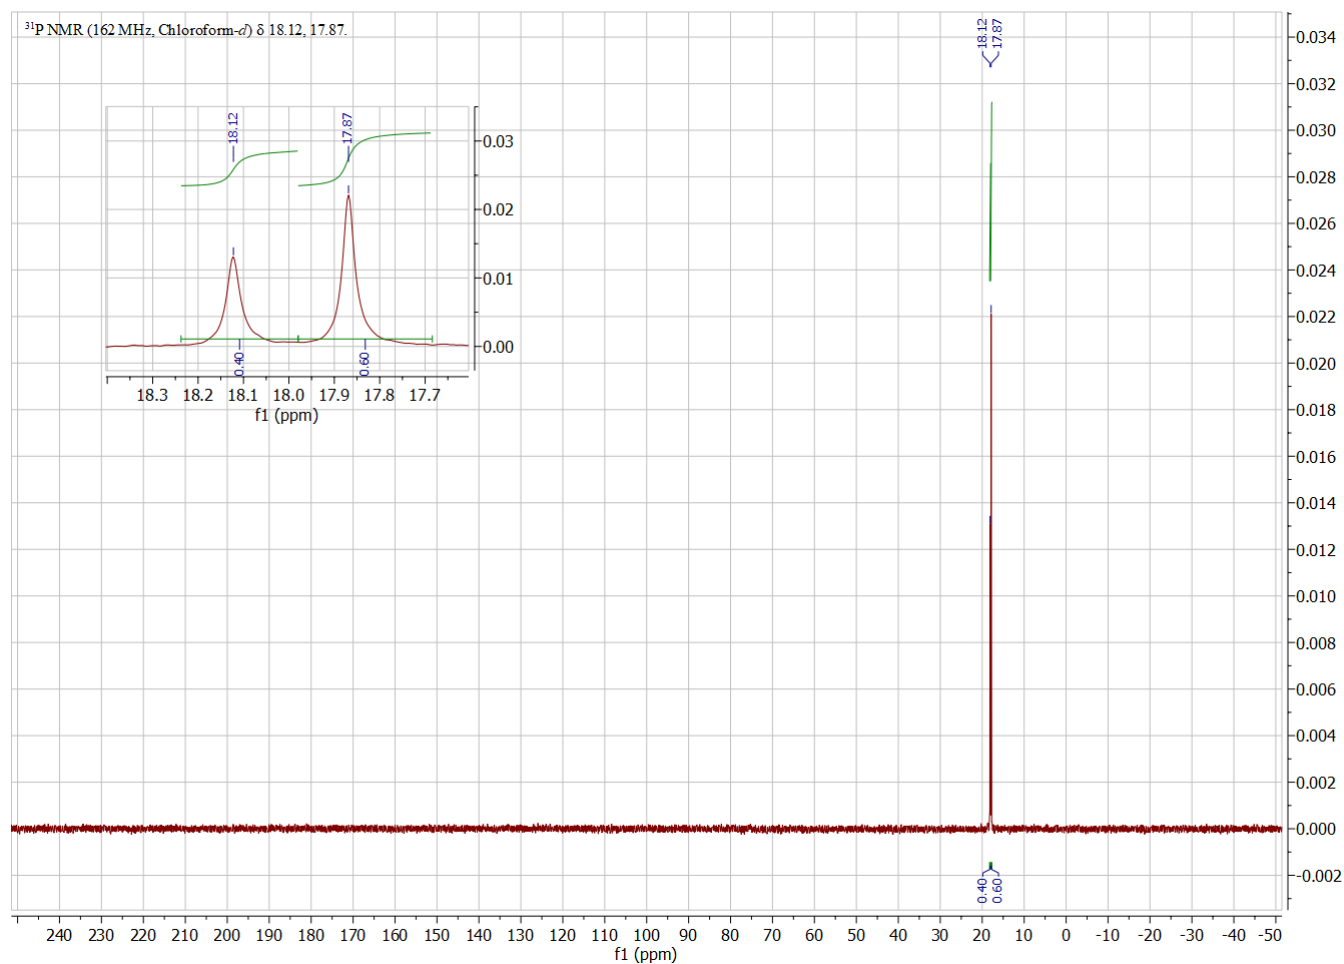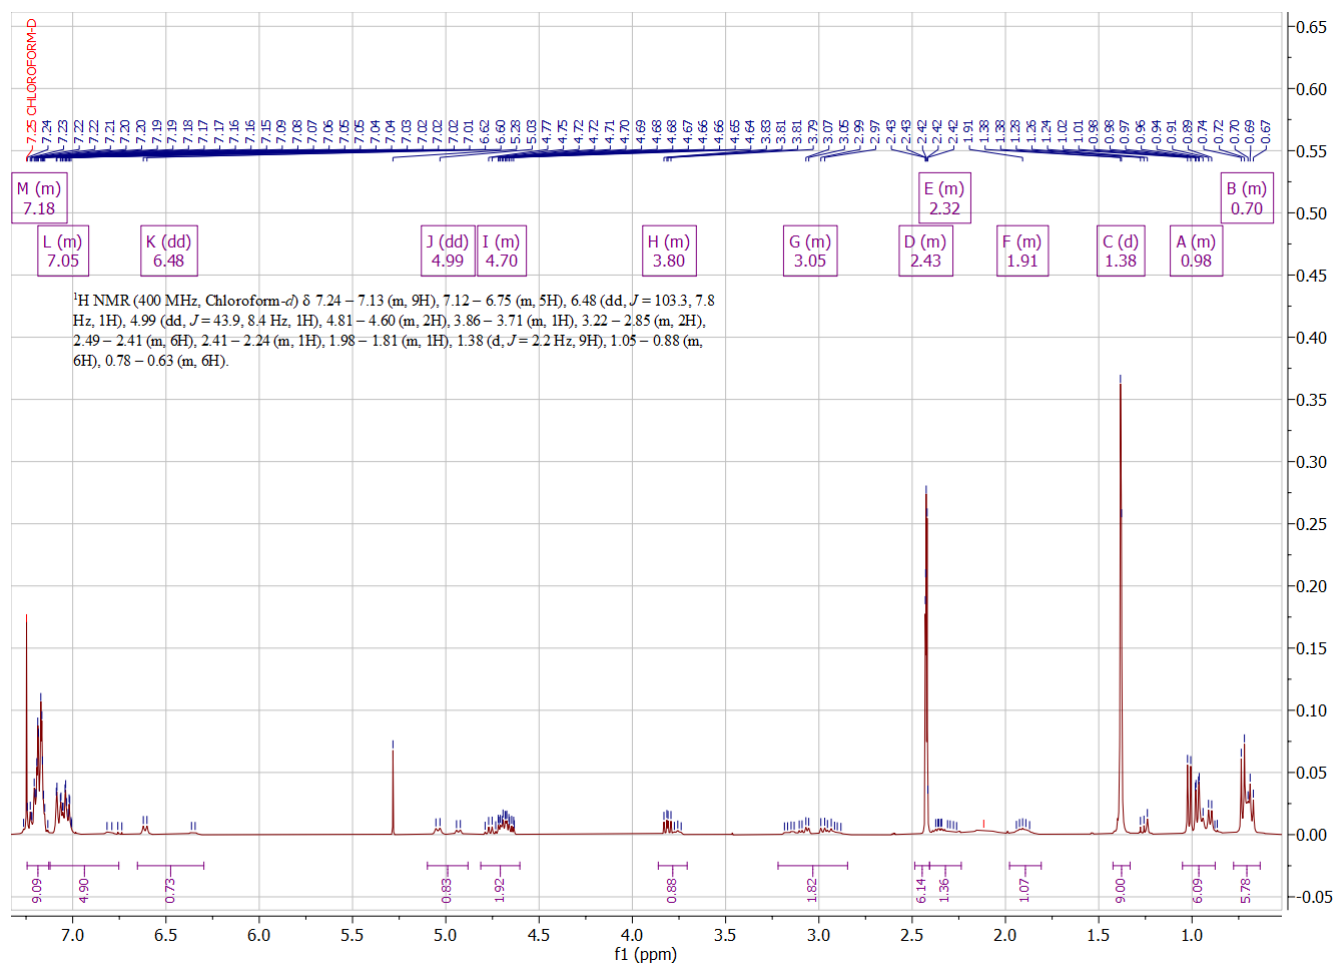

**(40) Boc-L-Val-L-Cha- Val<sup>P</sup>(OPh-4-SCH<sub>3</sub>)<sub>2</sub>**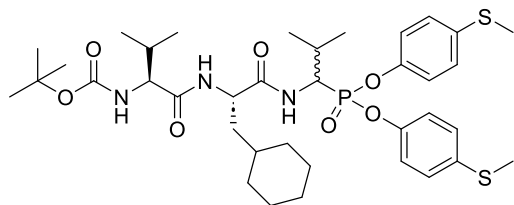

**Name:** *tert*-butyl ((2*S*)-1-(((2*S*)-1-((1-(bis(4-(methylthio)phenoxy)phosphoryl)-2-methylpropyl)amino)-3-cyclohexyl-1-oxopropan-2-yl)amino)-3-methyl-1-oxobutan-2-yl)carbamate

<sup>31</sup>P NMR (162 MHz, Chloroform-*d*) δ 18.36 (s, 56%), 18.17 (s, 44%).

<sup>1</sup>H NMR (400 MHz, Chloroform-*d*) δ 7.21 – 7.13 (m, 4H, 4xArH), 7.13 – 7.01 (m, 4H, 4xArH), 6.87 (d, *J* = 10.4 Hz, 1H, NH), 6.43 (d, *J* = 7.2 Hz, 1H, NH), 5.03 (dd, *J* = 50.2, 8.3 Hz, 1H, NH), 4.76 – 4.64 (m, 1H, CHP), 4.57 – 4.45 (m, 1H, CH), 3.92 – 3.81 (m, 1H, CH), 2.46 – 2.41 (m, 6H, 2xSCH<sub>3</sub>), 2.41 – 2.31 (m, 1H, CH), 2.17 – 2.03 (m, 1H, CH), 1.76 – 1.47 (m, 7H, 3xCH<sub>2</sub>, CH), 1.41 (d, *J* = 6.7 Hz, 9H, Boc), 1.34 – 1.23 (m, 2H, CH<sub>2</sub>), 1.13 – 1.00 (m, 8H, 2xCH<sub>3</sub>, CH<sub>2</sub>), 0.93 – 0.80 (m, 8H, 2xCH<sub>3</sub>, CH<sub>2</sub>).

**HRMS:** C<sub>37</sub>H<sub>56</sub>N<sub>3</sub>O<sub>7</sub>PS<sub>2</sub> [M+Na]<sup>+</sup> calc. 772.3195 found 772.3164

**HPLC:** purity >98%; retention time 20.510 and 20.840 min

**Chromatogram**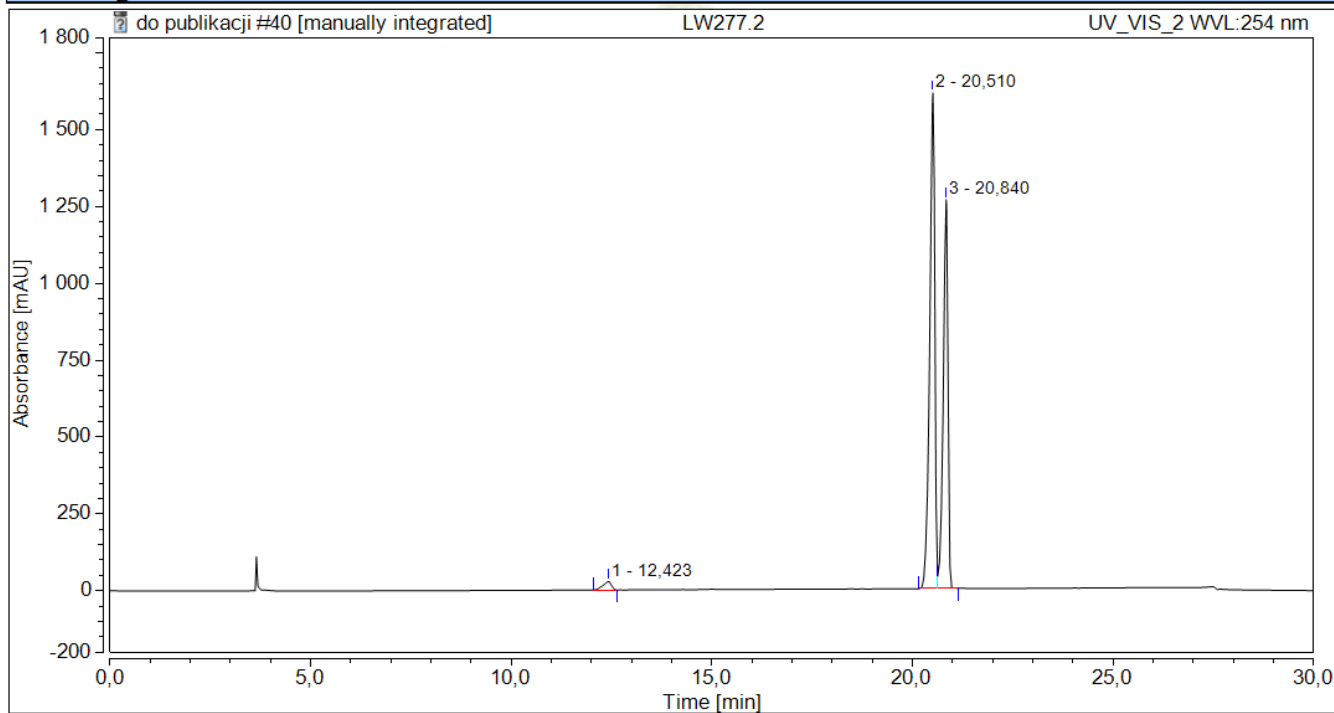**Integration Results**

| No.           | Peak Name | Retention Time<br>min | Area<br>mAU*min | Height<br>mAU   | Relative Area<br>% | Relative Height<br>% | Amount<br>n.a. |
|---------------|-----------|-----------------------|-----------------|-----------------|--------------------|----------------------|----------------|
| 1             |           | 12,423                | 6,650           | 28,147          | 1,62               | 0,97                 | n.a.           |
| 2             |           | 20,510                | 235,122         | 1612,276        | 57,11              | 55,50                | n.a.           |
| 3             |           | 20,840                | 169,933         | 1264,335        | 41,28              | 43,53                | n.a.           |
| <b>Total:</b> |           |                       | <b>411,706</b>  | <b>2904,757</b> | <b>100,00</b>      | <b>100,00</b>        |                |

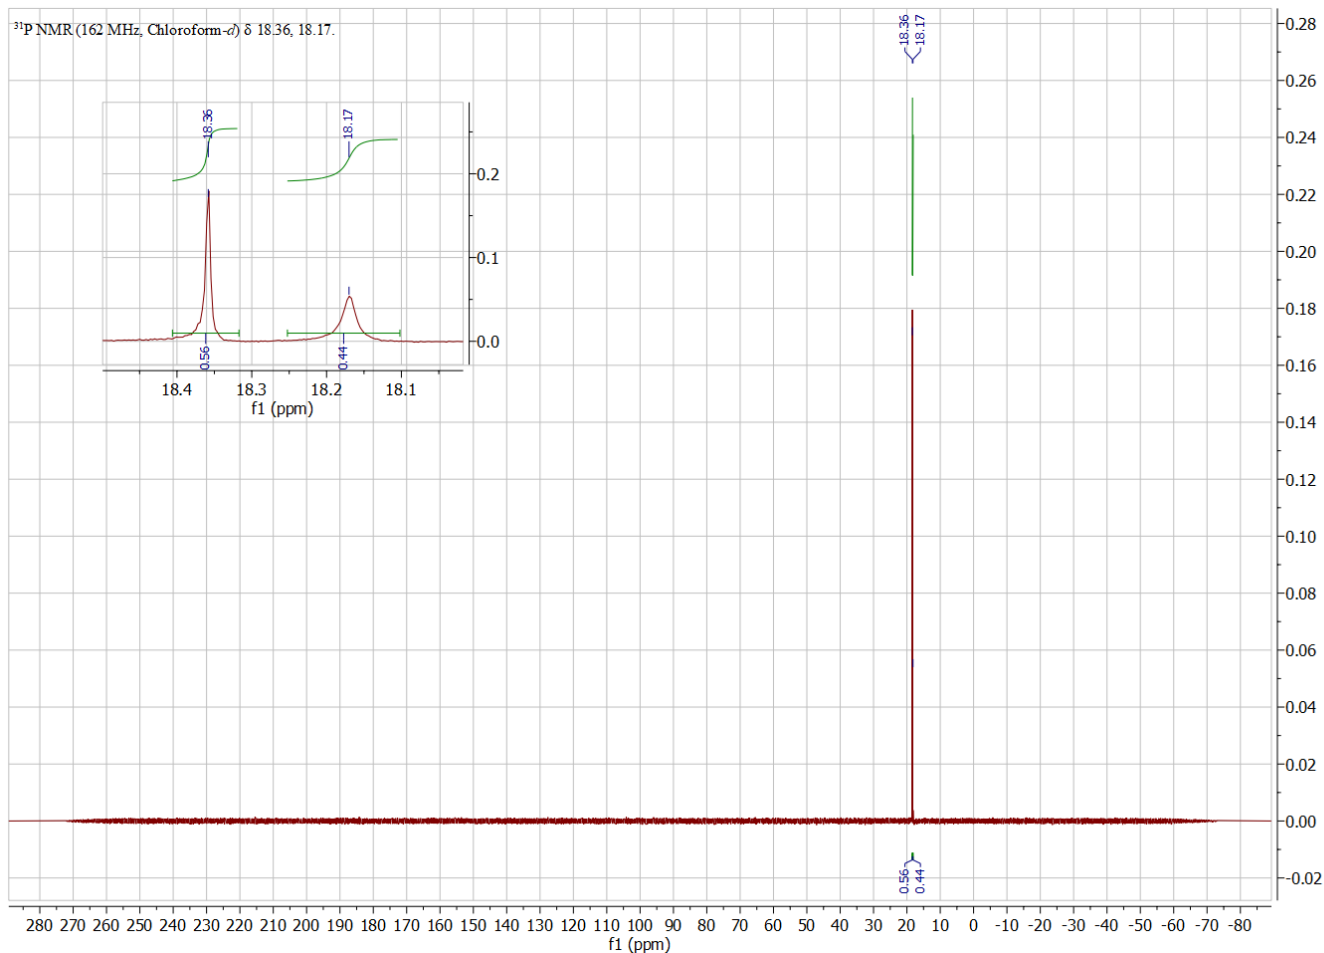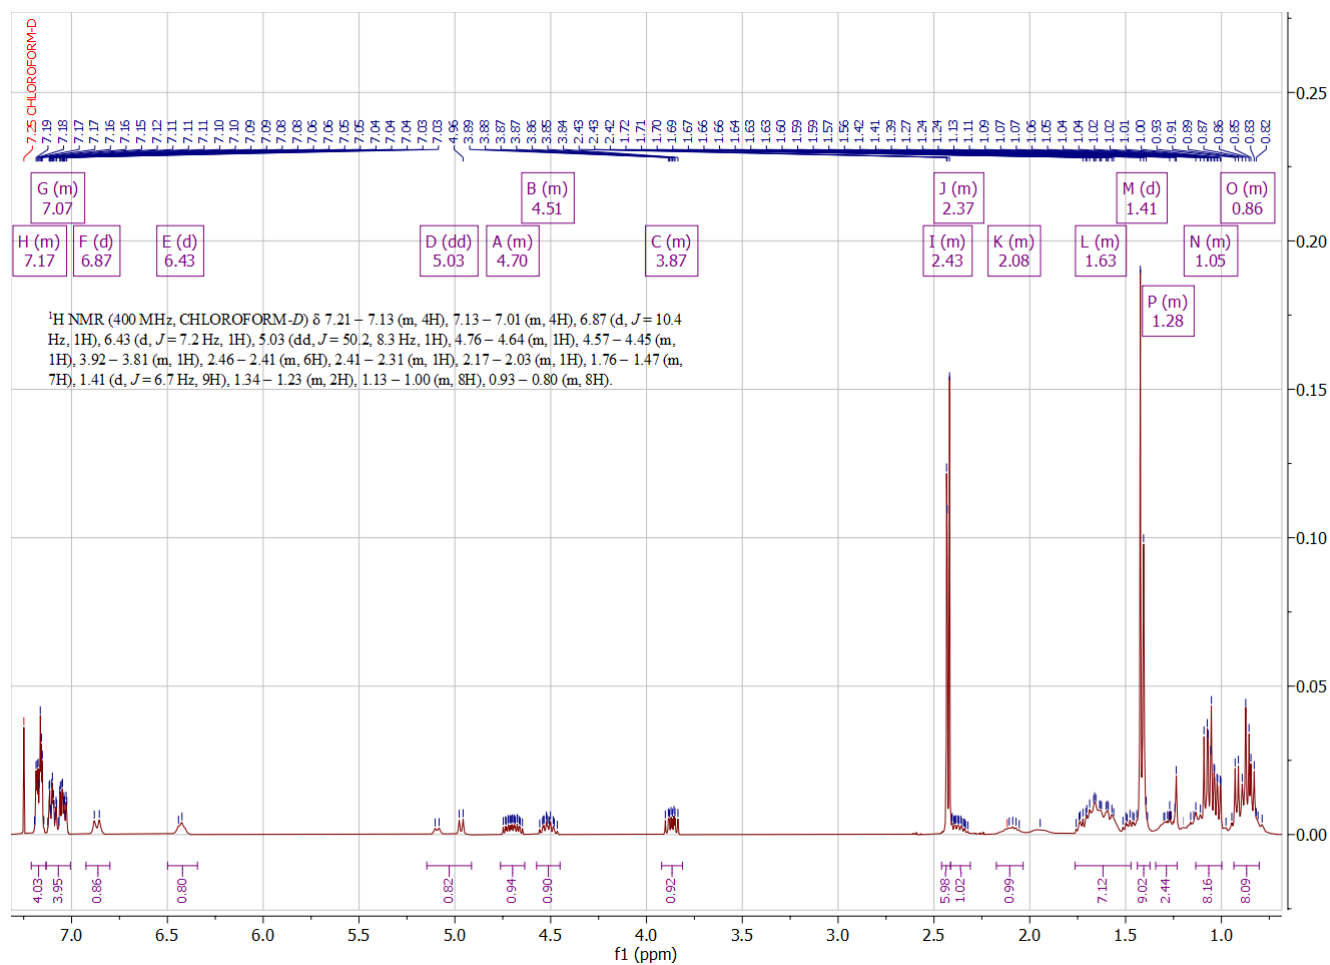

**(41) Boc-L-Val-D-Igl-Val<sup>P</sup>(OPh-4-SCH<sub>3</sub>)<sub>2</sub>**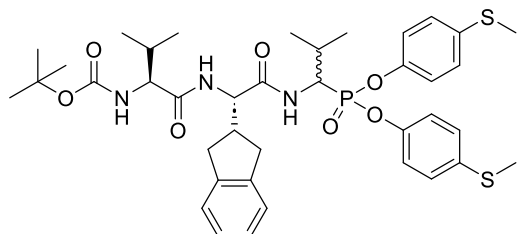

**Name:** *tert*-butyl ((2*S*)-1-(((1*S*)-2-((1-(bis(4-(methylthio)phenoxy)phosphoryl)-2-methylpropyl)amino)-1-(2,3-dihydro-1*H*-inden-2-yl)-2-oxoethyl)amino)-3-methyl-1-oxobutan-2-yl)carbamate

<sup>31</sup>P NMR (162 MHz, Chloroform-*d*) δ 18.32 (s, 42%), 18.27 (s, 58%).

<sup>1</sup>H NMR (400 MHz, Chloroform-*d*) δ 7.24 – 6.91 (m, 13H, 12xArH, NH), 6.64 (td, *J* = 9.1, 9.1 Hz, 1H, NH), 5.30 – 5.01 (m, 1H, NH), 4.82 – 4.59 (m, 2H, CHP, CH), 3.88 – 3.78 (m, 1H, CH), 3.13 – 2.88 (m, 3H, CH<sub>2</sub>, CH), 2.82 – 2.64 (m, 2H, CH<sub>2</sub>), 2.45 – 2.39 (m, 6H, 2xSCH<sub>3</sub>), 2.40 – 2.24 (m, 1H, CH), 2.17 – 2.02 (m, 1H, CH), 1.41 (d, *J* = 15.9 Hz, 9H, Boc), 1.13 – 0.98 (m, 6H, 2xCH<sub>3</sub>), 0.92 – 0.75 (m, 6H, 2xCH<sub>3</sub>)

**HRMS:** C<sub>39</sub>H<sub>52</sub>N<sub>3</sub>O<sub>7</sub>PS<sub>2</sub> [M+Na]<sup>+</sup> calc. 792.2882 found 792.2878

**HPLC:** purity >98%; retention time 19.860 and 20.143 min

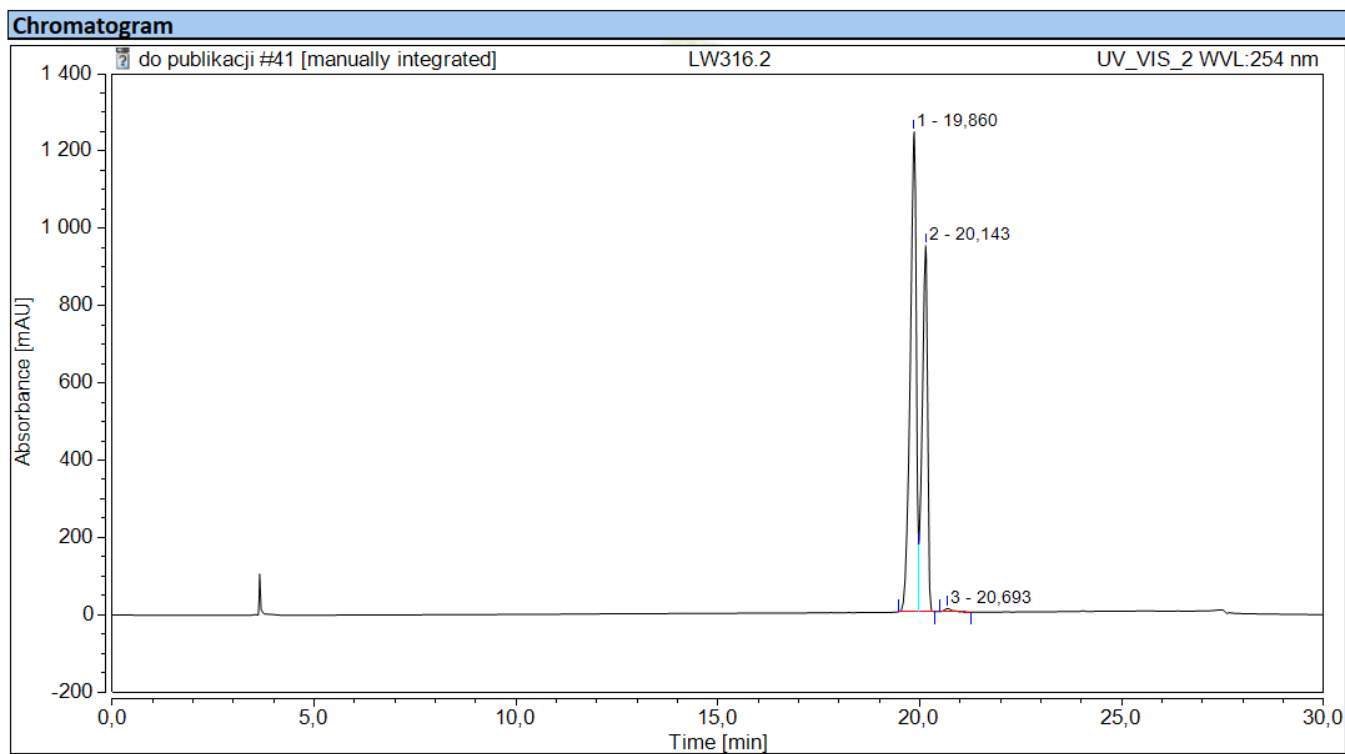

| Integration Results |           |                    |                |                 |                 |                   |             |
|---------------------|-----------|--------------------|----------------|-----------------|-----------------|-------------------|-------------|
| No.                 | Peak Name | Retention Time min | Area mAU*min   | Height mAU      | Relative Area % | Relative Height % | Amount n.a. |
| 1                   |           | 19,860             | 216,488        | 1241,757        | 59,59           | 56,51             | n.a.        |
| 2                   |           | 20,143             | 144,883        | 947,324         | 39,88           | 43,11             | n.a.        |
| 3                   |           | 20,693             | 1,897          | 8,412           | 0,52            | 0,38              | n.a.        |
| <b>Total:</b>       |           |                    | <b>363,267</b> | <b>2197,493</b> | <b>100,00</b>   | <b>100,00</b>     |             |

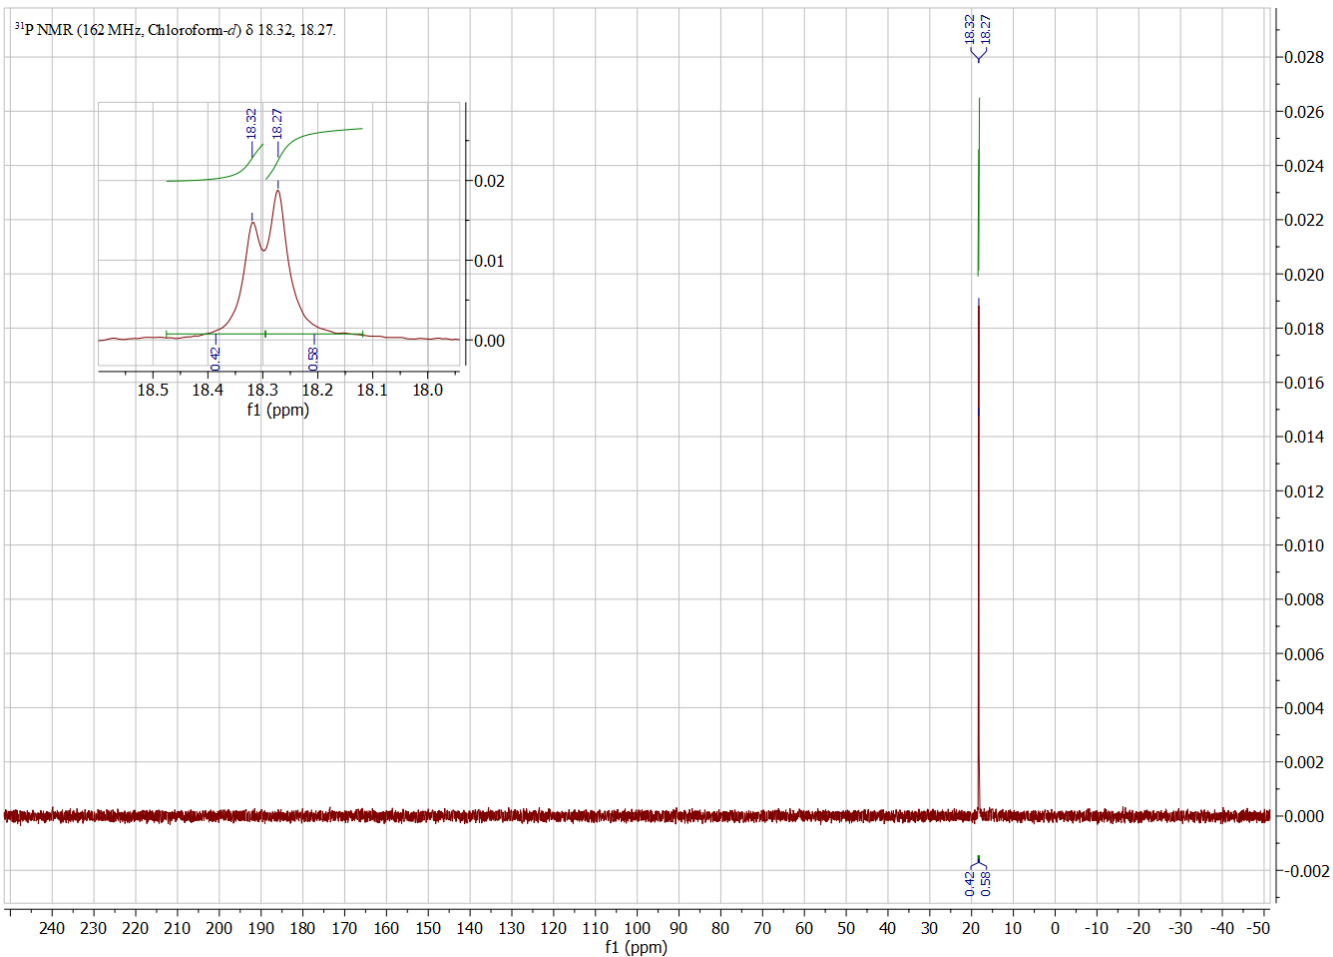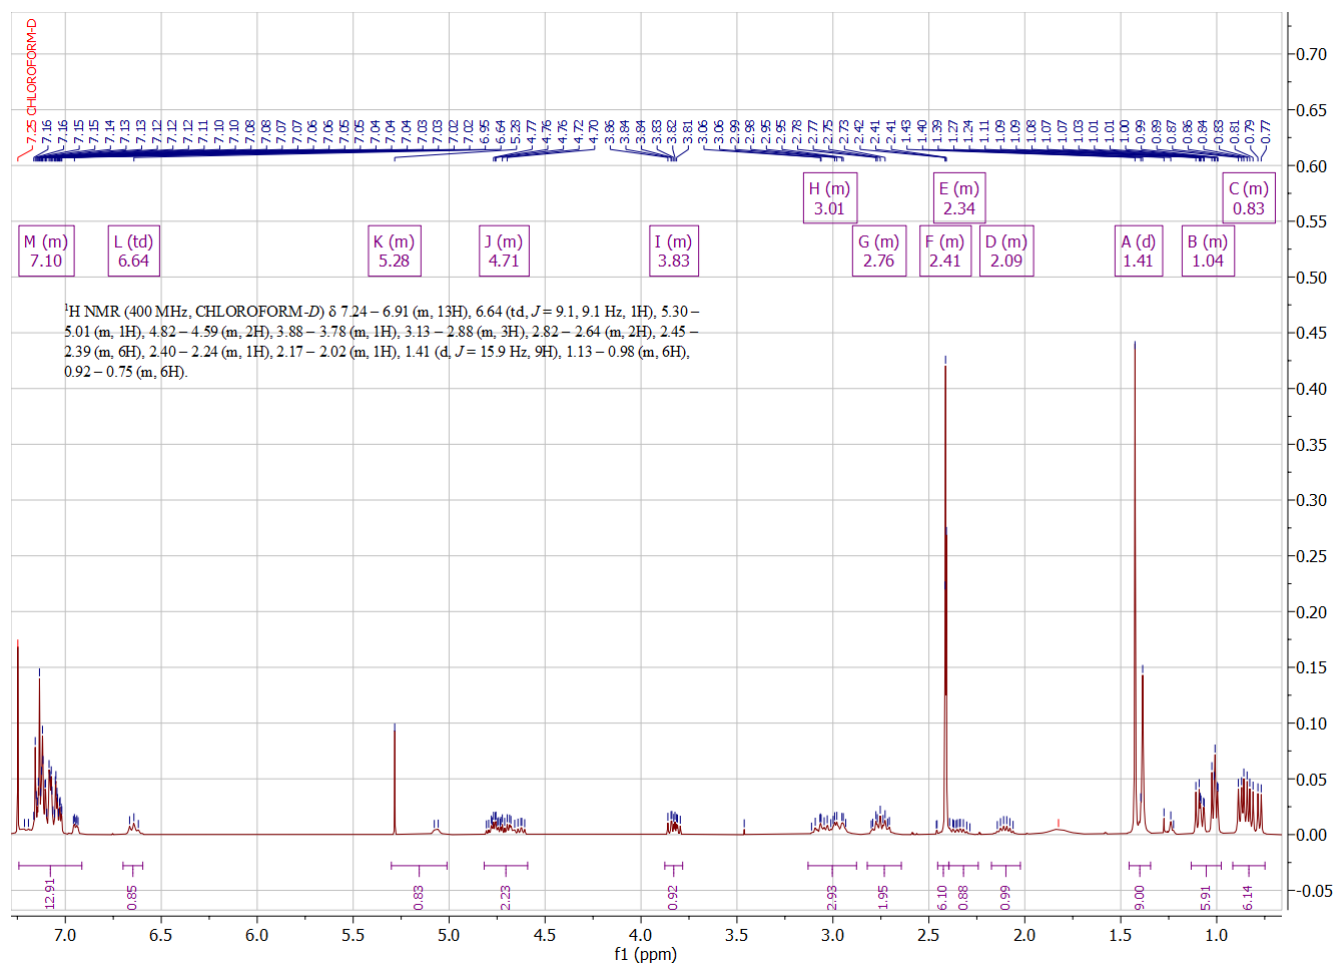

**(42) Boc-L-Val-D-Igl-Val<sup>P</sup>(OPh-4-SCH<sub>3</sub>)<sub>2</sub>**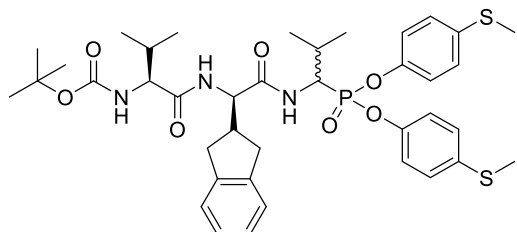

**Name:** *tert*-butyl ((2*S*)-1-(((1*R*)-2-((1-(bis(4-(methylthio)phenoxy)phosphoryl)-2-methylpropyl)amino)-1-(2,3-dihydro-1*H*-inden-2-yl)-2-oxoethyl)amino)-3-methyl-1-oxobutan-2-yl)carbamate

<sup>31</sup>P NMR 162 MHz, Chloroform-*d*) δ 18.41 (s, 60%), 18.14 (s, 40%).

<sup>1</sup>H NMR (400 MHz, Chloroform-*d*) δ 7.25 – 7.00 (m, 13H, 12xArH, NH), 6.81 (dd, *J* = 122.2, 6.1 Hz, 1H, NH), 5.09 (dd, *J* = 97.1, 6.7 Hz, 1H, NH), 4.79 – 4.67 (m, 1H, CHP), 4.65 – 4.55 (m, 1H, CH), 3.95 – 3.80 (m, 1H, CH), 3.14 – 2.83 (m, 3H, CH<sub>2</sub>, CH), 2.83 – 2.63 (m, 2H, CH<sub>2</sub>), 2.47 – 2.40 (m, 6H, 2xSCH<sub>3</sub>), 2.40 – 2.22 (m, 1H, CH), 2.16 – 1.96 (m, 1H, CH), 1.38 (d, *J* = 15.3 Hz, 9H, Boc), 1.11 – 0.95 (m, 6H, 2xCH<sub>3</sub>), 0.92 – 0.70 (m, 6H, 2xCH<sub>3</sub>).

**HRMS:** C<sub>39</sub>H<sub>52</sub>N<sub>3</sub>O<sub>7</sub>PS<sub>2</sub> [M+Na]<sup>+</sup> calc. 792.2882 found 792.2873

**HPLC:** purity >98%; retention time 19.963 and 20.223 min

**Chromatogram**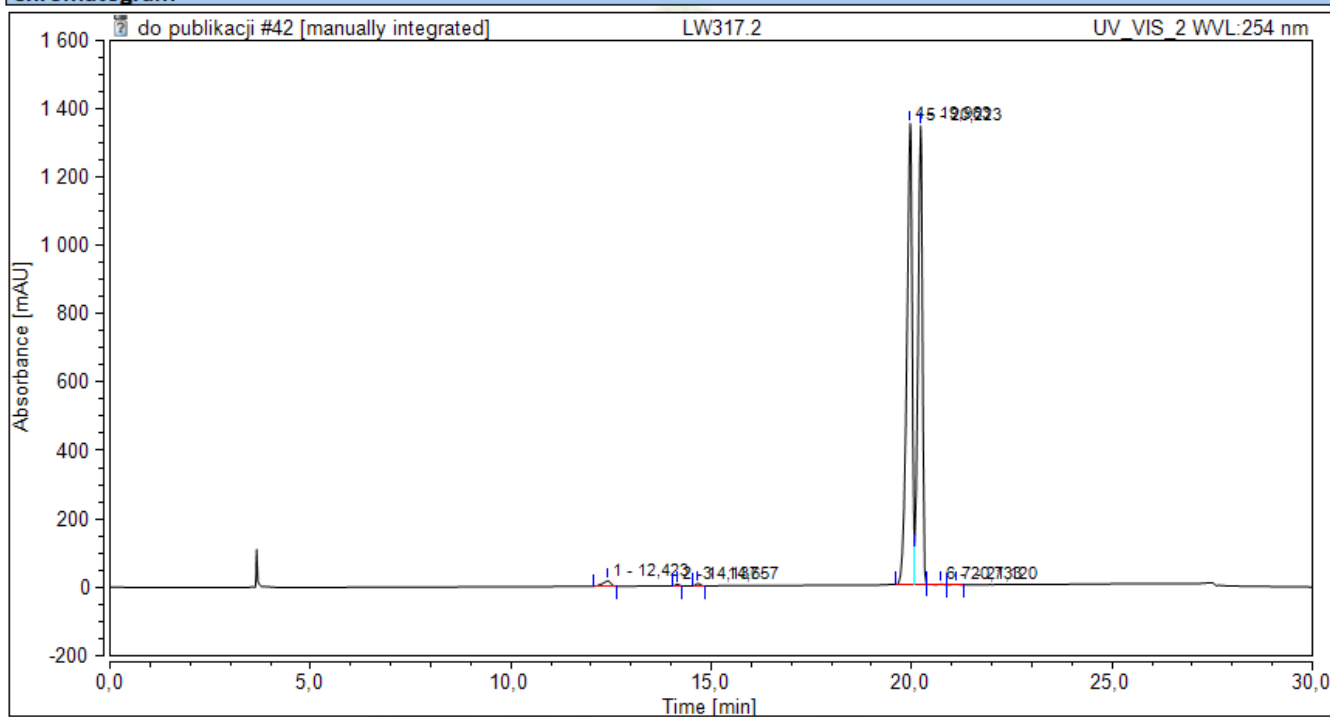**Integration Results**

| No.           | Peak Name | Retention Time<br>min | Area<br>mAU*min | Height<br>mAU   | Relative Area<br>% | Relative Height<br>% | Amount<br>n.a. |
|---------------|-----------|-----------------------|-----------------|-----------------|--------------------|----------------------|----------------|
| 1             |           | 12.423                | 3.662           | 16.318          | 0.95               | 0.60                 | n.a.           |
| 2             |           | 14.137                | 0.520           | 4.604           | 0.14               | 0.17                 | n.a.           |
| 3             |           | 14.657                | 0.907           | 6.915           | 0.24               | 0.25                 | n.a.           |
| 4             |           | 19.963                | 206.125         | 1350.546        | 53.74              | 49.58                | n.a.           |
| 5             |           | 20.223                | 171.893         | 1343.027        | 44.82              | 49.30                | n.a.           |
| 6             |           | 20.733                | 0.273           | 1.536           | 0.07               | 0.06                 | n.a.           |
| 7             |           | 21.120                | 0.182           | 1.140           | 0.05               | 0.04                 | n.a.           |
| <b>Total:</b> |           |                       | <b>383,560</b>  | <b>2724,086</b> | <b>100,00</b>      | <b>100,00</b>        |                |

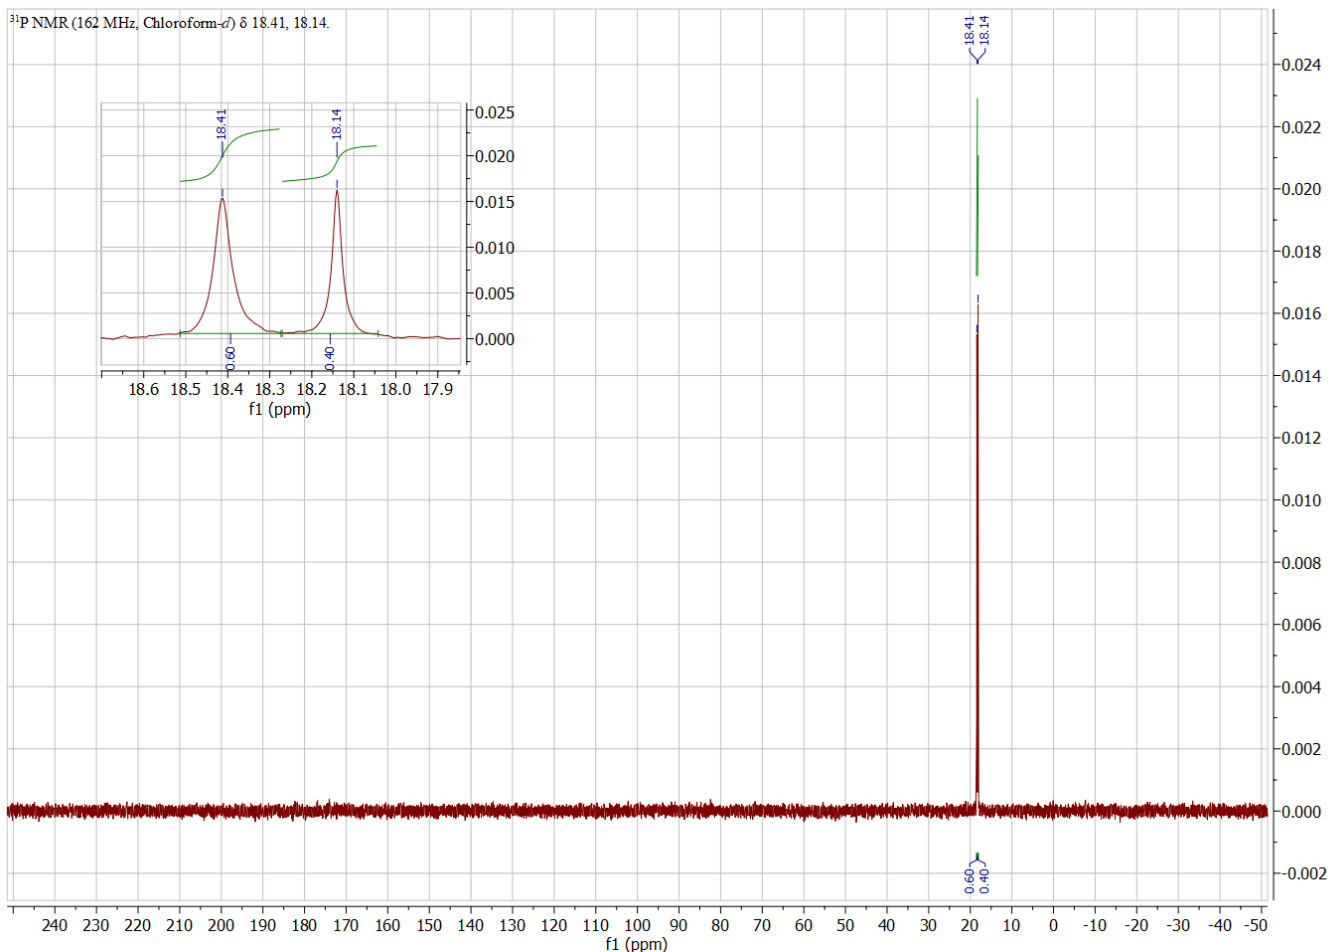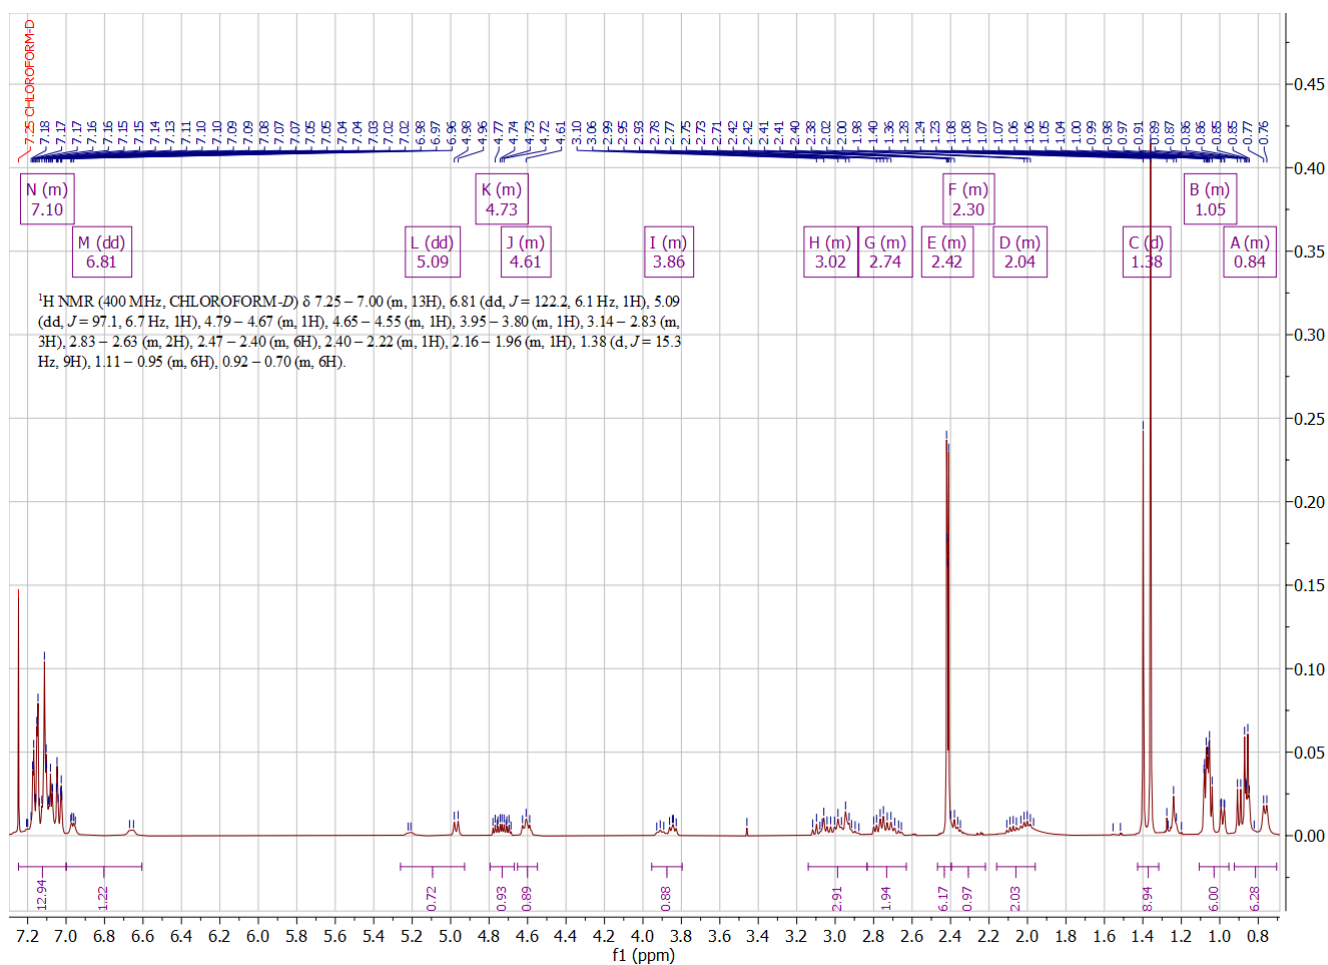

**(43) Boc-L-Val-L-Trp- Val<sup>P</sup>(OPh-4-SCH<sub>3</sub>)<sub>2</sub>**

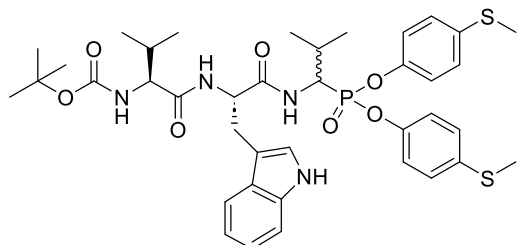

**Name:** *tert*-butyl ((2S)-1-(((2S)-1-((1-(bis(4-(methylthio)phenoxy)phosphoryl)-2-methylpropyl)amino)-3-(1H-indol-3-yl)-1-oxopropan-2-yl)amino)-3-methyl-1-oxobutan-2-yl)carbamate

<sup>31</sup>P NMR (162 MHz, Chloroform-d) δ 17.96 (s, 48%), 17.74 (s, 52%).

<sup>1</sup>H NMR (400 MHz, Chloroform-d) δ 8.07 (d, J = 33.2 Hz, 1H, NH), 7.71 – 7.59 (m, 1H, NH), 7.35 – 7.26 (m, 1H, NH), 7.23 – 7.09 (m, 6H, 6xArH), 7.09 – 6.68 (m, 7H, 6xArH, CH), 4.95 – 4.77 (m, 2H, CHP, NH), 4.75 – 4.63 (m, 1H, CH), 3.94 – 3.81 (m, 1H, CH), 3.34 – 3.07 (m, 2H, CH<sub>2</sub>), 2.48 – 2.35 (m, 6H, 2xSCH<sub>3</sub>), 2.36 – 2.19 (m, 1H, CH), 2.18 – 1.99 (m, 1H, CH), 1.35 (d, J = 5.8 Hz, 9H, Boc), 0.99 – 0.61 (m, 12H, 4xCH<sub>3</sub>).

**HRMS:** C<sub>39</sub>H<sub>51</sub>N<sub>4</sub>O<sub>7</sub>PS<sub>2</sub> [M+Na]<sup>+</sup> calc. 805.2834 found 805.2843

**HPLC:** purity >99%; retention time 18.993 min

**Chromatogram**

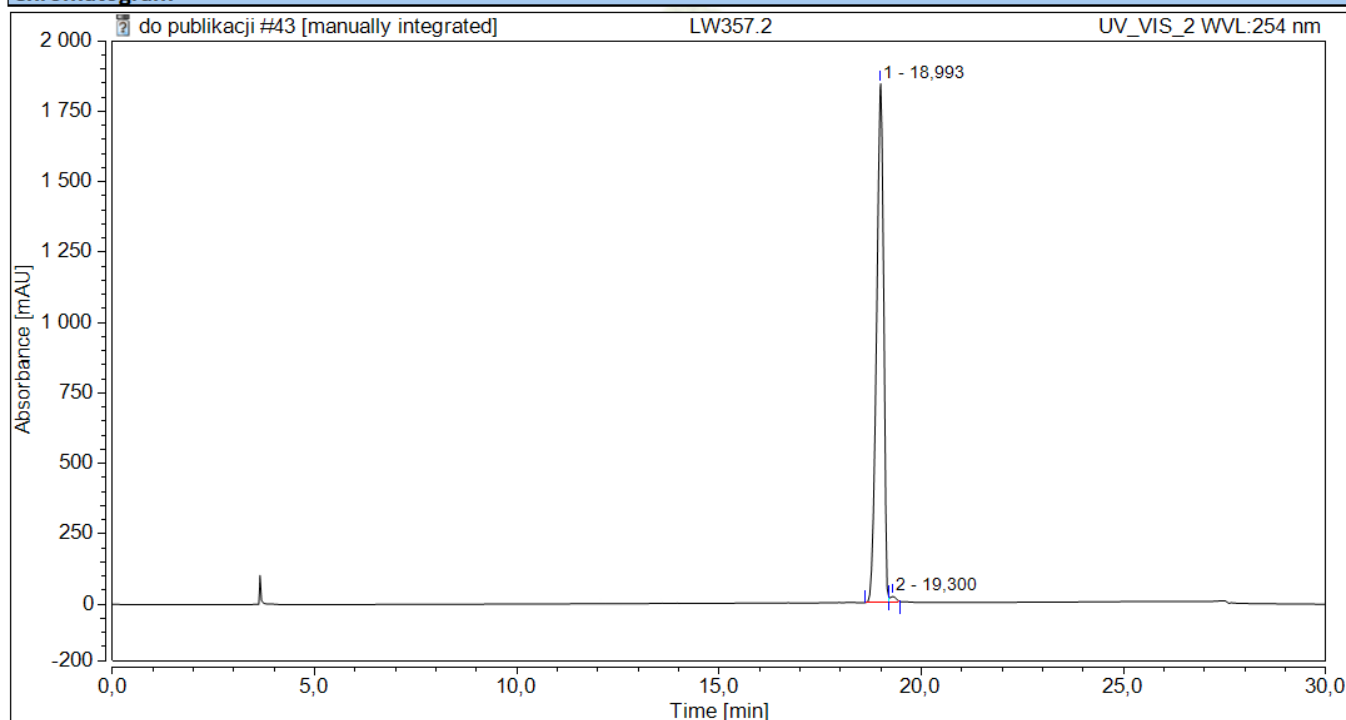

**Integration Results**

| No.           | Peak Name | Retention Time<br>min | Area<br>mAU*min | Height<br>mAU   | Relative Area<br>% | Relative Height<br>% | Amount |
|---------------|-----------|-----------------------|-----------------|-----------------|--------------------|----------------------|--------|
| 1             |           | 18,993                | 372,330         | 1839,923        | 99,15              | 98,97                | n.a.   |
| 2             |           | 19,300                | 3,177           | 19,106          | 0,85               | 1,03                 | n.a.   |
| <b>Total:</b> |           |                       | <b>375,508</b>  | <b>1859,029</b> | <b>100,00</b>      | <b>100,00</b>        |        |



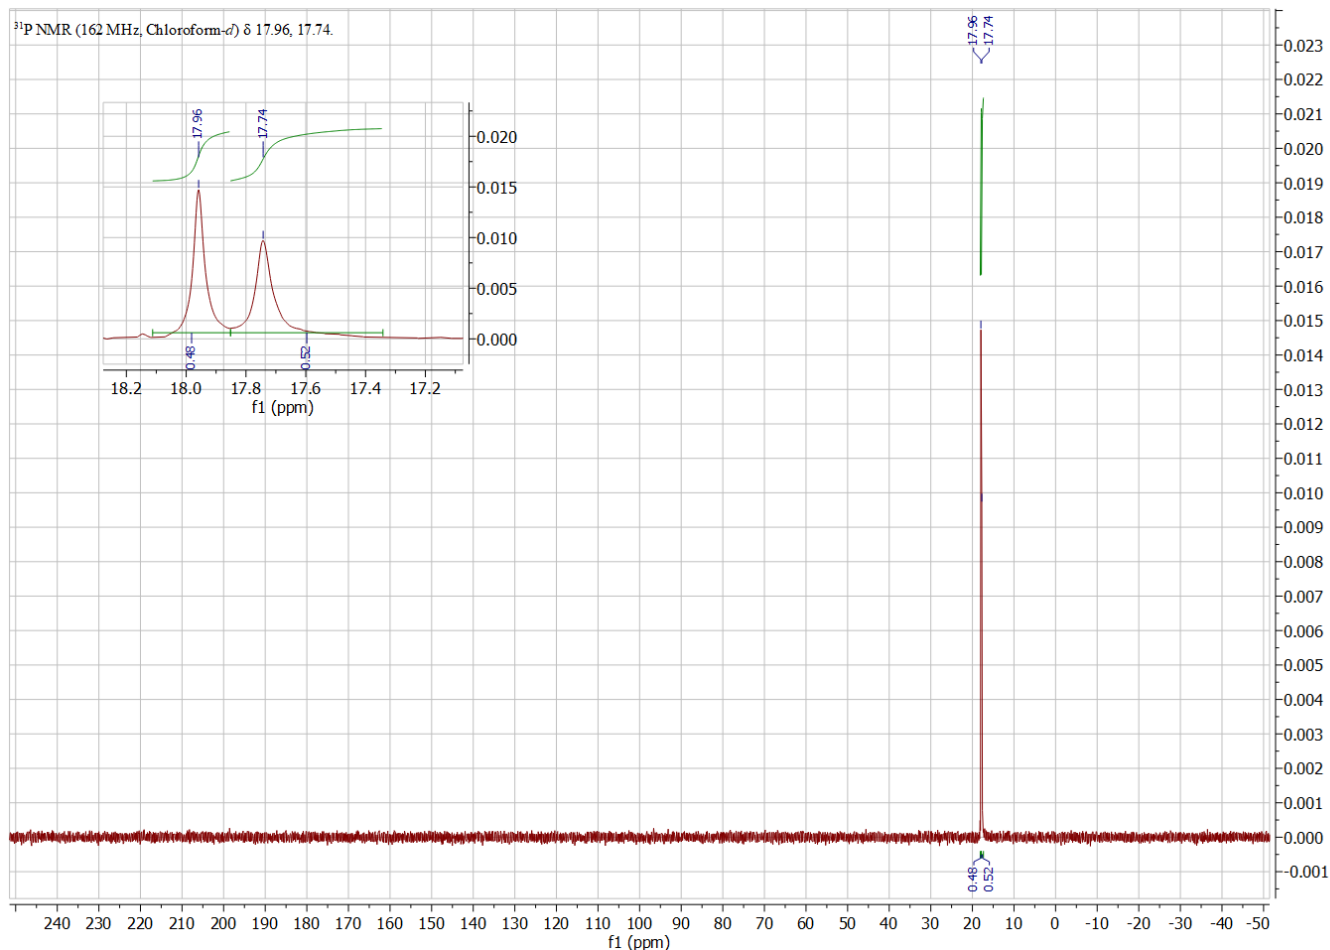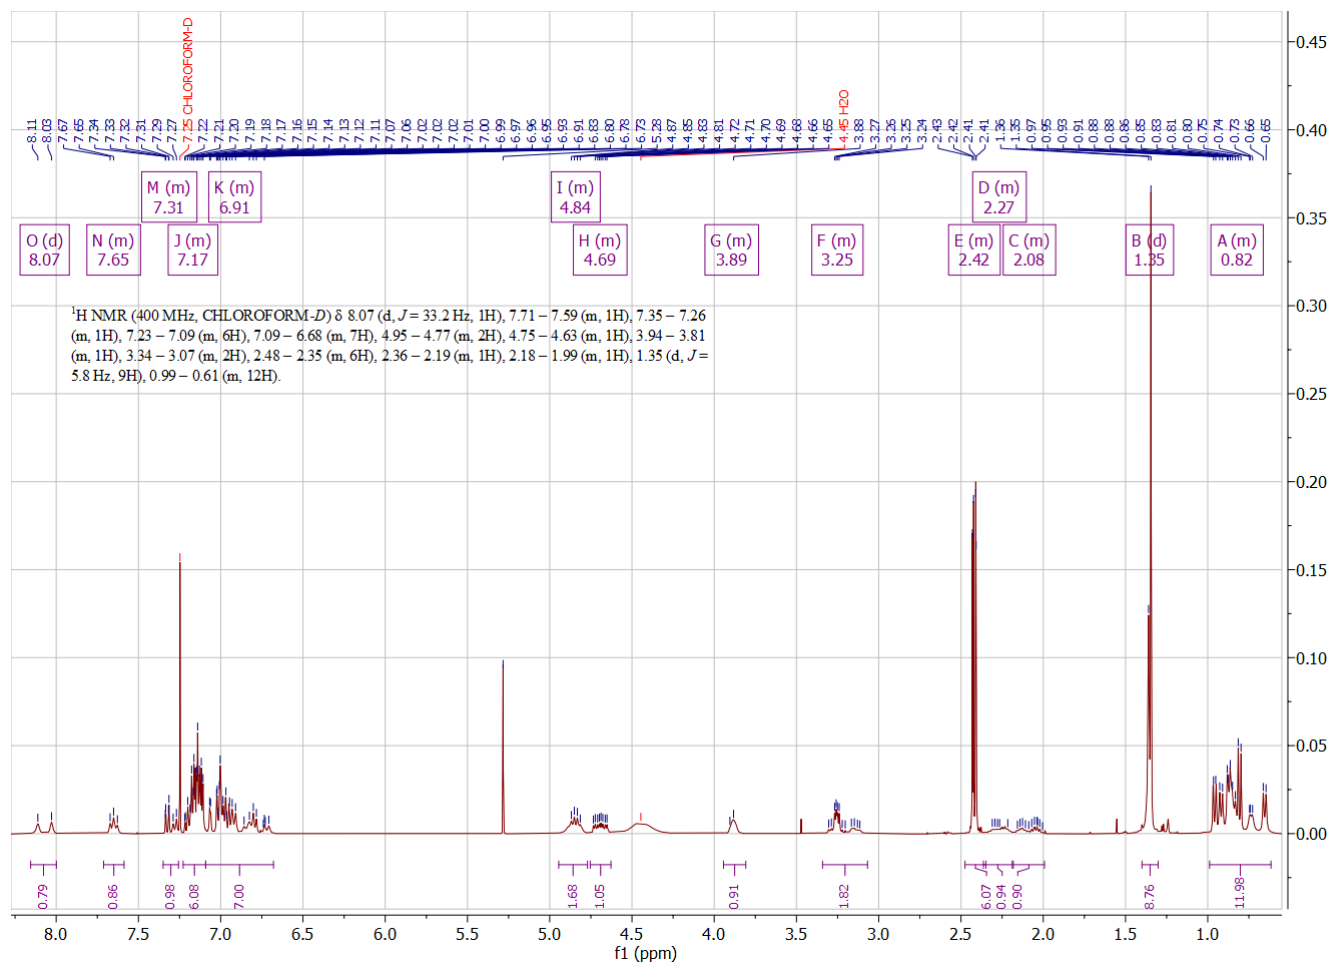

**(44) Boc-L-Val-D-Trp-Val<sup>P</sup>(OPh-4-SCH<sub>3</sub>)<sub>2</sub>**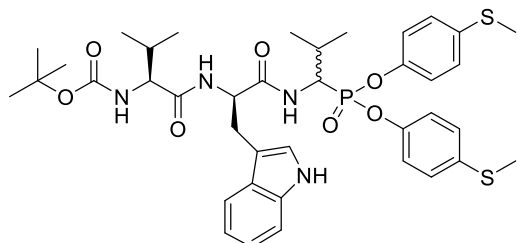

**Name:** *tert*-butyl ((2*S*)-1-(((2*R*)-1-((1-(bis(4-(methylthio)phenoxy)phosphoryl)-2-methylpropyl)amino)-3-(1*H*-indol-3-yl)-1-oxopropan-2-yl)amino)-3-methyl-1-oxobutan-2-yl)carbamate

<sup>31</sup>P NMR (162 MHz, Chloroform-*d*) δ 18.03 (s, 46%), 17.80 (s, 54%).

<sup>1</sup>H NMR (400 MHz, Chloroform-*d*) δ 8.06 (d, *J* = 38.8 Hz, 1H), 7.70 – 7.61 (m, 1H, NH), 7.36 – 7.25 (m, 1H, NH), 7.21 – 7.07 (m, 6H, 6xArH), 7.07 – 6.58 (m, 7H, 6xArH, CH), 5.11 (dd, *J* = 54.0, 8.4 Hz, 1H, NH), 4.95 – 4.81 (m, 1H, CH), 4.77 – 4.63 (m, 1H, CHP), 3.89 – 3.71 (m, 1H, CH), 3.33 – 3.06 (m, 2H, CH<sub>2</sub>), 2.41 (dd, *J* = 10.6, 2.7 Hz, 6H, 2xSCH<sub>3</sub>), 2.38 – 2.17 (m, 1H, CH), 2.01 – 1.78 (m, 1H, CH), 1.37 (d, *J* = 8.2 Hz, 9H, Boc), 1.01 – 0.63 (m, 12H, 4xCH<sub>3</sub>).

**HRMS:** C<sub>39</sub>H<sub>51</sub>N<sub>4</sub>O<sub>7</sub>PS<sub>2</sub> [M+Na]<sup>+</sup> calc. 805.2834 found 805.2846

**HPLC:** purity >99%; retention time 18.973 and 19.133 min

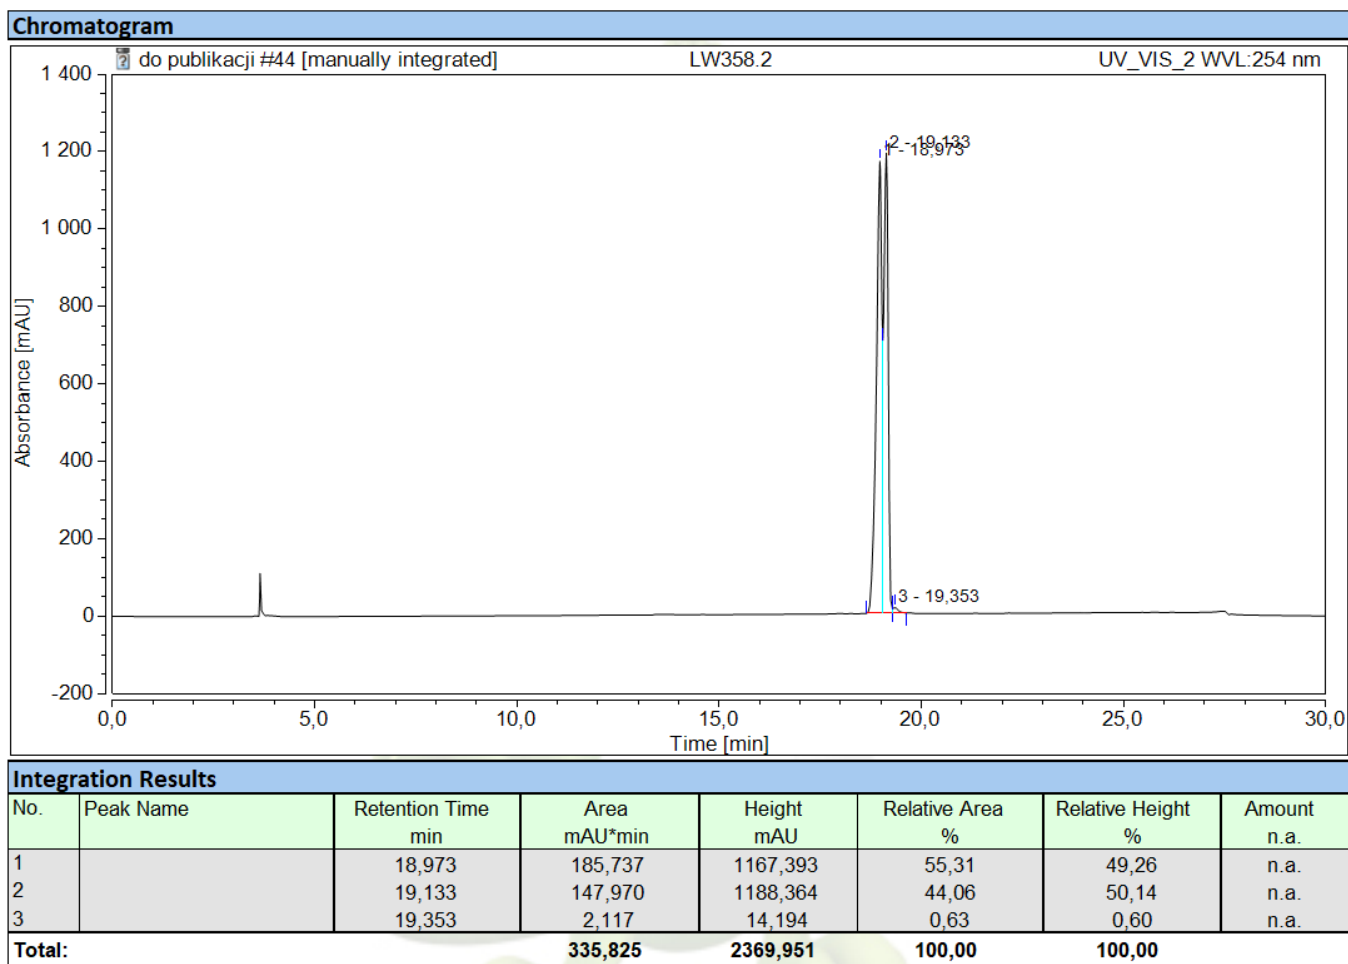

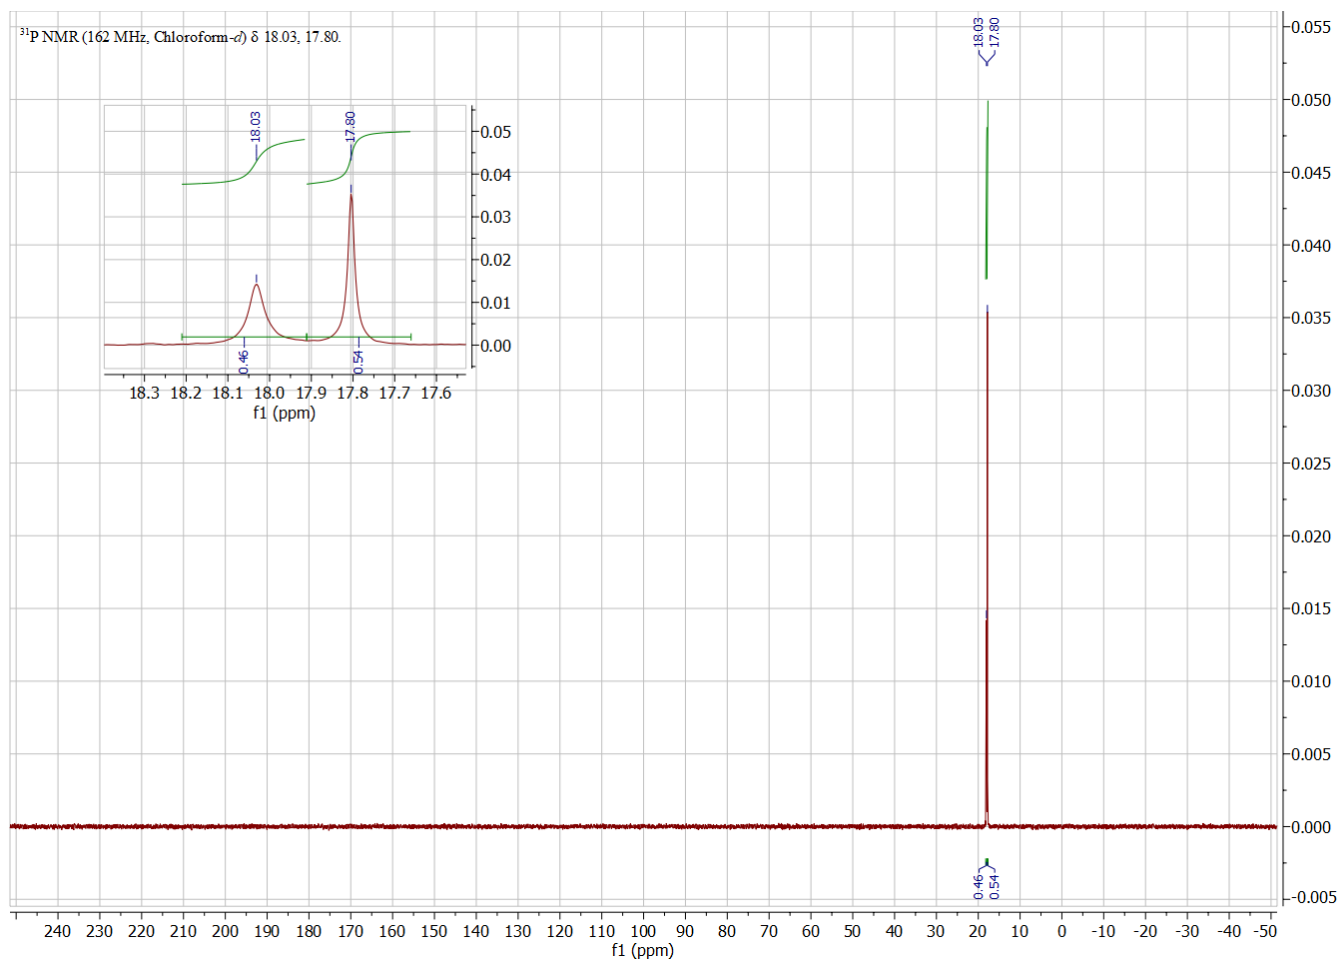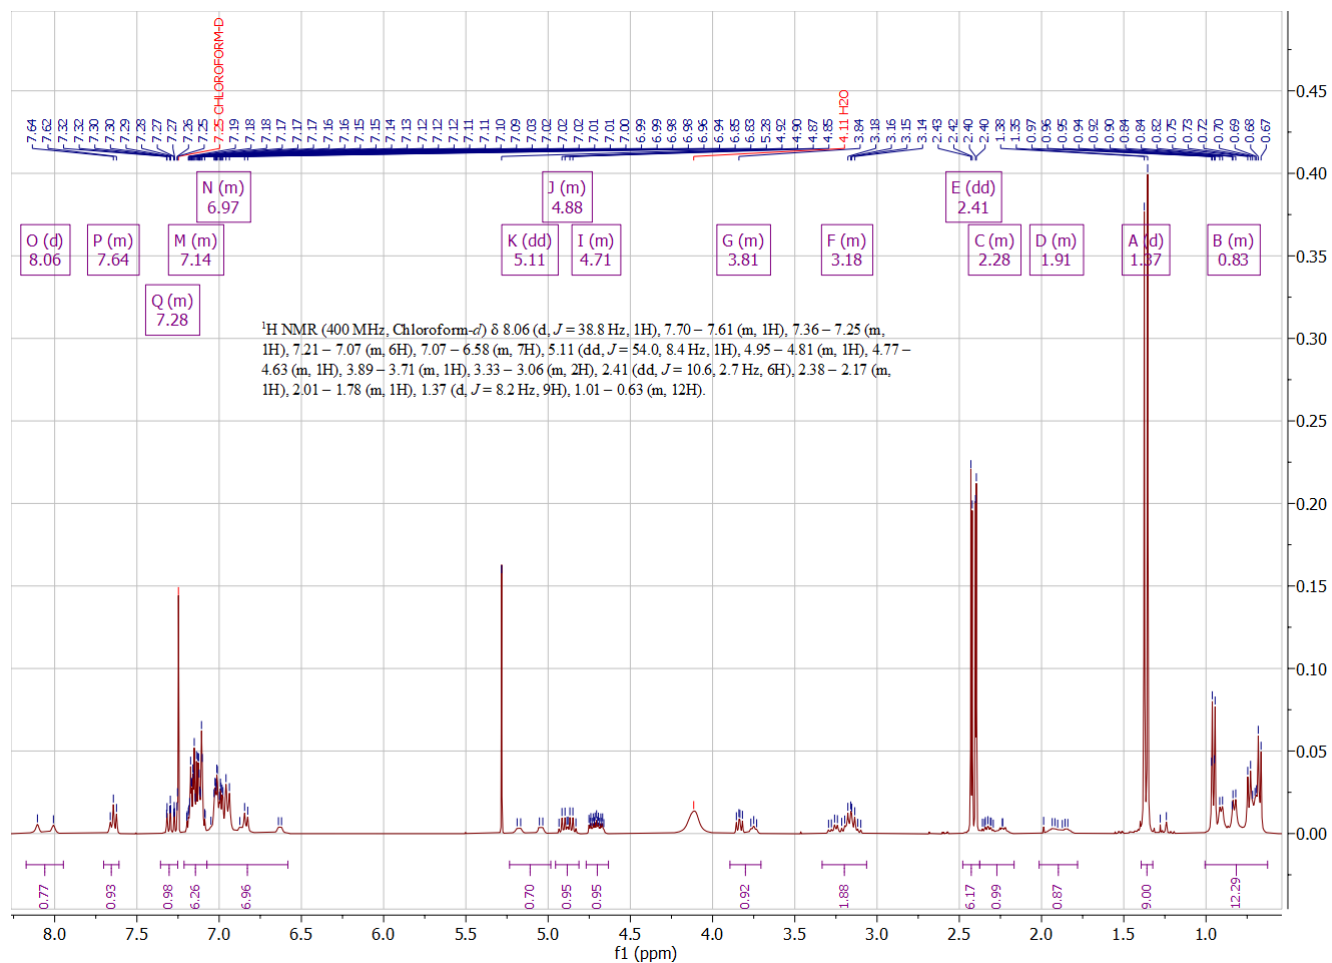

**(45) Boc-L-Val-L-Asp(Bzl)-Val<sup>P</sup>(OPh-4-SCH<sub>3</sub>)<sub>2</sub>**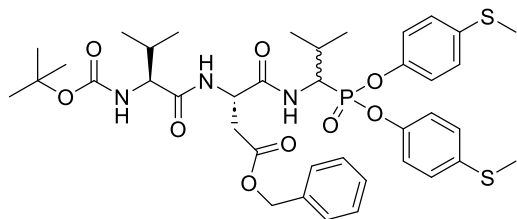

**Name:** benzyl (3S)-4-((1-(bis(4-(methylthio)phenoxy)phosphoryl)-2-methylpropyl)amino)-3-((S)-2-((tert-butoxycarbonyl)amino)-3-methylbutanamido)-4-oxobutanoate

**<sup>31</sup>P NMR** (162 MHz, Chloroform-d) δ 18.03 (s, 50%), 17.99 (s, 50%).

**<sup>1</sup>H NMR** (400 MHz, Chloroform-d) δ 7.36 – 7.25 (m, 6H, 5xArH, NH), 7.24 – 7.10 (m, 7H, 6xArH, NH), 7.07 – 7.00 (m, 2H, 2xArH), 5.15 – 5.02 (m, 2H, CH<sub>2</sub>), 4.99 – 4.92 (m, 1H, NH), 4.89 – 4.79 (m, 1H, CH), 4.72 – 4.59 (m, 1H, CHP), 3.99 – 3.88 (m, 1H, CH), 3.10 – 2.98 (m, 1H, 0.5xCH<sub>2</sub>), 2.78 – 2.59 (m, 1H, 0.5xCH<sub>2</sub>), 2.44 – 2.40 (m, 6H, 2xSCH<sub>3</sub>), 2.40 – 2.31 (m, 1H, CH), 2.22 – 2.04 (m, 1H, CH), 1.41 (d, J = 12.9 Hz, 9H, Boc), 1.10 – 0.97 (m, 6H, 2xCH<sub>3</sub>), 0.96 – 0.81 (m, 6H, 2xCH<sub>3</sub>).

**HRMS:** C<sub>39</sub>H<sub>52</sub>N<sub>3</sub>O<sub>9</sub>PS<sub>2</sub> [M+Na]<sup>+</sup> calc. 824.2780 found 824.2771

**HPLC:** purity >98%; retention time 19.943 min

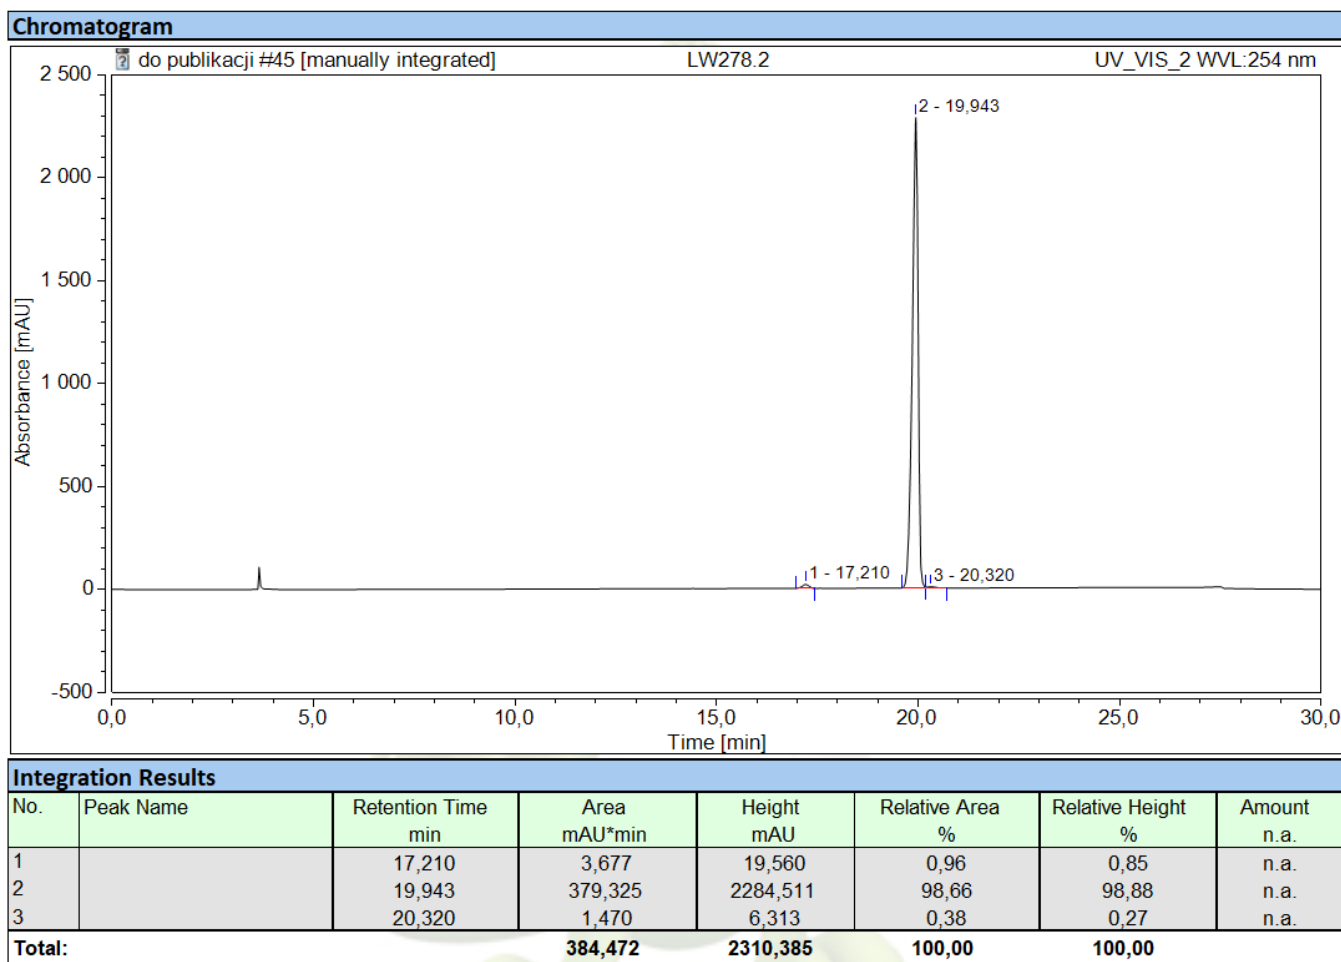

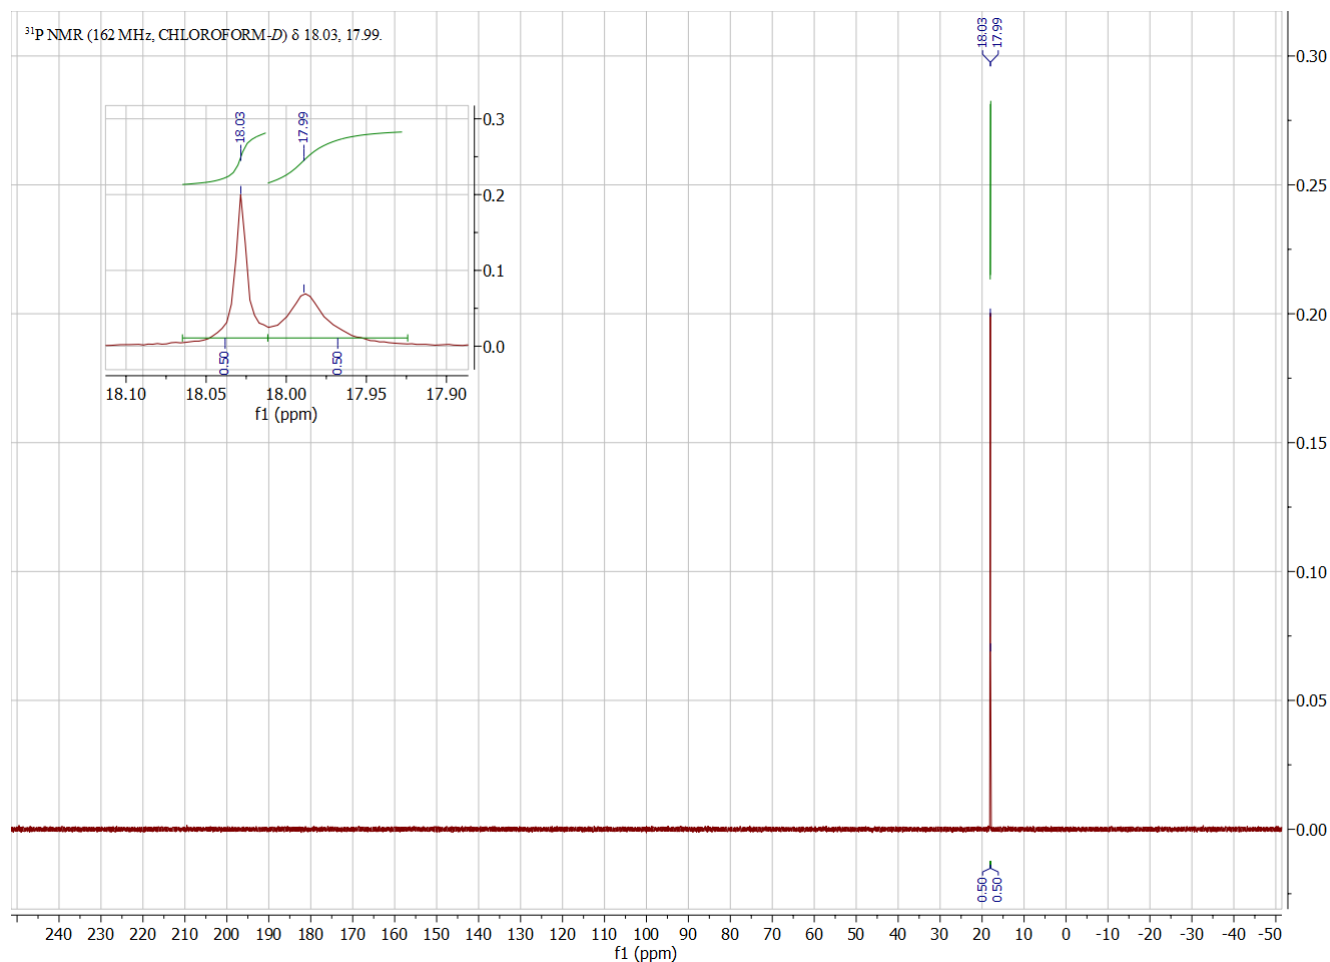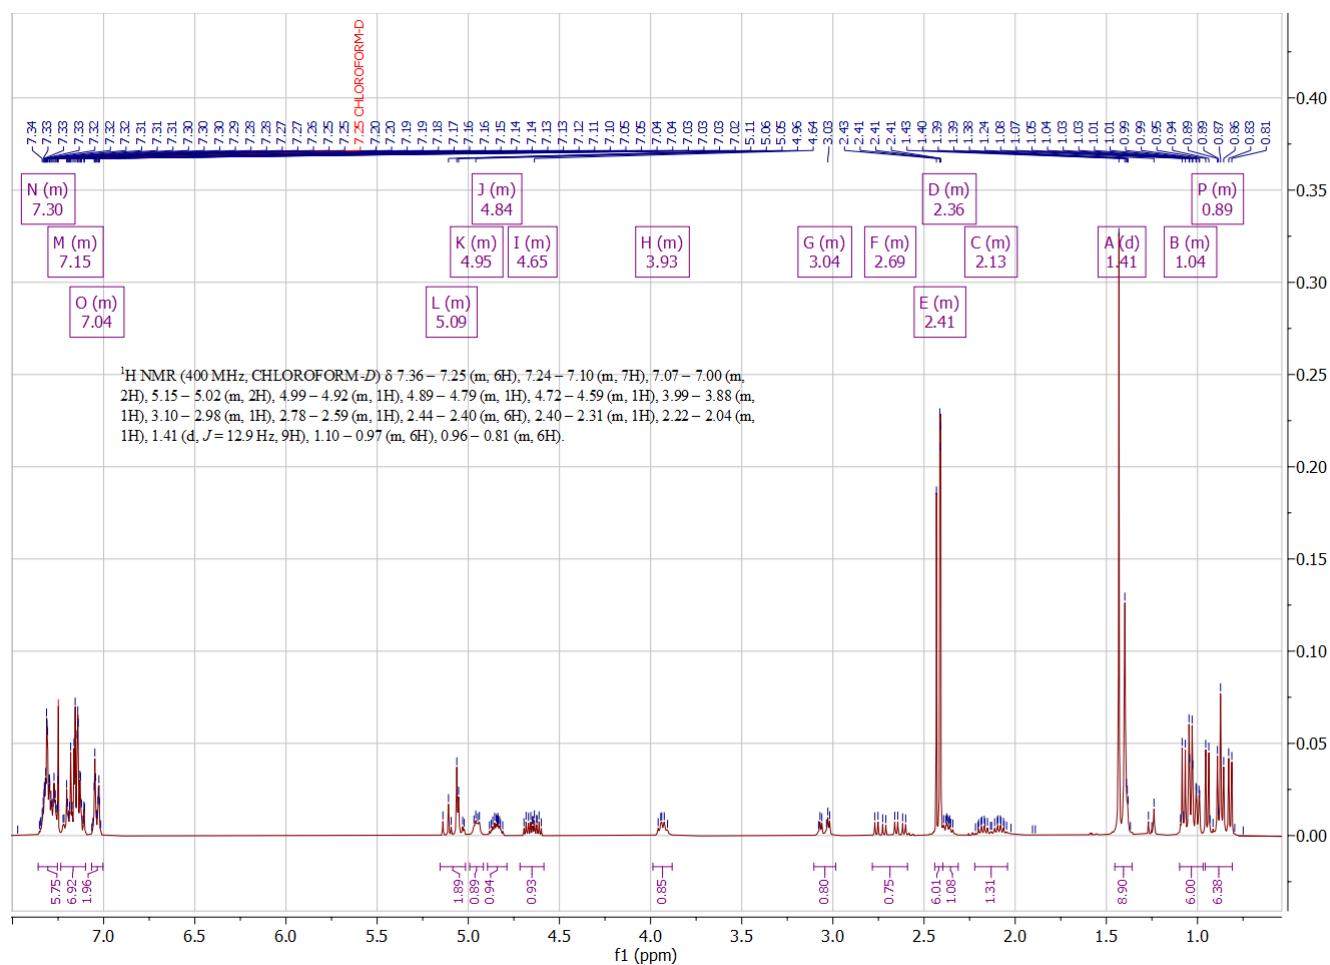

**(46) Boc-L-Val-D-Asp(Bzl)-Val<sup>P</sup>(OPh-4-SCH<sub>3</sub>)<sub>2</sub>**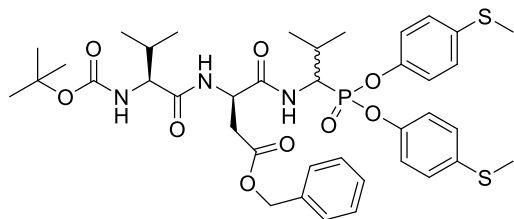

**Name:** benzyl (3R)-4-((1-(bis(4-(methylthio)phenoxy)phosphoryl)-2-methylpropyl)amino)-3-((S)-2-((tert-butoxycarbonyl)amino)-3-methylbutanamido)-4-oxobutanoate

**<sup>31</sup>P NMR** (162 MHz, Chloroform-d) δ 18.14 (s, 54%), 17.96 (s, 46%).

**<sup>1</sup>H NMR** (400 MHz, Chloroform-d) δ 7.36 – 7.25 (m, 6H, 5xArH, NH), 7.24 – 7.10 (m, 7H, 6xArH, NH), 7.09 – 6.99 (m, 2H, 2xArH), 5.12 – 4.80 (m, 4H, CH<sub>2</sub>, NH, CH), 4.70 – 4.58 (m, 1H, CHP), 3.92 – 3.77 (m, 1H, CH), 3.11 – 2.94 (m, 1H, 0.5xCH<sub>2</sub>), 2.75 – 2.56 (m, 1H, 0.5xCH<sub>2</sub>), 2.46 – 2.30 (m, 7H, 2xSCH<sub>3</sub>, CH), 2.15 – 2.00 (m, 1H, CH), 1.38 (d, J = 1.8 Hz, 9H, Boc), 1.12 – 0.95 (m, 6H, 2xCH<sub>3</sub>), 0.93 – 0.81 (m, 6H, 2xCH<sub>3</sub>).

**HRMS:** C<sub>39</sub>H<sub>52</sub>N<sub>3</sub>O<sub>9</sub>PS<sub>2</sub> [M+Na]<sup>+</sup> calc. 824.2780 found 824.2800

**HPLC:** purity >98%; retention time 19.940 and 20.073 min

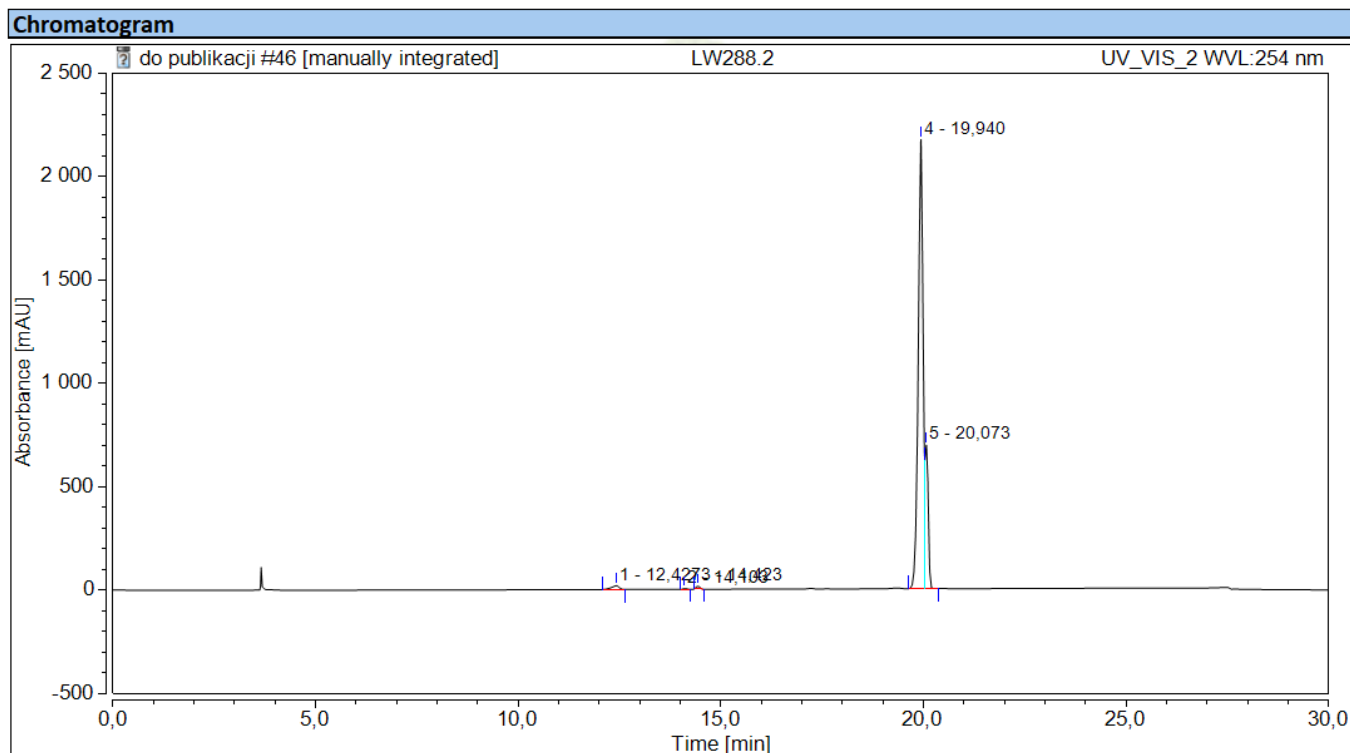

| Integration Results |           |                       |                 |                 |                    |                      |                |
|---------------------|-----------|-----------------------|-----------------|-----------------|--------------------|----------------------|----------------|
| No.                 | Peak Name | Retention Time<br>min | Area<br>mAU*min | Height<br>mAU   | Relative Area<br>% | Relative Height<br>% | Amount<br>n.a. |
| 1                   |           | 12,427                | 4,162           | 19,201          | 1,14               | 0,66                 | n.a.           |
| 2                   |           | 14,103                | 0,379           | 3,490           | 0,10               | 0,12                 | n.a.           |
| 3                   |           | 14,423                | 1,608           | 14,055          | 0,44               | 0,48                 | n.a.           |
| 4                   |           | 19,940                | 298,778         | 2170,841        | 81,85              | 74,83                | n.a.           |
| 5                   |           | 20,073                | 60,102          | 693,562         | 16,47              | 23,91                | n.a.           |
| <b>Total:</b>       |           |                       | <b>365,030</b>  | <b>2901,149</b> | <b>100,00</b>      | <b>100,00</b>        |                |

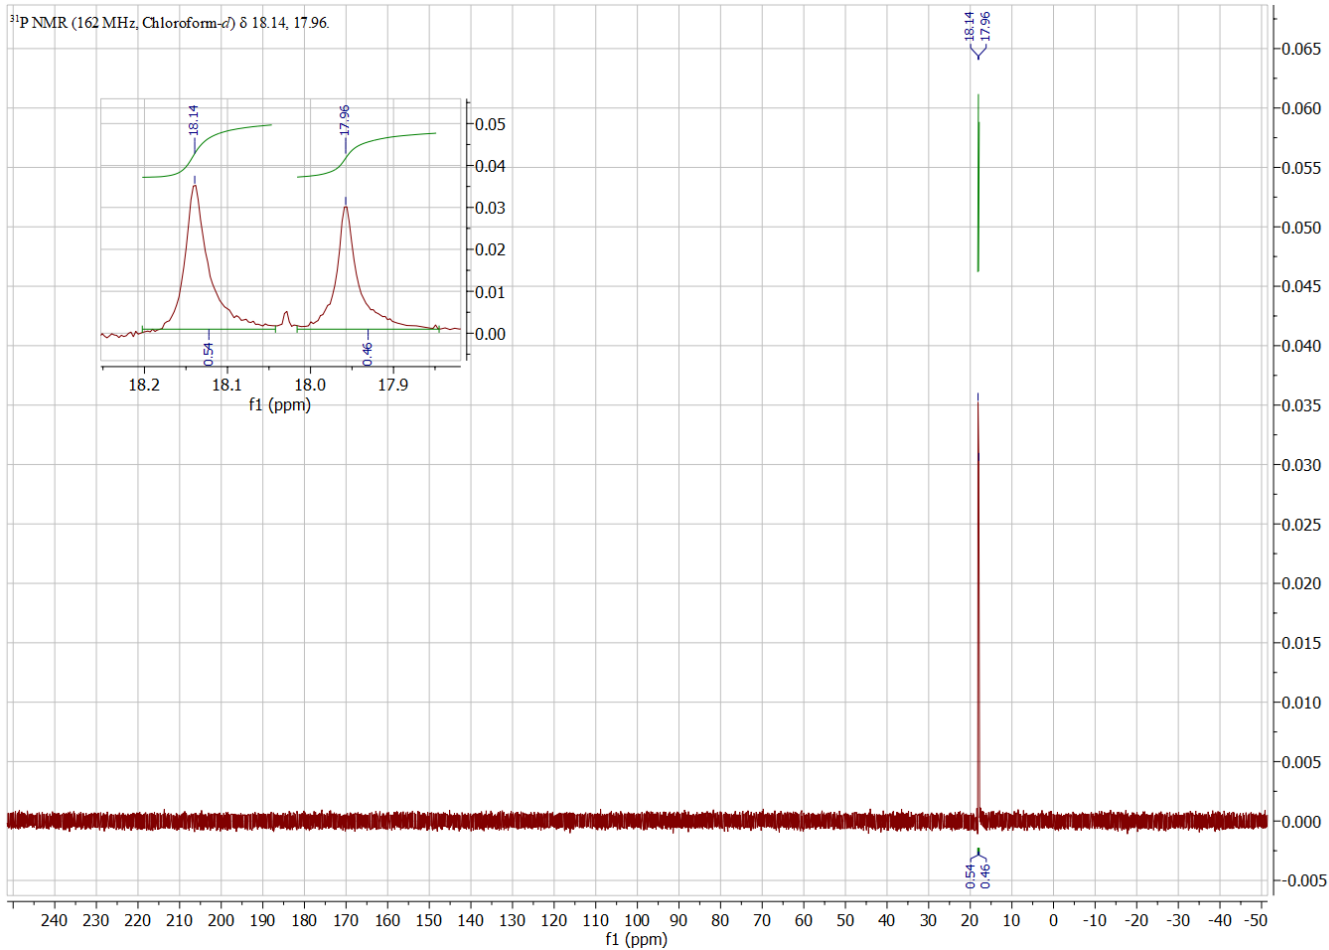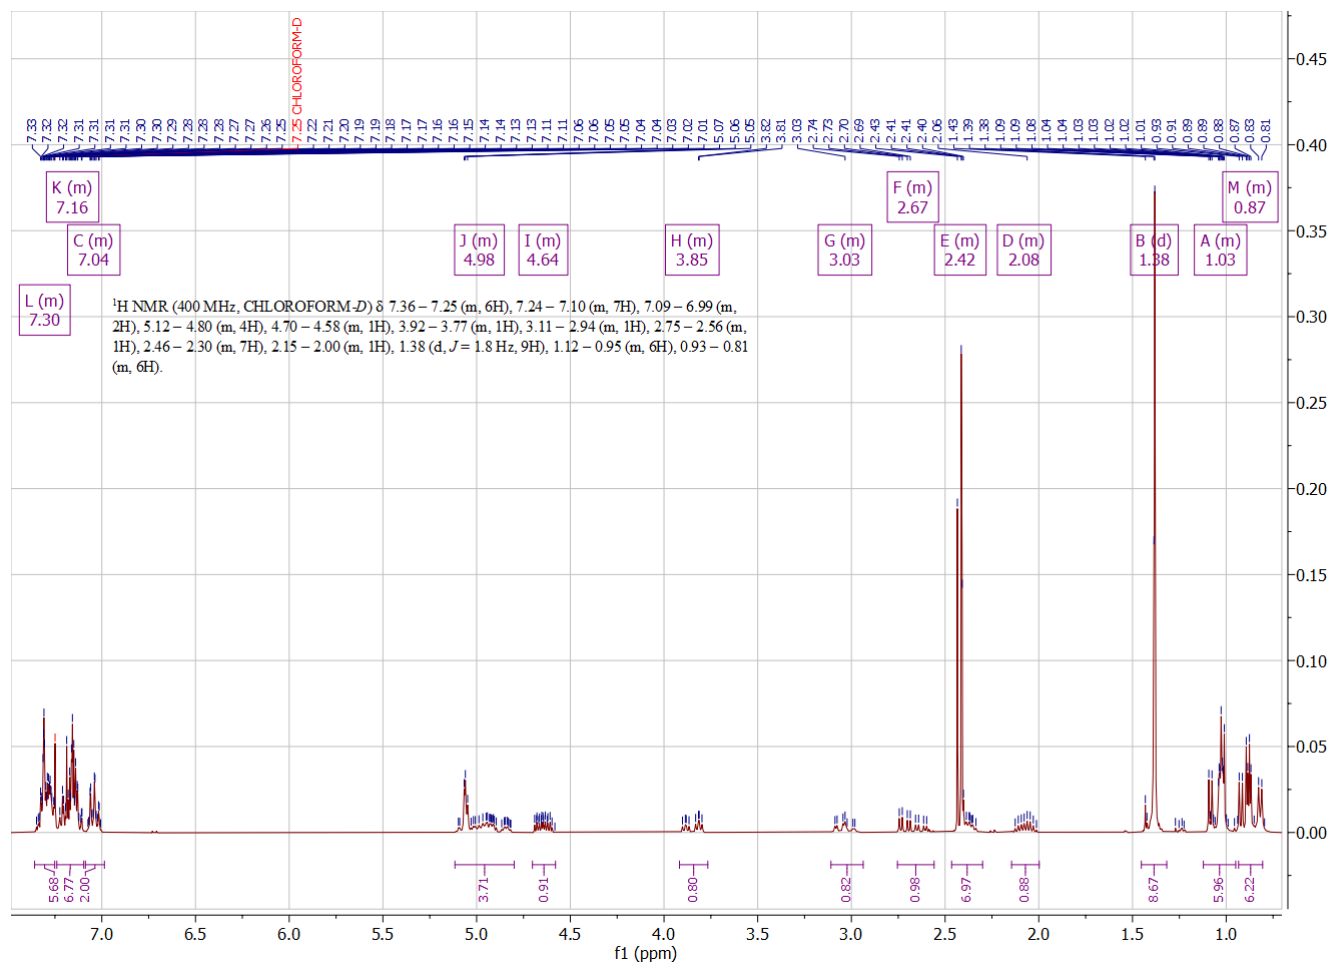

**(47) Boc-L-Val-L-Cys(Bzl)-Val<sup>P</sup>(OPh-4-SCH<sub>3</sub>)<sub>2</sub>**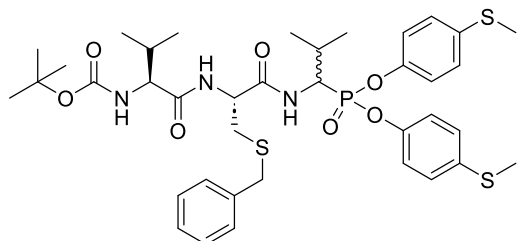

**Name:** *tert*-butyl ((2*S*)-1-(((2*R*)-3-(benzylthio)-1-((1-(bis(4-(methylthio)phenoxy)phosphoryl)-2-methylpropyl)amino)-1-oxopropan-2-yl)amino)-3-methyl-1-oxobutan-2-yl)carbamate

<sup>31</sup>P NMR (162 MHz, Chloroform-*d*) δ 17.89 (s).

<sup>1</sup>H NMR (400 MHz, Chloroform-*d*) δ 7.35 – 7.25 (m, 4H, 4xArH), 7.24 – 7.01 (m, 9H, 9xArH), 6.99 – 6.87 (m, 1H, NH), 6.82 (dd, *J* = 28.6, 6.9 Hz, 1H, NH), 5.07 – 4.82 (m, 1H, NH), 4.76 – 4.61 (m, 1H, CHP), 4.54 – 4.43 (m, 1H, CH), 3.96 – 3.88 (m, 1H, CH), 3.77 (d, *J* = 5.9 Hz, 2H, CH<sub>2</sub>), 2.97 – 2.84 (m, 1H, 0.5xCH<sub>2</sub>), 2.73 – 2.58 (m, 1H, 0.5xCH<sub>2</sub>), 2.43 (dd, *J* = 5.3, 2.1 Hz, 6H, 2xSCH<sub>3</sub>), 2.41 – 2.32 (m, 1H, CH), 2.23 – 2.09 (m, 1H, CH), 1.42 (d, *J* = 11.5 Hz, 9H, Boc), 1.14 – 0.99 (m, 6H, 2xCH<sub>3</sub>), 0.94 (dd, *J* = 7.9, 6.8 Hz, 3H, CH<sub>3</sub>), 0.86 (dd, *J* = 6.9, 3.5 Hz, 3H, CH<sub>3</sub>).

**HRMS:** C<sub>38</sub>H<sub>52</sub>N<sub>3</sub>O<sub>7</sub>PS<sub>3</sub> [M+Na]<sup>+</sup> calc. 812.2603 found 812.2574

**HPLC:** purity >98%; retention time 19.977 and 20.197 min

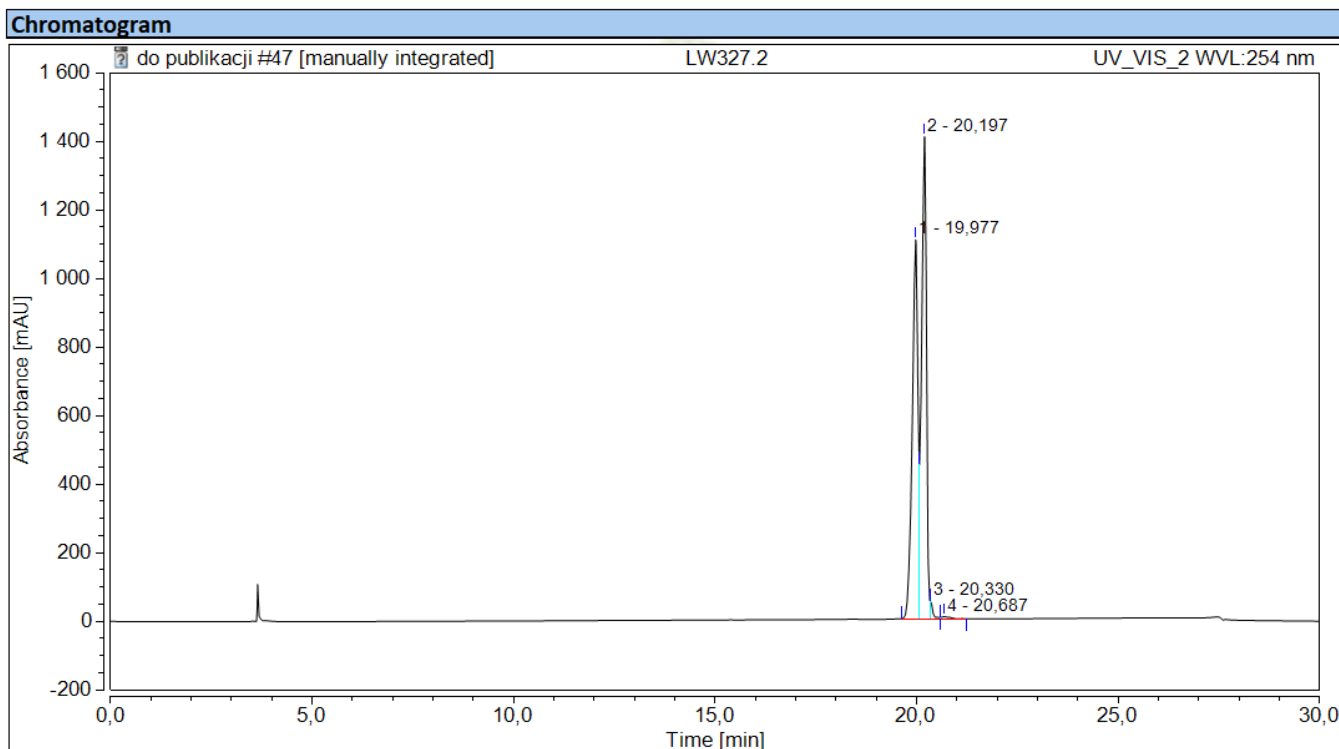

| Integration Results |           |                       |                 |                 |                    |                      |                |
|---------------------|-----------|-----------------------|-----------------|-----------------|--------------------|----------------------|----------------|
| No.                 | Peak Name | Retention Time<br>min | Area<br>mAU*min | Height<br>mAU   | Relative Area<br>% | Relative Height<br>% | Amount<br>n.a. |
| 1                   |           | 19,977                | 178,894         | 1105,174        | 46,95              | 42,99                | n.a.           |
| 2                   |           | 20,197                | 196,546         | 1406,187        | 51,58              | 54,70                | n.a.           |
| 3                   |           | 20,330                | 4,038           | 52,855          | 1,06               | 2,06                 | n.a.           |
| 4                   |           | 20,687                | 1,570           | 6,283           | 0,41               | 0,24                 | n.a.           |
| <b>Total:</b>       |           |                       | <b>381,048</b>  | <b>2570,498</b> | <b>100,00</b>      | <b>100,00</b>        |                |



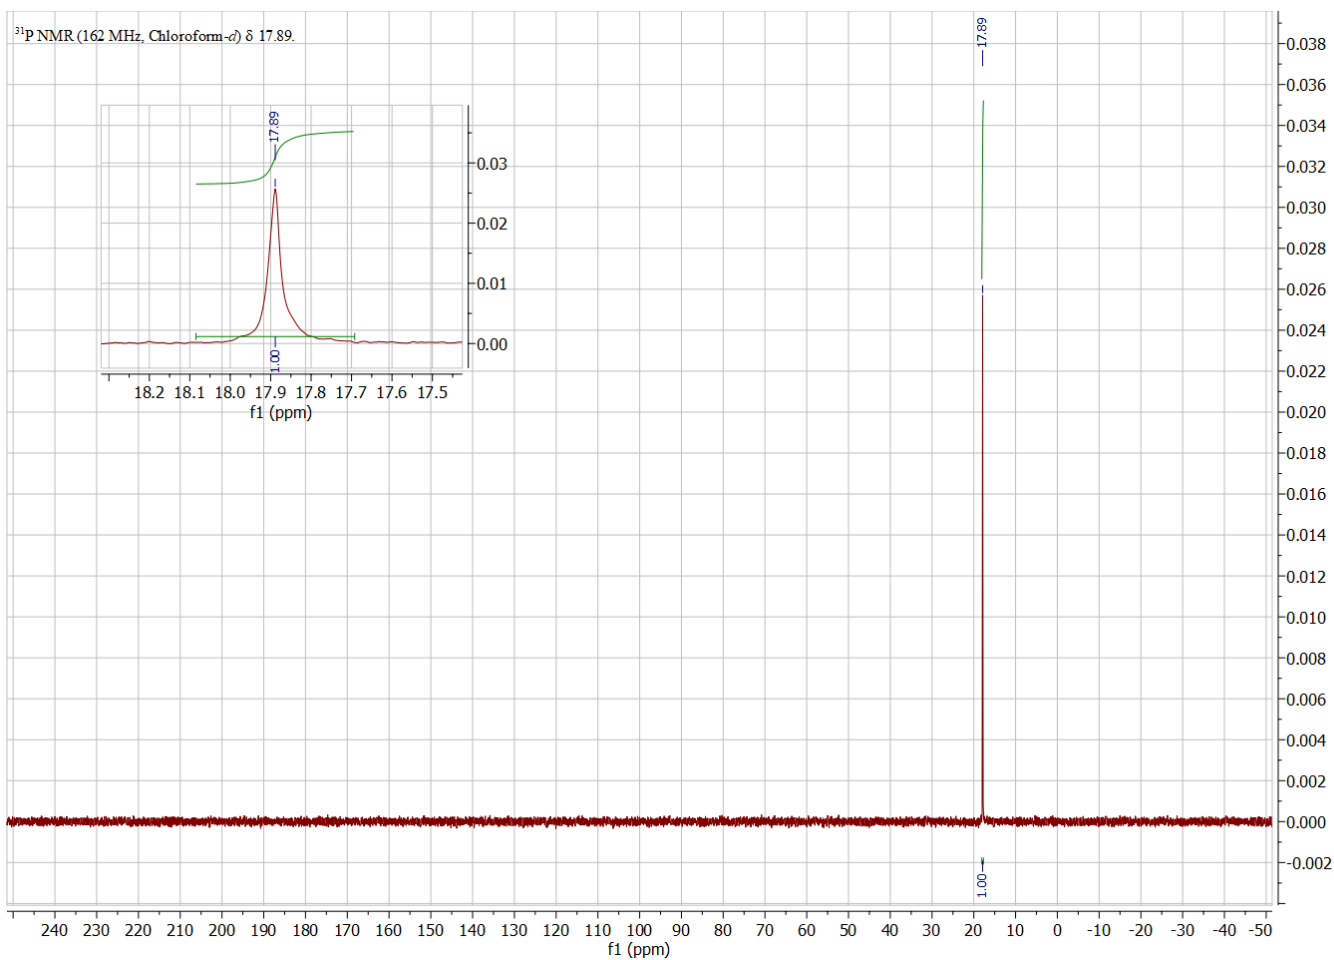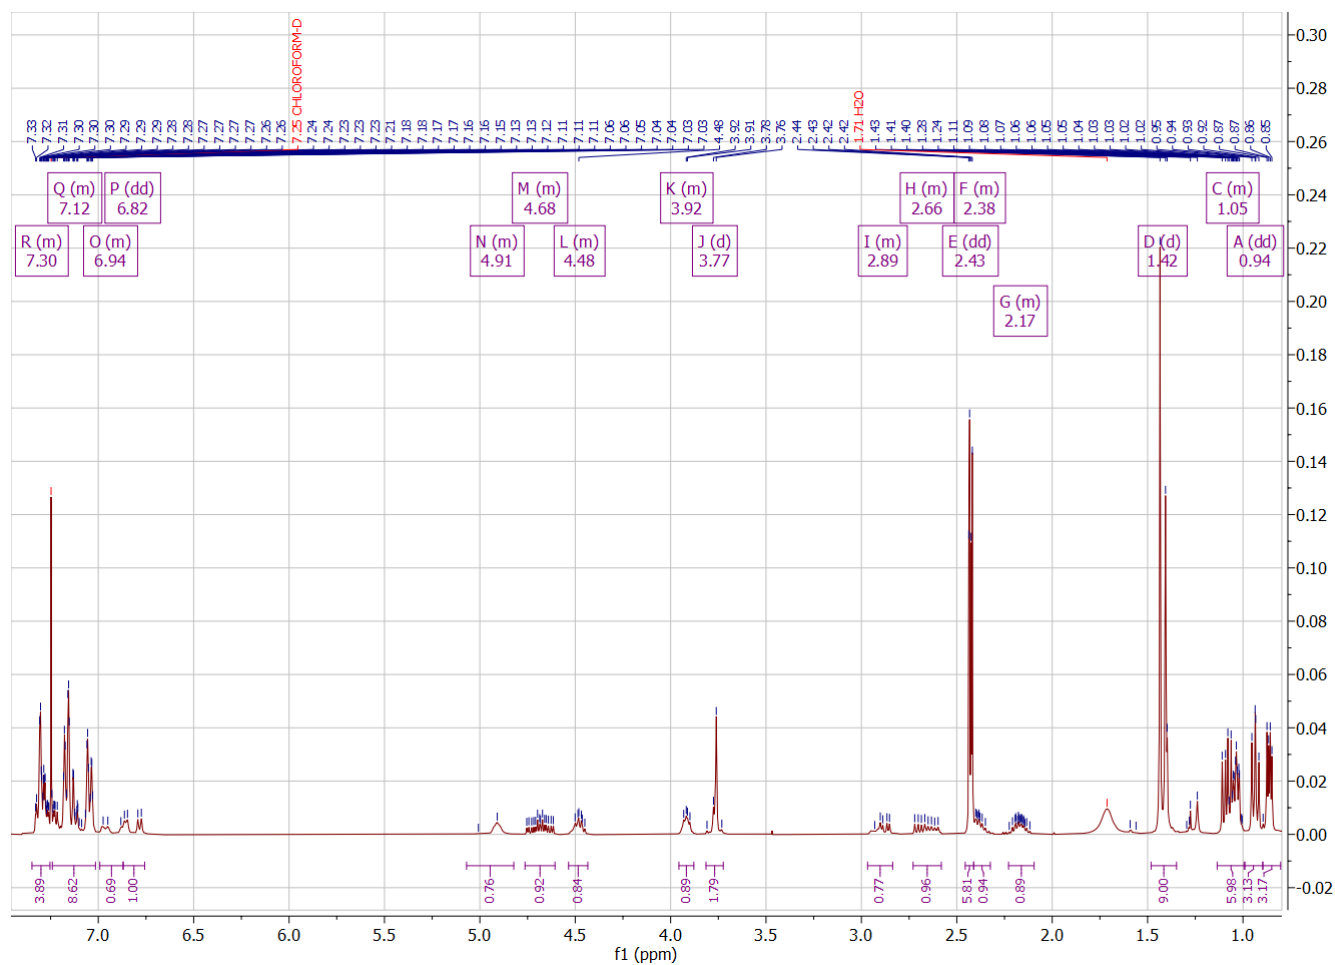

**(48) Boc-L-Val-L-Glu(Bzl)- Val<sup>P</sup>(OPh-4-SCH<sub>3</sub>)<sub>2</sub>**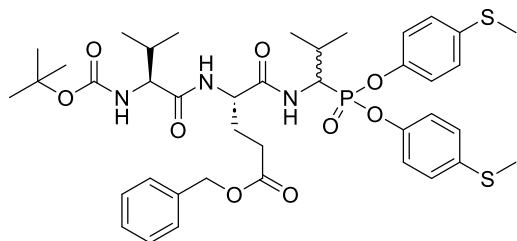

**Name:** benzyl (4S)-5-((1-(bis(4-(methylthio)phenoxy)phosphoryl)-2-methylpropyl)amino)-4-((S)-2-((tert-butoxycarbonyl)amino)-3-methylbutanamido)-5-oxopentanoate

**<sup>31</sup>P NMR** (162 MHz, Chloroform-d) δ 18.23 (s, 43%), 18.17 (s, 57%).

**<sup>1</sup>H NMR** (400 MHz, Chloroform-d) δ 7.37 – 7.26 (m, 5H, 5xArH), 7.24 – 6.93 (m, 10H, 8xArH, 2xNH), 5.16 – 5.05 (m, 2H, CH<sub>2</sub>), 4.99 (dd, J = 26.5, 8.0 Hz, 1H, NH), 4.75 – 4.62 (m, 1H, CHP), 4.57 – 4.47 (m, 1H, CH), 3.93 – 3.85 (m, 1H, CH), 2.68 – 2.53 (m, 1H, 0.5xCH<sub>2</sub>), 2.48 – 2.32 (m, 8H, 2xSCH<sub>3</sub>, 0.5xCH<sub>2</sub>, CH), 2.25 – 1.89 (m, 3H, CH<sub>2</sub>, CH), 1.41 (d, J = 9.3 Hz, 9H, Boc), 1.11 – 1.00 (m, 6H, 2xCH<sub>3</sub>), 0.94 – 0.78 (m, 6H, 2xCH<sub>3</sub>).

**HRMS:** C<sub>40</sub>H<sub>54</sub>N<sub>3</sub>O<sub>9</sub>PS<sub>2</sub> [M+Na]<sup>+</sup> calc. 838.2937 found 838.2911

**HPLC:** purity >99%; retention time 19.583 and 19.860 min

**Chromatogram**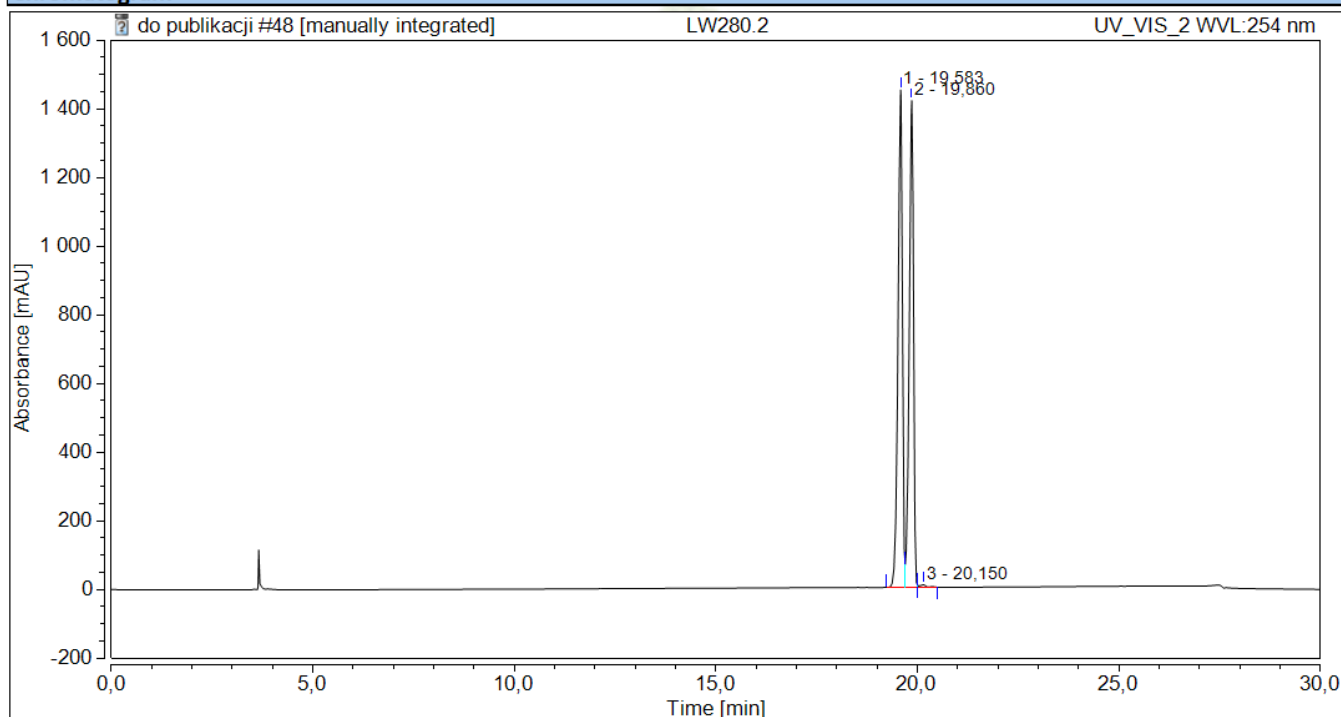**Integration Results**

| No.           | Peak Name | Retention Time min | Area mAU*min   | Height mAU      | Relative Area % | Relative Height % | Amount n.a. |
|---------------|-----------|--------------------|----------------|-----------------|-----------------|-------------------|-------------|
| 1             |           | 19,583             | 182,891        | 1448,310        | 51,26           | 50,41             | n.a.        |
| 2             |           | 19,860             | 172,513        | 1417,250        | 48,35           | 49,33             | n.a.        |
| 3             |           | 20,150             | 1,401          | 7,558           | 0,39            | 0,26              | n.a.        |
| <b>Total:</b> |           |                    | <b>356,805</b> | <b>2873,118</b> | <b>100,00</b>   | <b>100,00</b>     |             |

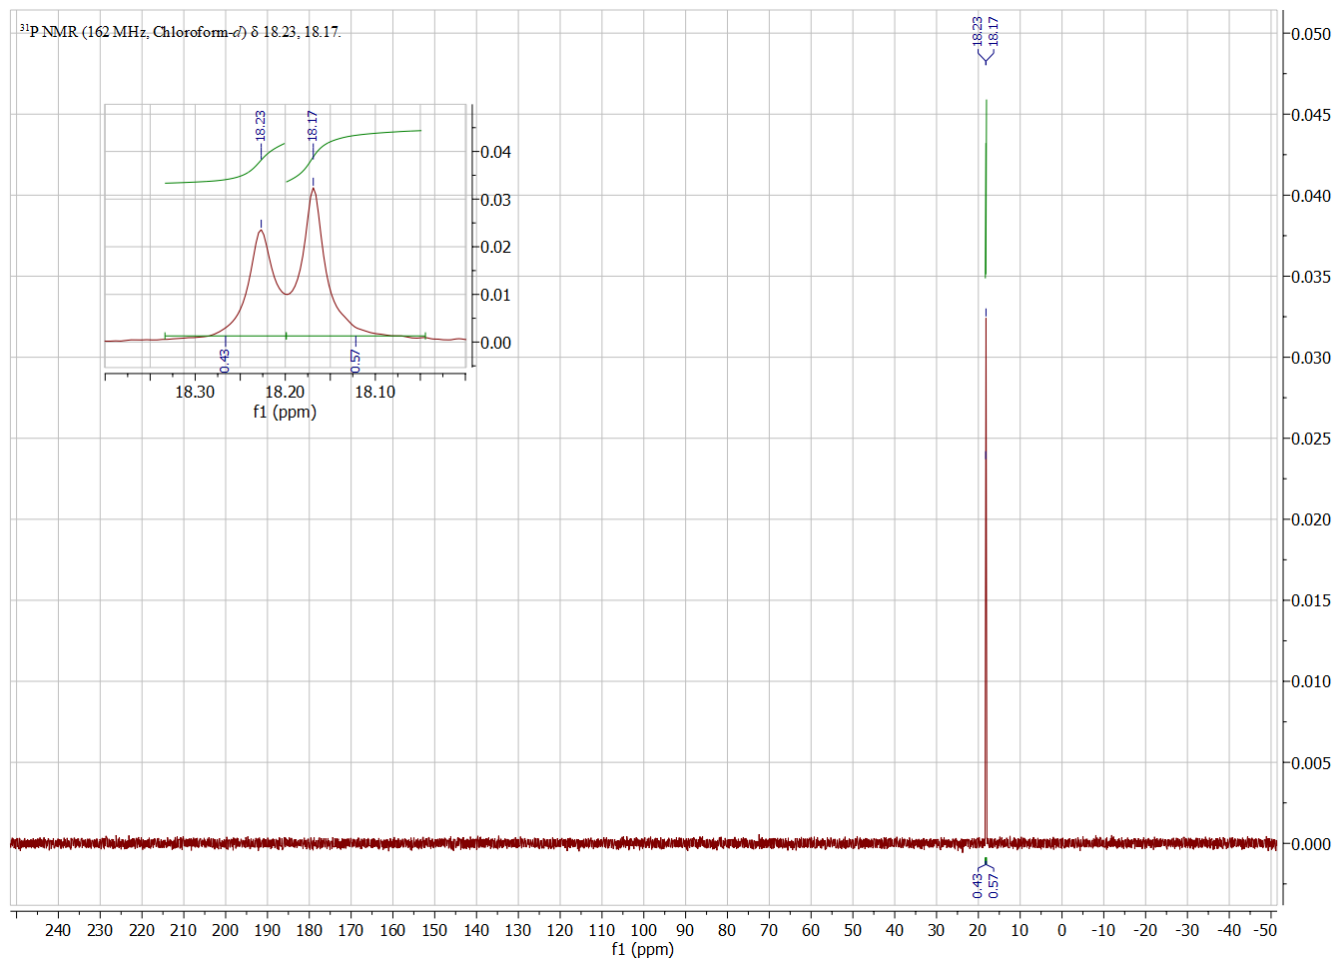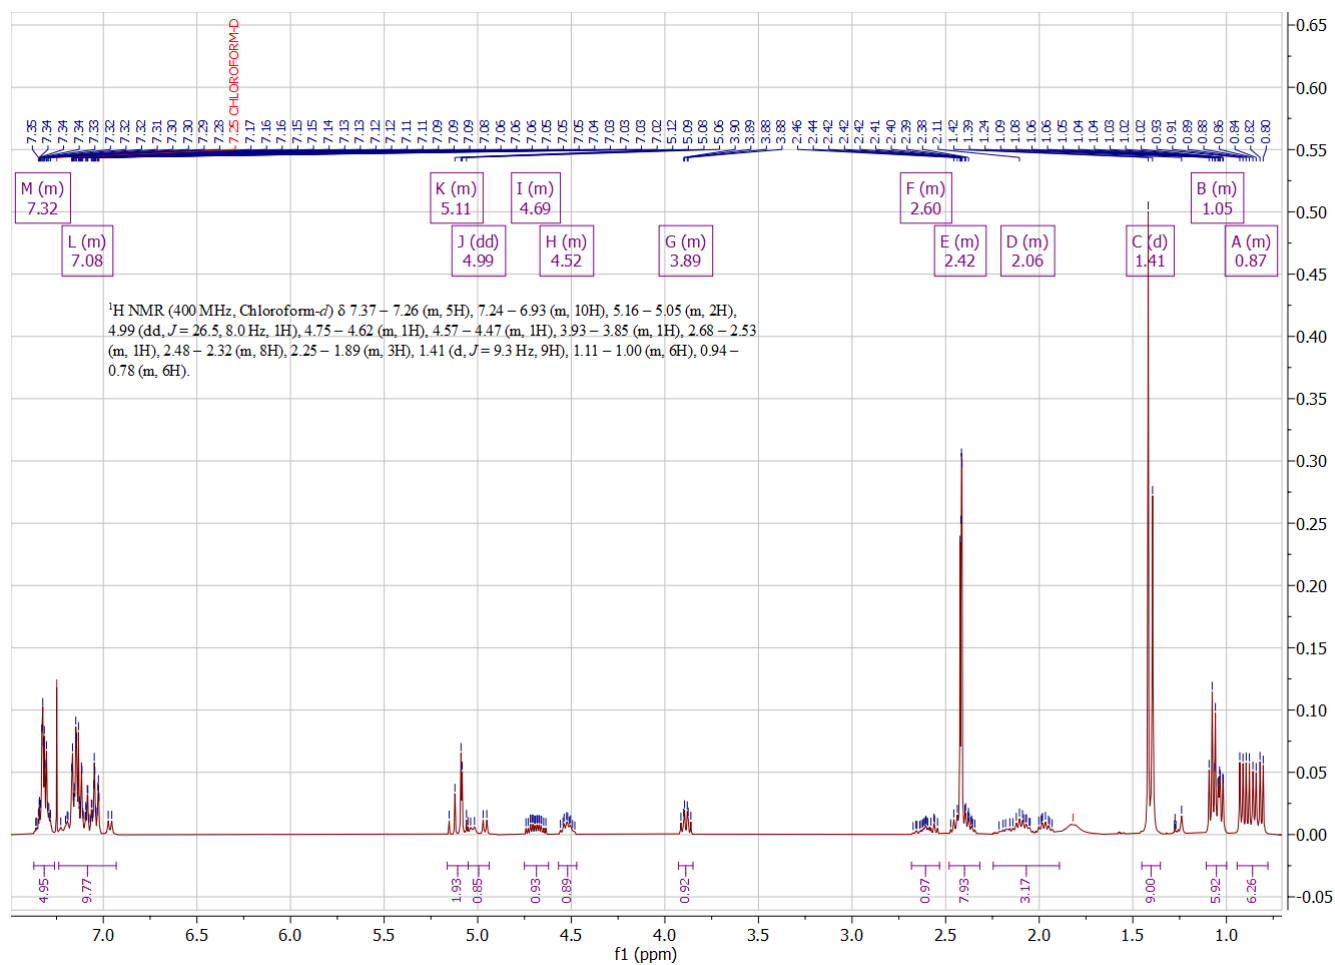

**(49) Boc-L-Val-D-Orn(Z)-Val<sup>P</sup>(OPh-4-SCH<sub>3</sub>)<sub>2</sub>**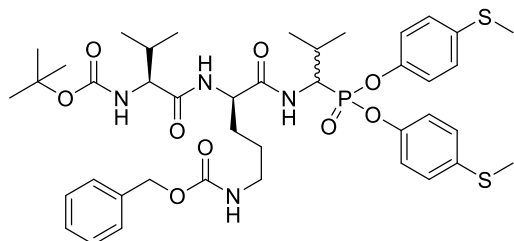

**Name:** *tert*-butyl ((2S)-1-(((2R)-5-(((benzyloxy)carbonyl)amino)-1-((1-(bis(4-(methylthio)phenoxy)phosphoryl)-2-methylpropyl)amino)-1-oxopentan-2-yl)amino)-3-methyl-1-oxobutan-2-yl)carbamate

<sup>31</sup>P NMR (162 MHz, Chloroform-d) δ 18.23 (s, 50%), 18.11 (s, 50%).

<sup>1</sup>H NMR (400 MHz, Chloroform-d) δ 7.51 (dd, J = 32.6, 10.3 Hz, 1H, NH), 7.34 – 7.22 (m, 5H, 5xArH), 7.19 – 7.01 (m, 8H, 8xArH), 7.00 – 6.90 (m, 1H, NH), 5.32 – 5.14 (m, 2H, 2xNH), 5.15 – 4.91 (m, 2H, CH<sub>2</sub>), 4.81 – 4.55 (m, 2H, CHP, CH), 4.02 – 3.88 (m, 1H, CH), 3.47 – 3.30 (m, 1H, 0.5xCH<sub>2</sub>), 3.17 – 2.94 (m, 1H, 0.5xCH<sub>2</sub>), 2.45 – 2.38 (m, 6H, 2xSCH<sub>3</sub>), 2.38 – 2.29 (m, 1H, CH), 2.16 – 2.03 (m, 1H, CH), 1.95 – 1.65 (m, 1H, 0.5x CH<sub>2</sub>), 1.65 – 1.42 (m, 3H, 1.5 CH<sub>2</sub>), 1.39 (d, J = 7.4 Hz, 9H, Boc), 1.16 – 0.97 (m, 6H, 2xCH<sub>3</sub>), 0.93 – 0.80 (m, 6H, 2xCH<sub>3</sub>).

**HRMS:** C<sub>41</sub>H<sub>57</sub>N<sub>4</sub>O<sub>9</sub>PS<sub>2</sub> [M+Na]<sup>+</sup> calc. 867.3202 found 867.3196

**HPLC:** purity >99%; retention time 19.050 and 19.183 min

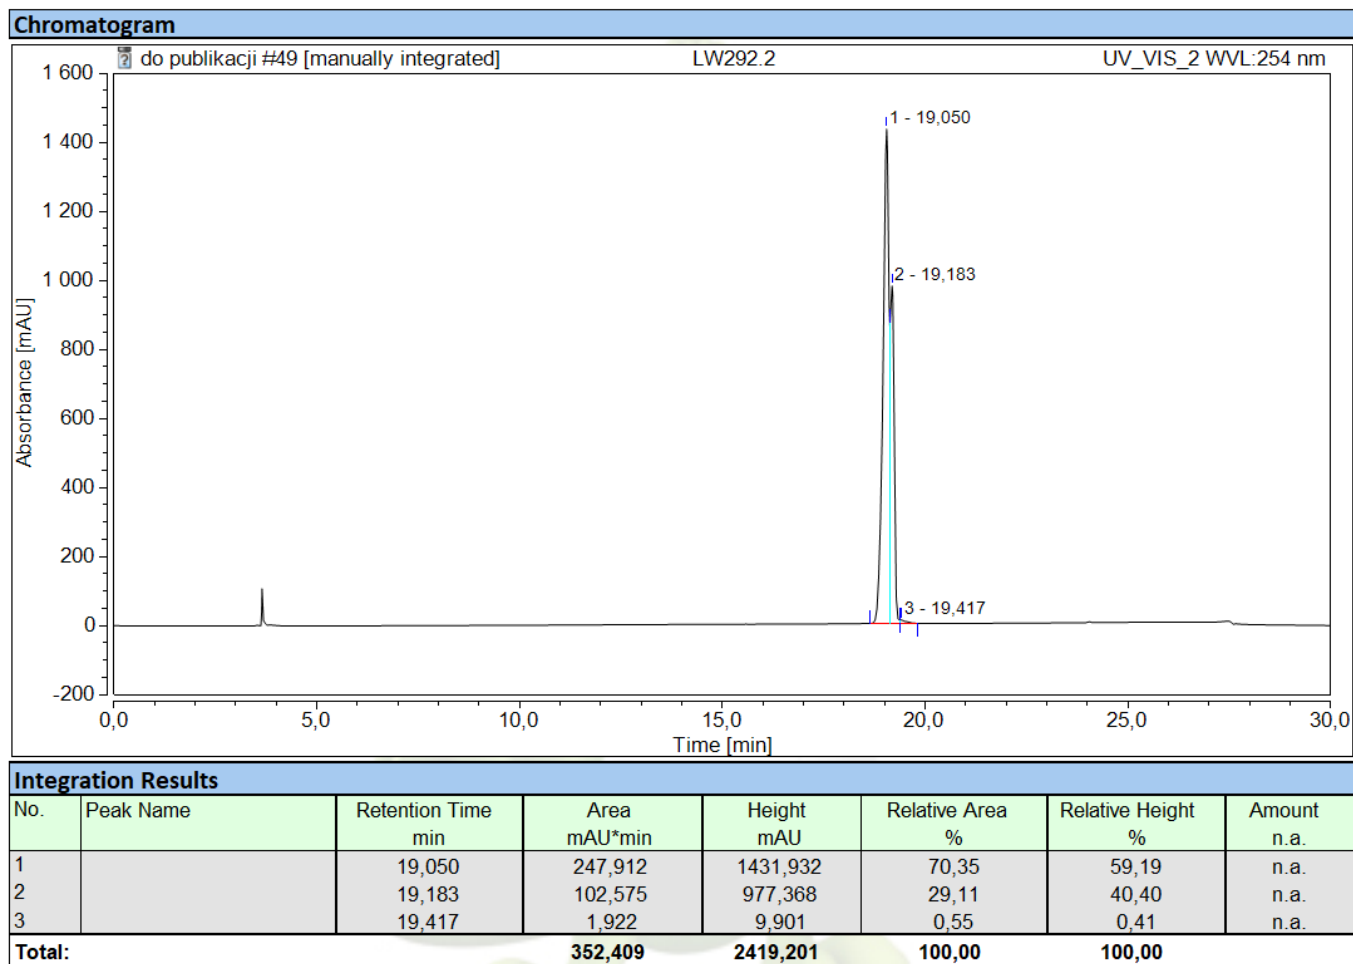

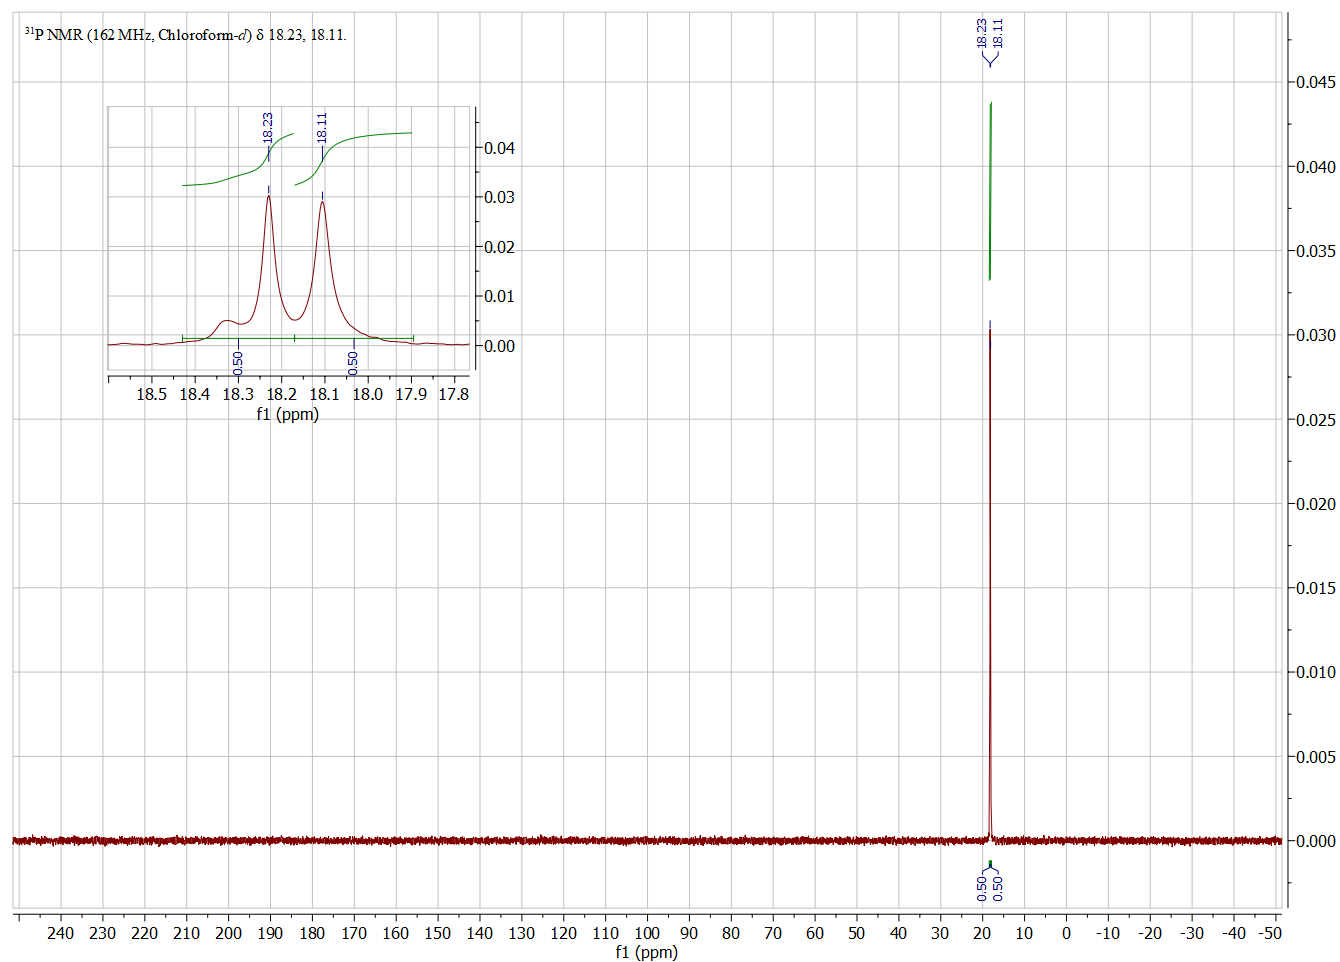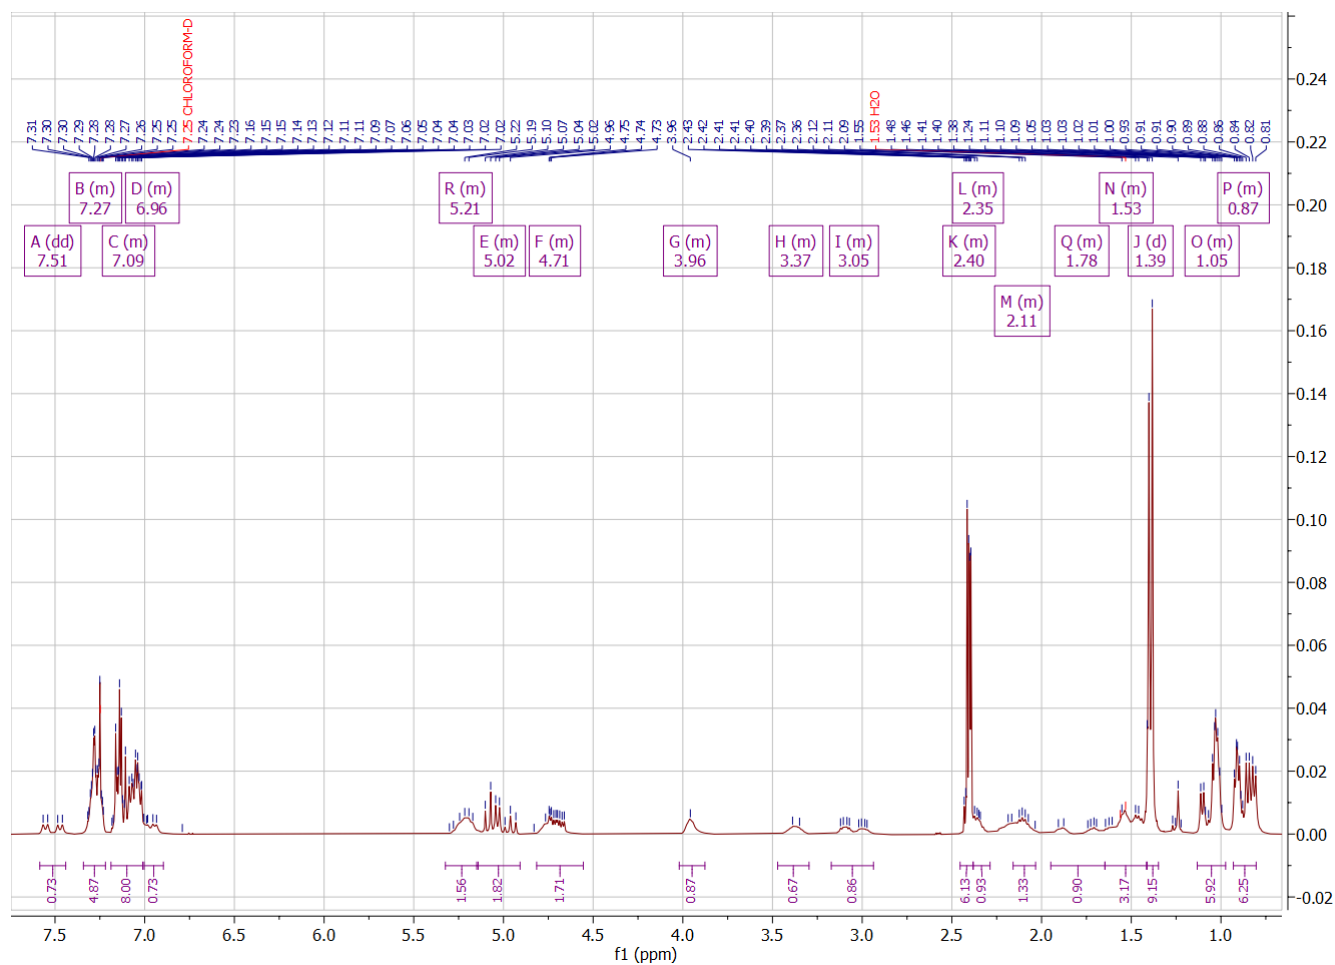

**(50) Boc-L-Val-D-Tyr(Bzl)- Val<sup>P</sup>(OPh-4-SCH<sub>3</sub>)<sub>2</sub>**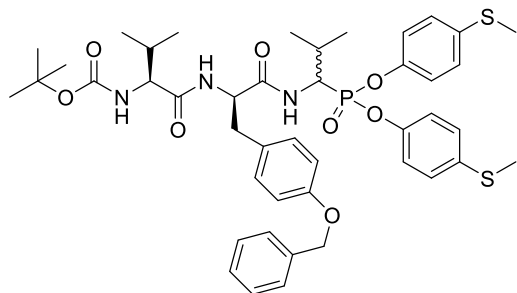

**Name:** *tert*-butyl ((2*S*)-1-(((2*R*)-3-(4-(benzyloxy)phenyl)-1-((1-(bis(4-(methylthio)phenoxy)phosphoryl)-2-methylpropyl)amino)-1-oxopropan-2-yl)amino)-3-methyl-1-oxobutan-2-yl)carbamate

<sup>31</sup>P NMR (162 MHz, Chloroform-*d*) δ 18.18 (s, 57%), 17.97 (s, 43%).

<sup>1</sup>H NMR (400 MHz, Chloroform-*d*) δ 7.44 – 7.25 (m, 5H, 5xArH), 7.21 – 6.90 (m, 11H, 10xArH, NH), 6.87 – 6.76 (m, 2H, 2xArH), 6.54 (dd, *J* = 114.5, 8.0 Hz, 1H, NH), 5.05 (dd, *J* = 41.3, 8.7 Hz, 1H, NH), 4.93 (d, *J* = 27.4 Hz, 2H, CH<sub>2</sub>), 4.80 – 4.61 (m, 2H, CHP, CH), 3.88 – 3.72 (m, 1H, CH), 3.12 – 2.84 (m, 2H, CH<sub>2</sub>), 2.44 – 2.38 (m, 6H, 2xSCH<sub>3</sub>), 2.37 – 2.20 (m, 1H, CH), 2.00 – 1.83 (m, 1H, CH), 1.38 (d, *J* = 4.0 Hz, 9H, Boc), 1.04 – 0.64 (m, 12H, 4xCH<sub>3</sub>).

**HRMS:** C<sub>44</sub>H<sub>56</sub>N<sub>3</sub>O<sub>8</sub>PS<sub>2</sub> [M+Na]<sup>+</sup> calc. 872.3144 found 872.3152

**HPLC:** purity >99%; retention time 20.607 and 20.803 min

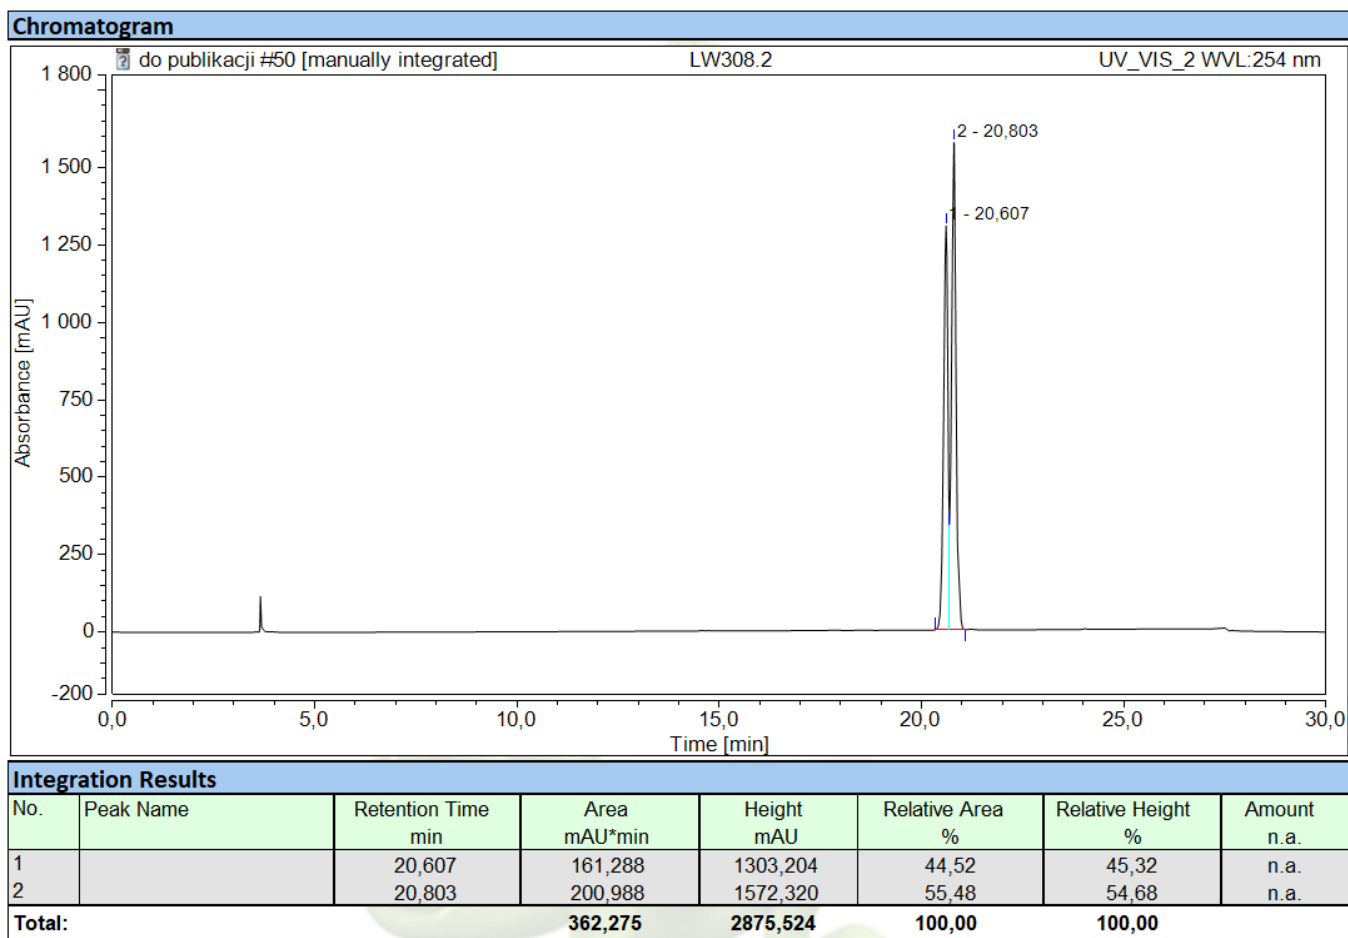

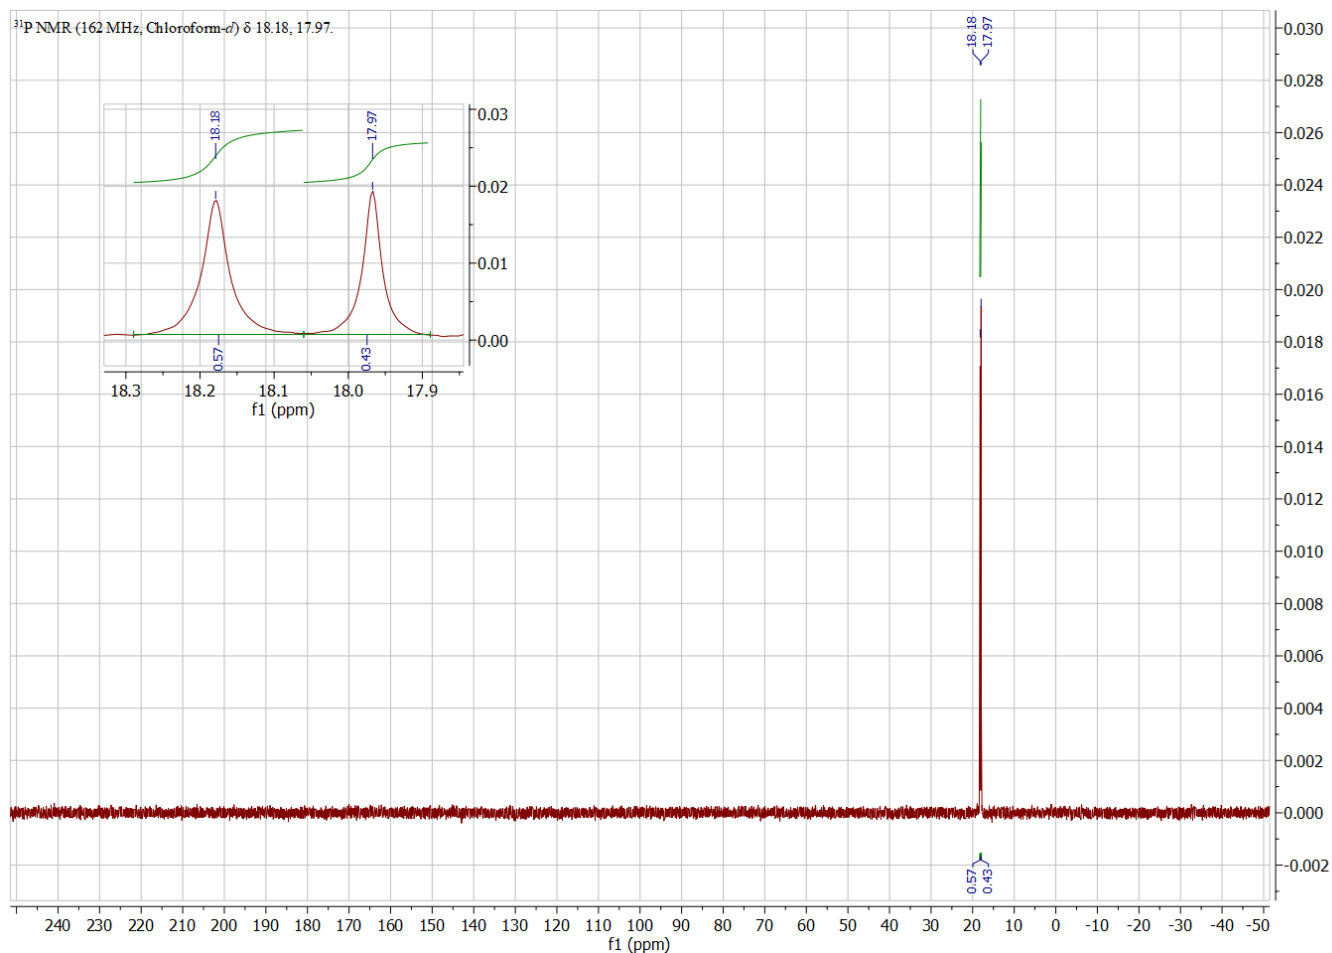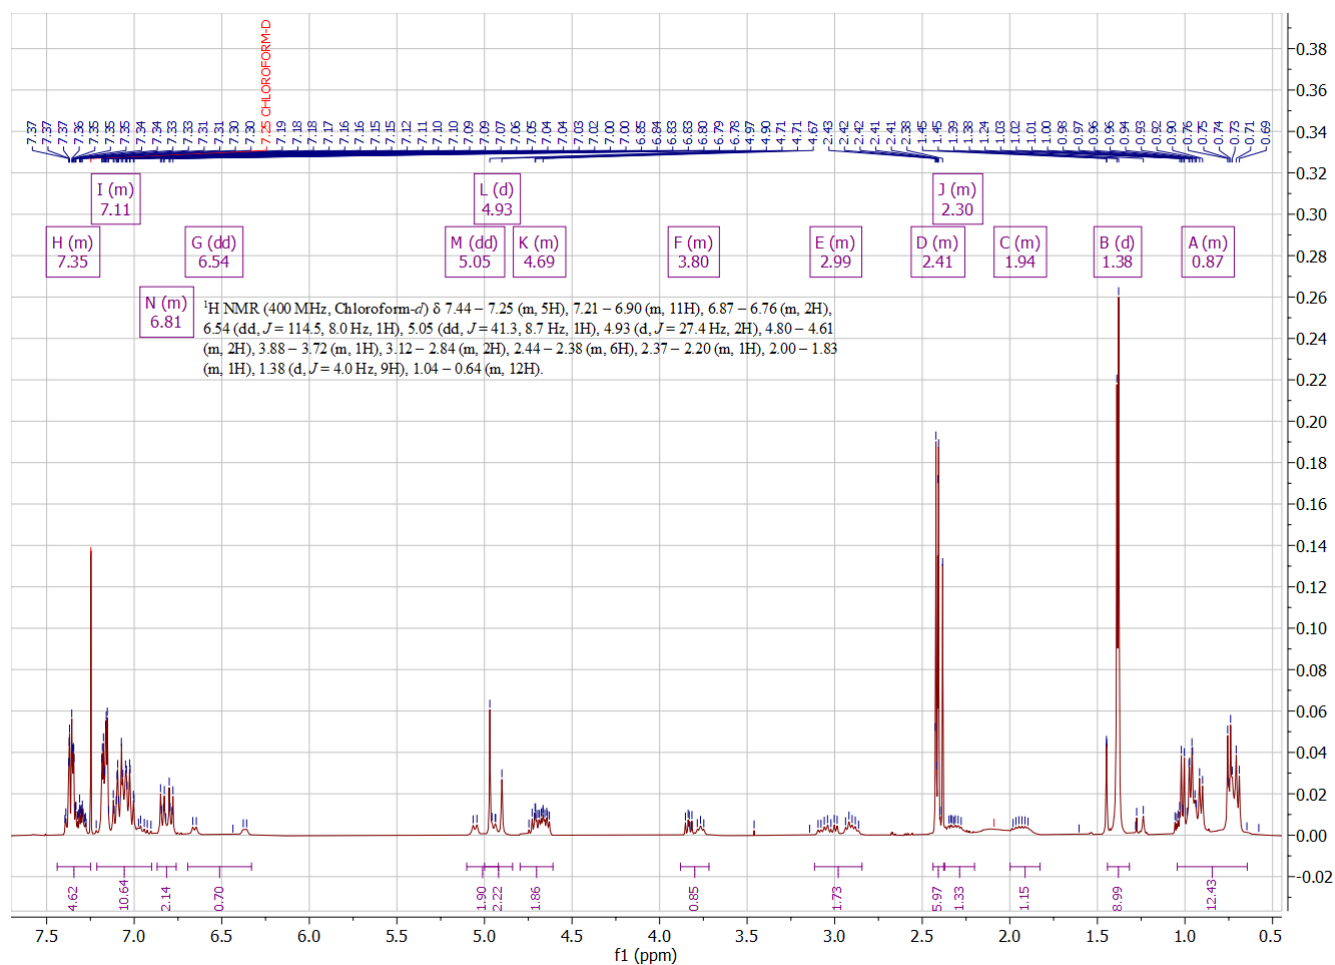

**(51) Boc-L-Val-L-Tyr(Bzl)-Val<sup>P</sup>(OPh-4-SCH<sub>3</sub>)<sub>2</sub>**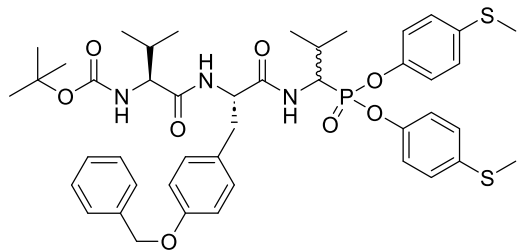

**Name:** *tert*-butyl ((2*S*)-1-(((2*S*)-3-(4-(benzyloxy)phenyl)-1-((1-(bis(4-(methylthio)phenoxy)phosphoryl)-2-methylpropyl)amino)-1-oxopropan-2-yl)amino)-3-methyl-1-oxobutan-2-yl)carbamate

<sup>31</sup>P NMR (162 MHz, Chloroform-*d*) δ 18.13 (s, 42%), 18.06 (s, 58%).

<sup>1</sup>H NMR (400 MHz, Chloroform-*d*) δ 7.41 – 7.25 (m, 5H, 5xArH), 7.24 – 6.90 (m, 11H, 10xArH, NH), 6.88 – 6.78 (m, 2H, 2xArH), 6.54 (d, *J* = 8.9 Hz, 1H, NH), 5.08 – 4.81 (m, 3H, CH<sub>2</sub>, NH), 4.76 – 4.60 (m, 2H, CHP, CH), 3.90 – 3.81 (m, 1H, CH), 3.16 – 2.91 (m, 2H, CH<sub>2</sub>), 2.44 – 2.37 (m, 6H, 2xSCH<sub>3</sub>), 2.37 – 2.23 (m, 1H, CH), 2.18 – 2.02 (m, 1H, CH), 1.39 (d, *J* = 7.3 Hz, 9H, Boc), 1.08 – 0.90 (m, 6H, 2xCH<sub>3</sub>), 0.90 – 0.71 (m, 6H, 2xCH<sub>3</sub>).

**HRMS:** C<sub>44</sub>H<sub>56</sub>N<sub>3</sub>O<sub>8</sub>PS<sub>2</sub> [M+Na]<sup>+</sup> calc. 872.3144 found 872.3138

**HPLC:** purity >98%; retention time 20.450 and 20.627 min

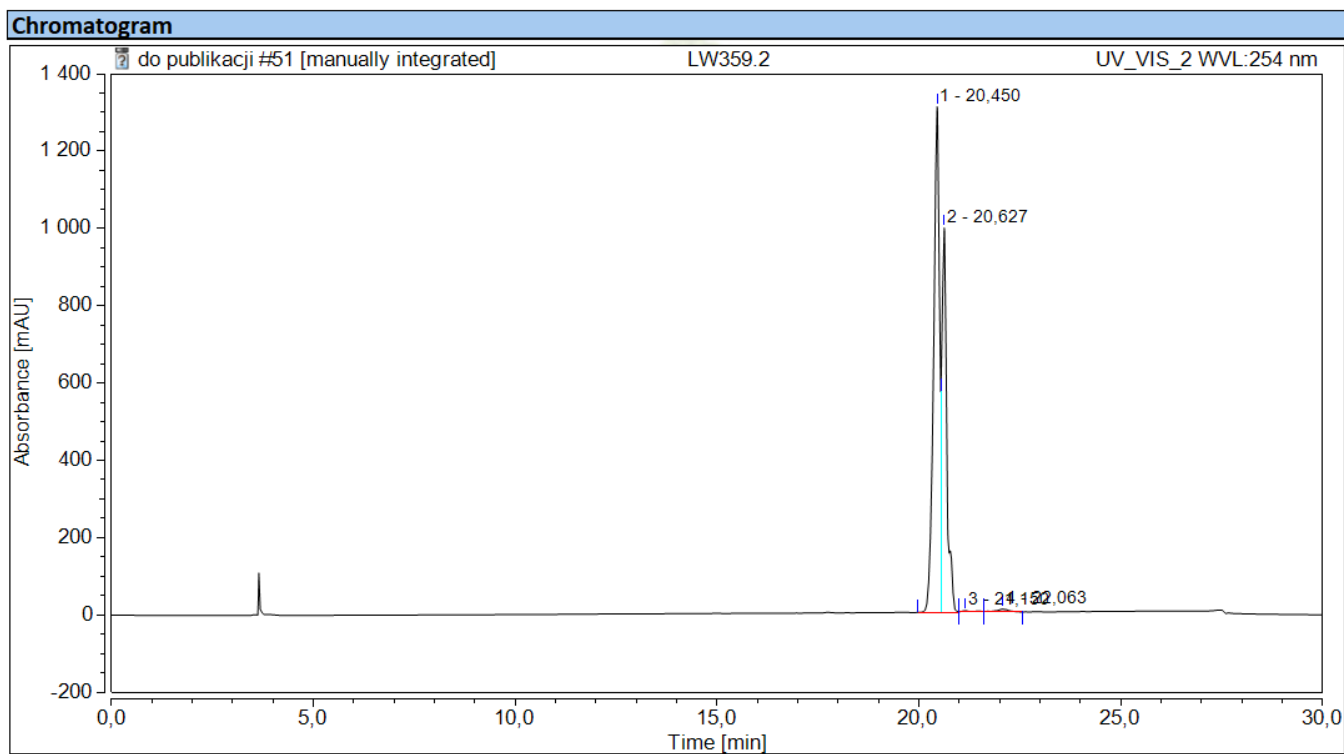

| Integration Results |           |                       |                 |                 |                    |                      |                |
|---------------------|-----------|-----------------------|-----------------|-----------------|--------------------|----------------------|----------------|
| No.                 | Peak Name | Retention Time<br>min | Area<br>mAU*min | Height<br>mAU   | Relative Area<br>% | Relative Height<br>% | Amount<br>n.a. |
| 1                   |           | 20,450                | 217,666         | 1308,190        | 59,62              | 56,54                | n.a.           |
| 2                   |           | 20,627                | 143,035         | 994,418         | 39,18              | 42,98                | n.a.           |
| 3                   |           | 21,150                | 1,514           | 3,923           | 0,41               | 0,17                 | n.a.           |
| 4                   |           | 22,063                | 2,867           | 7,411           | 0,79               | 0,32                 | n.a.           |
| <b>Total:</b>       |           |                       | <b>365,082</b>  | <b>2313,942</b> | <b>100,00</b>      | <b>100,00</b>        |                |



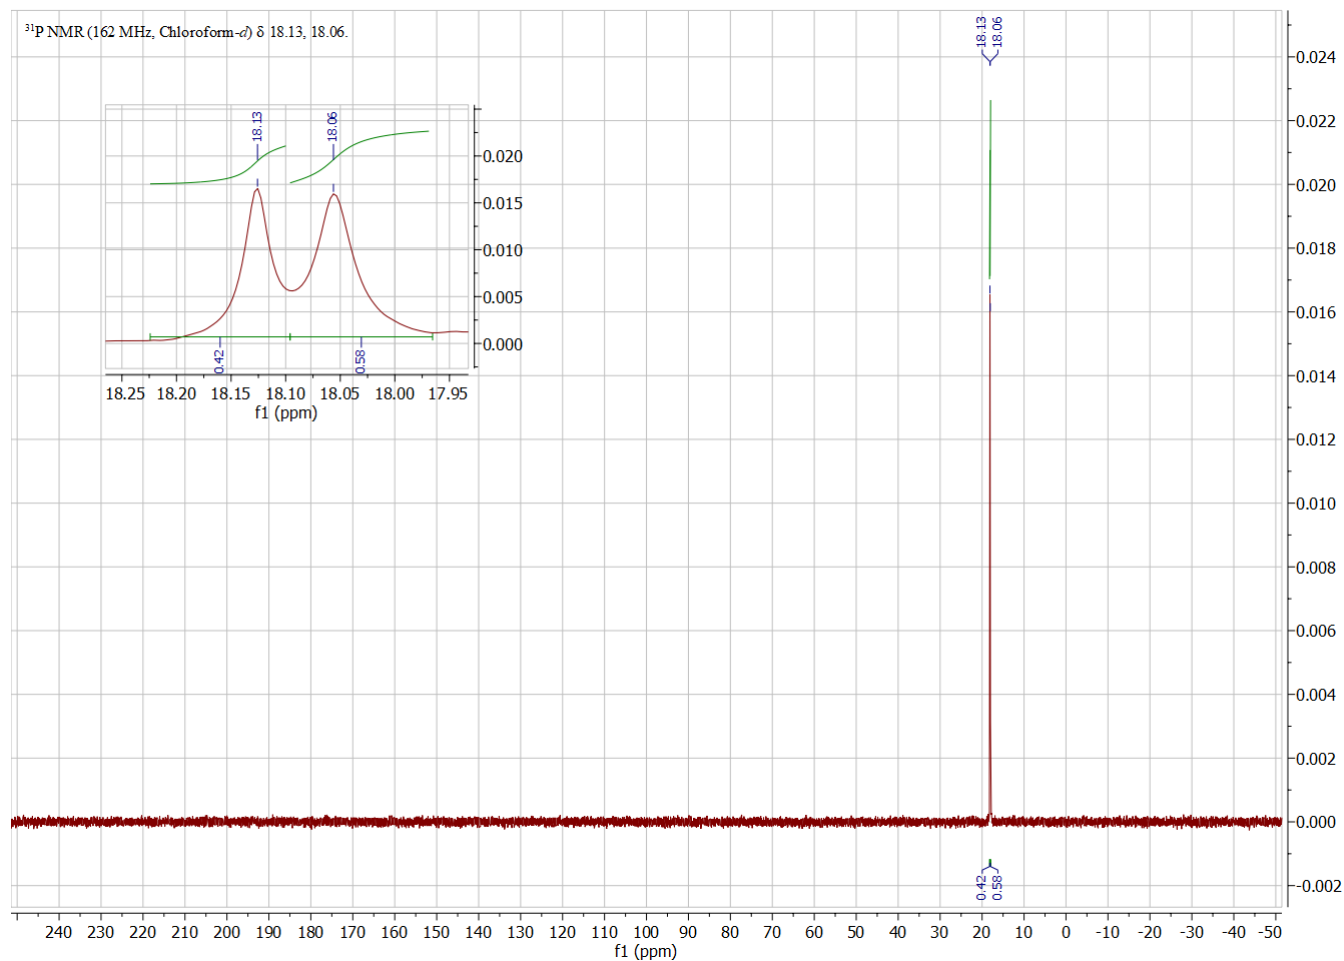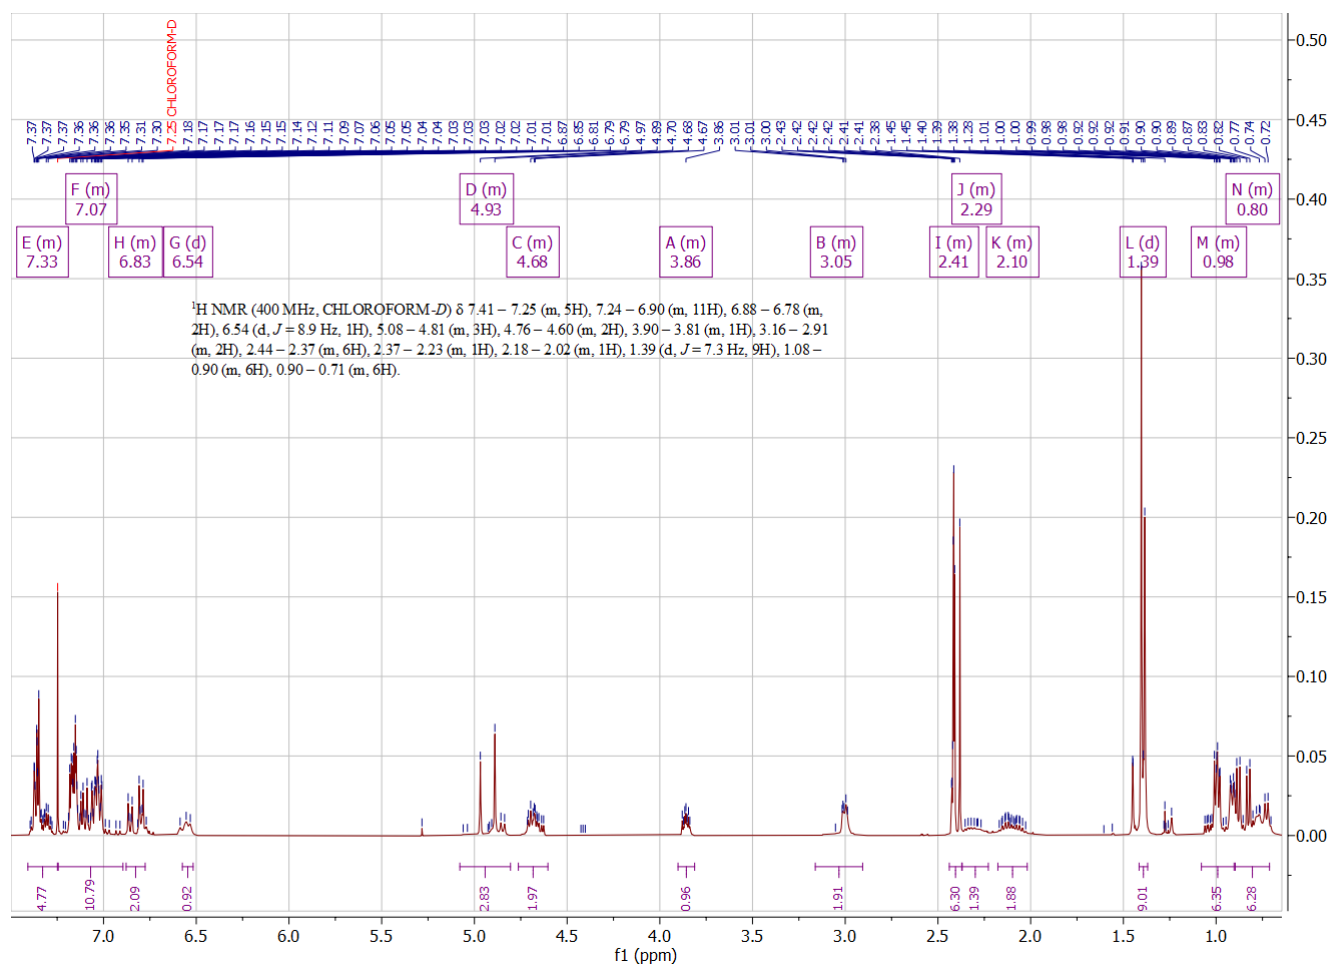

**(52) Boc-L-Val-L-Lys(Z)-Val<sup>P</sup>(OPh-4-SCH<sub>3</sub>)<sub>2</sub>**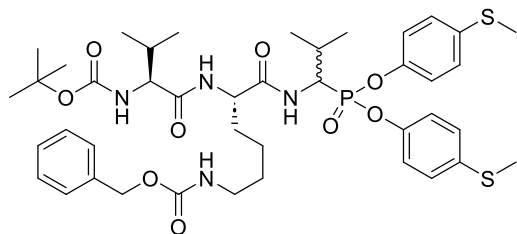

**Name:** *tert*-butyl ((2*S*)-1-(((2*S*)-6-(((benzyloxy)carbonyl)amino)-1-((1-(bis(4-(methylthio)phenoxy)phosphoryl)-2-methylpropyl)amino)-1-oxohexan-2-yl)amino)-3-methyl-1-oxobutan-2-yl)carbamate

<sup>31</sup>P NMR (162 MHz, Chloroform-*d*) δ 18.21 (s, 49%), 18.12 (s, 51%).

<sup>1</sup>H NMR (400 MHz, Chloroform-*d*) δ 7.39 – 7.26 (m, 5H, 5xArH), 7.22 – 7.12 (m, 4H, 4xArH), 7.12 – 6.95 (m, 5H, 4xArH, NH), 6.82 – 6.68 (m, 1H, NH), 5.48 – 4.97 (m, 4H, CH<sub>2</sub>, 2xNH), 4.78 – 4.64 (m, 1H, CHP), 4.51 – 4.17 (m, 1H, CH), 4.00 – 3.70 (m, 1H, CH), 3.23 – 2.76 (m, 2H, CH<sub>2</sub>), 2.46 – 2.30 (m, 7H, 2xSCH<sub>3</sub>, CH), 2.18 – 2.02 (m, 1H, CH), 1.75 – 1.43 (m, 4H, 2xCH<sub>2</sub>), 1.40 (d, *J* = 5.6 Hz, 9H, Boc), 1.38 – 1.25 (m, 2H, CH<sub>2</sub>), 1.09 – 1.00 (m, 6H, 2xCH<sub>3</sub>), 0.96 – 0.89 (m, 3H, CH<sub>3</sub>), 0.88 – 0.81 (m, 3H, CH<sub>3</sub>).

**HRMS:** C<sub>42</sub>H<sub>59</sub>N<sub>4</sub>O<sub>9</sub>PS<sub>2</sub> [M+Na]<sup>+</sup> calc. 881.3359 found 881.3330

**HPLC:** purity >98%; retention time 19.273 and 19.447 min

**Chromatogram**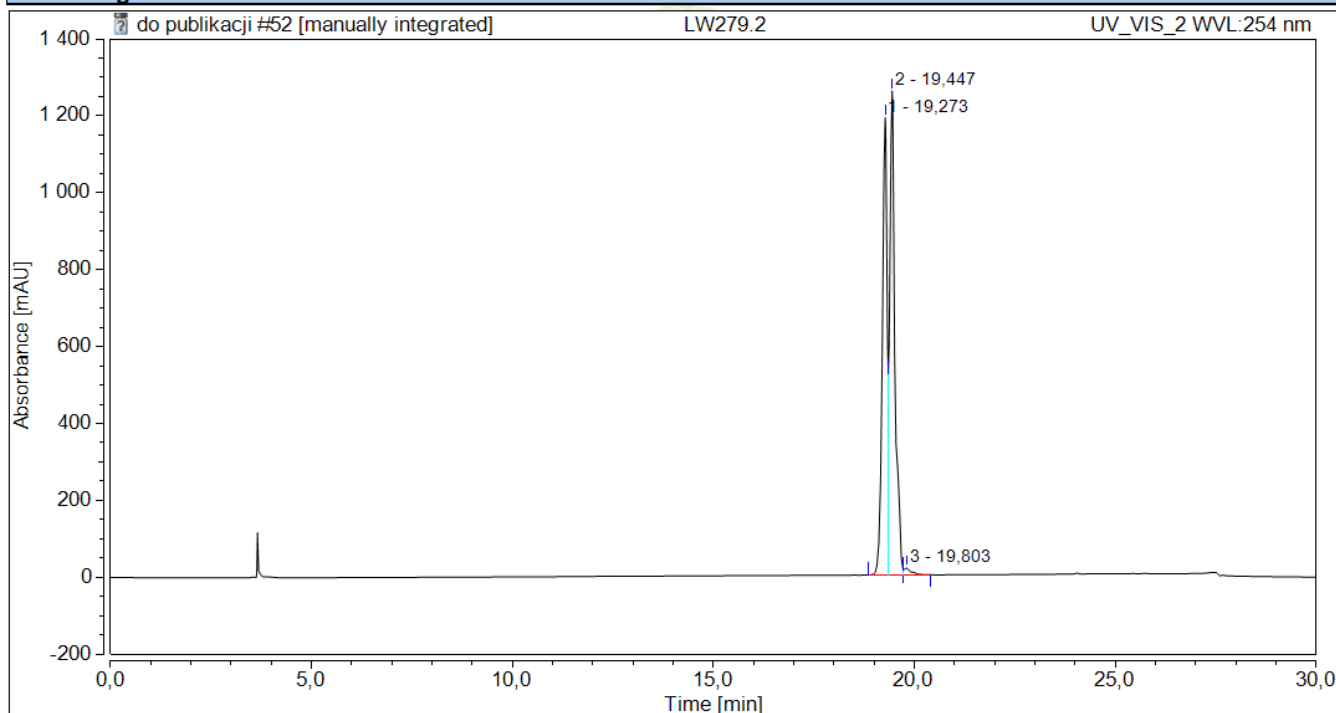**Integration Results**

| No.           | Peak Name | Retention Time<br>min | Area<br>mAU*min | Height<br>mAU   | Relative Area<br>% | Relative Height<br>% | Amount<br>n.a. |
|---------------|-----------|-----------------------|-----------------|-----------------|--------------------|----------------------|----------------|
| 1             |           | 19,273                | 164,458         | 1189,753        | 46,12              | 48,24                | n.a.           |
| 2             |           | 19,447                | 188,357         | 1258,740        | 52,82              | 51,03                | n.a.           |
| 3             |           | 19,803                | 3,809           | 17,933          | 1,07               | 0,73                 | n.a.           |
| <b>Total:</b> |           |                       | <b>356,624</b>  | <b>2466,426</b> | <b>100,00</b>      | <b>100,00</b>        |                |

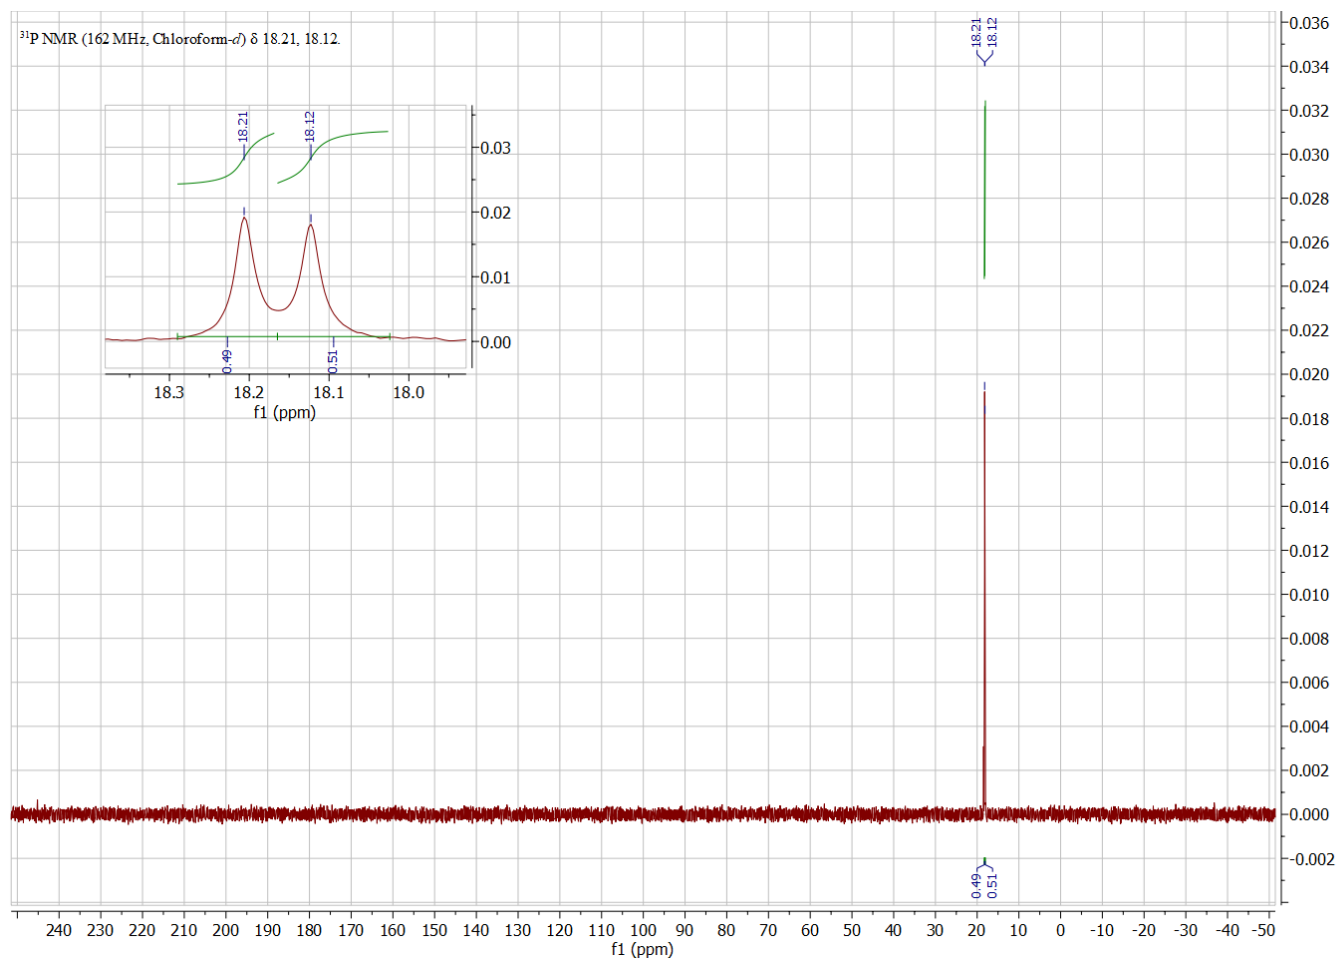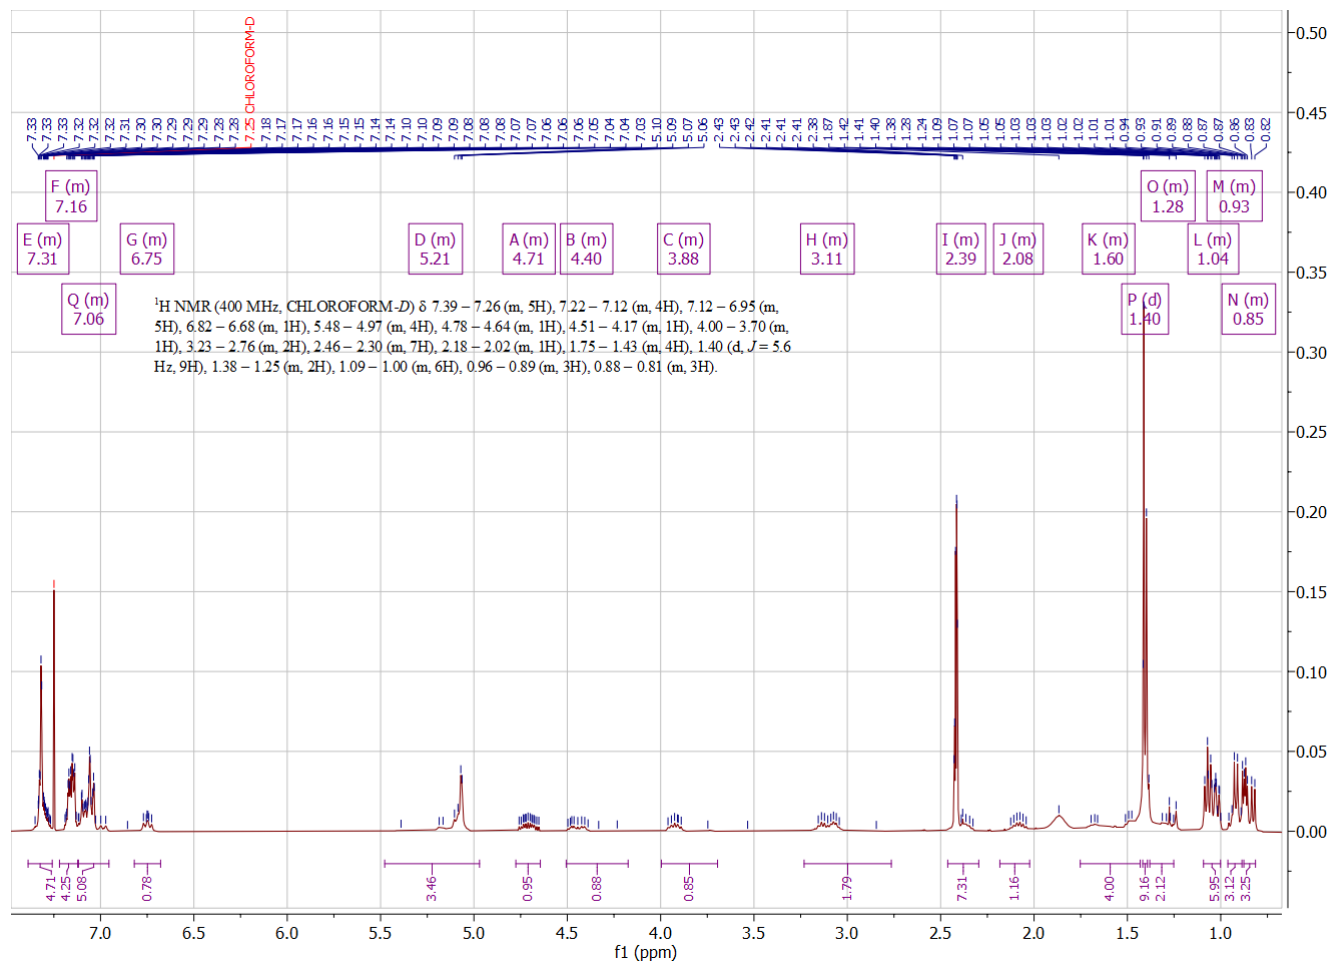

**(53) Boc-L-Val-D-Lys(Z)-Val<sup>P</sup>(OPh-4-SCH<sub>3</sub>)<sub>2</sub>**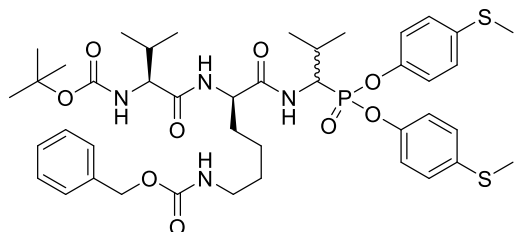

**Name:** *tert*-butyl ((2*S*)-1-(((2*R*)-6-(((benzyloxy)carbonyl)amino)-1-((1-(bis(4-(methylthio)phenoxy)phosphoryl)-2-methylpropyl)amino)-1-oxohexan-2-yl)amino)-3-methyl-1-oxobutan-2-yl)carbamate

<sup>31</sup>P NMR (162 MHz, Chloroform-*d*) δ 18.14 (s, 56%), 18.00 (s, 44%).

<sup>1</sup>H NMR (400 MHz, Chloroform-*d*) δ 7.36 – 7.26 (m, 6H, 5xArH, NH), 7.18 – 7.11 (m, 4H, 4xArH), 7.09 – 7.01 (m, 4H, 4xArH), 6.98 – 6.80 (m, 1H, NH), 5.33 – 4.98 (m, 4H, CH<sub>2</sub>, 2xNH), 4.77 – 4.62 (m, 1H, CHP), 4.57 – 4.43 (m, 1H, CH), 4.02 – 3.81 (m, 1H, CH), 3.21 – 2.92 (m, 2H, CH<sub>2</sub>), 2.40 (dd, *J* = 5.9, 3.7 Hz, 6H, 2xSCH<sub>3</sub>), 2.38 – 2.29 (m, 1H, CH), 2.14 – 1.98 (m, 1H, CH), 1.92 – 1.41 (m, 4H, 2xCH<sub>2</sub>), 1.38 (d, *J* = 6.6 Hz, 9H, Boc), 1.34 – 1.23 (m, 2H, CH<sub>2</sub>), 1.05 – 0.98 (m, 6H, 2xCH<sub>3</sub>), 0.90 (dd, *J* = 6.8, 2.3 Hz, 3H, CH<sub>3</sub>), 0.83 (dd, *J* = 13.2, 6.8 Hz, 3H, CH<sub>3</sub>).

**HRMS:** C<sub>42</sub>H<sub>59</sub>N<sub>4</sub>O<sub>9</sub>PS<sub>2</sub> [M+Na]<sup>+</sup> calc. 881.3359 found 881.3366

**HPLC:** purity >99%; retention time 19.210 and 19.393 min

**Chromatogram**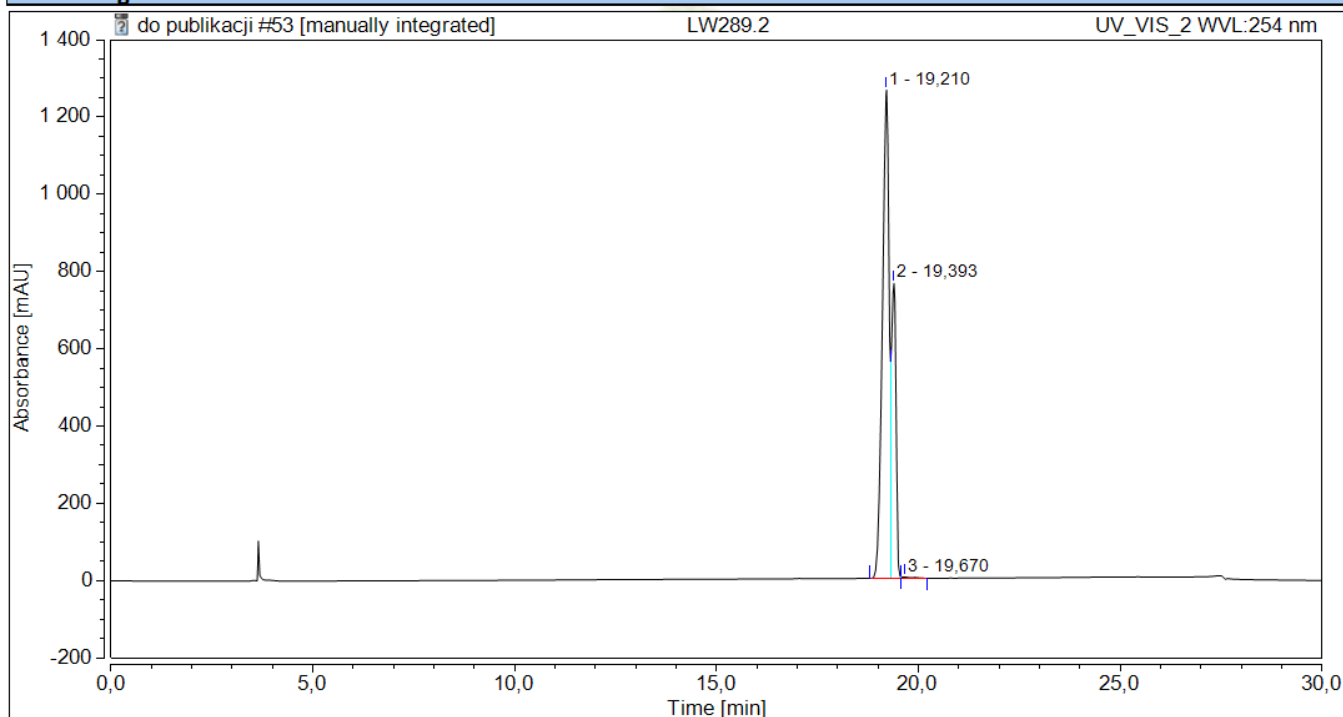**Integration Results**

| No.           | Peak Name | Retention Time<br>min | Area<br>mAU*min | Height<br>mAU   | Relative Area<br>% | Relative Height<br>% | Amount<br>n.a. |
|---------------|-----------|-----------------------|-----------------|-----------------|--------------------|----------------------|----------------|
| 1             |           | 19,210                | 237,330         | 1263,966        | 69,01              | 62,23                | n.a.           |
| 2             |           | 19,393                | 105,510         | 763,671         | 30,68              | 37,60                | n.a.           |
| 3             |           | 19,670                | 1,076           | 3,348           | 0,31               | 0,16                 | n.a.           |
| <b>Total:</b> |           |                       | <b>343,916</b>  | <b>2030,985</b> | <b>100,00</b>      | <b>100,00</b>        |                |

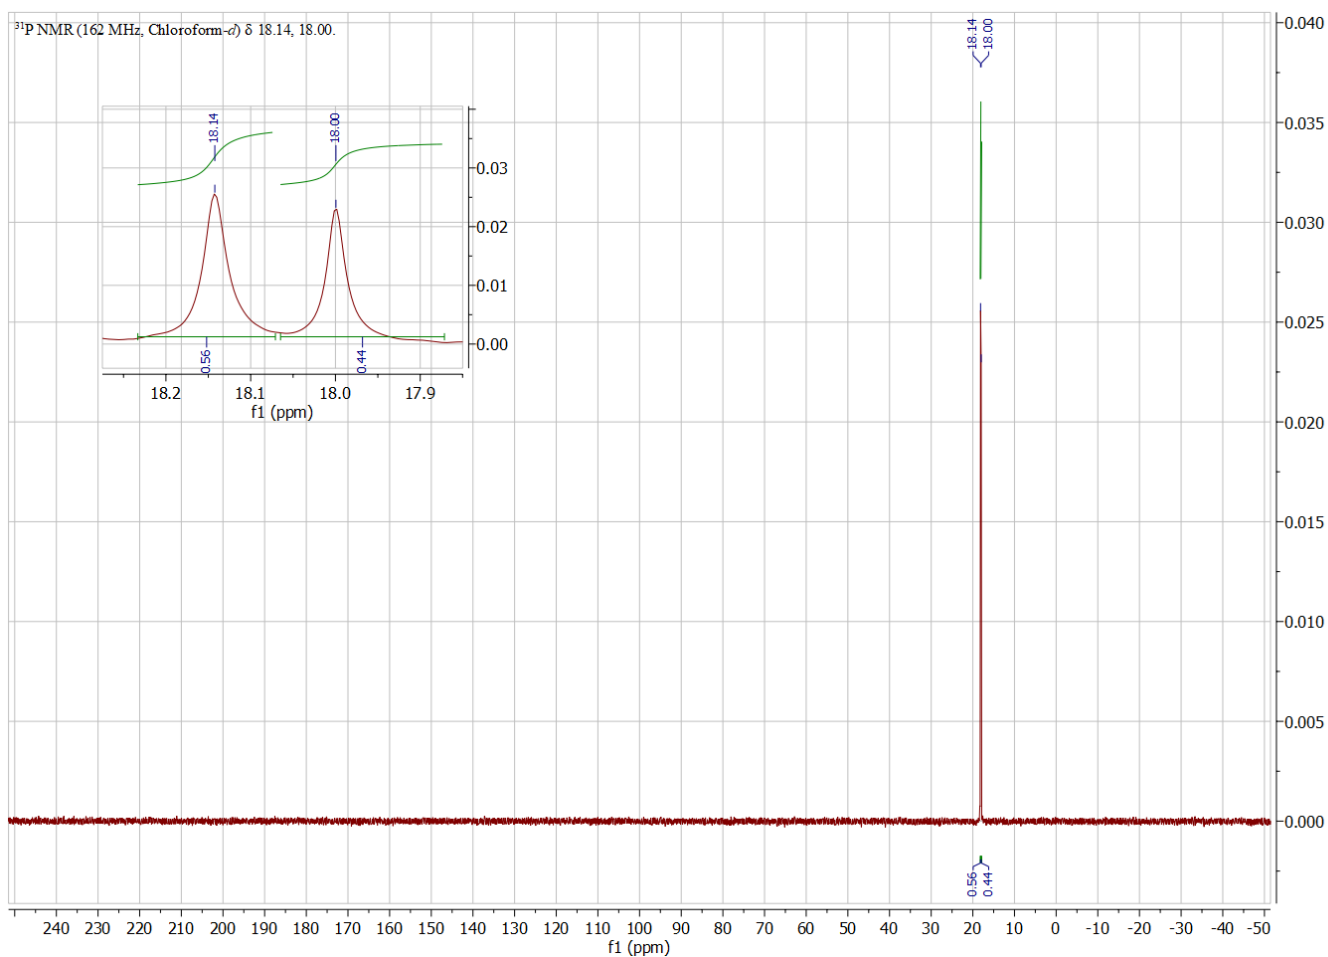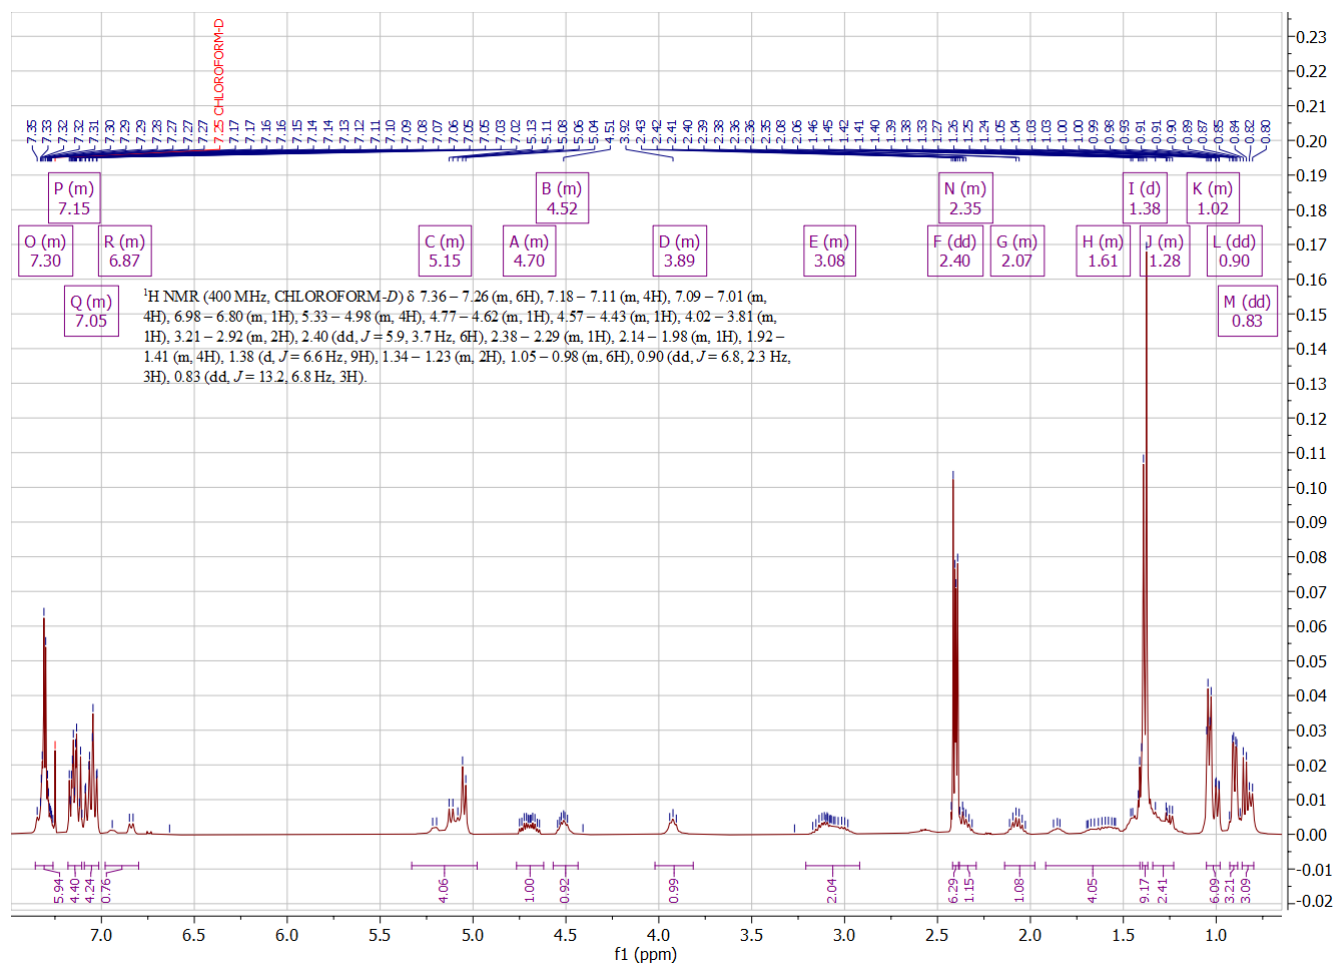

(54) 353.2 Boc-L-Val-L-Hyp(Bzl)-Val<sup>P</sup>(OPh-4-SCH<sub>3</sub>)<sub>2</sub>

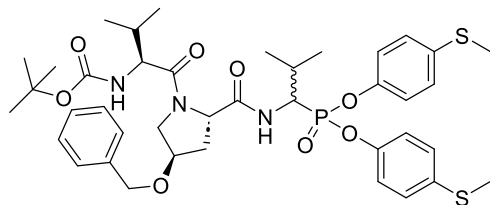

**Name:** *tert*-butyl ((2*S*)-1-((2*S*,4*R*)-4-(benzyloxy)-2-((1-(bis(4-(methylthio)phenoxy)phosphoryl)-2-methylpropyl)carbamoyl)pyrrolidin-1-yl)-3-methyl-1-oxobutan-2-yl)carbamate

<sup>31</sup>P NMR (162 MHz, Chloroform-*d*) δ 18.31 (s, 30%), 17.83 (s, 70%).

<sup>1</sup>H NMR (400 MHz, Chloroform-*d*) δ 7.36 – 7.25 (m, 6H, 5xArH, NH), 7.20 – 7.14 (m, 4H, 4xArH), 7.12 – 7.02 (m, 4H, 4xArH), 5.38 (dd, *J* = 84.6, 9.3 Hz, 1H, NH), 4.78 – 4.65 (m, 1H, CHP), 4.63 – 4.41 (m, 3H, CH<sub>2</sub>, CH), 4.31 – 4.13 (m, 2H, CH<sub>2</sub>), 4.11 – 3.97 (m, 1H, CH), 3.72 – 3.54 (m, 1H, CH), 2.46 – 2.40 (m, 6H, 2xSCH<sub>3</sub>), 2.40 – 2.31 (m, 1H, CH), 2.30 – 2.15 (m, 1H, CH), 2.12 – 2.03 (m, 1H, 0.5xCH<sub>2</sub>), 2.00 – 1.80 (m, 1H, 0.5xCH<sub>2</sub>), 1.40 (d, *J* = 1.9 Hz, 9H, Boc), 1.12 – 1.00 (m, 6H, 2xCH<sub>3</sub>), 0.96 – 0.81 (m, 6H, 2xCH<sub>3</sub>).

**HRMS:** C<sub>40</sub>H<sub>54</sub>N<sub>3</sub>O<sub>8</sub>PS<sub>2</sub> [M+Na]<sup>+</sup> calc. 822.2988 found 822.2994

**HPLC:** purity >99%; retention time 20.320 and 20.553 min

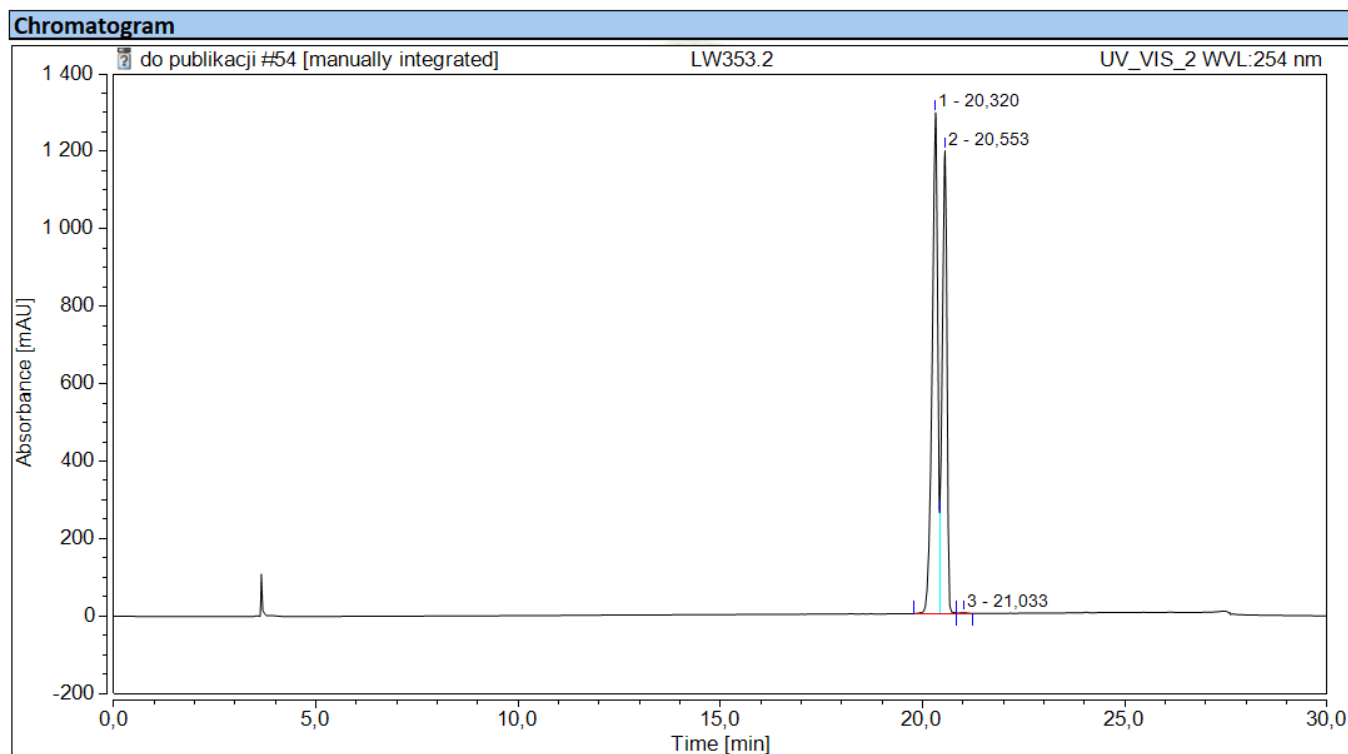

| Integration Results |           |                    |              |            |                 |                   |             |
|---------------------|-----------|--------------------|--------------|------------|-----------------|-------------------|-------------|
| No.                 | Peak Name | Retention Time min | Area mAU*min | Height mAU | Relative Area % | Relative Height % | Amount n.a. |
| 1                   |           | 20,320             | 203,490      | 1293,574   | 55,66           | 51,93             | n.a.        |
| 2                   |           | 20,553             | 161,688      | 1195,335   | 44,23           | 47,99             | n.a.        |
| 3                   |           | 21,033             | 0,421        | 1,901      | 0,12            | 0,08              | n.a.        |
| Total:              |           |                    | 365,599      | 2490,810   | 100,00          | 100,00            |             |

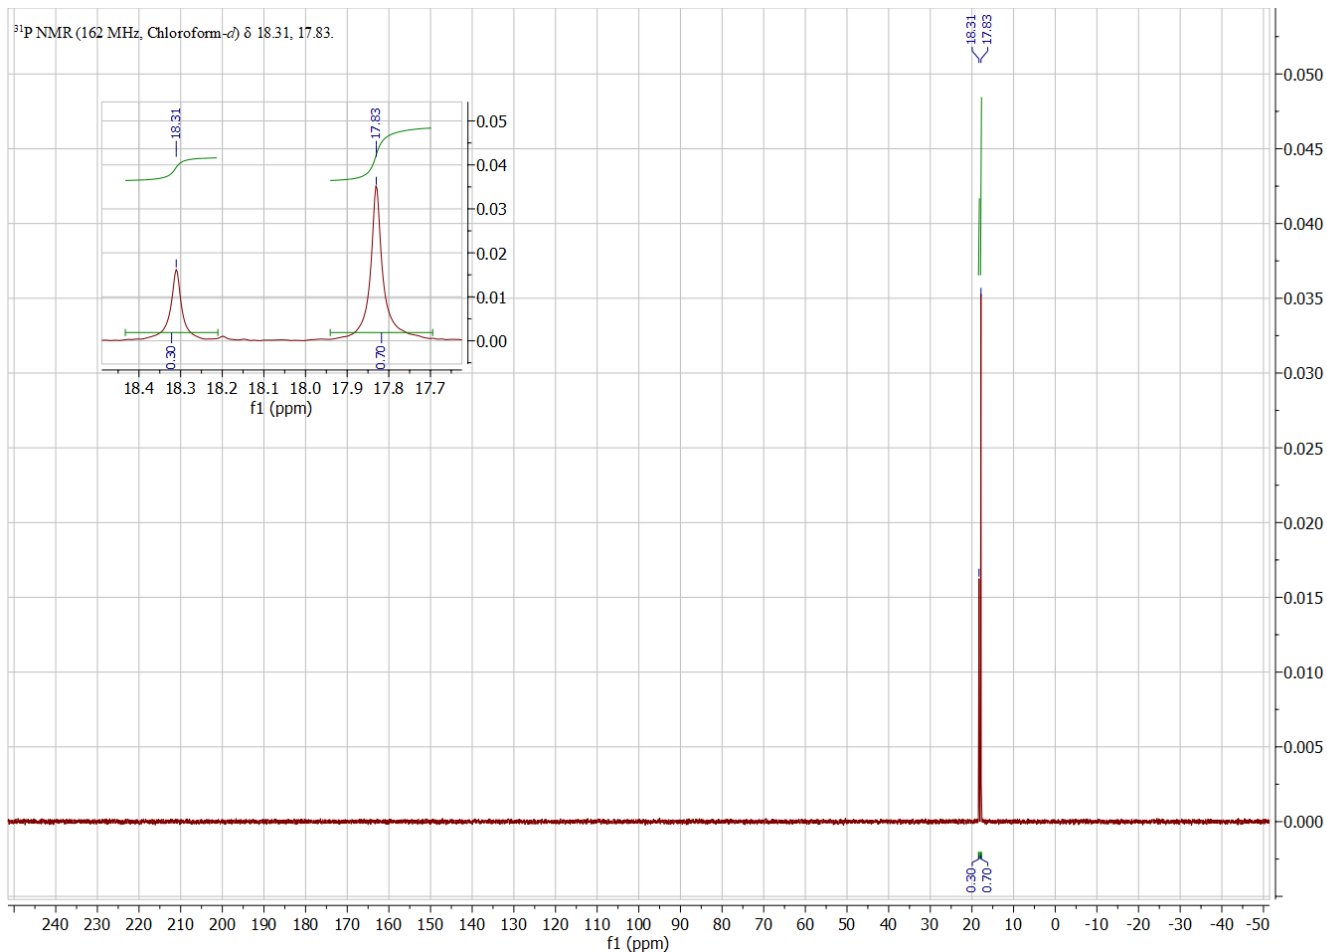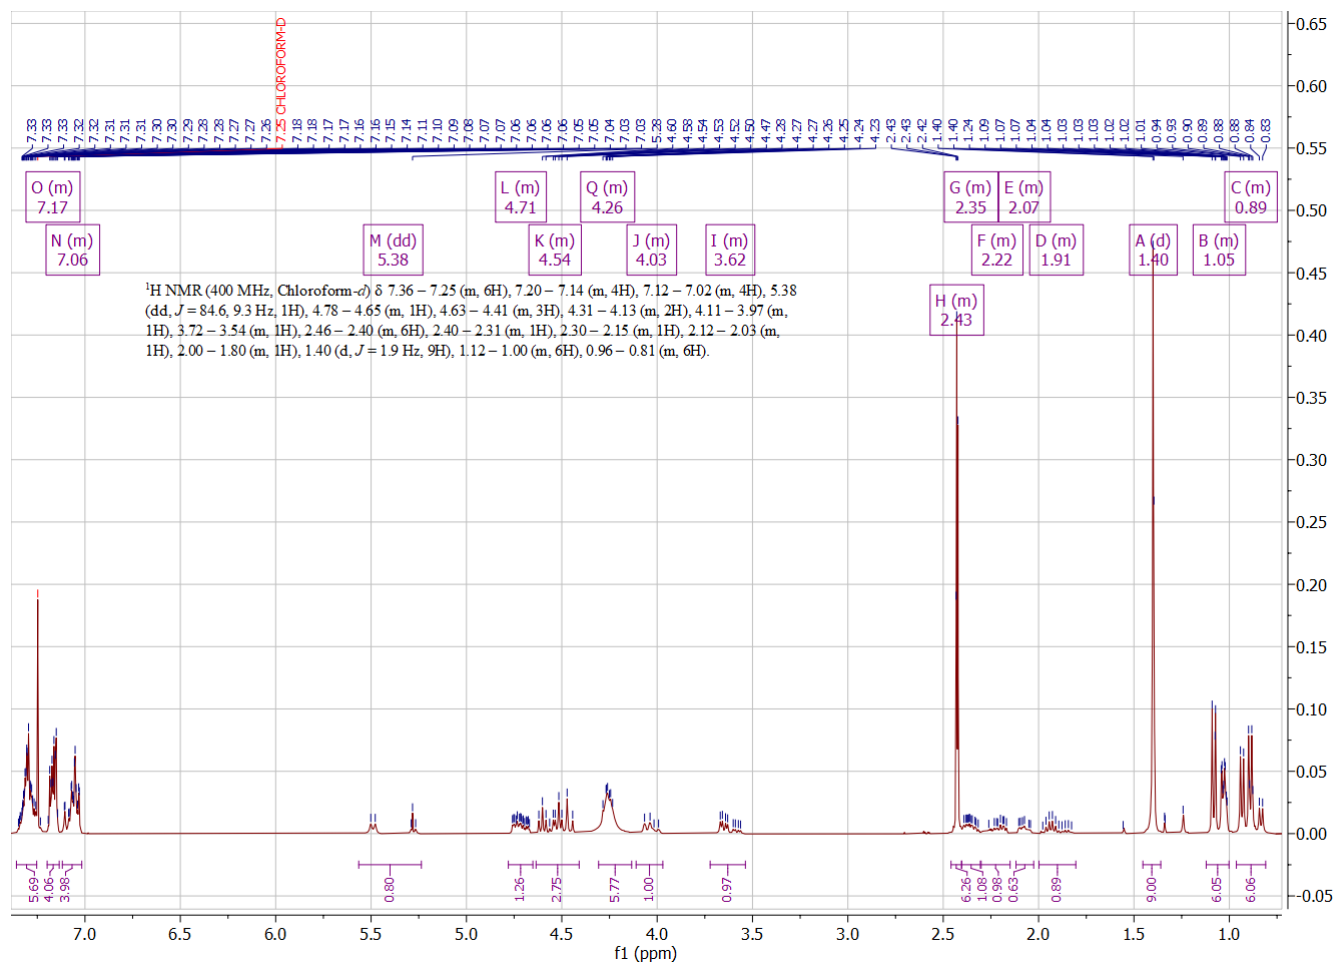

**(55) Boc-Gly-L-Pro-Val<sup>P</sup>(OPh-4-SCH<sub>3</sub>)<sub>2</sub>**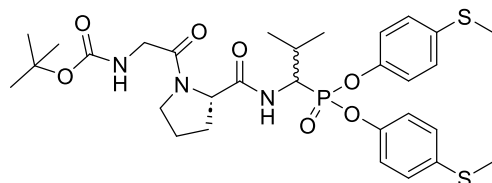

**Name:** *tert*-butyl (2-((2*S*)-2-((1-(bis(4-(methylthio)phenoxy)phosphoryl)-2-methylpropyl)carbamoyl)pyrrolidin-1-yl)-2-oxoethyl)carbamate

<sup>31</sup>P NMR (162 MHz, Chloroform-*d*) δ 18.38 (s, 63%), 18.11 (s, 37%).

<sup>1</sup>H NMR (400 MHz, Chloroform-*d*) δ 7.48 (dd, *J* = 113.1, 10.3 Hz, 1H, NH), 7.22 – 6.98 (m, 8H, 8xArH), 5.38 (d, *J* = 21.3 Hz, 1H, NH), 4.75 – 4.46 (m, 2H, CH<sub>2</sub>), 4.05 – 3.84 (m, 1H, CHP), 3.78 – 3.21 (m, 3H, CH<sub>2</sub>, CH), 2.43 (d, *J* = 2.8 Hz, 6H, 2xSCH<sub>3</sub>), 2.41 – 2.21 (m, 2H, CH<sub>2</sub>), 2.18 – 1.78 (m, 3H, CH<sub>2</sub>, CH), 1.43 (s, 9H, Boc), 1.12 – 0.96 (m, 6H, 2xCH<sub>3</sub>).

**HRMS:** C<sub>30</sub>H<sub>42</sub>N<sub>3</sub>O<sub>7</sub>PS<sub>2</sub> [M+Na]<sup>+</sup> calc. 674.2099 found 674.2091

**HPLC:** purity >99%; retention time 17.170 and 17.377 min

**Chromatogram**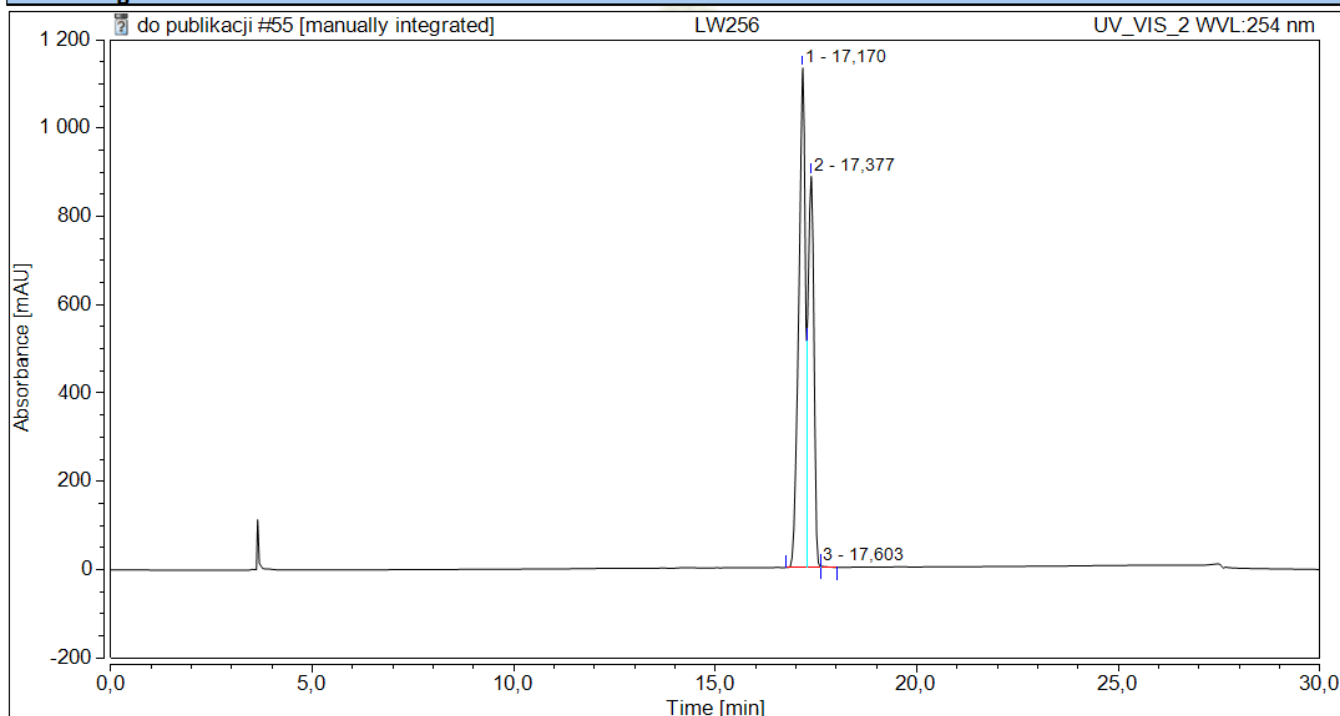**Integration Results**

| No.           | Peak Name | Retention Time<br>min | Area<br>mAU*min | Height<br>mAU   | Relative Area<br>% | Relative Height<br>% | Amount<br>n.a. |
|---------------|-----------|-----------------------|-----------------|-----------------|--------------------|----------------------|----------------|
| 1             |           | 17,170                | 209,025         | 1131,362        | 57,83              | 56,02                | n.a.           |
| 2             |           | 17,377                | 152,080         | 886,066         | 42,07              | 43,87                | n.a.           |
| 3             |           | 17,603                | 0,349           | 2,116           | 0,10               | 0,10                 | n.a.           |
| <b>Total:</b> |           |                       | <b>361,453</b>  | <b>2019,545</b> | <b>100,00</b>      | <b>100,00</b>        |                |



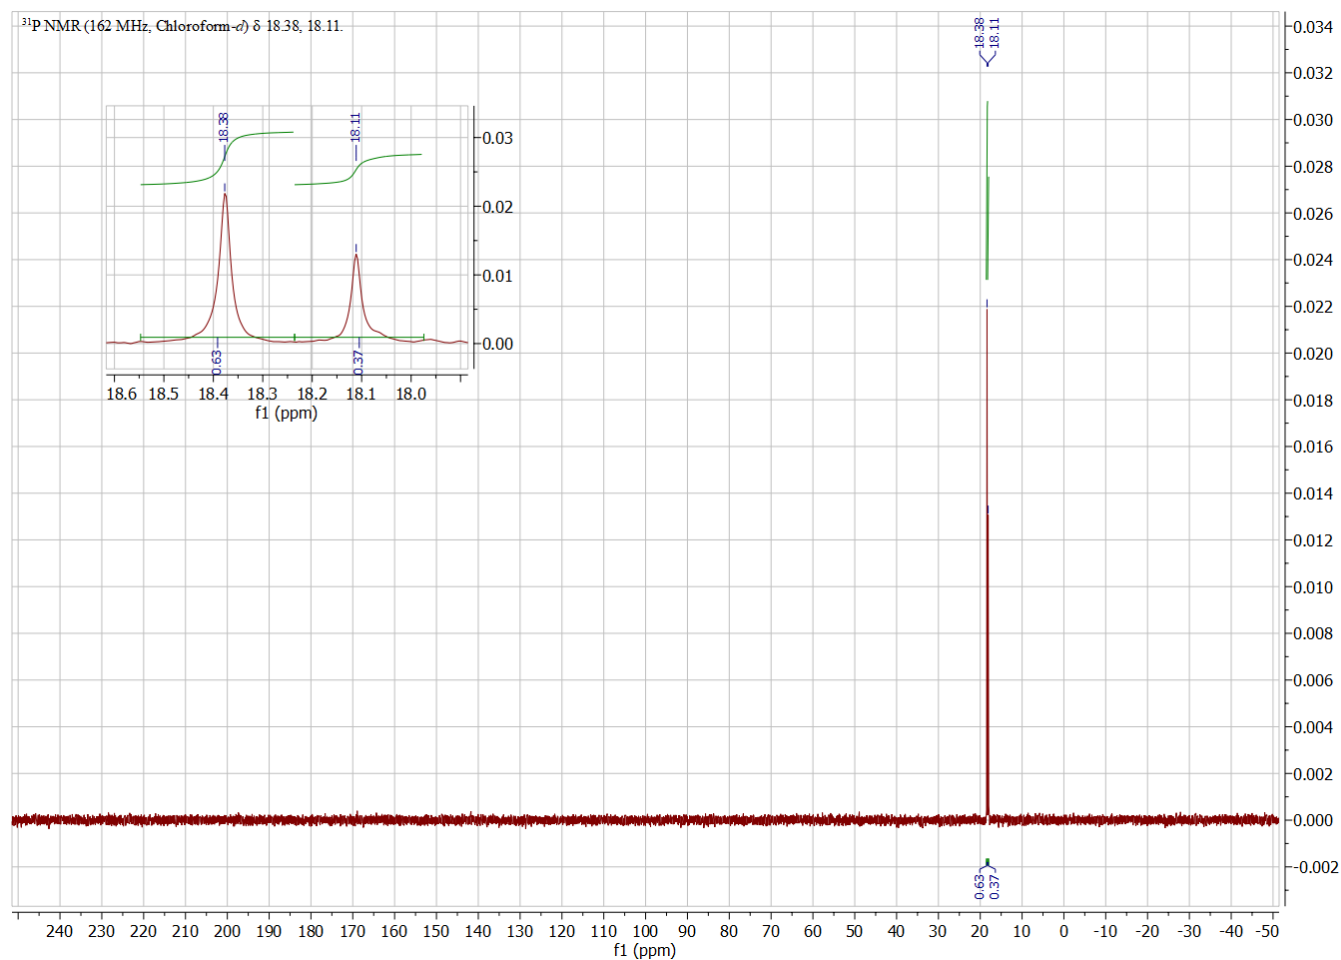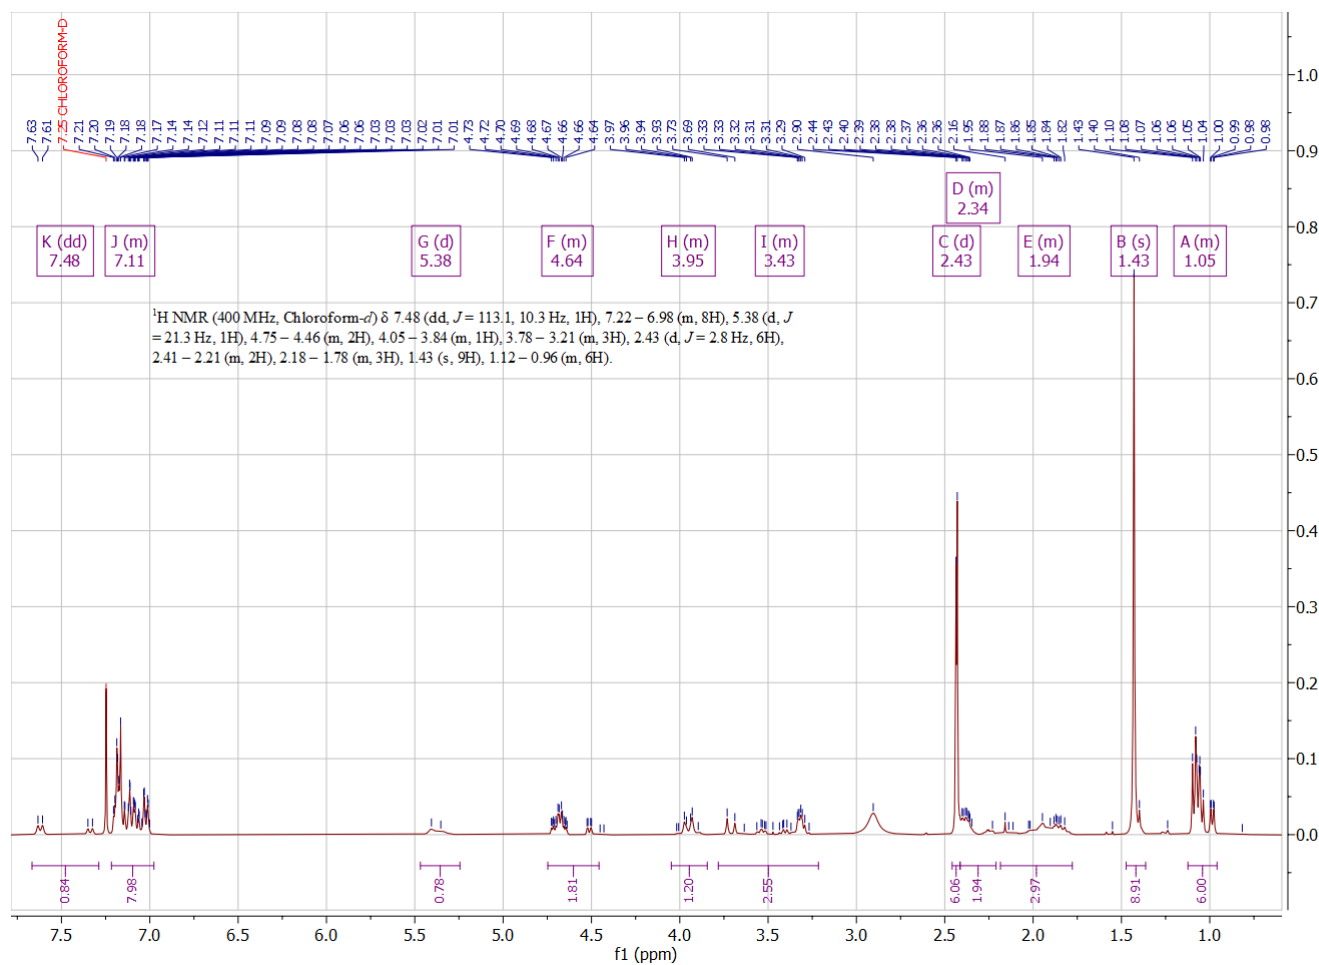

**(56) Boc-L-Ala-L-Pro-Val<sup>P</sup>(OPh-4-SCH<sub>3</sub>)<sub>2</sub>**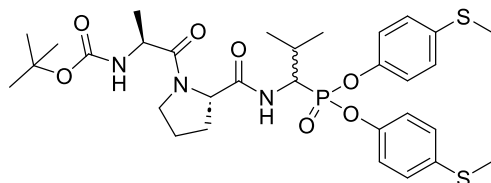

**Name:** *tert*-butyl ((2*S*)-1-((2*S*)-2-((1-(bis(4-(methylthio)phenoxy)phosphoryl)-2-methylpropyl)carbamoyl)pyrrolidin-1-yl)-1-oxopropan-2-yl)carbamate

<sup>31</sup>P NMR (162 MHz, Chloroform-*d*) δ 18.31 (s, 54%), 17.97 (s, 46%).

<sup>1</sup>H NMR (400 MHz, Chloroform-*d*) δ 7.43 (t, *J* = 11.4 Hz, 1H, NH), 7.23 – 7.14 (m, 4H, 4xArH), 7.14 – 7.00 (m, 4H, 4xArH), 5.40 (dd, *J* = 37.1, 8.1 Hz, 1H, NH), 4.77 – 4.53 (m, 2H, CHP, CH), 4.53 – 4.35 (m, 1H, CH), 3.73 – 3.59 (m, 1H, 0.5xCH<sub>2</sub>), 3.59 – 3.39 (m, 1H, 0.5xCH<sub>2</sub>), 2.47 – 2.42 (m, 6H, 2xSCH<sub>3</sub>), 2.42 – 2.16 (m, 2H, CH<sub>2</sub>), 2.17 – 1.77 (m, 3H, CH<sub>2</sub>, CH), 1.41 (d, *J* = 3.0 Hz, 9H, Boc), 1.23 (dd, *J* = 66.2, 6.9 Hz, 3H, CH<sub>3</sub>), 1.10 – 0.93 (m, 6H, 3xCH<sub>3</sub>).

**HRMS:** C<sub>31</sub>H<sub>44</sub>N<sub>3</sub>O<sub>7</sub>PS<sub>2</sub> [M+Na]<sup>+</sup> calc. 688.2256 found 688.2241

**HPLC:** purity >99%; retention time 17.490 and 17.807 min

**Chromatogram**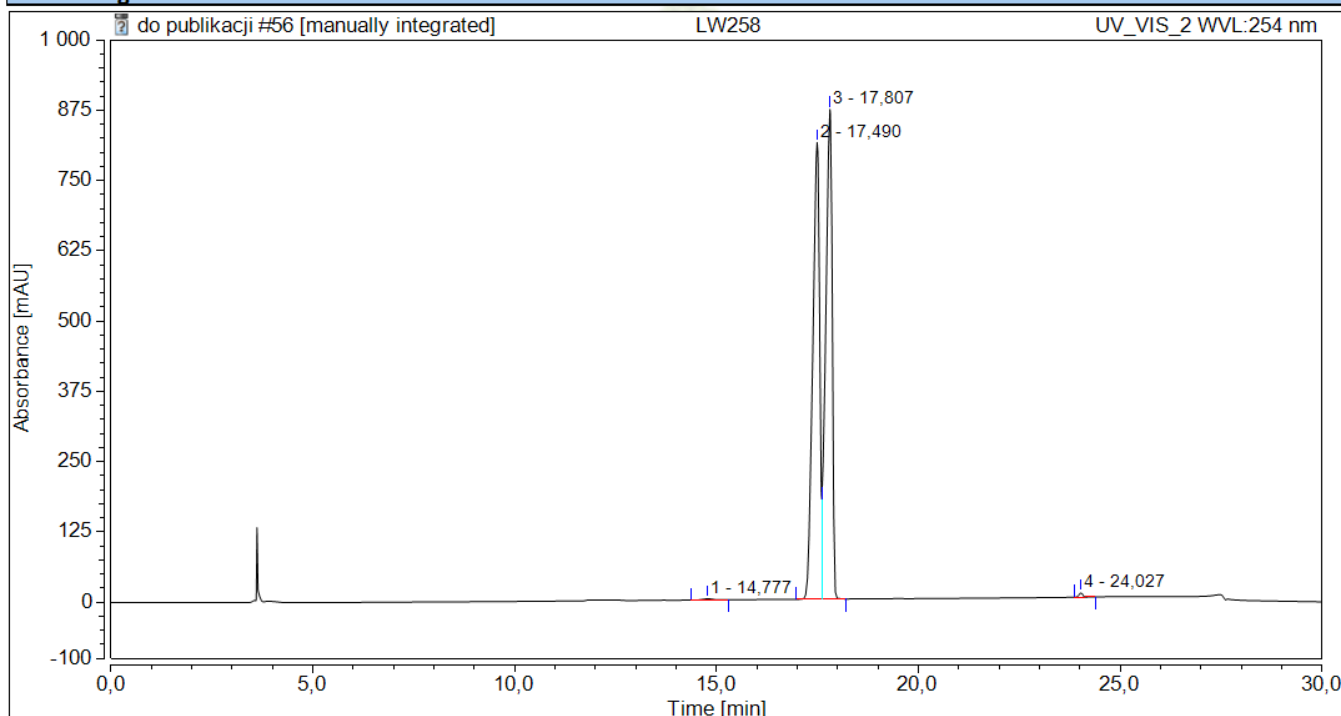**Integration Results**

| No.           | Peak Name | Retention Time<br>min | Area<br>mAU*min | Height<br>mAU   | Relative Area<br>% | Relative Height<br>% | Amount<br>n.a. |
|---------------|-----------|-----------------------|-----------------|-----------------|--------------------|----------------------|----------------|
| 1             |           | 14,777                | 0,630           | 2,121           | 0,19               | 0,13                 | n.a.           |
| 2             |           | 17,490                | 159,743         | 812,195         | 49,26              | 47,97                | n.a.           |
| 3             |           | 17,807                | 163,058         | 870,795         | 50,28              | 51,43                | n.a.           |
| 4             |           | 24,027                | 0,861           | 7,912           | 0,27               | 0,47                 | n.a.           |
| <b>Total:</b> |           |                       | <b>324,292</b>  | <b>1693,023</b> | <b>100,00</b>      | <b>100,00</b>        |                |

$^{31}\text{P}$  NMR (162 MHz, Chloroform- $d$ )  $\delta$  18.31, 17.97.

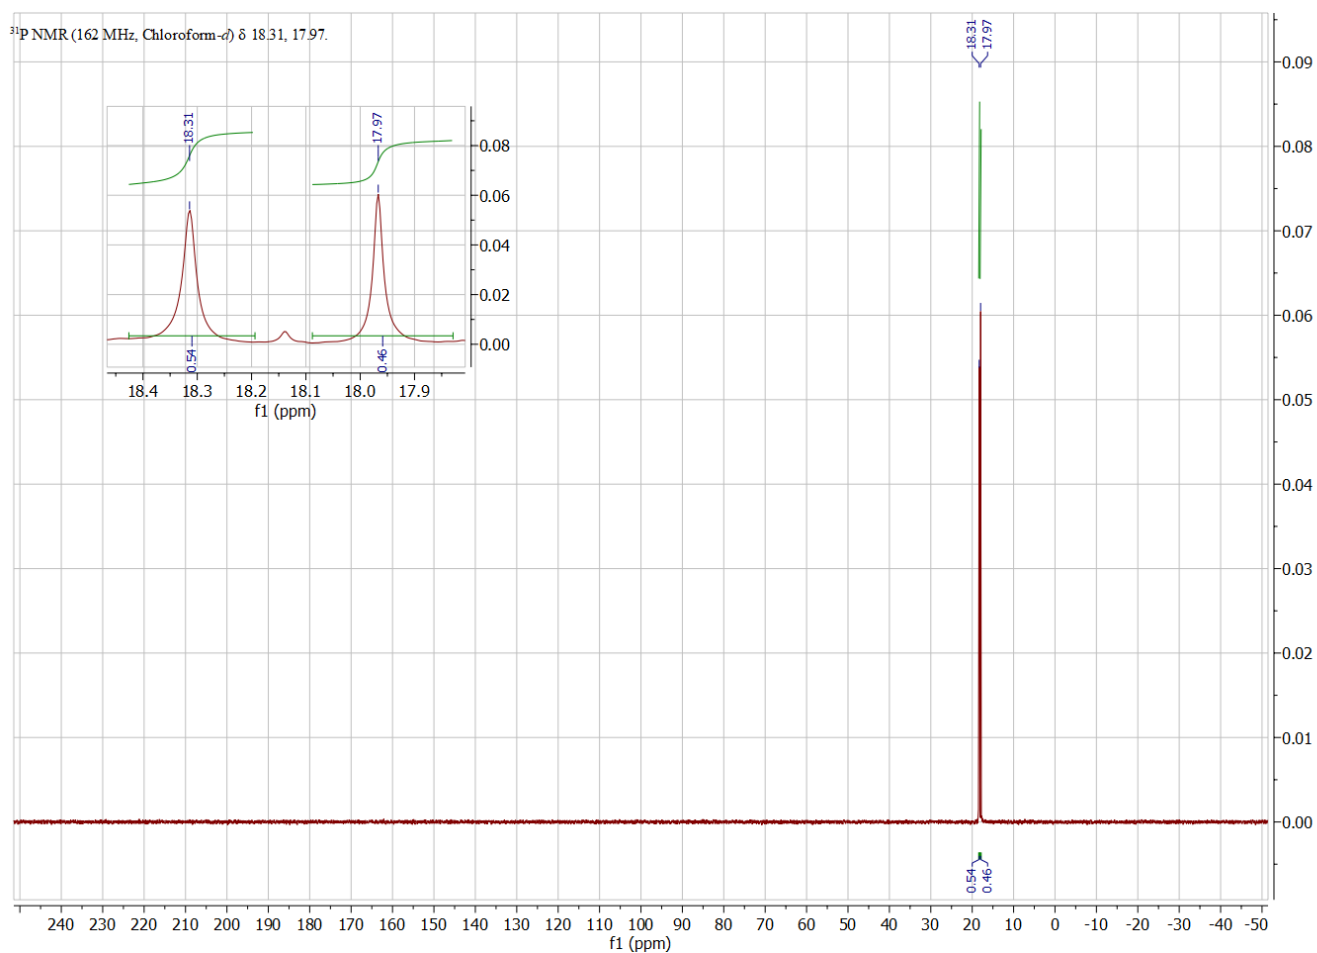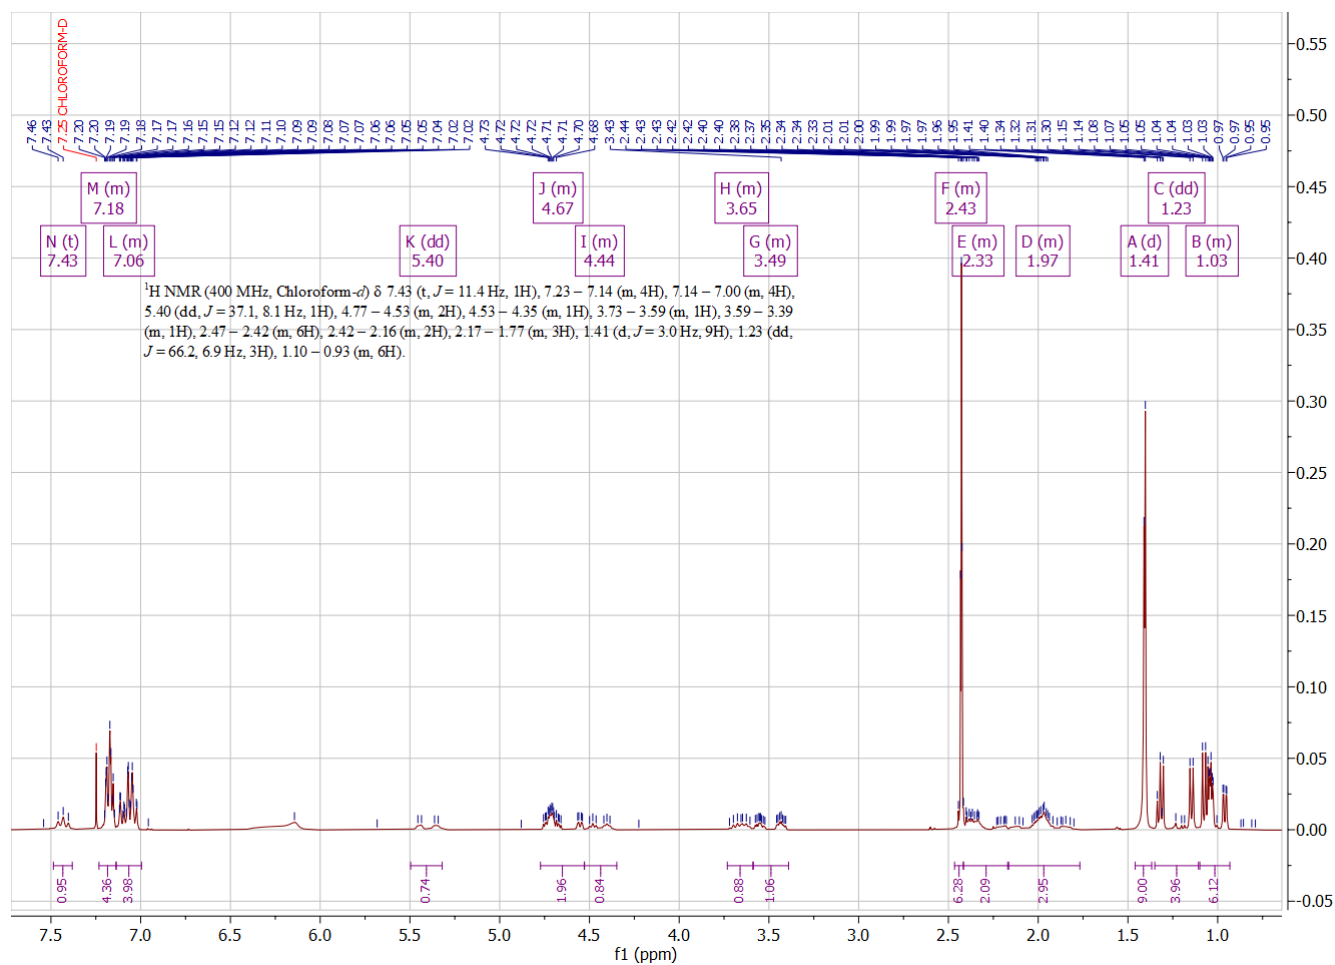

**(57) Boc-D-Ala-L-Pro-Val<sup>P</sup>(OPh-4-SCH<sub>3</sub>)<sub>2</sub>**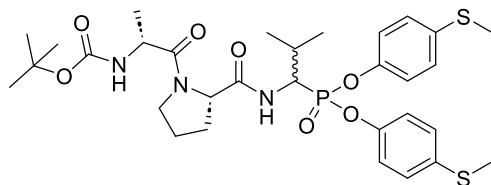

**Name:** *tert*-butyl ((2*R*)-1-((2*S*)-2-((1-(bis(4-(methylthio)phenoxy)phosphoryl)-2-methylpropyl)carbamoyl)pyrrolidin-1-yl)-1-oxopropan-2-yl)carbamate

<sup>31</sup>P NMR (162 MHz, Chloroform-*d*) δ 18.57 (s, 67%), 18.25 (s, 33%).

<sup>1</sup>H NMR (400 MHz, Chloroform-*d*) δ 7.53 (dd, *J* = 43.1, 10.3 Hz, 1H, NH), 7.22 – 7.10 (m, 6H, 6xArH), 7.10 – 6.97 (m, 2H, 2xArH), 5.37 – 5.27 (m, 1H, NH), 4.72 – 4.49 (m, 2H, CHP, CH), 4.49 – 4.30 (m, 1H, CH), 3.85 – 3.59 (m, 1H, 0.5xCH<sub>2</sub>), 3.51 – 3.35 (m, 1H, 0.5xCH<sub>2</sub>), 2.43 (d, *J* = 4.7 Hz, 6H, 2xSCH<sub>3</sub>), 2.40 – 2.24 (m, 2H, CH<sub>2</sub>), 2.15 – 1.75 (m, 3H, CH<sub>2</sub>, CH), 1.46 – 1.26 (m, 12H, Boc, CH<sub>3</sub>), 1.12 – 0.94 (m, 6H, 2xCH<sub>3</sub>).

**HRMS:** C<sub>31</sub>H<sub>44</sub>N<sub>3</sub>O<sub>7</sub>PS<sub>2</sub> [M+Na]<sup>+</sup> calc. 688.2256 found 688.2244

**HPLC:** purity >99%; retention time 17.693 min

**Chromatogram**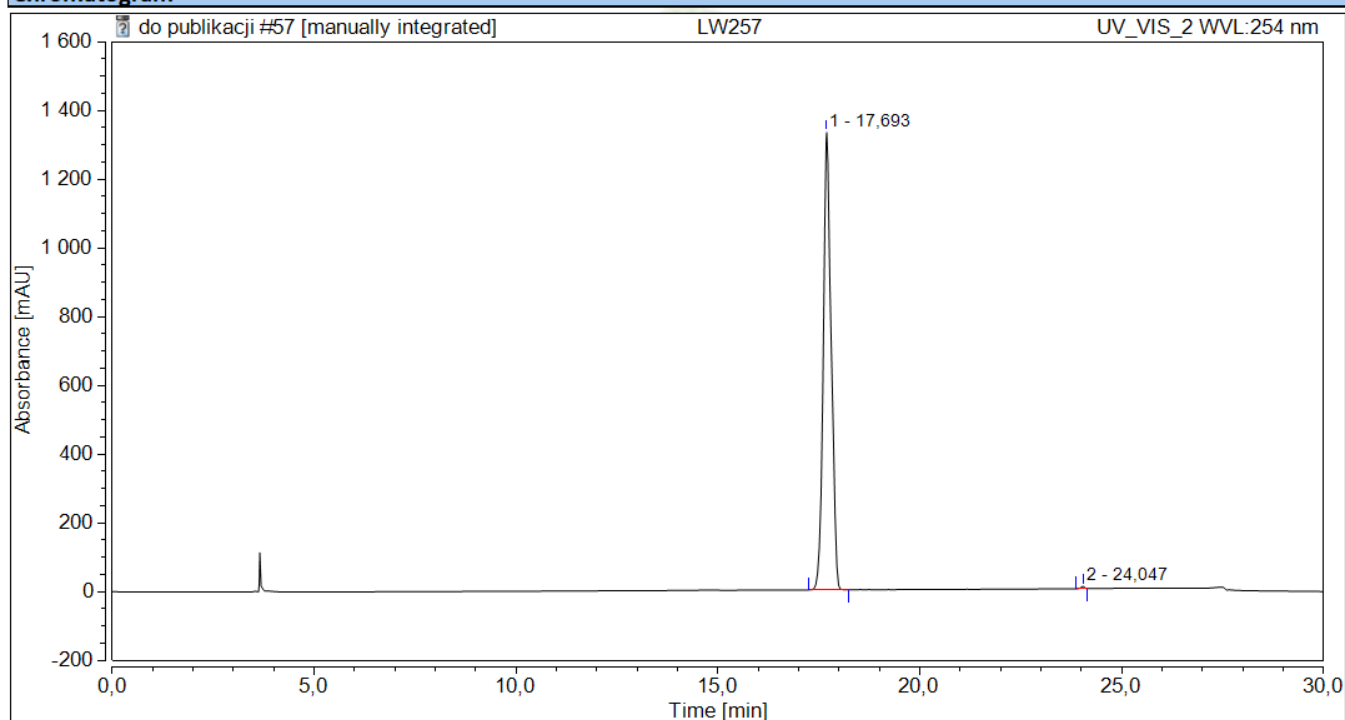**Integration Results**

| No.           | Peak Name | Retention Time<br>min | Area<br>mAU*min | Height<br>mAU   | Relative Area<br>% | Relative Height<br>% | Amount |
|---------------|-----------|-----------------------|-----------------|-----------------|--------------------|----------------------|--------|
| 1             |           | 17,693                | 300,297         | 1330,908        | 99,76              | 99,45                | n.a.   |
| 2             |           | 24,047                | 0,710           | 7,375           | 0,24               | 0,55                 | n.a.   |
| <b>Total:</b> |           |                       | <b>301,007</b>  | <b>1338,283</b> | <b>100,00</b>      | <b>100,00</b>        |        |

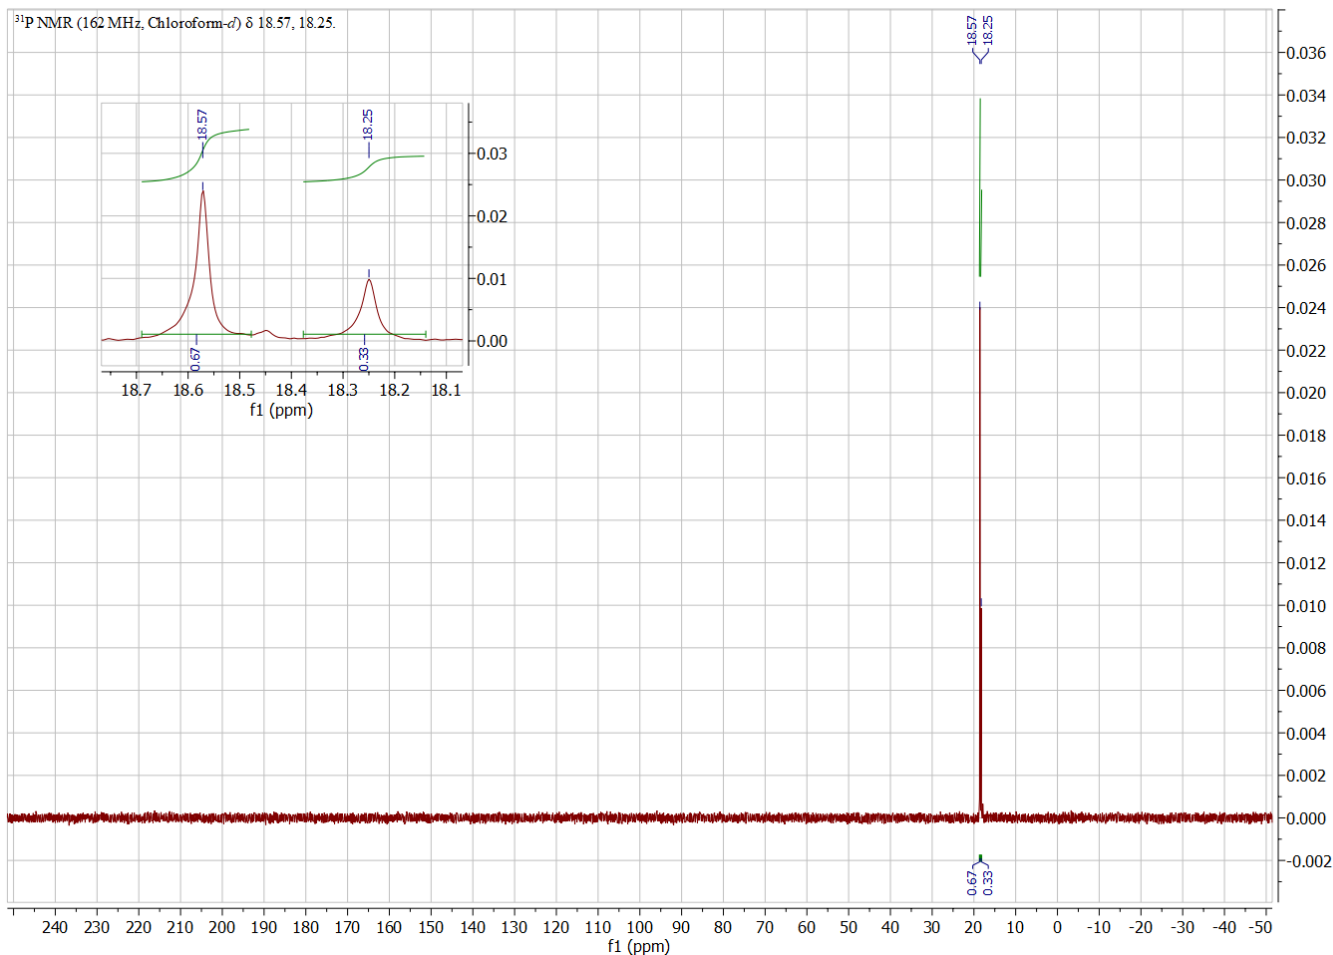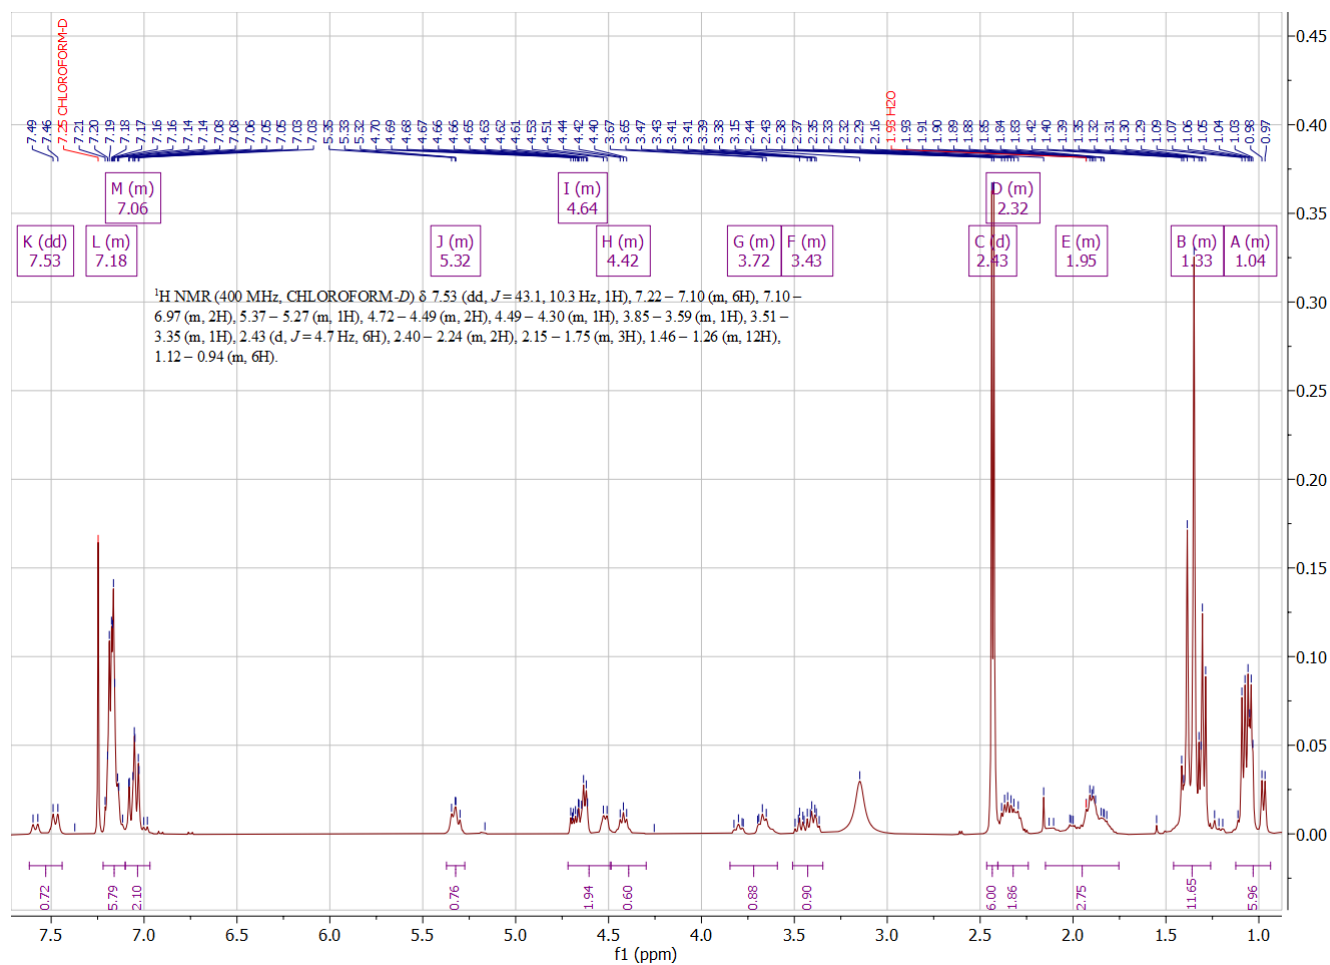

**(58) Boc-Aib-L-Pro- Val<sup>P</sup>(OPh-4-SCH<sub>3</sub>)<sub>2</sub>**

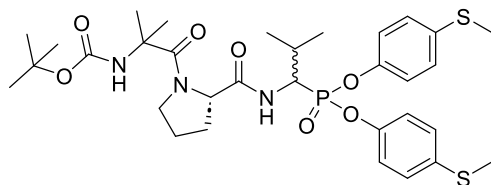

**Name:** tert-butyl (1-((2*S*)-2-((1-(bis(4-(methylthio)phenoxy)phosphoryl)-2-methylpropyl)carbamoyl)pyrrolidin-1-yl)-2-methyl-1-oxopropan-2-yl)carbamate

**<sup>31</sup>P NMR** (162 MHz, Chloroform-*d*) δ 19.13 (s). **<sup>1</sup>H NMR**

(400 MHz, Chloroform-*d*) δ 7.71 (d, *J* = 9.6 Hz, 1H, NH), 7.21 – 7.12 (m, 4H, 4xArH), 7.10 – 6.99 (m, 4H, 4xArH), 4.79 (s, 1H, NH), 4.74 – 4.56 (m, 2H, CHP, CH), 3.84 – 3.73 (m, 1H, 0.5xCH<sub>2</sub>), 3.52 – 3.41 (m, 1H, 0.5xCH<sub>2</sub>), 2.48 – 2.37 (m, 7H, 2xSCH<sub>3</sub>, CH), 2.26 – 2.14 (m, 1H, 0.5xCH<sub>2</sub>), 1.92 – 1.65 (m, 3H, 1.5xCH<sub>2</sub>), 1.50 (s, 3H, CH<sub>3</sub>), 1.38 (s, 3H, CH<sub>3</sub>), 1.35 (s, 9H, Boc), 1.16 (dd, *J* = 10.5, 6.8 Hz, 6H, 2xCH<sub>3</sub>).

**HRMS:** C<sub>32</sub>H<sub>46</sub>N<sub>3</sub>O<sub>7</sub>PS<sub>2</sub> [M+Na]<sup>+</sup> calc. 702.2412 found 702.2403

**HPLC:** purity >99%; retention time 18.090 and 18.357 min

**Chromatogram**

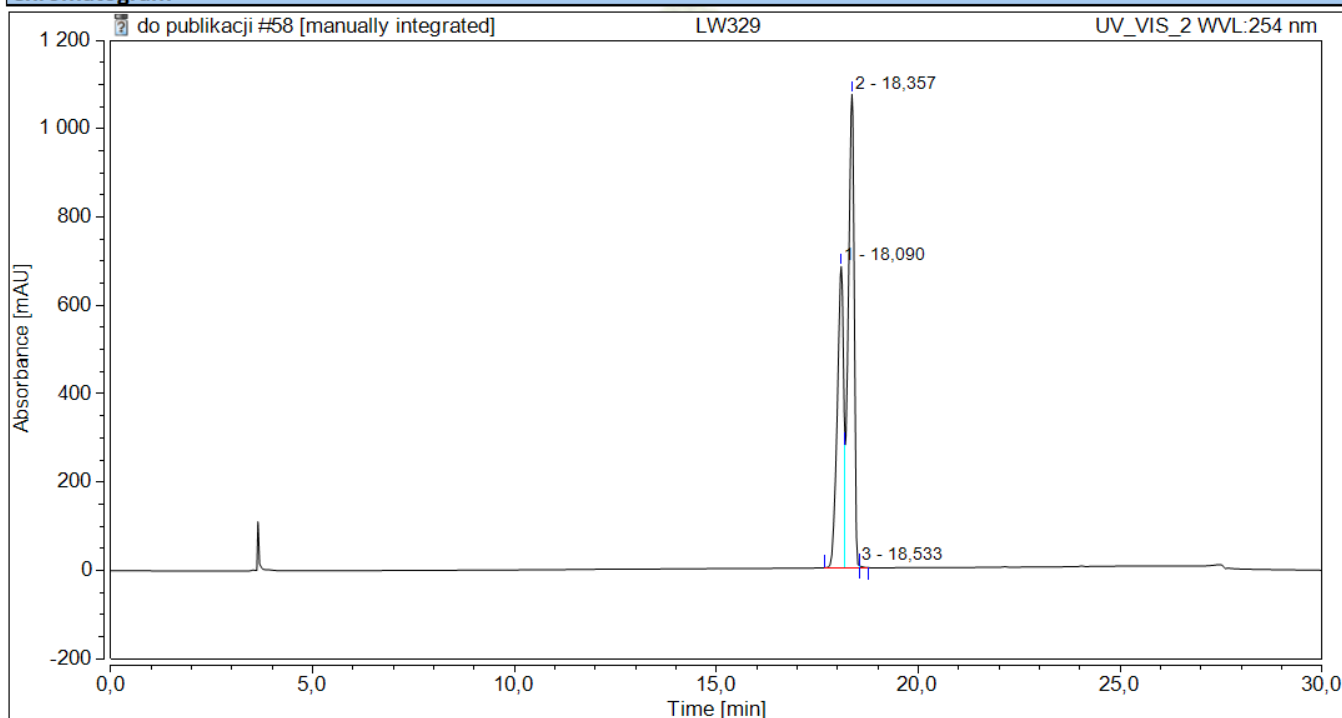

**Integration Results**

| No.           | Peak Name | Retention Time<br>min | Area<br>mAU*min | Height<br>mAU   | Relative Area<br>% | Relative Height<br>% | Amount<br>n.a. |
|---------------|-----------|-----------------------|-----------------|-----------------|--------------------|----------------------|----------------|
| 1             |           | 18,090                | 125,510         | 682,107         | 41,05              | 38,81                | n.a.           |
| 2             |           | 18,357                | 179,879         | 1071,643        | 58,84              | 60,97                | n.a.           |
| 3             |           | 18,533                | 0,343           | 3,934           | 0,11               | 0,22                 | n.a.           |
| <b>Total:</b> |           |                       | <b>305,732</b>  | <b>1757,685</b> | <b>100,00</b>      | <b>100,00</b>        |                |



**(59) Boc-AC3C-L-Pro- Val<sup>P</sup>(OPh-4-SCH<sub>3</sub>)<sub>2</sub>**

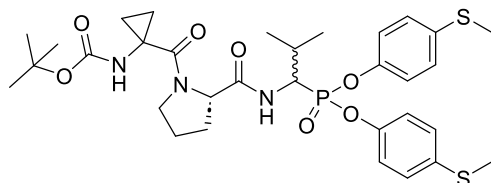

**Name:** *tert*-butyl (1-((2*S*)-2-((1-(bis(4-(methylthio)phenoxy)phosphoryl)-2-methylpropyl)carbamoyl)pyrrolidine-1-carbonyl)cyclopropyl)carbamate

<sup>31</sup>P NMR (162 MHz, Chloroform-*d*) δ 18.71 (s, 75%), 18.27 (s, 25%).

<sup>1</sup>H NMR (400 MHz, Chloroform-*d*) δ 7.50 (d, *J* = 10.1 Hz, 1, NH), 7.21 – 7.01 (m, 8H, 8xArH), 5.10 (s, 1H, NH), 4.76 – 4.60 (m, 2H, CHP, CH), 3.79 – 3.56 (m, 2H, CH<sub>2</sub>), 2.43 (d, *J* = 3.4 Hz, 6H, 2xSCH<sub>3</sub>), 2.42 – 2.32 (m, 1H, CH), 2.21 – 1.94 (m, 2H, CH<sub>2</sub>), 1.96 – 1.58 (m, 3H, 1.5xCH<sub>2</sub>), 1.39 (d, *J* = 14.6 Hz, 9H, Boc), 1.34 – 1.23 (m, 1H, 0.5xCH<sub>2</sub>), 1.09 (dd, *J* = 17.9, 6.8 Hz, 6H, 3xCH<sub>3</sub>), 1.04 – 0.78 (m, 2H, CH<sub>2</sub>).

**HRMS:** C<sub>32</sub>H<sub>44</sub>N<sub>3</sub>O<sub>7</sub>PS<sub>2</sub> [M+Na]<sup>+</sup> calc. 700.2256 found 700.2229

**HPLC:** purity >99%; retention time 17.613 and 17.860 min

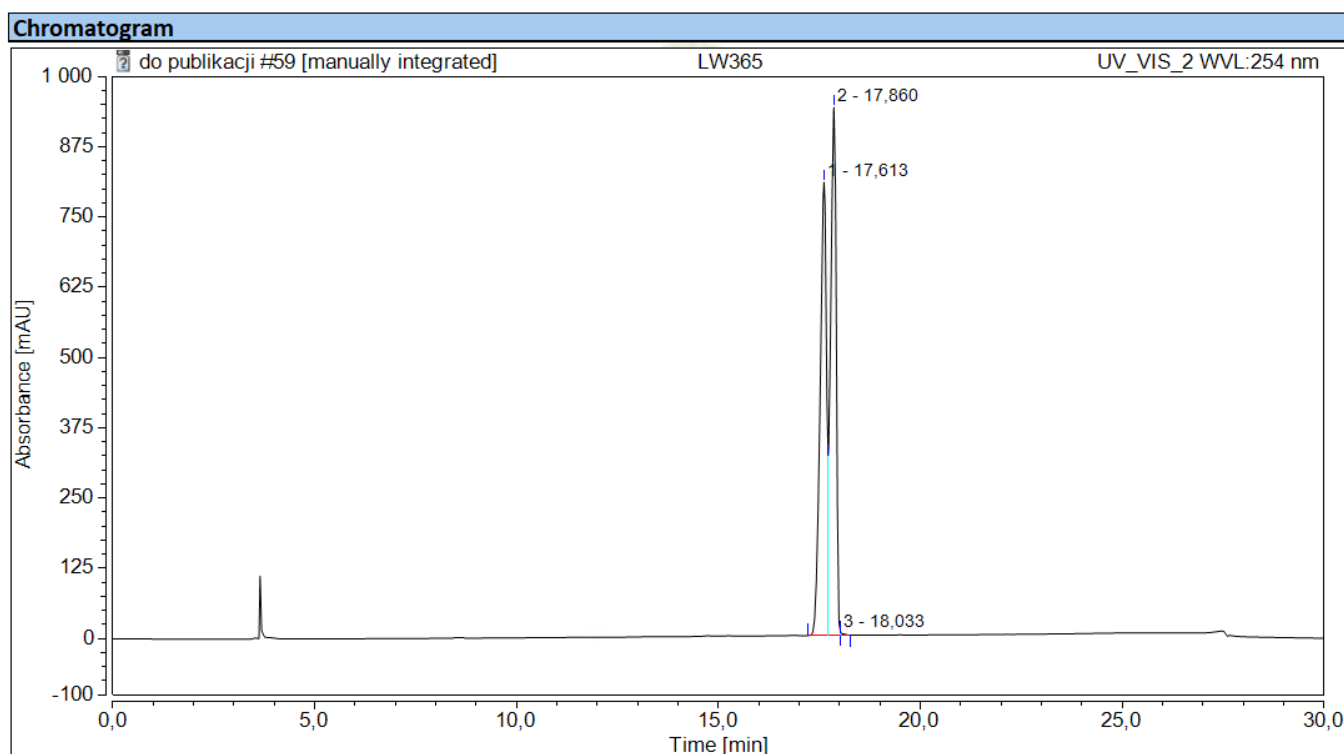

| Integration Results |           |                    |              |            |                 |                   |             |
|---------------------|-----------|--------------------|--------------|------------|-----------------|-------------------|-------------|
| No.                 | Peak Name | Retention Time min | Area mAU*min | Height mAU | Relative Area % | Relative Height % | Amount n.a. |
| 1                   |           | 17,613             | 147,528      | 806,259    | 49,03           | 46,09             | n.a.        |
| 2                   |           | 17,860             | 152,991      | 939,103    | 50,85           | 53,68             | n.a.        |
| 3                   |           | 18,033             | 0,365        | 4,110      | 0,12            | 0,23              | n.a.        |
| Total:              |           |                    | 300,885      | 1749,472   | 100,00          | 100,00            |             |



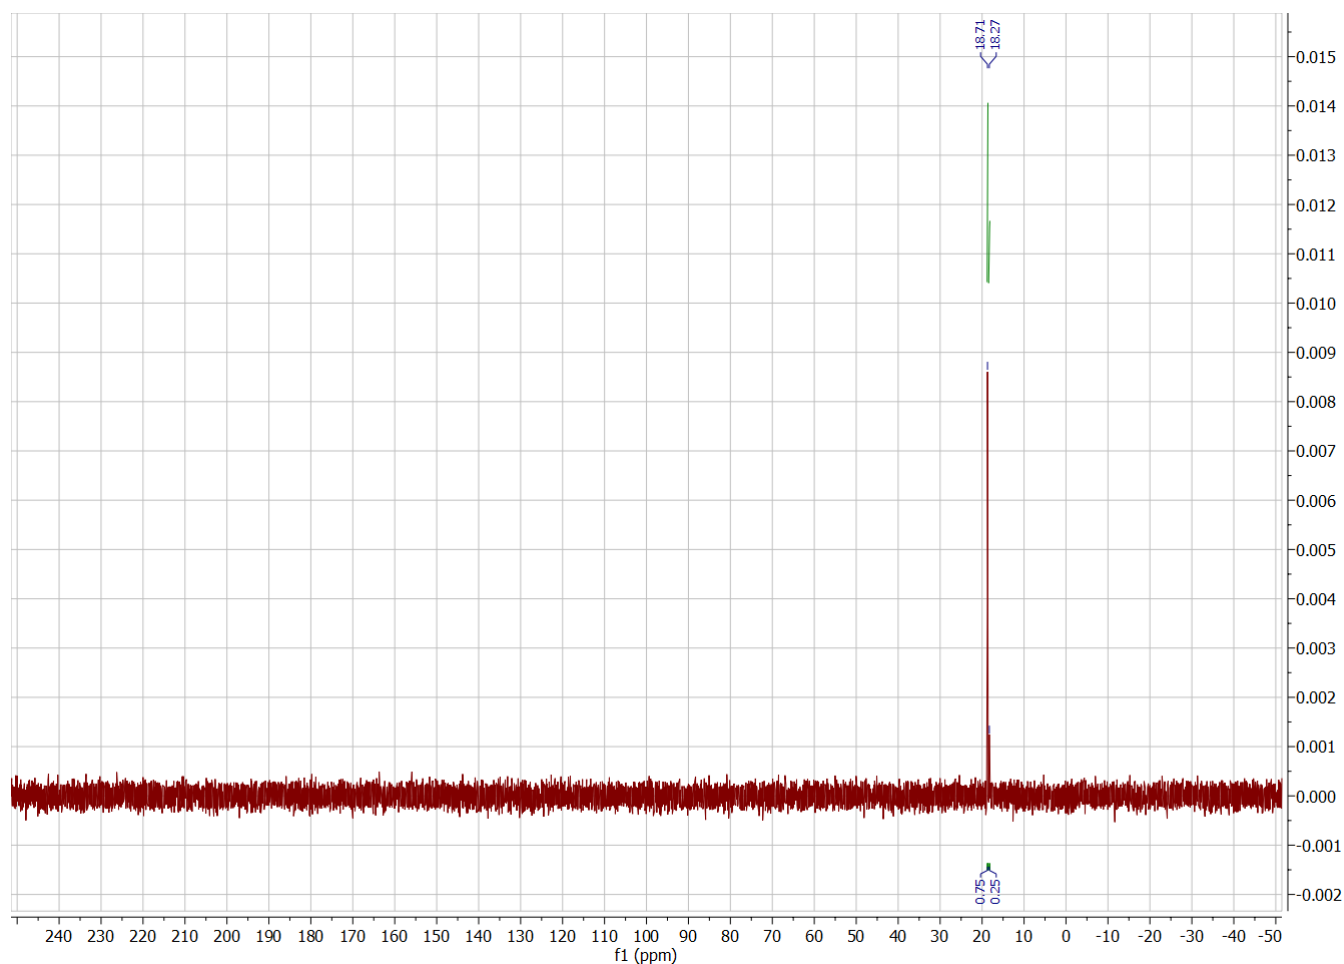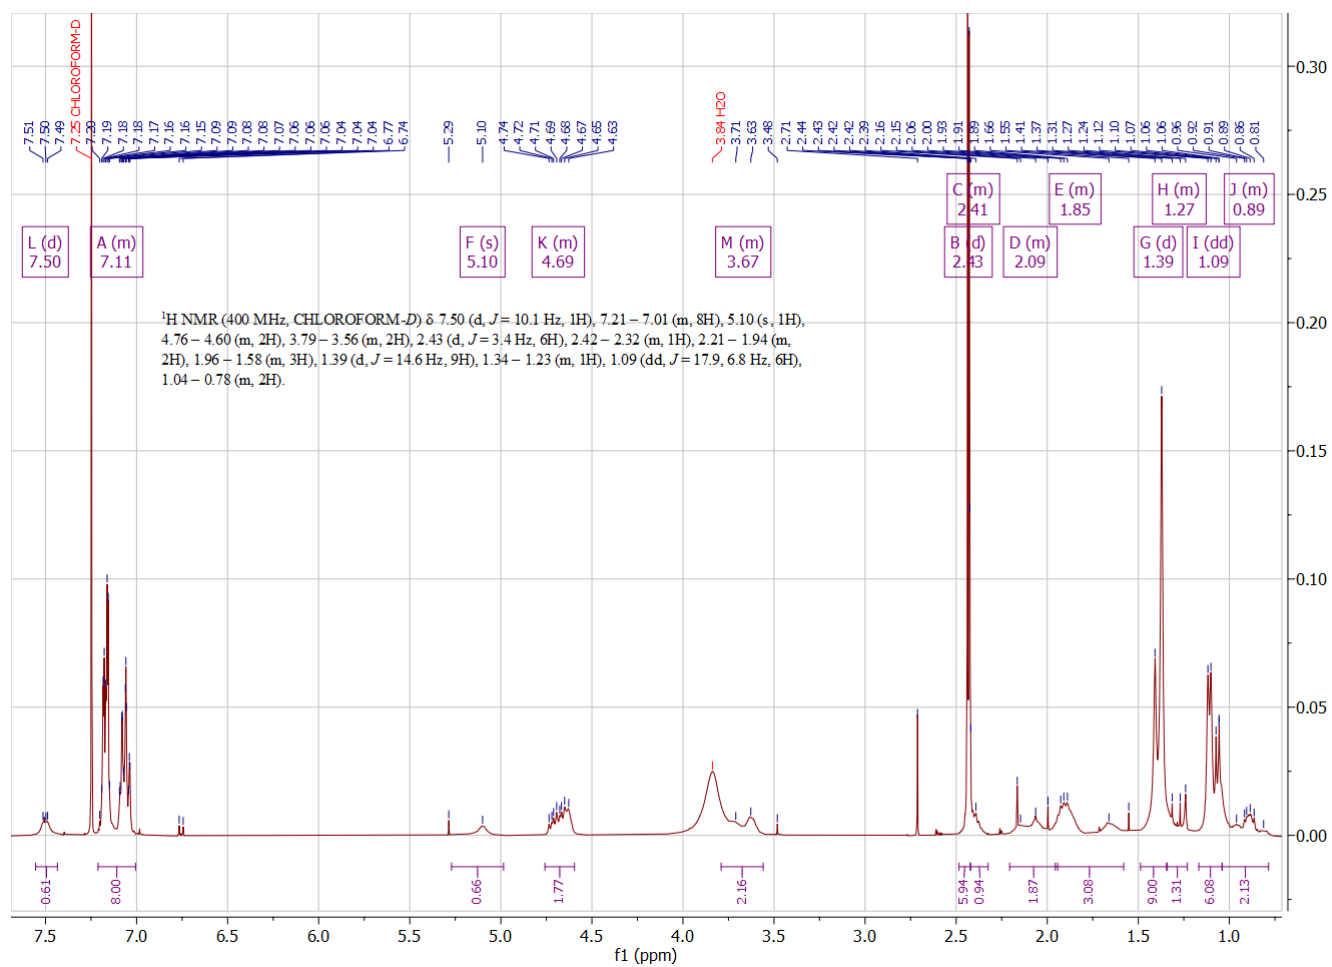

**(60) Boc-beta-Ala-L-Pro- Val<sup>P</sup>(OPh-4-SCH<sub>3</sub>)<sub>2</sub>**

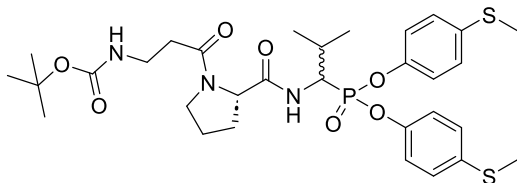

**Name:** *tert*-butyl (3-((2*S*)-2-((1-(bis(4-(methylthio)phenoxy)phosphoryl)-2-methylpropyl)carbamoyl)pyrrolidin-1-yl)-3-oxopropyl)carbamate

<sup>31</sup>P NMR (162 MHz, Chloroform-*d*) δ 18.18 (s, 51%), 18.04 (s, 49%).

<sup>1</sup>H NMR (400 MHz, Chloroform-*d*) δ 7.66 (dd, *J* = 101.1, 10.1 Hz, 1H, NH), 7.23 – 6.98 (m, 8H, 8xArH), 5.66 – 5.26 (m, 1H, NH), 4.78 – 4.66 (m, 1H, CHP), 4.66 – 4.50 (m, 1H, CH), 3.65 – 3.26 (m, 4H, 2xCH<sub>2</sub>), 2.62 – 2.46 (m, 1H, CH), 2.46 – 2.42 (m, 6H, 2xSCH<sub>3</sub>), 2.42 – 1.95 (m, 4H, 2xCH<sub>2</sub>), 1.95 – 1.78 (m, 2H, CH<sub>2</sub>), 1.39 (d, *J* = 10.6 Hz, 9H, Boc), 1.14 – 0.91 (m, 6H, 2xCH<sub>3</sub>).

**HRMS:** C<sub>31</sub>H<sub>44</sub>N<sub>3</sub>O<sub>7</sub>PS<sub>2</sub> [M+Na]<sup>+</sup> calc. 688.2256 found 688.2258

**HPLC:** purity >99%; retention time 17.330 and 17.627 min

**Chromatogram**

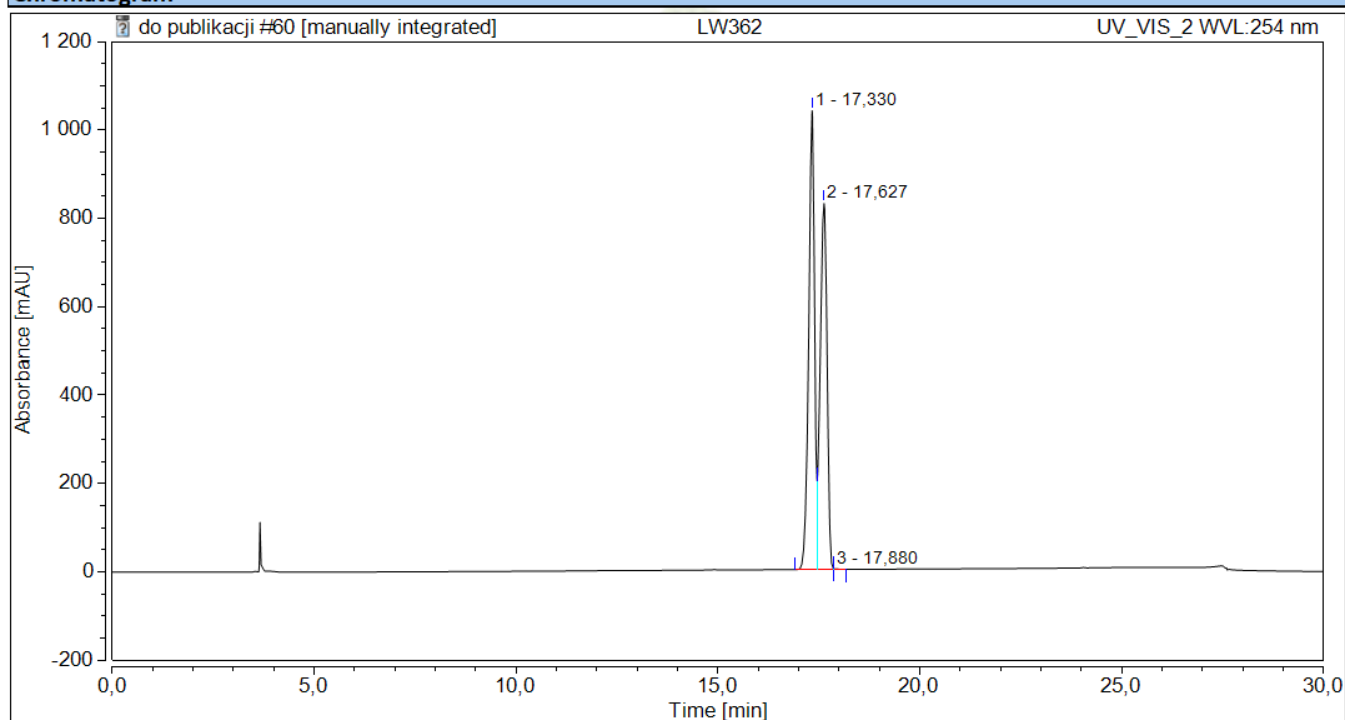

**Integration Results**

| No.           | Peak Name | Retention Time<br>min | Area<br>mAU*min | Height<br>mAU   | Relative Area<br>% | Relative Height<br>% | Amount |
|---------------|-----------|-----------------------|-----------------|-----------------|--------------------|----------------------|--------|
| 1             |           | 17,330                | 173,059         | 1038,616        | 51,36              | 55,59                | n.a.   |
| 2             |           | 17,627                | 163,741         | 828,615         | 48,60              | 44,35                | n.a.   |
| 3             |           | 17,880                | 0,128           | 1,199           | 0,04               | 0,06                 | n.a.   |
| <b>Total:</b> |           |                       | <b>336,928</b>  | <b>1868,431</b> | <b>100,00</b>      | <b>100,00</b>        |        |

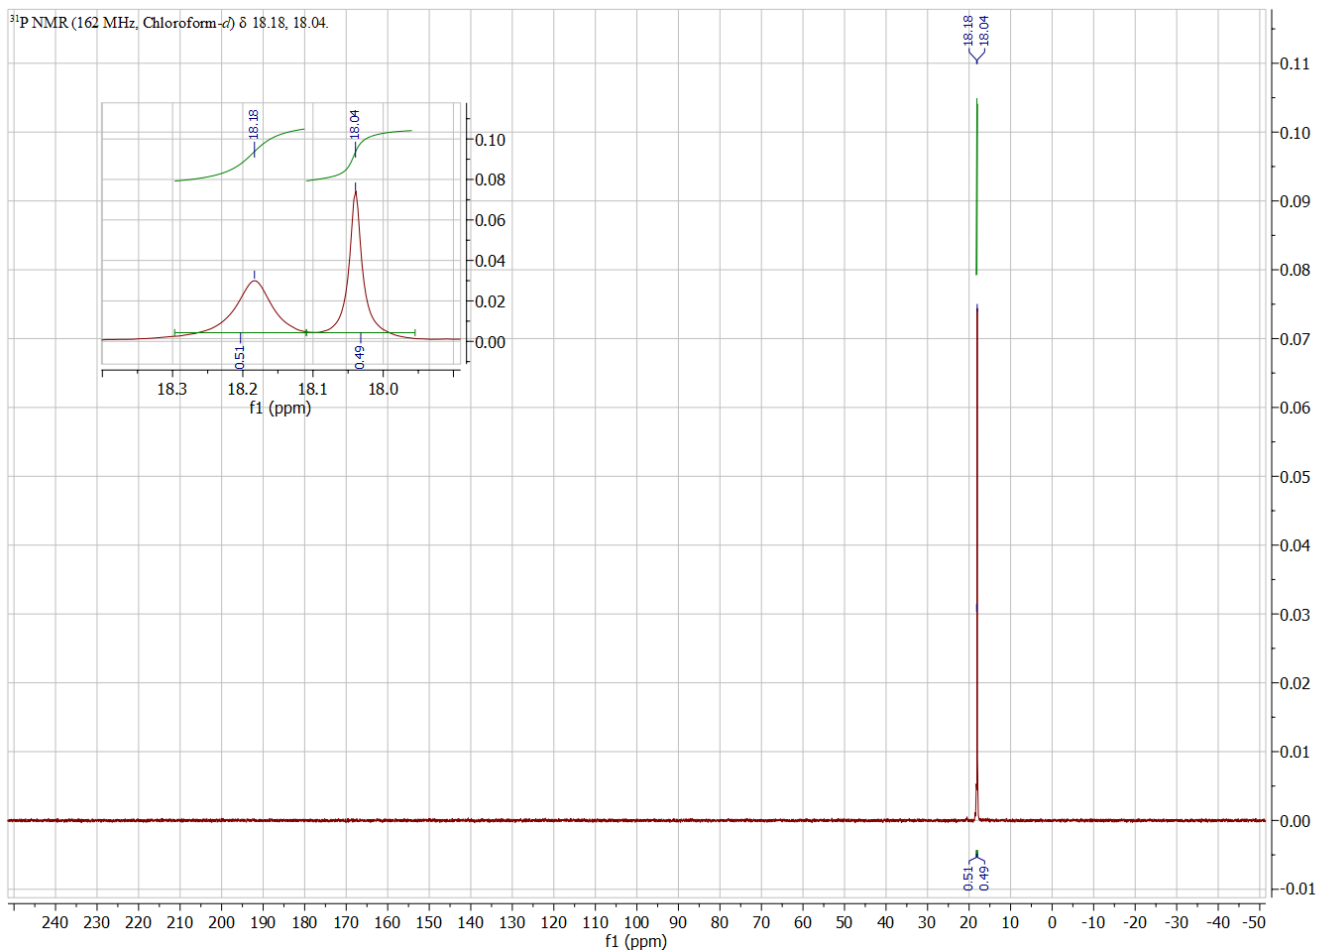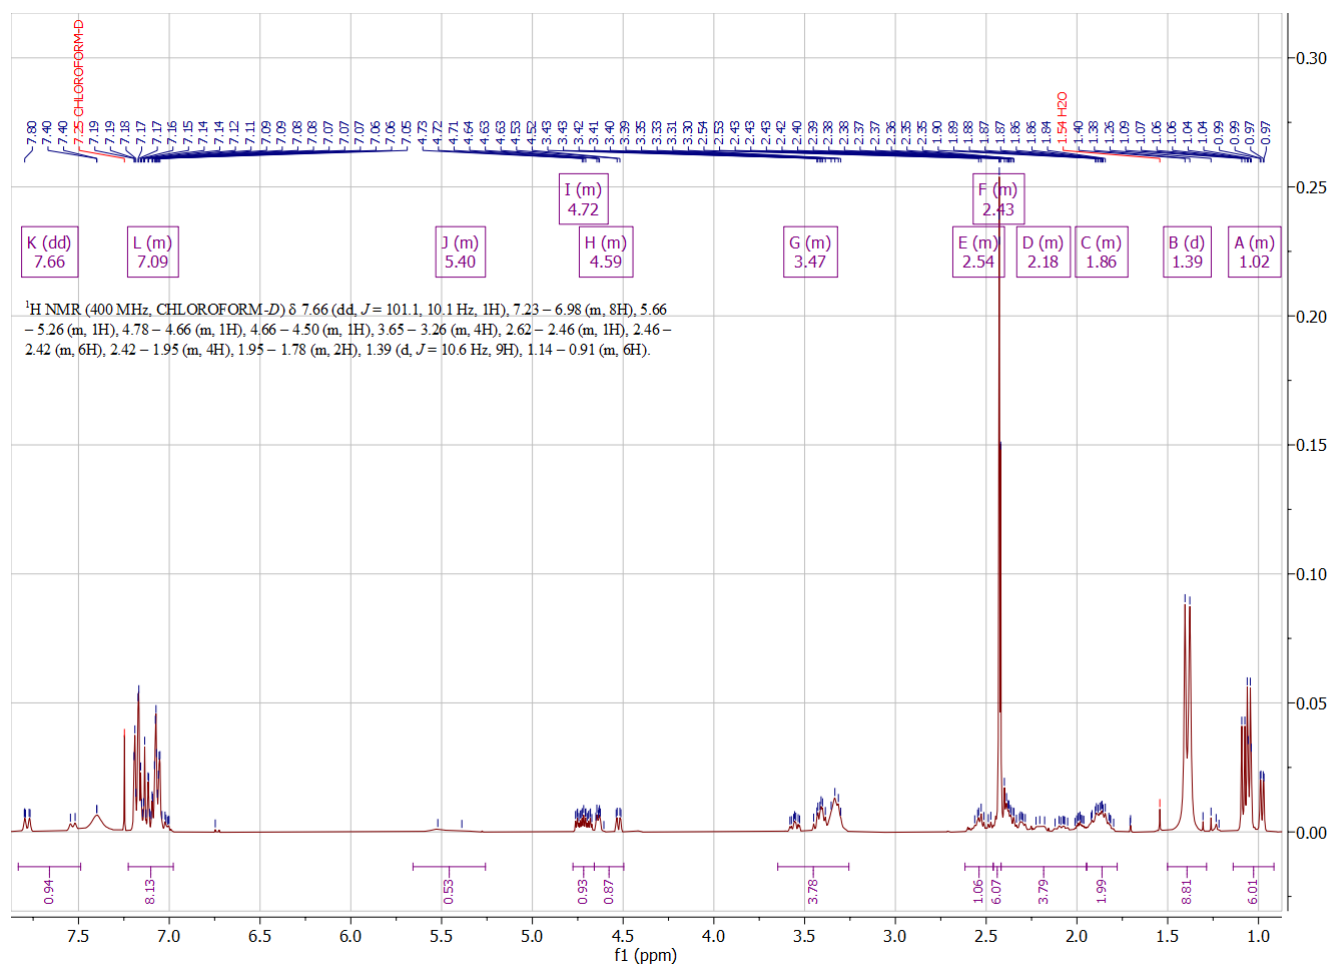

**(61) Boc-GABA-L-Pro-Val<sup>P</sup>(OPh-4-SCH<sub>3</sub>)<sub>2</sub>**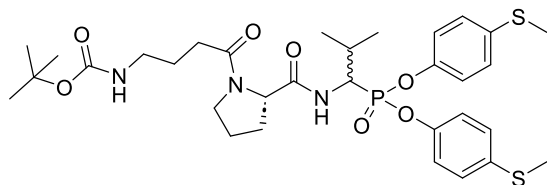

**Name:** *tert*-butyl (4-((2*S*)-2-((1-(bis(4-(methylthio)phenoxy)phosphoryl)-2-methylpropyl)carbamoyl)pyrrolidin-1-yl)-4-oxobutyl)carbamate

<sup>31</sup>P NMR (162 MHz, Chloroform-*d*) δ 18.44 (s, 73%), 18.25 (s, 27%).

<sup>1</sup>H NMR (400 MHz, Chloroform-*d*) δ 7.67 (dd, *J* = 95.8, 10.3 Hz, 1H, NH), 7.24 – 6.97 (m, 8H, 8xArH), 4.91 (s, 1H, NH), 4.80 – 4.36 (m, 2H, CHP, CH), 3.72 – 3.07 (m, 4H, 2xCH<sub>2</sub>), 2.43 (d, *J* = 2.1 Hz, 6H, 2xSCH<sub>3</sub>), 2.41 – 2.33 (m, 2H, CH<sub>2</sub>), 2.33 – 1.94 (m, 3H, 2xCH<sub>2</sub>, CH), 1.94 – 1.61 (m, 4H, 2xCH<sub>2</sub>), 1.48 – 1.22 (m, 9H, Boc), 1.13 – 0.96 (m, 6H, 2xCH<sub>3</sub>).

**HRMS:** C<sub>32</sub>H<sub>46</sub>N<sub>3</sub>O<sub>7</sub>PS<sub>2</sub> [M+Na]<sup>+</sup> calc. 702.2412 found 702.2399

**HPLC:** purity >99%; retention time 17.360 and 17.567 min

**Chromatogram**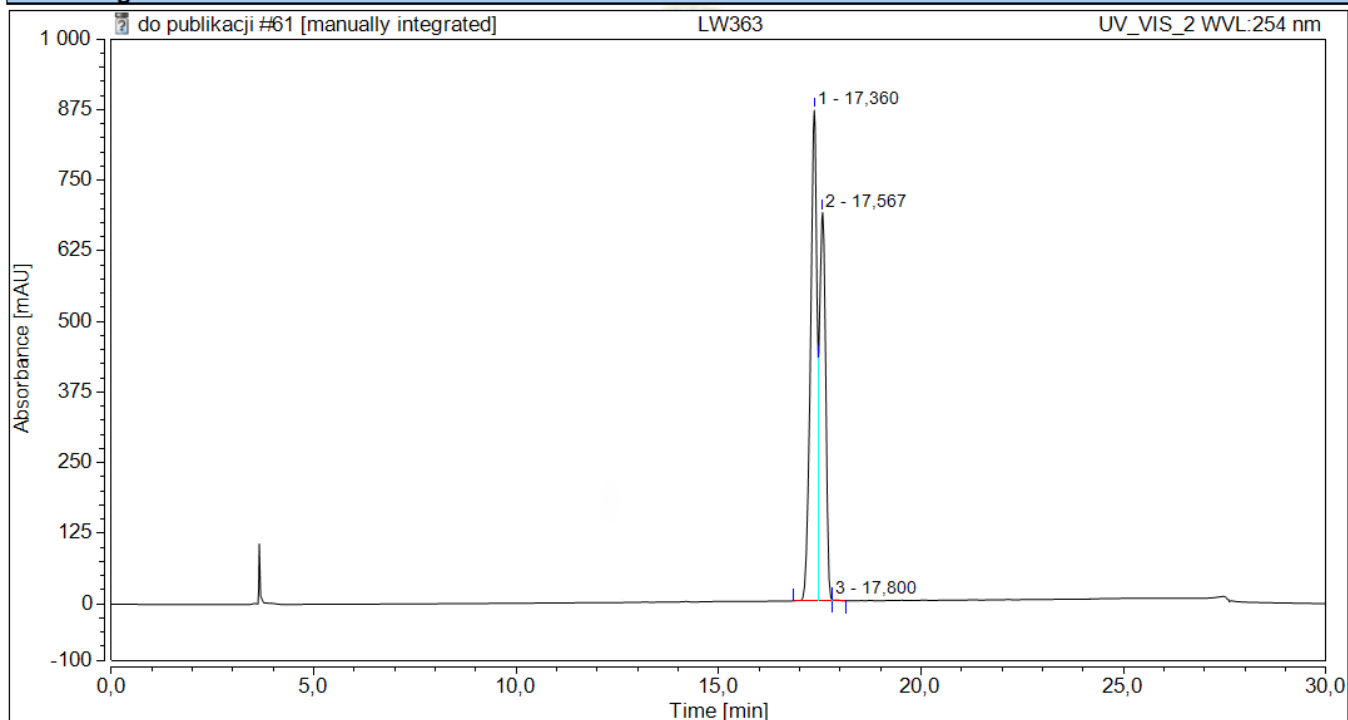**Integration Results**

| No.           | Peak Name | Retention Time<br>min | Area<br>mAU*min | Height<br>mAU   | Relative Area<br>% | Relative Height<br>% | Amount<br>n.a. |
|---------------|-----------|-----------------------|-----------------|-----------------|--------------------|----------------------|----------------|
| 1             |           | 17,360                | 157,500         | 868,493         | 56,40              | 55,75                | n.a.           |
| 2             |           | 17,567                | 121,485         | 687,522         | 43,50              | 44,13                | n.a.           |
| 3             |           | 17,800                | 0,268           | 1,886           | 0,10               | 0,12                 | n.a.           |
| <b>Total:</b> |           |                       | <b>279,252</b>  | <b>1557,901</b> | <b>100,00</b>      | <b>100,00</b>        |                |

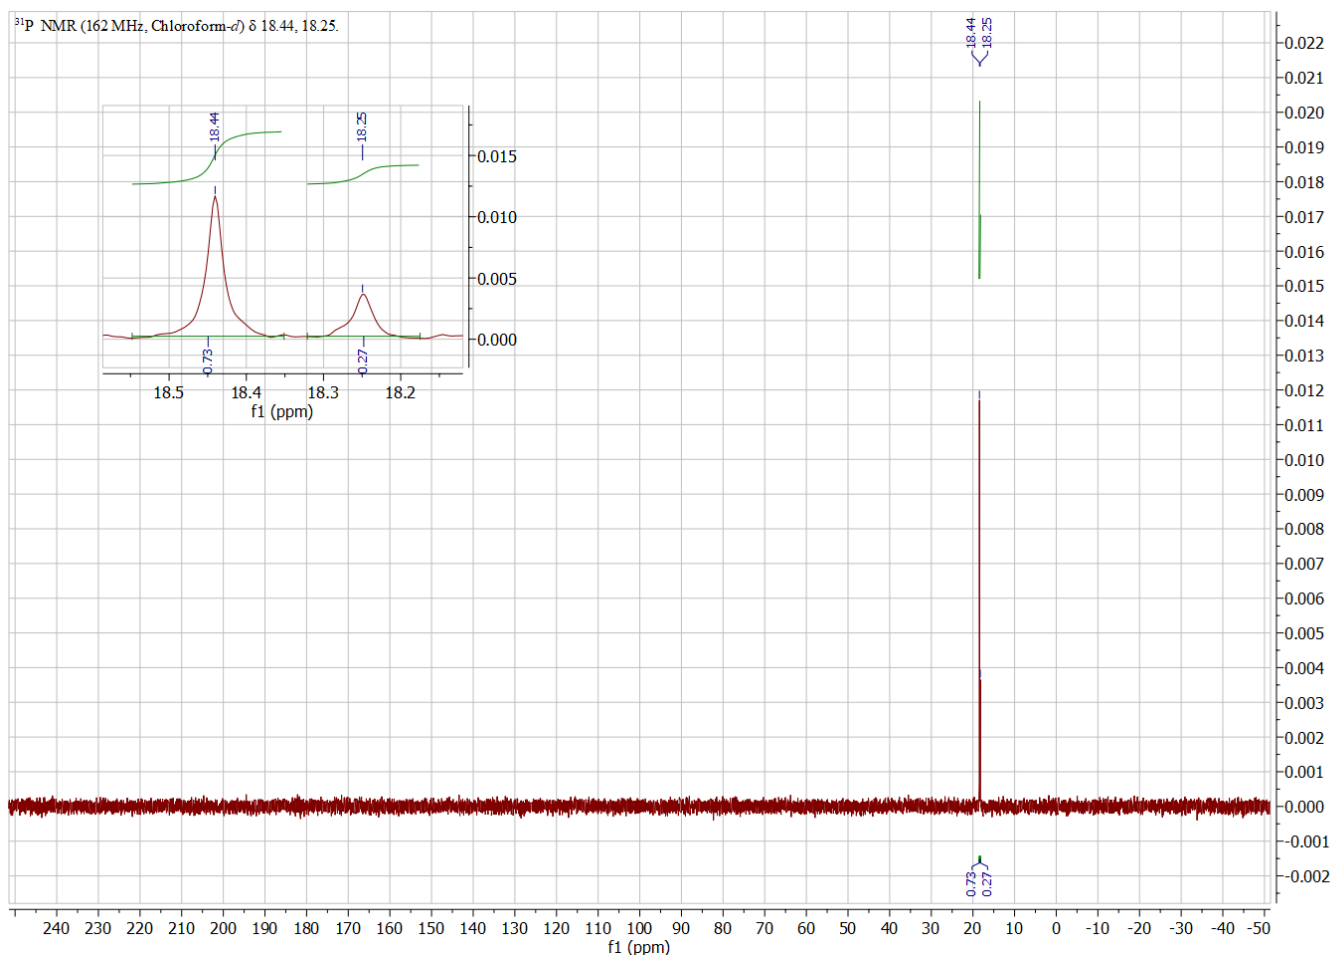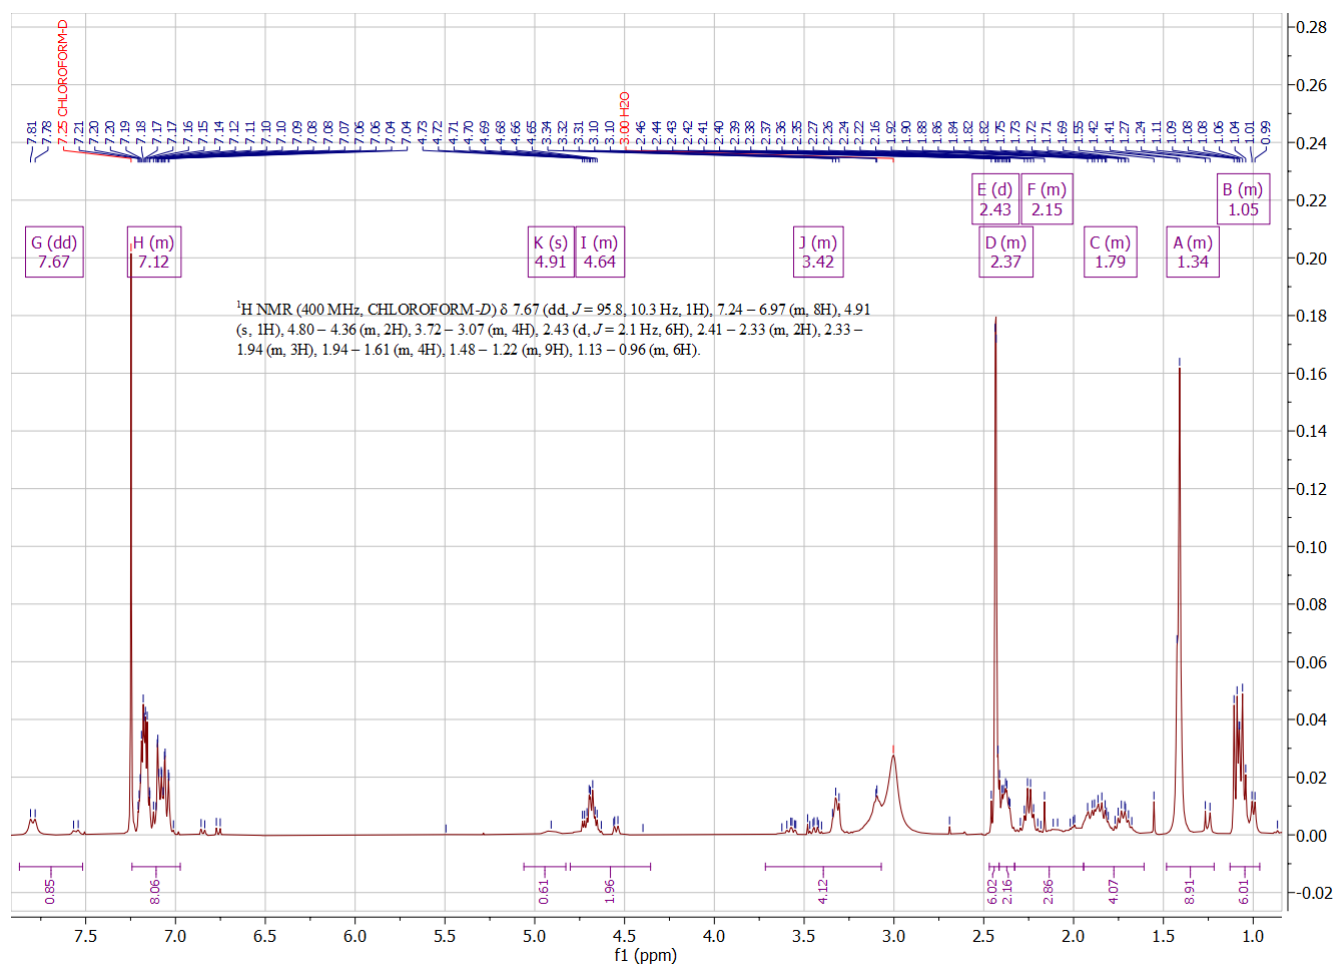

**(62) Boc-L-Abu-L-Pro-Val<sup>P</sup>(OPh-4-SCH<sub>3</sub>)<sub>2</sub>**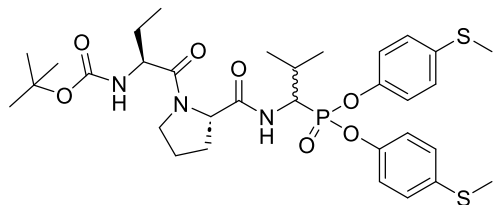

**Name:** *tert*-butyl ((2*S*)-1-((2*S*)-2-((1-(bis(4-(methylthio)phenoxy)phosphoryl)-2-methylpropyl)carbamoyl)pyrrolidin-1-yl)-1-oxobutan-2-yl)carbamate

<sup>31</sup>P NMR (162 MHz, Chloroform-*d*) δ 18.49 (s, 59%), 18.14 (s, 41%).

<sup>1</sup>H NMR (400 MHz, Chloroform-*d*) δ 1H NMR (400 MHz, CHLOROFORM-*D*) δ 7.41 (dd, *J* = 28.0, 10.5 Hz, 1H, NH), 7.21 – 6.70 (m, 8H, 8xArH), 5.22 (dd, *J* = 40.6, 8.8 Hz, 1H, NH), 4.77 – 3.96 (m, 3H, CHP, 2xCH), 3.85 – 3.32 (m, 2H, CH<sub>2</sub>), 2.47 – 2.39 (m, 6H, 2xSCH<sub>3</sub>), 2.39 – 2.27 (m, 1H, CH), 2.27 – 2.13 (m, 1H, 0.5xCH<sub>2</sub>), 2.13 – 1.85 (m, 3H, 1.5xCH<sub>2</sub>), 1.85 – 1.46 (m, 2H, CH<sub>2</sub>), 1.46 – 1.22 (m, 9H, Boc), 1.11 – 0.80 (m, 9H, 3xCH<sub>3</sub>).

**HRMS:** C<sub>32</sub>H<sub>46</sub>N<sub>3</sub>O<sub>7</sub>PS<sub>2</sub> [M+Na]<sup>+</sup> calc. 702.2412 found 702.2396

**HPLC:** purity >99%; retention time 18.143 and 18.427 min

**Chromatogram**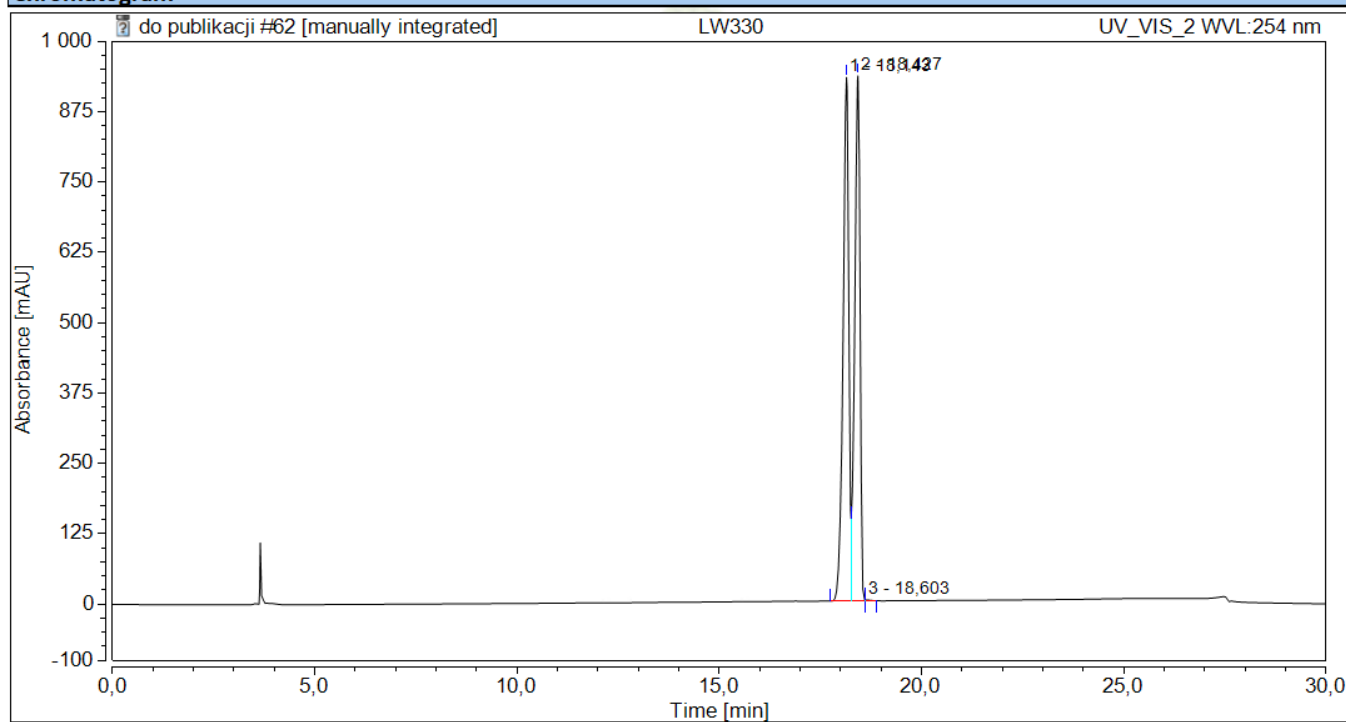**Integration Results**

| No.           | Peak Name | Retention Time min | Area mAU*min   | Height mAU      | Relative Area % | Relative Height % | Amount n.a. |
|---------------|-----------|--------------------|----------------|-----------------|-----------------|-------------------|-------------|
| 1             |           | 18,143             | 150,403        | 930,113         | 51,36           | 49,89             | n.a.        |
| 2             |           | 18,427             | 142,241        | 932,688         | 48,57           | 50,02             | n.a.        |
| 3             |           | 18,603             | 0,192          | 1,695           | 0,07            | 0,09              | n.a.        |
| <b>Total:</b> |           |                    | <b>292,836</b> | <b>1864,496</b> | <b>100,00</b>   | <b>100,00</b>     |             |

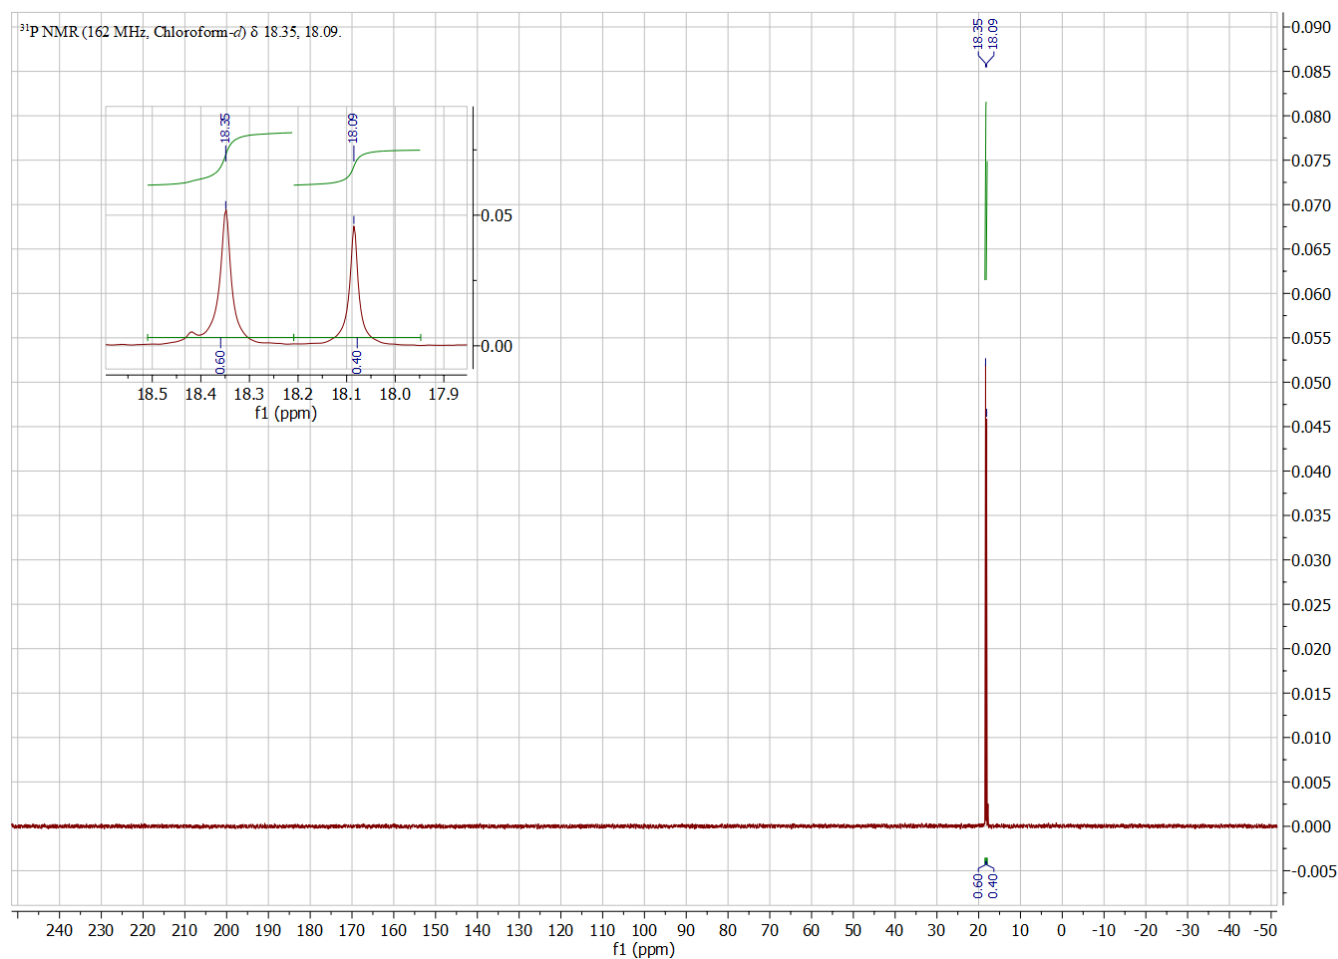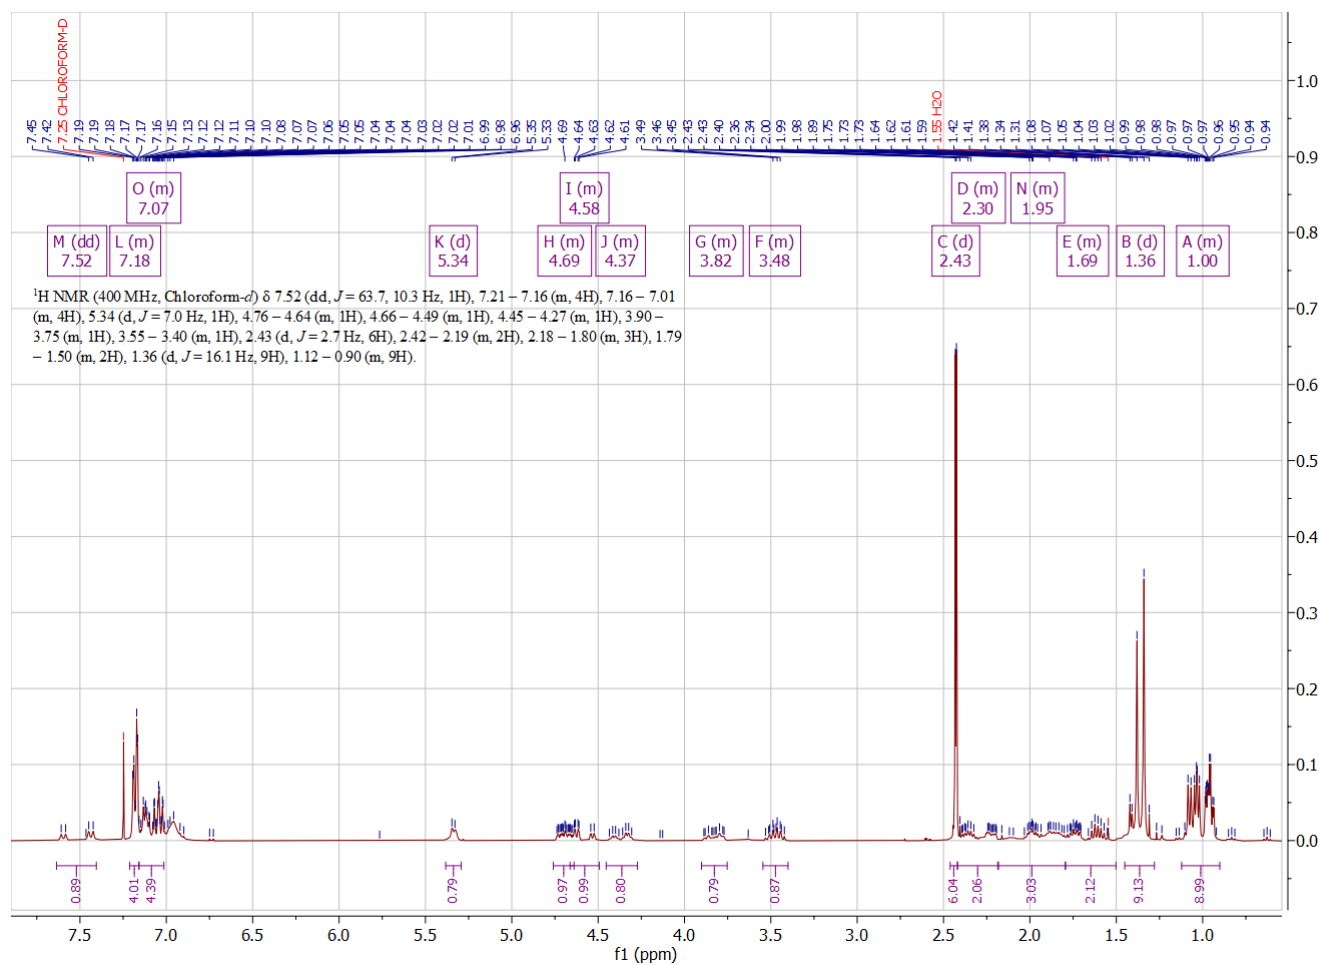

**(63) Boc-D-Abu-L-Pro-Val<sup>P</sup>(OPh-4-SCH<sub>3</sub>)<sub>2</sub>**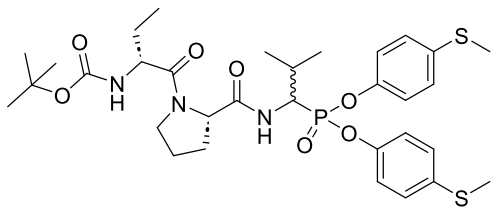

**Name:** *tert*-butyl ((2*R*)-1-((2*S*)-2-((1-(bis(4-(methylthio)phenoxy)phosphoryl)-2-methylpropyl)carbamoyl)pyrrolidin-1-yl)-1-oxobutan-2-yl)carbamate

<sup>31</sup>P NMR (162 MHz, Chloroform-*d*) δ 18.35 (s, 60%), 18.09 (s, 40%).

<sup>1</sup>H NMR (400 MHz, Chloroform-*d*) δ 7.52 (dd, *J* = 63.7, 10.3 Hz, 1H, NH), 7.21 – 7.16 (m, 4H, 4xArH), 7.16 – 7.01 (m, 4H, 4xArH), 5.34 (d, *J* = 7.0 Hz, 1H, NH), 4.76 – 4.64 (m, 1H, CHP), 4.66 – 4.49 (m, 1H, CH), 4.45 – 4.27 (m, 1H, CH), 3.90 – 3.75 (m, 1H, 0.5xCH<sub>2</sub>), 3.55 – 3.40 (m, 1H, 0.5xCH<sub>2</sub>), 2.43 (d, *J* = 2.7 Hz, 6H, 2xSCH<sub>3</sub>), 2.42 – 2.19 (m, 2H, 0.5xCH<sub>2</sub>, CH), 2.18 – 1.80 (m, 3H, 1.5xCH<sub>2</sub>), 1.79 – 1.50 (m, 2H, CH<sub>2</sub>), 1.36 (d, *J* = 16.1 Hz, 9H, Boc), 1.12 – 0.90 (m, 9H, 3xCH<sub>3</sub>).

**HRMS:** C<sub>32</sub>H<sub>46</sub>N<sub>3</sub>O<sub>7</sub>PS<sub>2</sub> [M+Na]<sup>+</sup> calc. 702.2412 found 702.2405

**HPLC:** purity >99%; retention time 18.293 min

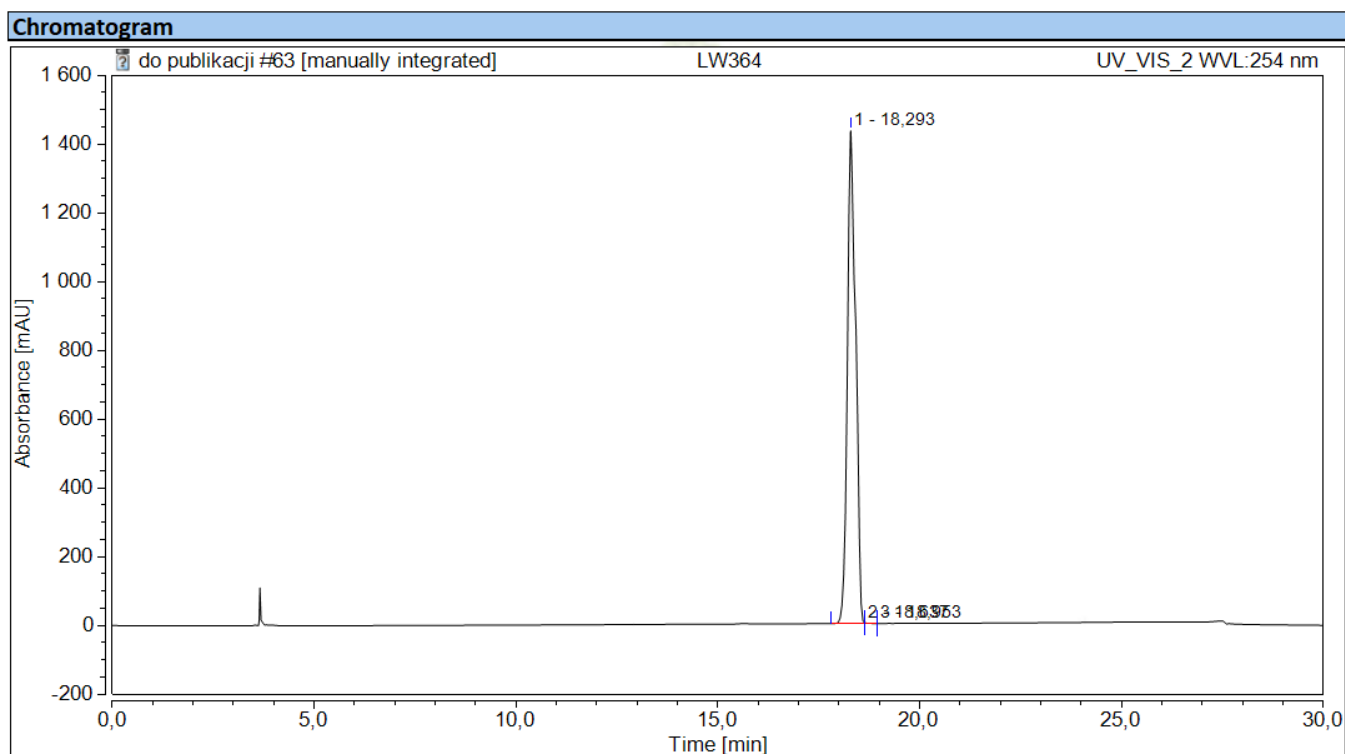

| Integration Results |           |                    |                |                 |                 |                   |        |
|---------------------|-----------|--------------------|----------------|-----------------|-----------------|-------------------|--------|
| No.                 | Peak Name | Retention Time min | Area mAU*min   | Height mAU      | Relative Area % | Relative Height % | Amount |
| 1                   |           | 18,293             | 340,133        | 1432,720        | 99,95           | 99,88             | n.a.   |
| 2                   |           | 18,637             | 0,167          | 1,753           | 0,05            | 0,12              | n.a.   |
| 3                   |           | 18,953             | 0,000          | 0,000           | 0,00            | 0,00              | n.a.   |
| <b>Total:</b>       |           |                    | <b>340,300</b> | <b>1434,472</b> | <b>100,00</b>   | <b>100,00</b>     |        |



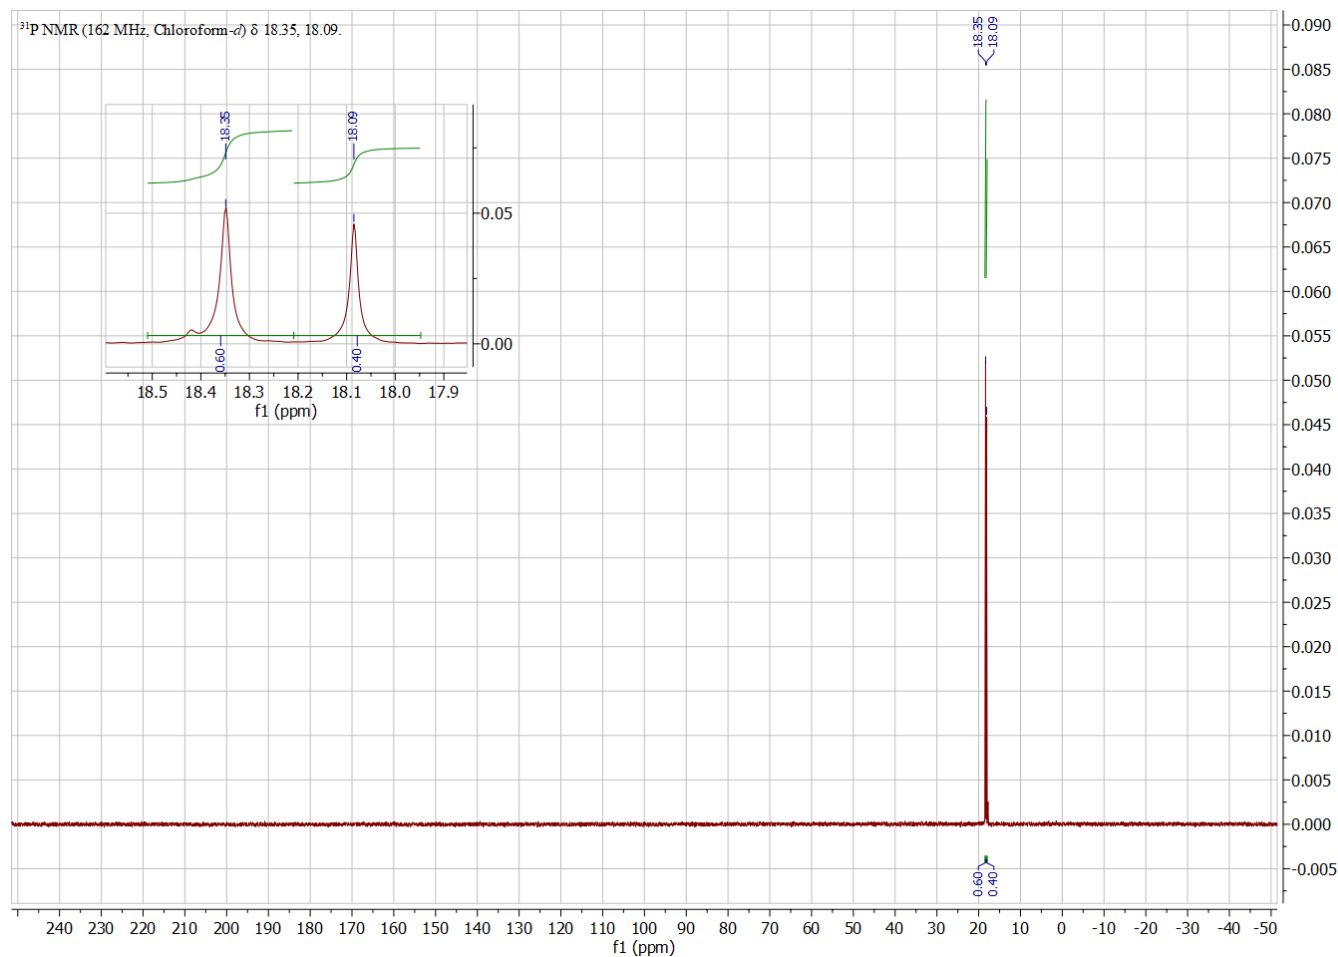

**(64) Boc-AC4C-L-Pro-Val<sup>P</sup>(OPh-4-SCH<sub>3</sub>)<sub>2</sub>**

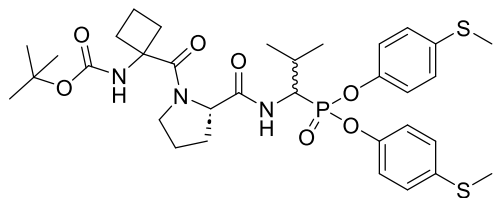

**Name:** *tert*-butyl (1-((2*S*)-2-((1-(bis(4-(methylthio)phenoxy)phosphoryl)-2-methylpropyl)carbamoyl)pyrrolidine-1-carbonyl)cyclobutyl)carbamate

**<sup>31</sup>P NMR** (162 MHz, Chloroform-*d*) δ 18.78 (s, 75%), 18.06 (s, 25%).

**<sup>1</sup>H NMR** (400 MHz, Chloroform-*d*) δ 7.72 (d, *J* = 7.8 Hz, 1H, NH), 7.21 – 6.98 (m, 8H, 8xArH), 5.27 – 5.15 (m, 1H, NH), 4.81 – 4.58 (m, 2H, CHP, CH), 3.62 – 3.31 (m, 2H, CH<sub>2</sub>), 3.08 – 2.88 (m, 1H, 0.5xCH<sub>2</sub>), 2.54 – 2.34 (m, 8H, 2xSCH<sub>3</sub>, 0.5xCH<sub>2</sub>, CH), 2.29 – 1.93 (m, 4H, 2xCH<sub>2</sub>), 1.93 – 1.73 (m, 4H, 2xCH<sub>2</sub>), 1.37 (d, *J* = 7.9 Hz, 9H, Boc), 1.22 – 0.99 (m, 6H, 2xCH<sub>3</sub>).

**HRMS:** C<sub>33</sub>H<sub>46</sub>N<sub>3</sub>O<sub>7</sub>PS<sub>2</sub> [M+Na]<sup>+</sup> calc. 714,2412 found 714.2411

**HPLC:** purity >99%; retention time 18.170 and 18.337 min

**Chromatogram**

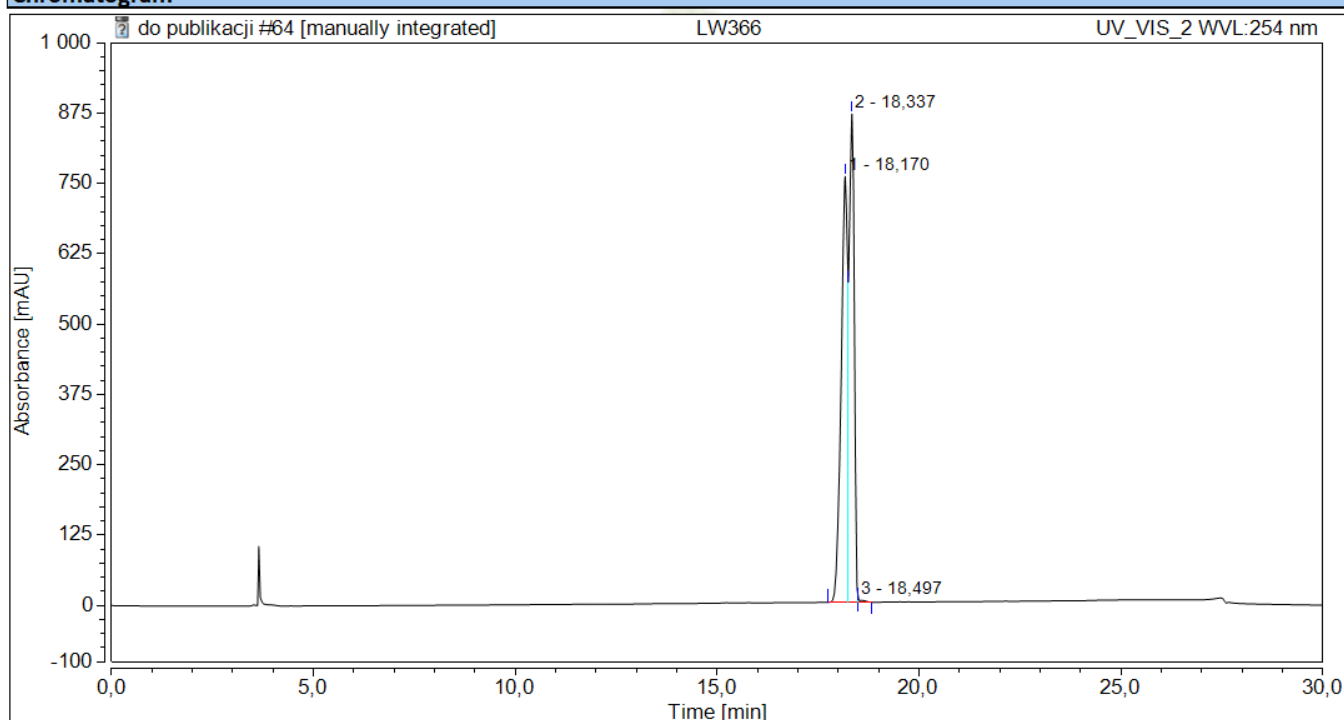

**Integration Results**

| No.           | Peak Name | Retention Time<br>min | Area<br>mAU*min | Height<br>mAU   | Relative Area<br>% | Relative Height<br>% | Amount<br>n.a. |
|---------------|-----------|-----------------------|-----------------|-----------------|--------------------|----------------------|----------------|
| 1             |           | 18,170                | 136,879         | 756,613         | 51,63              | 46,46                | n.a.           |
| 2             |           | 18,337                | 127,577         | 867,601         | 48,12              | 53,27                | n.a.           |
| 3             |           | 18,497                | 0,657           | 4,437           | 0,25               | 0,27                 | n.a.           |
| <b>Total:</b> |           |                       | <b>265,113</b>  | <b>1628,651</b> | <b>100,00</b>      | <b>100,00</b>        |                |

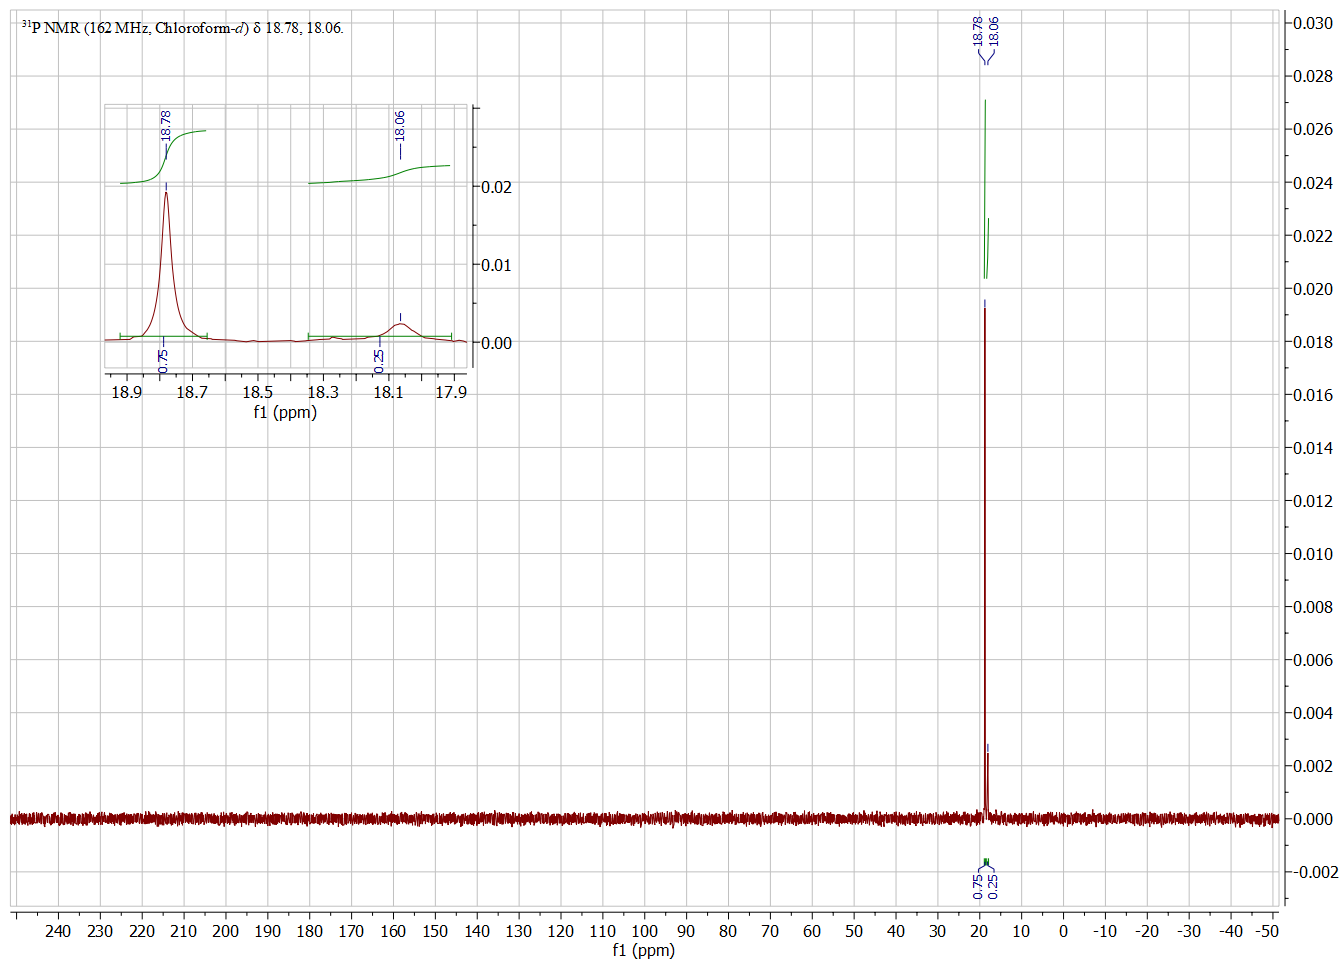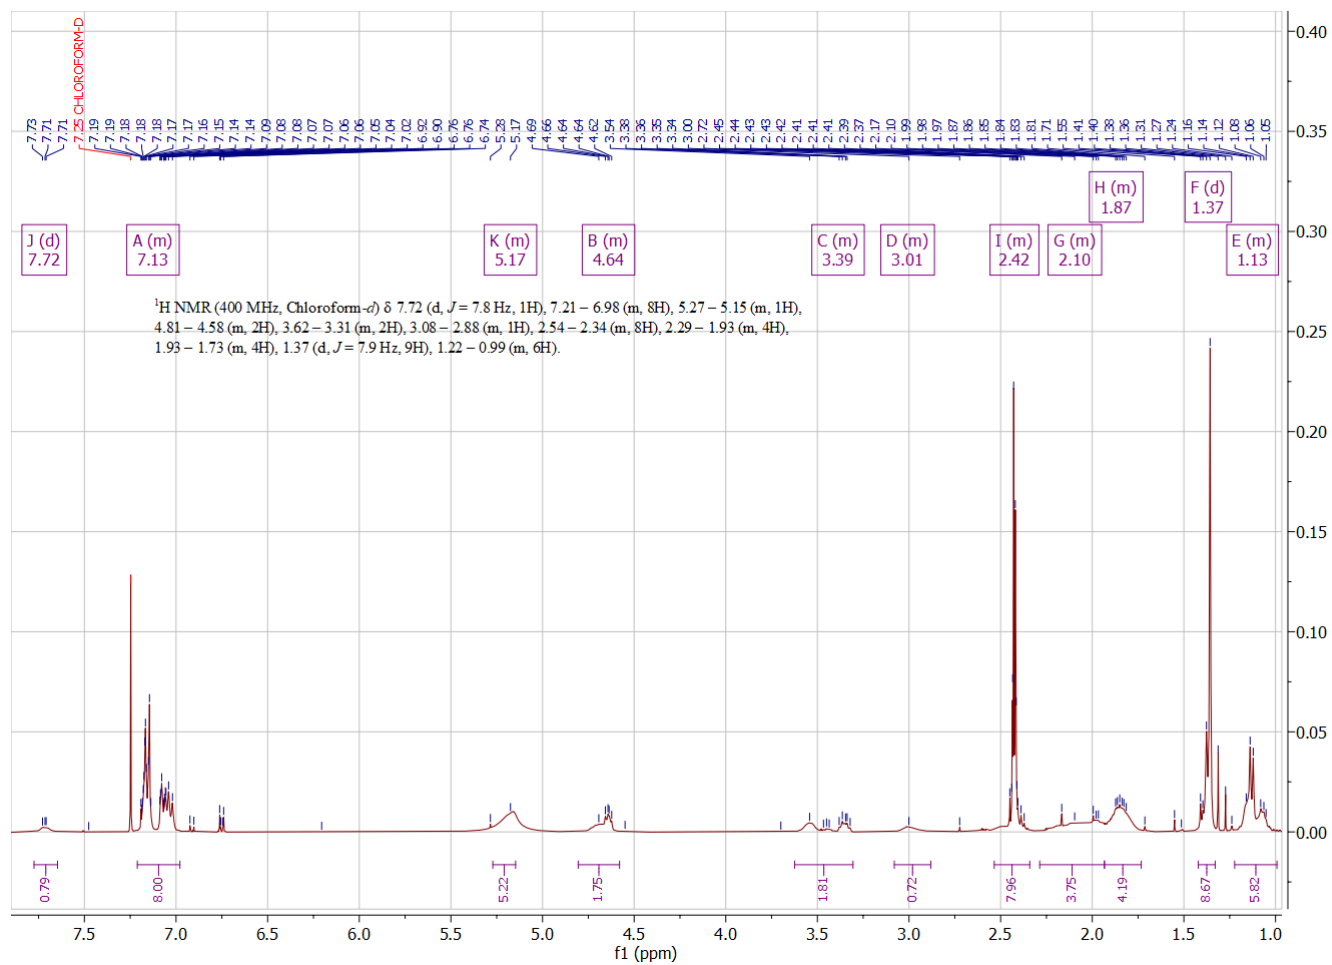

**(65) Boc-L-Nva-L-Pro- Val<sup>P</sup>(OPh-4-SCH<sub>3</sub>)<sub>2</sub>**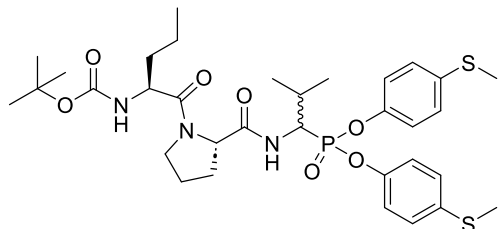

**Name:** *tert*-butyl ((2*S*)-1-((2*S*)-2-((1-(bis(4-(methylthio)phenoxy)phosphoryl)-2-methylpropyl)carbamoyl)pyrrolidin-1-yl)-1-oxopentan-2-yl)carbamate

**<sup>31</sup>P NMR** (162 MHz, Chloroform-*d*) δ 18.37 (s, 53%), 17.97 (s, 47%).

**<sup>1</sup>H NMR** (400 MHz, Chloroform-*d*) δ 7.39 (dd, *J* = 27.7, 10.4 Hz, 1H, NH), 7.23 – 7.14 (m, 4H, 4xArH), 7.13 – 7.01 (m, 4H, 4xArH), 5.29 (dd, *J* = 43.7, 8.8 Hz, 1H, NH), 4.77 – 4.48 (m, 2H, CHP, CH), 4.46 – 4.32 (m, 1H, CH), 3.77 – 3.66 (m, 1H, 0.5xCH<sub>2</sub>), 3.61 – 3.43 (m, 1H, 0.5xCH<sub>2</sub>), 2.43 (d, *J* = 1.6 Hz, 6H, 2xSCH<sub>3</sub>), 2.41 – 2.27 (m, 2H, CH<sub>2</sub>), 2.23 – 1.81 (m, 3H, CH<sub>2</sub>, CH), 1.68 – 1.43 (m, 2H, CH<sub>2</sub>), 1.41 (d, *J* = 2.2 Hz, 9H, Boc), 1.39 – 1.15 (m, 2H, CH<sub>2</sub>), 1.09 – 0.93 (m, 6H, 2xCH<sub>3</sub>), 0.82 (dt, *J* = 65.7, 7.2 Hz, 3H, CH<sub>3</sub>).

**HRMS:** C<sub>33</sub>H<sub>48</sub>N<sub>3</sub>O<sub>7</sub>PS<sub>2</sub> [M+Na]<sup>+</sup> calc. 716.2569 found 716.2538

**HPLC:** purity >99%; retention time 18.870 and 19.060 min

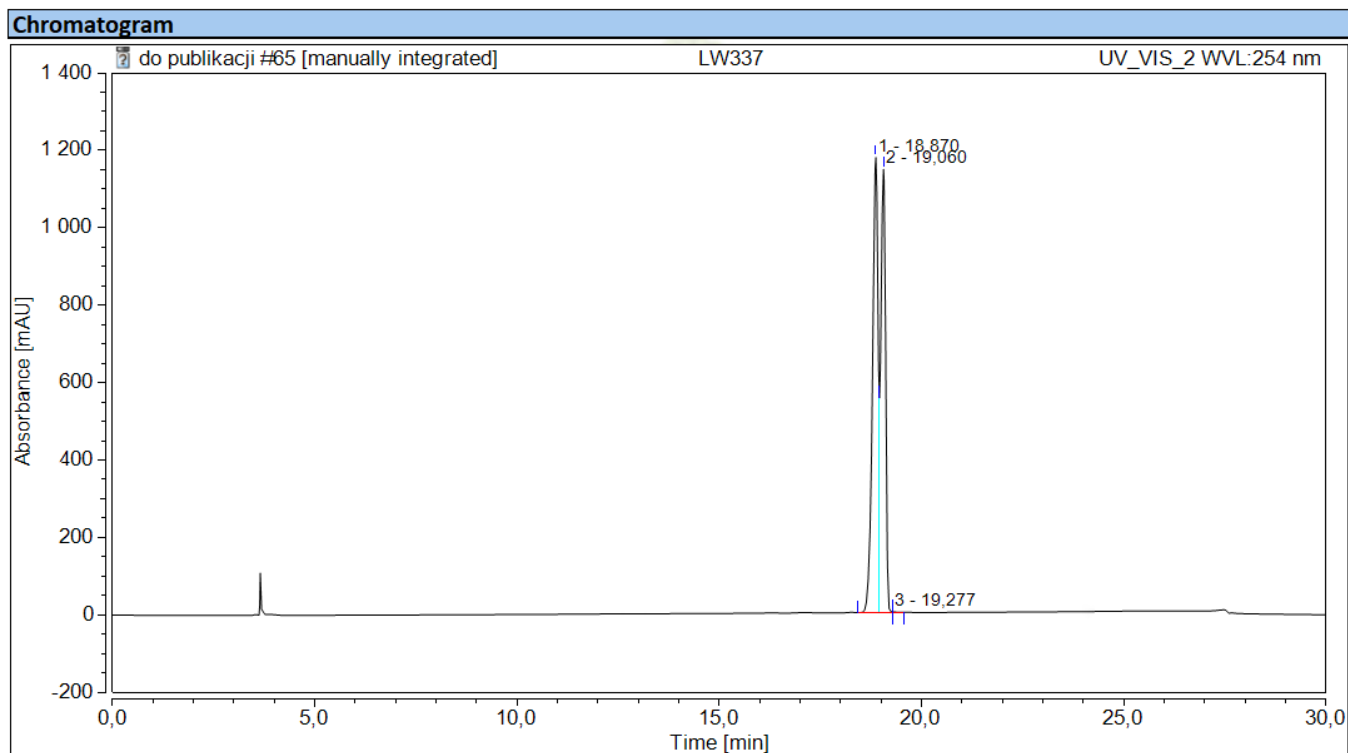

| Integration Results |           |                    |                |                 |                 |                   |             |
|---------------------|-----------|--------------------|----------------|-----------------|-----------------|-------------------|-------------|
| No.                 | Peak Name | Retention Time min | Area mAU*min   | Height mAU      | Relative Area % | Relative Height % | Amount n.a. |
| 1                   |           | 18,870             | 190,967        | 1175,642        | 54,73           | 50,62             | n.a.        |
| 2                   |           | 19,060             | 157,749        | 1144,759        | 45,21           | 49,29             | n.a.        |
| 3                   |           | 19,277             | 0,233          | 1,940           | 0,07            | 0,08              | n.a.        |
| <b>Total:</b>       |           |                    | <b>348,948</b> | <b>2322,342</b> | <b>100,00</b>   | <b>100,00</b>     |             |

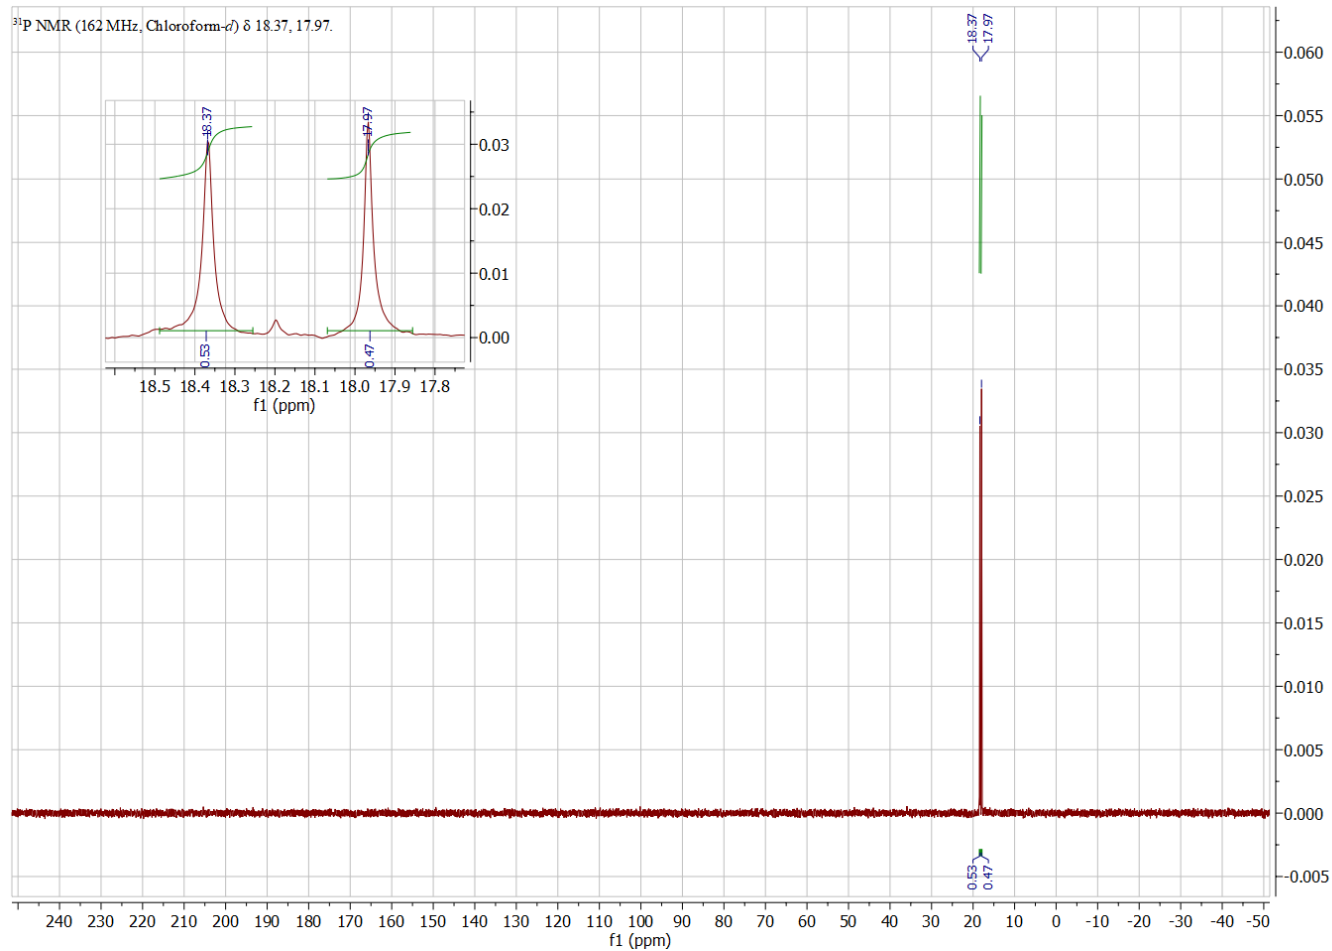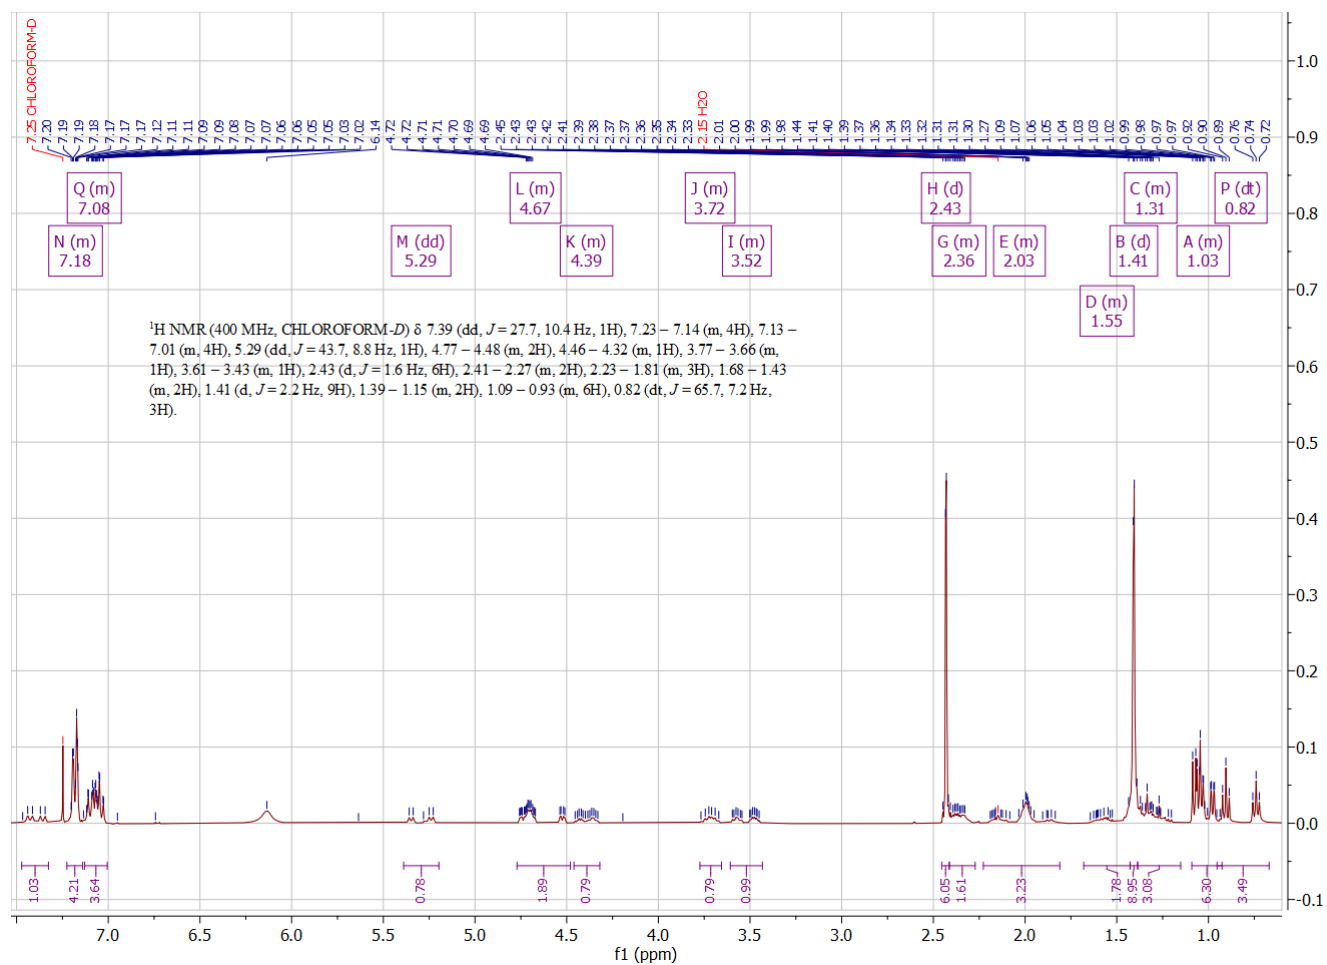

**(66) Boc-D-Nva-L-Pro-Val<sup>P</sup>(OPh-4-SCH<sub>3</sub>)<sub>2</sub>**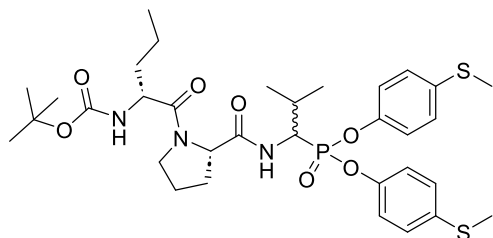

**Name:** *tert*-butyl ((2*R*)-1-((2*S*)-2-((1-(bis(4-(methylthio)phenoxy)phosphoryl)-2-methylpropyl)carbamoyl)pyrrolidin-1-yl)-1-oxopentan-2-yl)carbamate

<sup>31</sup>P NMR (162 MHz, Chloroform-*d*) δ 18.46 (s, 50%), 18.17 (s, 50%).

<sup>1</sup>H NMR (400 MHz, Chloroform-*d*) δ 7.54 (dd, *J* = 82.9, 10.3 Hz, 1H, NH), 7.22 – 7.10 (m, 6H, 6xArH), 7.09 – 7.00 (m, 2H, 2xArH), 5.27 (t, *J* = 7.3 Hz, 1H, NH), 4.73 – 4.64 (m, 1H, CHP), 4.64 – 4.51 (m, 1H, CH), 4.51 – 4.34 (m, 1H, CH), 3.89 – 3.74 (m, 1H, 0.5xCH<sub>2</sub>), 3.53 – 3.39 (m, 1H, 0.5xCH<sub>2</sub>), 2.43 (d, *J* = 4.0 Hz, 6H, 2xSCH<sub>3</sub>), 2.41 – 2.20 (m, 2H, CH<sub>2</sub>), 2.17 – 1.76 (m, 3H, CH<sub>2</sub>, CH), 1.69 – 1.50 (m, 2H, CH<sub>2</sub>), 1.49 – 1.30 (m, 2H, CH<sub>2</sub>), 1.36 (d, *J* = 17.4 Hz, 9H, Boc), 1.12 – 0.96 (m, 6H, 2xCH<sub>3</sub>), 0.96 – 0.90 (m, 3H, CH<sub>3</sub>).

**HRMS:** C<sub>33</sub>H<sub>48</sub>N<sub>3</sub>O<sub>7</sub>PS [M+Na]<sup>+</sup> calc. 716.2569 found 716.2576

**HPLC:** purity >99%; retention time 18.947 min

**Chromatogram**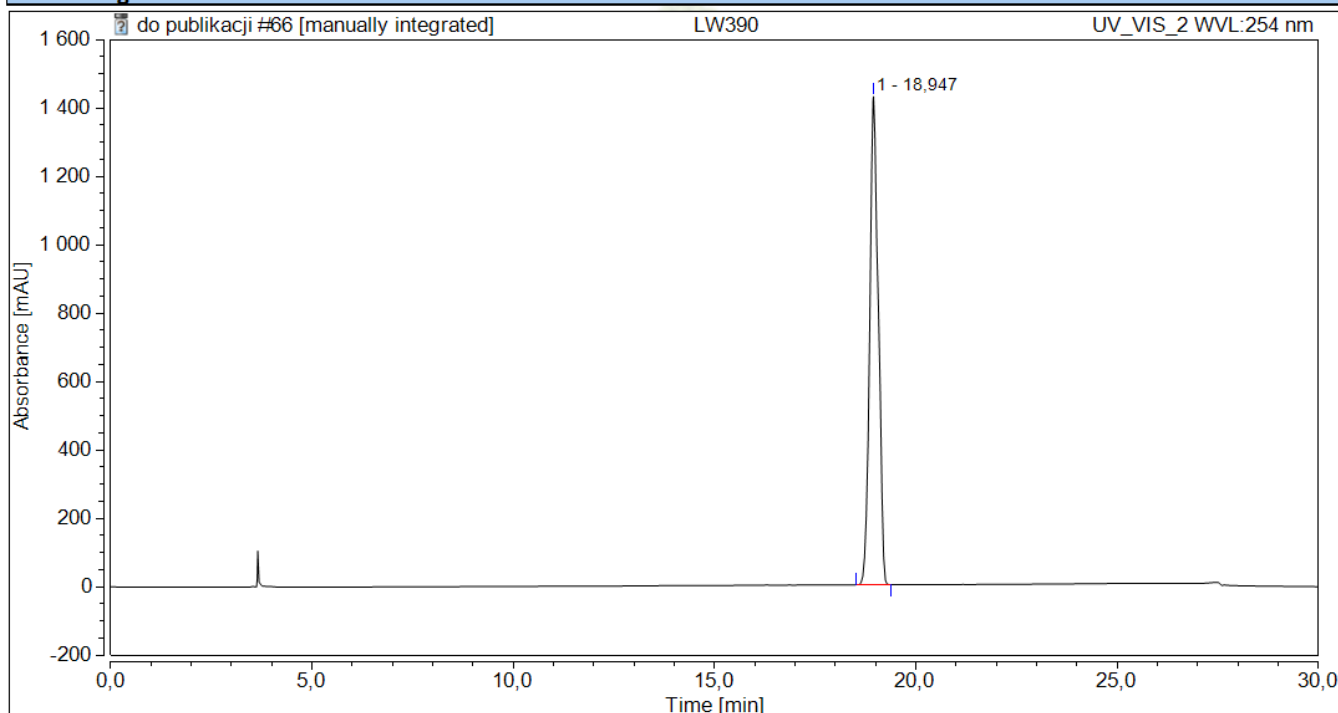**Integration Results**

| No.           | Peak Name | Retention Time<br>min | Area<br>mAU*min | Height<br>mAU   | Relative Area<br>% | Relative Height<br>% | Amount<br>n.a. |
|---------------|-----------|-----------------------|-----------------|-----------------|--------------------|----------------------|----------------|
| 1             |           | 18,947                | 350,989         | 1427,156        | 100,00             | 100,00               | n.a.           |
| <b>Total:</b> |           |                       | <b>350,989</b>  | <b>1427,156</b> | <b>100,00</b>      | <b>100,00</b>        |                |

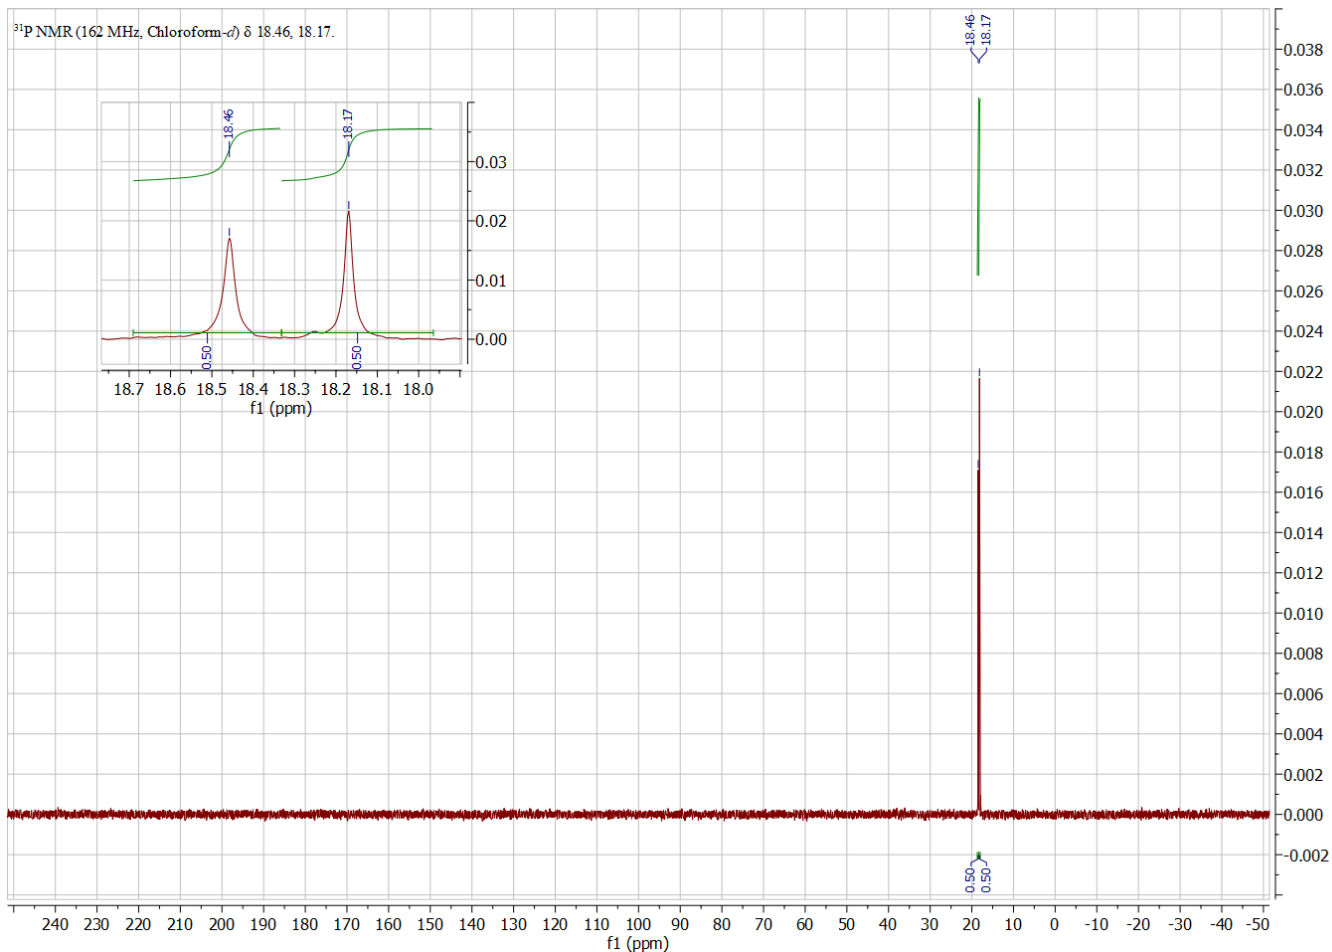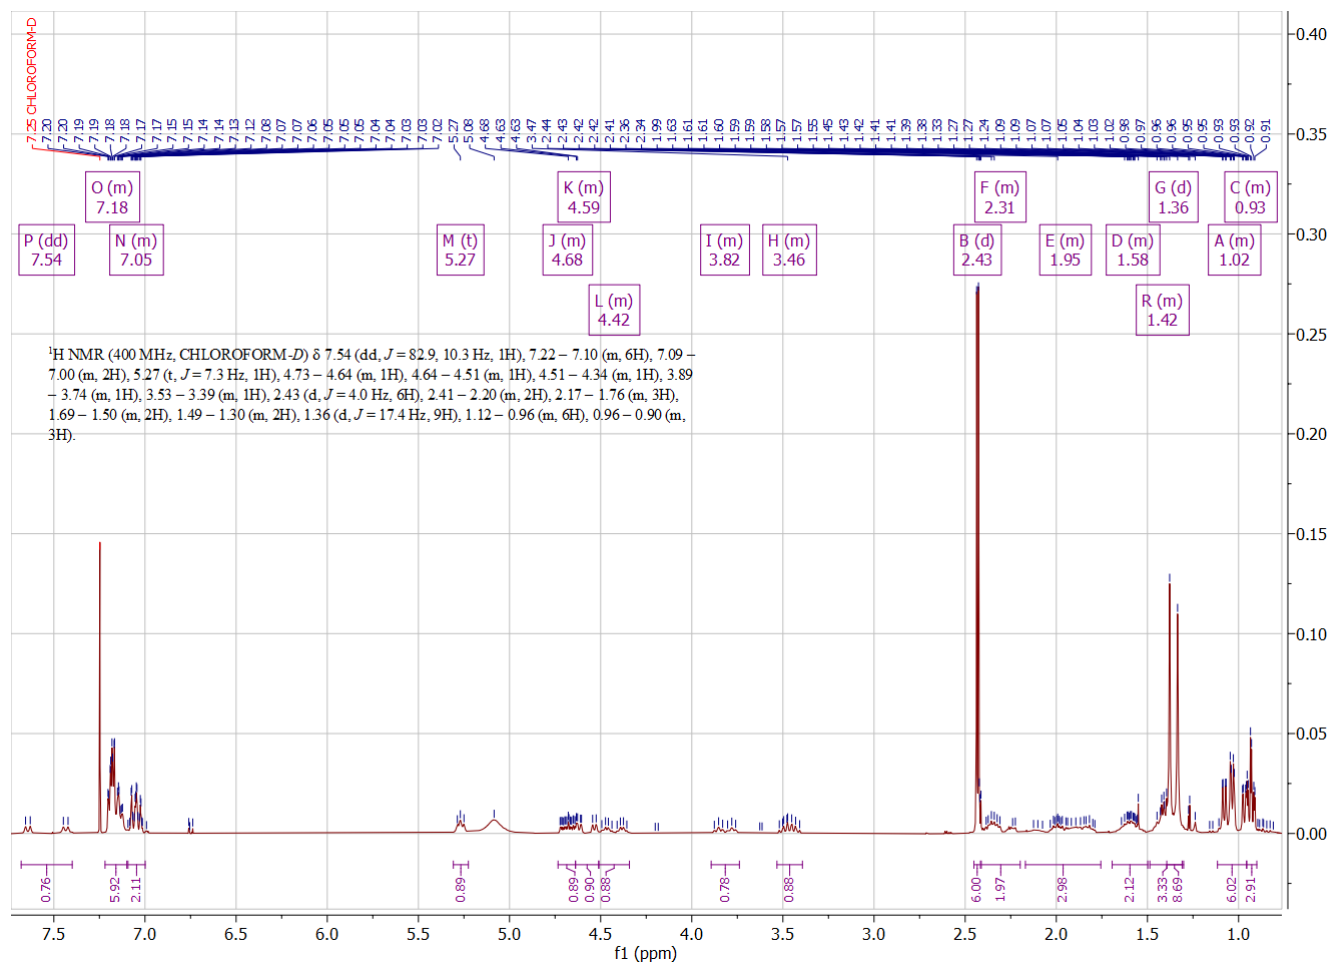

**(67) Boc-D-Val-L-Pro-Val<sup>P</sup>(OPh-4-SCH<sub>3</sub>)<sub>2</sub>**

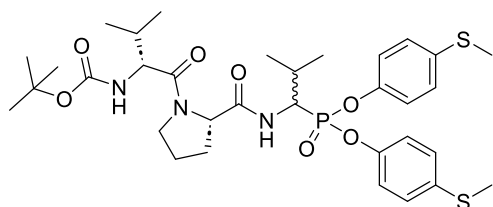

**Name:** *tert*-butyl ((2*R*)-1-((2*S*)-2-((1-(bis(4-(methylthio)phenoxy)phosphoryl)-2-methylpropyl)carbamoyl)pyrrolidin-1-yl)-3-methyl-1-oxobutan-2-yl)carbamate

<sup>31</sup>P NMR (162 MHz, Chloroform-*d*) δ 18.35 (s, 54%), 18.15 (s, 46%).

<sup>1</sup>H NMR (400 MHz, Chloroform-*d*) δ 7.56 (dd, *J* = 122.4, 10.3 Hz, 1H, NH), 7.22 – 7.09 (m, 6H, 6xArH), 7.09 – 6.95 (m, 2H, 2xArH), 5.27 (d, *J* = 9.6 Hz, 1H, NH), 4.74 – 4.63 (m, 1H, CHP), 4.58 (dd, *J* = 22.0, 8.0 Hz, 1H, CH), 4.31 – 4.18 (m, 1H, CH), 3.92 – 3.78 (m, 1H, 0.5xCH<sub>2</sub>), 3.59 – 3.44 (m, 1H, 0.5xCH<sub>2</sub>), 2.46 – 2.40 (m, 6H, 2xSCH<sub>3</sub>), 2.40 – 2.28 (m, 1H, CH), 2.26 – 2.03 (m, 1H, CH), 2.03 – 1.74 (m, 4H, 2xCH<sub>2</sub>), 1.35 (d, *J* = 23.8 Hz, 9H, Boc), 1.09 – 0.89 (m, 12H, 4xCH<sub>3</sub>).

**HRMS:** C<sub>33</sub>H<sub>48</sub>N<sub>3</sub>O<sub>7</sub>PS<sub>2</sub> [M+Na]<sup>+</sup> calc. 716.2569 found 716.2557

**HPLC:** purity >99%; retention time 18.970 min

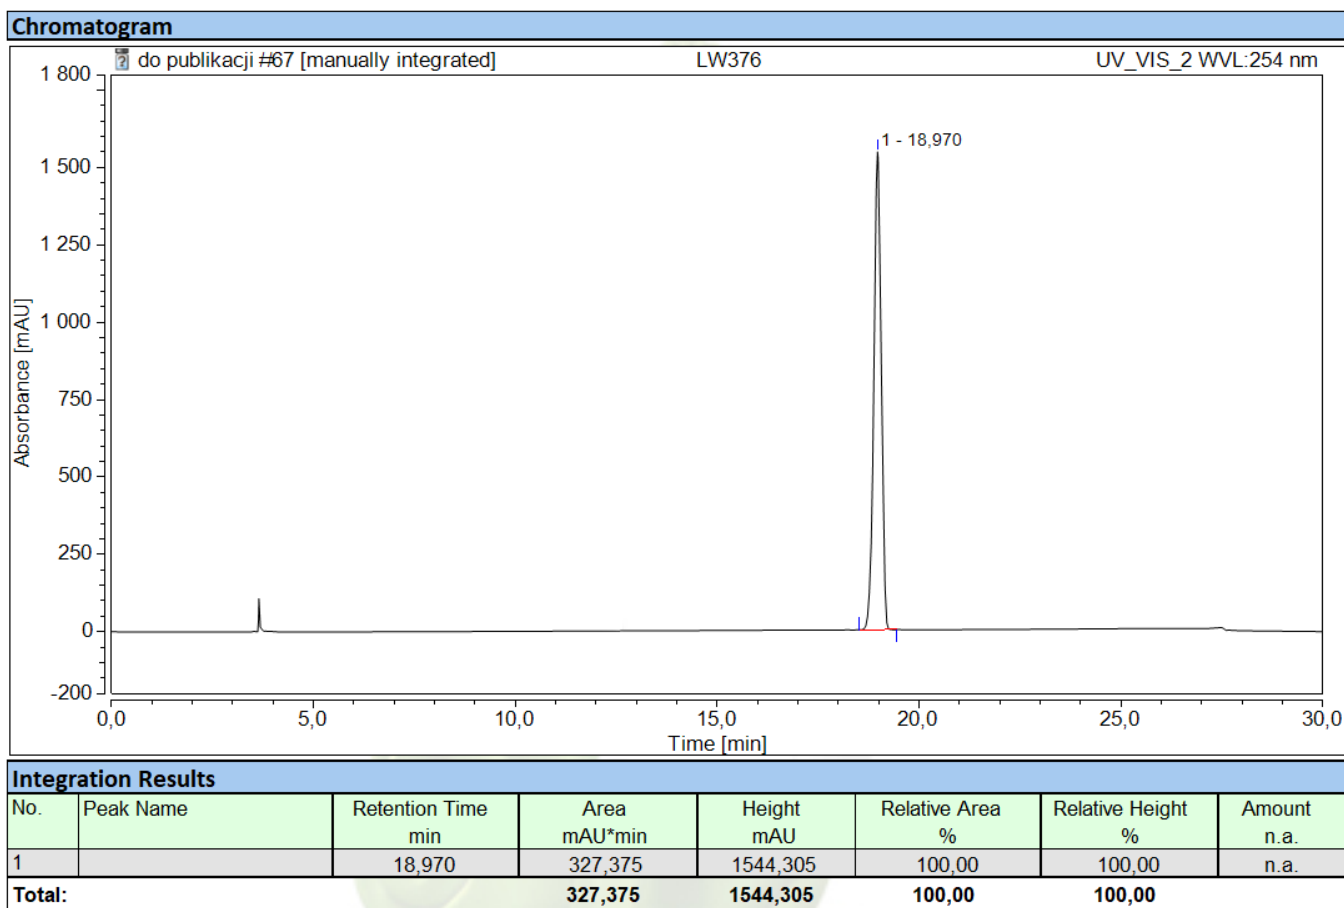



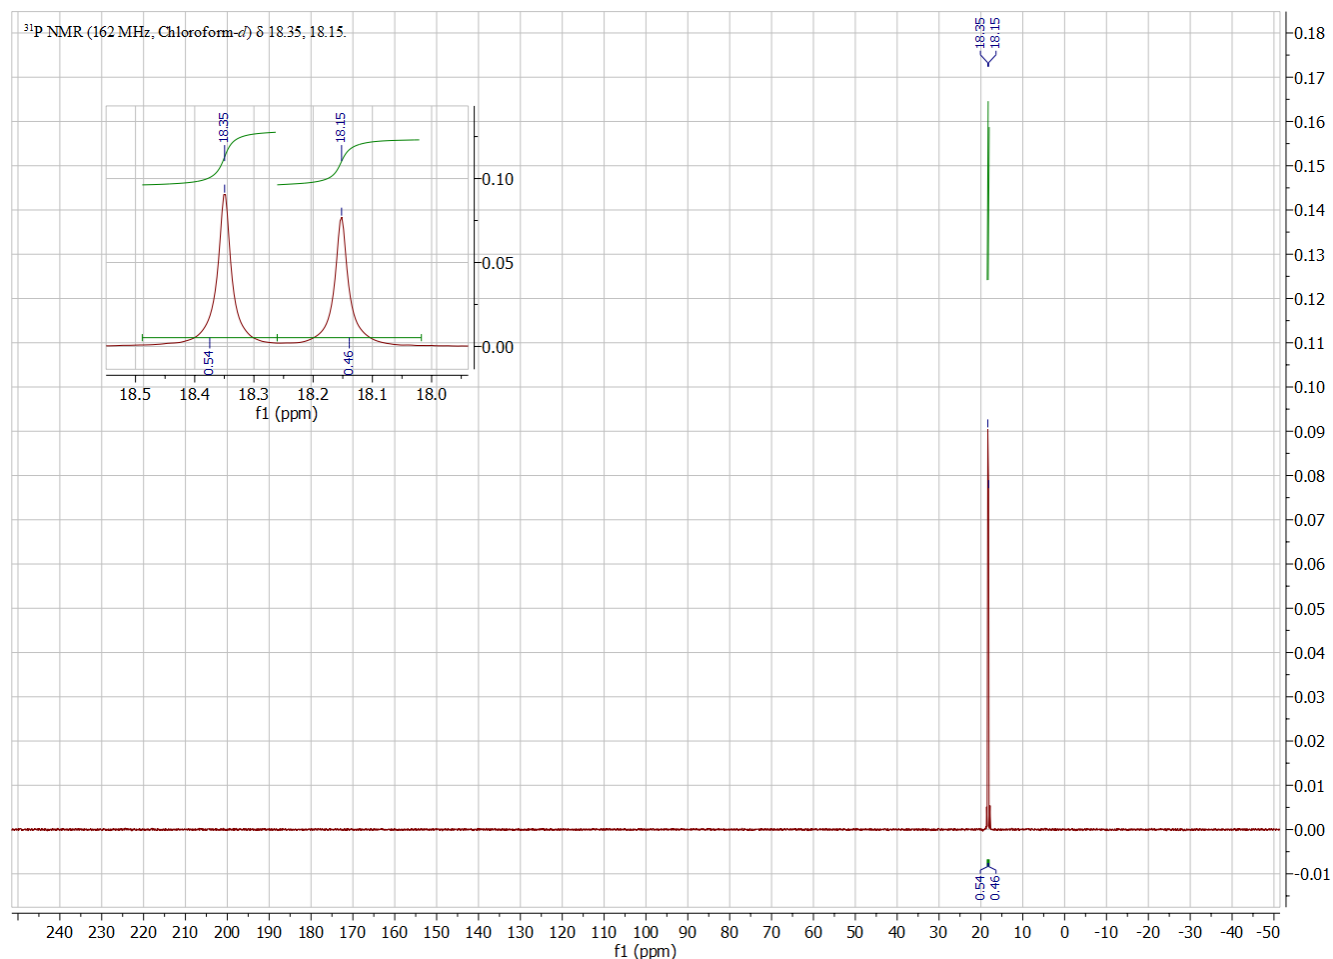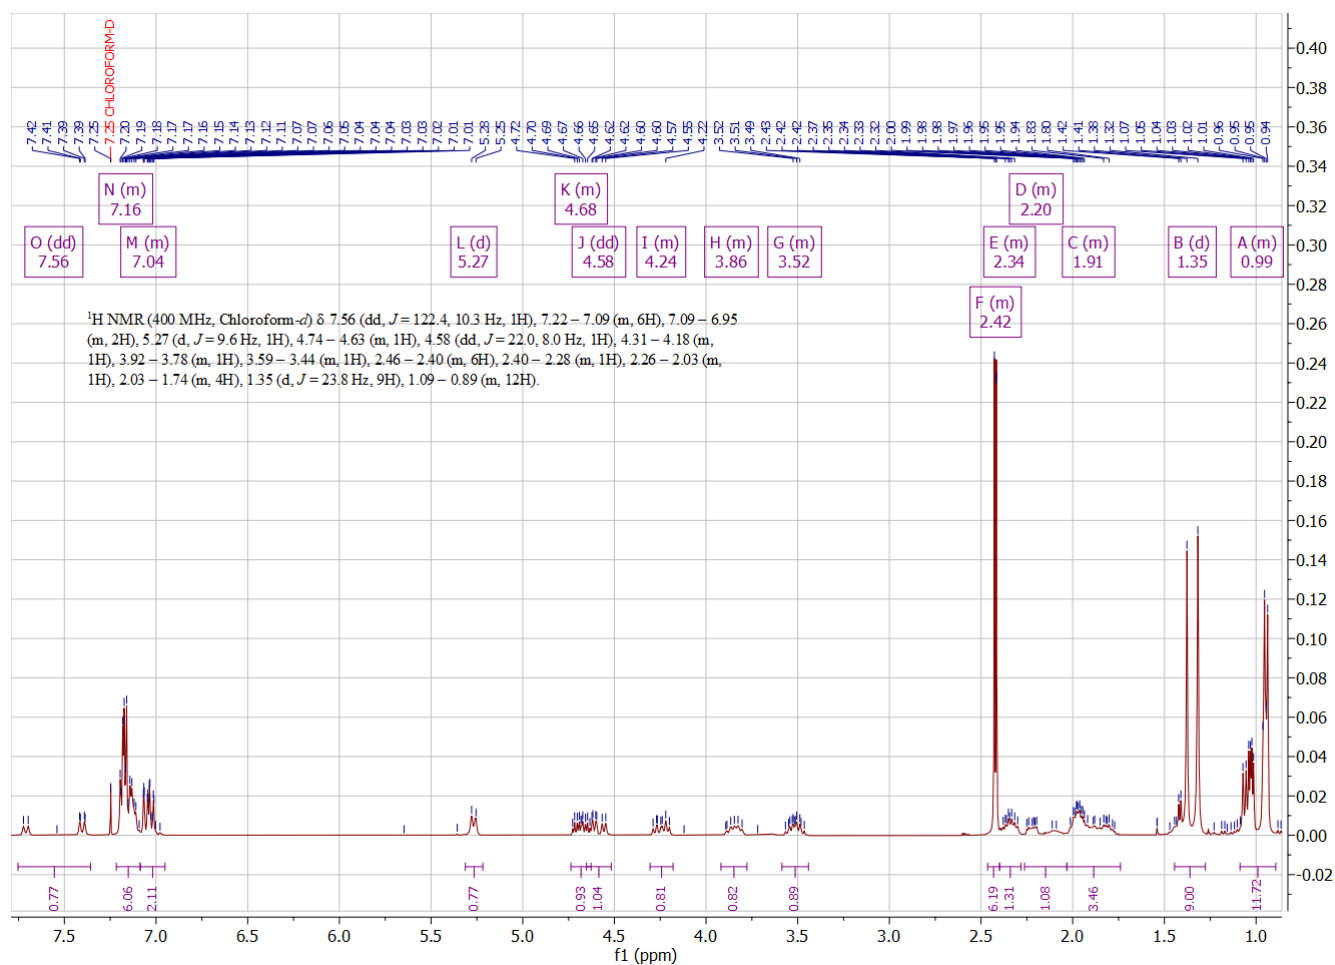

**(68) Boc-L-Tle-L-Pro-Val<sup>P</sup>(OPh-4-SCH<sub>3</sub>)<sub>2</sub>**

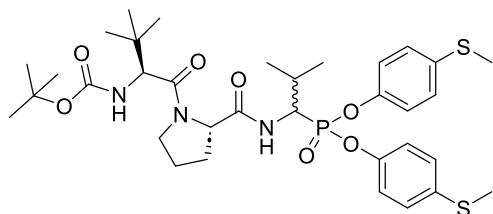

**Name:** *tert*-butyl ((2*S*)-1-((2*S*)-2-((1-(bis(4-(methylthio)phenoxy)phosphoryl)-2-methylpropyl)carbamoyl)pyrrolidin-1-yl)-3,3-dimethyl-1-oxobutan-2-yl)carbamate

<sup>31</sup>P NMR (162 MHz, Chloroform-*d*) δ 18.70 (s, 35%), 18.16 (s, 65%).

<sup>1</sup>H NMR (400 MHz, Chloroform-*d*) δ 7.28 (dd, *J* = 28.3, 9.8 Hz, 1H, NH), 7.20 – 7.13 (m, 4H, 4xArH), 7.13 – 7.02 (m, 4H, 4xArH), 5.30 (dd, *J* = 41.6, 9.9 Hz, 1H, NH), 4.76 – 4.65 (m, 1H, CHP), 4.47 (dd, *J* = 8.1, 3.4 Hz, 1H, CH), 4.35 – 4.25 (m, 1H, CH), 3.90 – 3.54 (m, 2H, CH<sub>2</sub>), 2.46 – 2.41 (m, 6H, 2xSCH<sub>3</sub>), 2.40 – 2.29 (m, 1H, CH), 2.22 – 1.77 (m, 4H, 2xCH<sub>2</sub>), 1.41 (d, *J* = 2.6 Hz, 9H, Boc), 1.13 – 0.91 (m, 15H, 5xCH<sub>3</sub>).

**HRMS:** C<sub>34</sub>H<sub>50</sub>N<sub>3</sub>O<sub>7</sub>PS<sub>2</sub> [M+Na]<sup>+</sup> calc. 730.2725 found 730.2714

**HPLC:** purity >99%; retention time 19.713 min

**Chromatogram**

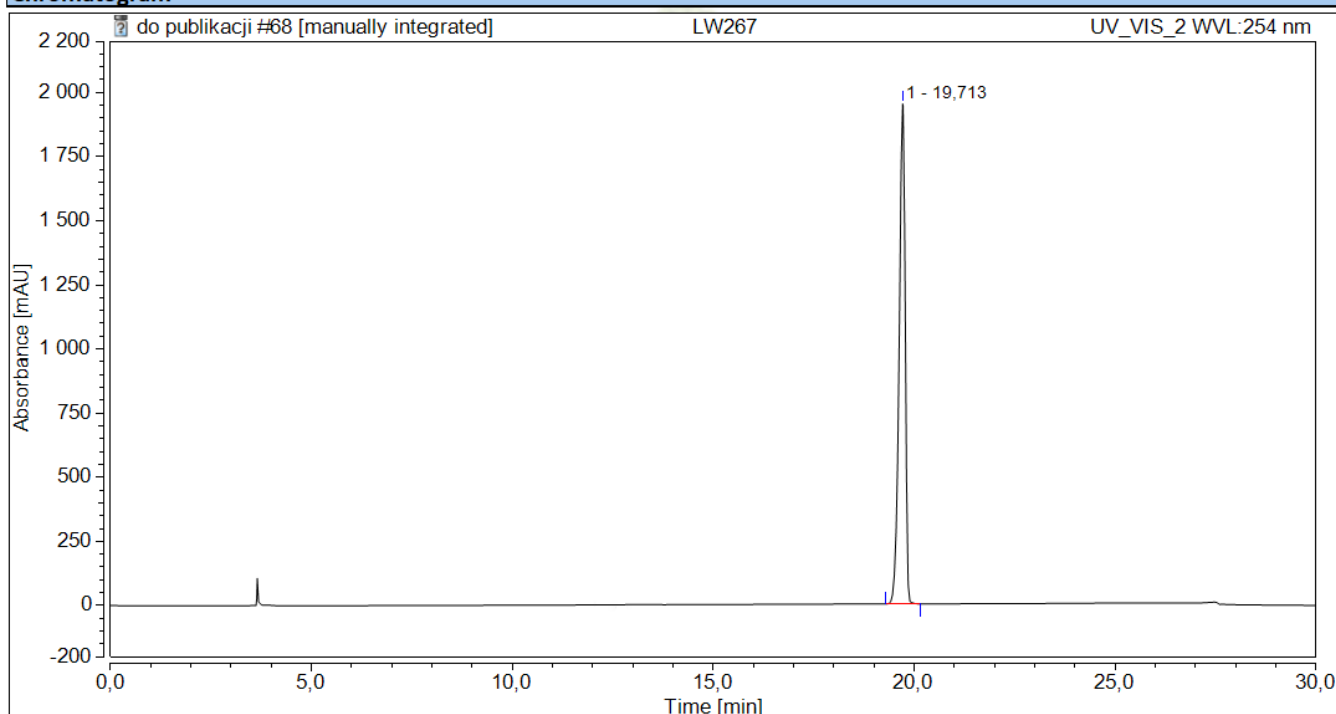

**Integration Results**

| No.           | Peak Name | Retention Time<br>min | Area<br>mAU*min | Height<br>mAU   | Relative Area<br>% | Relative Height<br>% | Amount<br>n.a. |
|---------------|-----------|-----------------------|-----------------|-----------------|--------------------|----------------------|----------------|
| 1             |           | 19,713                | 339,869         | 1949,761        | 100,00             | 100,00               | n.a.           |
| <b>Total:</b> |           |                       | <b>339,869</b>  | <b>1949,761</b> | <b>100,00</b>      | <b>100,00</b>        |                |

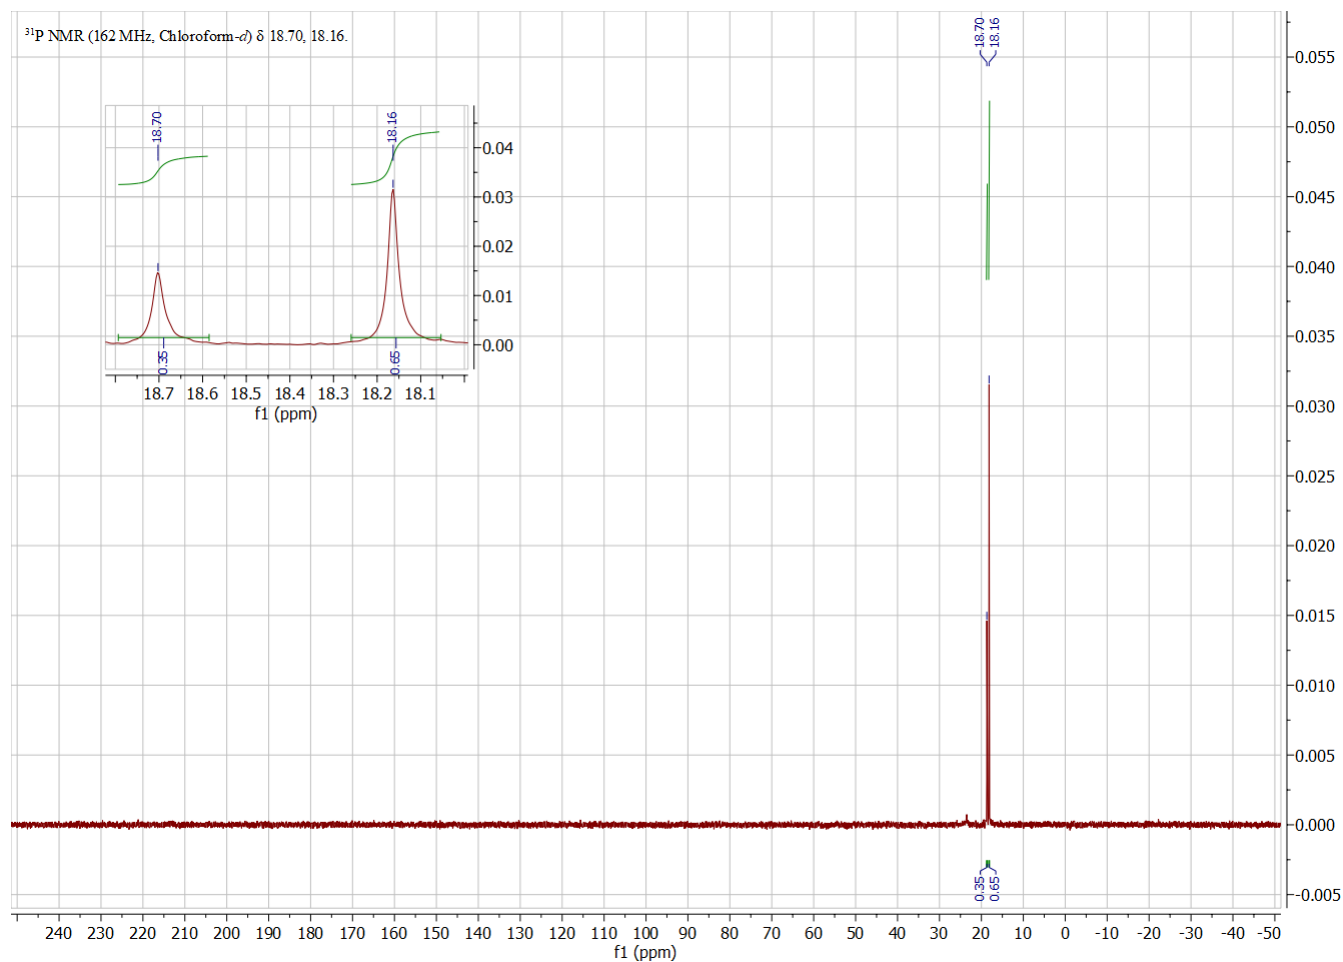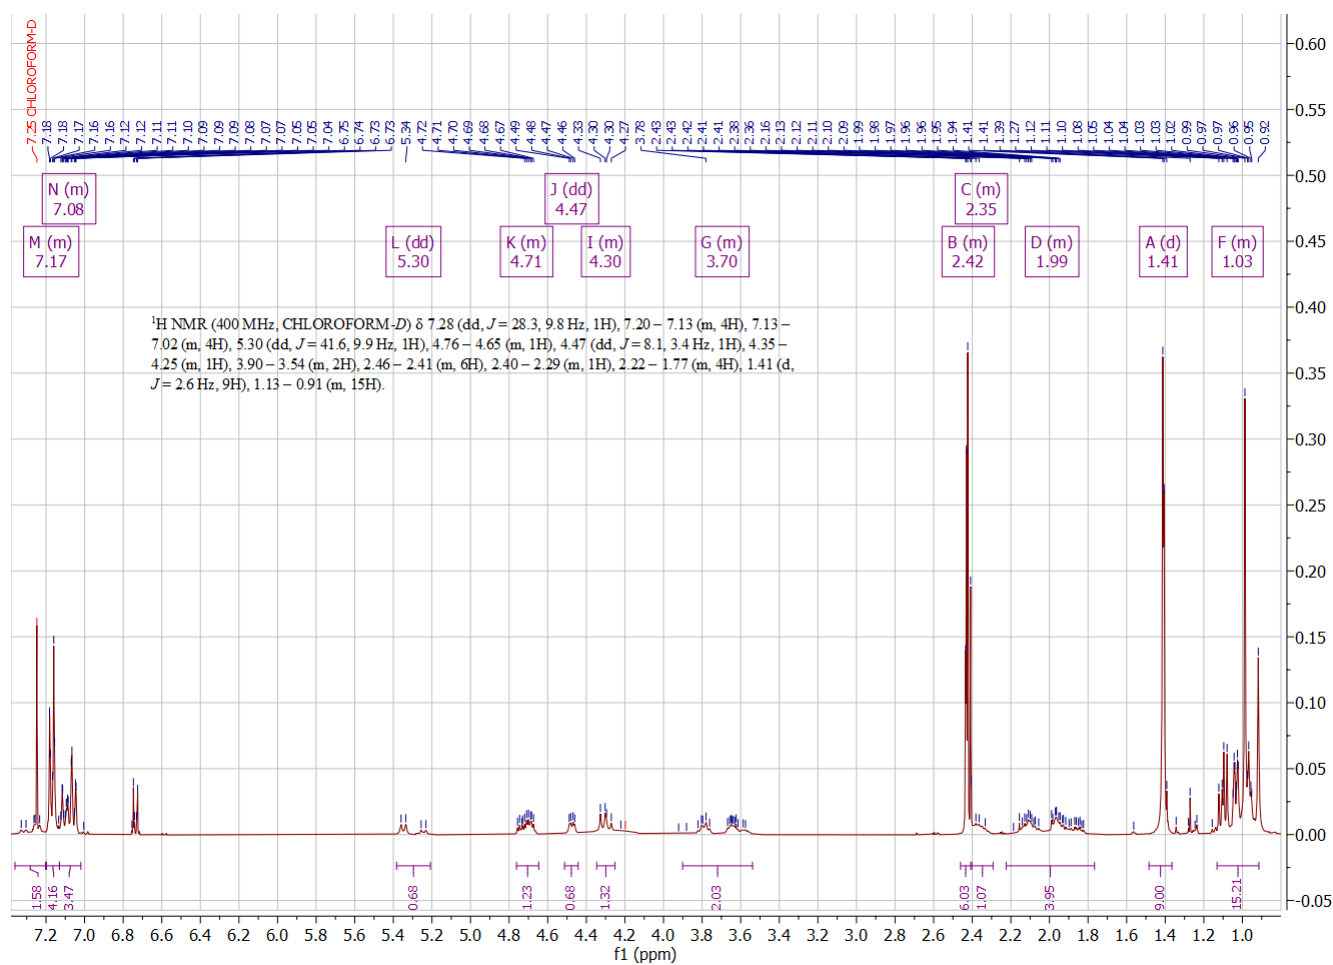

**(69) Boc-D-Tle-L-Pro- Val<sup>P</sup>(OPh-4-SCH<sub>3</sub>)<sub>2</sub>**

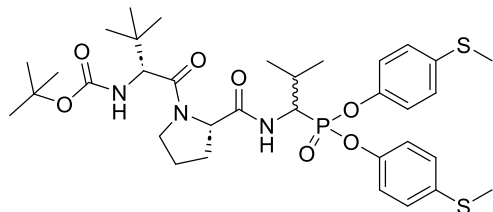

**Name:** *tert*-butyl ((2*R*)-1-((2*S*)-2-((1-(bis(4-(methylthio)phenoxy)phosphoryl)-2-methylpropyl)carbamoyl)pyrrolidin-1-yl)-3,3-dimethyl-1-oxobutan-2-yl)carbamate

<sup>31</sup>P NMR (162 MHz, Chloroform-*d*) δ 18.27 (s, 54%), 18.12 (s, 46%).

<sup>1</sup>H NMR (400 MHz, Chloroform-*d*) δ 7.59 (dd, *J* = 197.2, 10.6 Hz, 1H, NH), 7.23 – 7.09 (m, 6H, 6xArH), 7.09 – 6.94 (m, 2H, 2xArH), 5.30 (d, *J* = 9.4 Hz, 1H, NH), 4.75 – 4.63 (m, 1H, CHP), 4.63 – 4.55 (m, 1H, CH), 4.33 (dd, *J* = 23.3, 9.2 Hz, 1H, CH), 3.93 – 3.80 (m, 1H, 0.5xCH<sub>2</sub>), 3.66 – 3.53 (m, 1H, 0.5xCH<sub>2</sub>), 2.43 (d, *J* = 4.7 Hz, 6H, 2xSCH<sub>3</sub>), 2.41 – 2.16 (m, 2H, 0.5xCH<sub>2</sub>, CH), 2.16 – 1.73 (m, 3H, 1.5xCH<sub>2</sub>), 1.35 (d, *J* = 27.9 Hz, 9H, Boc), 1.10 – 0.93 (m, 15H, 5xCH<sub>3</sub>).

**HRMS:** C<sub>34</sub>H<sub>50</sub>N<sub>3</sub>O<sub>7</sub>PS<sub>2</sub> [M+Na]<sup>+</sup> calc. 730.2725 found 730.2716

**HPLC:** purity >99%; retention time 19.860 min

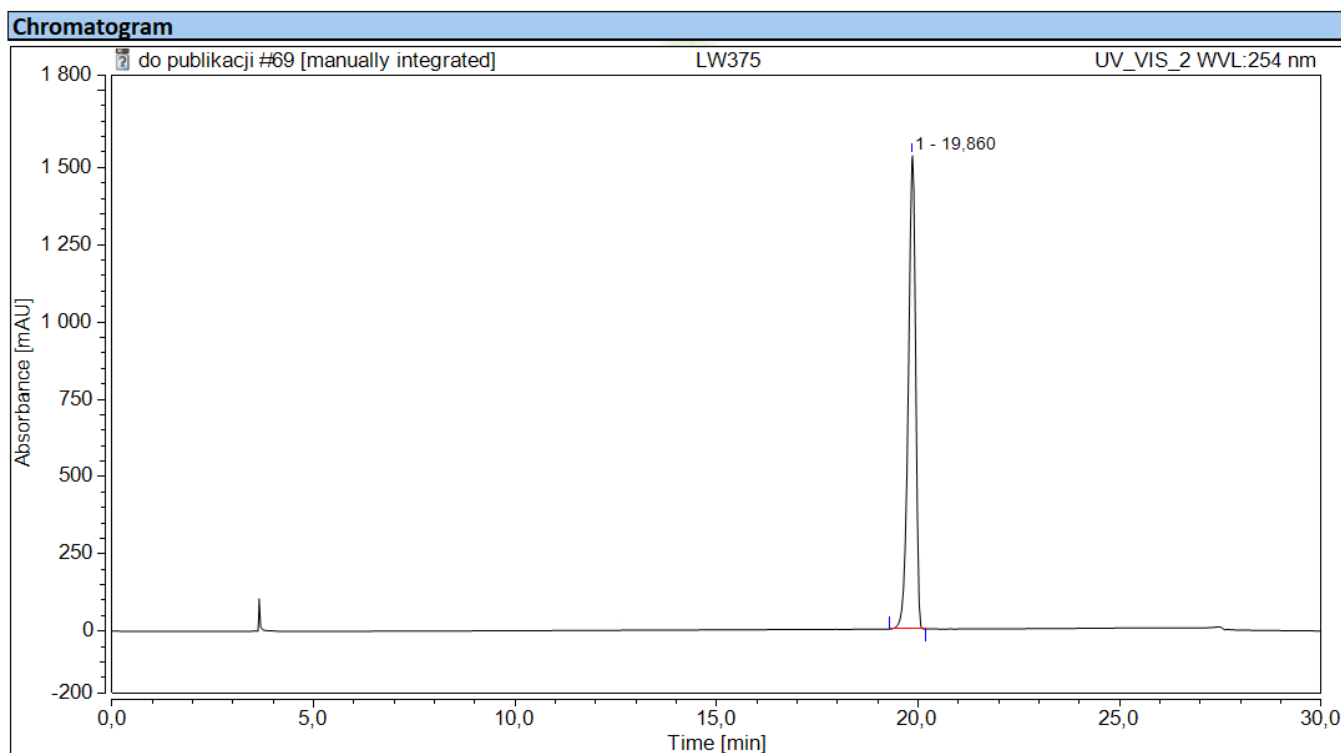

| Integration Results |           |                       |                 |                 |                    |                      |                |
|---------------------|-----------|-----------------------|-----------------|-----------------|--------------------|----------------------|----------------|
| No.                 | Peak Name | Retention Time<br>min | Area<br>mAU*min | Height<br>mAU   | Relative Area<br>% | Relative Height<br>% | Amount<br>n.a. |
| 1                   |           | 19,860                | 320,962         | 1531,024        | 100,00             | 100,00               | n.a.           |
| <b>Total:</b>       |           |                       | <b>320,962</b>  | <b>1531,024</b> | <b>100,00</b>      | <b>100,00</b>        |                |

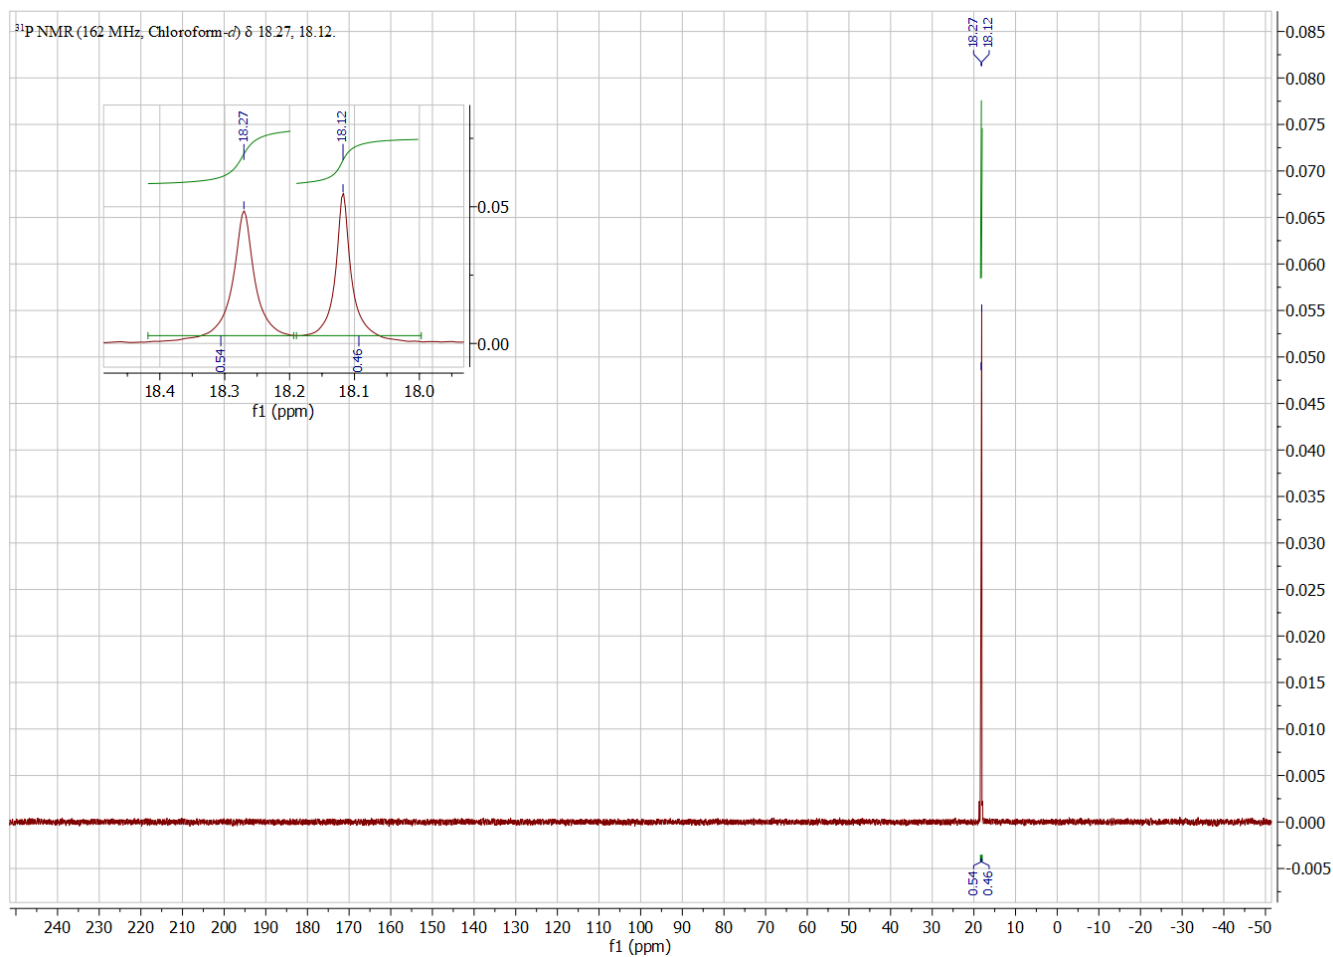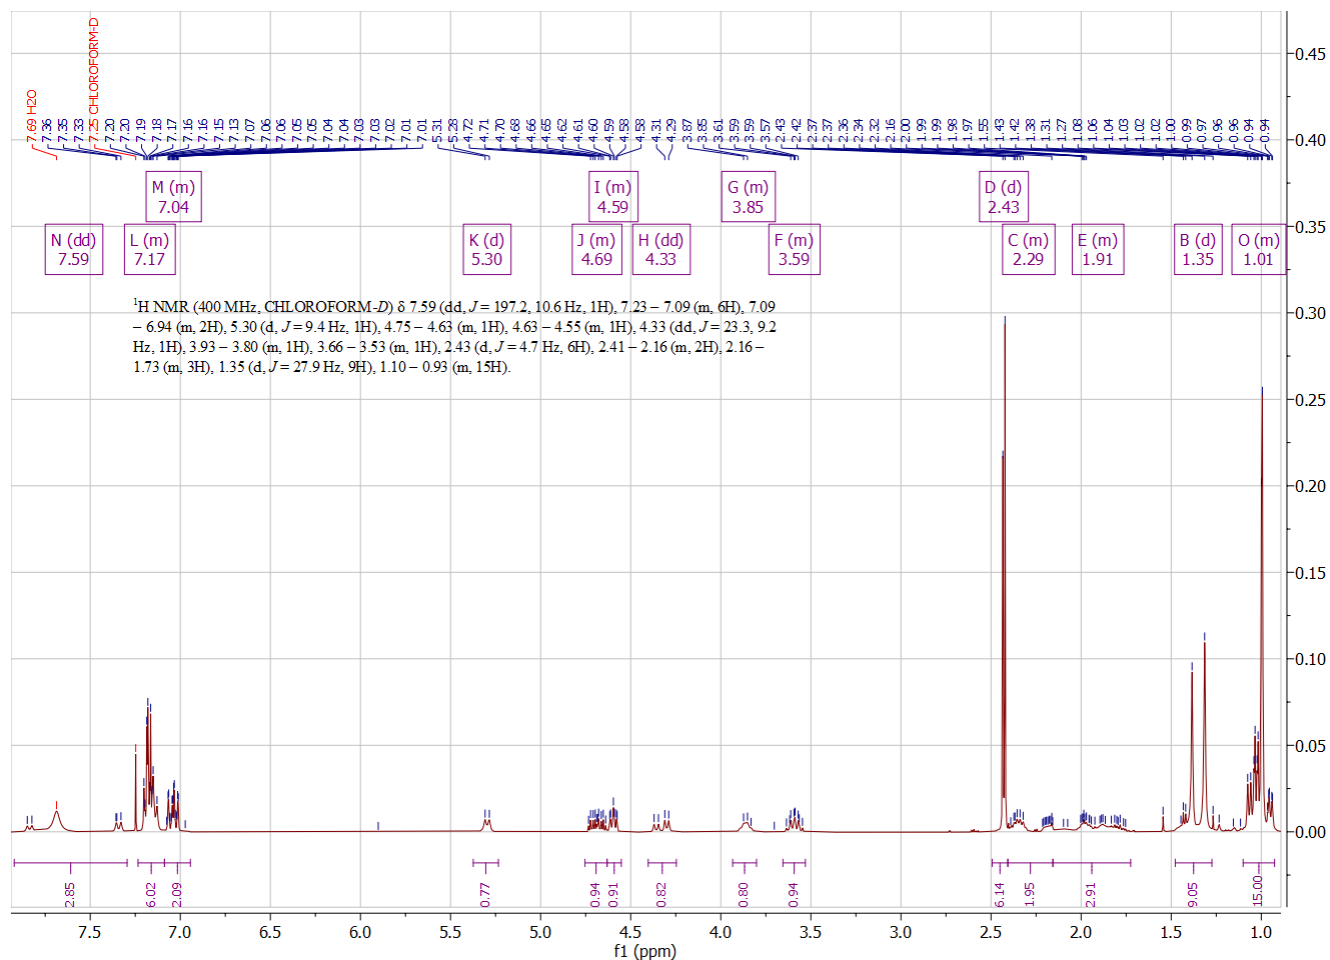

**(70) Boc-L-Nle-L-Pro-Val<sup>P</sup>(OPh-4-SCH<sub>3</sub>)<sub>2</sub>**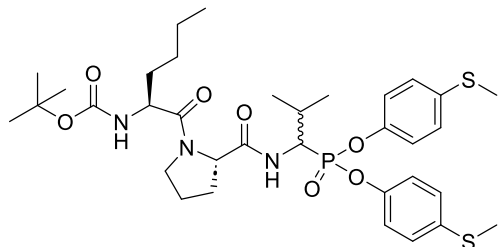

**Name:** *tert*-butyl ((2*S*)-1-((2*S*)-2-((1-(bis(4-(methylthio)phenoxy)phosphoryl)-2-methylpropyl)carbamoyl)pyrrolidin-1-yl)-1-oxohexan-2-yl)carbamate

<sup>31</sup>P NMR (162 MHz, Chloroform-*d*) δ 18.46 (s, 50%), 17.99 (s, 50%).

<sup>1</sup>H NMR (400 MHz, Chloroform-*d*) δ 7.40 (dd, *J* = 17.8, 10.3 Hz, 1H, NH), 7.23 – 6.99 (m, 8H, 8xArH), 5.27 (dd, *J* = 47.8, 8.7 Hz, 1H, NH), 4.77 – 4.49 (m, 2H, CHP, CH), 4.46 – 4.29 (m, 1H, CH), 3.80 – 3.42 (m, 2H, CH<sub>2</sub>), 2.43 (d, *J* = 2.4 Hz, 6H, 2xSCH<sub>3</sub>), 2.40 – 2.32 (m, 1H, CH), 2.22 – 1.80 (m, 3H, 1.5xCH<sub>2</sub>), 1.70 – 1.44 (m, 2H, CH<sub>2</sub>), 1.41 (d, *J* = 1.8 Hz, 9H, Boc), 1.38 – 1.09 (m, 5H, 2.5xCH<sub>2</sub>), 1.09 – 0.94 (m, 6H, 2xCH<sub>3</sub>), 0.81 (dt, *J* = 45.9, 7.1 Hz, 3H, CH<sub>3</sub>).

**HRMS:** C<sub>34</sub>H<sub>50</sub>N<sub>3</sub>O<sub>7</sub>PS<sub>2</sub> [M+Na]<sup>+</sup> calc. 730.2725 found 730.2683

**HPLC:** purity >99%; retention time 19.643 min

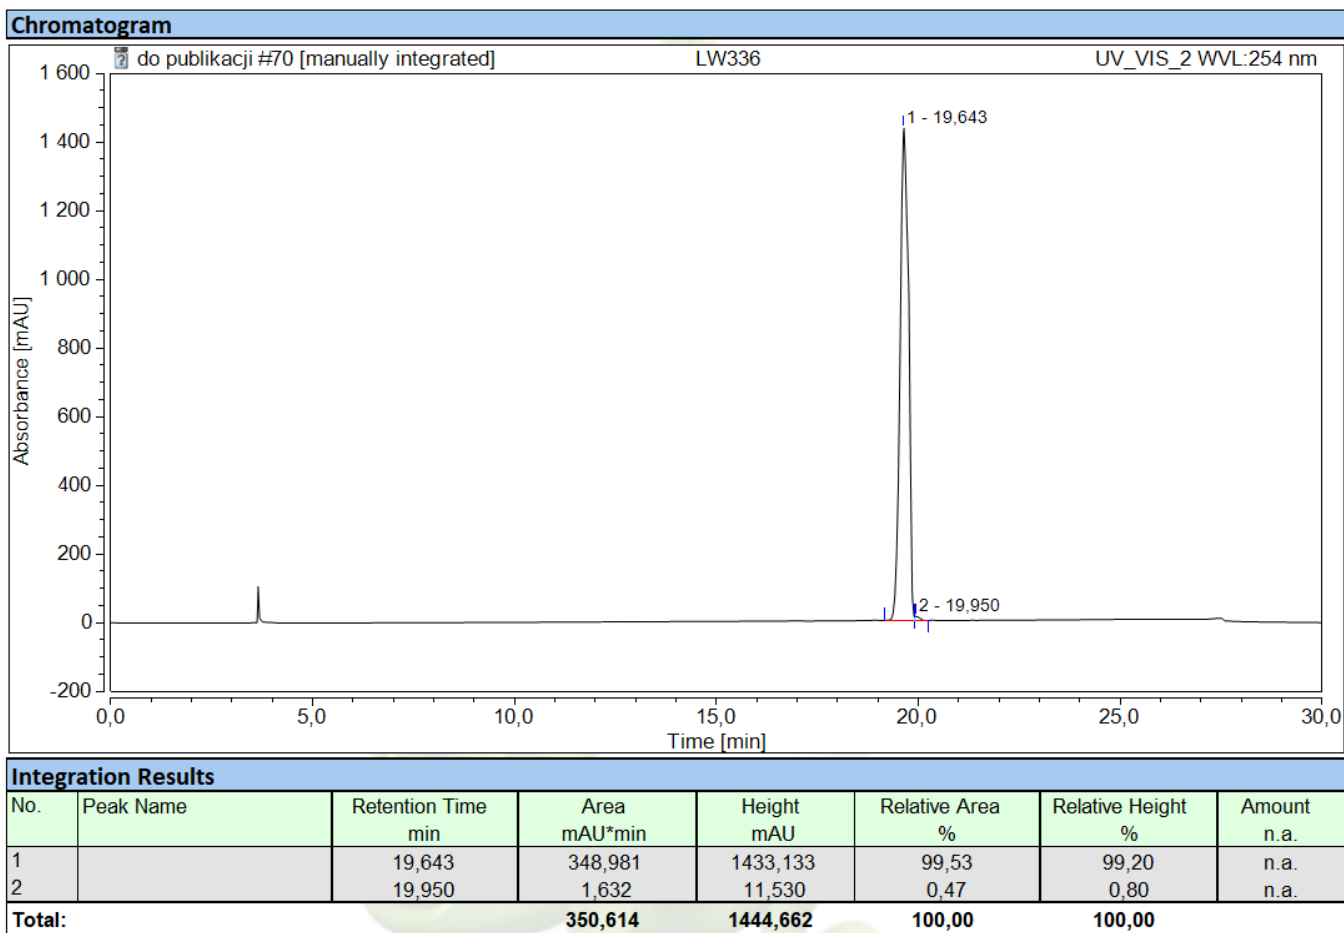

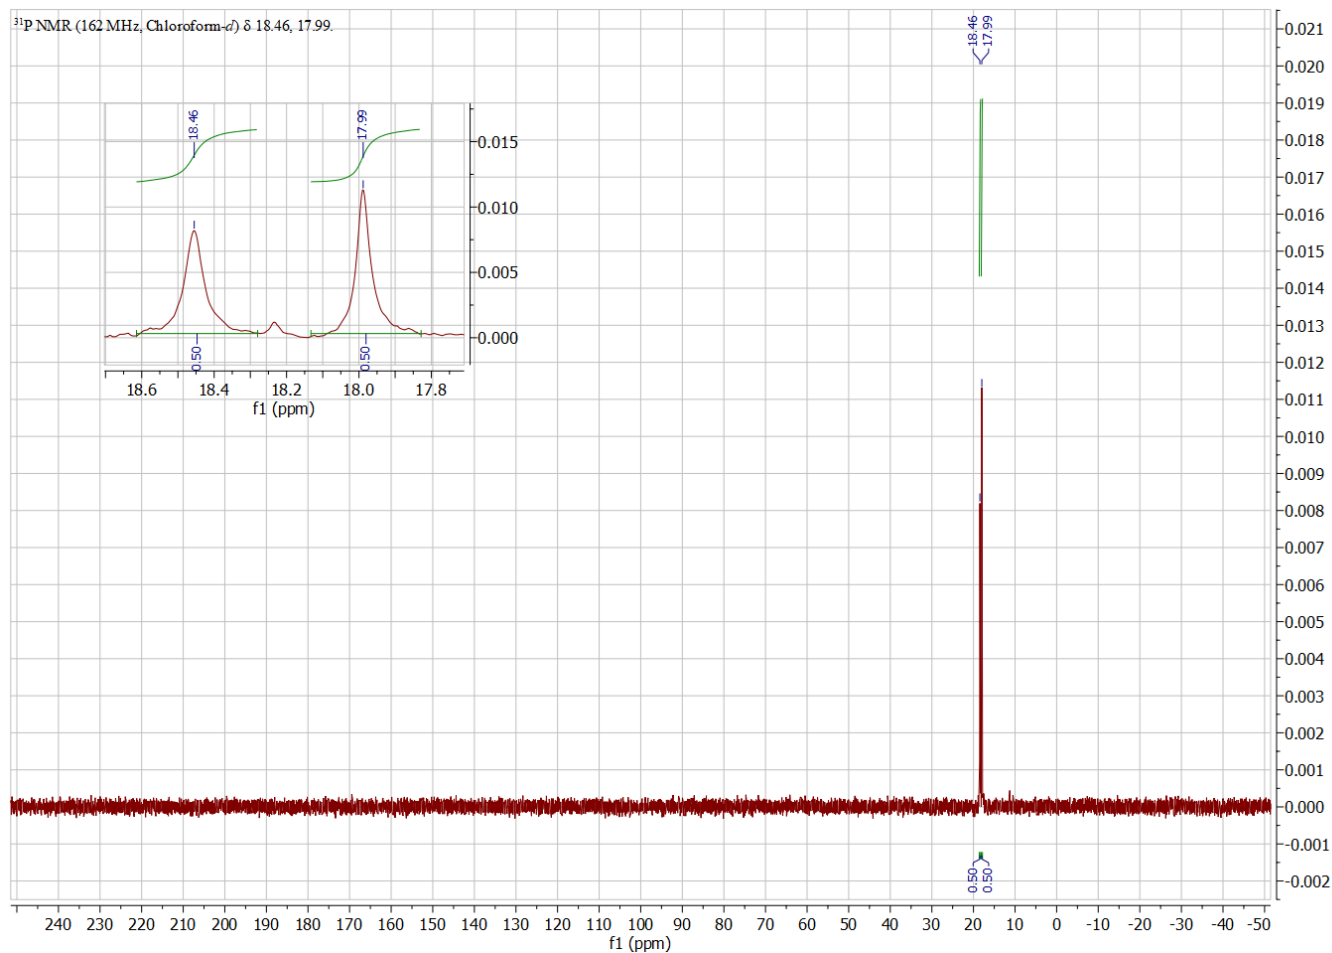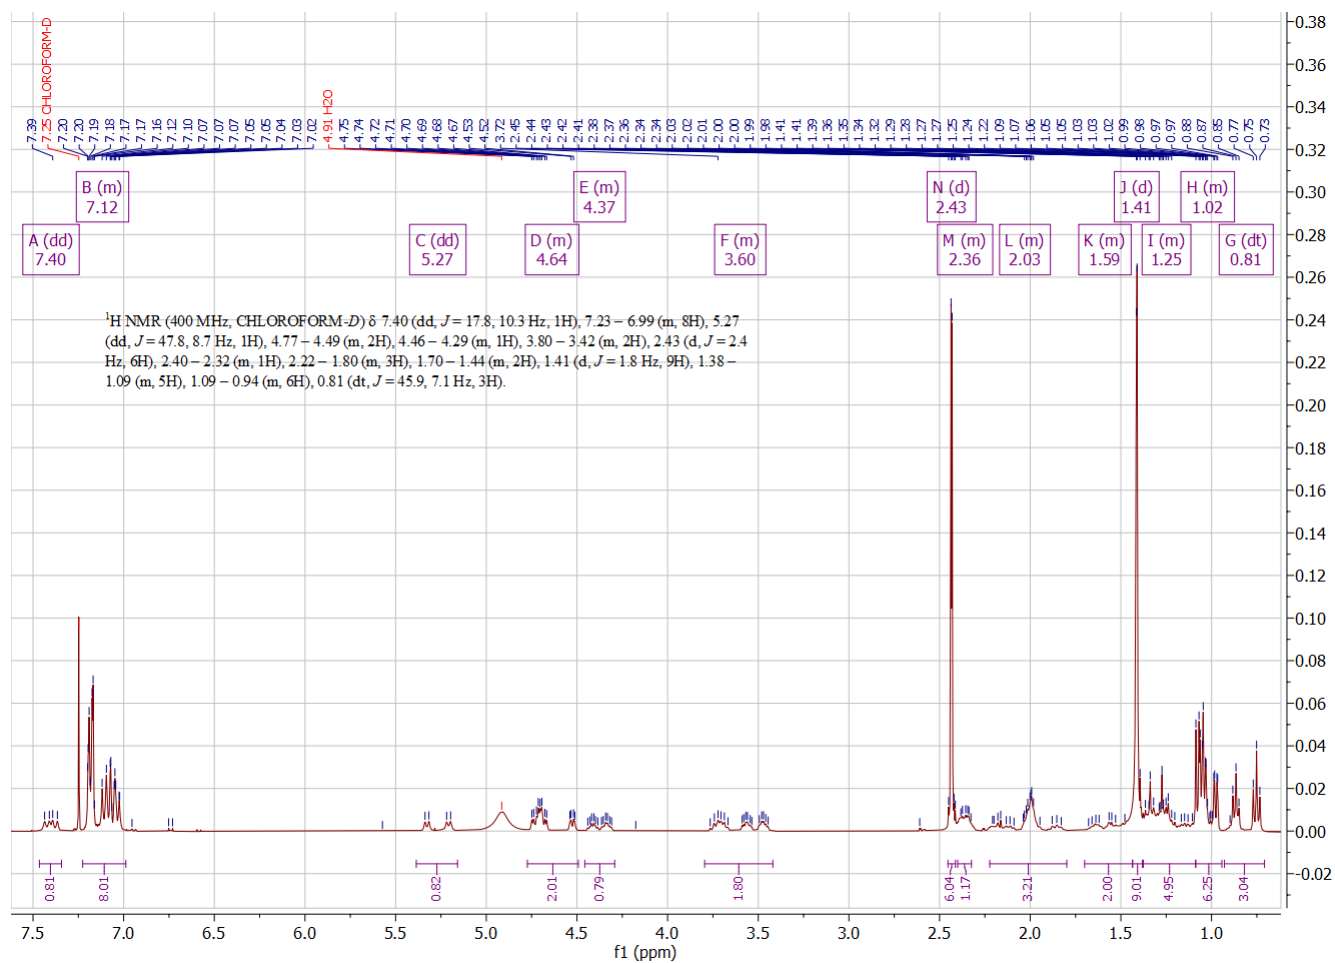

**(71) Boc-D-Nle-L-Pro-Val<sup>P</sup>(OPh-4-SCH<sub>3</sub>)<sub>2</sub>**

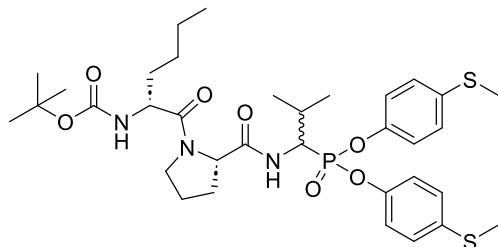

**Name:** *tert*-butyl ((2R)-1-((2S)-2-((1-(bis(4-(methylthio)phenoxy)phosphoryl)-2-methylpropyl)carbamoyl)pyrrolidin-1-yl)-1-oxohexan-2-yl)carbamate

<sup>31</sup>P NMR (162 MHz, Chloroform-d) δ 18.63 (s, 51%), 18.31 (s, 49%).

<sup>1</sup>H NMR (400 MHz, Chloroform-d) δ 7.58 (dd, J = 89.6, 10.0 Hz, 1H, NH), 7.22 – 7.12 (m, 6H, 6xArH), 7.09 – 7.01 (m, 2H, 2xArH), 5.20 (dd, J = 12.0, 8.4 Hz, 1H, NH), 4.70 – 4.51 (m, 2H, CHP, CH), 4.49 – 4.32 (m, 1H, CH), 3.87 – 3.69 (m, 1H, 0.5xCH<sub>2</sub>), 3.52 – 3.38 (m, 1H, 0.5xCH<sub>2</sub>), 2.43 (d, J = 5.7 Hz, 6H, 2xSCH<sub>3</sub>), 2.41 – 2.20 (m, 2H, 0.5xCH<sub>2</sub>, CH), 2.18 – 1.74 (m, 3H, 1.5xCH<sub>2</sub>), 1.73 – 1.41 (m, 3H, 1.5xCH<sub>2</sub>), 1.35 (d, J = 20.5 Hz, 9H, Boc), 1.32 – 1.20 (m, 3H, 1.5xCH<sub>2</sub>), 1.11 – 0.94 (m, 6H, 2xCH<sub>3</sub>), 0.92 – 0.84 (m, 3H, CH<sub>3</sub>).

**HRMS:** C<sub>34</sub>H<sub>50</sub>N<sub>3</sub>O<sub>7</sub>PS<sub>2</sub> [M+Na]<sup>+</sup> calc. 730.2725 found 730.2729

**HPLC:** purity >99%; retention time 19.620 min

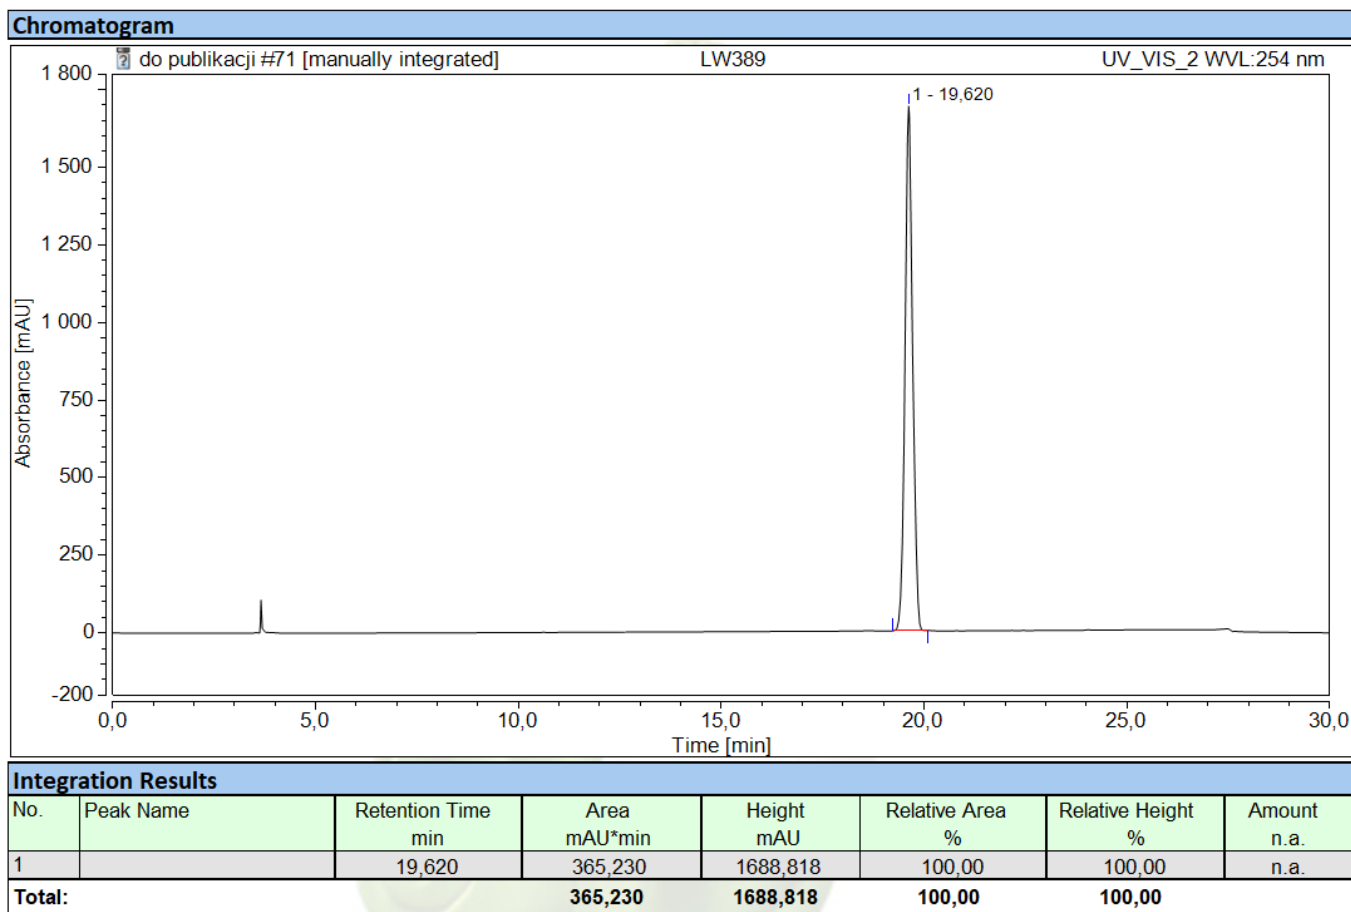



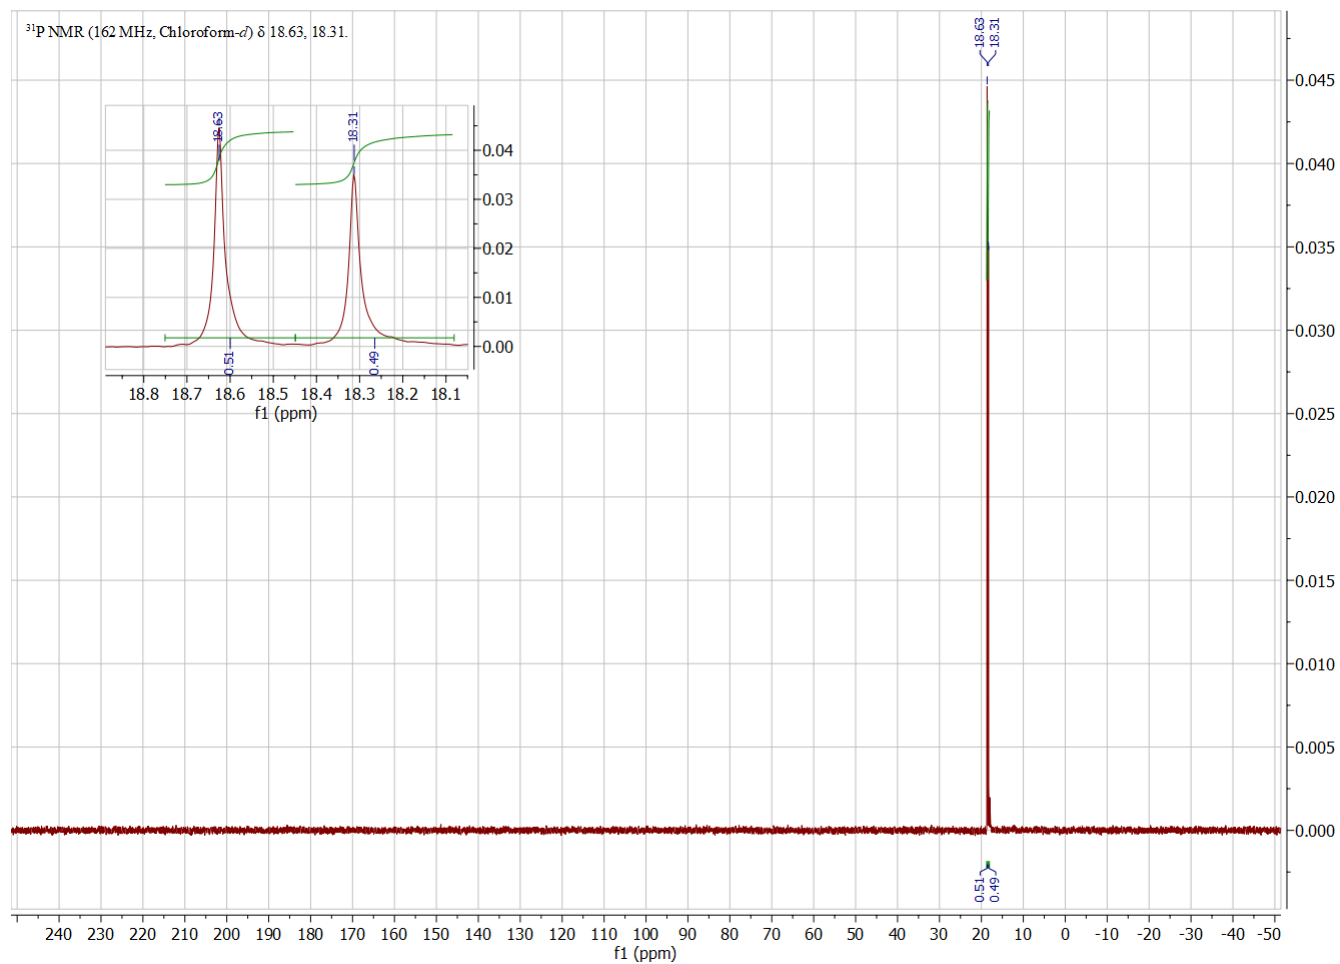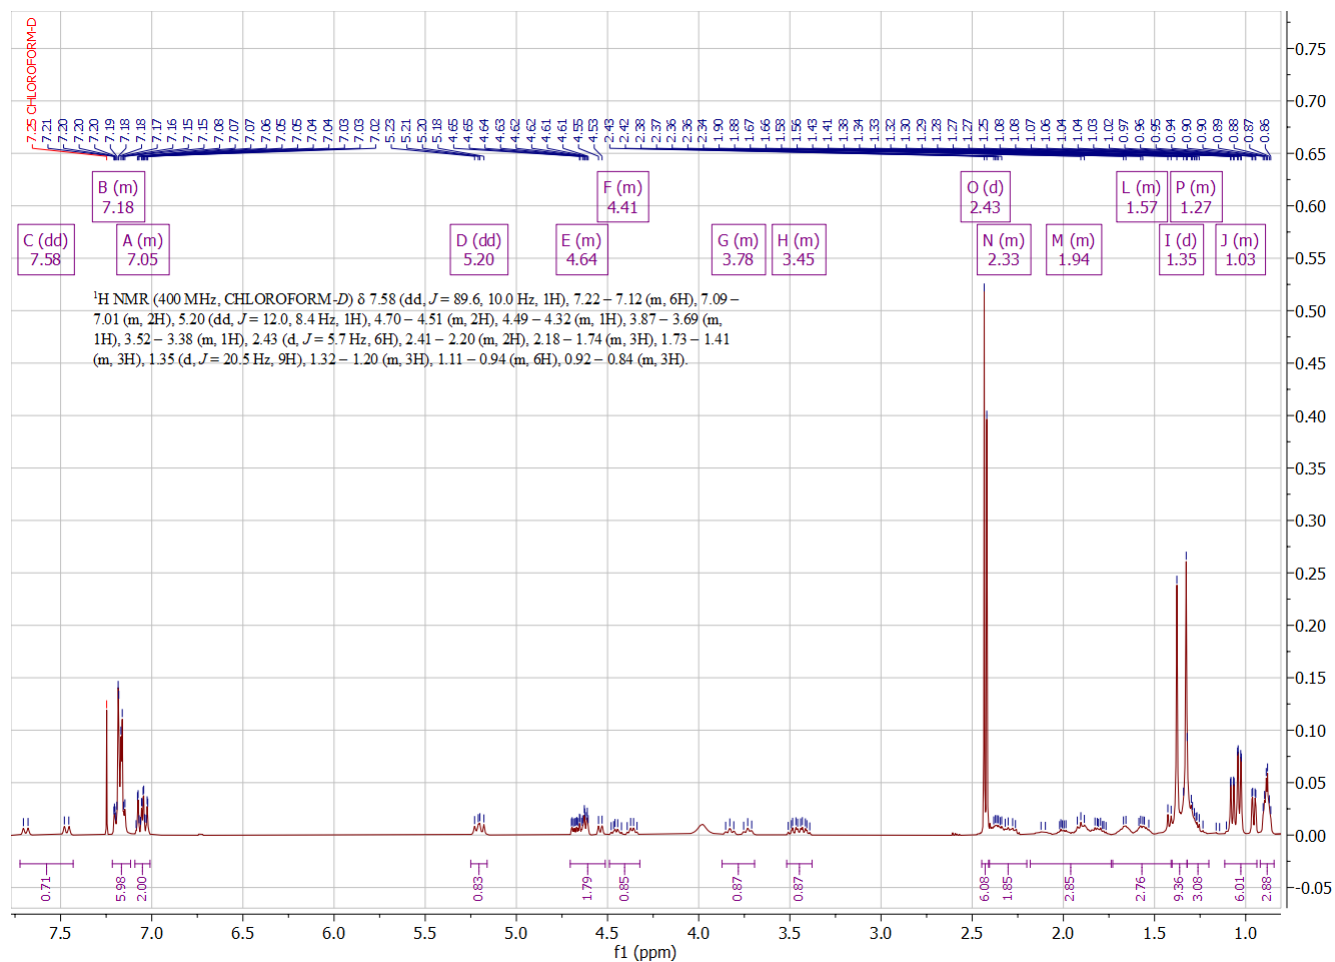

**(72) Boc-L-Leu-L-Pro- Val<sup>P</sup>(OPh-4-SCH<sub>3</sub>)<sub>2</sub>**

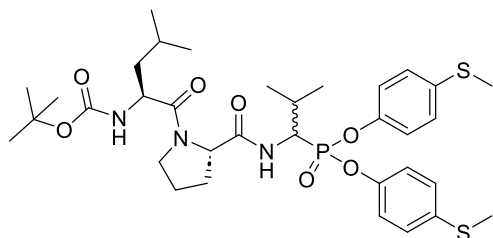

**Name:** *tert*-butyl ((2*S*)-1-((2*S*)-2-((1-(bis(4-(methylthio)phenoxy)phosphoryl)-2-methylpropyl)carbamoyl)pyrrolidin-1-yl)-4-methyl-1-oxopentan-2-yl)carbamate

<sup>31</sup>P NMR (162 MHz, Chloroform-*d*) δ 18.51 (s, 55%), 18.04 (s, 45%).

<sup>1</sup>H NMR (400 MHz, Chloroform-*d*) δ 7.43 (dd, *J* = 36.3, 9.9 Hz, 1H, NH), 7.24 – 7.15 (m, 4H, 4xArH), 7.15 – 7.00 (m, 4H, 4xArH), 5.18 (dd, *J* = 49.4, 8.9 Hz, 1H, NH), 4.76 – 4.69 (m, 1H, CHP), 4.69 – 4.51 (m, 1H, CH), 4.51 – 4.36 (m, 1H, CH), 3.78 – 3.64 (m, 1H, 0.5xCH<sub>2</sub>), 3.58 – 3.39 (m, 1H, 0.5xCH<sub>2</sub>), 2.43 (d, *J* = 3.2 Hz, 6H, 2xSCH<sub>3</sub>), 2.39 – 2.31 (m, 1H, CH), 2.26 – 2.04 (m, 1H, CH), 2.04 – 1.85 (m, 2H, CH<sub>2</sub>), 1.85 – 1.45 (m, 2H, CH<sub>2</sub>), 1.41 (d, *J* = 1.4 Hz, 9H, Boc), 1.36 – 1.11 (m, 2H, CH<sub>2</sub>), 1.06 – 0.93 (m, 6H, 2xCH<sub>3</sub>), 0.99 (dd, *J* = 68.2, 6.8 Hz, 3H, CH<sub>3</sub>), 0.76 (dd, *J* = 58.0, 6.6 Hz, 3H, CH<sub>3</sub>).

**HRMS:** C<sub>34</sub>H<sub>50</sub>N<sub>3</sub>O<sub>7</sub>PS<sub>2</sub> [M+Na]<sup>+</sup> calc. 730.2725 found 730.2708

**HPLC:** purity >99%; retention time 19.523 and 19.667 min

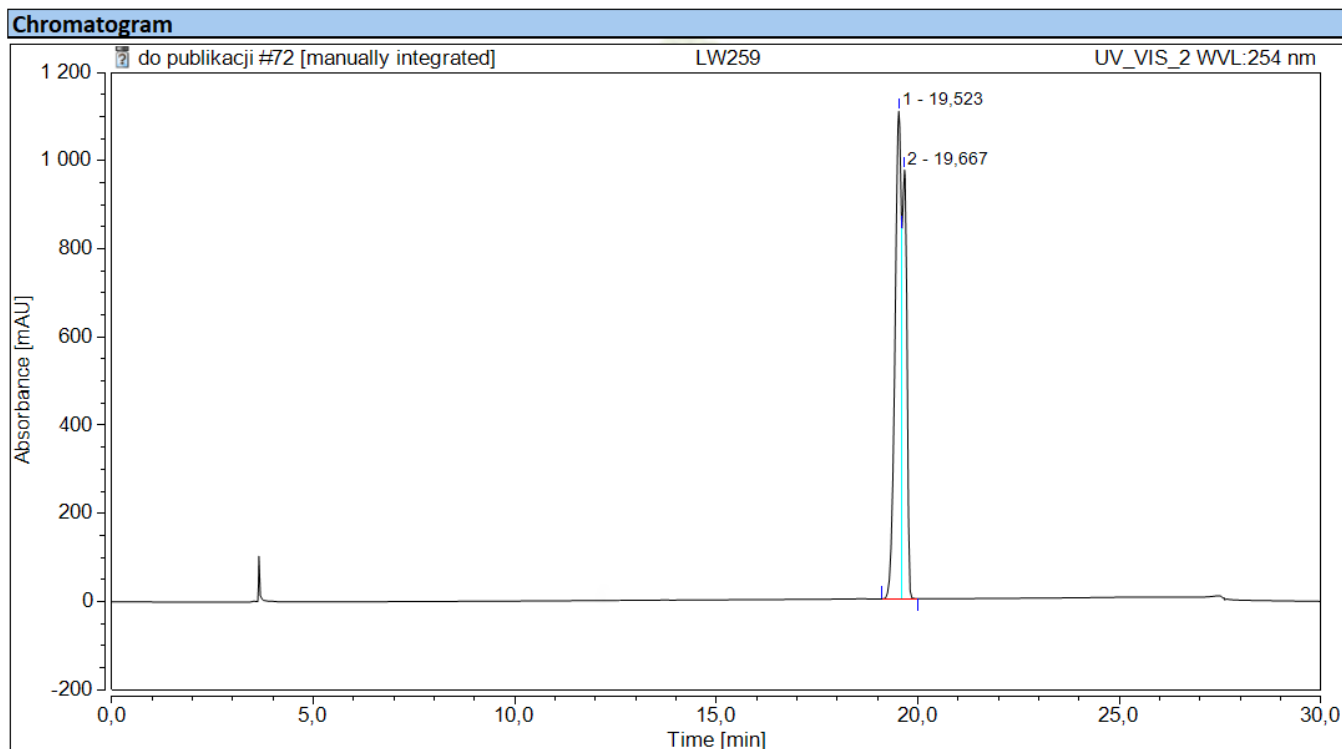

| Integration Results |           |                       |                 |               |                    |                      |                |
|---------------------|-----------|-----------------------|-----------------|---------------|--------------------|----------------------|----------------|
| No.                 | Peak Name | Retention Time<br>min | Area<br>mAU*min | Height<br>mAU | Relative Area<br>% | Relative Height<br>% | Amount<br>n.a. |
| 1                   |           | 19,523                | 199,505         | 1106,050      | 61,21              | 53,20                | n.a.           |
| 2                   |           | 19,667                | 126,434         | 972,904       | 38,79              | 46,80                | n.a.           |
| Total:              |           |                       | 325,939         | 2078,953      | 100,00             | 100,00               |                |

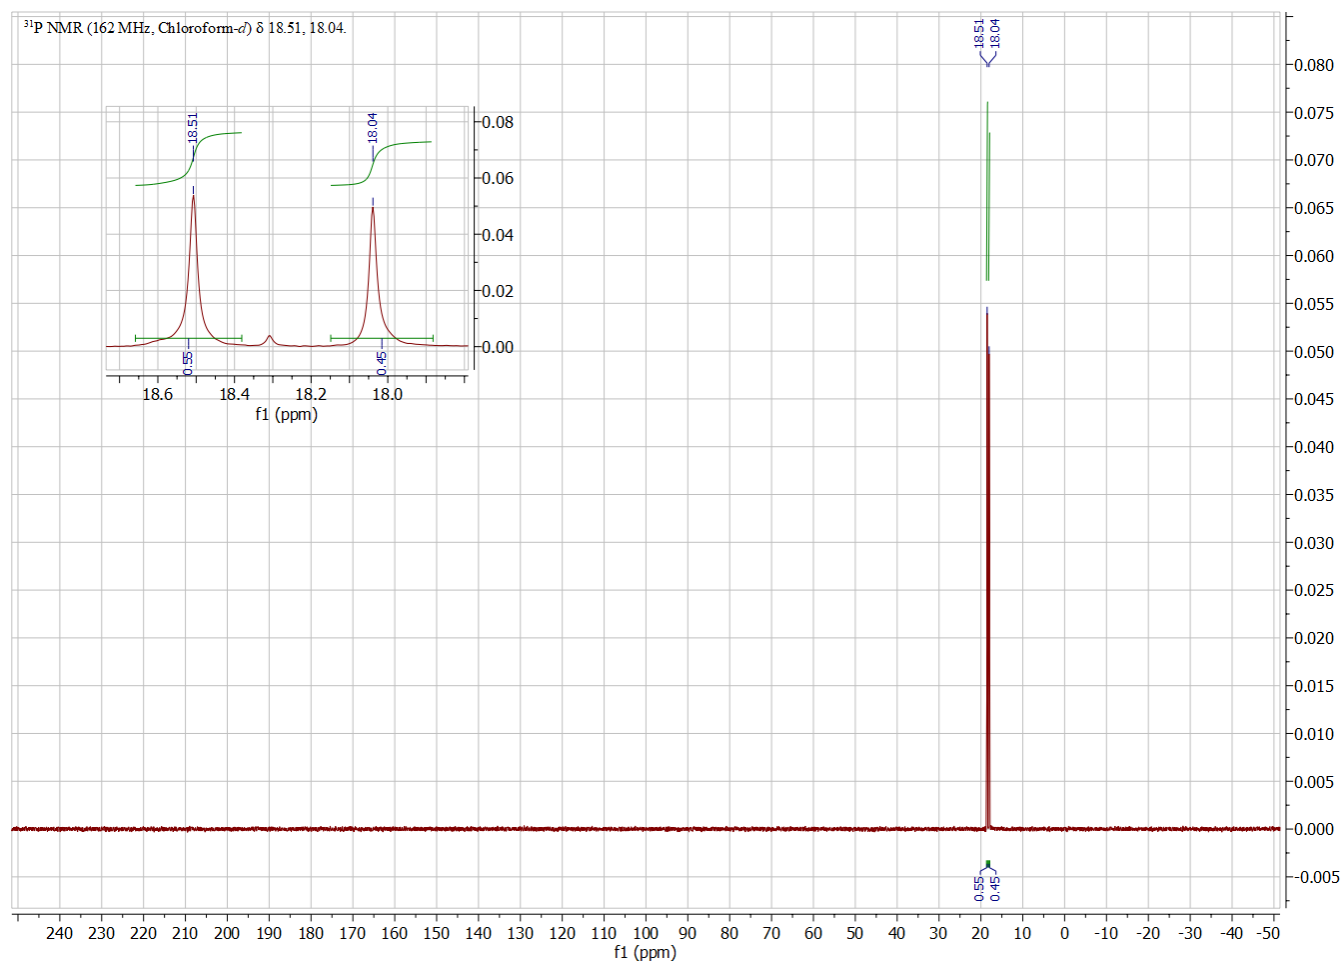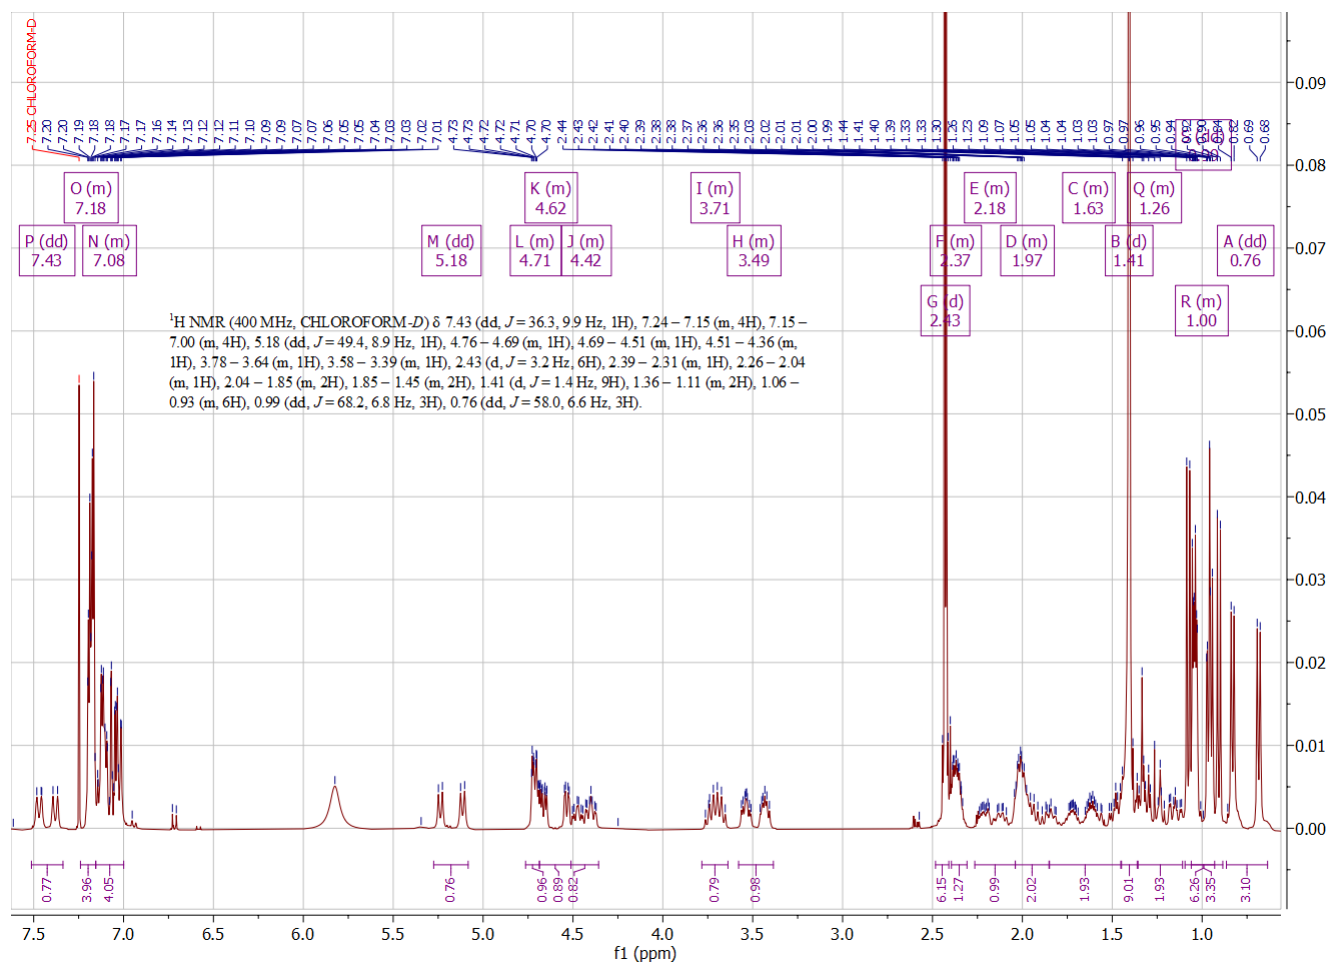

**(73) Boc-D-Leu-L-Pro-Val<sup>F</sup>(OPh-4-SCH<sub>3</sub>)<sub>2</sub>**

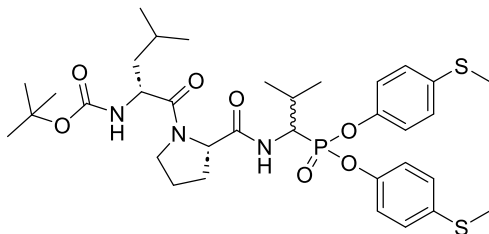

**Name:** *tert*-butyl ((2*R*)-1-((2*S*)-2-((1-(bis(4-(methylthio)phenoxy)phosphoryl)-2-methylpropyl)carbamoyl)pyrrolidin-1-yl)-4-methyl-1-oxopentan-2-yl)carbamate

**<sup>31</sup>P NMR** (162 MHz, Chloroform-*d*) δ 18.54 (s, 64%), 18.23 (s, 36%).

**<sup>1</sup>H NMR** (400 MHz, Chloroform-*d*) δ 7.56 (dd, *J* = 111.5, 10.2 Hz, 1H, NH), 7.23 – 7.10 (m, 6H, 6xArH), 7.10 – 7.00 (m, 2H, 2xArH), 5.19 (td, *J* = 8.3, 8.3 Hz, 1H, NH), 4.73 – 4.62 (m, 1H, CHP), 4.62 – 4.53 (m, 1H, CH), 4.53 – 4.37 (m, 1H, CH), 3.90 – 3.75 (m, 1H, 0.5xCH<sub>2</sub>), 3.51 – 3.36 (m, 1H, 0.5xCH<sub>2</sub>), 2.43 (d, *J* = 4.7 Hz, 6H, 2xSCH<sub>3</sub>), 2.41 – 2.28 (m, 1H, CH), 2.28 – 2.07 (m, 1H, CH), 2.05 – 1.82 (m, 2H, 2xCH<sub>2</sub>), 1.82 – 1.39 (m, 4H, 2xCH<sub>2</sub>), 1.35 (d, *J* = 17.5 Hz, 9H, Boc), 1.10 – 0.90 (m, 12H, 4xCH<sub>3</sub>).

**HRMS:** C<sub>34</sub>H<sub>50</sub>N<sub>3</sub>O<sub>7</sub>PS<sub>2</sub> [M+Na]<sup>+</sup> calc. 730.2725 found 730.2708

**HPLC:** purity >99%; retention time 19.597 and 19.780 min

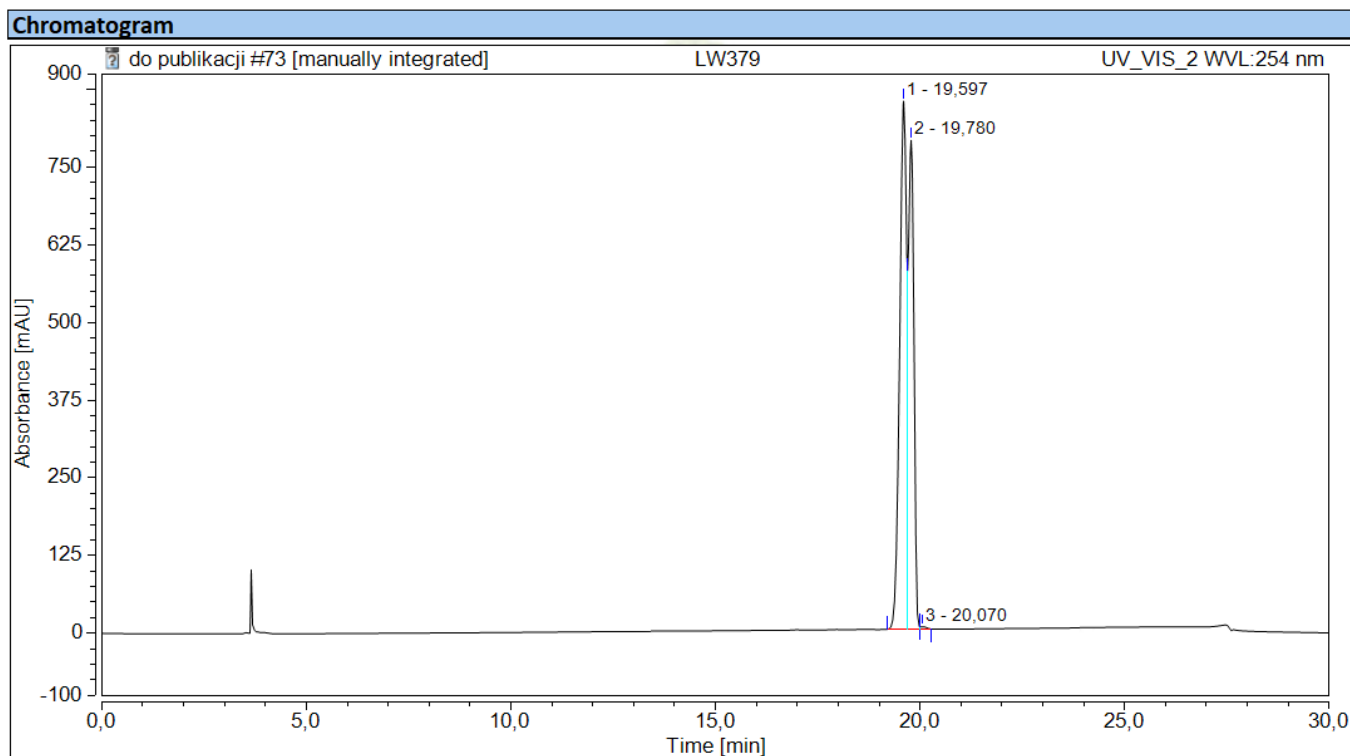

| Integration Results |           |                    |              |            |                 |                   |             |
|---------------------|-----------|--------------------|--------------|------------|-----------------|-------------------|-------------|
| No.                 | Peak Name | Retention Time min | Area mAU*min | Height mAU | Relative Area % | Relative Height % | Amount n.a. |
| 1                   |           | 19,597             | 164,217      | 849,469    | 56,93           | 51,81             | n.a.        |
| 2                   |           | 19,780             | 123,581      | 786,363    | 42,84           | 47,96             | n.a.        |
| 3                   |           | 20,070             | 0,679        | 3,862      | 0,24            | 0,24              | n.a.        |
| Total:              |           |                    | 288,476      | 1639,694   | 100,00          | 100,00            |             |

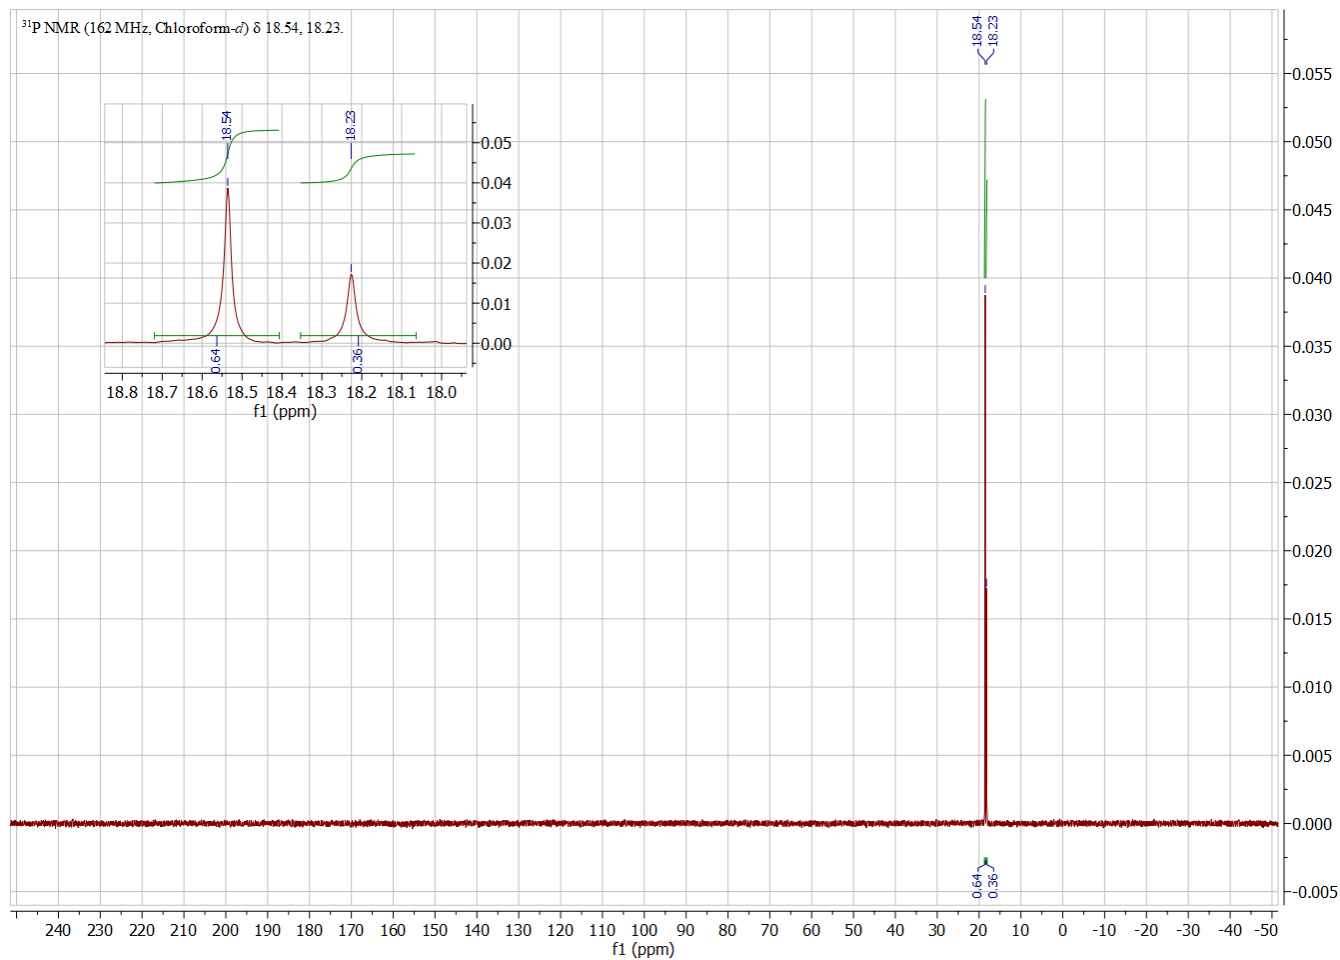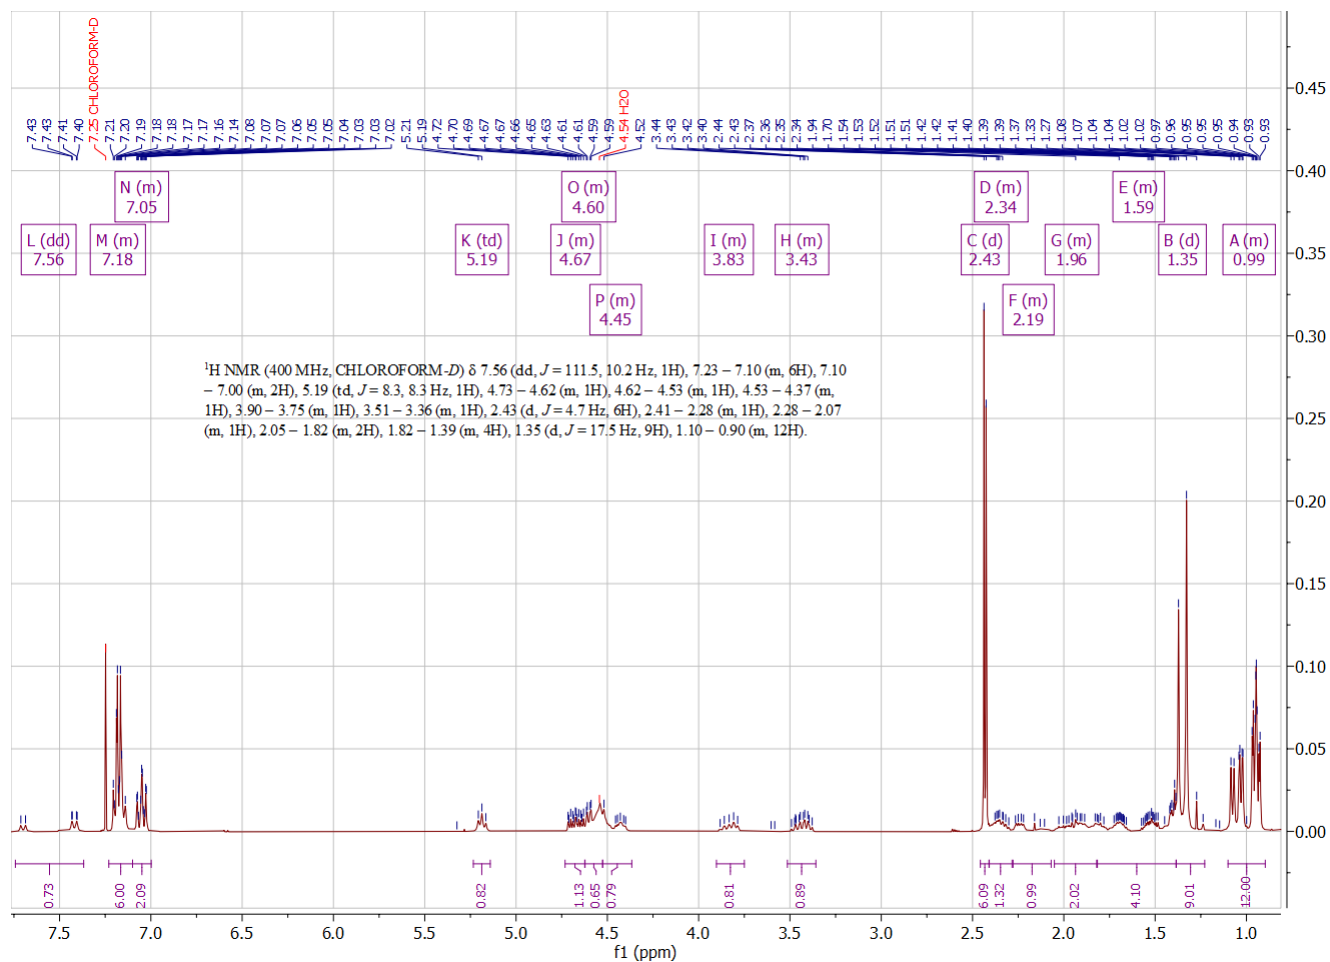

**(74) Boc-L-NptGly-L-Pro-Val<sup>P</sup>(OPh-4-SCH<sub>3</sub>)<sub>2</sub>**

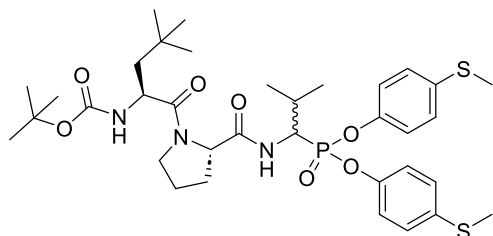

**Name:** *tert*-butyl ((2*S*)-1-((2*S*)-2-((1-(bis(4-(methylthio)phenoxy)phosphoryl)-2-methylpropyl)carbamoyl)pyrrolidin-1-yl)-4,4-dimethyl-1-oxopentan-2-yl)carbamate

<sup>31</sup>P NMR (162 MHz, Chloroform-*d*) δ 18.56 (s, 55%), 18.00 (s, 45%).

<sup>1</sup>H NMR (400 MHz, Chloroform-*d*) δ 7.41 (dd, *J* = 60.7, 10.2 Hz, 1H, NH), 7.23 – 7.15 (m, 4H, 4xArH), 7.15 – 7.09 (m, 2H, 2xArH), 7.09 – 6.99 (m, 2H, 2xArH), 5.18 (dd, *J* = 52.7, 9.1 Hz, 1H, NH), 4.76 – 4.62 (m, 2H, CHP, CH), 4.58 – 4.41 (m, 1H, CH), 3.78 – 3.67 (m, 1H, 0.5xCH<sub>2</sub>), 3.58 – 3.42 (m, 1H, 0.5xCH<sub>2</sub>), 2.43 (d, *J* = 3.7 Hz, 6H, 2xSCH<sub>3</sub>), 2.42 – 2.30 (m, 2H, 0.5xCH<sub>2</sub>, CH), 2.21 – 1.80 (m, 3H, 1.5xCH<sub>2</sub>), 1.40 (s, 9H, Boc), 1.35 – 1.22 (m, 2H, CH<sub>2</sub>), 1.11 – 0.98 (m, 6H, 2xCH<sub>3</sub>), 0.89 (d, *J* = 65.0 Hz, 9H, 3xCH<sub>3</sub>)

**HRMS:** C<sub>35</sub>H<sub>52</sub>N<sub>3</sub>O<sub>7</sub>PS<sub>2</sub> [M+Na]<sup>+</sup> calc. 744.2882 found 744.2855

**HPLC:** purity >99%; retention time 20.033 and 20.220 min

**Chromatogram**

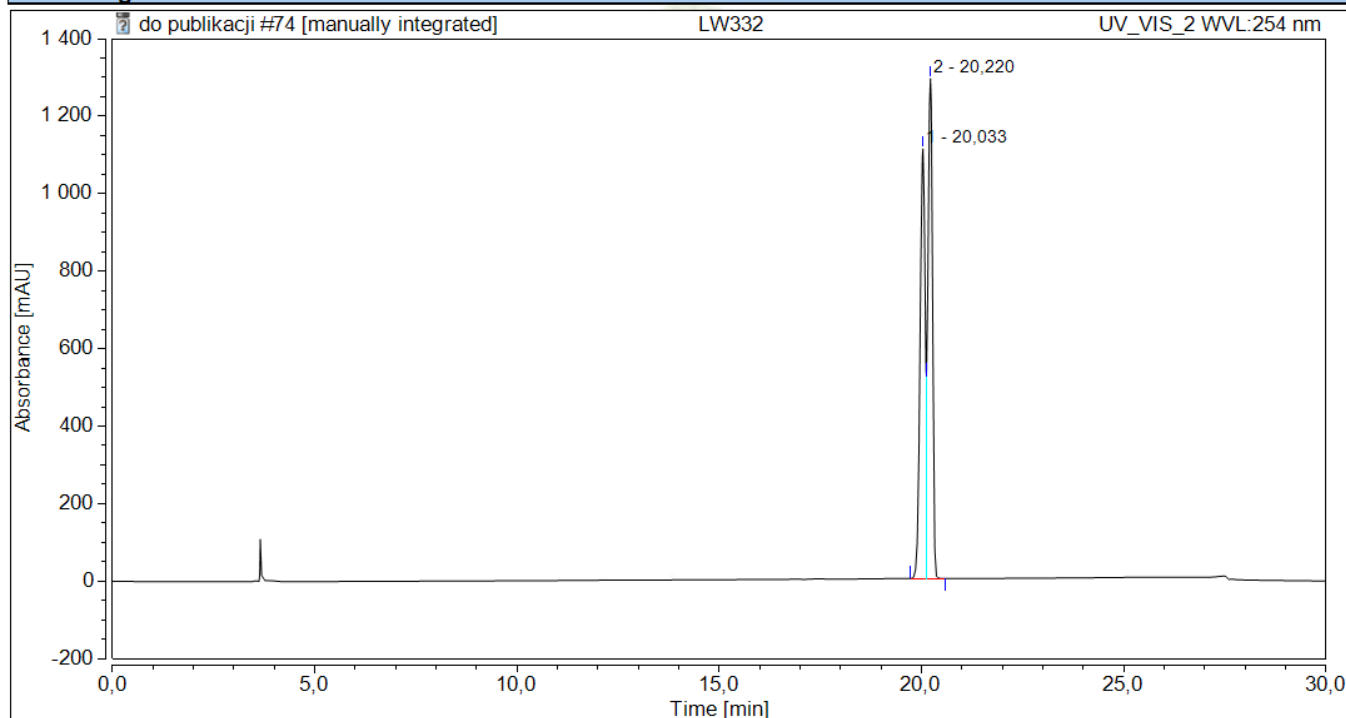

**Integration Results**

| No.           | Peak Name | Retention Time<br>min | Area<br>mAU*min | Height<br>mAU   | Relative Area<br>% | Relative Height<br>% | Amount<br>n.a. |
|---------------|-----------|-----------------------|-----------------|-----------------|--------------------|----------------------|----------------|
| 1             |           | 20,033                | 160,914         | 1108,590        | 48,31              | 46,22                | n.a.           |
| 2             |           | 20,220                | 172,163         | 1290,159        | 51,69              | 53,78                | n.a.           |
| <b>Total:</b> |           |                       | <b>333,077</b>  | <b>2398,750</b> | <b>100,00</b>      | <b>100,00</b>        |                |

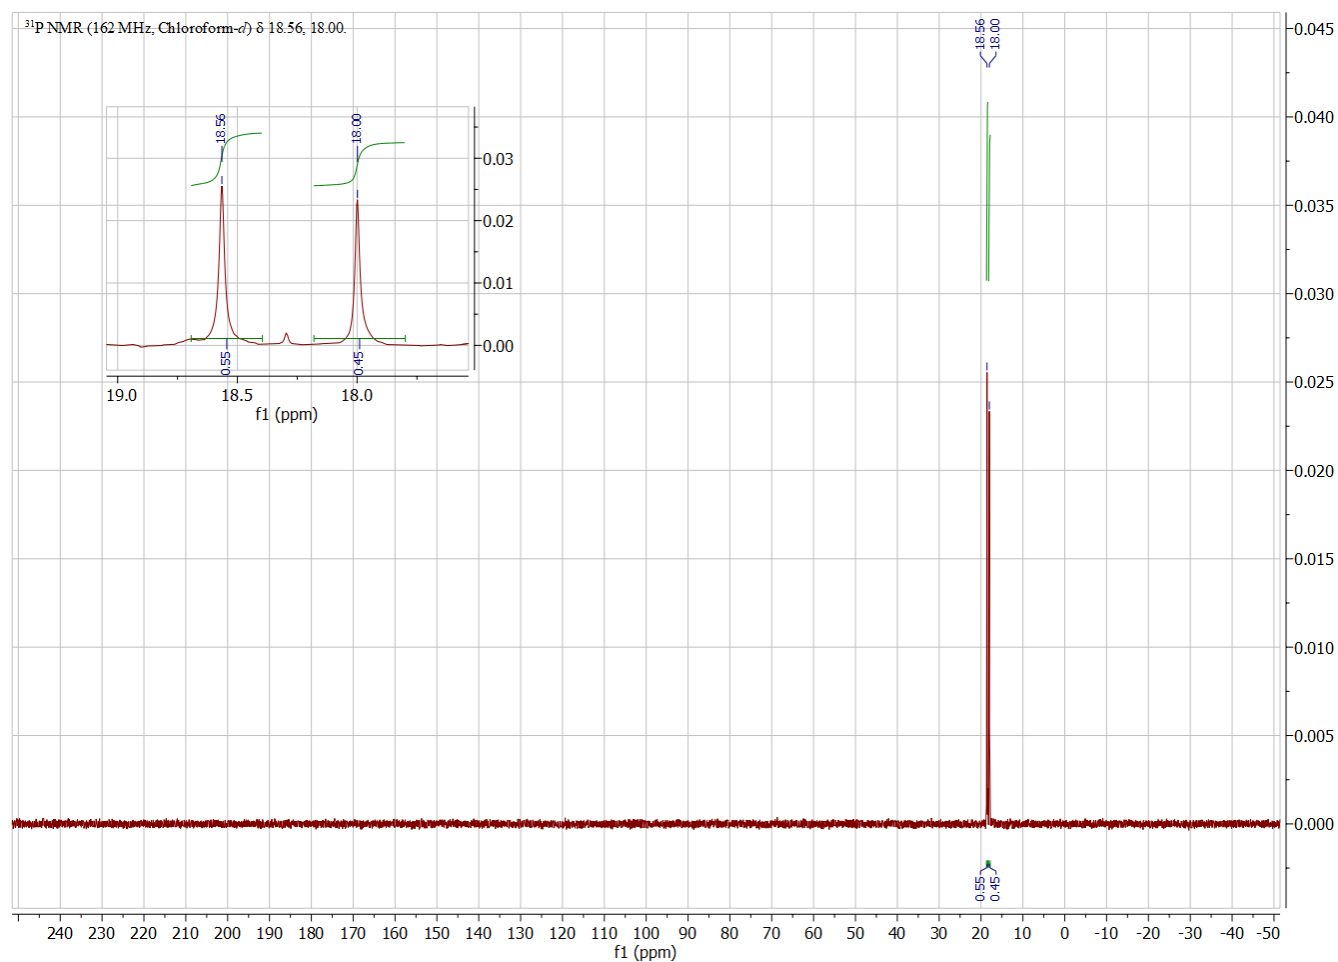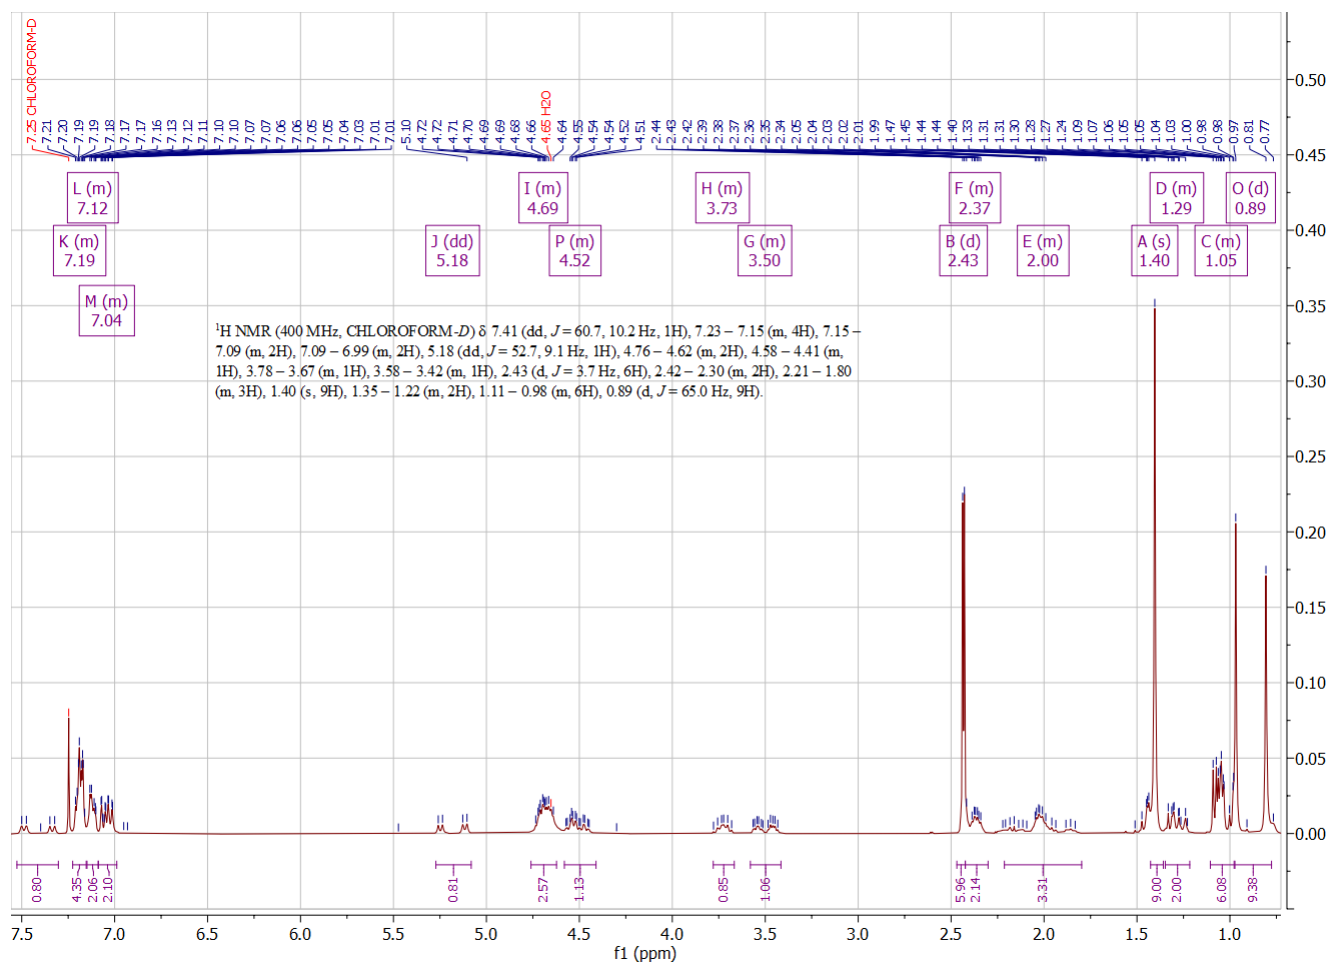

**(75) Boc-L-Met-L-Pro- Val<sup>P</sup>(OPh-4-SCH<sub>3</sub>)<sub>2</sub>**

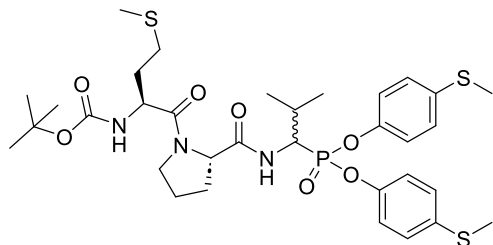

**Name:** *tert*-butyl ((2*S*)-1-((2*S*)-2-((1-(bis(4-(methylthio)phenoxy)phosphoryl)-2-methylpropyl)carbamoyl)pyrrolidin-1-yl)-4-(methylthio)-1-oxobutan-2-yl)carbamate

<sup>31</sup>P NMR (162 MHz, Chloroform-*d*) δ 18.46 (s, 53%), 17.96 (s, 47%).

<sup>1</sup>H NMR (400 MHz, Chloroform-*d*) δ 7.33 (dd, *J* = 90.0, 10.0 Hz, 1H, NH), 7.21 – 7.00 (m, 8H, 8xArH), 5.33 (dd, *J* = 45.1, 8.8 Hz, 1H, NH), 4.77 – 4.45 (m, 3H, CHP, 2xCH), 3.81 – 3.51 (m, 2H, CH<sub>2</sub>), 2.62 – 2.49 (m, 1H, CH), 2.46 – 2.43 (m, 6H, 2xSCH<sub>3</sub>), 2.43 – 2.29 (m, 2H, CH<sub>2</sub>), 2.19 – 1.62 (m, 8H, CH<sub>3</sub>, 2.5xCH<sub>2</sub>), 1.50 – 1.31 (m, 9H, Boc), 1.31 – 1.22 (m, 1H, 0.5xCH<sub>2</sub>), 1.11 – 0.96 (m, 6H, 2xCH<sub>3</sub>).

**HRMS:** C<sub>33</sub>H<sub>48</sub>N<sub>3</sub>O<sub>7</sub>PS<sub>3</sub> [M+Na]<sup>+</sup> calc. 748.2290 found 748.2264

**HPLC:** purity >99%; retention time 18.557 and 18.837 min

**Chromatogram**

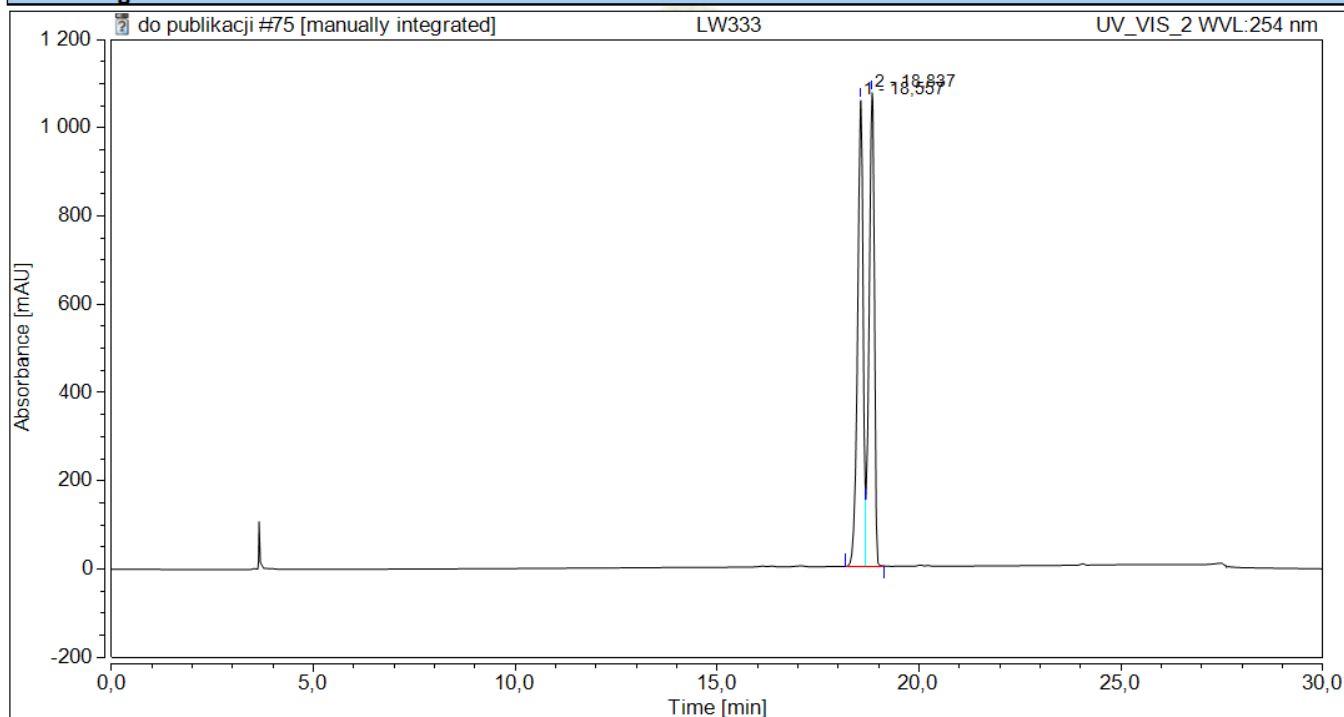

**Integration Results**

| No.           | Peak Name | Retention Time<br>min | Area<br>mAU*min | Height<br>mAU   | Relative Area<br>% | Relative Height<br>% | Amount<br>n.a. |
|---------------|-----------|-----------------------|-----------------|-----------------|--------------------|----------------------|----------------|
| 1             |           | 18,557                | 167,954         | 1055,893        | 50,88              | 49,59                | n.a.           |
| 2             |           | 18,837                | 162,154         | 1073,161        | 49,12              | 50,41                | n.a.           |
| <b>Total:</b> |           |                       | <b>330,108</b>  | <b>2129,054</b> | <b>100,00</b>      | <b>100,00</b>        |                |



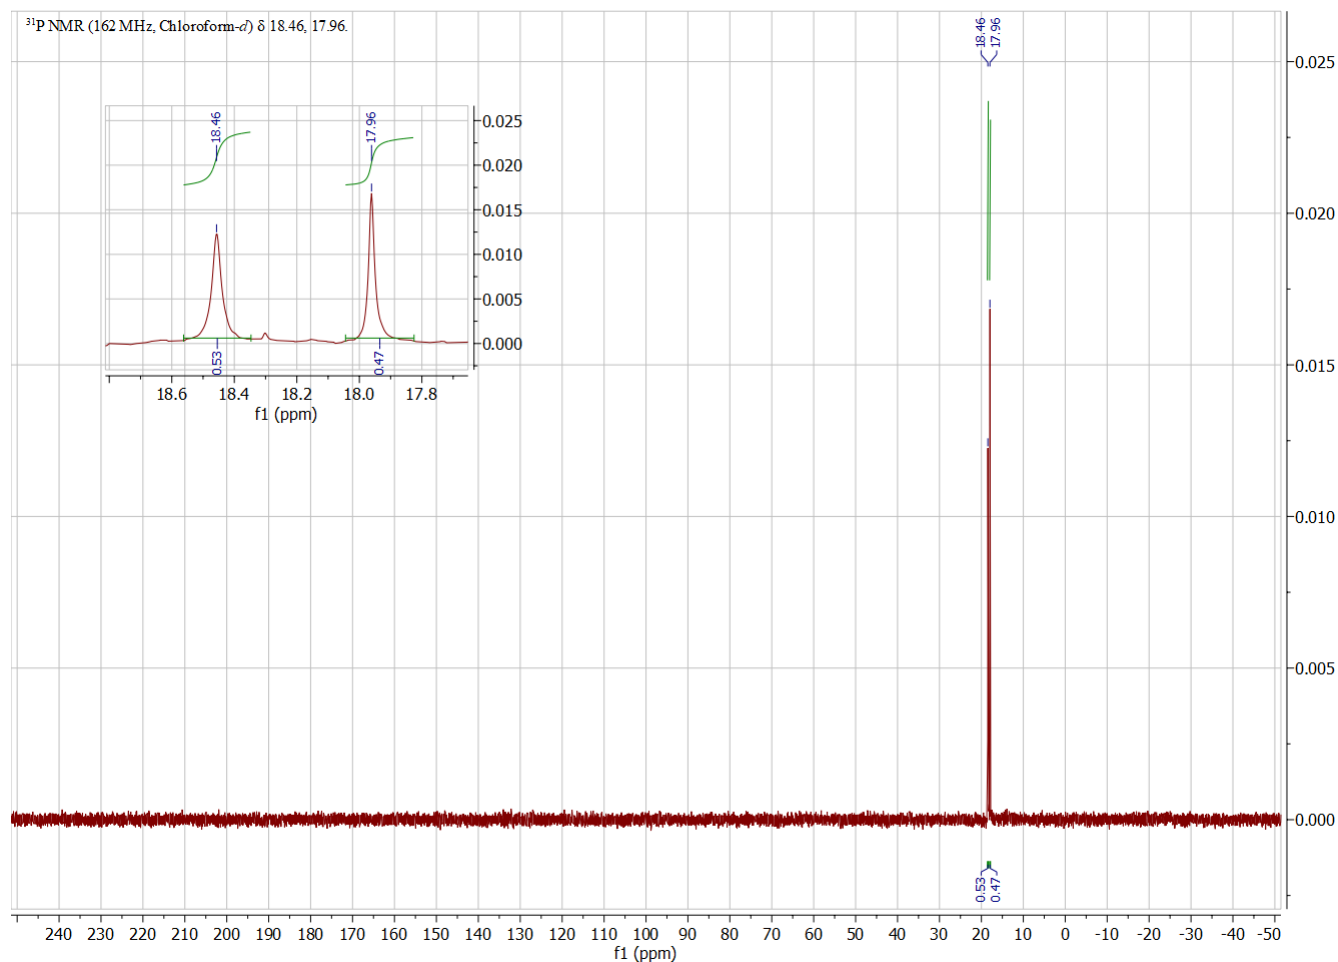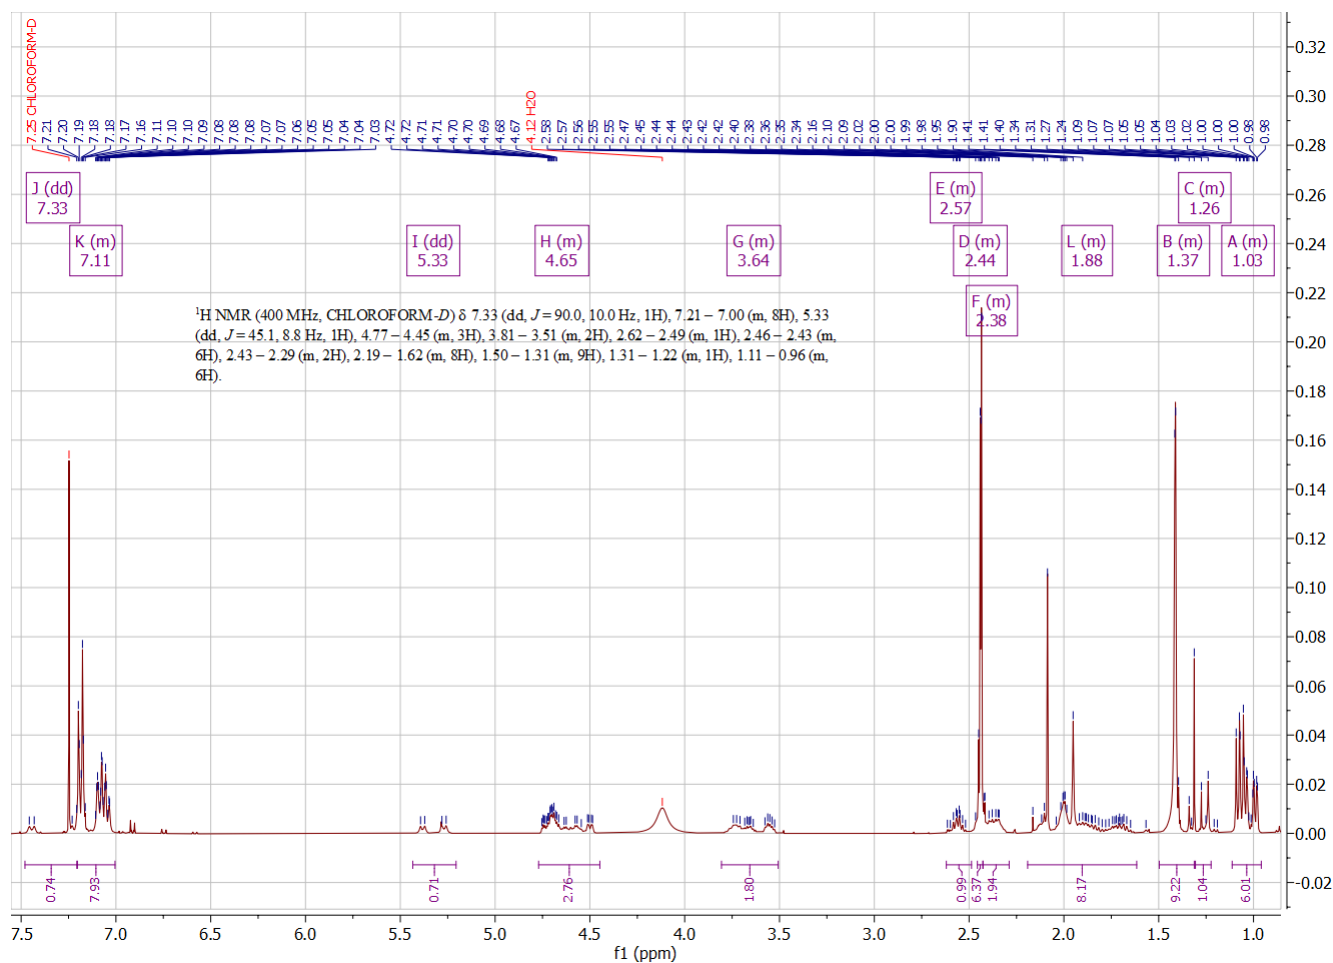

**(76) Boc-D-Met-L-Pro-Val<sup>P</sup>(OPh-4-SCH<sub>3</sub>)<sub>2</sub>**

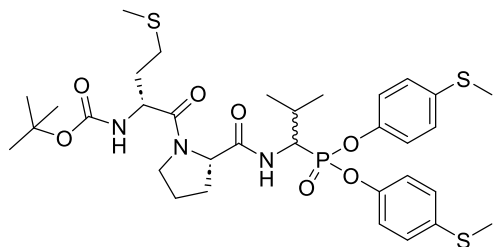

**Name:** *tert*-butyl ((2*R*)-1-((2*S*)-2-((1-(bis(4-(methylthio)phenoxy)phosphoryl)-2-methylpropyl)carbamoyl)pyrrolidin-1-yl)-4-(methylthio)-1-oxobutan-2-yl)carbamate

<sup>31</sup>P NMR (162 MHz, Chloroform-*d*) δ 18.46 (s, 59%), 18.15 (s, 41%).

<sup>1</sup>H NMR (400 MHz, Chloroform-*d*) δ 7.53 (dd, *J* = 39.7, 10.0 Hz, 1H, NH), 7.22 – 7.10 (m, 6H, 6xArH), 7.10 – 7.00 (m, 2H, 2xArH), 5.35 (dd, *J* = 30.3, 8.5 Hz, 1H, NH), 4.73 – 4.59 (m, 2H, CHP, CH), 4.59 – 4.49 (m, 1H, CH), 3.89 – 3.68 (m, 1H, 0.5xCH<sub>2</sub>), 3.66 – 3.46 (m, 1H, 0.5xCH<sub>2</sub>), 2.59 – 2.50 (m, 2H, CH<sub>2</sub>), 2.43 (d, *J* = 3.7 Hz, 6H, 2xSCH<sub>3</sub>), 2.41 – 2.21 (m, 2H, 0.5xCH<sub>2</sub>, CH), 2.09 (d, *J* = 3.1 Hz, 3H, CH<sub>3</sub>), 2.04 – 1.77 (m, 5H, 2.5xCH<sub>2</sub>), 1.36 (d, *J* = 19.1 Hz, 9H, Boc), 1.10 – 0.94 (m, 6H, 2xCH<sub>3</sub>).

**HRMS:** C<sub>33</sub>H<sub>48</sub>N<sub>3</sub>O<sub>7</sub>PS<sub>3</sub> [M+Na]<sup>+</sup> calc. 748.2290 found 748.2278

**HPLC:** purity >99%; retention time 18.687 min

**Chromatogram**

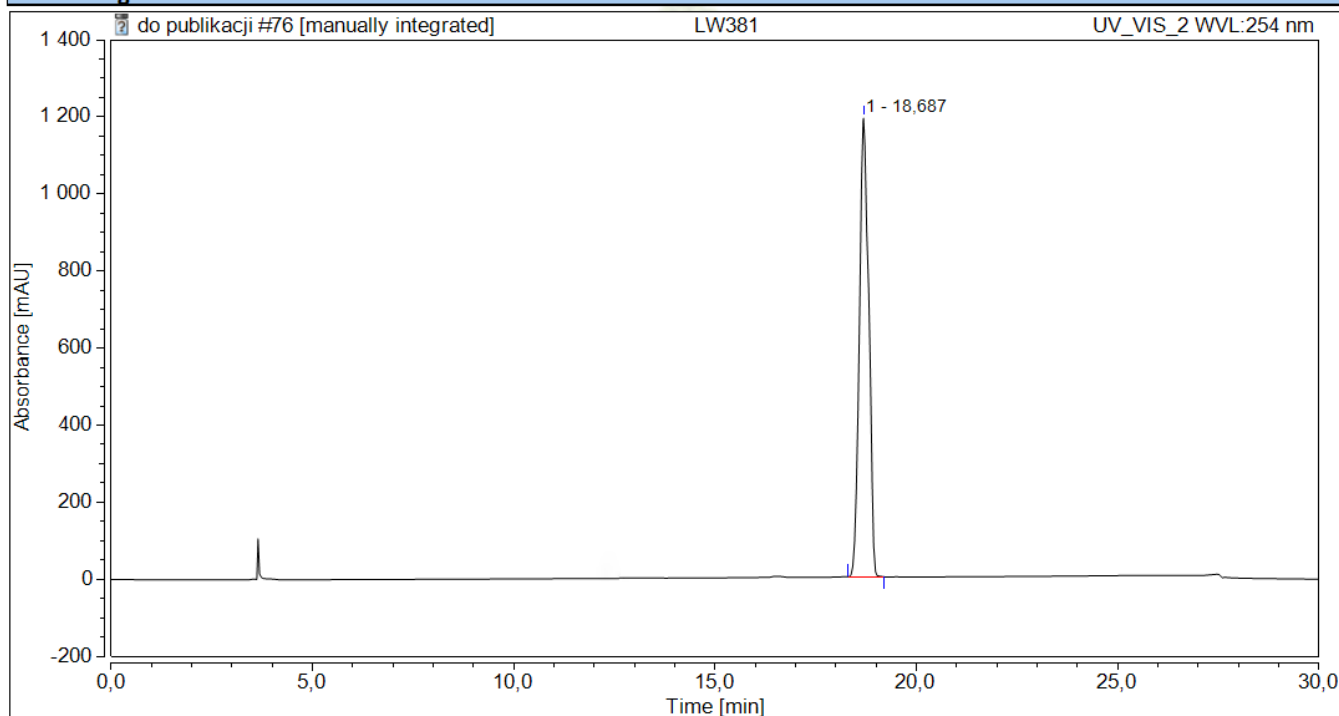

**Integration Results**

| No.           | Peak Name | Retention Time<br>min | Area<br>mAU*min | Height<br>mAU   | Relative Area<br>% | Relative Height<br>% | Amount<br>n.a. |
|---------------|-----------|-----------------------|-----------------|-----------------|--------------------|----------------------|----------------|
| 1             |           | 18,687                | 319,783         | 1190,076        | 100,00             | 100,00               | n.a.           |
| <b>Total:</b> |           |                       | <b>319,783</b>  | <b>1190,076</b> | <b>100,00</b>      | <b>100,00</b>        |                |

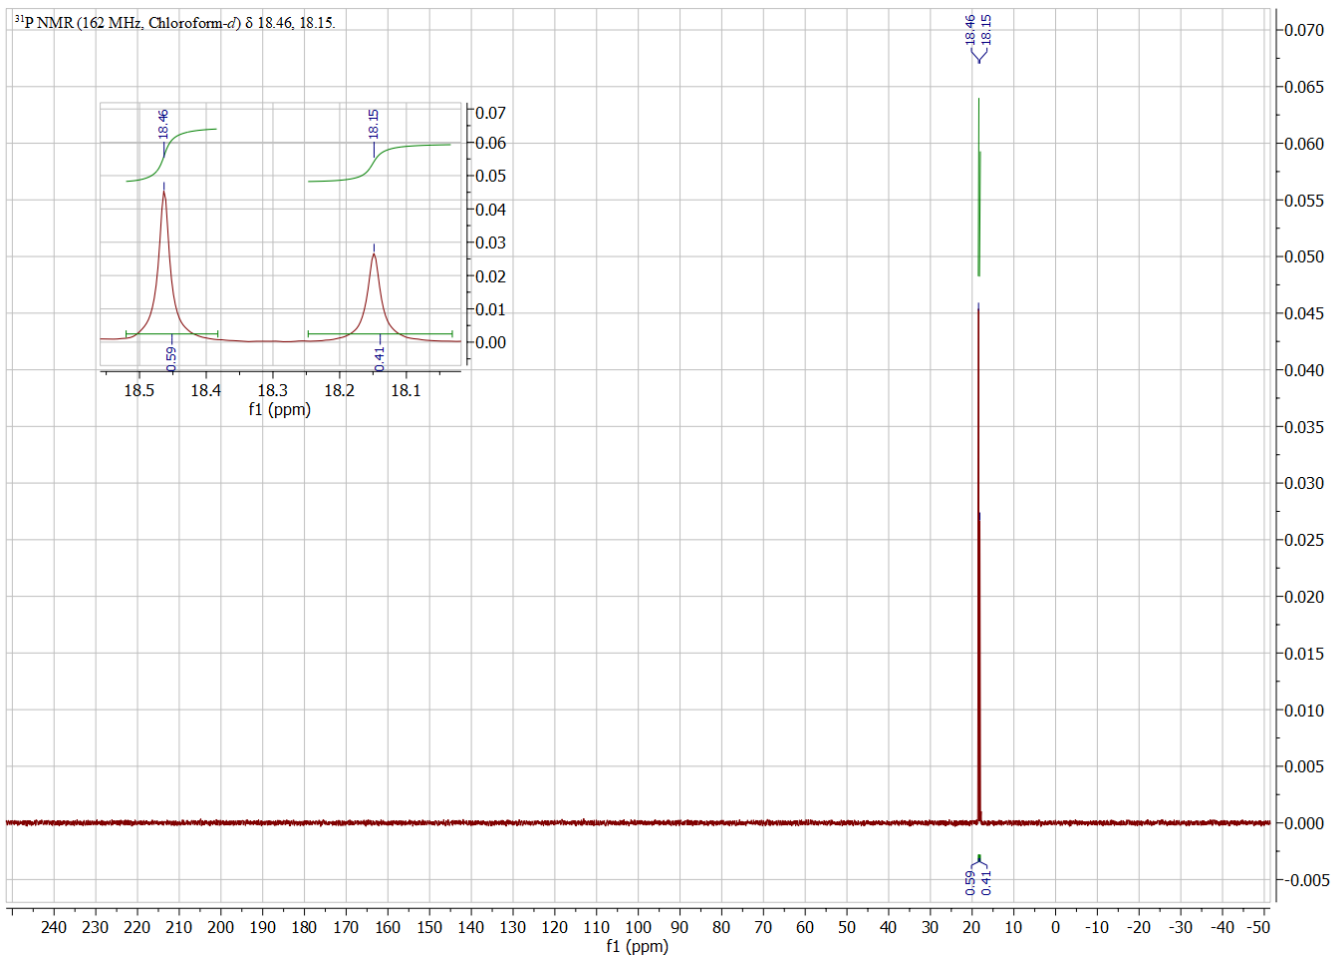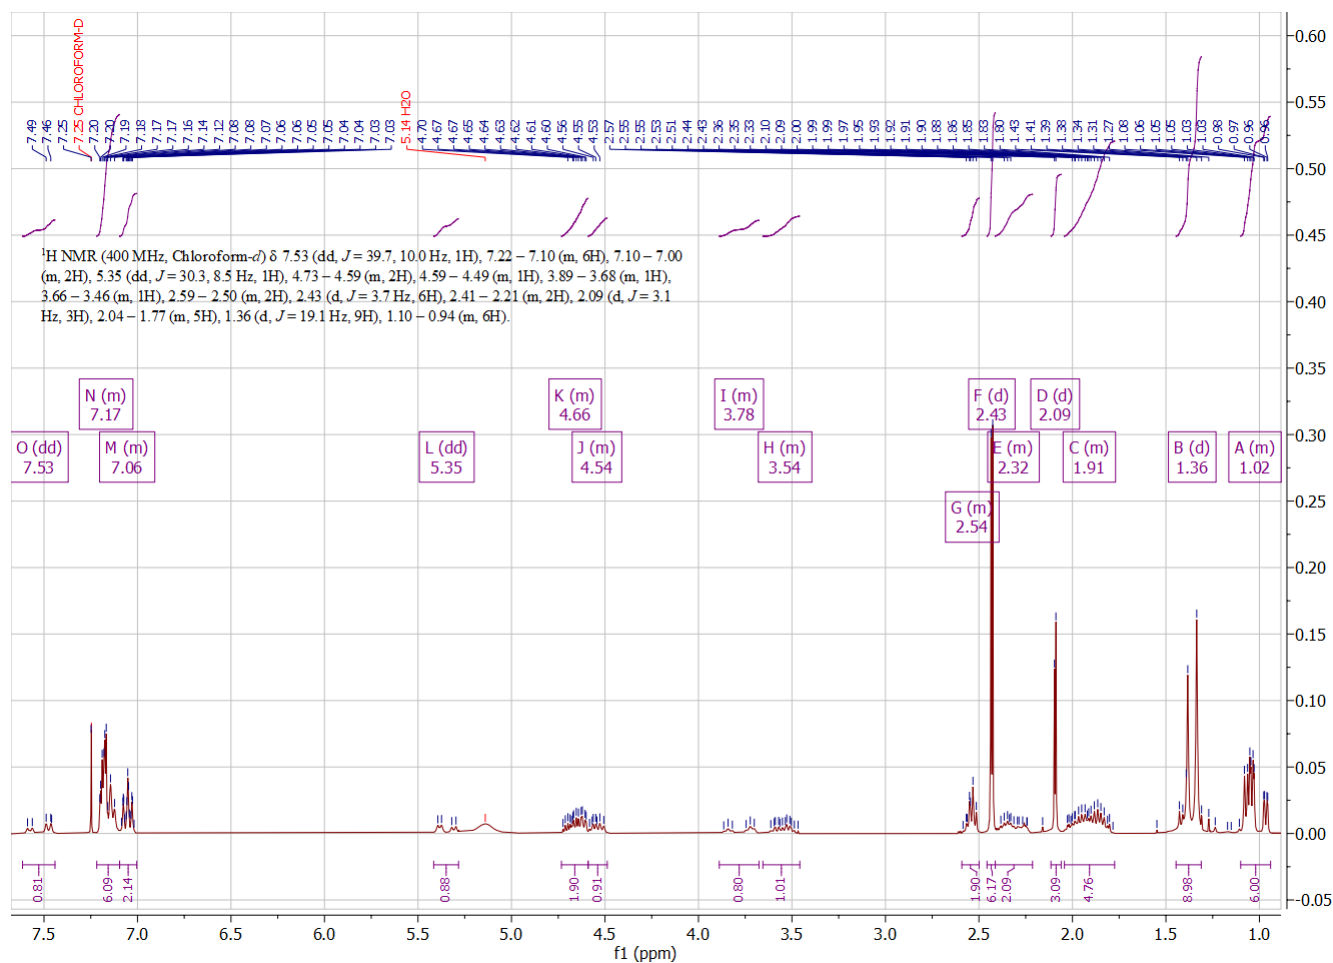

**(77) Boc-L-Met(O)-L-Pro-Val<sup>P</sup>(OPh-4-SCH<sub>3</sub>)<sub>2</sub>**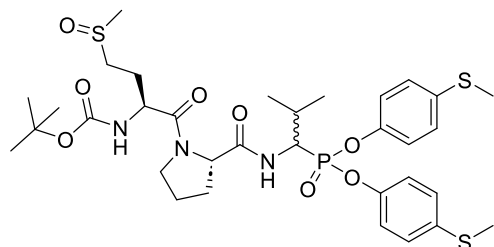

**Name:** *tert*-butyl ((2*S*)-1-((2*S*)-2-((1-(bis(4-(methylthio)phenoxy)phosphoryl)-2-methylpropyl)carbamoyl)pyrrolidin-1-yl)-4-(methylsulfinyl)-1-oxobutan-2-yl)carbamate

<sup>31</sup>P NMR (162 MHz, Chloroform-*d*) δ 18.37 (s, 27%), 18.16 (s, 19%), 17.94 (d, *J* = 2.2 Hz, 52%).

<sup>1</sup>H NMR (400 MHz, Chloroform-*d*) δ 7.51 (dd, *J* = 33.7, 10.3 Hz, 1H, NH), 7.22 – 7.14 (m, 4H, 4xArH), 7.12 – 6.96 (m, 4H, 4xArH), 5.58 – 5.35 (m, 1H, NH), 4.77 – 4.44 (m, 3H, CHP, 2xCH), 3.77 – 3.38 (m, 2H, CH<sub>2</sub>), 2.93 – 2.68 (m, 2H, CH<sub>2</sub>), 2.69 – 2.51 (m, 3H, CH<sub>3</sub>), 2.44 (d, *J* = 2.5 Hz, 6H, 2xSCH<sub>3</sub>), 2.42 – 2.20 (m, 2H, 0.5xCH<sub>2</sub>, CH), 2.20 – 1.77 (m, 5H, 2.5xCH<sub>2</sub>), 1.41 (s, 9H, Boc), 1.13 – 0.98 (m, 6H, 2xCH<sub>3</sub>).

**HRMS:** C<sub>33</sub>H<sub>48</sub>N<sub>3</sub>O<sub>8</sub>PS<sub>3</sub> [M+Na]<sup>+</sup> calc. 764.2239 found 764.2211

**HPLC:** purity >99%; retention time 16.127 and 16.370 min

**Chromatogram**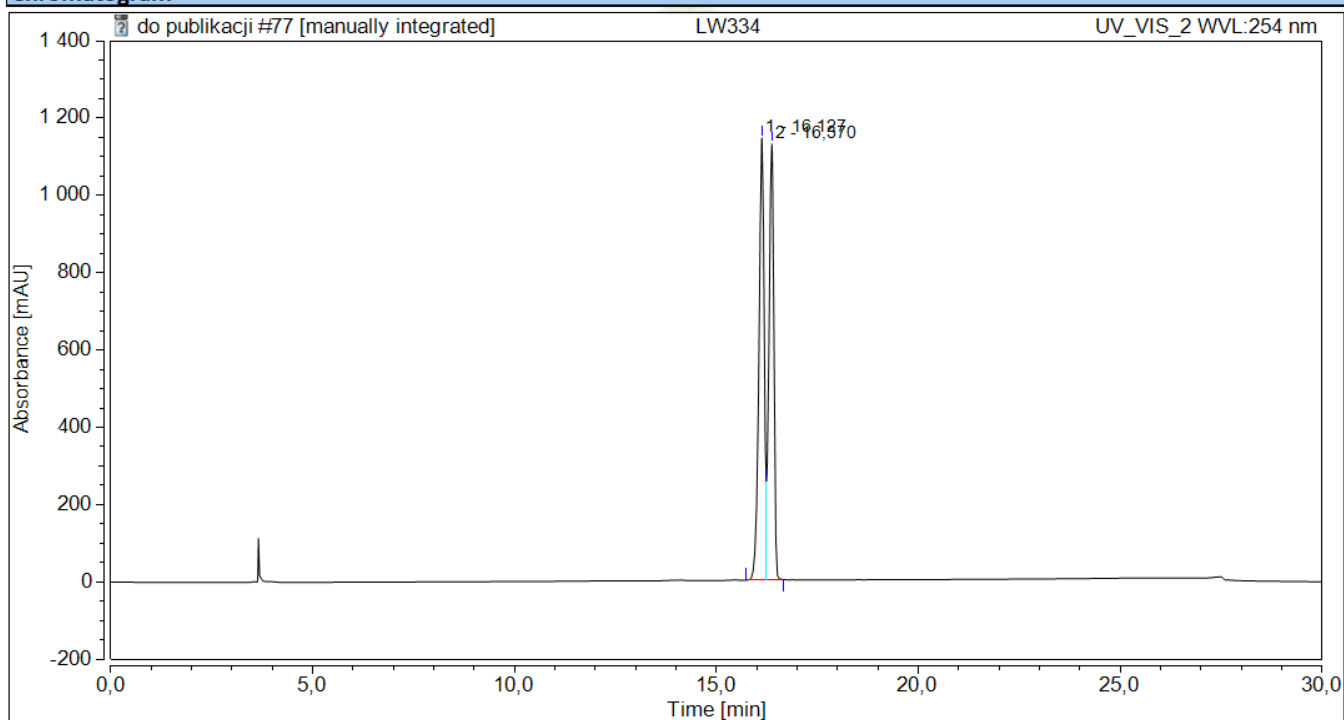**Integration Results**

| No.           | Peak Name | Retention Time<br>min | Area<br>mAU*min | Height<br>mAU   | Relative Area<br>% | Relative Height<br>% | Amount<br>n.a. |
|---------------|-----------|-----------------------|-----------------|-----------------|--------------------|----------------------|----------------|
| 1             |           | 16,127                | 173,711         | 1143,549        | 52,21              | 50,35                | n.a.           |
| 2             |           | 16,370                | 158,999         | 1127,545        | 47,79              | 49,65                | n.a.           |
| <b>Total:</b> |           |                       | <b>332,711</b>  | <b>2271,093</b> | <b>100,00</b>      | <b>100,00</b>        |                |

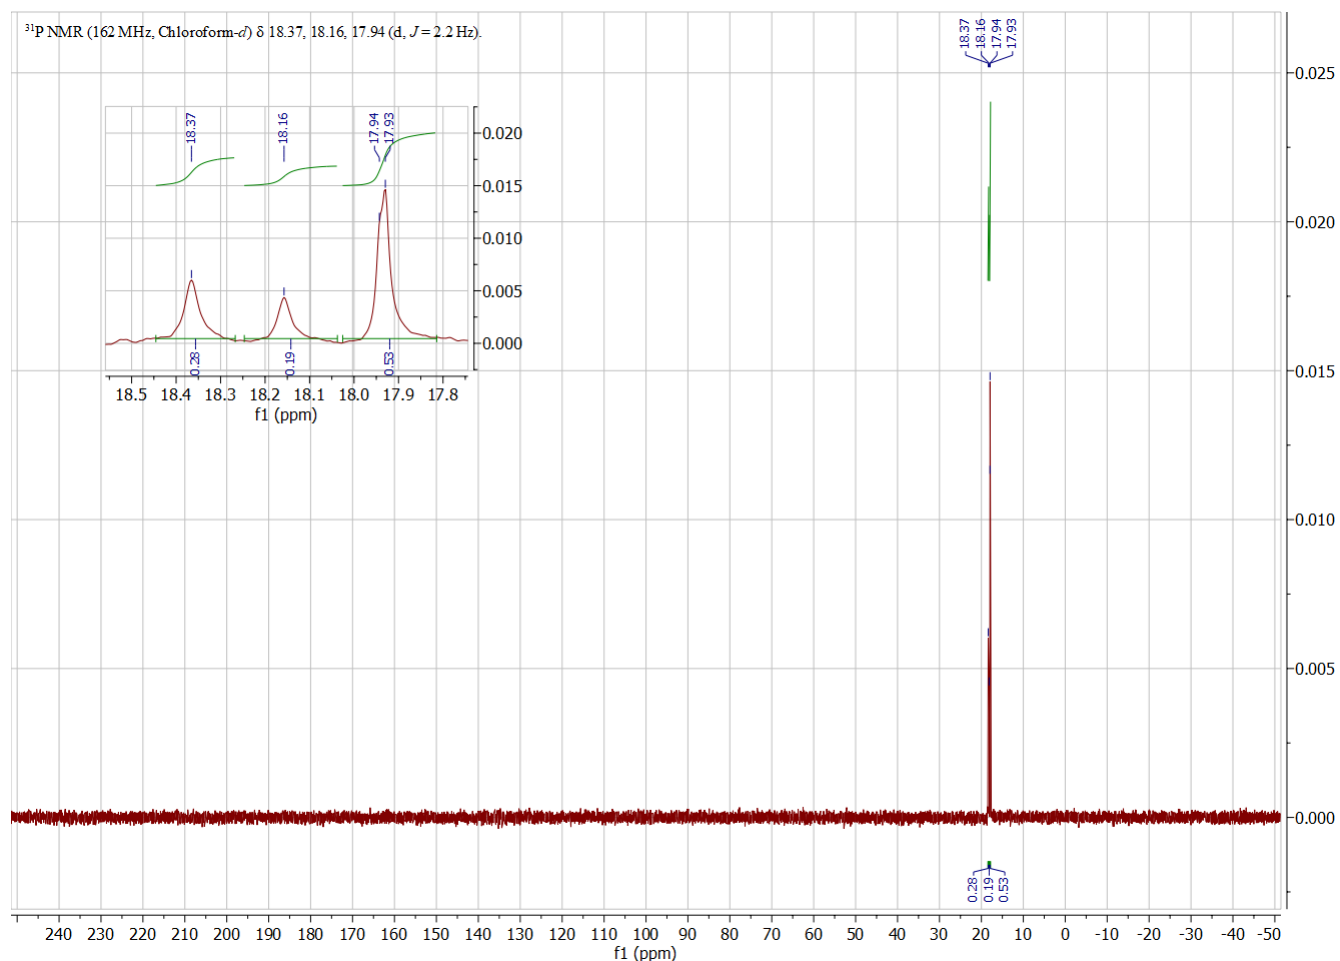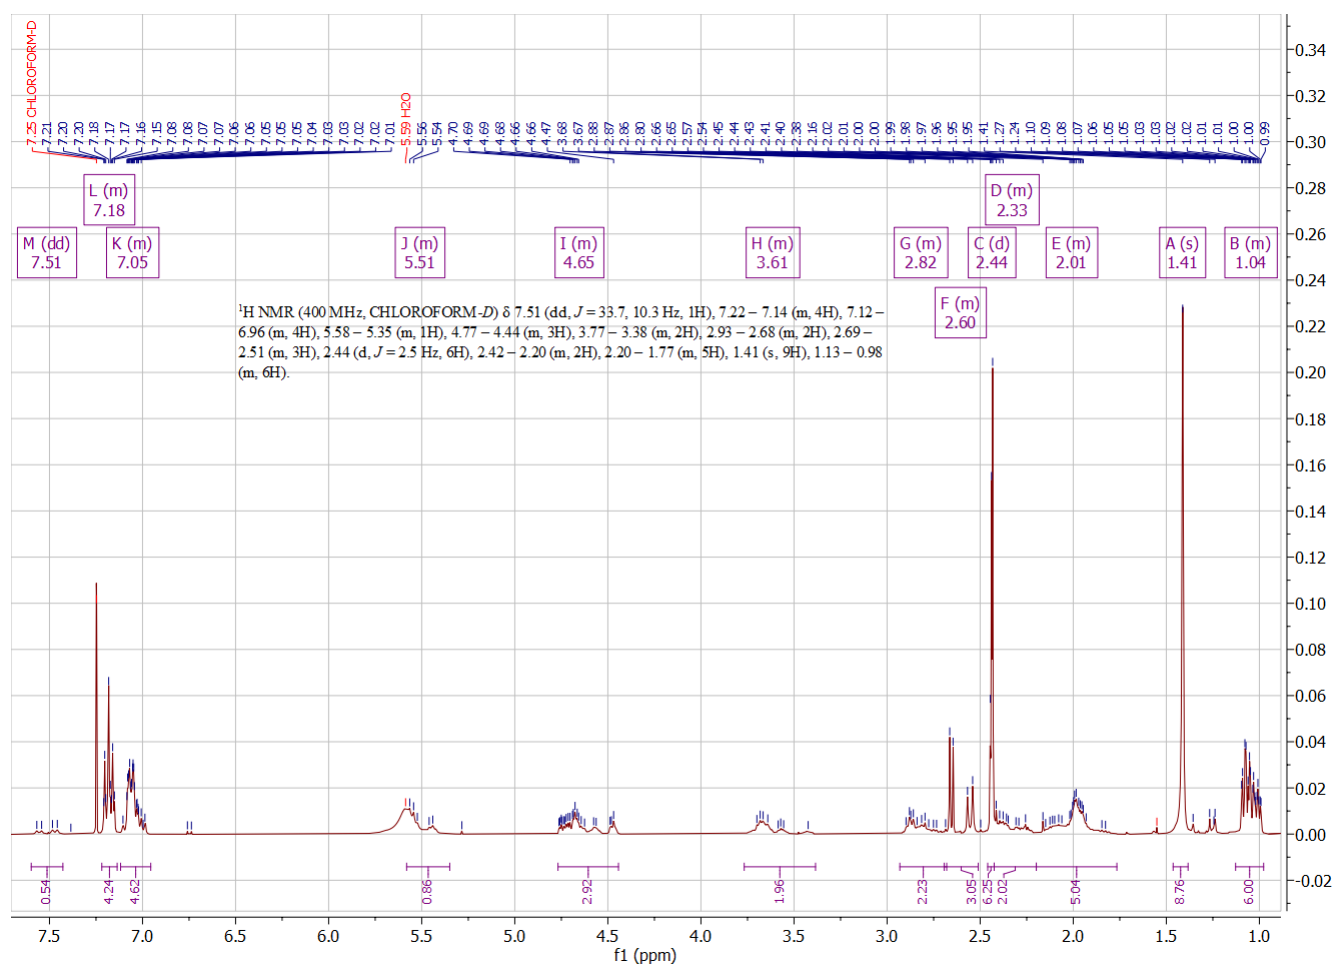

**(78) Boc-L-Met(O)<sub>2</sub>-L-Pro- Val<sup>P</sup>(OPh-4-SCH<sub>3</sub>)<sub>2</sub>**

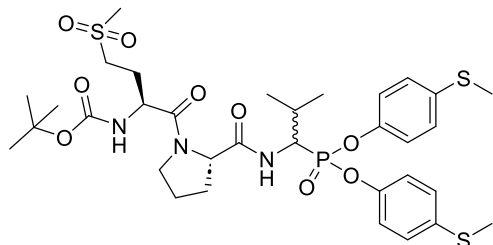

**Name:** *tert*-butyl ((2*S*)-1-((2*S*)-2-((1-(bis(4-(methylthio)phenoxy)phosphoryl)-2-methylpropyl)carbamoyl)pyrrolidin-1-yl)-4-(methylsulfonyl)-1-oxobutan-2-yl)carbamate

<sup>31</sup>P NMR (162 MHz, Chloroform-*d*) δ 18.19 (s, 42%), 17.79 (s, 58%).

<sup>1</sup>H NMR (400 MHz, Chloroform-*d*) δ 7.29 (dd, *J* = 142.1, 10.3 Hz, 1H, NH), 7.23 – 7.14 (m, 4H, 4xArH), 7.09 – 6.95 (m, 4H, 4xArH), 5.51 (dd, *J* = 25.8, 8.4 Hz, 1H, NH), 4.85 – 4.44 (m, 3H, CHP, 2xCH), 3.77 – 3.51 (m, 2H, CH<sub>2</sub>), 3.19 – 2.99 (m, 2H, CH<sub>2</sub>), 2.87 (d, *J* = 46.8 Hz, 3H, CH<sub>3</sub>), 2.47 – 2.42 (m, 6H, 2xSCH<sub>3</sub>), 2.43 – 2.11 (m, 3H, CH<sub>2</sub>, CH), 2.11 – 1.79 (m, 4H, 2xCH<sub>2</sub>), 1.41 (s, 9H, Boc), 1.11 – 0.98 (m, 6H, 2xCH<sub>3</sub>).

**HRMS:** C<sub>33</sub>H<sub>48</sub>N<sub>3</sub>O<sub>9</sub>PS<sub>3</sub> [M+H]<sup>+</sup> 758.2369 found 758.2386.

**HPLC:** purity >99%; retention time 16.750 and 17.007 min

**Chromatogram**

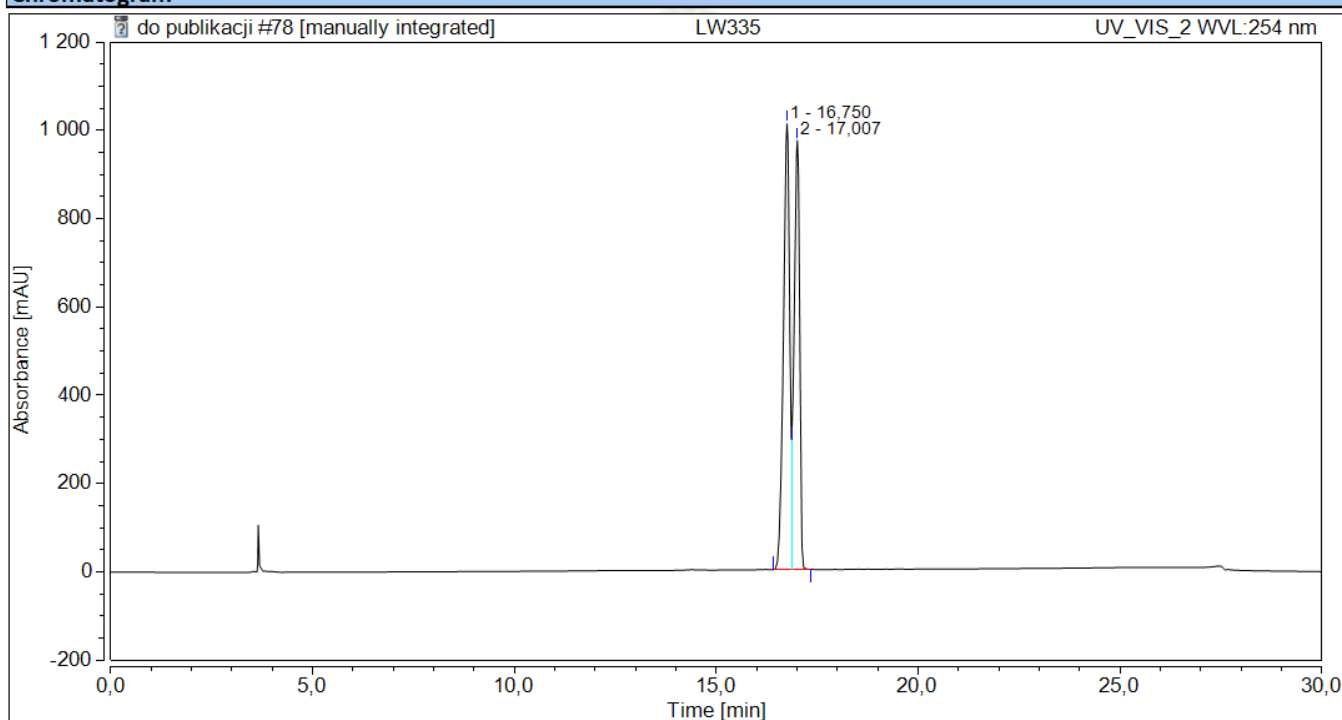

**Integration Results**

| No.           | Peak Name | Retention Time<br>min | Area<br>mAU*min | Height<br>mAU   | Relative Area<br>% | Relative Height<br>% | Amount |
|---------------|-----------|-----------------------|-----------------|-----------------|--------------------|----------------------|--------|
| 1             |           | 16,750                | 177,842         | 1009,523        | 53,38              | 50,95                | n.a.   |
| 2             |           | 17,007                | 155,310         | 971,858         | 46,62              | 49,05                | n.a.   |
| <b>Total:</b> |           |                       | <b>333,152</b>  | <b>1981,381</b> | <b>100,00</b>      | <b>100,00</b>        |        |

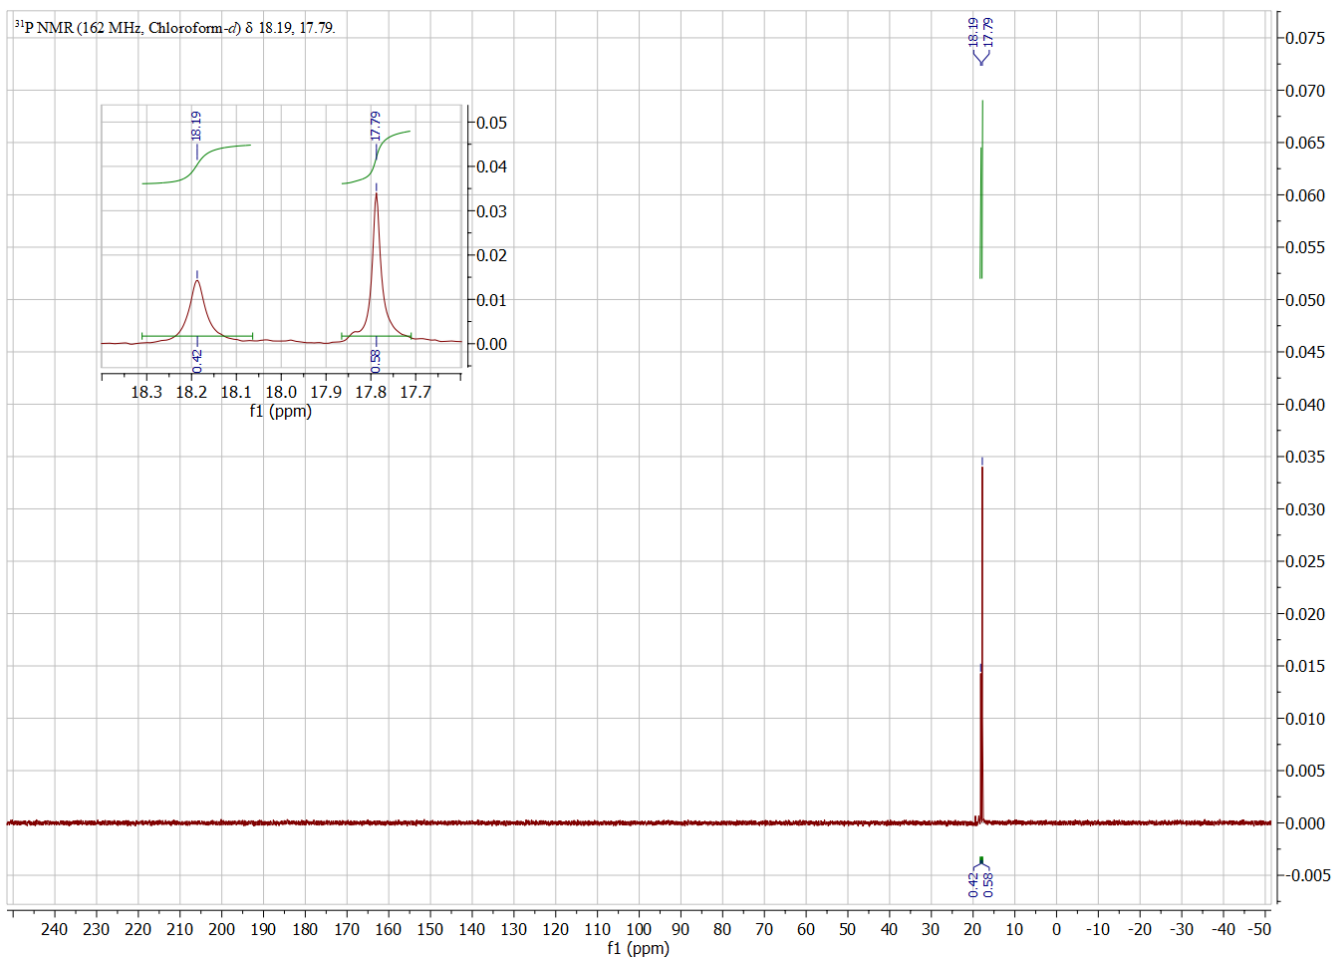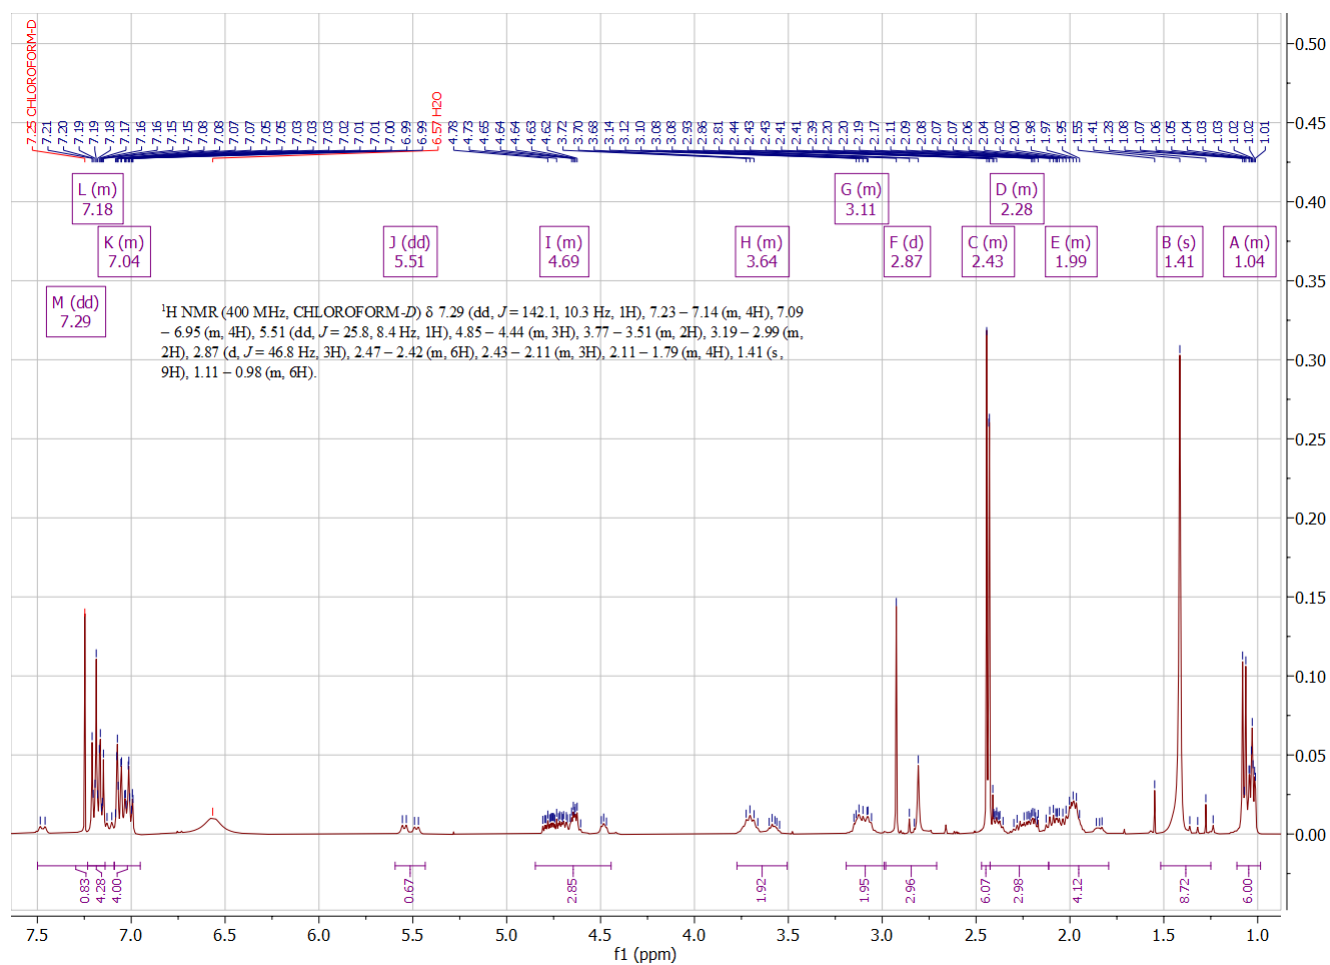

**(79) Boc-L-Gln-L-Pro-Val<sup>P</sup>(OPh-4-SCH<sub>3</sub>)<sub>2</sub>**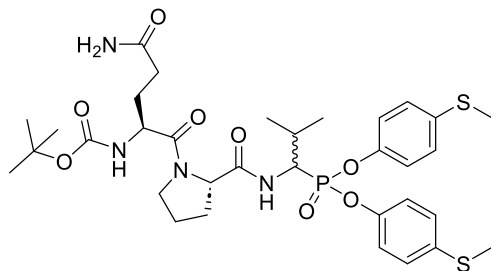

**Name:** *tert*-butyl ((2*S*)-5-amino-1-((2*S*)-2-((1-(bis(4-(methylthio)phenoxy)phosphoryl)-2-methylpropyl)carbamoyl)pyrrolidin-1-yl)-1,5-dioxopentan-2-yl)carbamate

**<sup>31</sup>P NMR** (162 MHz, Chloroform-*d*) δ 18.15 (s, 56%), 18.00 (s, 44%).

**<sup>1</sup>H NMR** (400 MHz, Chloroform-*d*) δ 7.52 (dd, *J* = 171.2, 10.2 Hz, 1H, NH), 7.23 – 6.44 (m, 10H, 8xArH, NH<sub>2</sub>), 5.46 (dd, *J* = 66.2, 8.2 Hz, 1H, NH), 4.84 – 4.38 (m, 3H, CHP, 2xCH), 3.74 – 3.33 (m, 2H, CH<sub>2</sub>), 2.52 – 2.35 (m, 8H, 2xSCH<sub>3</sub>, CH<sub>2</sub>), 2.35 – 2.20 (m, 1H, CH), 2.15 – 1.82 (m, 6H, 3xCH<sub>2</sub>), 1.41 (d, *J* = 5.7 Hz, 9H, Boc), 1.15 – 0.99 (m, 6H, 2xCH<sub>3</sub>).

**HRMS:** C<sub>33</sub>H<sub>47</sub>N<sub>4</sub>O<sub>8</sub>PS<sub>2</sub> [M+Na]<sup>+</sup> calc. 745.2471 found 745.2467

**HPLC:** purity >98%; retention time 15.847 and 16.103 min

**Chromatogram**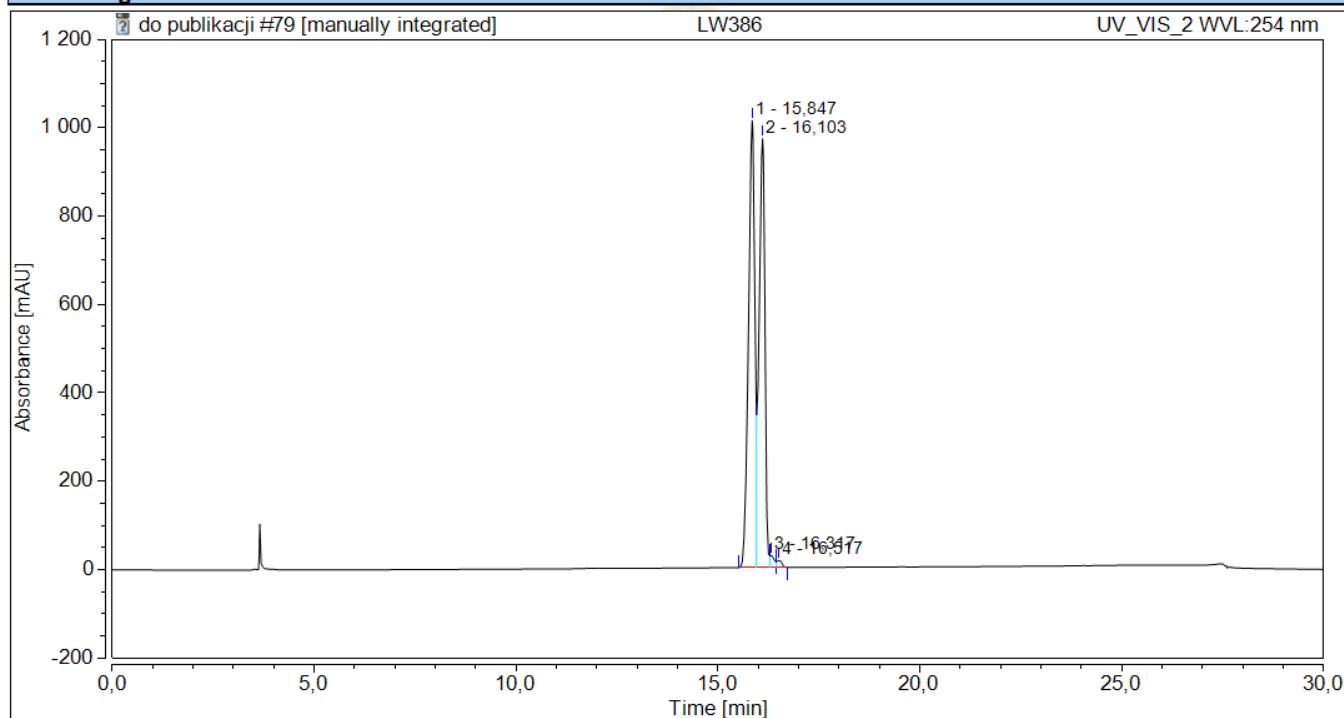**Integration Results**

| No.           | Peak Name | Retention Time<br>min | Area<br>mAU*min | Height<br>mAU   | Relative Area<br>% | Relative Height<br>% | Amount<br>n.a. |
|---------------|-----------|-----------------------|-----------------|-----------------|--------------------|----------------------|----------------|
| 1             |           | 15,847                | 182,632         | 1011,941        | 52,23              | 49,95                | n.a.           |
| 2             |           | 16,103                | 161,153         | 970,643         | 46,09              | 47,91                | n.a.           |
| 3             |           | 16,317                | 3,500           | 27,406          | 1,00               | 1,35                 | n.a.           |
| 4             |           | 16,517                | 2,360           | 16,113          | 0,67               | 0,80                 | n.a.           |
| <b>Total:</b> |           |                       | <b>349,645</b>  | <b>2026,103</b> | <b>100,00</b>      | <b>100,00</b>        |                |



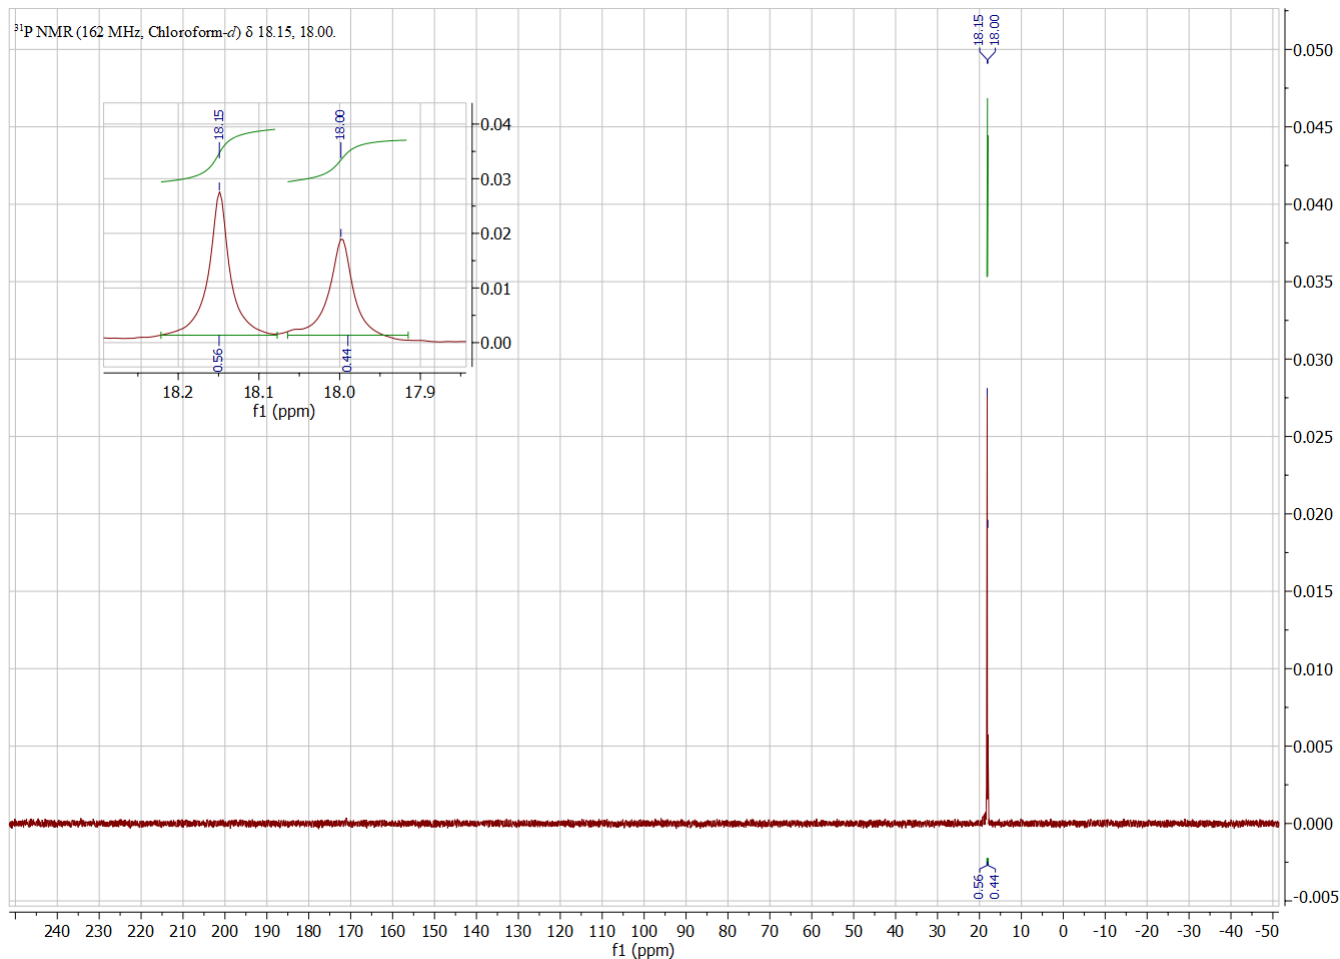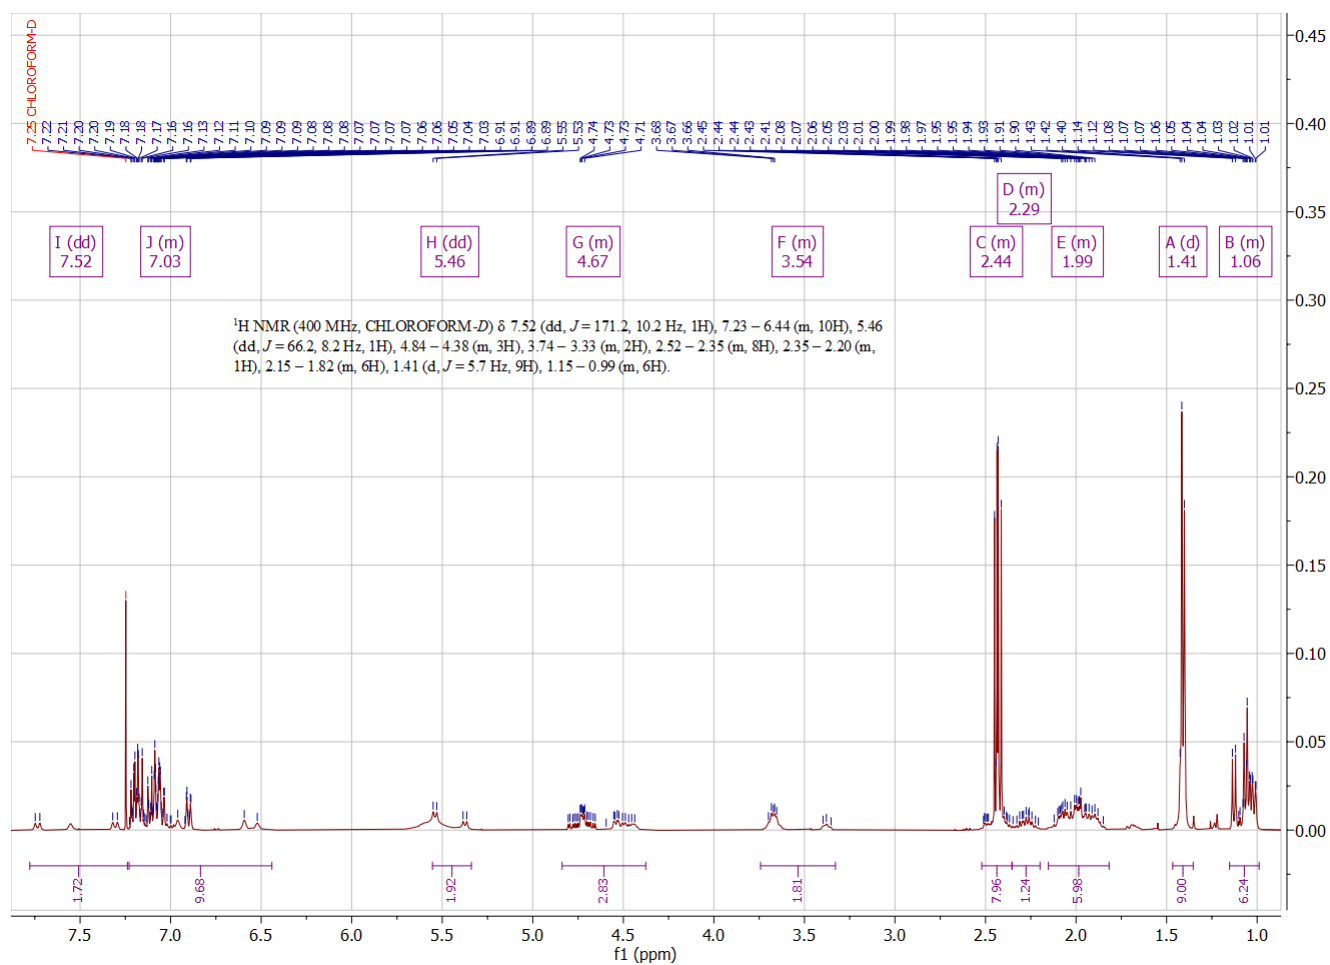

**(80) Boc-D-Gln-L-Pro- Val<sup>P</sup>(OPh-4-SCH<sub>3</sub>)<sub>2</sub>**

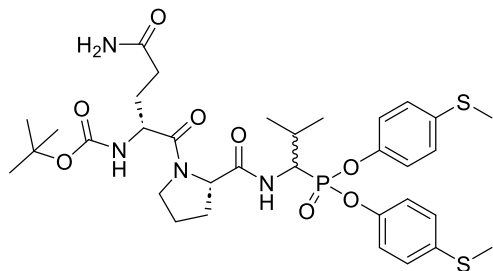

**Name:** *tert*-butyl ((2*R*)-5-amino-1-((2*S*)-2-((1-(bis(4-(methylthio)phenoxy)phosphoryl)-2-methylpropyl)carbamoyl)pyrrolidin-1-yl)-1,5-dioxopentan-2-yl)carbamate

**<sup>31</sup>P NMR** (162 MHz, Chloroform-*d*) δ 18.38 (s, 53%), 18.18 (s, 47%).

**<sup>1</sup>H NMR** (400 MHz, Chloroform-*d*) δ 7.46 (dd, *J* = 44.0, 10.3 Hz, 1H, NH), 7.22 – 7.04 (m, 9H, 8xArH, 0.5xNH<sub>2</sub>), 6.92 – 6.05 (m, 1H, 0.5xNH<sub>2</sub>), 5.64 (dd, *J* = 44.7, 8.2 Hz, 1H, NH), 4.73 – 4.35 (m, 3H, CHP, 2xCH), 3.74 – 3.38 (m, 2H, CH<sub>2</sub>), 2.44 – 2.43 (m, 6H, 2xSCH<sub>3</sub>), 2.41 – 2.29 (m, 3H, CH<sub>2</sub>, CH), 2.27 – 1.73 (m, 6H, 3xCH<sub>2</sub>), 1.38 (d, *J* = 15.4 Hz, 9H, Boc), 1.09 – 0.94 (m, 6H, 2xCH<sub>3</sub>).

**HRMS:** C<sub>33</sub>H<sub>47</sub>N<sub>4</sub>O<sub>8</sub>PS<sub>2</sub> [M+Na]<sup>+</sup> calc. 745.2471 found 745.2472

**HPLC:** purity >99%; retention time 16.110 and 16.280 min

**Chromatogram**

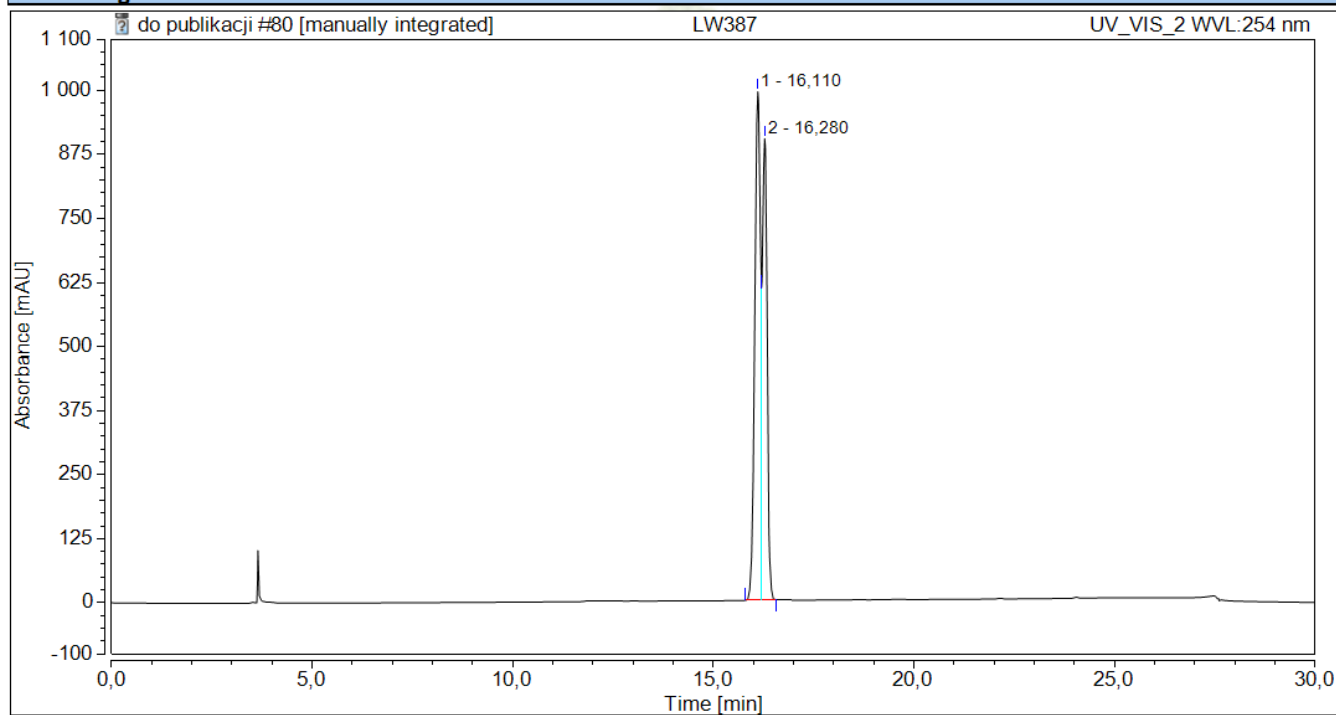

**Integration Results**

| No.           | Peak Name | Retention Time<br>min | Area<br>mAU*min | Height<br>mAU   | Relative Area<br>% | Relative Height<br>% | Amount<br>n.a. |
|---------------|-----------|-----------------------|-----------------|-----------------|--------------------|----------------------|----------------|
| 1             |           | 16,110                | 161,880         | 992,559         | 56,17              | 52,42                | n.a.           |
| 2             |           | 16,280                | 126,328         | 900,913         | 43,83              | 47,58                | n.a.           |
| <b>Total:</b> |           |                       | <b>288,209</b>  | <b>1893,473</b> | <b>100,00</b>      | <b>100,00</b>        |                |

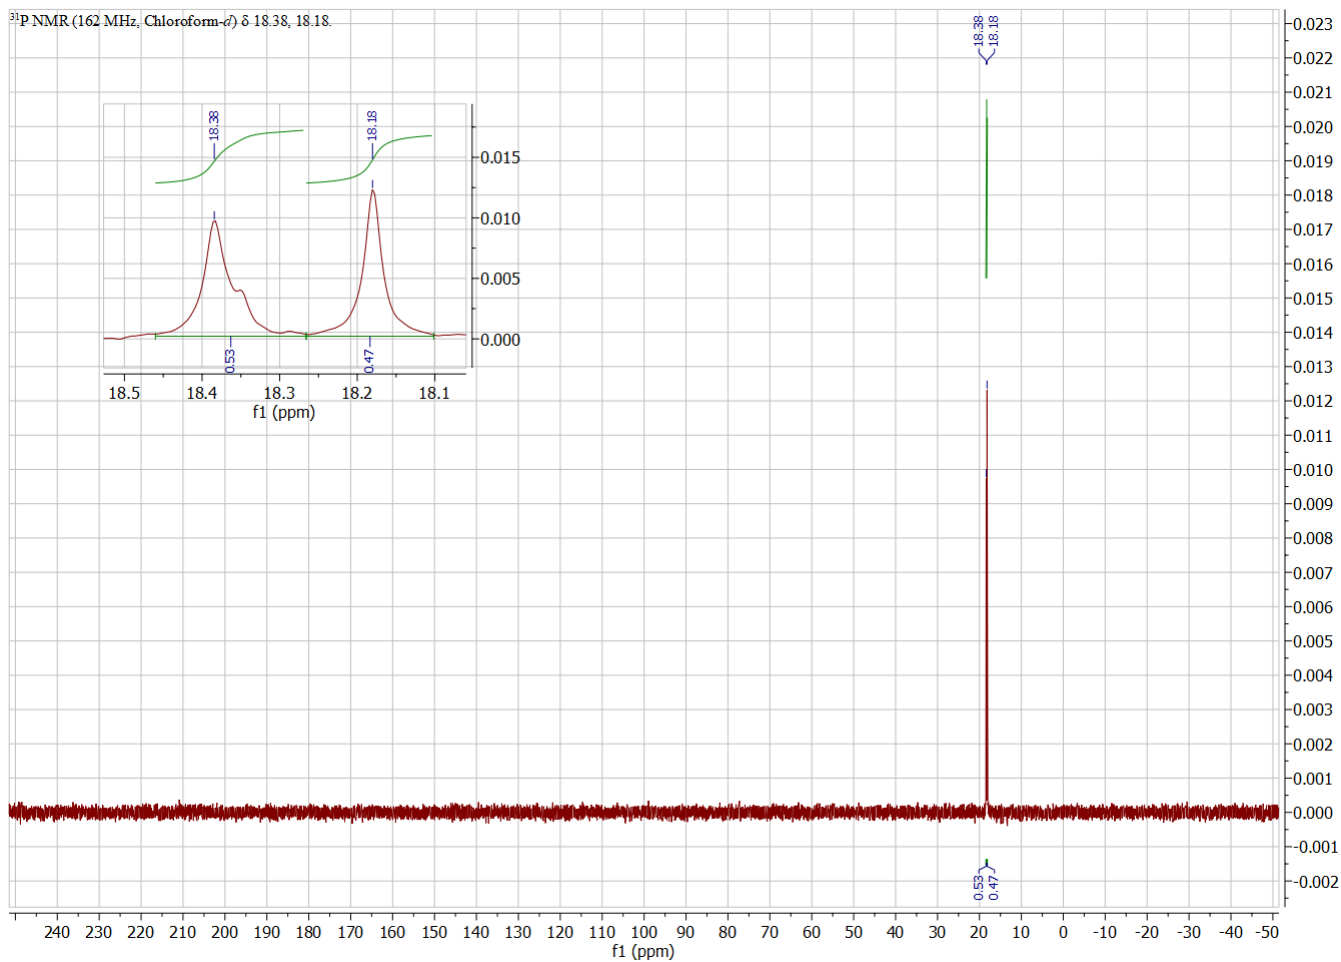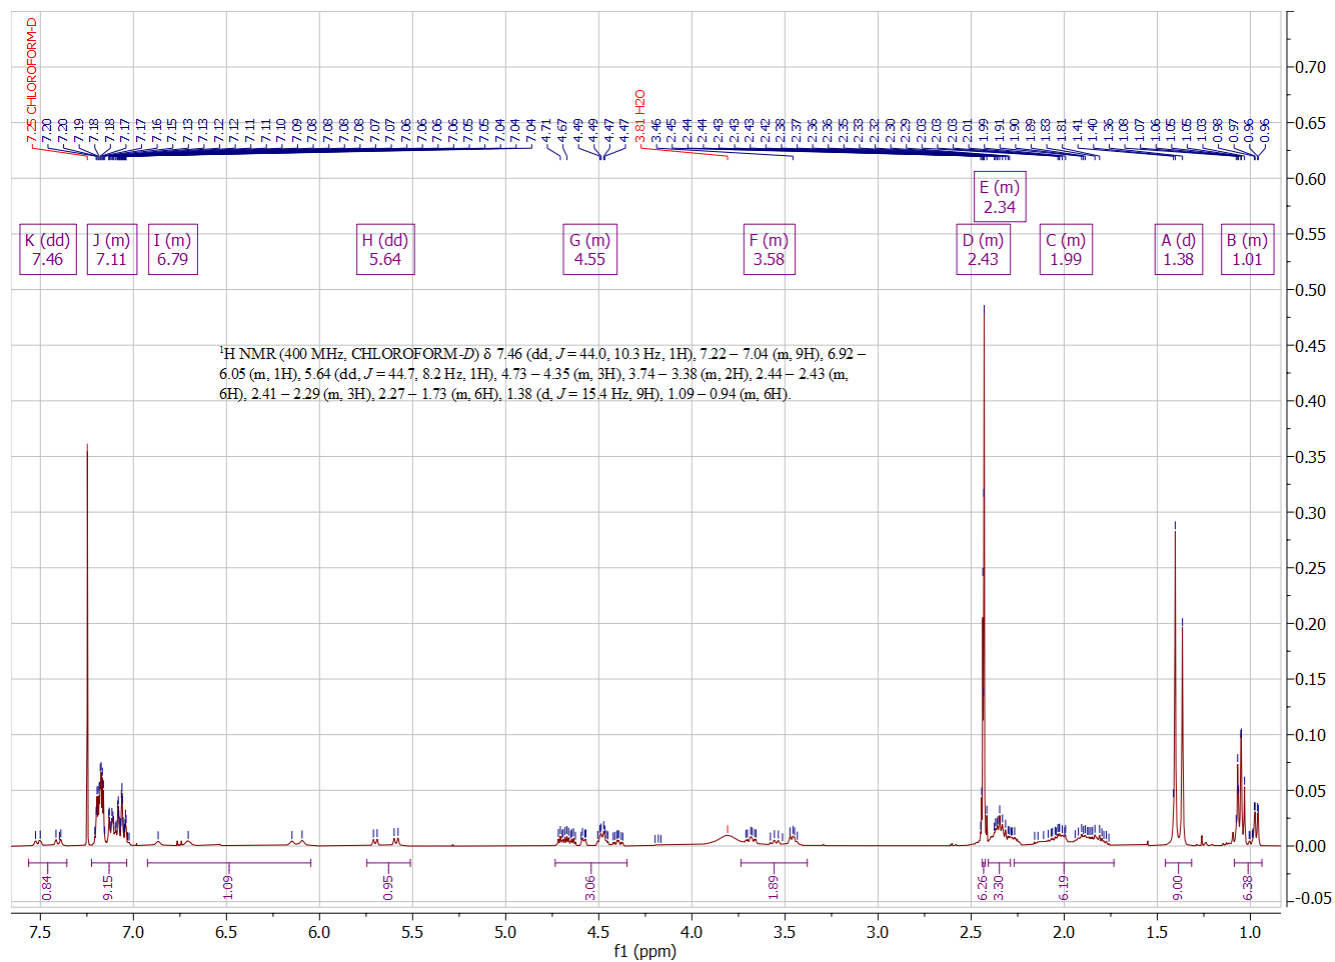

**(81) Boc-L-Pro-L-Pro-Val<sup>P</sup>(OPh-4-SCH<sub>3</sub>)<sub>2</sub>**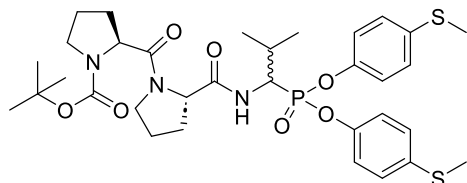

**Name:** *tert*-butyl (2*S*)-2-((2*S*)-2-((1-(bis(4-(methylthio)phenoxy)phosphoryl)-2-methylpropyl)carbamoyl)pyrrolidine-1-carbonyl)pyrrolidine-1-carboxylate

<sup>31</sup>P NMR (162 MHz, Chloroform-*d*) δ 18.78 (s, 62%), 18.17 (s, 26%), 18.06 (s, 12%).

<sup>1</sup>H NMR (400 MHz, Chloroform-*d*) δ 7.22 – 6.74 (m, 9H, 8xArH, NH), 4.83 – 4.19 (m, 3H, CHP, 2xCH), 3.79 – 3.27 (m, 4H, 2xCH<sub>2</sub>), 2.50 – 2.26 (m, 7H, 2xSCH<sub>3</sub>, CH), 2.25 – 1.54 (m, 8H, 4xCH<sub>2</sub>), 1.47 – 1.36 (m, 9H, Boc), 1.13 – 0.95 (m, 6H, 2xCH<sub>3</sub>).

**HRMS:** C<sub>33</sub>H<sub>46</sub>N<sub>3</sub>O<sub>7</sub>PS<sub>2</sub> [M+Na]<sup>+</sup> calc. 714.2412 found 714.2397

**HPLC:** purity >99%; retention time 17.957 and 18.187 min

**Chromatogram**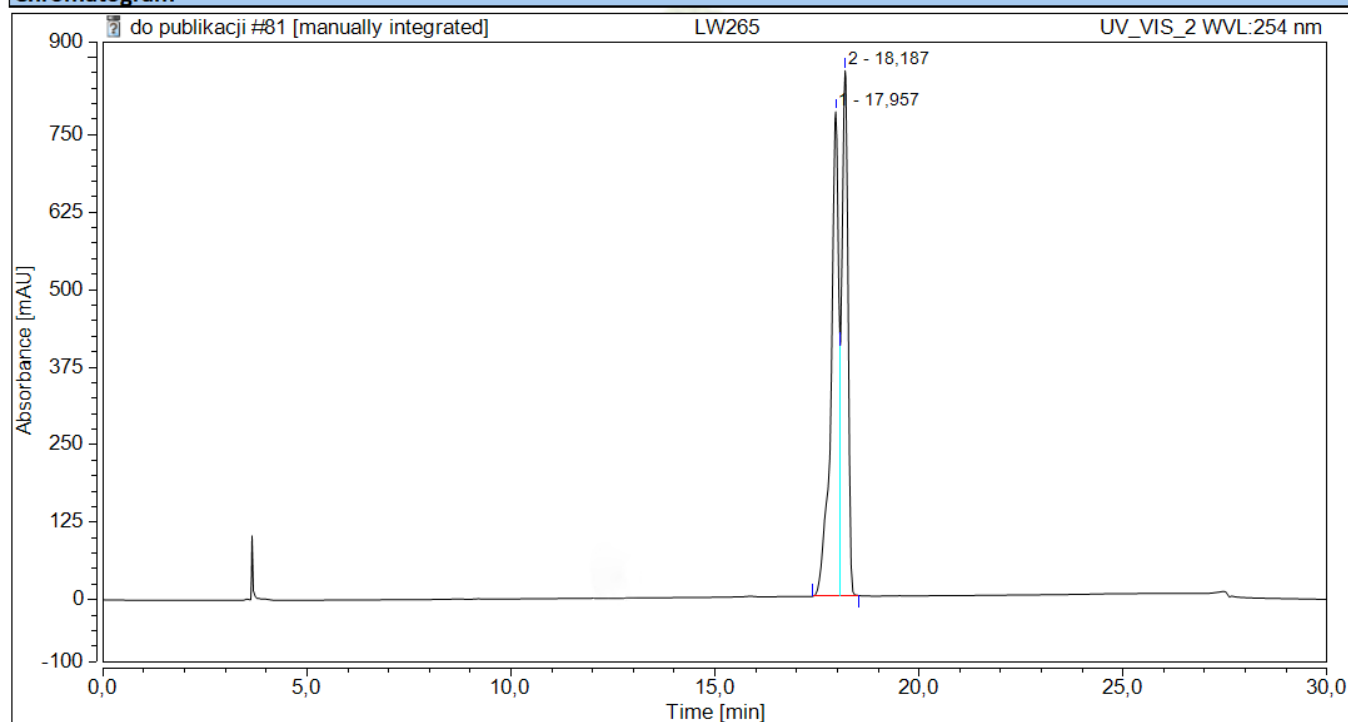**Integration Results**

| No.           | Peak Name | Retention Time<br>min | Area<br>mAU*min | Height<br>mAU   | Relative Area<br>% | Relative Height<br>% | Amount<br>n.a. |
|---------------|-----------|-----------------------|-----------------|-----------------|--------------------|----------------------|----------------|
| 1             |           | 17,957                | 171,868         | 781,102         | 54,03              | 47,97                | n.a.           |
| 2             |           | 18,187                | 146,213         | 847,087         | 45,97              | 52,03                | n.a.           |
| <b>Total:</b> |           |                       | <b>318,082</b>  | <b>1628,189</b> | <b>100,00</b>      | <b>100,00</b>        |                |

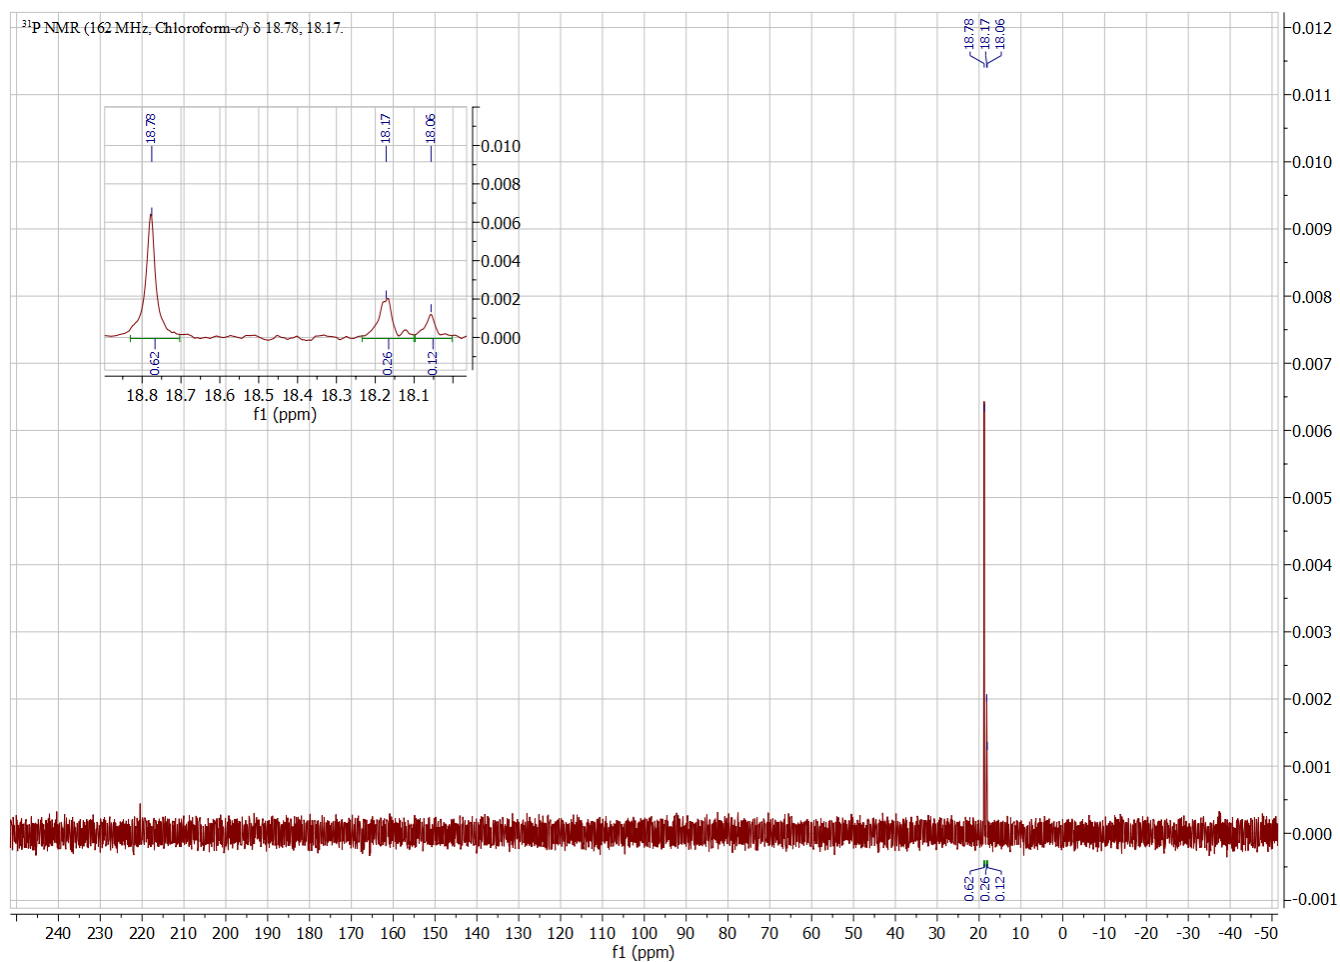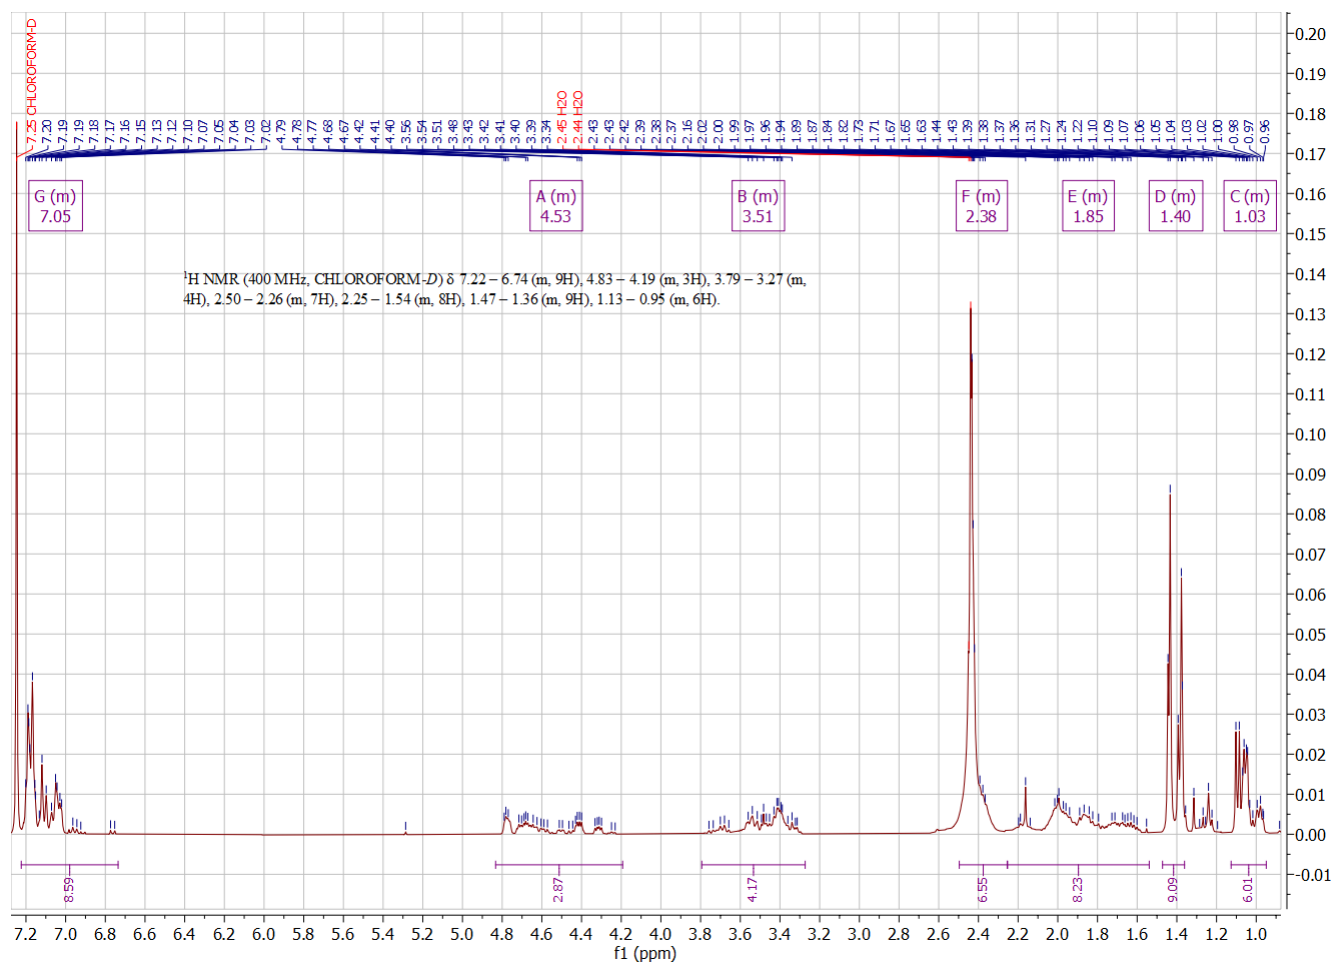

**(82) Boc-L-Pip-L-Pro-Val<sup>P</sup>(OPh-4-SCH<sub>3</sub>)<sub>2</sub>**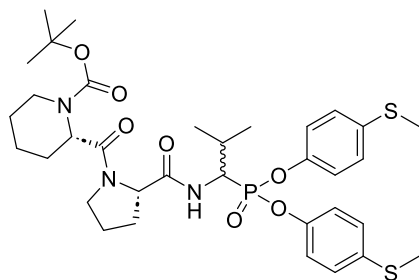

**Name:** *tert*-butyl (2*S*)-2-(((2*S*)-2-((1-(bis(4-(methylthio)phenoxy)phosphoryl)-2-methylpropyl)carbamoyl)pyrrolidine-1-carbonyl)piperidine-1-carboxylate

<sup>31</sup>P NMR (162 MHz, Chloroform-*d*) δ 18.58 (s, 62%), 18.15 (s, 38%).

<sup>1</sup>H NMR (400 MHz, Chloroform-*d*) δ 7.47 (s, 1H, NH), 7.22 – 6.97 (m, 8H, 8xArH), 5.13 – 4.39 (m, 3H, CHP, 2xCH), 4.13 – 3.75 (m, 1H, 0.5xCH<sub>2</sub>), 3.75 – 3.32 (m, 3H, 1.5xCH<sub>2</sub>), 2.45 – 2.42 (m, 6H, 2xSCH<sub>3</sub>), 2.41 – 2.22 (m, 2H, 0.5xCH<sub>2</sub>, CH), 2.17 – 1.93 (m, 2H, CH<sub>2</sub>), 1.92 – 1.69 (m, 2H, CH<sub>2</sub>), 1.68 – 1.45 (m, 5H, 2.5xCH<sub>2</sub>), 1.42 (d, *J* = 7.0 Hz, 9H, Boc), 1.14 – 0.95 (m, 6H, 2xCH<sub>3</sub>).

**HRMS:** C<sub>34</sub>H<sub>48</sub>N<sub>3</sub>O<sub>7</sub>PS<sub>2</sub> [M+Na]<sup>+</sup> calc. 728.2569 found 728.2562

**HPLC:** purity >99%; retention time 19.393 min

**Chromatogram**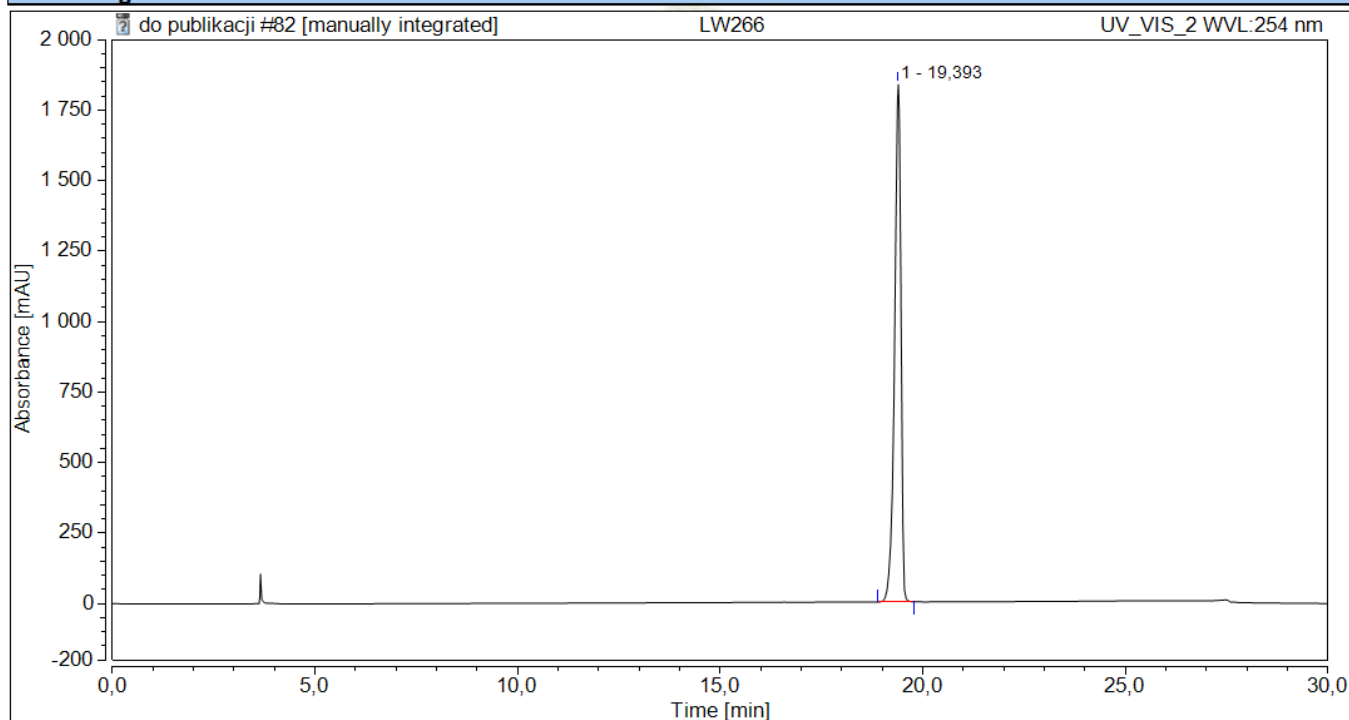**Integration Results**

| No.           | Peak Name | Retention Time<br>min | Area<br>mAU*min | Height<br>mAU   | Relative Area<br>% | Relative Height<br>% | Amount<br>n.a. |
|---------------|-----------|-----------------------|-----------------|-----------------|--------------------|----------------------|----------------|
| 1             |           | 19,393                | 332,232         | 1834,347        | 100,00             | 100,00               | n.a.           |
| <b>Total:</b> |           |                       | <b>332,232</b>  | <b>1834,347</b> | <b>100,00</b>      | <b>100,00</b>        |                |

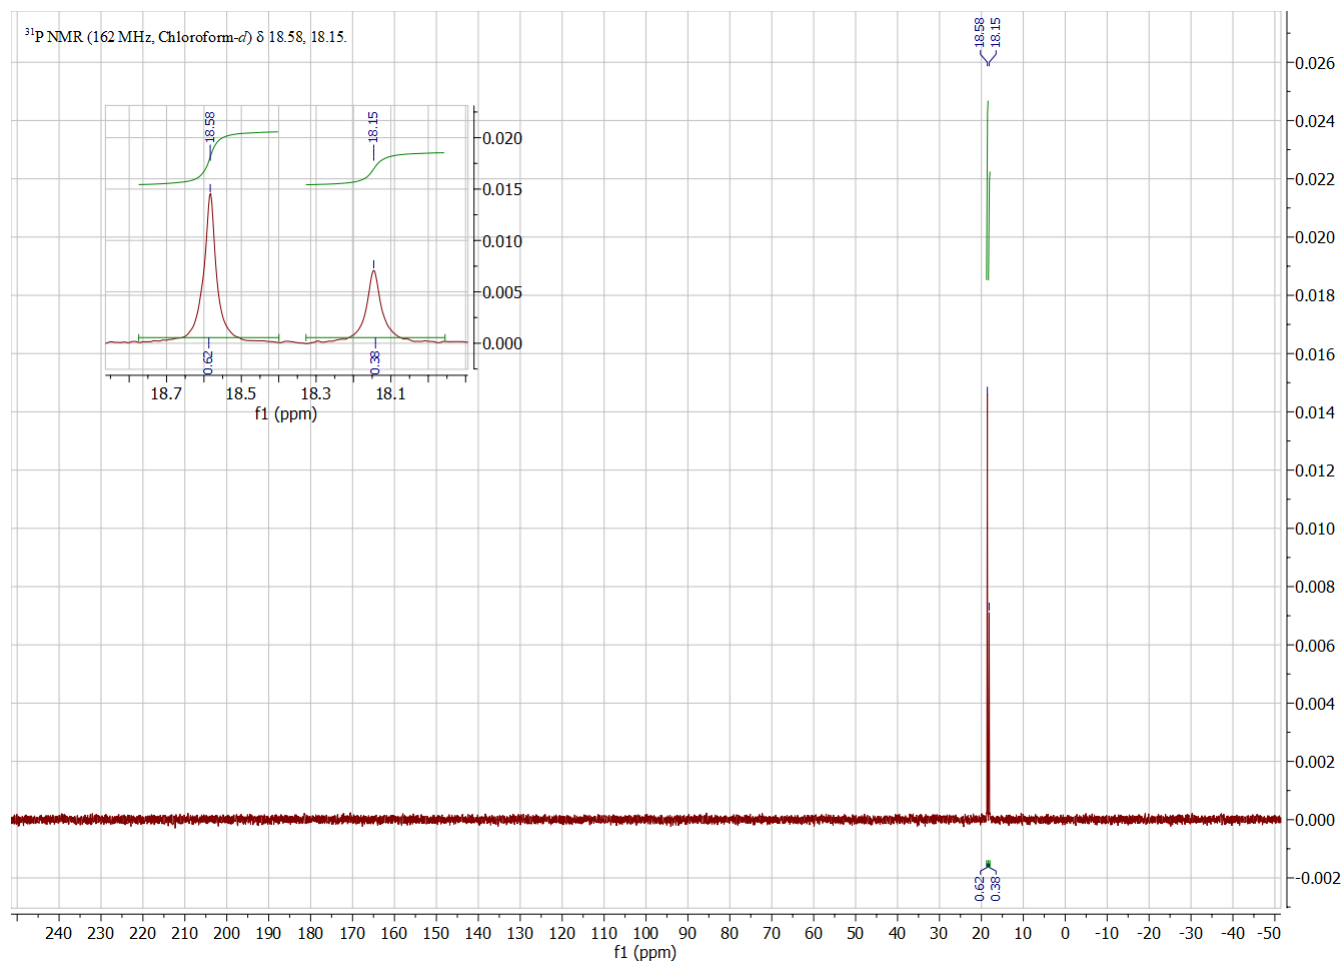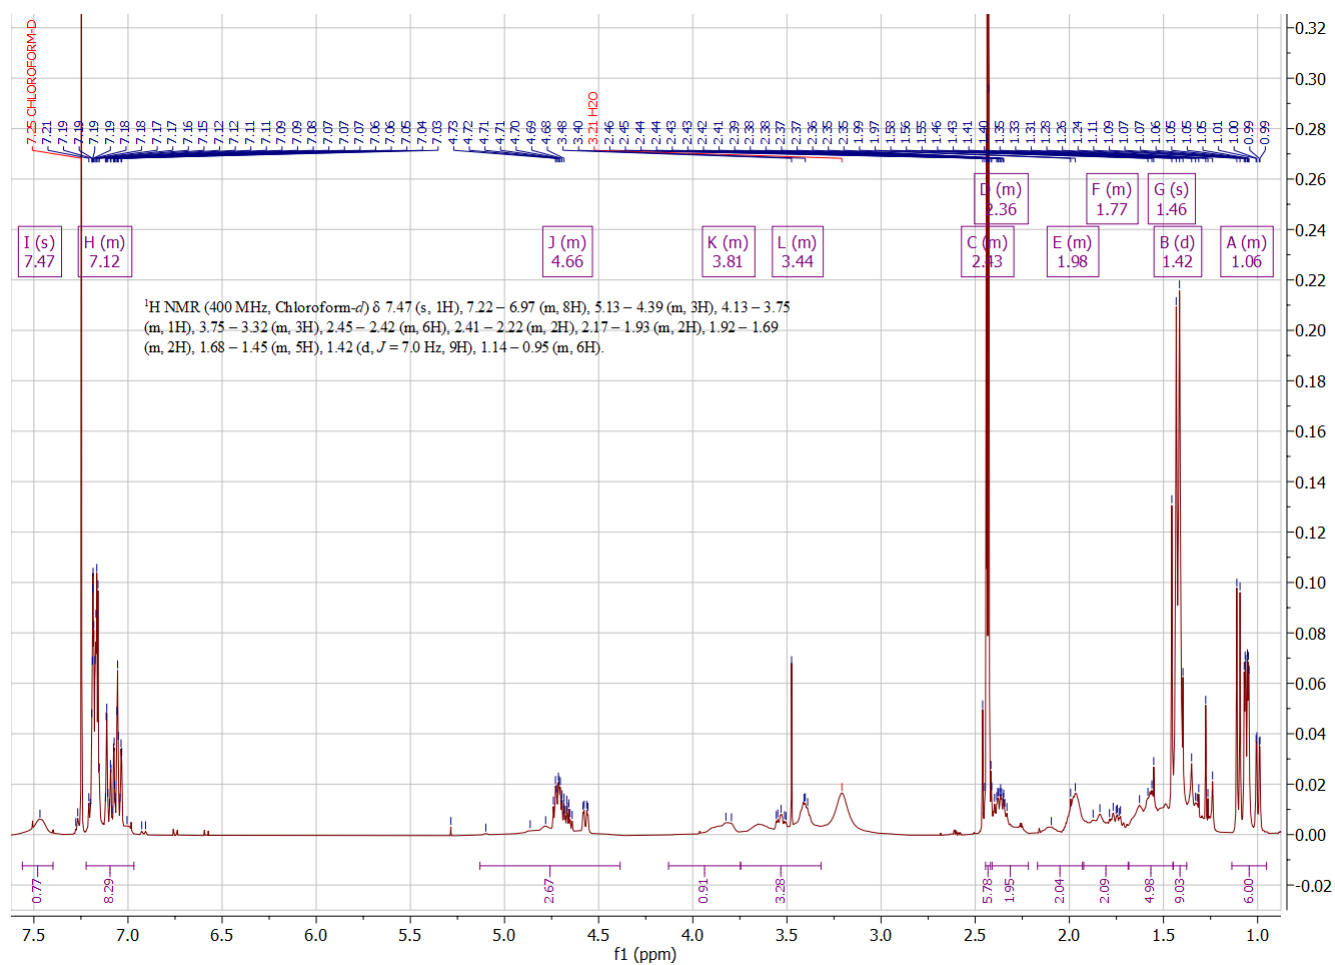

**(83) Boc-D-Pip-L-Pro- Val<sup>P</sup>(OPh-4-SCH<sub>3</sub>)<sub>2</sub>**

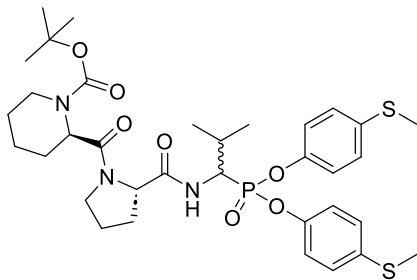

**Name:** *tert*-butyl (2R)-2-((2S)-2-((1-(bis(4-(methylthio)phenoxy)phosphoryl)-2-methylpropyl)carbamoyl)pyrrolidine-1-carbonyl)piperidine-1-carboxylate

<sup>31</sup>P NMR (162 MHz, Chloroform-d) δ 18.78 (s, 61%), 18.24 (s, 39%).

<sup>1</sup>H NMR (400 MHz, Chloroform-d) δ 7.69 – 7.25 (m, 1H, NH), 7.23 – 6.96 (m, 8H, 8xArH), 4.93 – 4.41 (m, 3H, CHP, 2xCH), 4.07 – 2.93 (m, 4H, 2xCH<sub>2</sub>), 2.49 – 2.41 (m, 6H, 2xSCH<sub>3</sub>), 2.41 – 2.11 (m, 2H, 0.5xCH<sub>2</sub>, CH), 2.10 – 1.80 (m, 4H, 2xCH<sub>2</sub>), 1.80 – 1.43 (m, 5H, 2.5xCH<sub>2</sub>), 1.39 (d, J = 5.4 Hz, 9H, Boc), 1.16 – 0.97 (m, 6H, 2xCH<sub>3</sub>).

**HRMS:** C<sub>34</sub>H<sub>48</sub>N<sub>3</sub>O<sub>7</sub>PS<sub>2</sub> [M+Na]<sup>+</sup> calc. 728.2569 found 728.2559

**HPLC:** purity >99%; retention time 19.637 min

**Chromatogram**

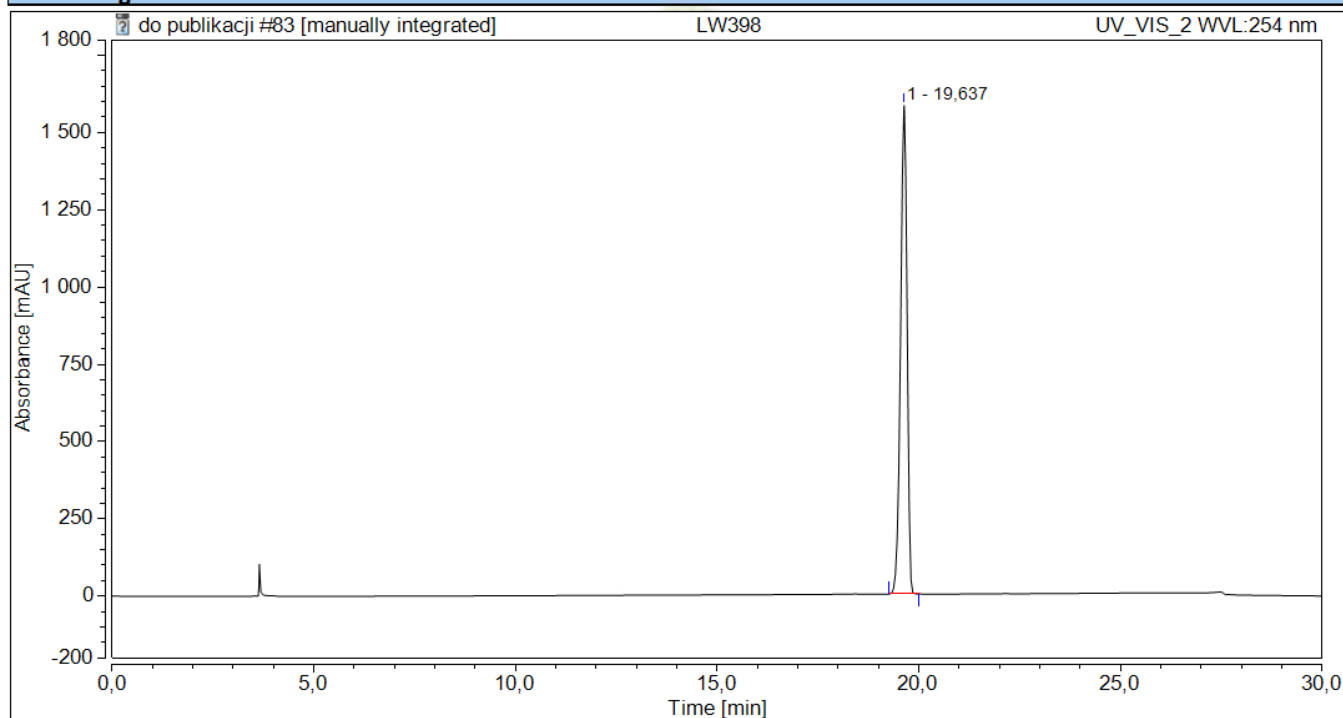

**Integration Results**

| No.           | Peak Name | Retention Time<br>min | Area<br>mAU*min | Height<br>mAU   | Relative Area<br>% | Relative Height<br>% | Amount<br>n.a. |
|---------------|-----------|-----------------------|-----------------|-----------------|--------------------|----------------------|----------------|
| 1             |           | 19,637                | 295,547         | 1580,758        | 100,00             | 100,00               | n.a.           |
| <b>Total:</b> |           |                       | <b>295,547</b>  | <b>1580,758</b> | <b>100,00</b>      | <b>100,00</b>        |                |



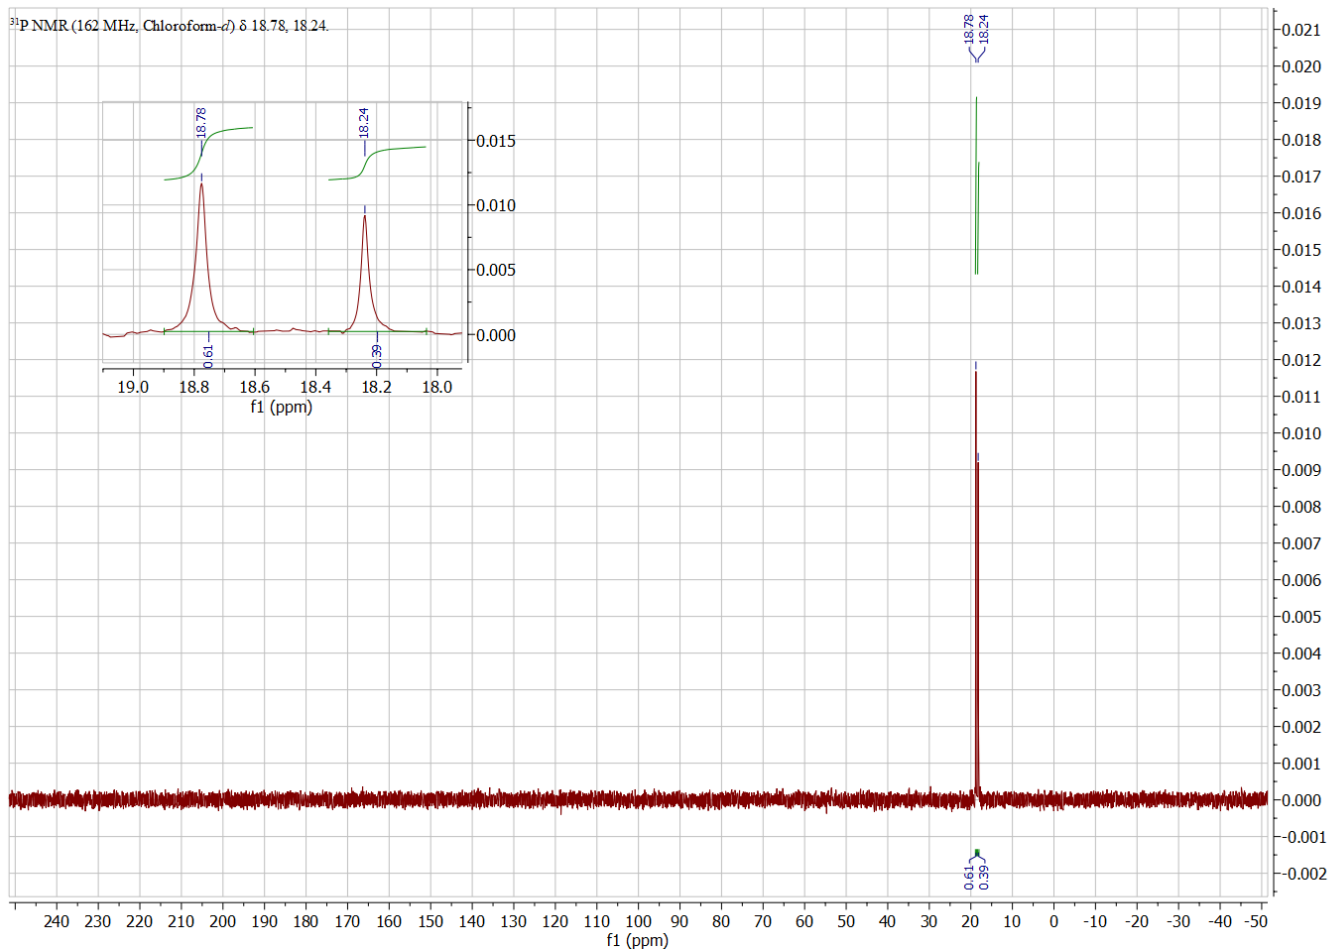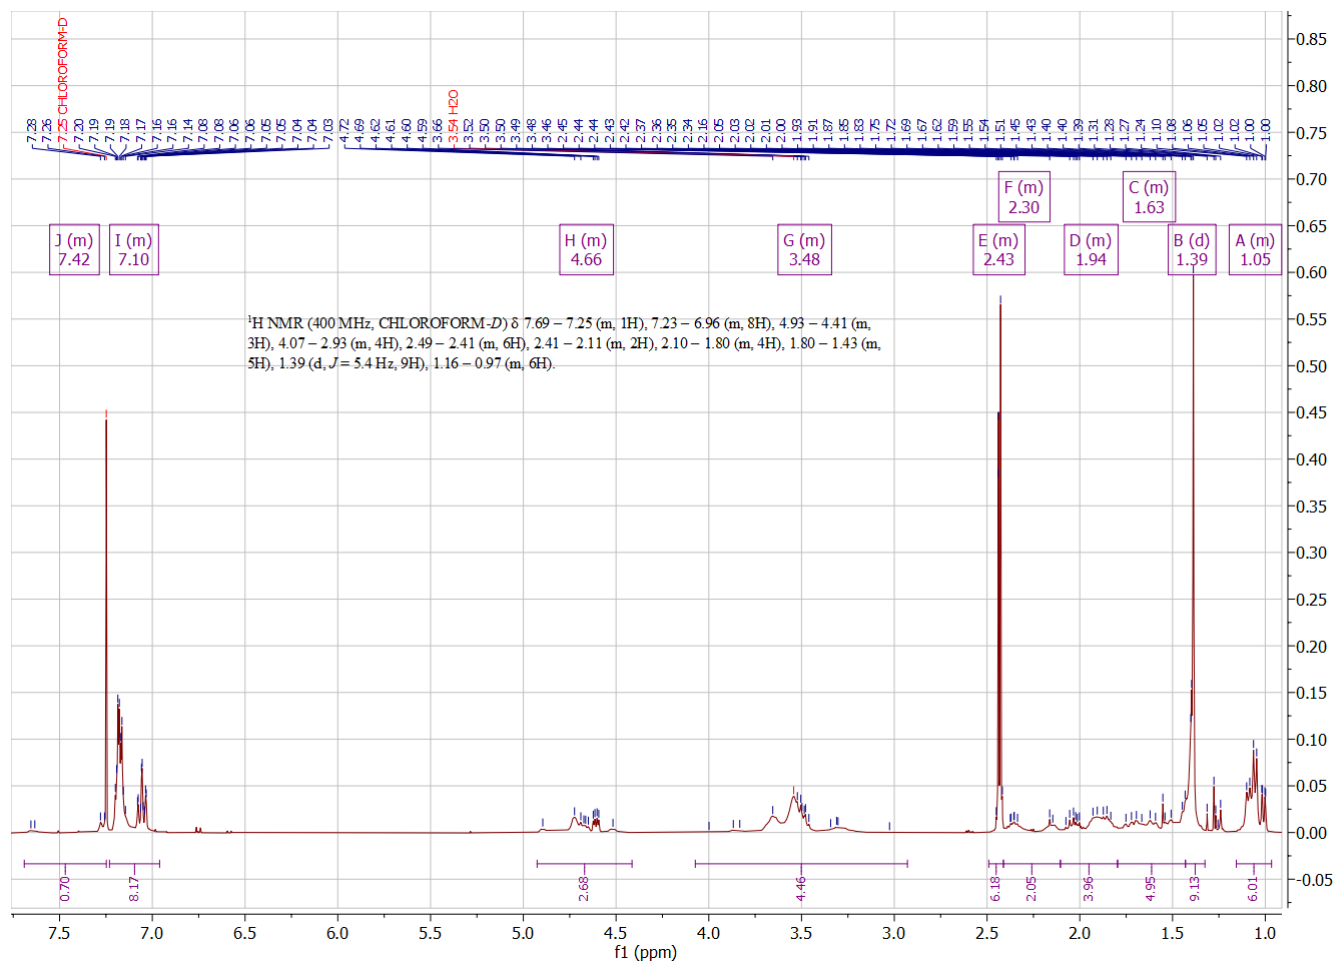

**(84) Boc-L-Nip-L-Pro- Val<sup>P</sup>(OPh-4-SCH<sub>3</sub>)<sub>2</sub>**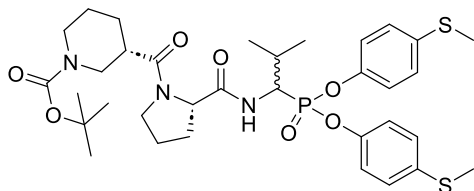

**Name:** *tert*-butyl (3*S*)-3-((2*S*)-2-((1-(bis(4-(methylthio)phenoxy)phosphoryl)-2-methylpropyl)carbamoyl)pyrrolidine-1-carbonyl)piperidine-1-carboxylate

<sup>31</sup>P NMR (162 MHz, Chloroform-*d*) δ 18.61 (s, 63%), 18.20 (s, 37%).

<sup>1</sup>H NMR (400 MHz, Chloroform-*d*) δ 7.72 (t, *J* = 9.9 Hz, 1H, NH), 7.24 – 6.96 (m, 8H, 8xArH), 4.81 – 4.51 (m, 2H, CHP, CH), 4.31 – 3.86 (m, 2H, CH, 0.5xCH<sub>2</sub>), 3.76 – 3.33 (m, 2H, CH<sub>2</sub>), 2.71 – 2.45 (m, 3H, CH<sub>2</sub>, CH), 2.45 – 2.41 (m, 6H, 2xSCH<sub>3</sub>), 2.41 – 2.23 (m, 2H, CH<sub>2</sub>), 2.23 – 1.59 (m, 6H, 3xCH<sub>2</sub>), 1.48 – 1.28 (m, 10H, Boc, 0.5xCH<sub>2</sub>), 1.12 – 0.94 (m, 6H, 2xCH<sub>3</sub>).

**HRMS:** C<sub>34</sub>H<sub>48</sub>N<sub>3</sub>O<sub>7</sub>PS<sub>2</sub> [M+Na]<sup>+</sup> calc. 728.2569 found 728.2551

**HPLC:** purity >99%; retention time 18.507 and 18.693 min

**Chromatogram**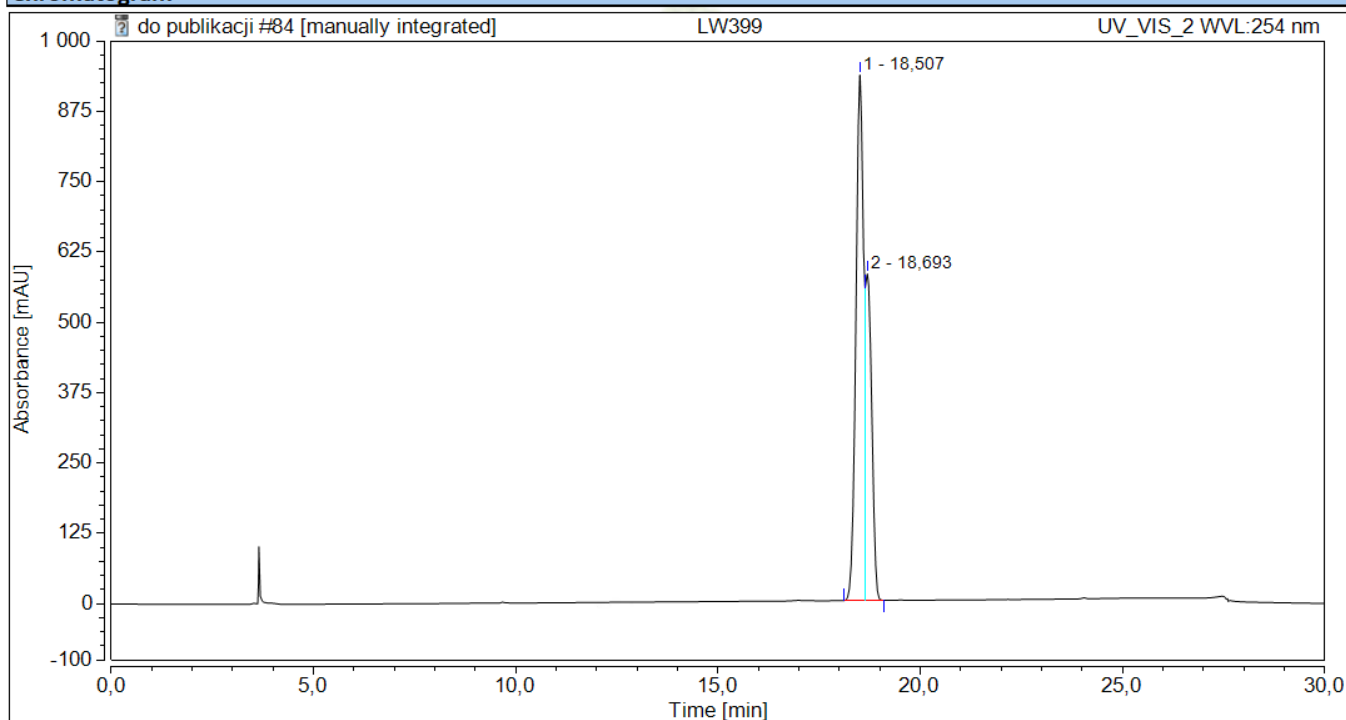**Integration Results**

| No.           | Peak Name | Retention Time<br>min | Area<br>mAU*min | Height<br>mAU   | Relative Area<br>% | Relative Height<br>% | Amount<br>n.a. |
|---------------|-----------|-----------------------|-----------------|-----------------|--------------------|----------------------|----------------|
| 1             |           | 18,507                | 201,725         | 933,655         | 65,80              | 61,67                | n.a.           |
| 2             |           | 18,693                | 104,834         | 580,257         | 34,20              | 38,33                | n.a.           |
| <b>Total:</b> |           |                       | <b>306,558</b>  | <b>1513,912</b> | <b>100,00</b>      | <b>100,00</b>        |                |

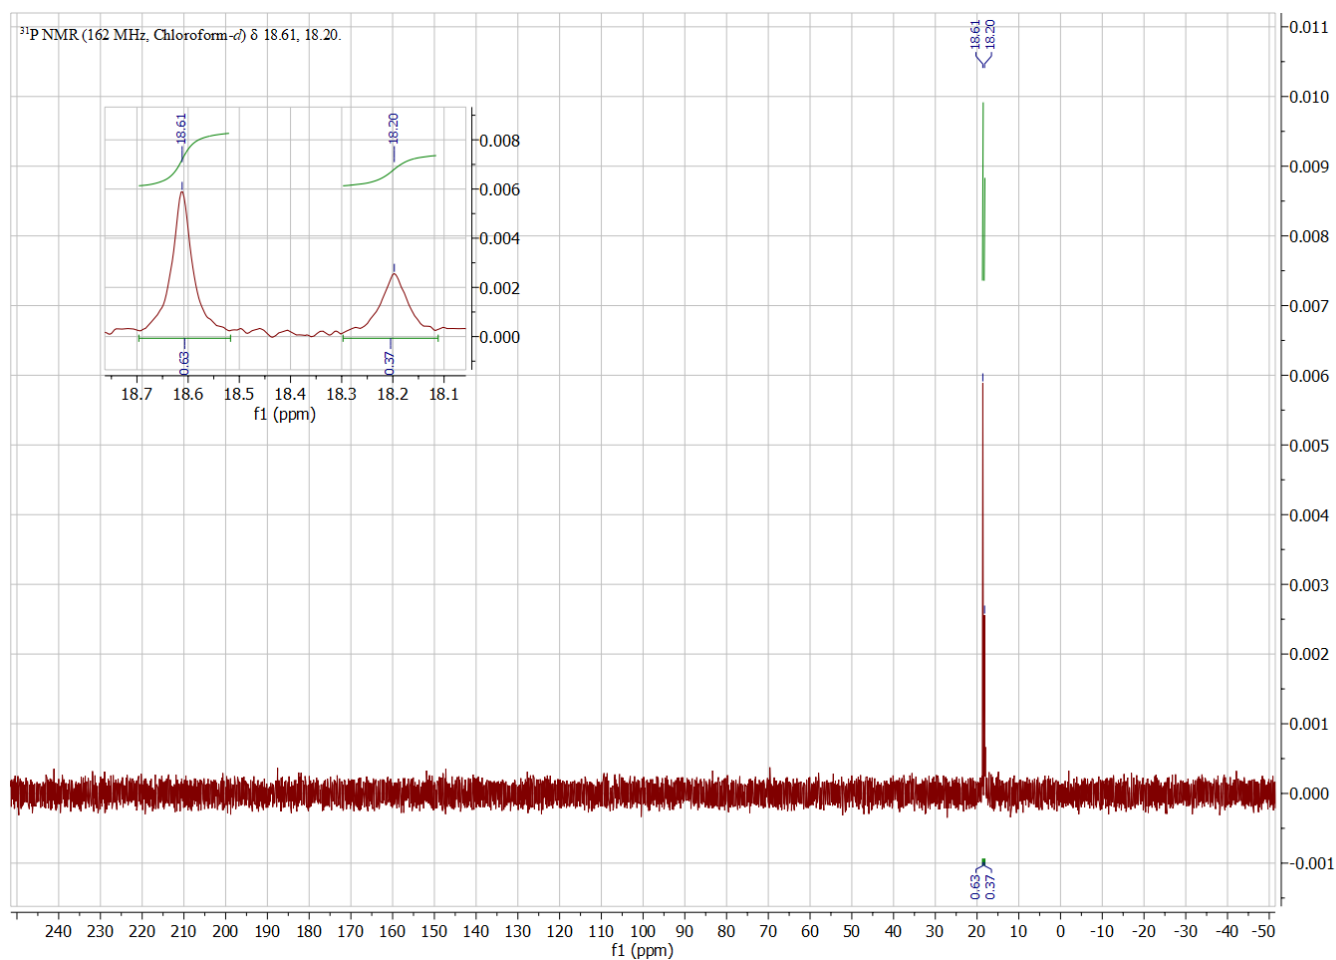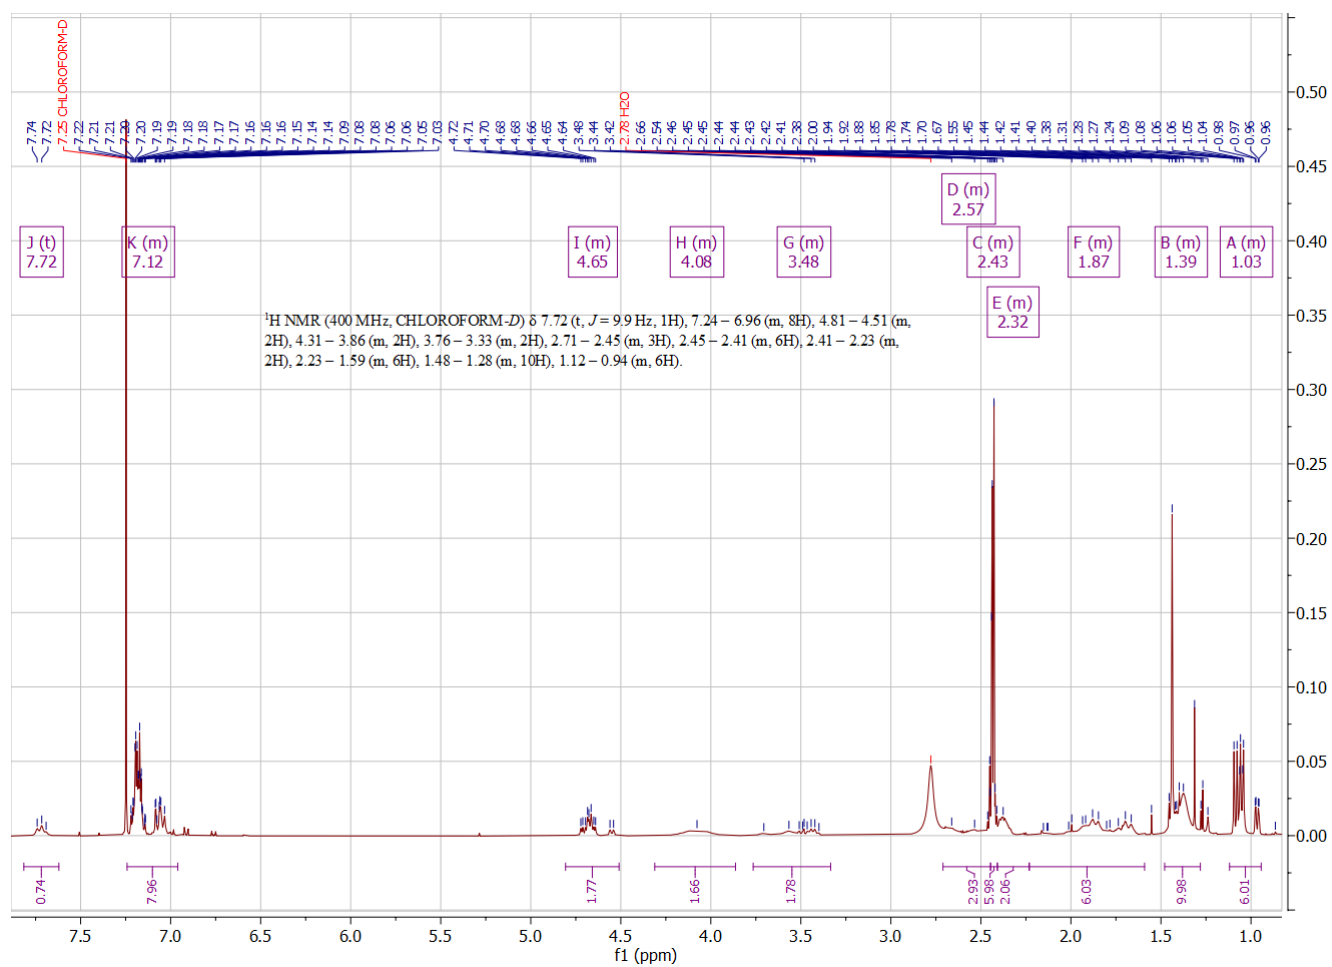

**(85) Boc-D-Nip-L-Pro- Val<sup>P</sup>(OPh-4-SCH<sub>3</sub>)<sub>2</sub>**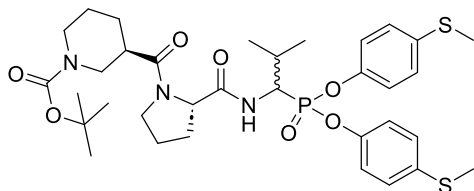

**Name:** *tert*-butyl (3R)-3-((2S)-2-((1-(bis(4-(methylthio)phenoxy)phosphoryl)-2-methylpropyl)carbamoyl)pyrrolidine-1-carboxylate

<sup>31</sup>P NMR (162 MHz, Chloroform-d) δ 18.42 (s, 64%), 18.16 (s, 36%).

<sup>1</sup>H NMR (400 MHz, Chloroform-d) δ 7.66 (dd, J = 23.5, 10.3 Hz, 1H, NH), 7.23 – 6.95 (m, 8H, 8xArH), 4.77 – 4.52 (m, 2H, CHP, CH), 4.22 – 3.92 (m, 2H, 0.5xCH<sub>2</sub>, CH), 3.55 – 3.34 (m, 2H, CH<sub>2</sub>), 2.98 – 2.47 (m, 2H, CH<sub>2</sub>), 2.46 – 2.42 (m, 6H, 2xSCH<sub>3</sub>), 2.42 – 2.22 (m, 3H, CH<sub>2</sub>, CH), 2.20 – 1.68 (m, 4H, 2xCH<sub>2</sub>), 1.68 – 1.47 (m, 2H, CH<sub>2</sub>), 1.44 (d, J = 5.3 Hz, 9H, Boc), 1.39 – 1.23 (m, 1H, 0.5xCH<sub>2</sub>), 1.12 – 0.93 (m, 6H, 2xCH<sub>3</sub>).

**HRMS:** C<sub>34</sub>H<sub>48</sub>N<sub>3</sub>O<sub>7</sub>PS<sub>2</sub> [M+Na]<sup>+</sup> calc. 728.2569 found 728.2559

**HPLC:** purity >99%; retention time 18.417 and 18.743 min

**Chromatogram**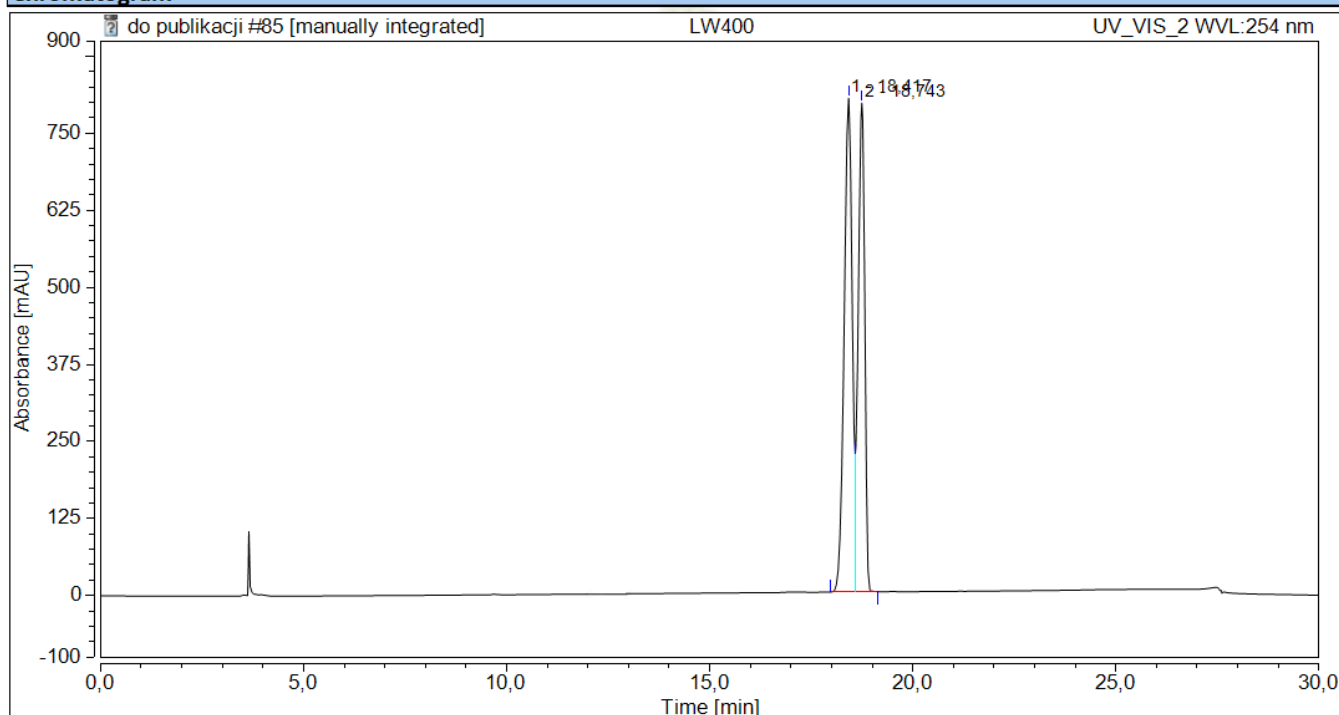**Integration Results**

| No.           | Peak Name | Retention Time<br>min | Area<br>mAU*min | Height<br>mAU   | Relative Area<br>% | Relative Height<br>% | Amount |
|---------------|-----------|-----------------------|-----------------|-----------------|--------------------|----------------------|--------|
| 1             |           | 18,417                | 183,706         | 801,197         | 55,23              | 50,25                | n.a.   |
| 2             |           | 18,743                | 148,924         | 793,146         | 44,77              | 49,75                | n.a.   |
| <b>Total:</b> |           |                       | <b>332,631</b>  | <b>1594,343</b> | <b>100,00</b>      | <b>100,00</b>        |        |

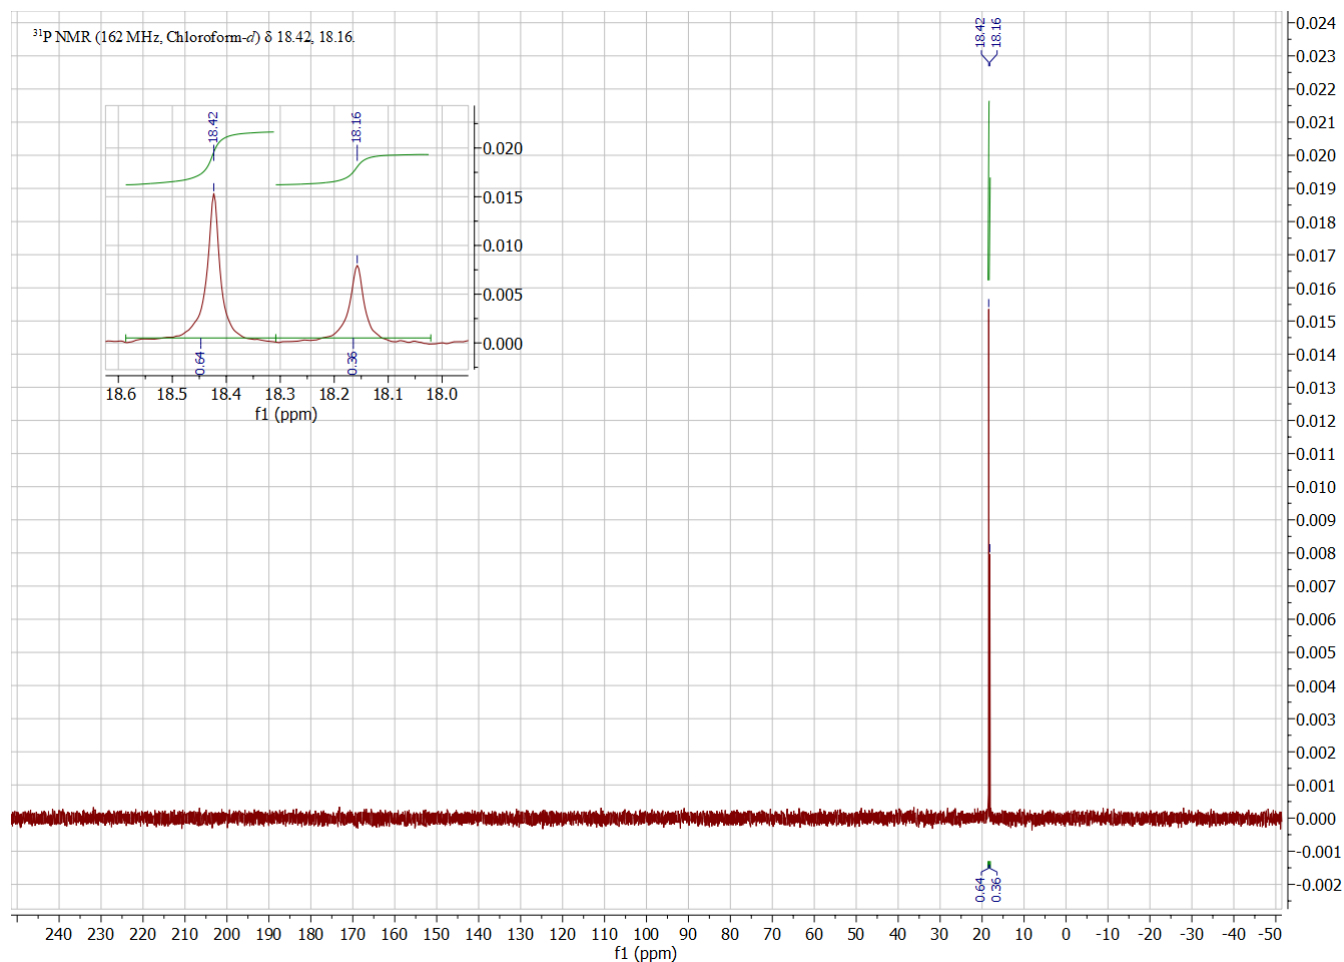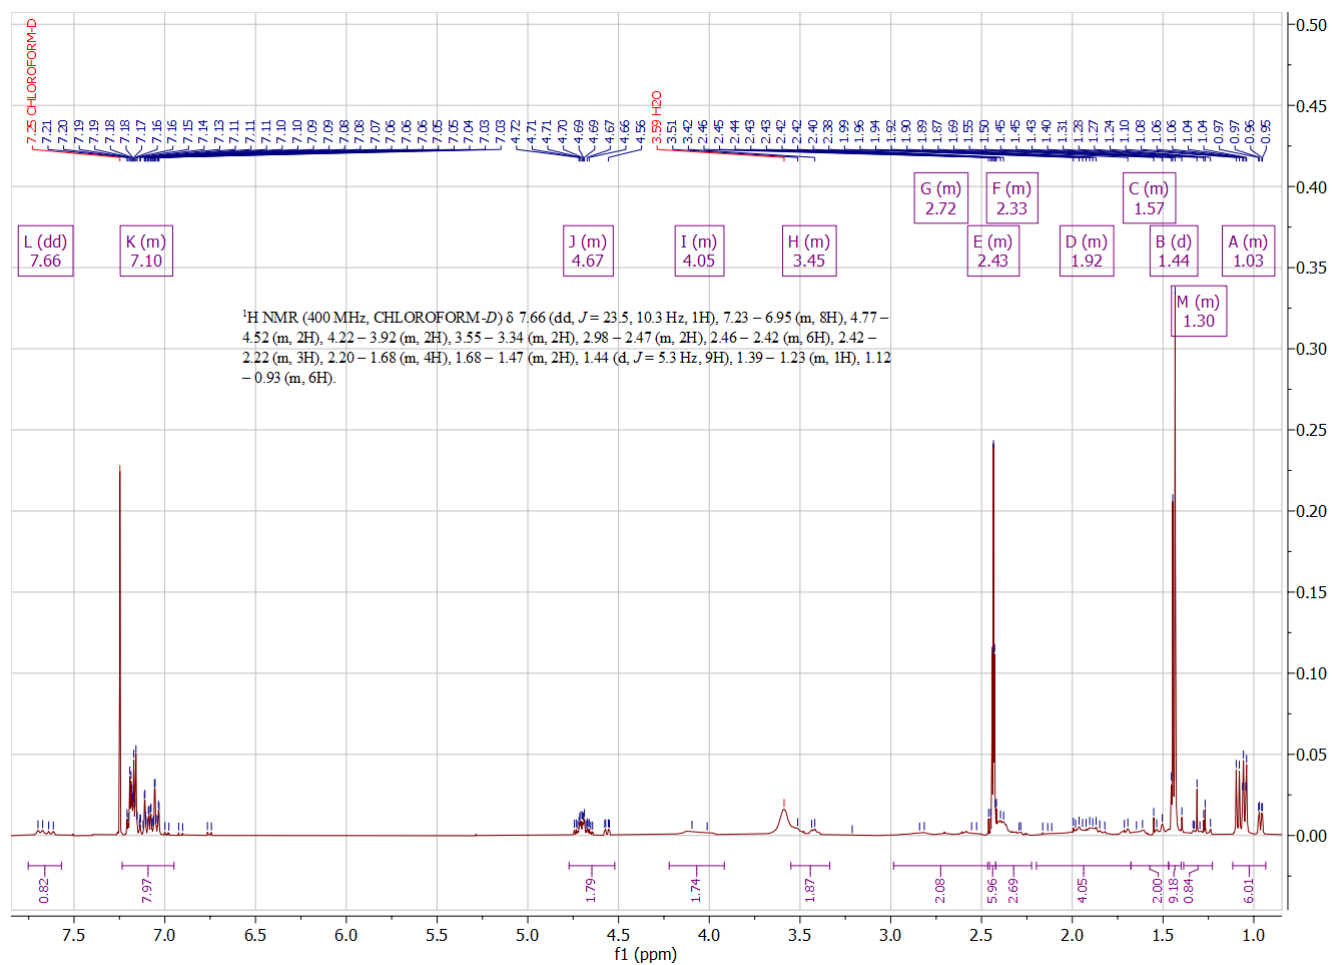

**(86) Boc-1,4-cis-ACHC-L-Pro-Val<sup>P</sup>(OPh-4-SCH<sub>3</sub>)<sub>2</sub>**

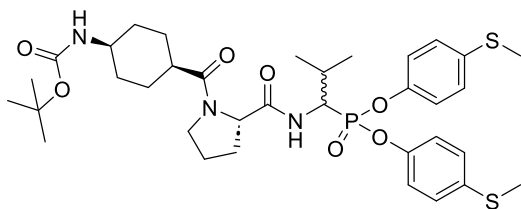

**Name:** *tert*-butyl ((1*R*,4*s*)-4-((2*S*)-2-((1-(bis(4-(methylthio)phenoxy)phosphoryl)-2-methylpropyl)carbamoyl)pyrrolidine-1-carbonyl)cyclohexyl)carbamate

<sup>31</sup>P NMR (162 MHz, Chloroform-*d*) δ 18.01 (s, 48%), 17.96 (s, 52%).

<sup>1</sup>H NMR (400 MHz, Chloroform-*d*) δ 7.53 (dd, *J* = 30.1, 10.4 Hz, 1H, NH), 7.22 – 6.89 (m, 8H, 8xArH), 4.84 – 4.47 (m, 2H, NH, CHP), 3.88 – 3.39 (m, 3H, CH, CH<sub>2</sub>), 2.45 – 2.42 (m, 6H, 2xSCH<sub>3</sub>), 2.42 – 1.46 (m, 15H, 6xCH<sub>2</sub>, 3xCH), 1.43 (s, 9H, Boc), 1.16 – 0.95 (m, 6H, 2xCH<sub>3</sub>).

**HRMS:** C<sub>35</sub>H<sub>50</sub>N<sub>3</sub>O<sub>7</sub>PS<sub>2</sub> [M+Na]<sup>+</sup> calc. 742.2725 found 742.2712

**HPLC:** purity >99%; retention time 18.063 min

**Chromatogram**

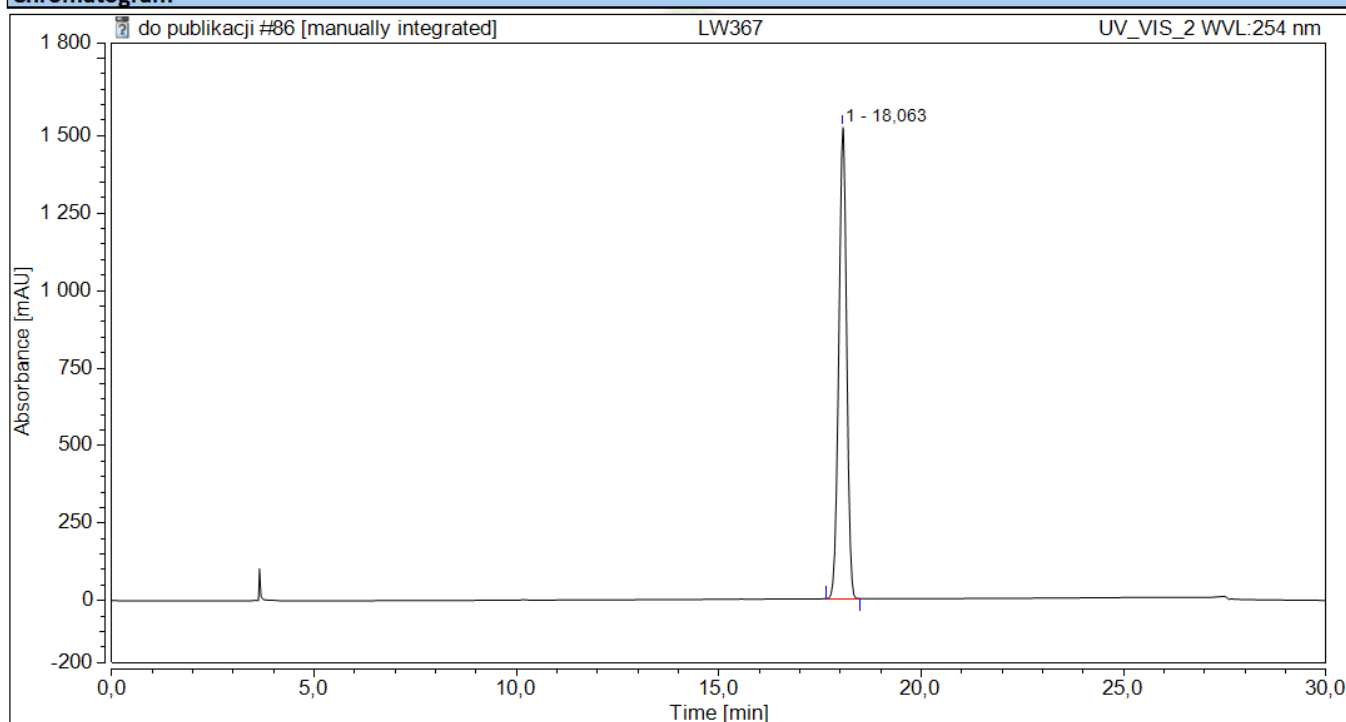

**Integration Results**

| No.           | Peak Name | Retention Time<br>min | Area<br>mAU*min | Height<br>mAU   | Relative Area<br>% | Relative Height<br>% | Amount<br>n.a. |
|---------------|-----------|-----------------------|-----------------|-----------------|--------------------|----------------------|----------------|
| 1             |           | 18,063                | 341,633         | 1520,614        | 100,00             | 100,00               | n.a.           |
| <b>Total:</b> |           |                       | <b>341,633</b>  | <b>1520,614</b> | <b>100,00</b>      | <b>100,00</b>        |                |

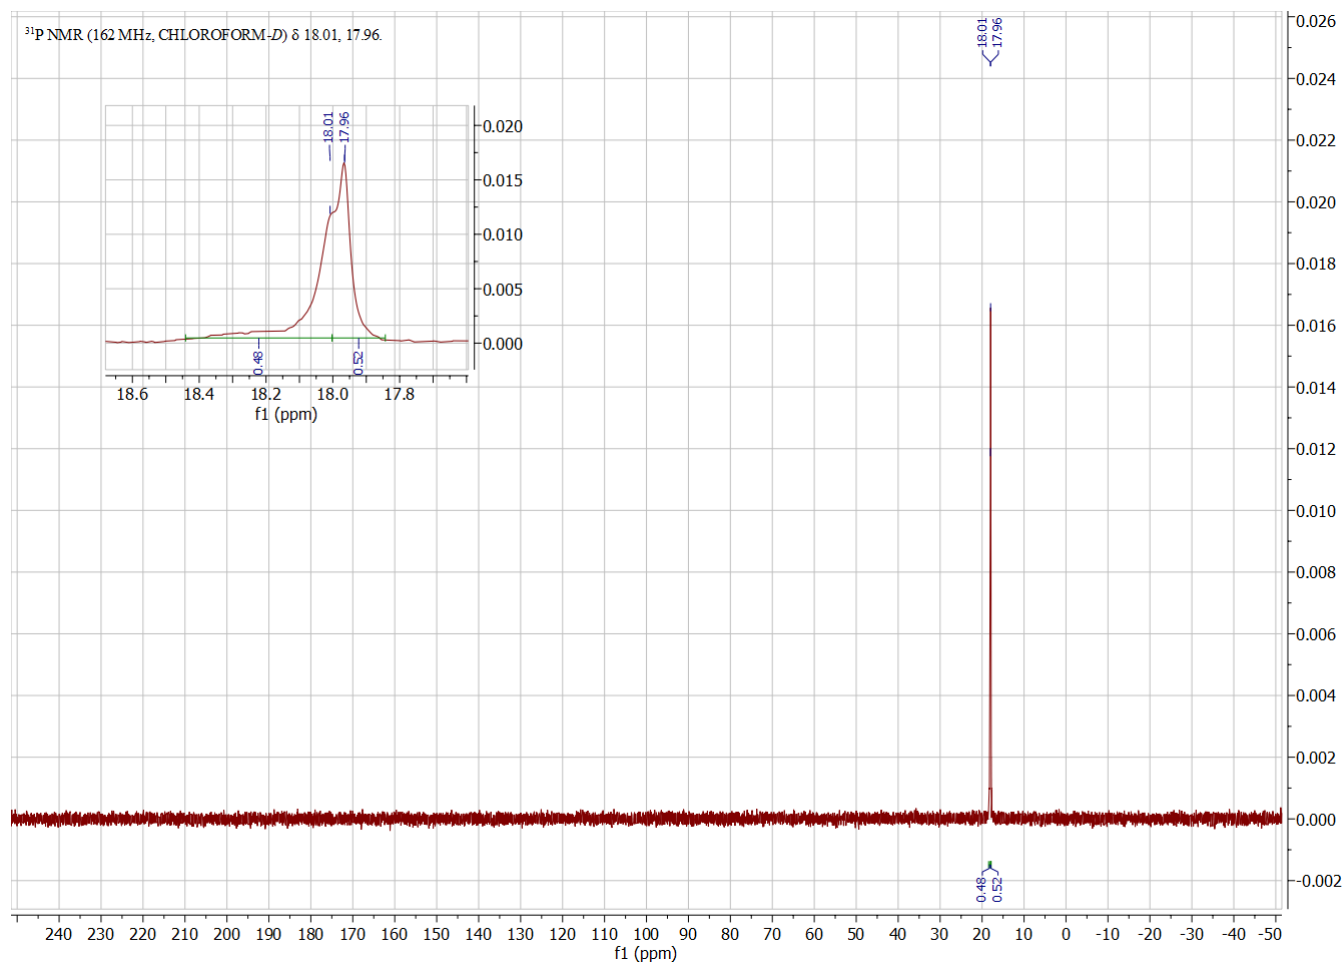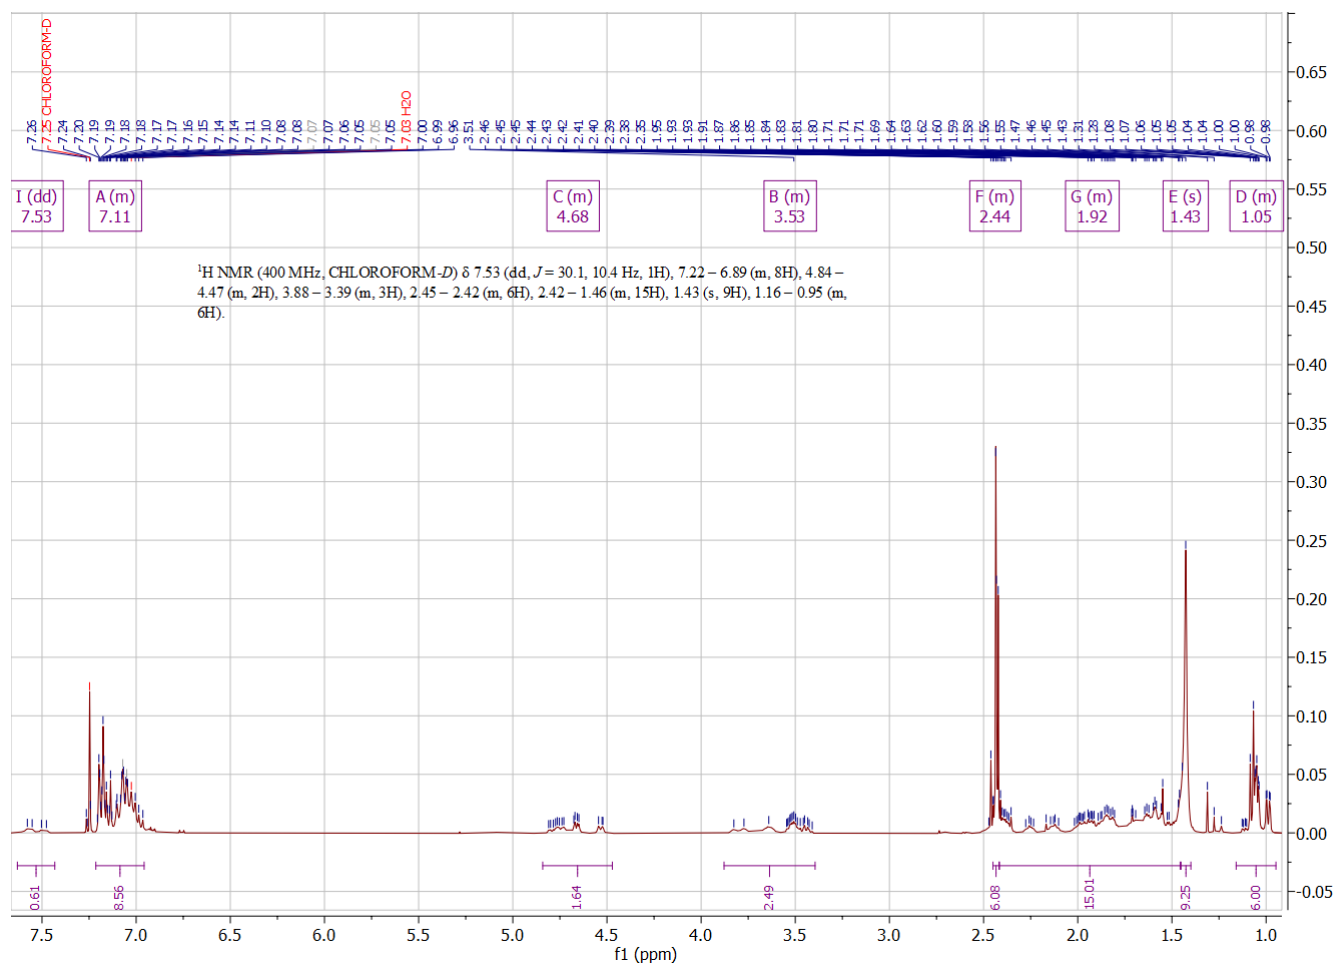

**(87) Boc-1,4-trans-ACHC-L-Pro-Val<sup>P</sup>(OPh-4-SCH<sub>3</sub>)<sub>2</sub>**

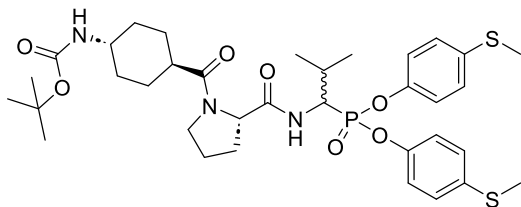

**Name:** *tert*-butyl ((1*S*,4*r*)-4-((2*S*)-2-((1-(bis(4-(methylthio)phenoxy)phosphoryl)-2-methylpropyl)carbamoyl)pyrrolidine-1-carbonyl)cyclohexyl)carbamate

<sup>31</sup>P NMR (162 MHz, Chloroform-*d*) δ 18.70 (s, 49%), 18.15 (s, 51%).

<sup>1</sup>H NMR (400 MHz, Chloroform-*d*) δ 7.75 (d, *J* = 10.3 Hz, 1H, NH), 7.21 – 6.94 (m, 8H, 8xArH), 4.78 – 4.30 (m, 2H, NH, CHP), 3.69 – 3.17 (m, 3H, CH<sub>2</sub>, CH), 2.49 – 2.41 (m, 6H), 2.41 – 1.50 (m, 15H, 6xCH<sub>2</sub>, 3xCH), 1.43 (s, 9H, Boc), 1.09 – 0.91 (m, 6H, 2xCH<sub>3</sub>).

**HRMS:** C<sub>35</sub>H<sub>50</sub>N<sub>3</sub>O<sub>7</sub>PS<sub>2</sub> [M+Na]<sup>+</sup> calc. 742.2725 found 742.2707

**HPLC:** purity >99%; retention time 17.807 min

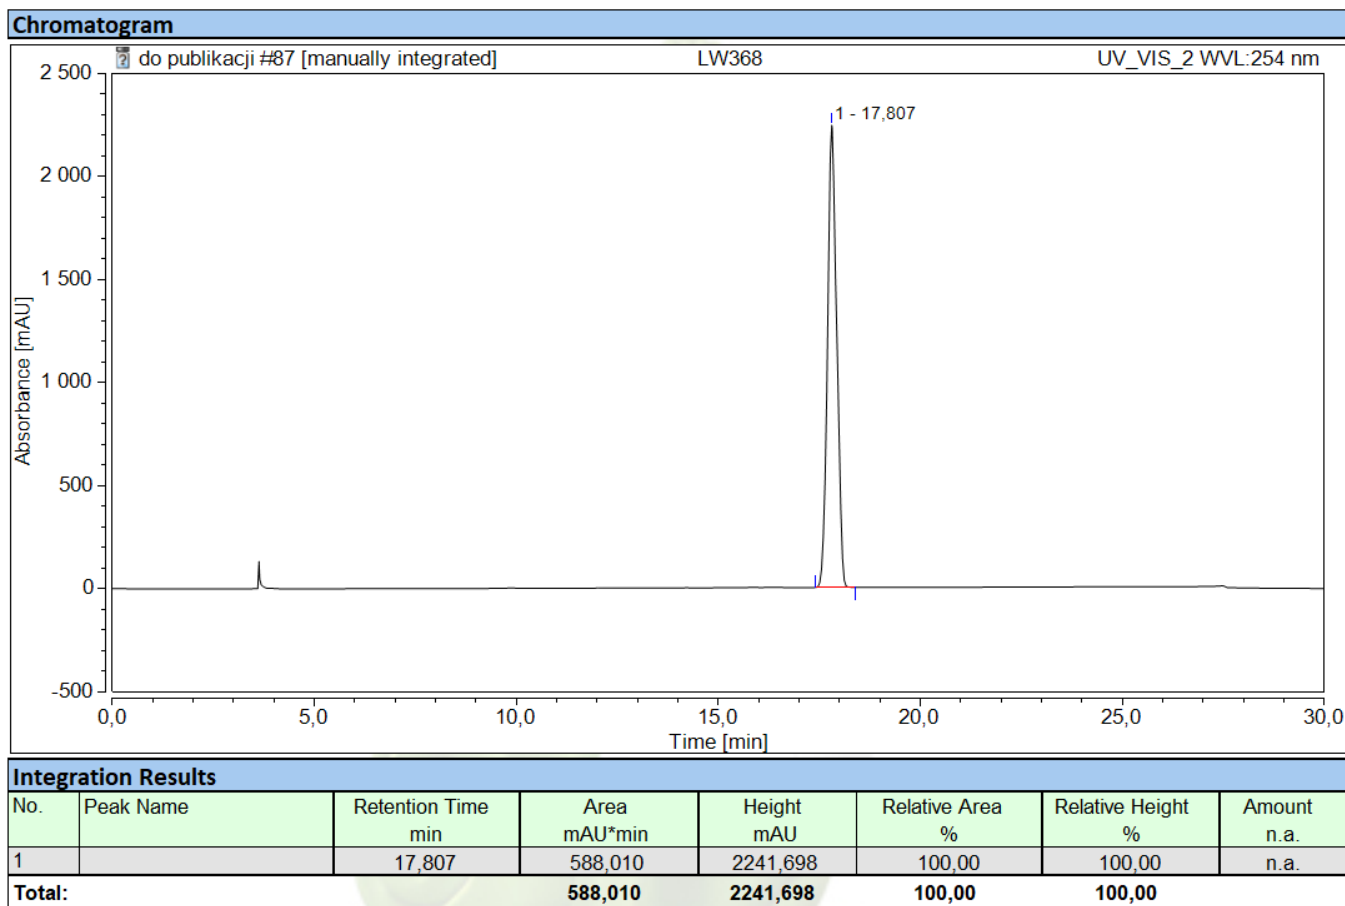



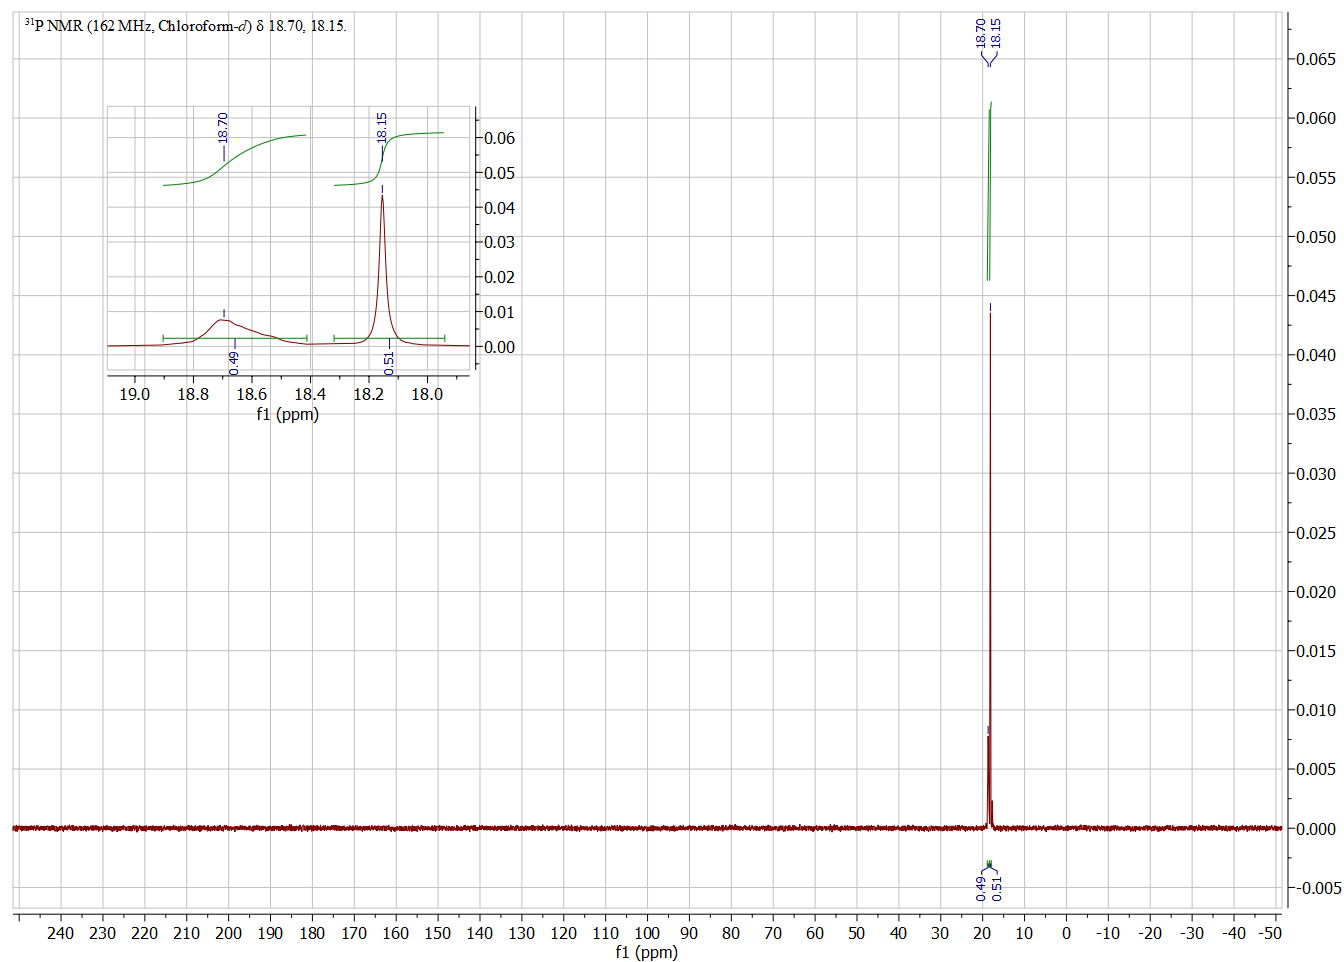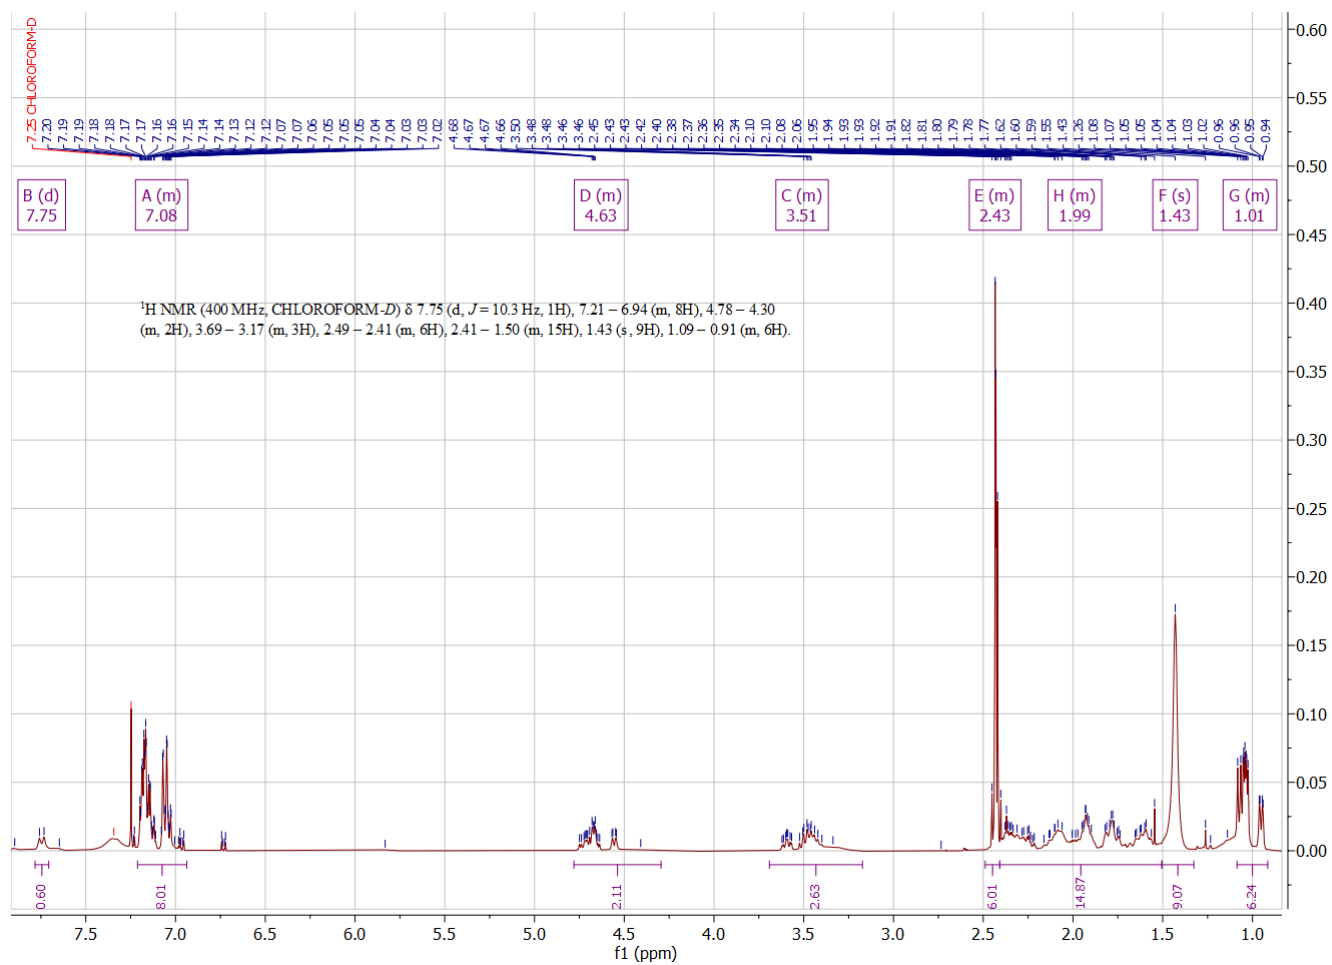

(88) Boc-L-Cpg-L-Pro-Val<sup>P</sup>(OPh-4-SCH<sub>3</sub>)<sub>2</sub>

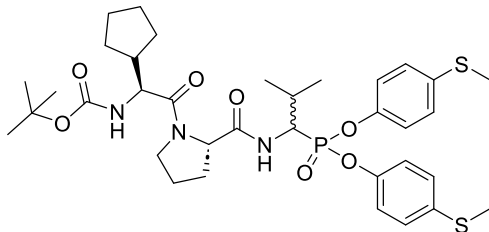

**Name:** *tert*-butyl ((1*S*)-2-((2*S*)-2-((1-(bis(4-(methylthio)phenoxy)phosphoryl)-2-methylpropyl)carbamoyl)pyrrolidin-1-yl)-1-cyclopentyl-2-oxoethyl)carbamate

<sup>31</sup>P NMR (162 MHz, Chloroform-*d*) δ 18.36 (s, 48%), 17.98 (s, 52%).

<sup>1</sup>H NMR (400 MHz, Chloroform-*d*) δ 7.34 – 7.25 (m, 1H, NH), 7.23 – 7.13 (m, 4H, 4xArH), 7.13 – 7.02 (m, 4H, 4xArH), 5.35 (dd, *J* = 30.9, 8.9 Hz, 1H, NH), 4.79 – 4.69 (m, 1H, CHP), 4.69 – 4.46 (m, 1H, CH), 4.40 – 4.27 (m, 1H, CH), 3.88 – 3.77 (m, 1H, 0.5xCH<sub>2</sub>), 3.69 – 3.53 (m, 1H, 0.5xCH<sub>2</sub>), 2.43 (d, *J* = 1.2 Hz, 6H, 2xSCH<sub>3</sub>), 2.42 – 2.16 (m, 2H, 2xCH), 2.16 – 1.82 (m, 4H, 2xCH<sub>2</sub>), 1.74 – 1.58 (m, 3H, 1.5xCH<sub>2</sub>), 1.57 – 1.45 (m, 2H, CH<sub>2</sub>), 1.40 (d, *J* = 2.3 Hz, 9H, Boc), 1.38 – 1.22 (m, 3H, 1.5xCH<sub>2</sub>), 1.11 – 0.99 (m, 6H, 2xCH<sub>3</sub>).

**HRMS:** C<sub>35</sub>H<sub>50</sub>N<sub>3</sub>O<sub>7</sub>PS<sub>2</sub> [M+Na]<sup>+</sup> calc. 742.2725 found 742.2720

**HPLC:** purity >99%; retention time 19.760 min

**Chromatogram**

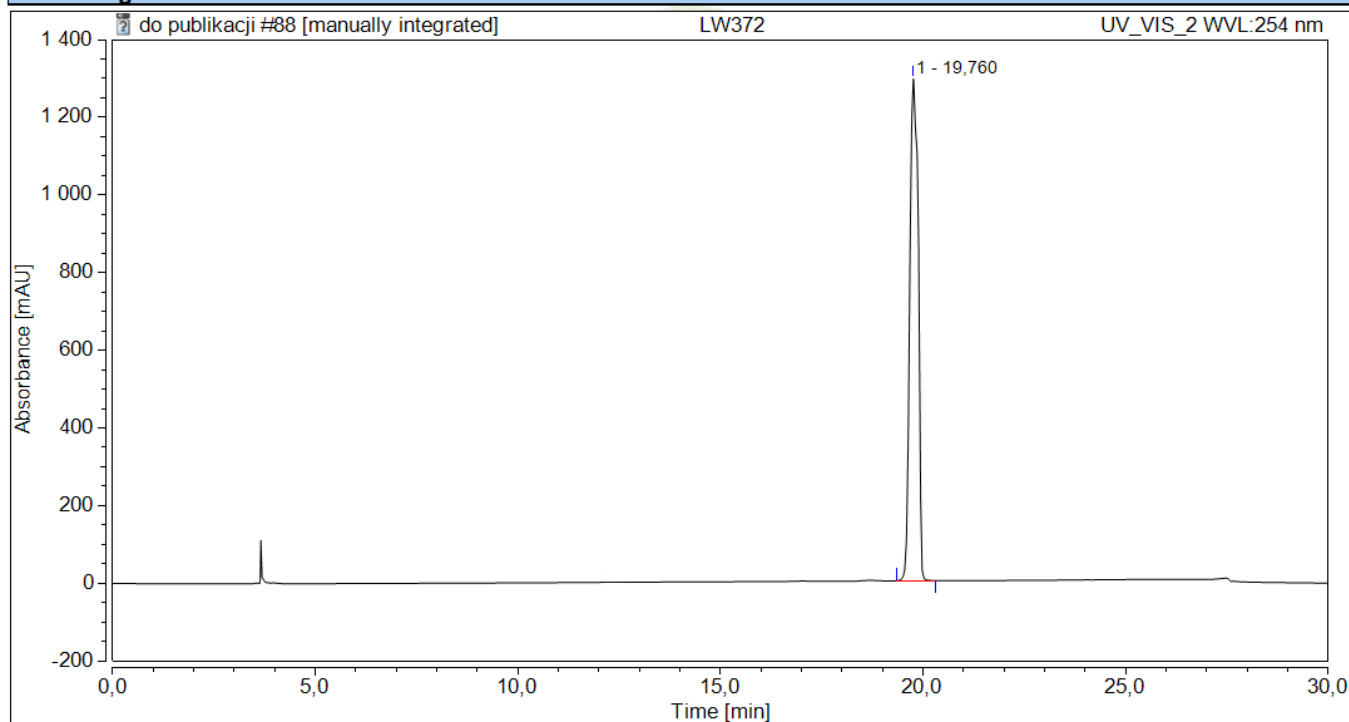

**Integration Results**

| No.           | Peak Name | Retention Time<br>min | Area<br>mAU*min | Height<br>mAU   | Relative Area<br>% | Relative Height<br>% | Amount<br>n.a. |
|---------------|-----------|-----------------------|-----------------|-----------------|--------------------|----------------------|----------------|
| 1             |           | 19,760                | 312,769         | 1292,252        | 100,00             | 100,00               | n.a.           |
| <b>Total:</b> |           |                       | <b>312,769</b>  | <b>1292,252</b> | <b>100,00</b>      | <b>100,00</b>        |                |

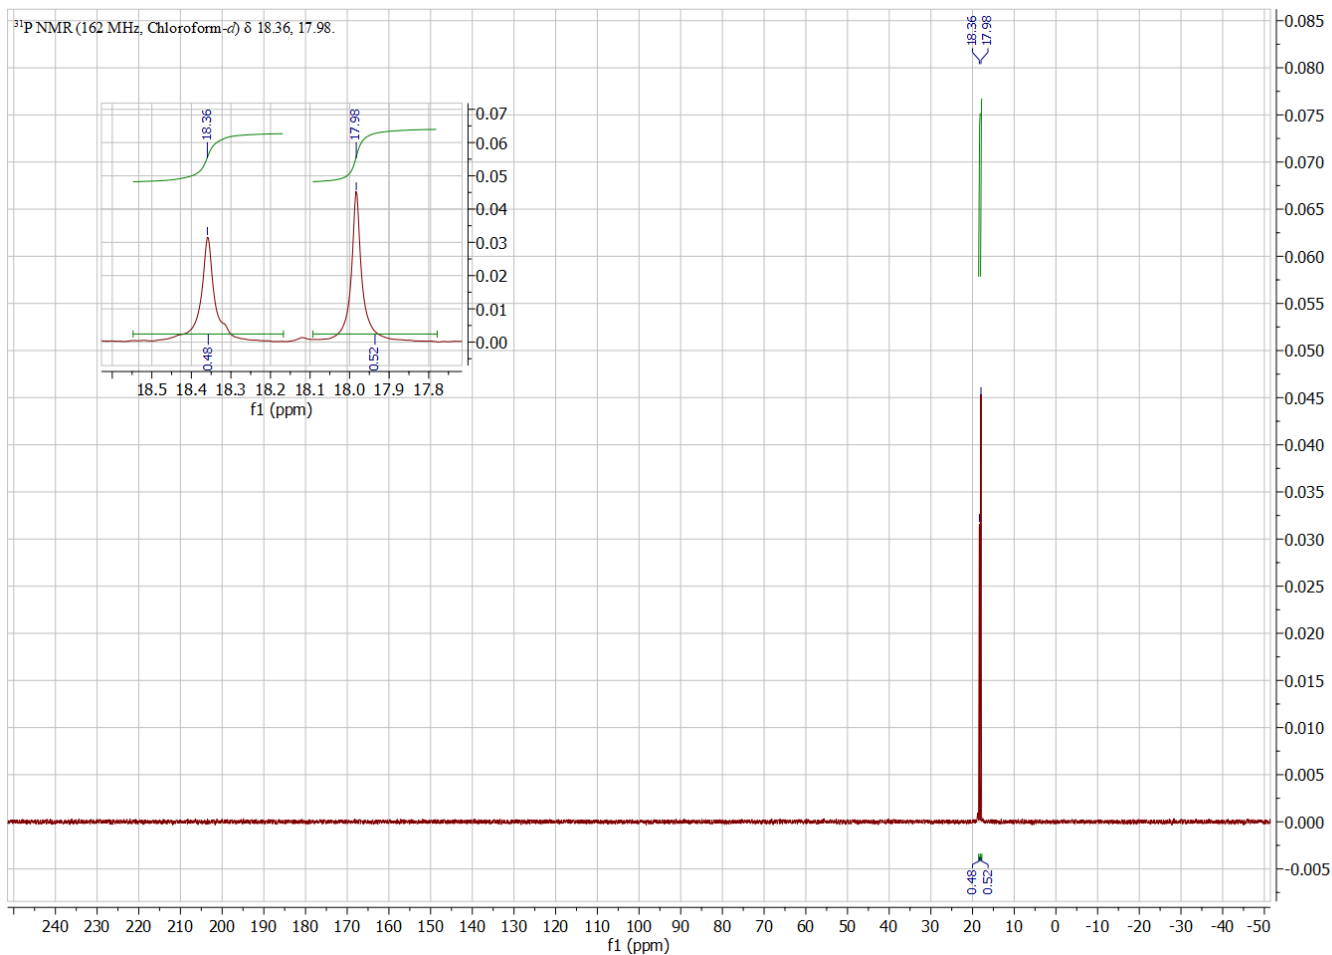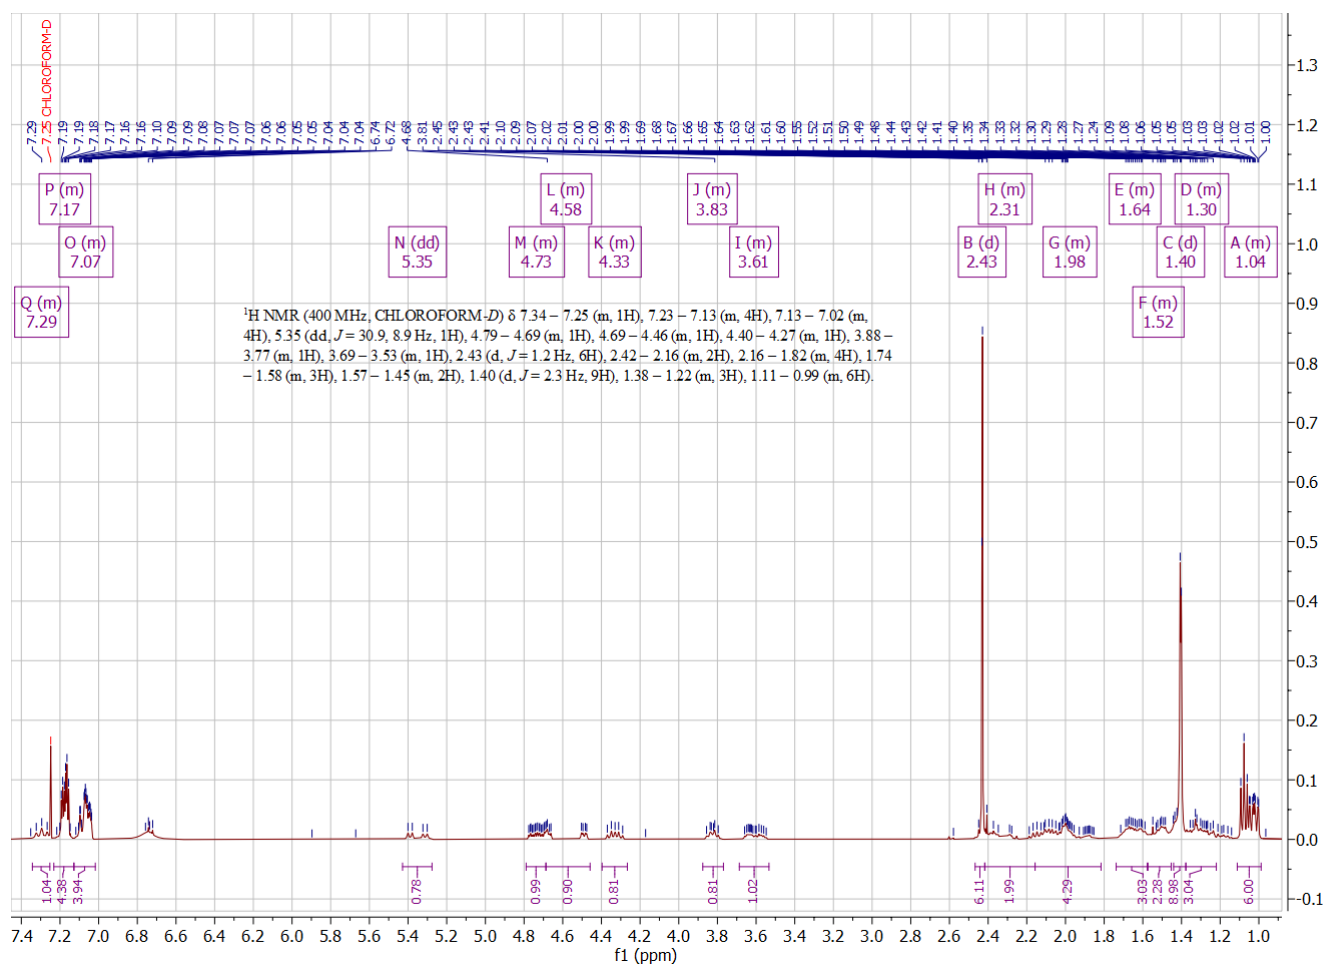

**(89) Boc-L-Phg-L-Pro-Val<sup>P</sup>(OPh-4-SCH<sub>3</sub>)<sub>2</sub>**

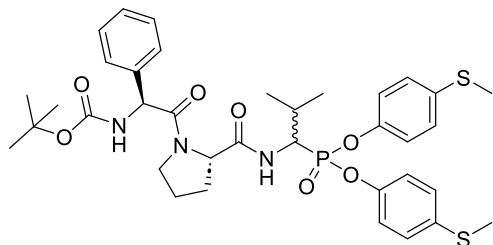

**Name:** *tert*-butyl ((1*S*)-2-((2*S*)-2-((1-(bis(4-(methylthio)phenoxy)phosphoryl)-2-methylpropyl)carbamoyl)pyrrolidin-1-yl)-2-oxo-1-phenylethyl)carbamate

**<sup>31</sup>P NMR** (162 MHz, Chloroform-*d*) δ 18.39 (d, *J* = 4.2 Hz, 45%), 18.21 (s, 19%), 17.98 (s, 36%).

**<sup>1</sup>H NMR** (400 MHz, Chloroform-*d*) δ 7.62 – 7.25 (m, 5H, 4xArH, NH), 7.22 – 7.11 (m, 6H, 6xArH), 7.11 – 6.96 (m, 3H, 3xArH), 5.92 – 5.72 (m, 1H, NH), 5.40 (dd, *J* = 31.5, 7.2 Hz, 1H, CH), 4.78 – 4.51 (m, 2H, CHP, CH), 3.76 – 3.53 (m, 1H, 0.5xCH<sub>2</sub>), 3.34 – 3.01 (m, 1H, 0.5xCH<sub>2</sub>), 2.46 – 2.40 (m, 6H, 2xSCH<sub>3</sub>), 2.40 – 2.13 (m, 2H, 0.5xCH<sub>2</sub> CH), 2.03 – 1.62 (m, 3H, 1.5xCH<sub>2</sub>), 1.45 – 1.31 (m, 9H, Boc), 1.13 – 0.85 (m, 6H, 2xCH<sub>3</sub>).

**HRMS:** C<sub>36</sub>H<sub>46</sub>N<sub>3</sub>O<sub>7</sub>PS<sub>2</sub> [M+Na]<sup>+</sup> calc. 750.2412 found 750.2407

**HPLC:** purity >99%; retention time 19.180 min

**Chromatogram**

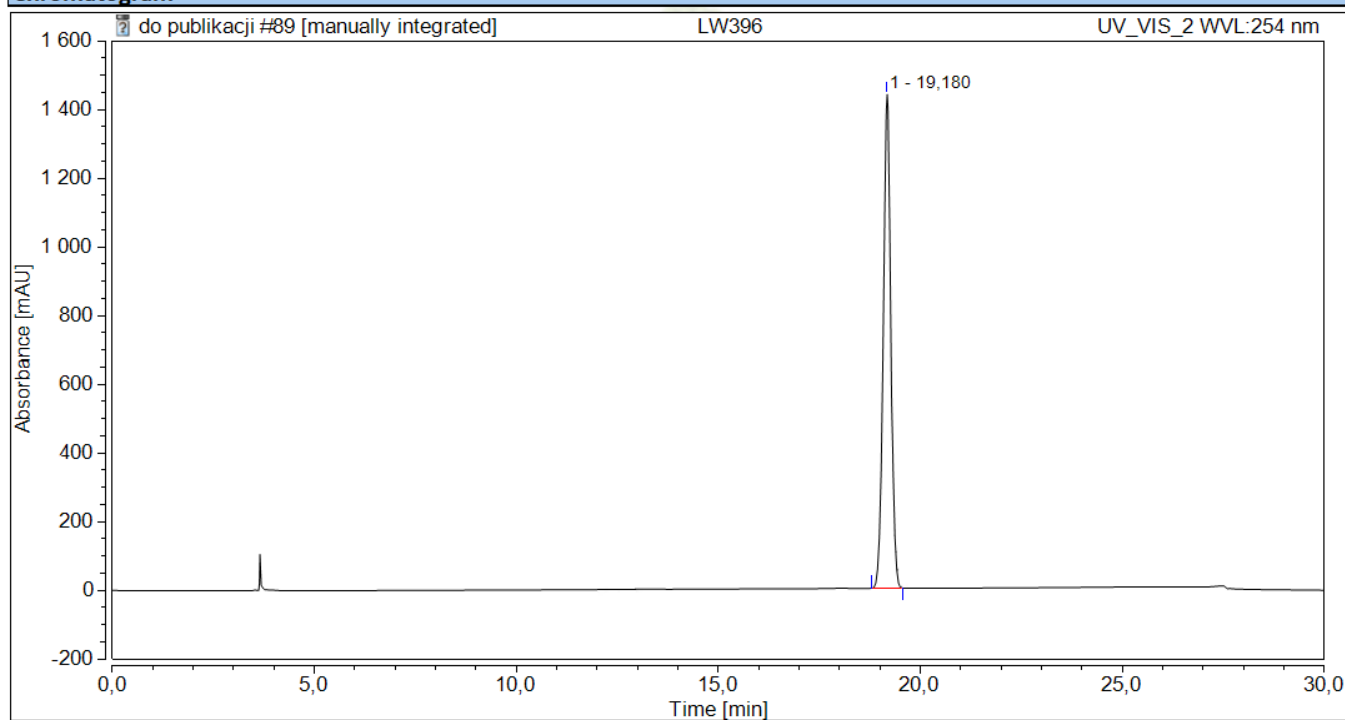

**Integration Results**

| No.           | Peak Name | Retention Time<br>min | Area<br>mAU*min | Height<br>mAU   | Relative Area<br>% | Relative Height<br>% | Amount<br>n.a. |
|---------------|-----------|-----------------------|-----------------|-----------------|--------------------|----------------------|----------------|
| 1             |           | 19,180                | 334,417         | 1437,657        | 100,00             | 100,00               | n.a.           |
| <b>Total:</b> |           |                       | <b>334,417</b>  | <b>1437,657</b> | <b>100,00</b>      | <b>100,00</b>        |                |

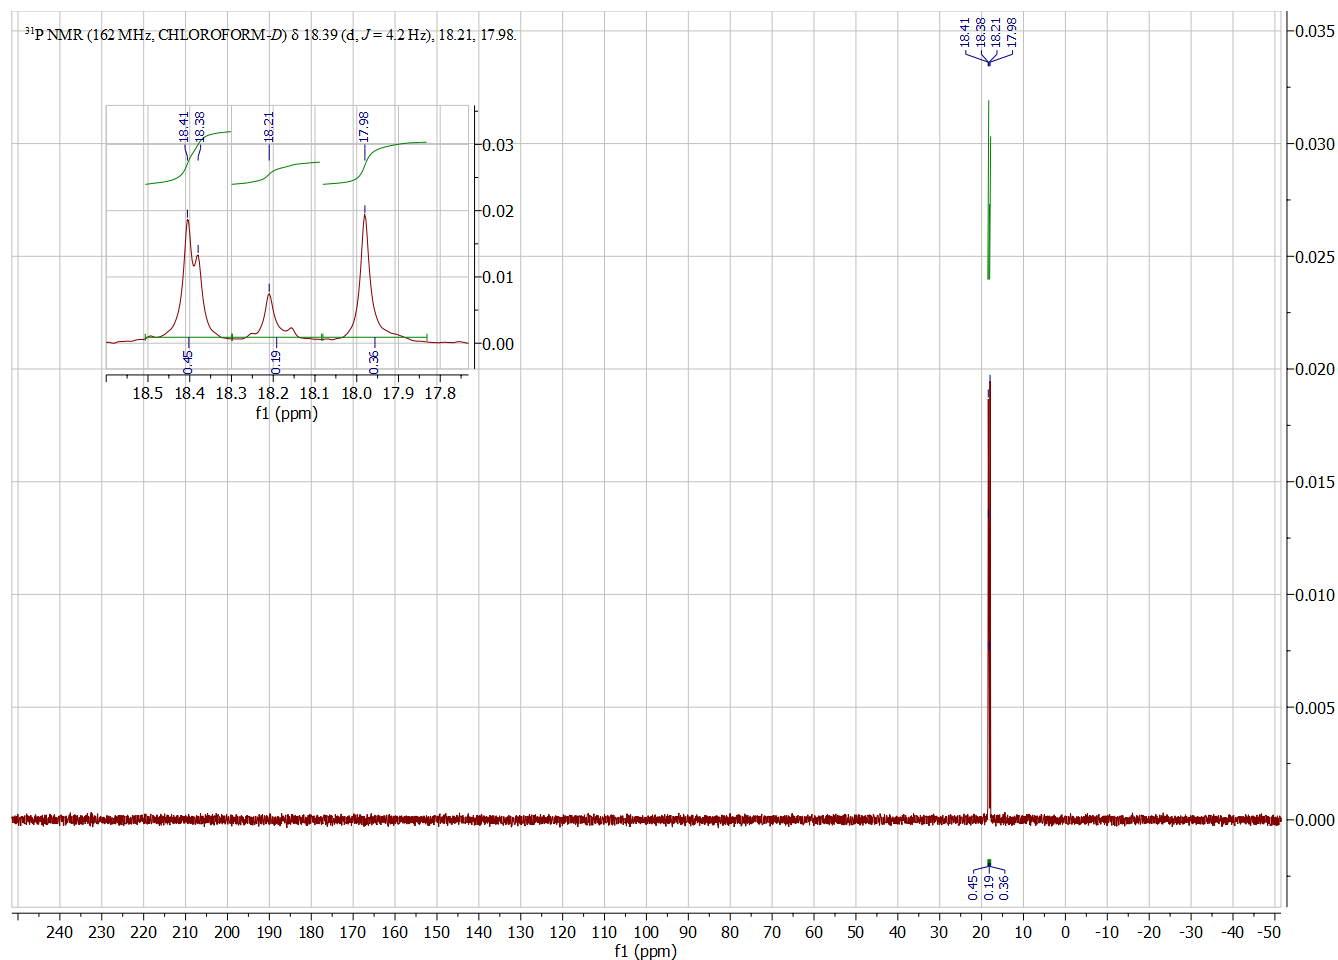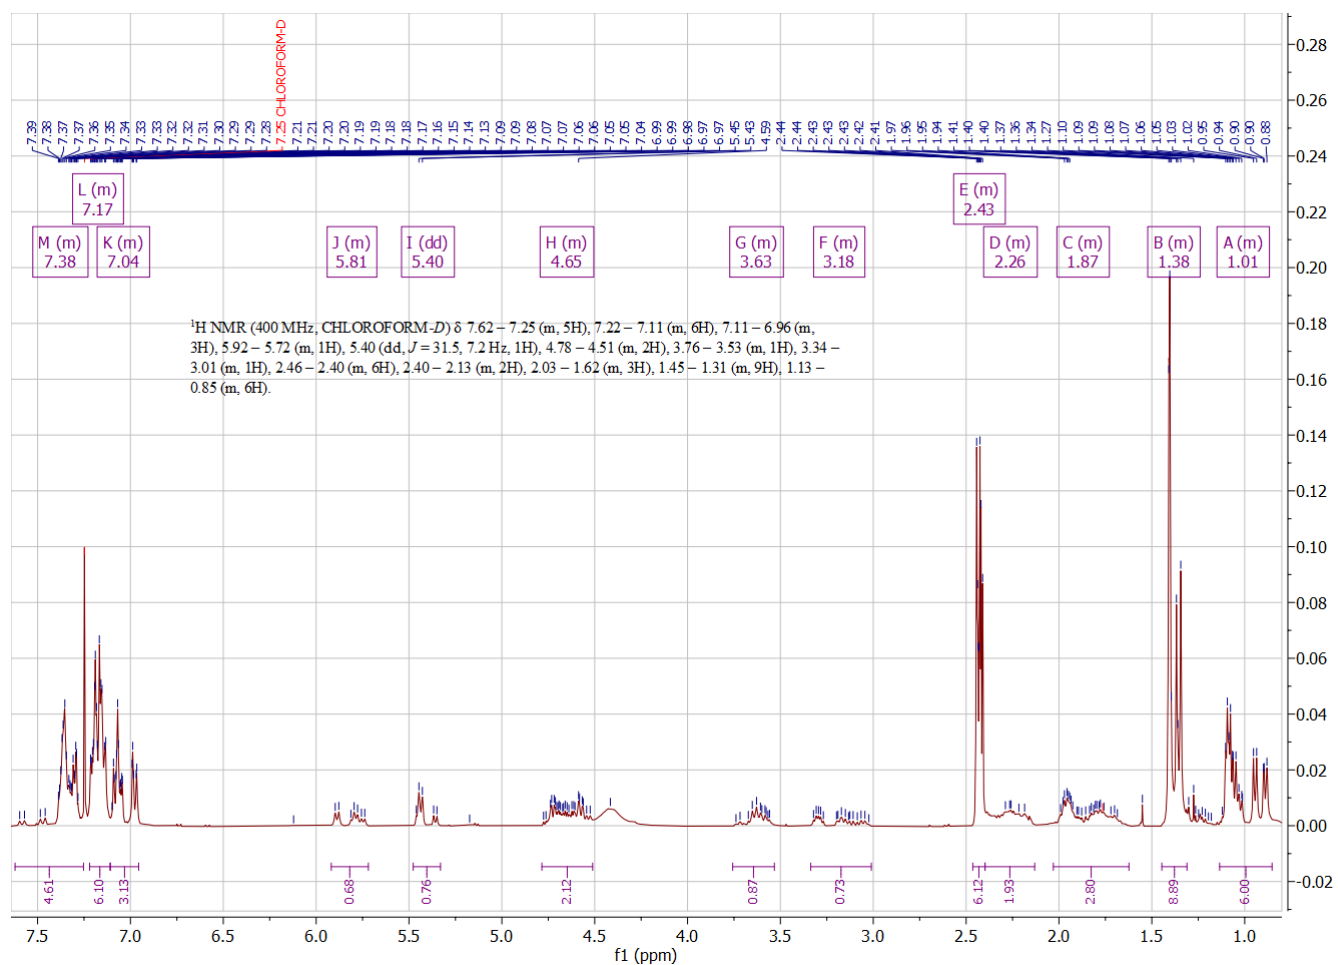

**(90) Boc-D-Phg-L-Pro- Val<sup>P</sup>(OPh-4-SCH<sub>3</sub>)<sub>2</sub>**

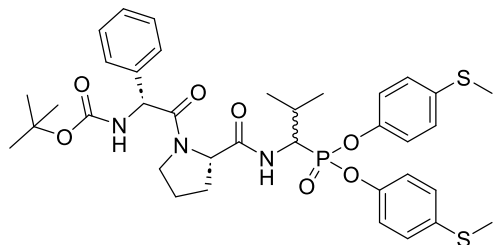

**Name:** *tert*-butyl ((1*R*)-2-((2*S*)-2-((1-(bis(4-(methylthio)phenoxy)phosphoryl)-2-methylpropyl)carbamoyl)pyrrolidin-1-yl)-2-oxo-1-phenylethyl)carbamate

<sup>31</sup>P NMR (162 MHz, Chloroform-*d*) δ 18.46(s, 61%), 18.28 (s, 39%).

<sup>1</sup>H NMR (400 MHz, Chloroform-*d*) δ 7.65 – 7.42 (m, 1H, NH), 7.42 – 7.27 (m, 5H, 5xArH), 7.22 – 7.14 (m, 6H, 6xArH), 7.13 – 7.03 (m, 2H, 2xArH), 5.77 (dd, *J* = 18.9, 7.6 Hz, 1H, NH), 5.40 (dd, *J* = 37.6, 7.5 Hz, 1H, CH), 4.79 – 4.64 (m, 1H, CHP), 4.64 – 4.50 (m, 1H, CH), 3.77 – 3.53 (m, 1H, 0.5xCH<sub>2</sub>), 3.23 – 2.95 (m, 1H, 0.5xCH<sub>2</sub>), 2.49 – 2.42 (m, 6H, 2xSCH<sub>3</sub>), 2.42 – 1.86 (m, 3H, CH<sub>2</sub>, CH), 1.86 – 1.59 (m, 2H, CH<sub>2</sub>), 1.41 – 1.30 (m, 9H, Boc), 1.13 – 0.91 (m, 6H, 2xCH<sub>3</sub>).

**HRMS:** C<sub>36</sub>H<sub>46</sub>N<sub>3</sub>O<sub>7</sub>PS<sub>2</sub> [M+Na]<sup>+</sup> calc. 750.2412 found 750.2410

**HPLC:** purity >99%; retention time 19.143 and 19.380 min

**Chromatogram**

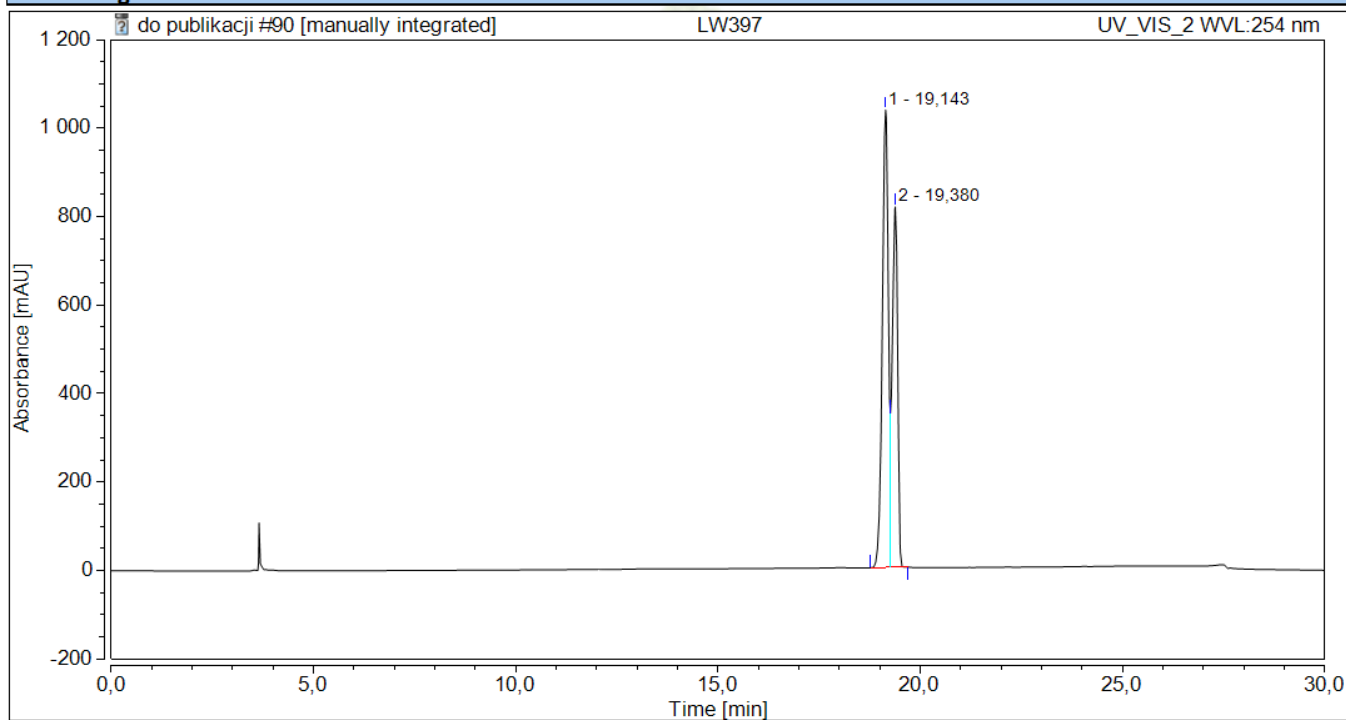

**Integration Results**

| No.           | Peak Name | Retention Time<br>min | Area<br>mAU*min | Height<br>mAU   | Relative Area<br>% | Relative Height<br>% | Amount |
|---------------|-----------|-----------------------|-----------------|-----------------|--------------------|----------------------|--------|
| 1             |           | 19,143                | 177,972         | 1034,360        | 58,38              | 55,93                | n.a.   |
| 2             |           | 19,380                | 126,870         | 814,931         | 41,62              | 44,07                | n.a.   |
| <b>Total:</b> |           |                       | <b>304,843</b>  | <b>1849,291</b> | <b>100,00</b>      | <b>100,00</b>        |        |

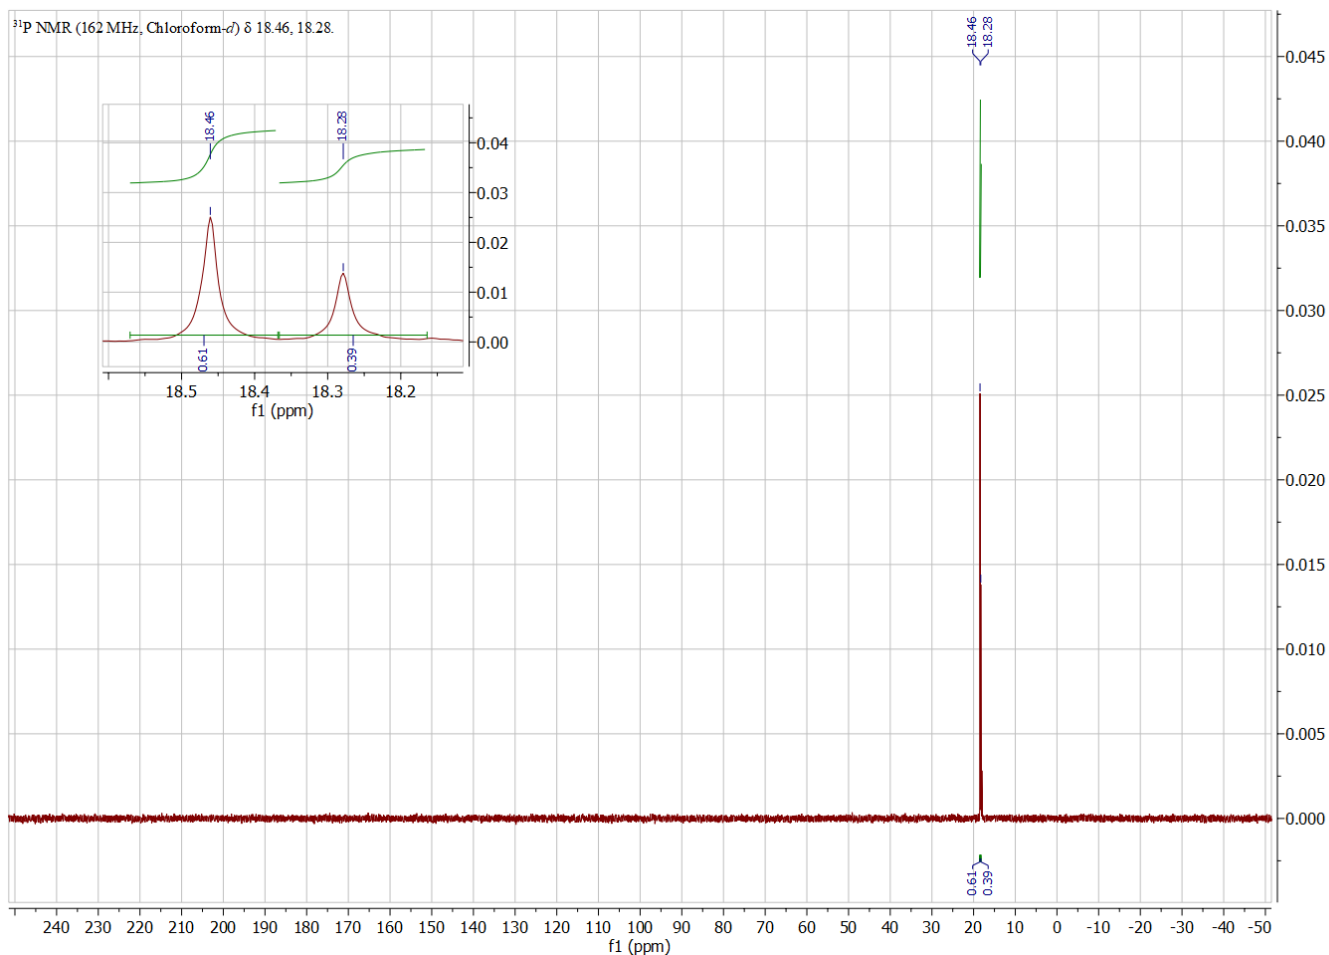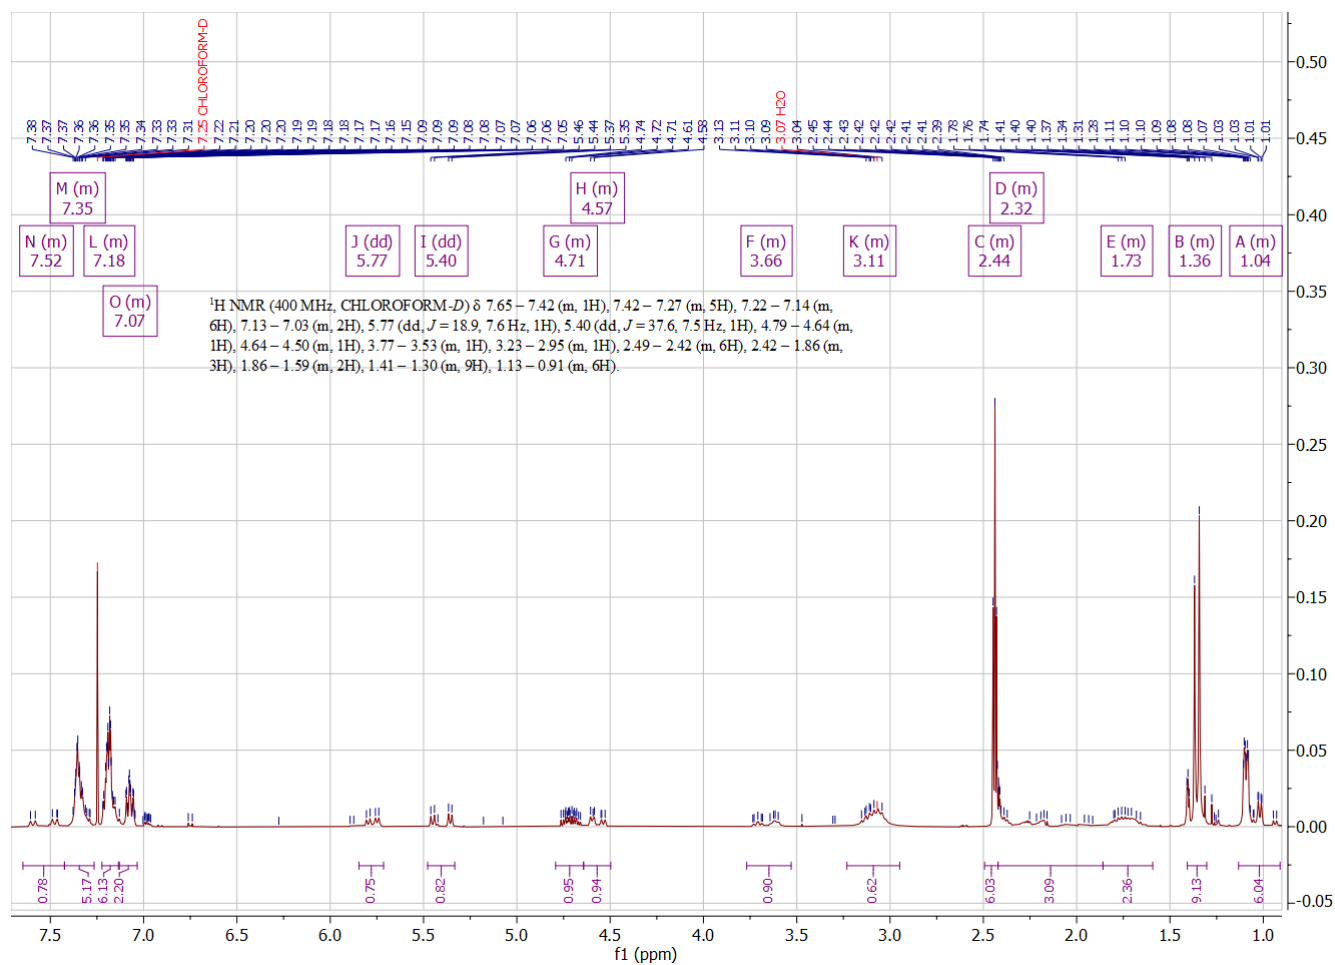

**(91) Boc-L-Chg-L-Pro-Val<sup>P</sup>(OPh-4-SCH<sub>3</sub>)<sub>2</sub>**

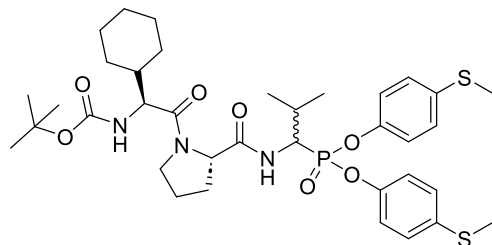

**Name:** *tert*-butyl ((1*S*)-2-((2*S*)-2-((1-(bis(4-(methylthio)phenoxy)phosphoryl)-2-methylpropyl)carbamoyl)pyrrolidin-1-yl)-1-cyclohexyl-2-oxoethyl)carbamate

<sup>31</sup>P NMR (162 MHz, Chloroform-*d*) δ 18.39 (s, 46%), 17.90 (s, 54%).

<sup>1</sup>H NMR (400 MHz, Chloroform-*d*) δ 7.35 (dd, *J* = 35.8, 10.1 Hz, 1H, NH), 7.23 – 7.02 (m, 8H, 8xArH), 5.35 (dd, *J* = 19.6, 9.2 Hz, 1H, NH), 4.79 – 4.68 (m, 1H, CHP), 4.68 – 4.47 (m, 1H, CH), 4.30 – 4.21 (m, 1H, CH), 3.86 – 3.74 (m, 1H, 0.5xCH<sub>2</sub>), 3.67 – 3.55 (m, 1H, 0.5xCH<sub>2</sub>), 2.47 – 2.42 (m, 6H, 2xSCH<sub>3</sub>), 2.42 – 2.30 (m, 1H, CH), 2.30 – 1.98 (m, 3H, CH<sub>2</sub>, CH), 1.98 – 1.47 (m, 7H, 3.5xCH<sub>2</sub>), 1.41 (s, 9H, Boc), 1.26 – 0.86 (m, 11H, 2xCH<sub>3</sub>, 2.5xCH<sub>2</sub>).

**HRMS:** C<sub>36</sub>H<sub>52</sub>N<sub>3</sub>O<sub>7</sub>PS<sub>2</sub> [M+Na]<sup>+</sup> calc. 756.2882 found 756.2870

**HPLC:** purity >99%; retention time 20.460 min

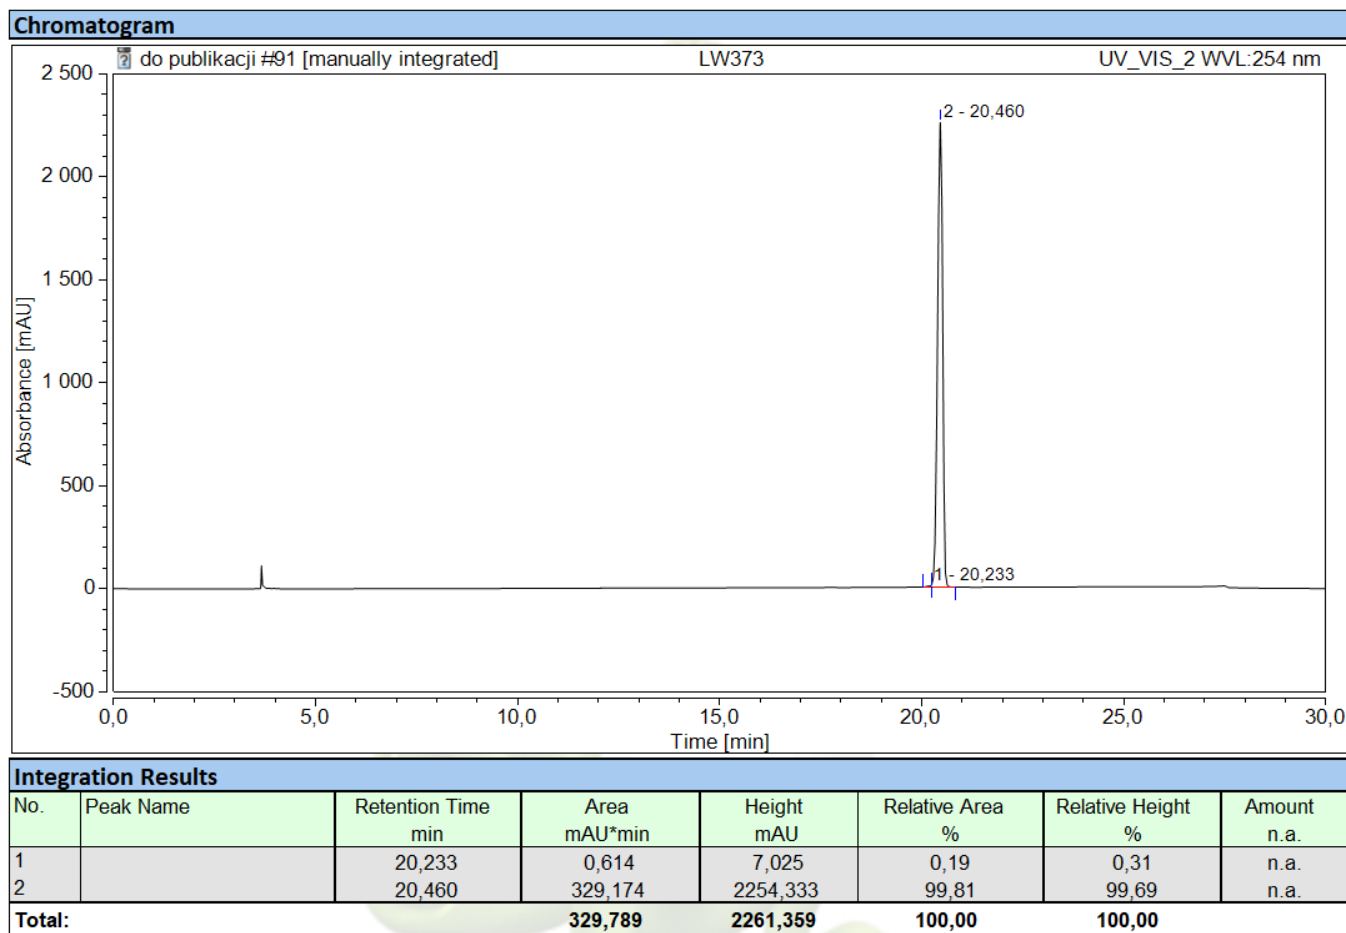



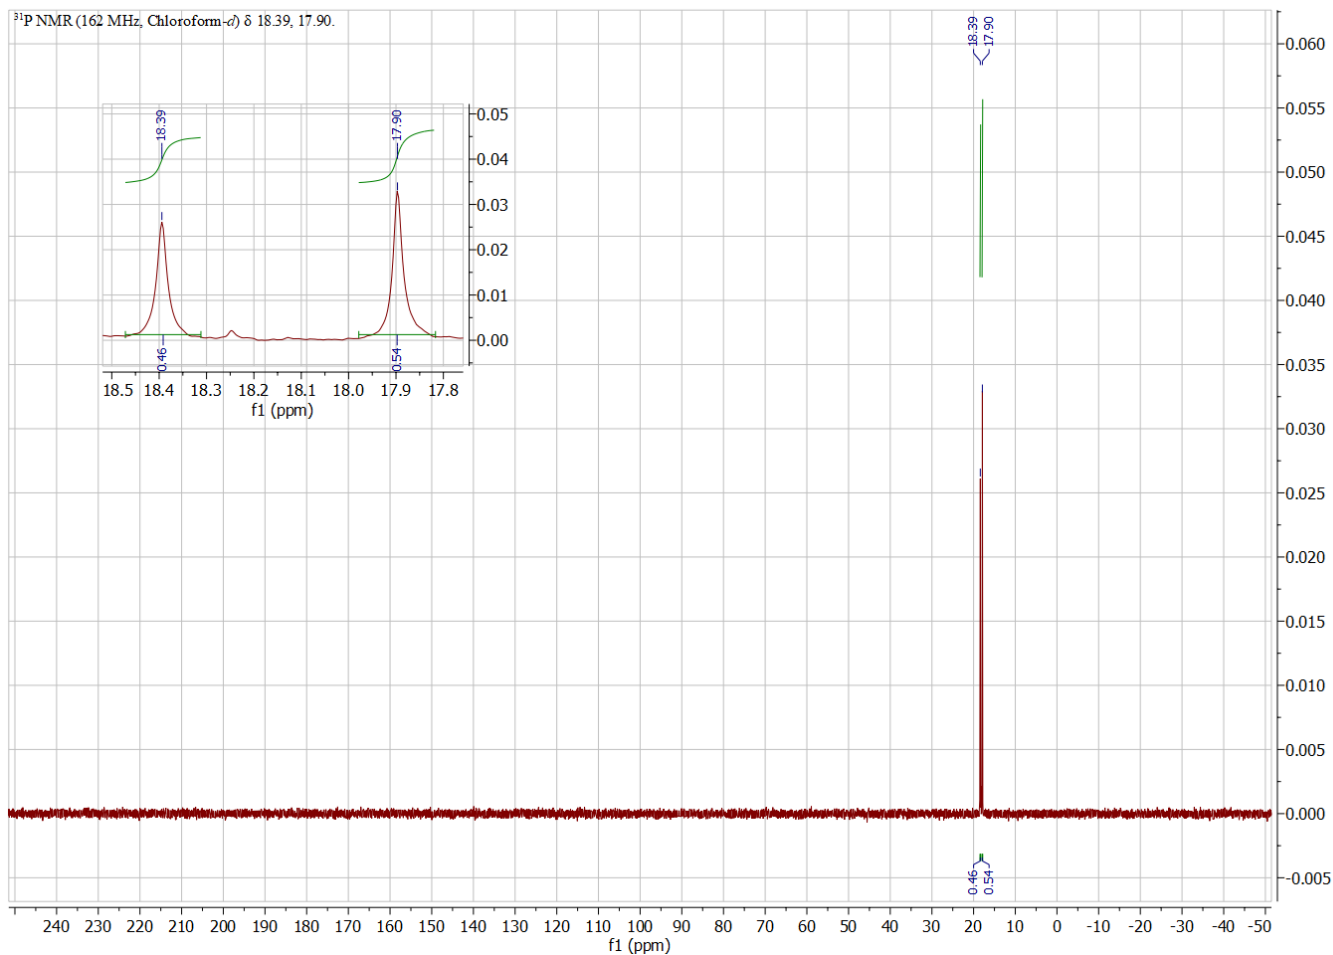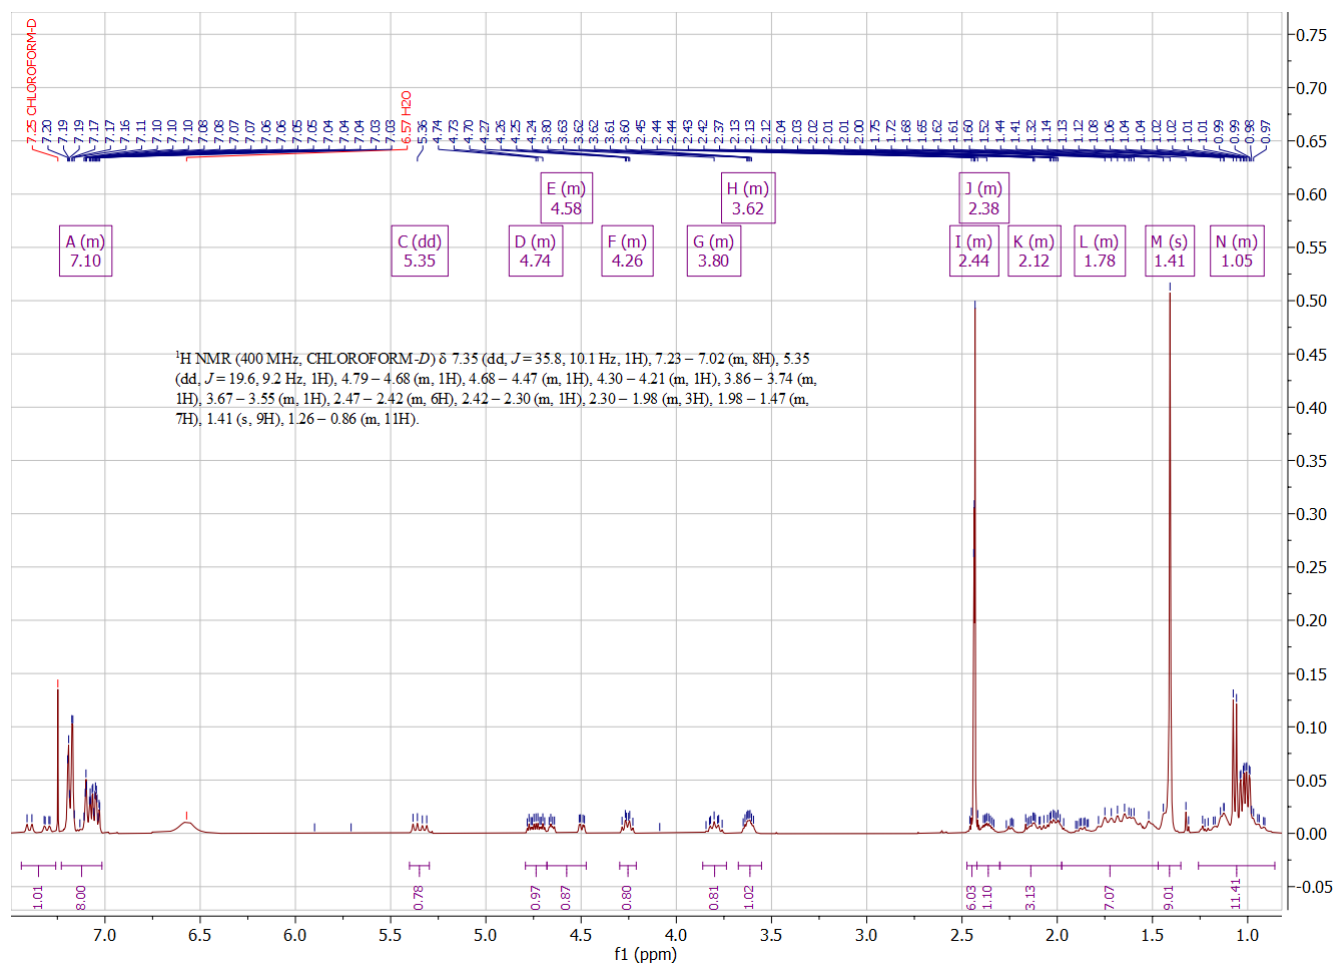

**(92) Boc-D-Chg-L-Pro-Val<sup>P</sup>(OPh-4-SCH<sub>3</sub>)<sub>2</sub>**

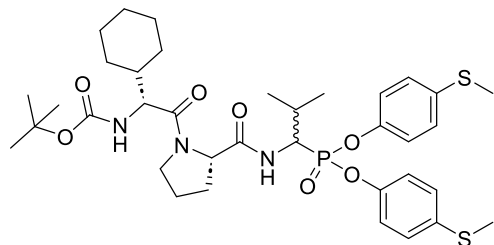

**Name:** *tert*-butyl ((1*R*)-2-((2*S*)-2-((1-(bis(4-(methylthio)phenoxy)phosphoryl)-2-methylpropyl)carbamoyl)pyrrolidin-1-yl)-1-cyclohexyl-2-oxoethyl)carbamate

<sup>31</sup>P NMR (162 MHz, Chloroform-*d*) δ 18.19 (s, 55%), 18.04 (s, 45%).

<sup>1</sup>H NMR (400 MHz, Chloroform-*d*) δ 7.54 (dd, *J* = 112.7, 10.2 Hz, 1H, NH), 7.23 – 7.15 (m, 4H, 4xArH), 7.14 – 6.96 (m, 4H, 4xArH), 5.37 – 5.25 (m, 1H, NH), 4.77 – 4.64 (m, 1H, CHP), 4.59 (dd, *J* = 26.1, 8.1 Hz, 1H, CH), 4.34 – 4.17 (m, 1H, CH), 3.95 – 3.82 (m, 1H, 0.5xCH<sub>2</sub>), 3.62 – 3.46 (m, 1H, 0.5xCH<sub>2</sub>), 2.43 (d, *J* = 3.1 Hz, 6H, 2xSCH<sub>3</sub>), 2.40 – 2.24 (m, 1H, CH), 2.24 – 1.94 (m, 2H, 0.5xCH<sub>2</sub>, CH), 1.94 – 1.52 (m, 8H, 4xCH<sub>2</sub>), 1.46 – 1.30 (m, 9H, Boc), 1.29 – 0.93 (m, 11H, 2xCH<sub>3</sub>, 2.5xCH<sub>2</sub>).

**HRMS:** C<sub>36</sub>H<sub>52</sub>N<sub>3</sub>O<sub>7</sub>PS<sub>2</sub> [M+Na]<sup>+</sup> calc. 756.2882 found 756.2872

**HPLC:** purity >99%; retention time 20.387 min

**Chromatogram**

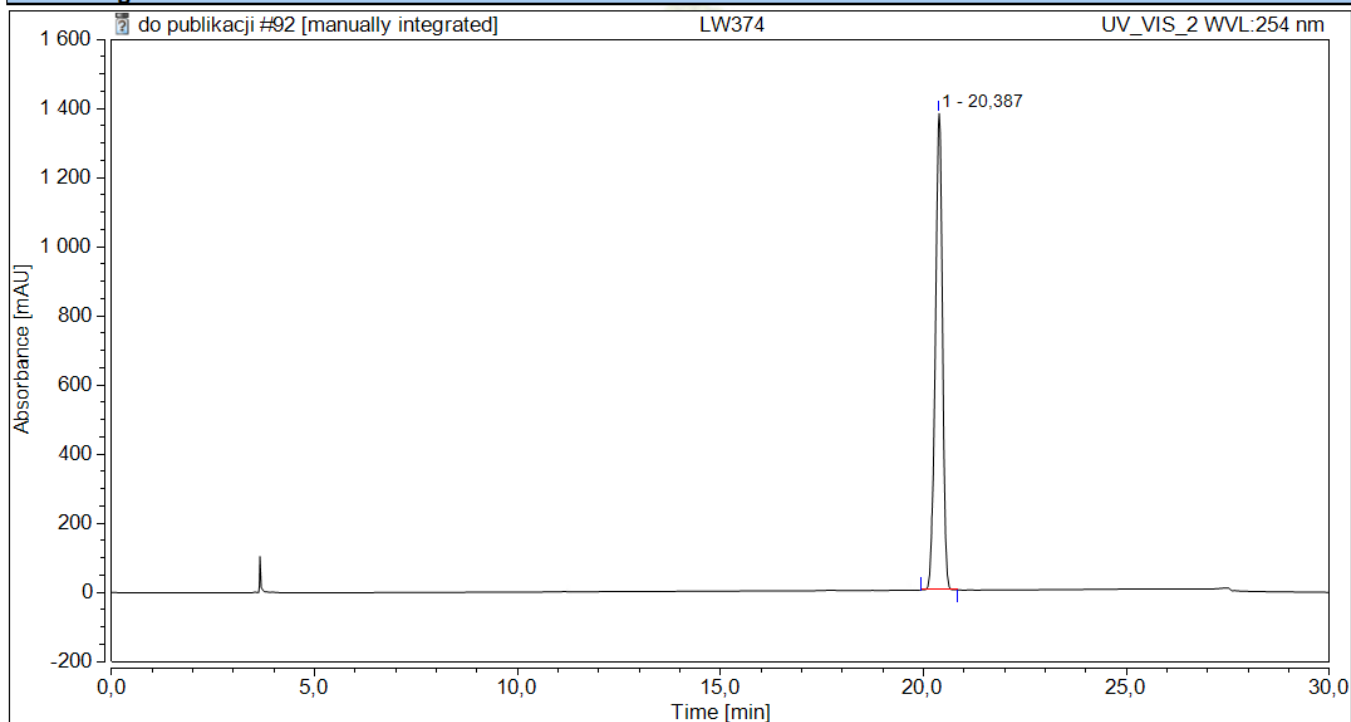

**Integration Results**

| No.           | Peak Name | Retention Time<br>min | Area<br>mAU*min | Height<br>mAU   | Relative Area<br>% | Relative Height<br>% | Amount<br>n.a. |
|---------------|-----------|-----------------------|-----------------|-----------------|--------------------|----------------------|----------------|
| 1             |           | 20,387                | 280,330         | 1377,415        | 100,00             | 100,00               | n.a.           |
| <b>Total:</b> |           |                       | <b>280,330</b>  | <b>1377,415</b> | <b>100,00</b>      | <b>100,00</b>        |                |

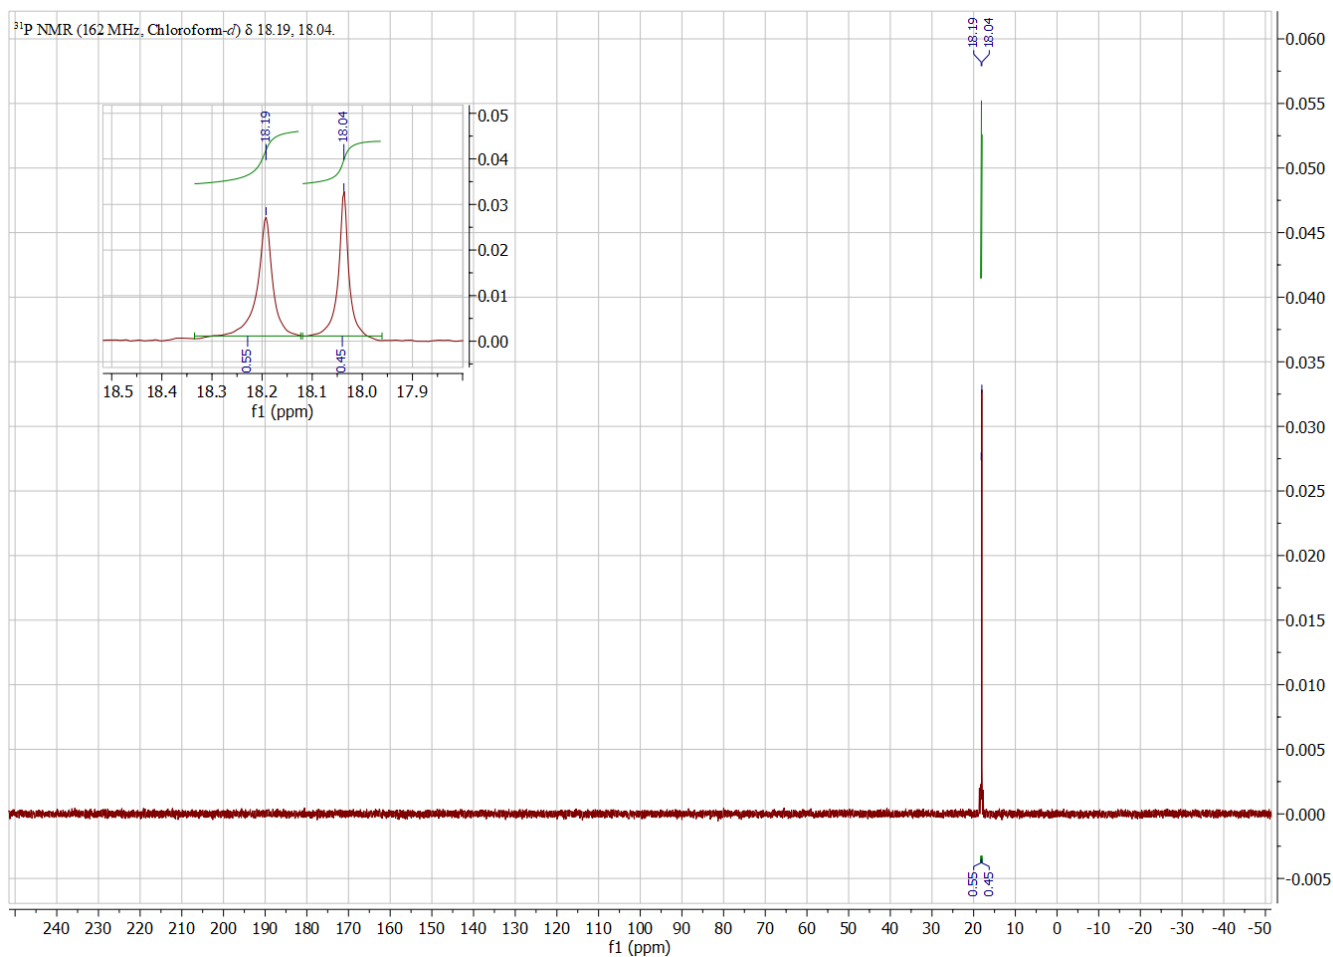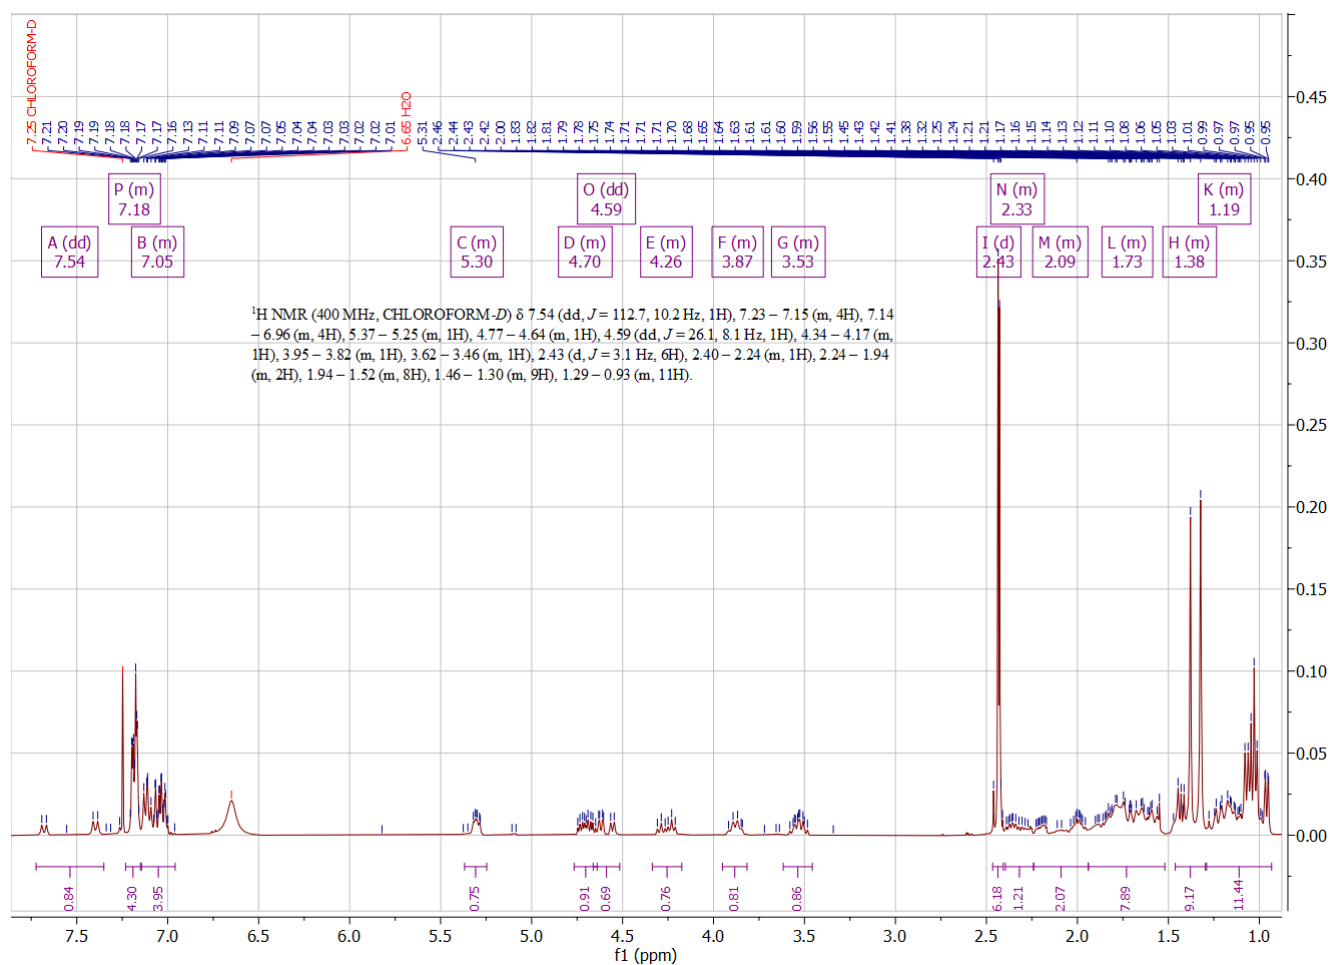

**(93) Boc-L-Phe-L-Pro-Val<sup>P</sup>(OPh-4-SCH<sub>3</sub>)<sub>2</sub>**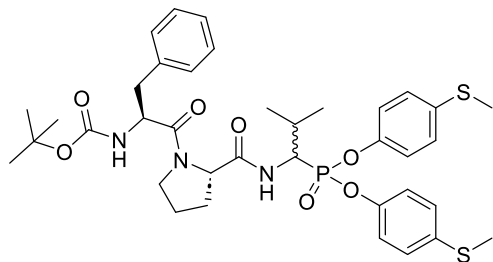

**Name:** *tert*-butyl ((2*S*)-1-((2*S*)-2-((1-(bis(4-(methylthio)phenoxy)phosphoryl)-2-methylpropyl)carbamoyl)pyrrolidin-1-yl)-1-oxo-3-phenylpropan-2-yl)carbamate

<sup>31</sup>P NMR (162 MHz, Chloroform-*d*) δ 18.43 (s, 44%), 18.02 (s, 56%).

<sup>1</sup>H NMR (400 MHz, Chloroform-*d*) δ 7.69 (dd, *J* = 51.4, 9.7 Hz, 1H, NH), 7.33 – 7.22 (m, 2H, 2xArH), 7.22 – 7.16 (m, 5H, 5xArH), 7.15 – 7.04 (m, 6H, 6xArH), 5.32 (dd, *J* = 57.6, 8.4 Hz, 1H, NH), 4.84 – 4.45 (m, 3H, CHP, 2xCH), 3.76 – 3.58 (m, 1H, 0.5xCH<sub>2</sub>), 3.48 – 3.17 (m, 1H, 0.5xCH<sub>2</sub>), 3.12 – 2.82 (m, 1H, 0.5xCH<sub>2</sub>), 2.82 – 2.56 (m, 1H, 0.5xCH<sub>2</sub>), 2.43 (d, *J* = 7.7 Hz, 6H, 2xSCH<sub>3</sub>), 2.40 – 2.32 (m, 2H, 0.5xCH<sub>2</sub>, CH), 2.11 – 1.82 (m, 3H, 1.5xCH<sub>2</sub>), 1.41 – 1.28 (m, 9H, Boc), 1.16 – 1.02 (m, 6H, 2xCH<sub>3</sub>).

**HRMS:** C<sub>37</sub>H<sub>48</sub>N<sub>3</sub>O<sub>7</sub>PS<sub>2</sub> [M+Na]<sup>+</sup> calc. 764.2569 found 764.2561

**HPLC:** purity >99%; retention time 19.247 and 19.457 min

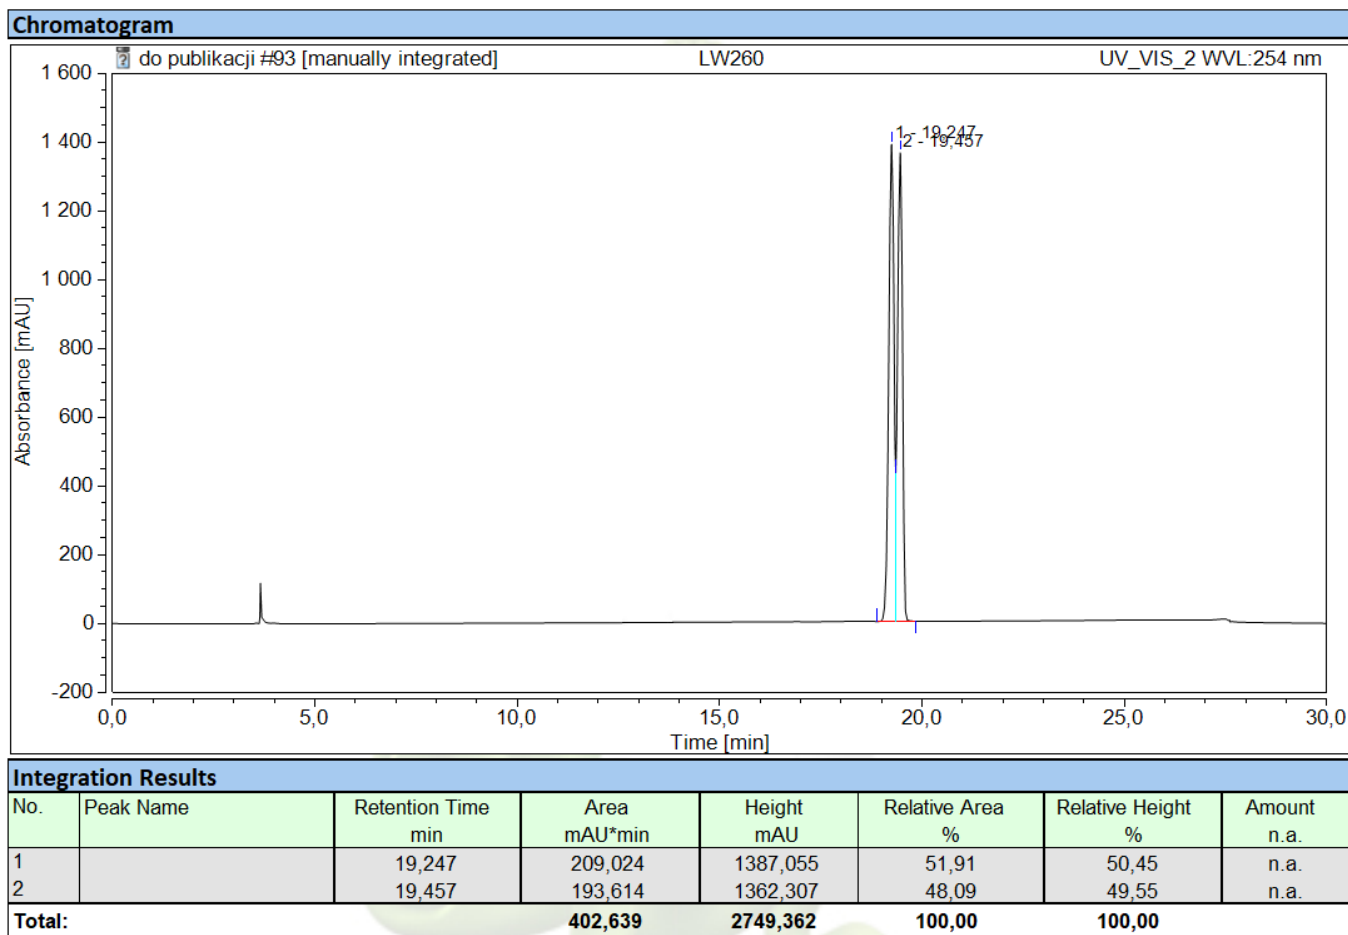

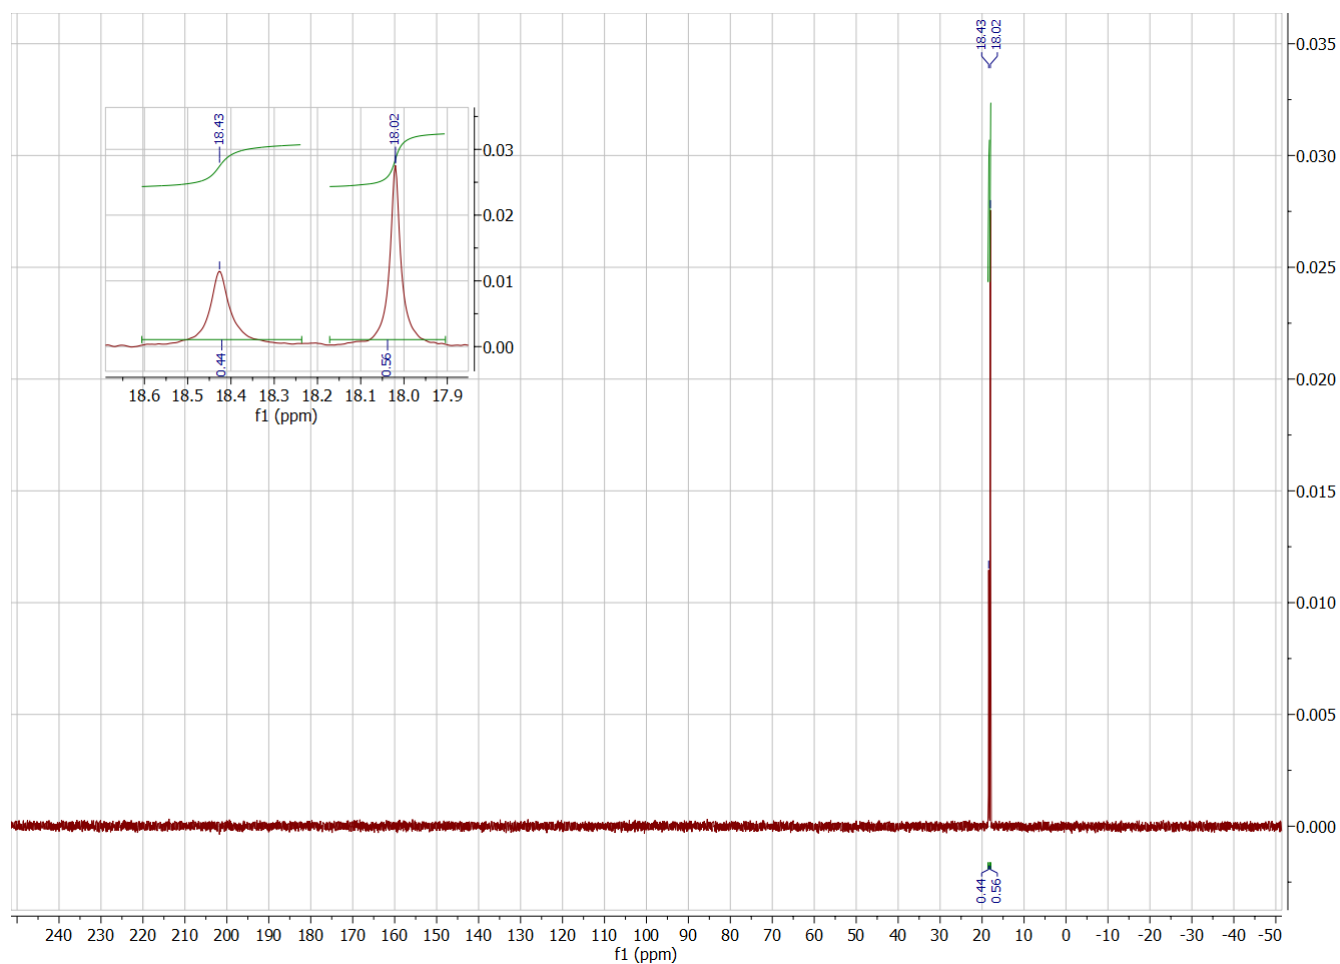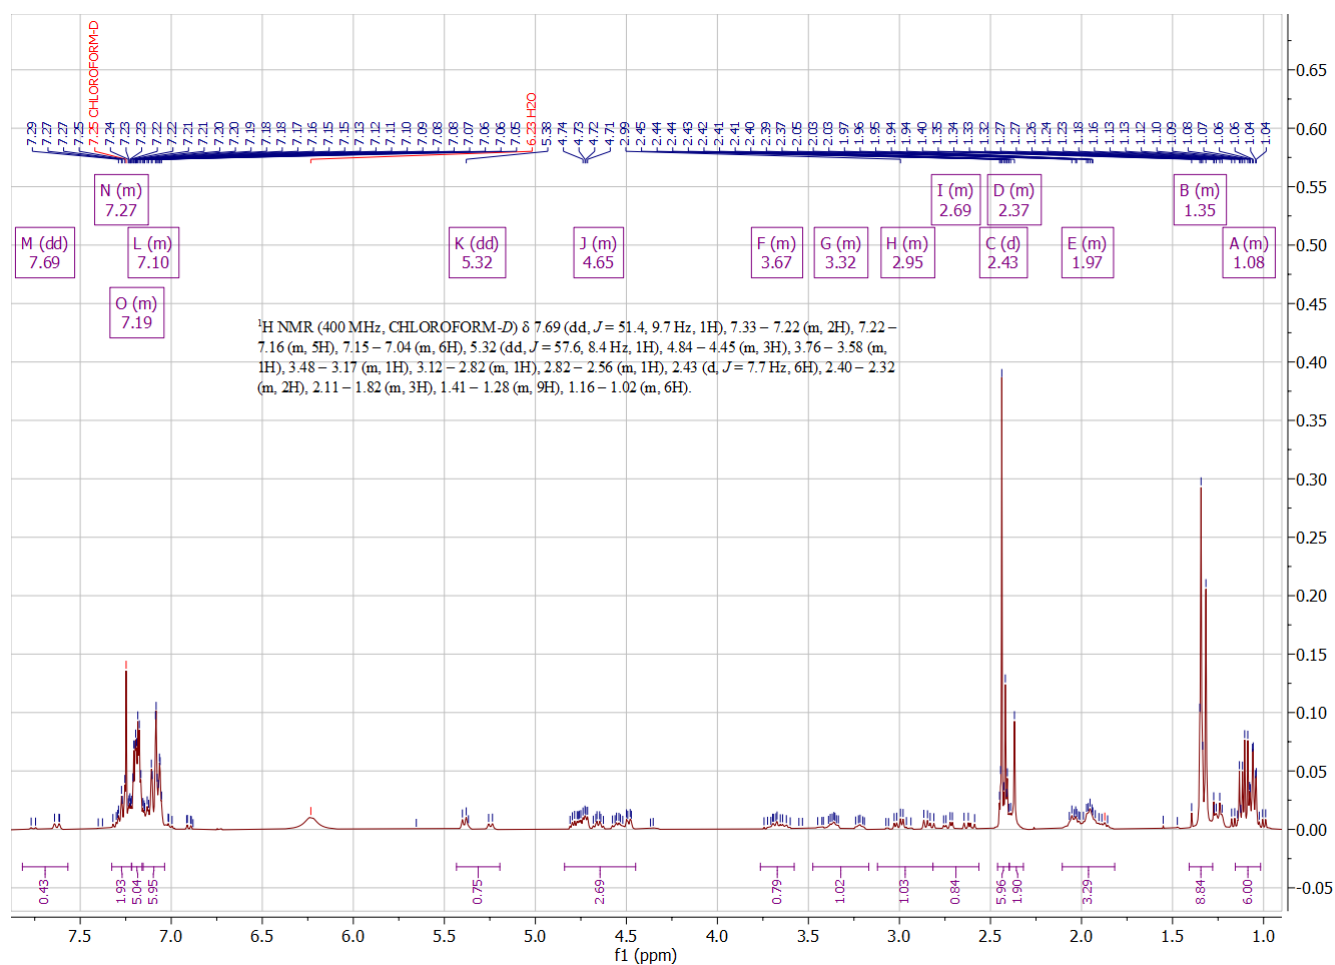

**(94) Boc-D-Phe-L-Pro- Val<sup>P</sup>(OPh-4-SCH<sub>3</sub>)<sub>2</sub>**

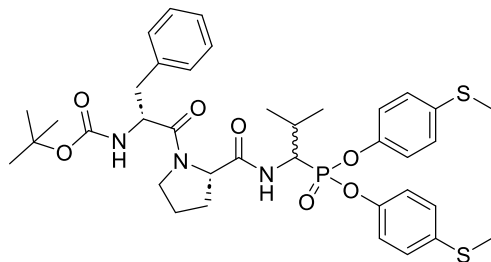

**Name:** *tert*-butyl ((2*R*)-1-((2*S*)-2-((1-(bis(4-(methylthio)phenoxy)phosphoryl)-2-methylpropyl)carbamoyl)pyrrolidin-1-yl)-1-oxo-3-phenylpropan-2-yl)carbamate

**<sup>31</sup>P NMR** (162 MHz, Chloroform-*d*) δ 18.38 (s, 56%), 18.17 (s, 44%).

**<sup>1</sup>H NMR** (400 MHz, Chloroform-*d*) δ 7.53 (dd, *J* = 109.7, 10.2 Hz, 1H, NH), 7.31 – 7.25 (m, 2H, 2xArH), 7.24 – 7.09 (m, 9H, 9xArH), 7.09 – 6.98 (m, 2H, 2xArH), 5.38 (d, *J* = 7.9 Hz, 1H, NH), 4.71 – 4.49 (m, 2H, CHP, CH), 4.49 – 4.31 (m, 1H, CH), 3.58 – 3.39 (m, 1H, 0.5xCH<sub>2</sub>), 3.05 – 2.90 (m, 2H, CH<sub>2</sub>), 2.62 – 2.47 (m, 1H, 0.5xCH<sub>2</sub>), 2.47 – 2.41 (m, 6H, 2xSCH<sub>3</sub>), 2.41 – 2.28 (m, 1H, CH), 2.20 – 2.00 (m, 1H, 0.5xCH<sub>2</sub>), 1.90 – 1.39 (m, 3H, 1.5xCH<sub>2</sub>), 1.35 (d, *J* = 17.6 Hz, 9H, Boc), 1.14 – 0.92 (m, 6H, 2xCH<sub>3</sub>).

**HRMS:** C<sub>37</sub>H<sub>48</sub>N<sub>3</sub>O<sub>7</sub>PS<sub>2</sub> [M+Na]<sup>+</sup> calc. 764.2569 found 764.2543

**HPLC:** purity >99%; retention time 19.477 min

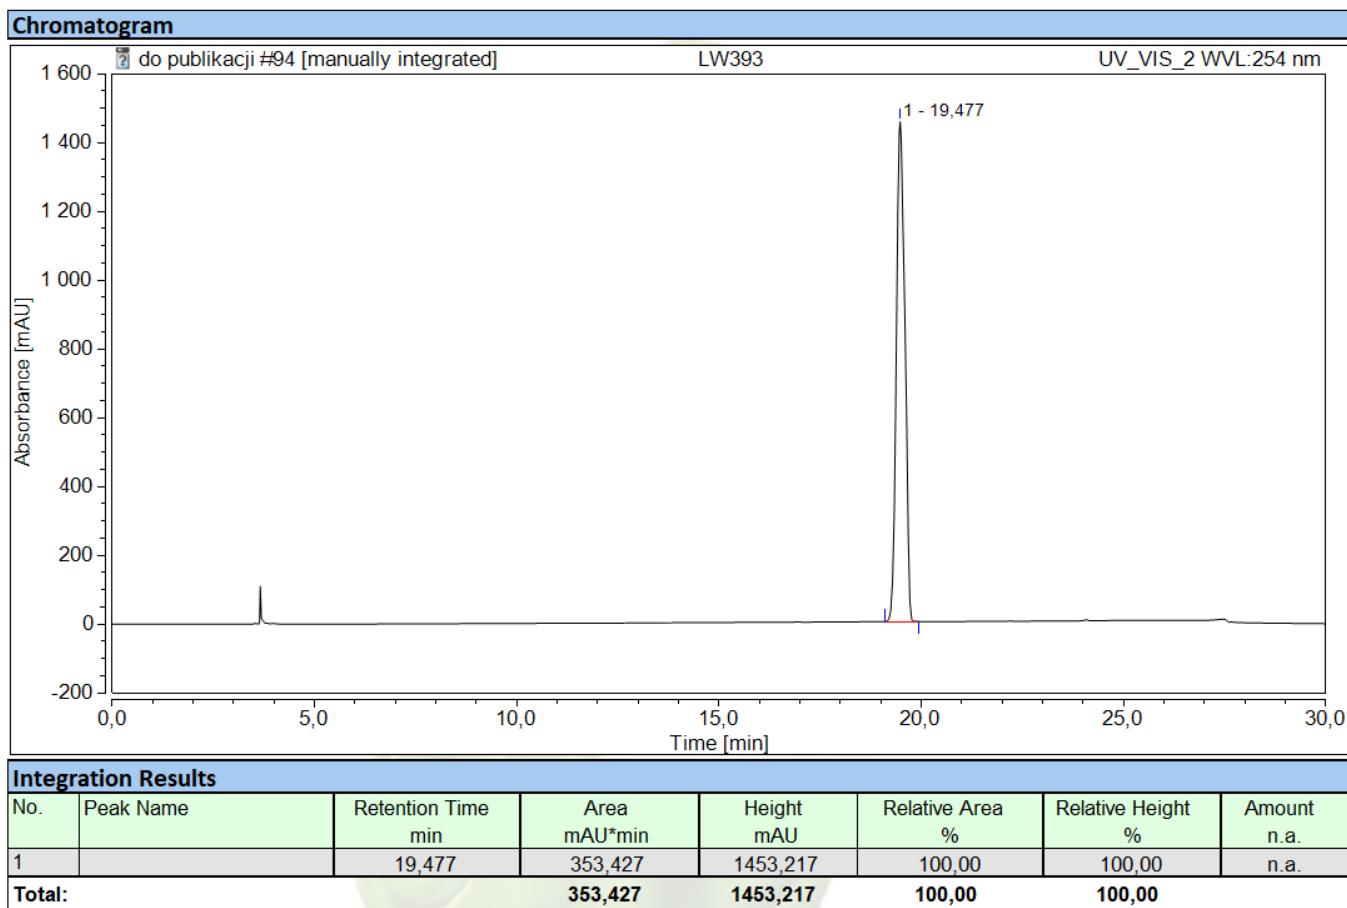

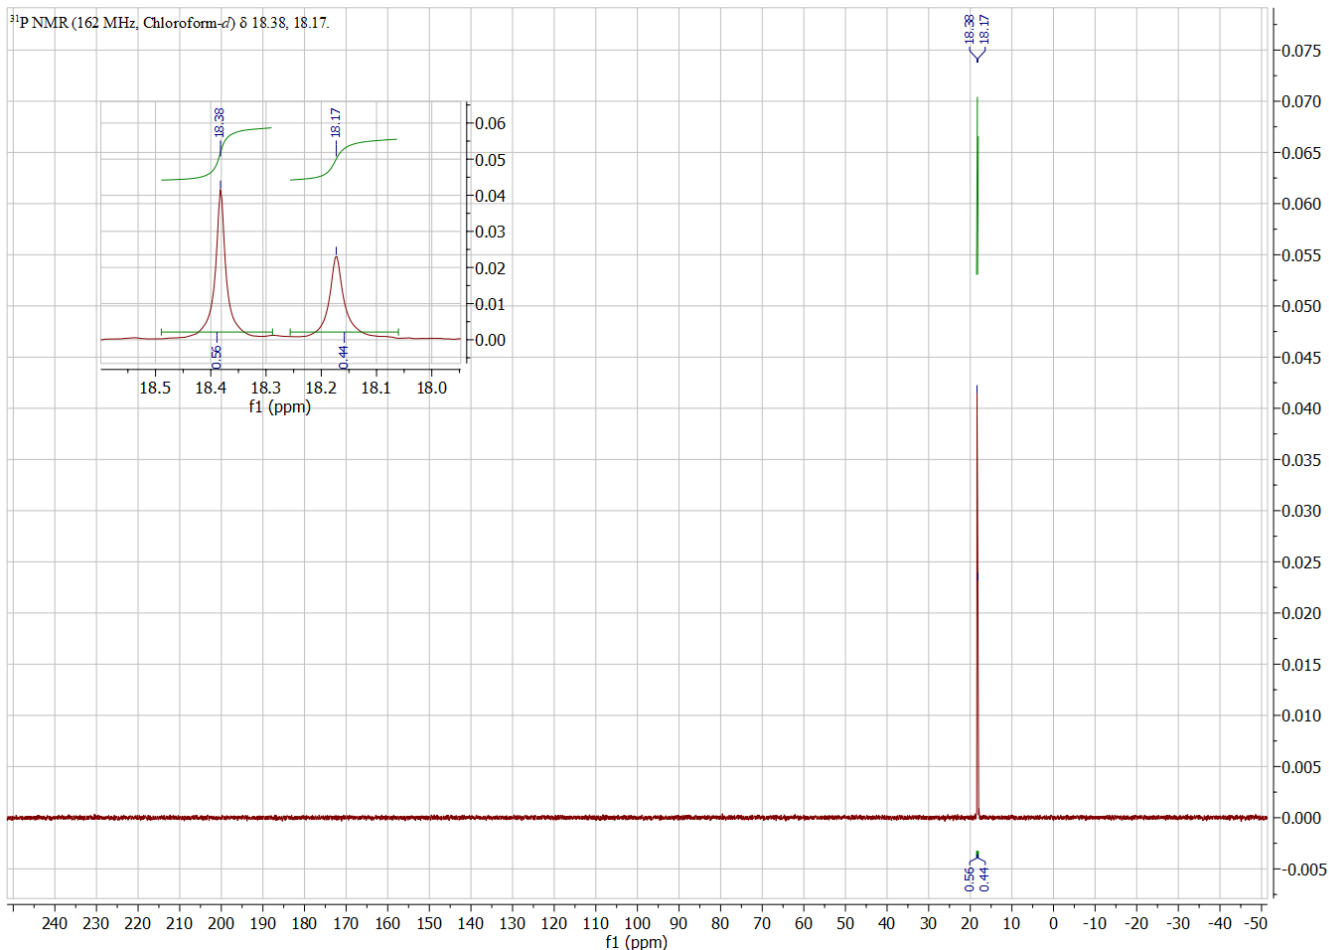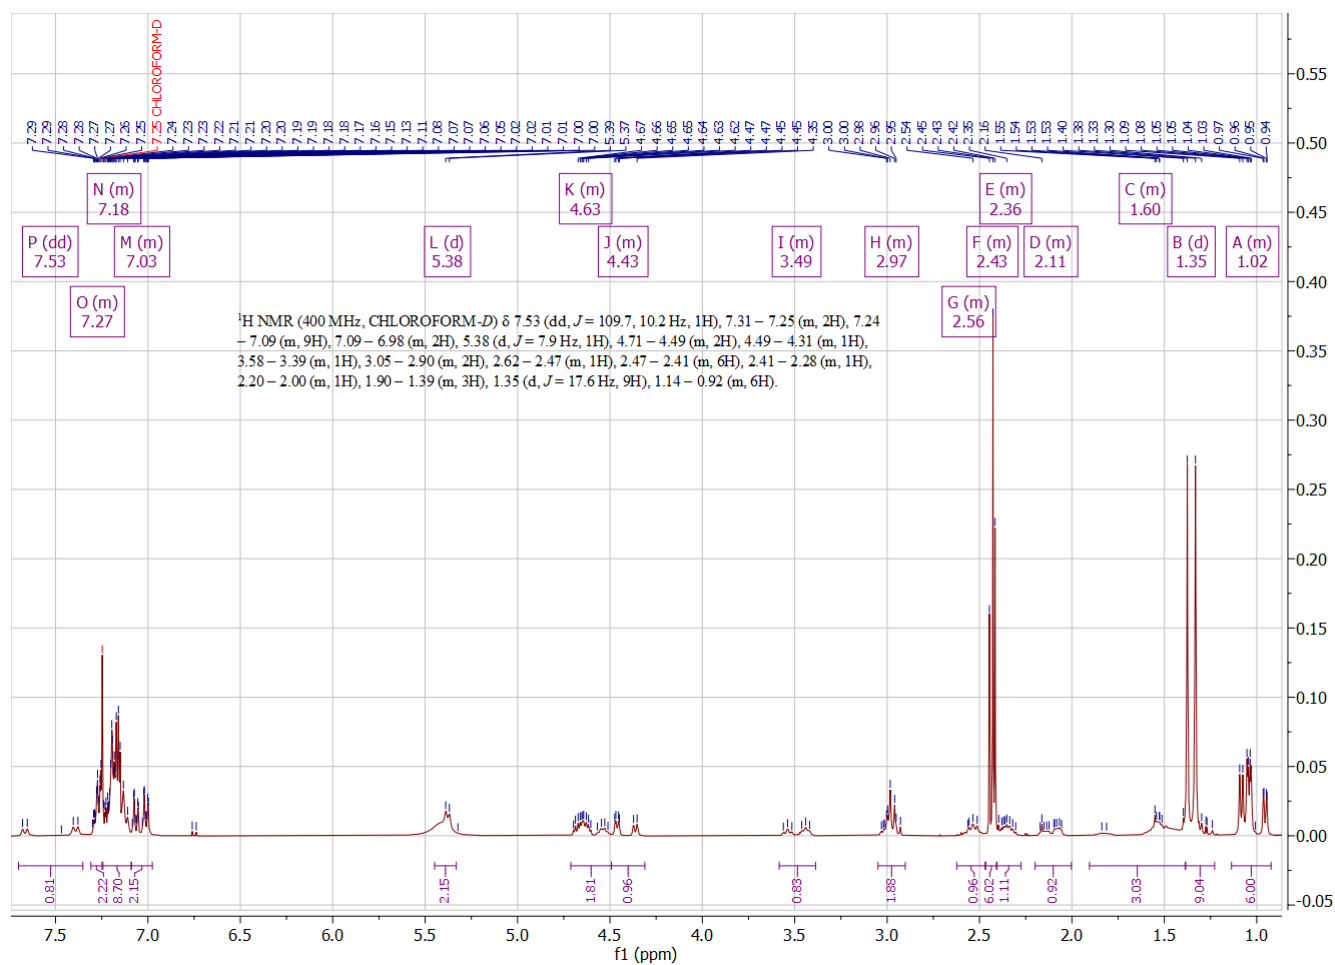

(95) Boc-L-Cha-L-Pro-Val<sup>P</sup>(OPh-4-SCH<sub>3</sub>)<sub>2</sub>

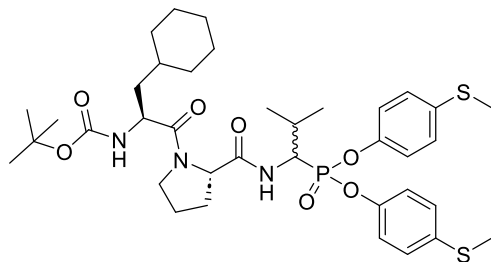

**Name:** *tert*-butyl ((2*S*)-1-((2*S*)-2-((1-(bis(4-(methylthio)phenoxy)phosphoryl)-2-methylpropyl)carbamoyl)pyrrolidin-1-yl)-3-cyclohexyl-1-oxopropan-2-yl)carbamate

<sup>31</sup>P NMR (162 MHz, Chloroform-*d*) δ 18.34 (s, 49%), 17.96 (s, 51%).

<sup>1</sup>H NMR (400 MHz, Chloroform-*d*) δ 7.40 (dd, *J* = 34.9, 10.8 Hz, 1H, NH), 7.22 – 7.15 (m, 4H, 4xArH), 7.15 – 6.99 (m, 4H, 4xArH), 5.23 (dd, *J* = 45.7, 8.8 Hz, 1H, NH), 4.78 – 4.36 (m, 3H, CHP, 2xCH), 3.78 – 3.63 (m, 1H, 0.5xCH<sub>2</sub>), 3.58 – 3.41 (m, 1H, 0.5xCH<sub>2</sub>), 2.45 – 2.40 (m, 6H, 2xSCH<sub>3</sub>), 2.40 – 2.32 (m, 1H, CH), 2.19 – 1.89 (m, 3H, 1.5xCH<sub>2</sub>), 1.89 – 1.79 (m, 1H, CH), 1.79 – 1.51 (m, 4H, 2xCH<sub>2</sub>), 1.41 (d, *J* = 1.5 Hz, 9H, Boc), 1.40 – 1.09 (m, 7H, 3.5xCH<sub>2</sub>), 1.08 – 0.96 (m, 6H, 2xCH<sub>3</sub>), 0.95 – 0.57 (m, 2H, CH<sub>2</sub>).

**HRMS:** C<sub>37</sub>H<sub>54</sub>N<sub>3</sub>O<sub>7</sub>PS<sub>2</sub> [M+Na]<sup>+</sup> calc. 770.3038 found 770.3029

**HPLC:** purity >97%; retention time 21.160 min

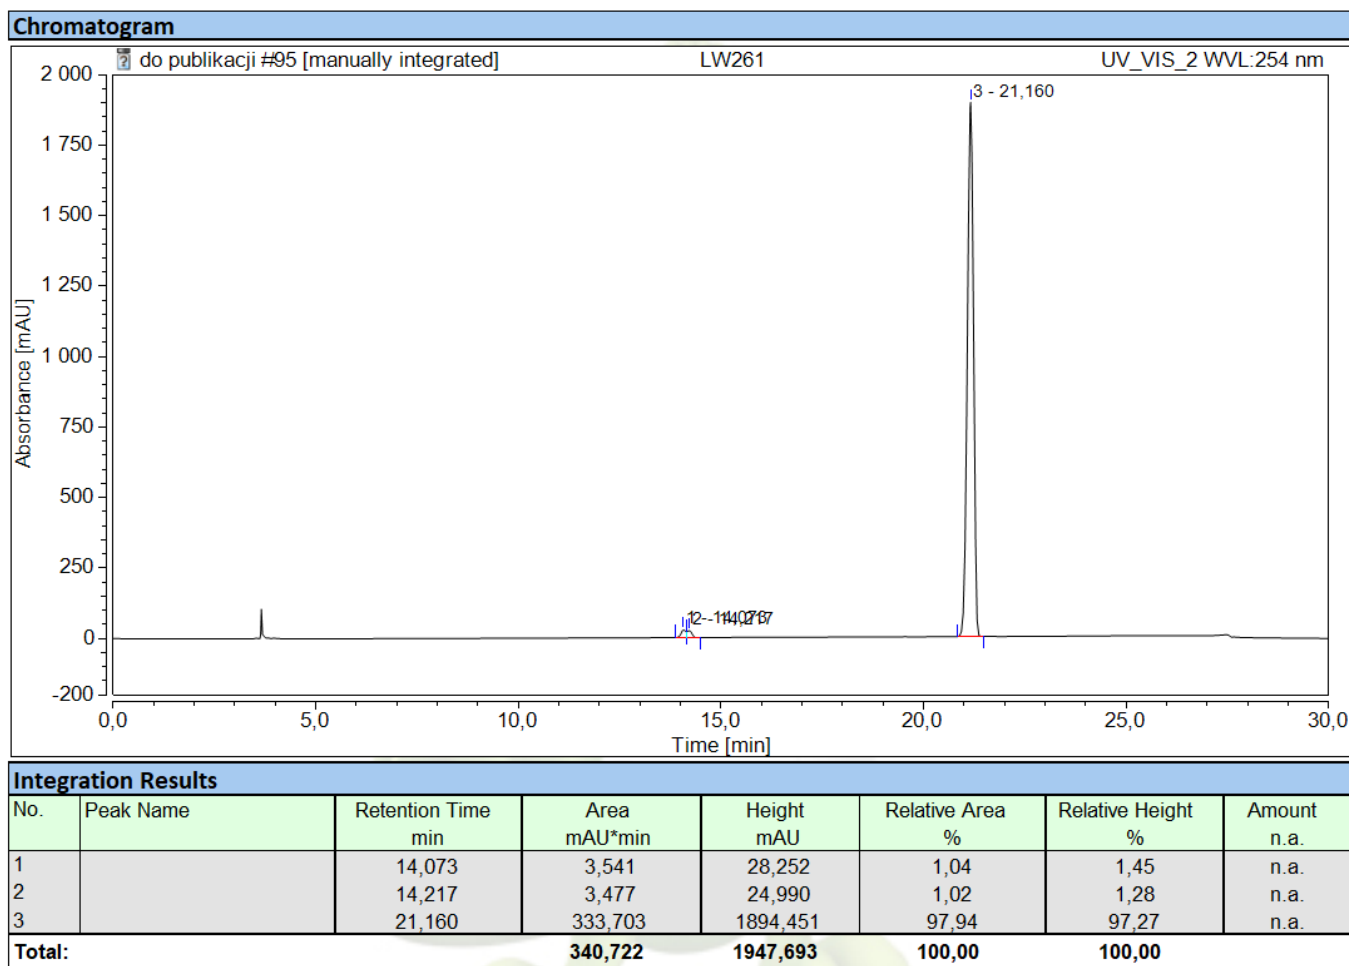



$^{31}\text{P}$  NMR (162 MHz, Chloroform-*d*)  $\delta$  18.34, 17.96.

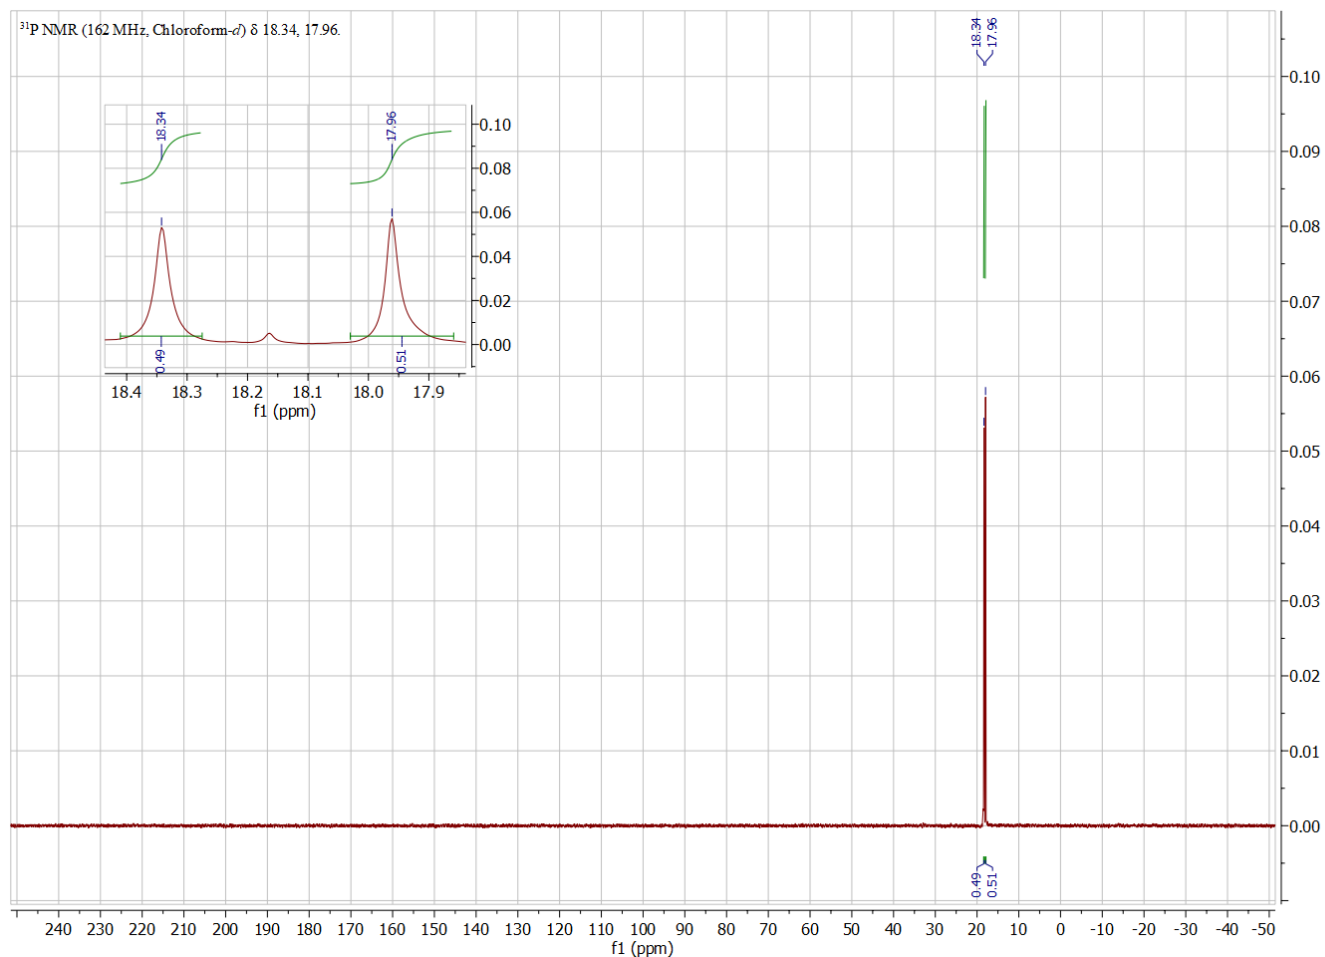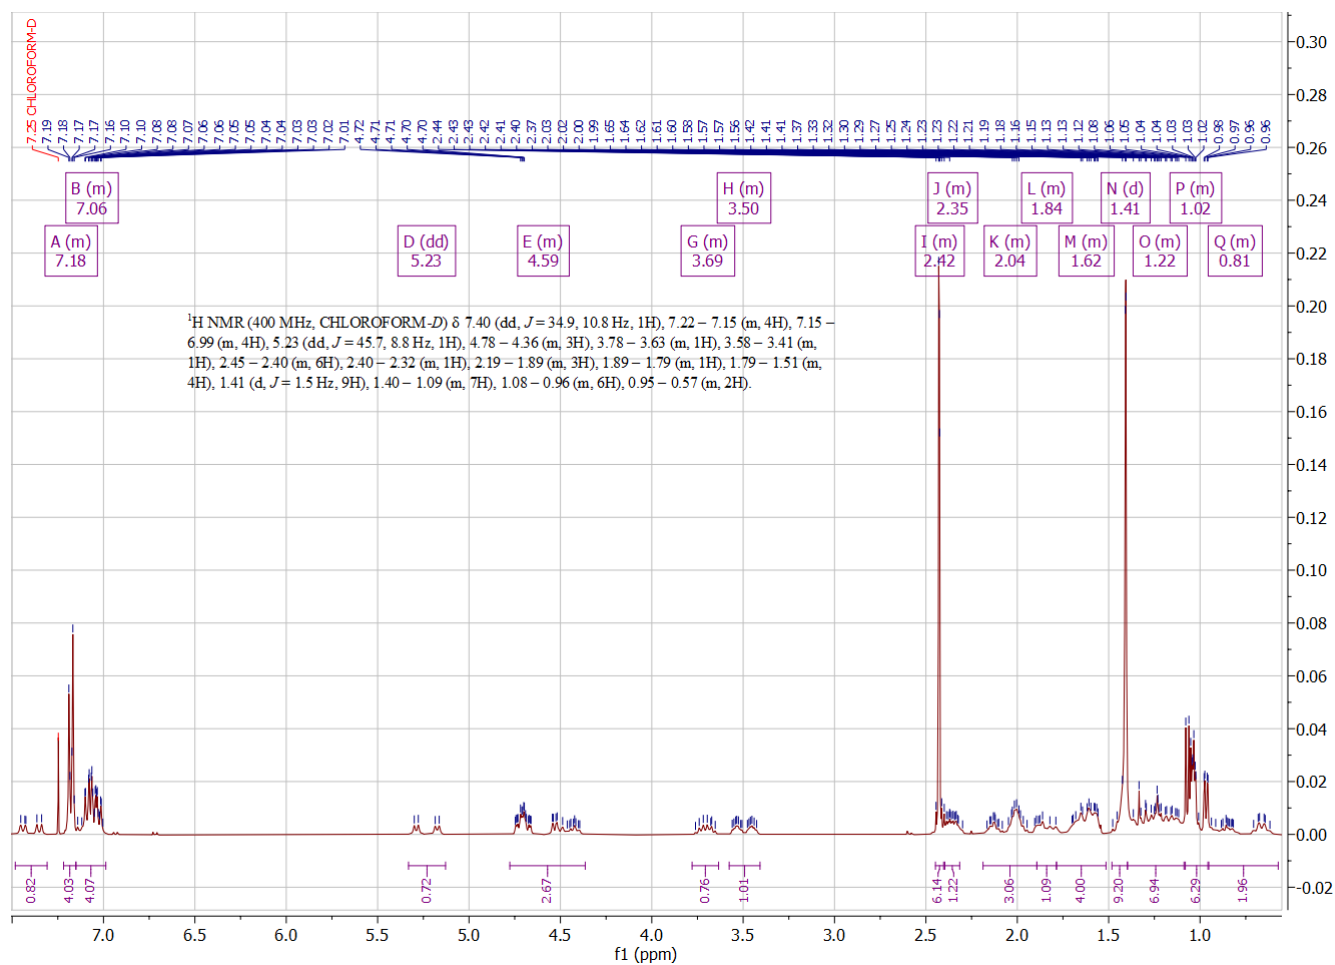

(96) Boc-L-HPhe-L-Pro-Val<sup>P</sup>(OPh-4-SCH<sub>3</sub>)<sub>2</sub>

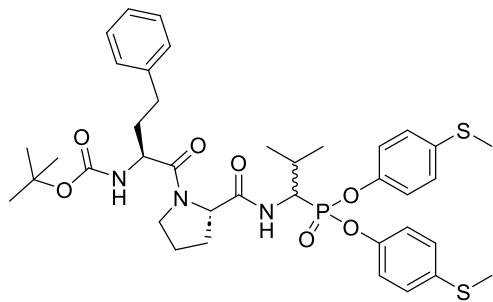

**Name:** *tert*-butyl ((2*S*)-1-((2*S*)-2-((1-(bis(4-(methylthio)phenoxy)phosphoryl)-2-methylpropyl)carbamoyl)pyrrolidin-1-yl)-1-oxo-4-phenylbutan-2-yl)carbamate

<sup>31</sup>P NMR (162 MHz, Chloroform-*d*) δ 18.52 (s, 51%), 18.00 (s, 49%).

<sup>1</sup>H NMR (400 MHz, Chloroform-*d*) δ 7.33 – 7.25 (m, 1H, NH), 7.24 – 6.90 (m, 13H, 13xArH), 5.32 (dd, *J* = 49.3, 8.9 Hz, 1H, NH), 4.75 – 4.30 (m, 3H, CHP, 2xCH), 3.57 – 3.41 (m, 1H, 0.5xCH<sub>2</sub>), 3.33 – 3.11 (m, 1H, 0.5xCH<sub>2</sub>), 2.79 – 2.49 (m, 2H, CH<sub>2</sub>), 2.43 (dd, *J* = 5.9, 2.3 Hz, 6H, 2xSCH<sub>3</sub>), 2.40 – 2.06 (m, 2H, 0.5xCH<sub>2</sub>, CH), 2.06 – 1.69 (m, 5H, 2.5xCH<sub>2</sub>), 1.43 (s, 9H, Boc), 1.11 – 0.94 (m, 6H, 2xCH<sub>3</sub>).

**HRMS:** C<sub>38</sub>H<sub>50</sub>N<sub>3</sub>O<sub>7</sub>PS<sub>2</sub> [M+Na]<sup>+</sup> calc. 778.2725 found 778.2719

**HPLC:** purity >99%; retention time 19.787 and 19.957 min

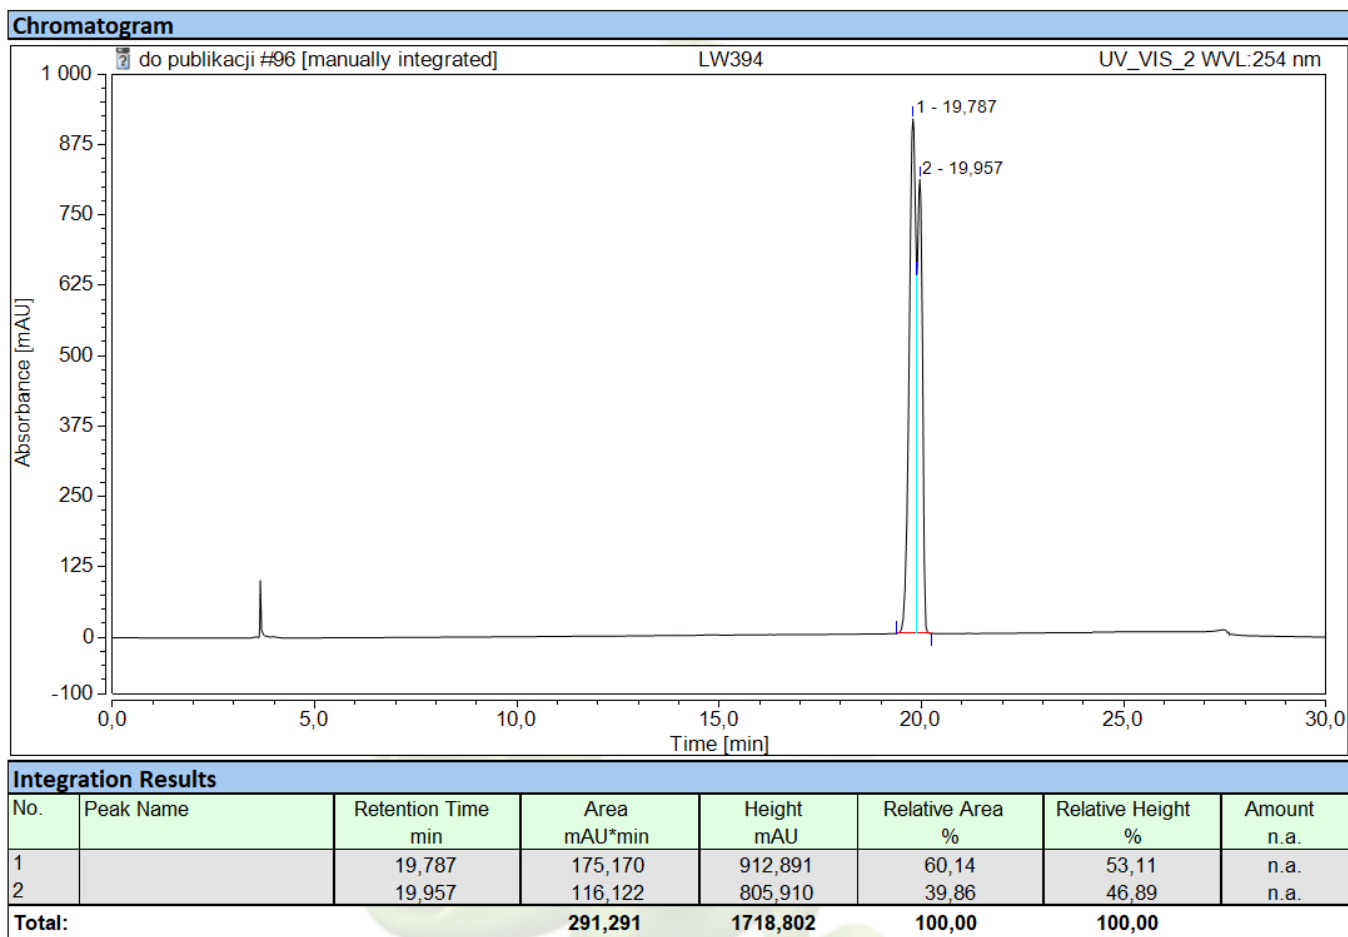

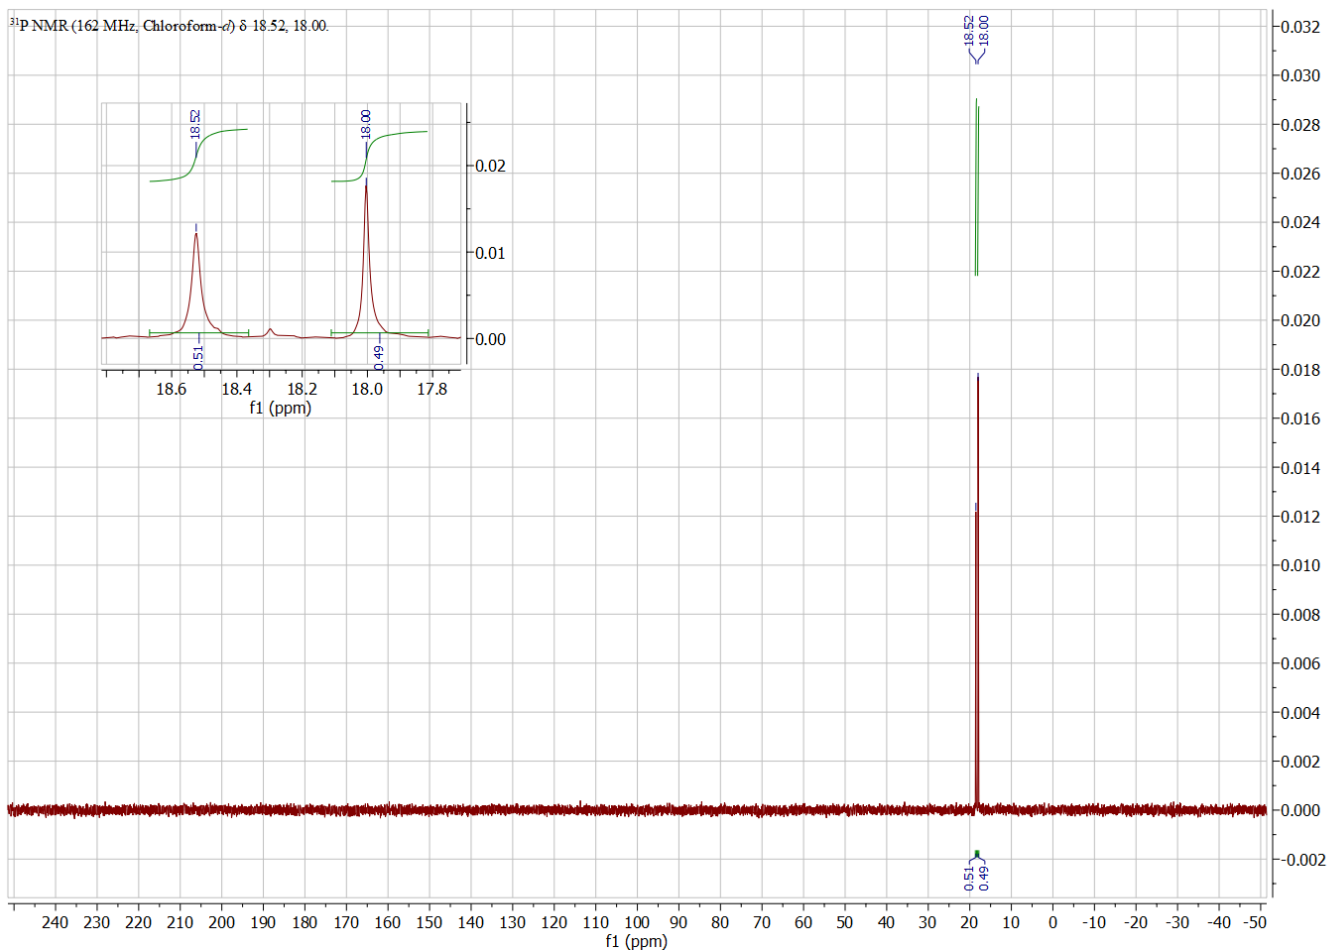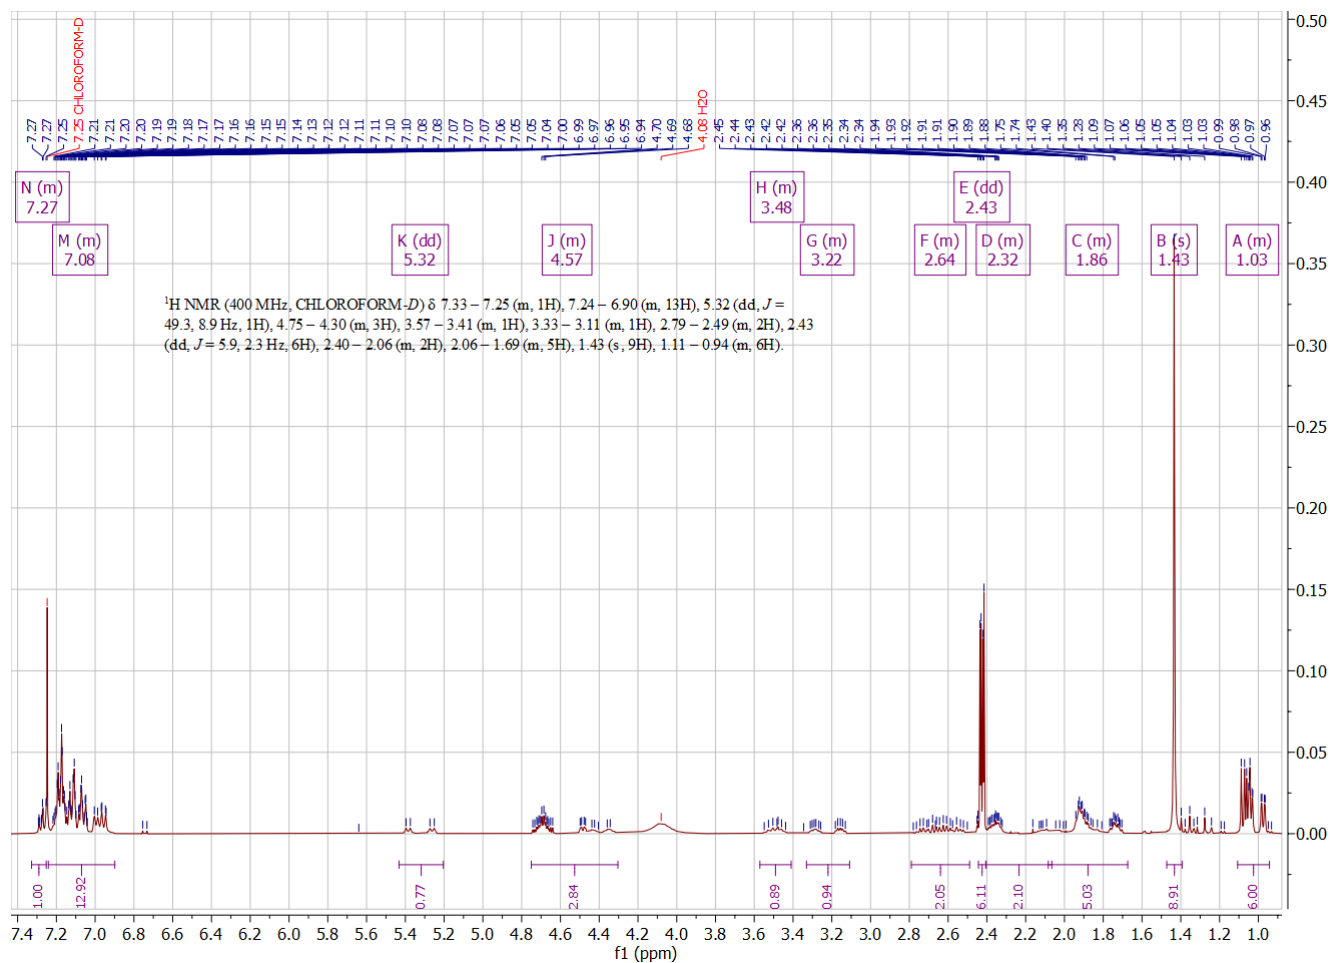

**(97) Boc-D-HPhe-L-Pro-Val<sup>P</sup>(OPh-4-SCH<sub>3</sub>)<sub>2</sub>**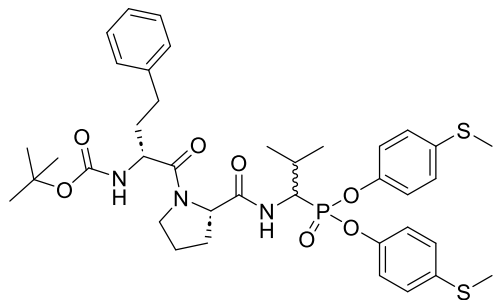

**Name:** *tert*-butyl ((2*R*)-1-((2*S*)-2-((1-(bis(4-(methylthio)phenoxy)phosphoryl)-2-methylpropyl)carbamoyl)pyrrolidin-1-yl)-1-oxo-4-phenylbutan-2-yl)carbamate

**<sup>31</sup>P NMR** (162 MHz, Chloroform-*d*) δ 18.48 (s, 57%), 18.18 (s, 43%).

**<sup>1</sup>H NMR** (400 MHz, Chloroform-*d*) δ 7.54 (dd, *J* = 73.6, 10.1 Hz, 1H, NH), 7.31 – 7.25 (m, 2H, 2xArH), 7.23 – 7.09 (m, 9H, 9xArH), 7.09 – 7.00 (m, 2H, 2xArH), 5.35 (dd, *J* = 15.8, 8.5 Hz, 1H, NH), 4.72 – 4.61 (m, 1H, CHP), 4.57 – 4.35 (m, 2H, 2xCH), 3.68 – 3.52 (m, 1H, 0.5xCH<sub>2</sub>), 3.21 – 3.10 (m, 1H, 0.5xCH<sub>2</sub>), 2.80 – 2.56 (m, 2H, CH<sub>2</sub>), 2.43 (dd, *J* = 4.5, 1.0 Hz, 6H, 2xSCH<sub>3</sub>), 2.41 – 2.11 (m, 2H, 0.5xCH<sub>2</sub>, CH), 2.11 – 1.67 (m, 5H, 2.5xCH<sub>2</sub>), 1.38 (d, *J* = 20.3 Hz, 9H, Boc), 1.10 – 0.92 (m, 6H, 3xCH<sub>3</sub>).

**HRMS:** C<sub>38</sub>H<sub>50</sub>N<sub>3</sub>O<sub>7</sub>PS<sub>2</sub> [M+Na]<sup>+</sup> calc. 778.2725 found 778.2717

**HPLC:** purity >98%; retention time 19.870 min

**Chromatogram**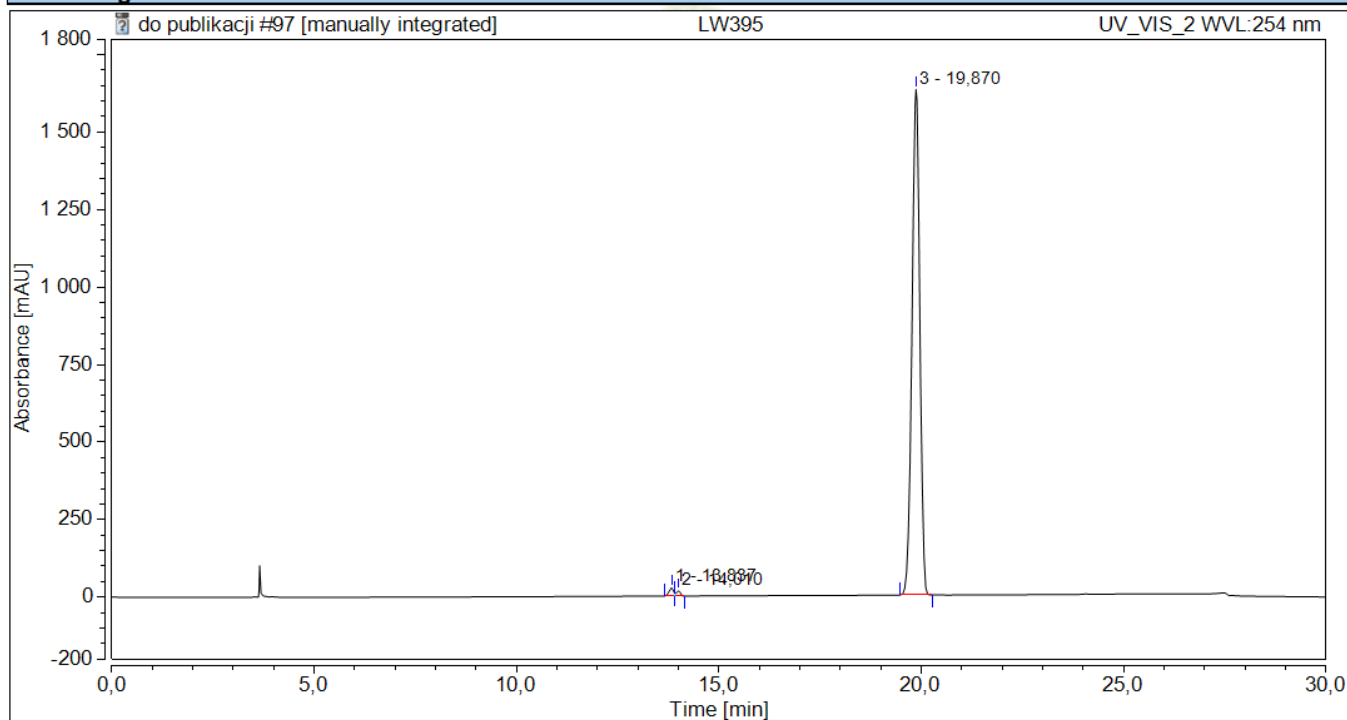**Integration Results**

| No.           | Peak Name | Retention Time<br>min | Area<br>mAU*min | Height<br>mAU   | Relative Area<br>% | Relative Height<br>% | Amount<br>n.a. |
|---------------|-----------|-----------------------|-----------------|-----------------|--------------------|----------------------|----------------|
| 1             |           | 13,837                | 3,329           | 27,341          | 0,91               | 1,63                 | n.a.           |
| 2             |           | 14,010                | 1,939           | 17,184          | 0,53               | 1,03                 | n.a.           |
| 3             |           | 19,870                | 361,799         | 1630,562        | 98,56              | 97,34                | n.a.           |
| <b>Total:</b> |           |                       | <b>367,067</b>  | <b>1675,087</b> | <b>100,00</b>      | <b>100,00</b>        |                |

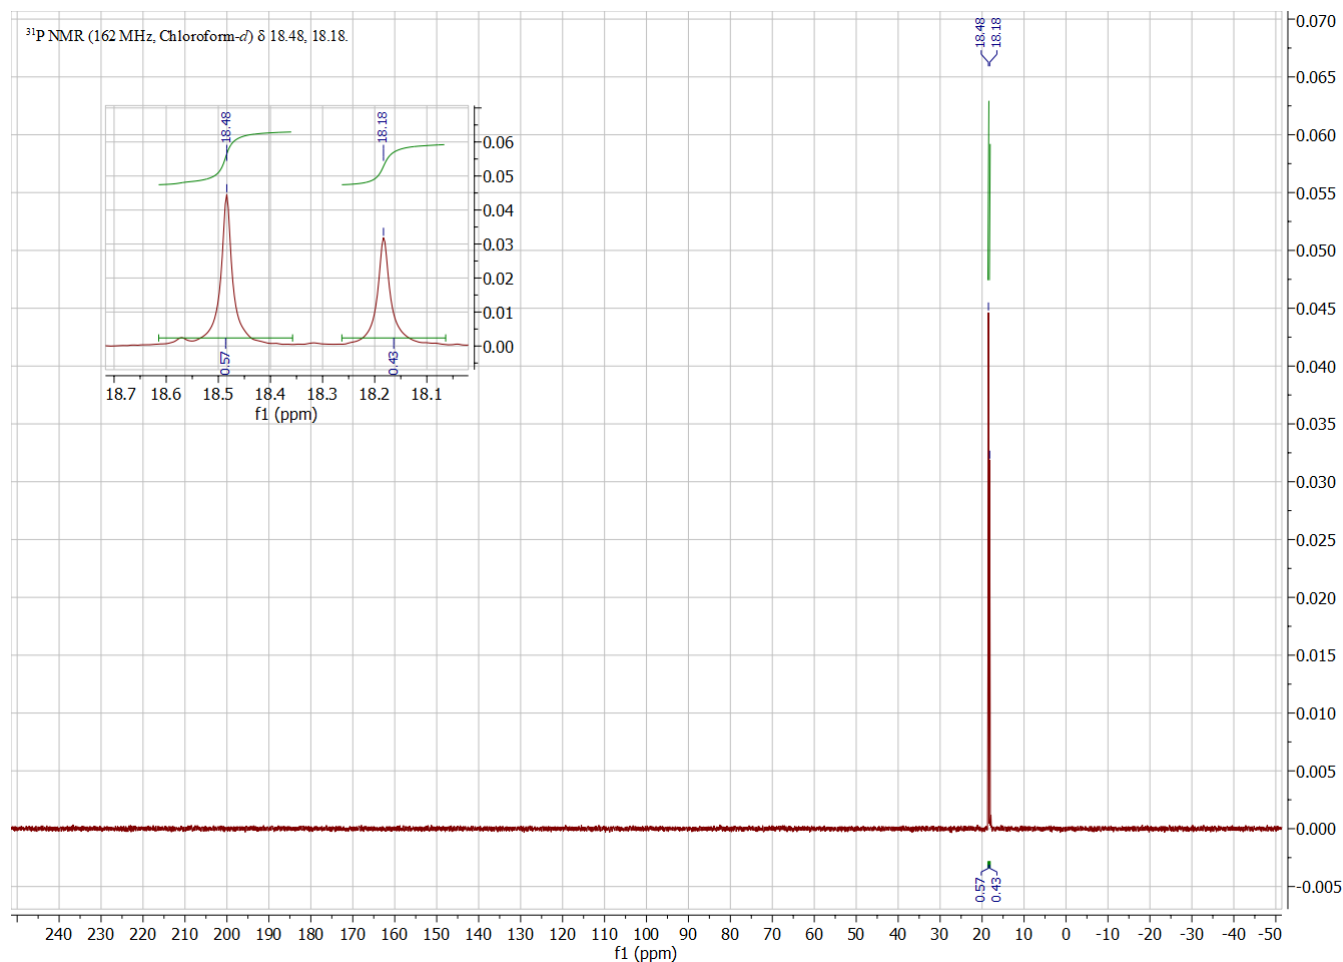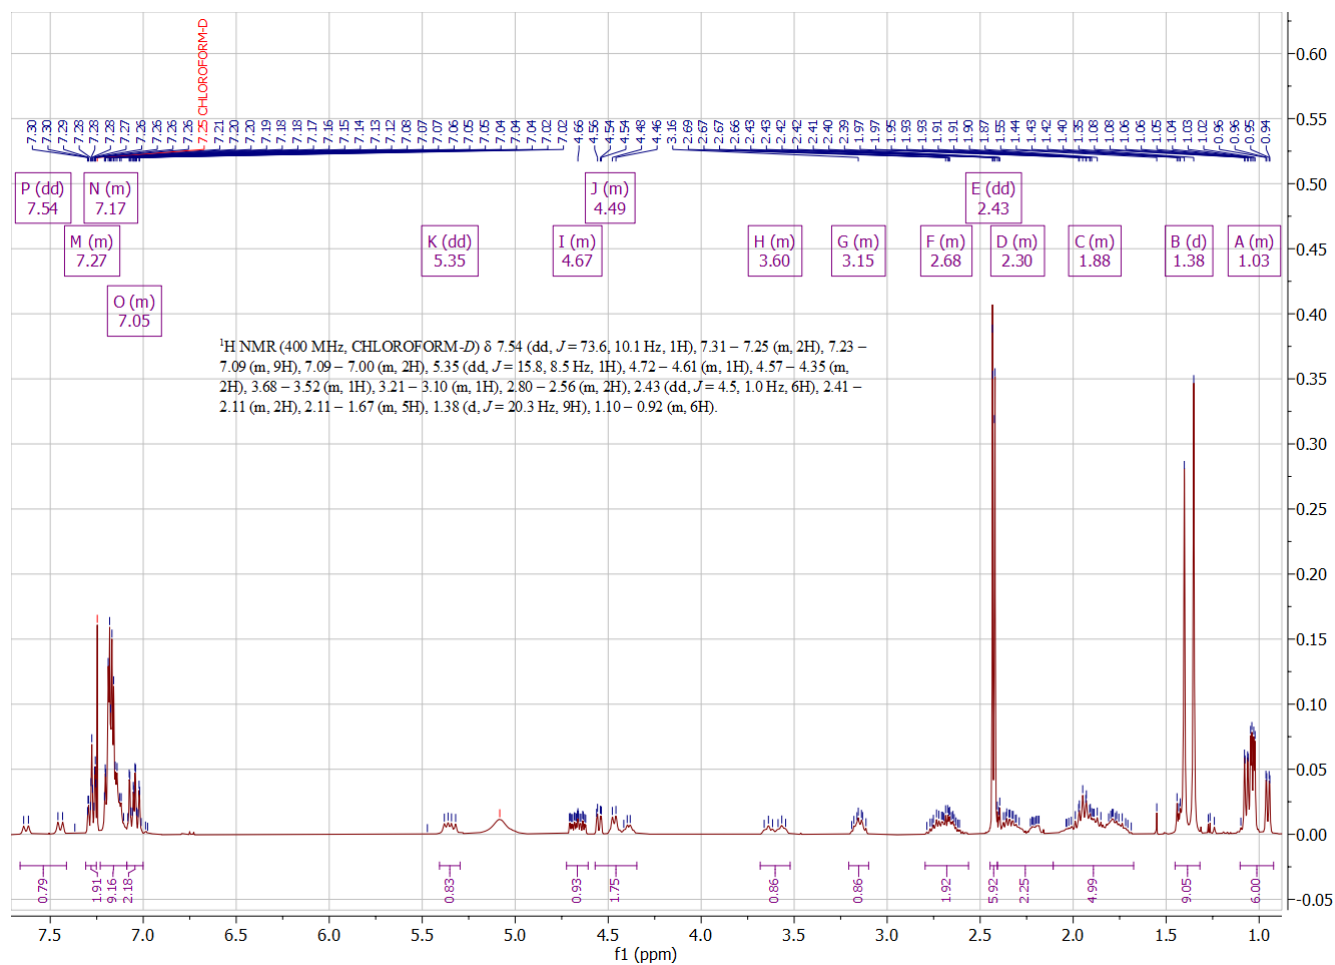

**(98) Boc-L-Igl-L-Pro-Val<sup>P</sup>(OPh-4-SCH<sub>3</sub>)<sub>2</sub>**

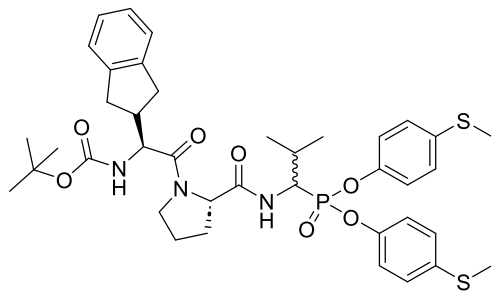

**Name:** tert-butyl ((1S)-2-((2S)-2-((1-(bis(4-(methylthio)phenoxy)phosphoryl)-2-methylpropyl)carbamoyl)pyrrolidin-1-yl)-1-(2,3-dihydro-1H-inden-2-yl)-2-oxoethyl)carbamate

**<sup>31</sup>P NMR** (162 MHz, Chloroform-d) δ 18.20 (s, 46%), 17.92 (s, 54%).

**<sup>1</sup>H NMR** (400 MHz, Chloroform-d) δ 7.34 (dd, J = 80.7, 10.3 Hz, 1H, NH), 7.22 – 6.97 (m, 12H, 12xArH), 5.48 (dd, J = 37.9, 8.9 Hz, 1H, NH), 4.84 – 4.74 (m, 1H, CHP), 4.71 – 4.52 (m, 1H, CH), 4.52 – 4.46 (m, 1H, CH), 3.84 – 3.73 (m, 1H, 0.5xCH<sub>2</sub>), 3.63 – 3.47 (m, 1H, 0.5xCH<sub>2</sub>), 3.05 – 2.53 (m, 5H, 2xCH<sub>2</sub>, CH), 2.47 – 2.34 (m, 7H, 2xSCH<sub>3</sub>, CH), 2.34 – 1.86 (m, 4H, 2xCH<sub>2</sub>), 1.40 (d, J = 2.6 Hz, 9H, Boc), 1.14 – 1.02 (m, 6H, 2xCH<sub>3</sub>).

**HRMS:** C<sub>39</sub>H<sub>50</sub>N<sub>3</sub>O<sub>7</sub>PS<sub>2</sub> [M+Na]<sup>+</sup> calc. 790.2725 found 790.2709

**HPLC:** purity >99%; retention time 20.087 min

**Chromatogram**

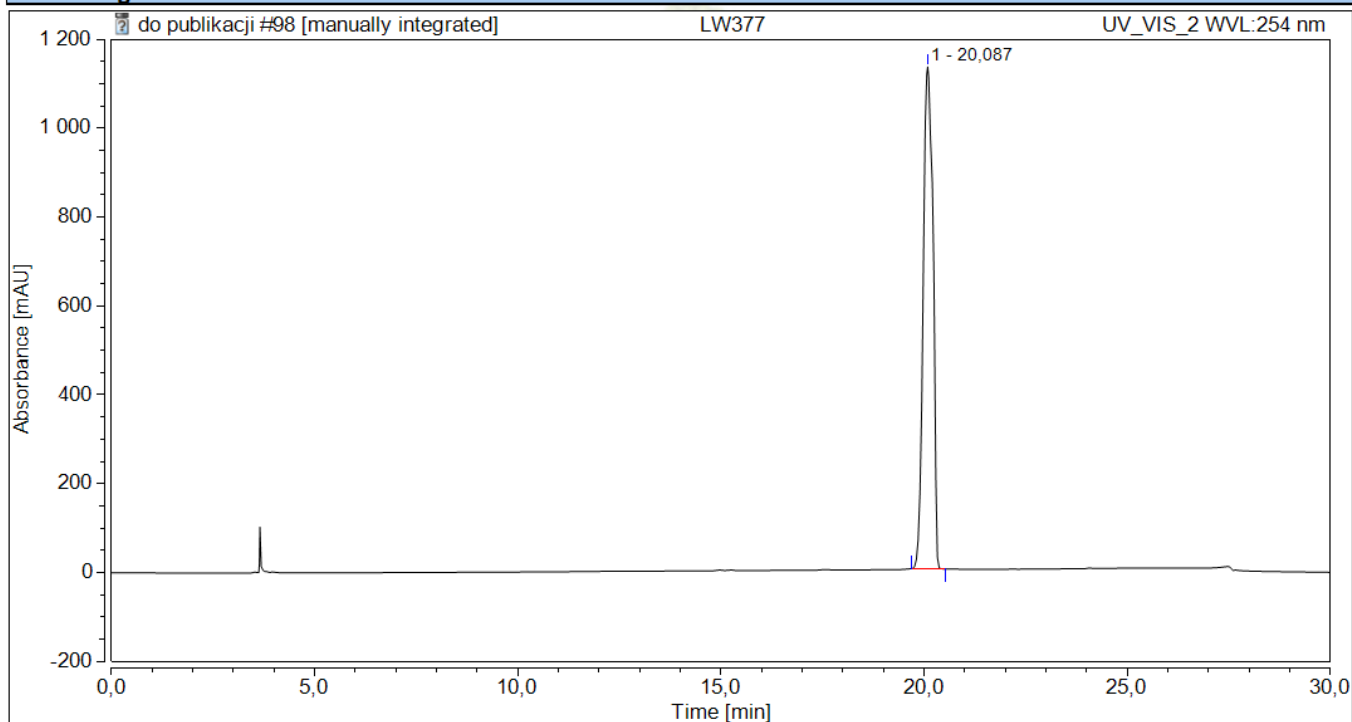

**Integration Results**

| No.    | Peak Name | Retention Time<br>min | Area<br>mAU*min | Height<br>mAU | Relative Area<br>% | Relative Height<br>% | Amount<br>n.a. |
|--------|-----------|-----------------------|-----------------|---------------|--------------------|----------------------|----------------|
| 1      |           | 20,087                | 314,259         | 1129,711      | 100,00             | 100,00               | n.a.           |
| Total: |           |                       | 314,259         | 1129,711      | 100,00             | 100,00               |                |

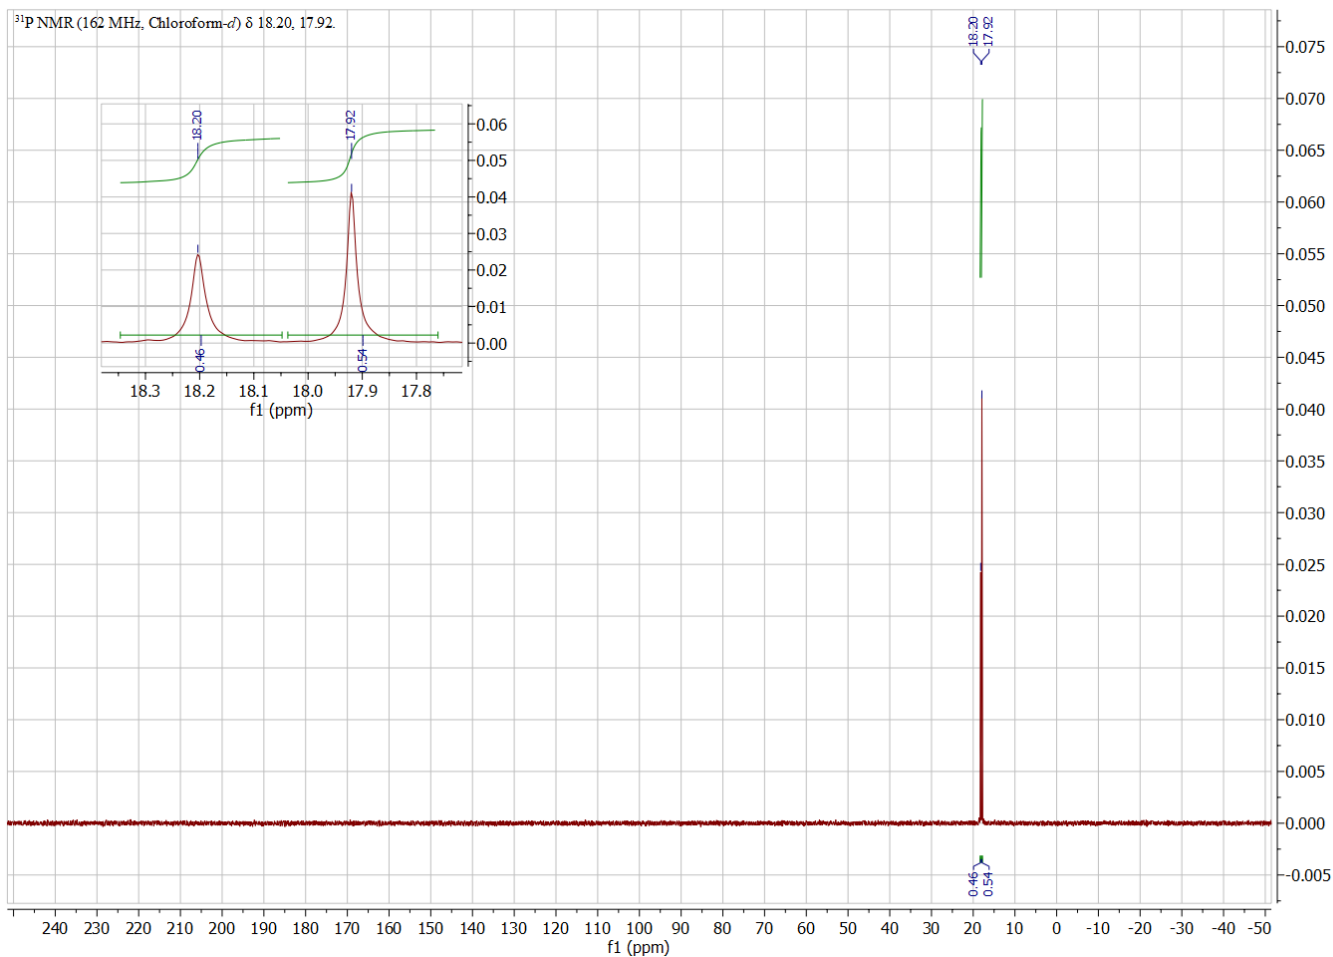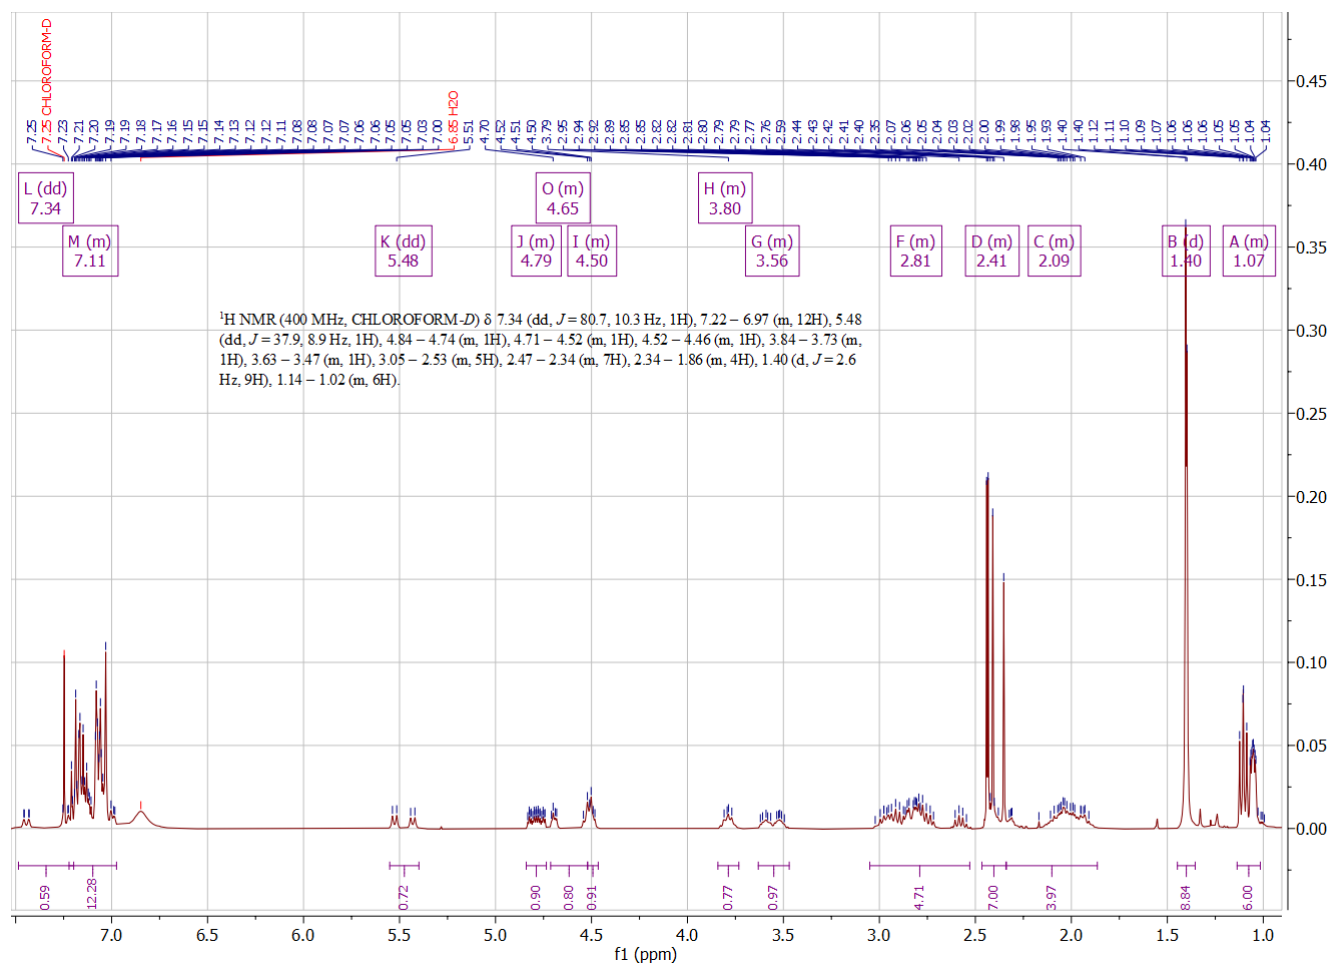

**(99) Boc-D-Igl-L-Pro-Val<sup>P</sup>(OPh-4-SCH<sub>3</sub>)<sub>2</sub>**

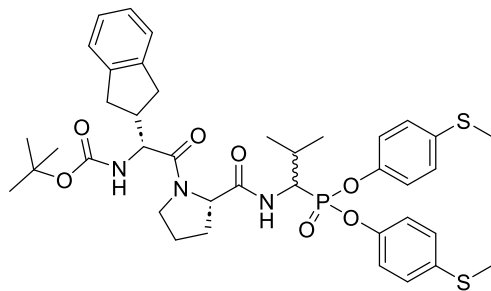

**Name:** tert-butyl ((1R)-2-((2S)-2-((1-(bis(4-(methylthio)phenoxy)phosphoryl)-2-methylpropyl)carbamoyl)pyrrolidin-1-yl)-1-(2,3-dihydro-1H-inden-2-yl)-2-oxoethyl)carbamate

**<sup>31</sup>P NMR** (162 MHz, Chloroform-d) δ 18.33 (s, 50%), 18.07 (s, 50%).

**<sup>1</sup>H NMR** (400 MHz, Chloroform-d) δ 7.52 (dd, J = 80.8, 10.4 Hz, 1H, NH), 7.22 – 7.11 (m, 9H, 9xArH), 7.11 – 7.01 (m, 3H, 3xArH), 5.40 (t, J = 8.8 Hz, 1H, NH), 4.77 – 4.67 (m, 1H, CHP), 4.67 – 4.58 (m, 1H, CH), 4.58 – 4.47 (m, 1H, CH), 3.90 – 3.77 (m, 1H, 0.5xCH<sub>2</sub>), 3.54 – 3.41 (m, 1H, 0.5xCH<sub>2</sub>), 3.05 – 2.91 (m, 2H, CH<sub>2</sub>), 2.91 – 2.76 (m, 2H, CH<sub>2</sub>), 2.74 – 2.63 (m, 1H, CH), 2.43 (dd, J = 3.1, 2.1 Hz, 6H, 2xSCH<sub>3</sub>), 2.42 – 2.20 (m, 2H, 0.5xCH<sub>2</sub>, CH), 2.17 – 1.81 (m, 3H, 1.5xCH<sub>2</sub>), 1.36 (d, J = 23.4 Hz, 9H, Boc), 1.12 – 0.94 (m, 6H, 2xCH<sub>3</sub>).

**HRMS:** C<sub>39</sub>H<sub>50</sub>N<sub>3</sub>O<sub>7</sub>PS<sub>2</sub> [M+Na]<sup>+</sup> calc. 790.2725 found 790.2712

**HPLC:** purity >99%; retention time 20.110 min

**Chromatogram**

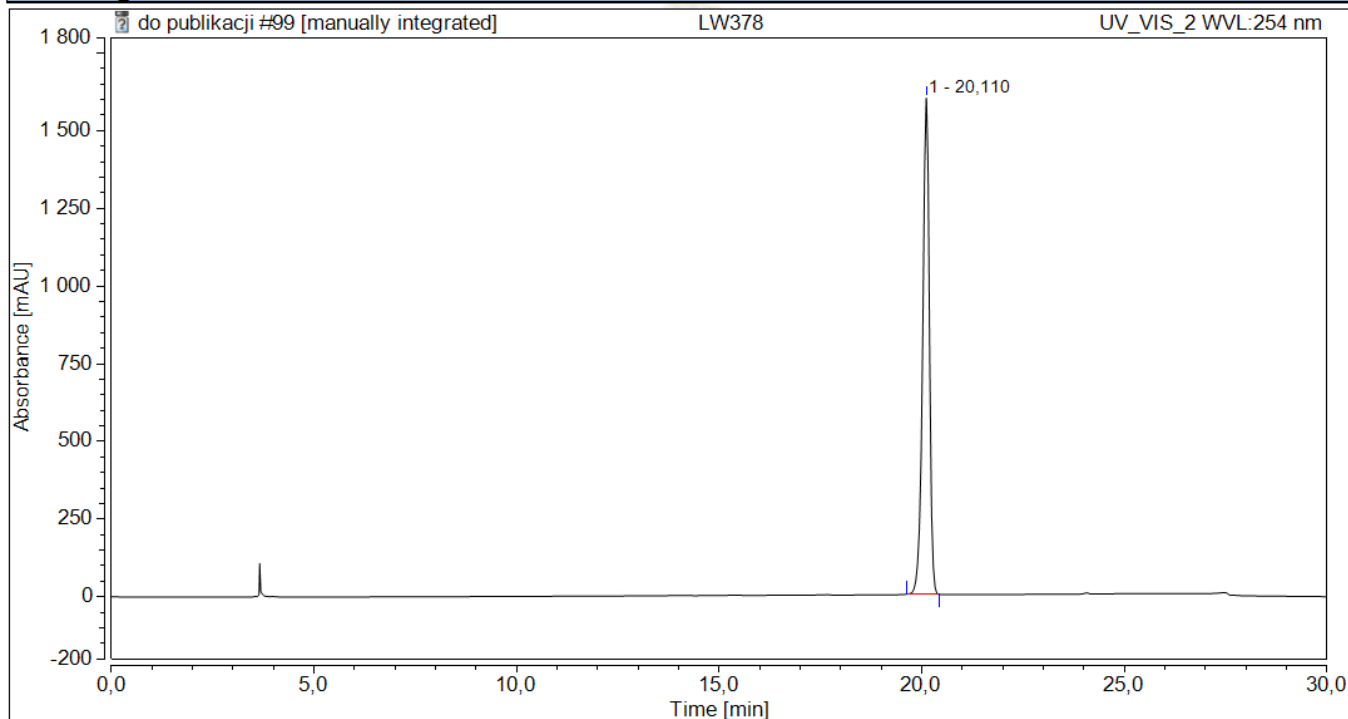

**Integration Results**

| No.           | Peak Name | Retention Time<br>min | Area<br>mAU*min | Height<br>mAU   | Relative Area<br>% | Relative Height<br>% | Amount<br>n.a. |
|---------------|-----------|-----------------------|-----------------|-----------------|--------------------|----------------------|----------------|
| 1             |           | 20,110                | 307,149         | 1596,423        | 100,00             | 100,00               | n.a.           |
| <b>Total:</b> |           |                       | <b>307,149</b>  | <b>1596,423</b> | <b>100,00</b>      | <b>100,00</b>        |                |



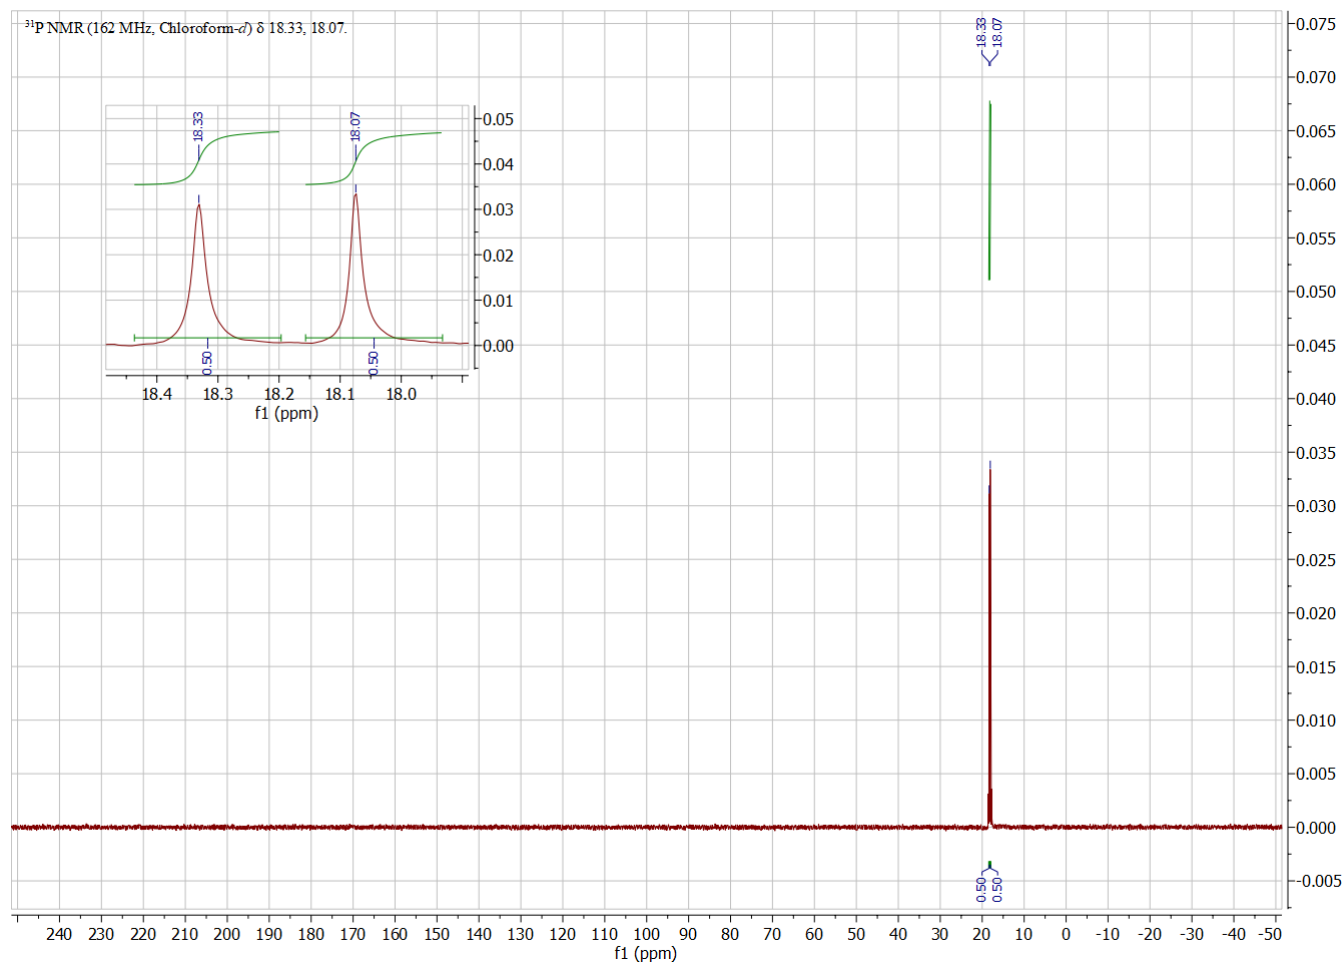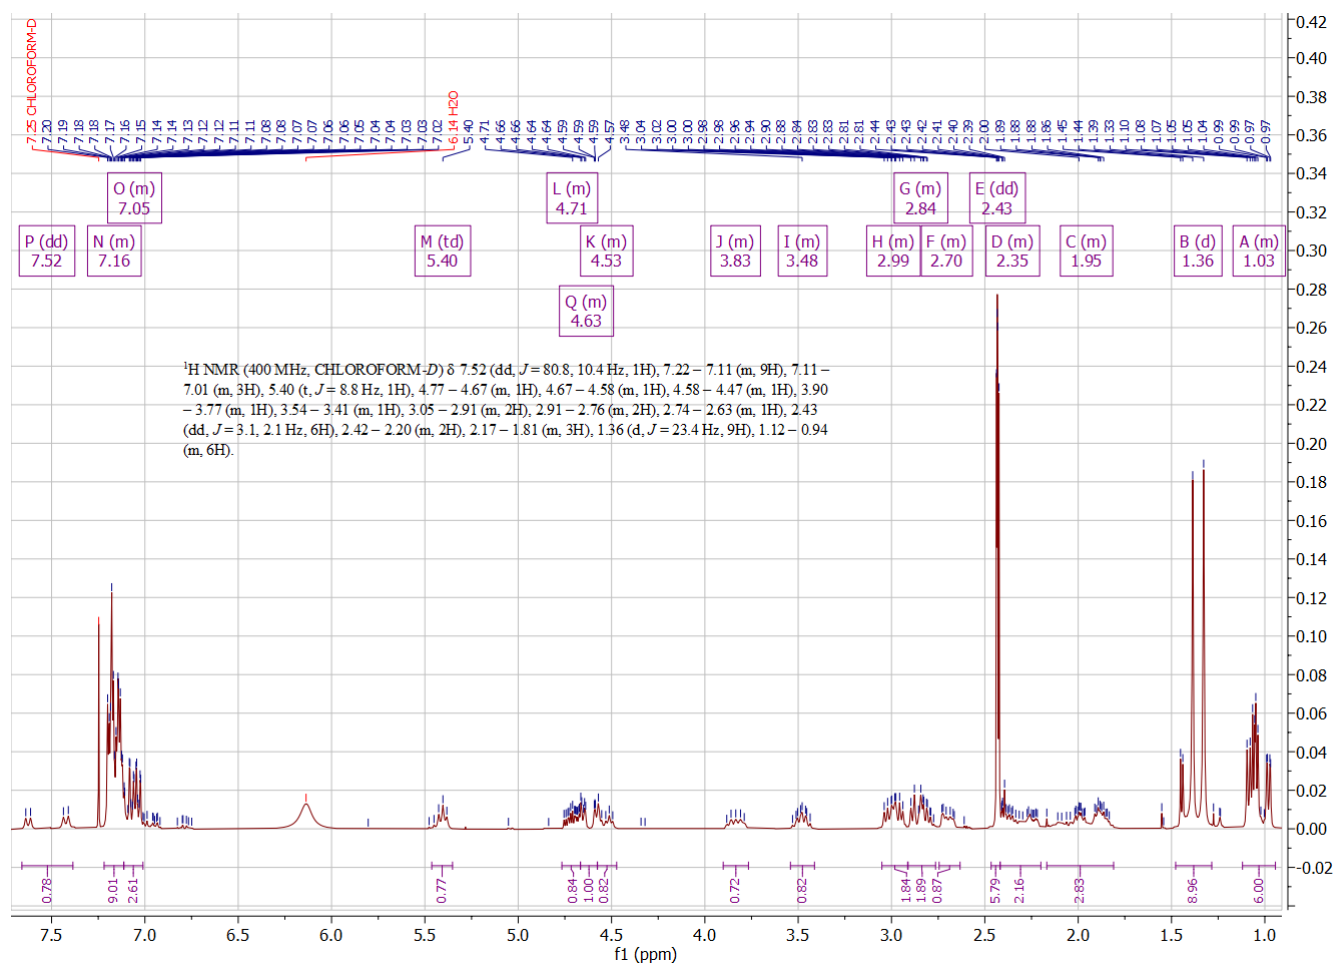

**(100) Boc-L-Thr(Bzl)-L-Pro- Val<sup>P</sup>(OPh-4-SCH<sub>3</sub>)<sub>2</sub>**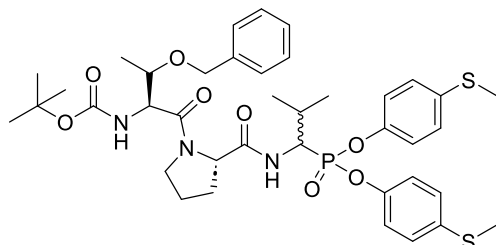

**Name:** *tert*-butyl ((2*S*,3*S*)-3-(benzyloxy)-1-((2*S*)-2-((1-(bis(4-(methylthio)phenoxy)phosphoryl)-2-methylpropyl)carbamoyl)pyrrolidin-1-yl)-1-oxobutan-2-yl)carbamate

<sup>31</sup>P NMR (162 MHz, Chloroform-*d*) δ 18.59 (s, 46%), 18.11 (s, 54%).

<sup>1</sup>H NMR (400 MHz, Chloroform-*d*) δ 7.36 – 7.22 (m, 5H, 4xArH, NH), 7.22 – 7.01 (m, 9H, 9xArH), 5.44 (dd, *J* = 47.0, 8.2 Hz, 1H, NH), 4.83 – 4.26 (m, 5H, CH<sub>2</sub>, CHP, 2xCH), 3.92 – 3.43 (m, 3H, CH<sub>2</sub>, CH), 2.49 – 2.39 (m, 6H, 2xSCH<sub>3</sub>), 2.39 – 2.23 (m, 1H, CH), 2.23 – 1.97 (m, 2H, CH<sub>2</sub>), 1.97 – 1.78 (m, 2H, CH<sub>2</sub>), 1.40 (d, *J* = 6.6 Hz, 9H, Boc), 1.18 (dd, *J* = 22.2, 6.3 Hz, 3H, CH<sub>3</sub>), 1.09 (td, *J* = 7.3, 7.3 Hz, 3H, CH<sub>3</sub>), 1.00 (dd, *J* = 14.5, 6.8 Hz, 3H, CH<sub>3</sub>).

**HRMS:** C<sub>39</sub>H<sub>52</sub>N<sub>3</sub>O<sub>8</sub>PS<sub>2</sub> [M+Na]<sup>+</sup> calc. 808.2831 found 808.2800

**HPLC:** purity >99%; retention time 20.043 min

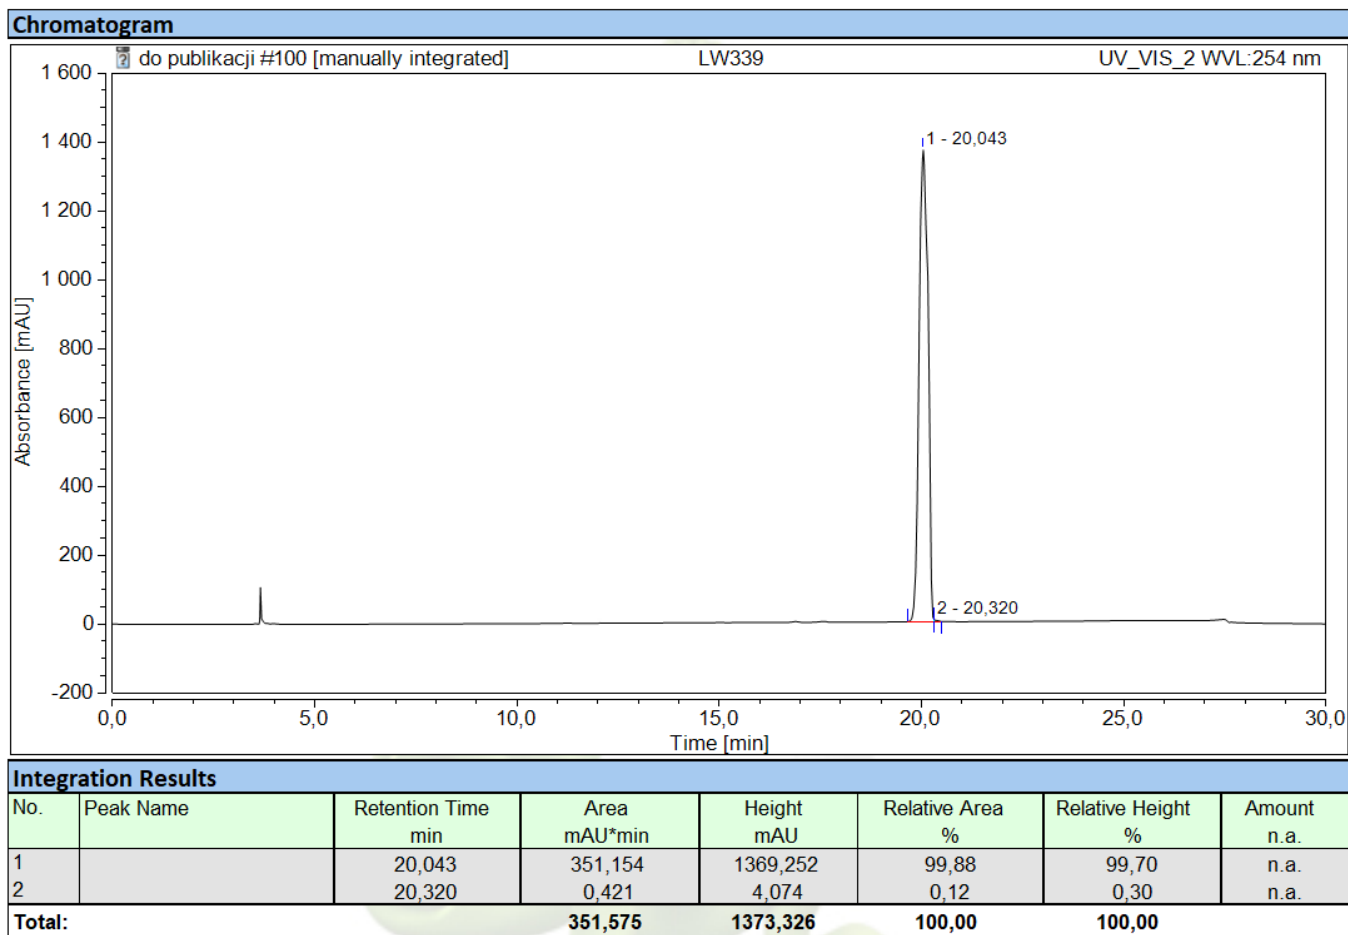

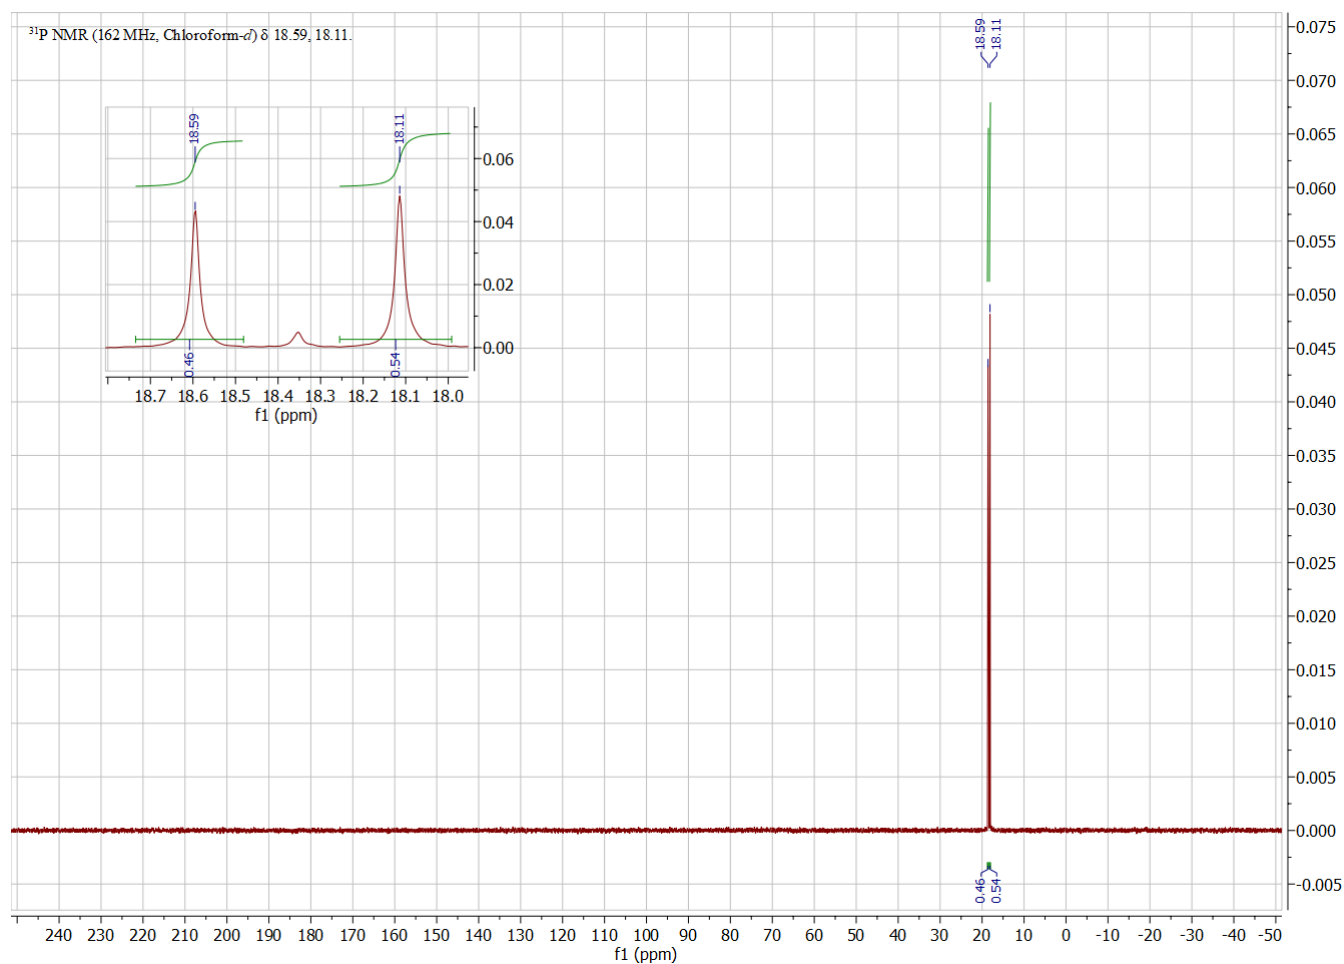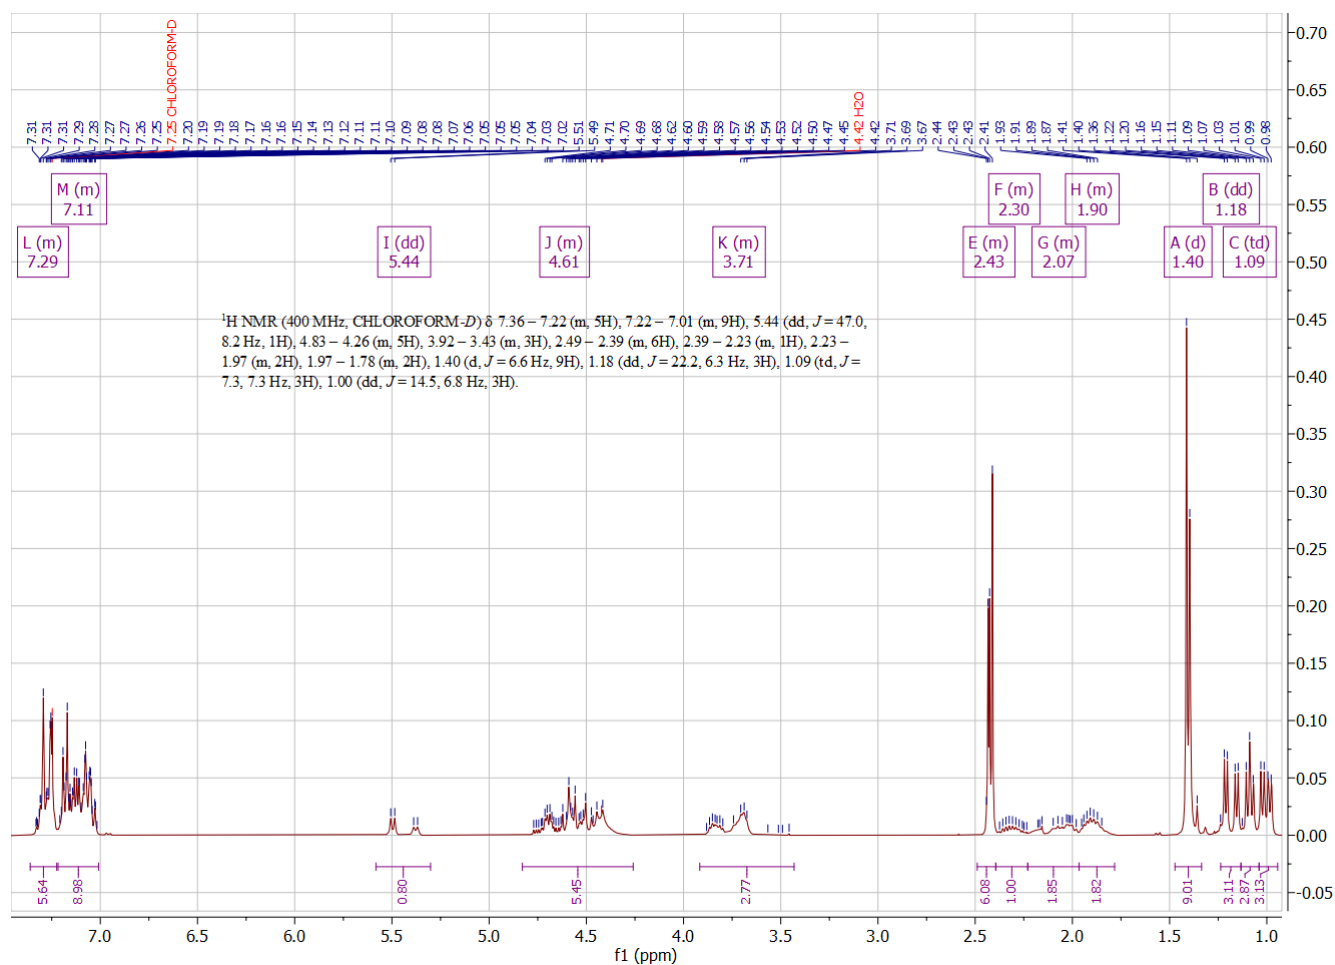

(101) Boc-L-Cys(Bzl)-L-Pro- Val<sup>P</sup>(OPh-4-SCH<sub>3</sub>)<sub>2</sub>

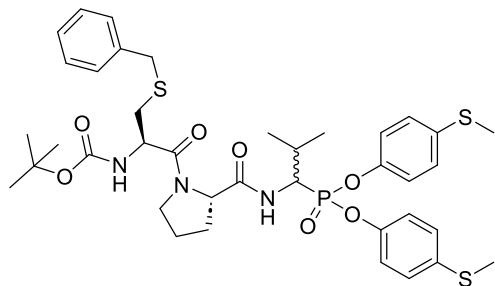

**Name:** *tert*-butyl ((2R)-3-(benzylthio)-1-((2S)-2-((1-(bis(4-(methylthio)phenoxy)phosphoryl)-2-methylpropyl)carbamoyl)pyrrolidin-1-yl)-1-oxopropan-2-yl)carbamate

<sup>31</sup>P NMR (162 MHz, Chloroform-d) δ 18.44 (s, 54%), 17.92 (s, 46%).

<sup>1</sup>H NMR (400 MHz, Chloroform-d) δ 7.35 – 7.25 (m, 3H, 2xArH, NH), 7.25 – 7.14 (m, 7H, 7xArH), 7.14 – 6.98 (m, 4H, 4xArH), 5.34 (dd, J = 22.6, 8.7 Hz, 1H, NH), 4.76 – 4.49 (m, 3H, CHP, 2xCH), 3.75 – 3.55 (m, 3H, 1.5xCH<sub>2</sub>), 3.50 – 3.34 (m, 1H, 0.5xCH<sub>2</sub>), 2.75 – 2.50 (m, 2H, CH<sub>2</sub>), 2.46 – 2.41 (m, 6H, 2xSCH<sub>3</sub>), 2.41 – 2.28 (m, 1H, CH), 2.28 – 2.15 (m, 1H, 0.5xCH<sub>2</sub>), 2.11 – 1.78 (m, 3H, 1.5xCH<sub>2</sub>), 1.42 (d, J = 4.5 Hz, 9H, Boc), 1.11 – 0.95 (m, 6H, 2xCH<sub>3</sub>).

**HRMS:** C<sub>38</sub>H<sub>50</sub>N<sub>3</sub>O<sub>7</sub>PS<sub>3</sub> [M+Na]<sup>+</sup> calc. 810.2446 found 810.2424

**HPLC:** purity >99%; retention time 19.920 min

**Chromatogram**

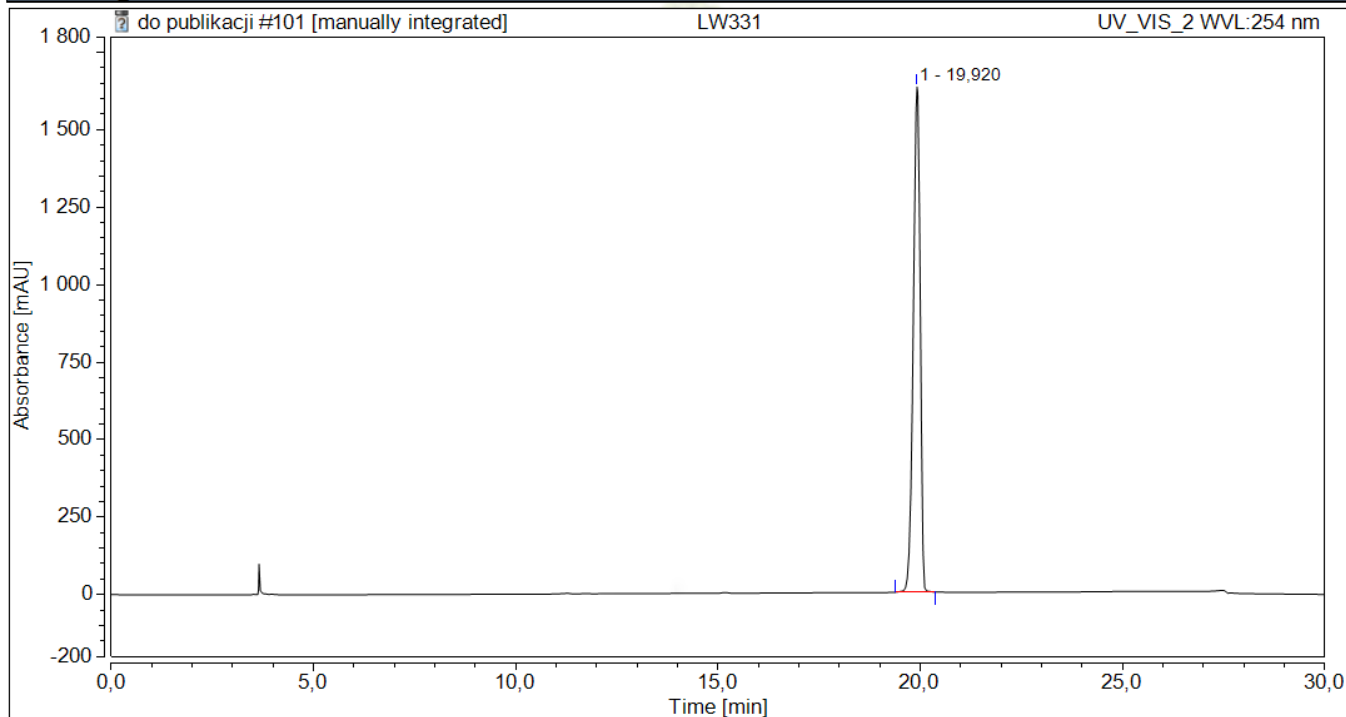

**Integration Results**

| No.           | Peak Name | Retention Time<br>min | Area<br>mAU*min | Height<br>mAU   | Relative Area<br>% | Relative Height<br>% | Amount<br>n.a. |
|---------------|-----------|-----------------------|-----------------|-----------------|--------------------|----------------------|----------------|
| 1             |           | 19,920                | 320,986         | 1630,093        | 100,00             | 100,00               | n.a.           |
| <b>Total:</b> |           |                       | <b>320,986</b>  | <b>1630,093</b> | <b>100,00</b>      | <b>100,00</b>        |                |

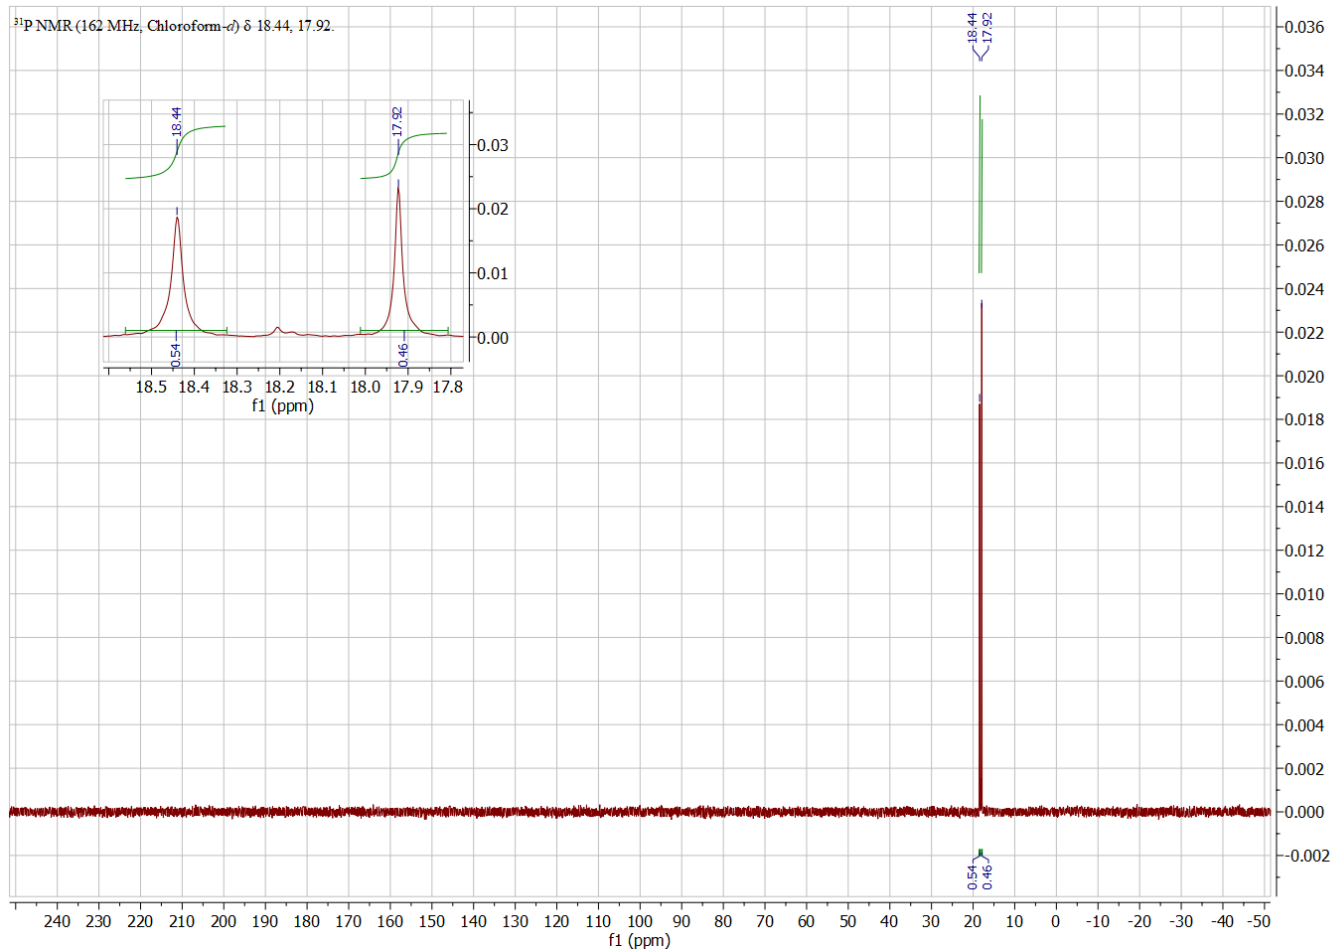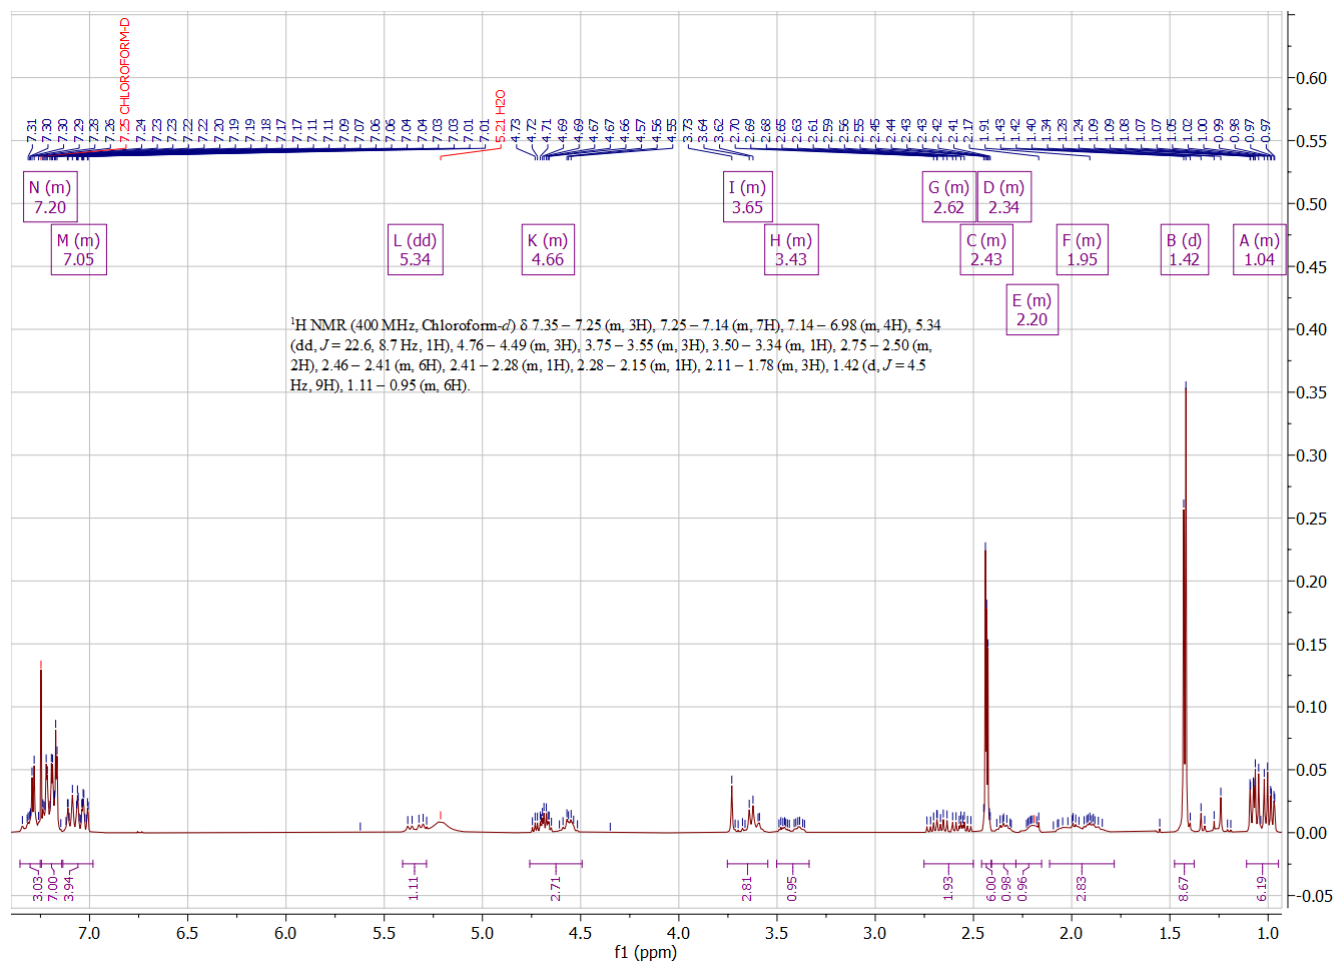

(102) Boc-D-Cys(Bzl)-L-Pro-Val<sup>P</sup>(OPh-4-SCH<sub>3</sub>)<sub>2</sub>

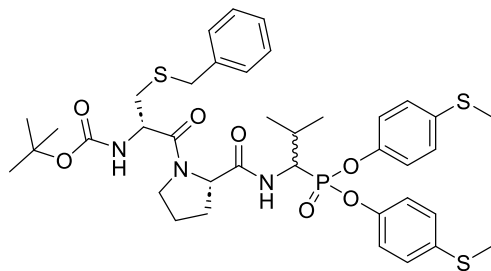

**Name:** *tert*-butyl ((2*S*)-3-(benzylthio)-1-((2*S*)-2-((1-(bis(4-(methylthio)phenoxy)phosphoryl)-2-methylpropyl)carbamoyl)pyrrolidin-1-yl)-1-oxopropan-2-yl)carbamate

<sup>31</sup>P NMR (162 MHz, Chloroform-*d*) δ 18.72 (s, 52%), 18.28 (s, 48%).

<sup>1</sup>H NMR (400 MHz, Chloroform-*d*) δ 7.64 – 7.51 (m, 1H, NH), 7.35 – 7.25 (m, 4H, 4xArH), 7.24 – 7.09 (m, 7H, 7xArH), 7.09 – 6.99 (m, 2H, 2xArH), 5.36 (dd, *J* = 87.1, 8.5 Hz, 1H, NH), 4.75 – 4.35 (m, 3H, CHP, 2xCH), 3.76 – 3.66 (m, 2H, CH<sub>2</sub>), 3.58 – 3.24 (m, 2H, CH<sub>2</sub>), 2.81 – 2.58 (m, 2H, CH<sub>2</sub>), 2.45 – 2.39 (m, 6H, 2xSCH<sub>3</sub>), 2.38 – 2.30 (m, 2H, 0.5xCH<sub>2</sub>, CH), 2.09 – 1.96 (m, 1H, 0.5xCH<sub>2</sub>), 1.95 – 1.73 (m, 2H, CH<sub>2</sub>), 1.37 (d, *J* = 22.5 Hz, 9H, Boc), 1.09 – 0.93 (m, 6H, 2xCH<sub>3</sub>).

**HRMS:** C<sub>38</sub>H<sub>50</sub>N<sub>3</sub>O<sub>7</sub>PS<sub>3</sub> [M+Na]<sup>+</sup> calc. 810.2446 found 810.2432

**HPLC:** purity >99%; retention time 20.047 min

**Chromatogram**

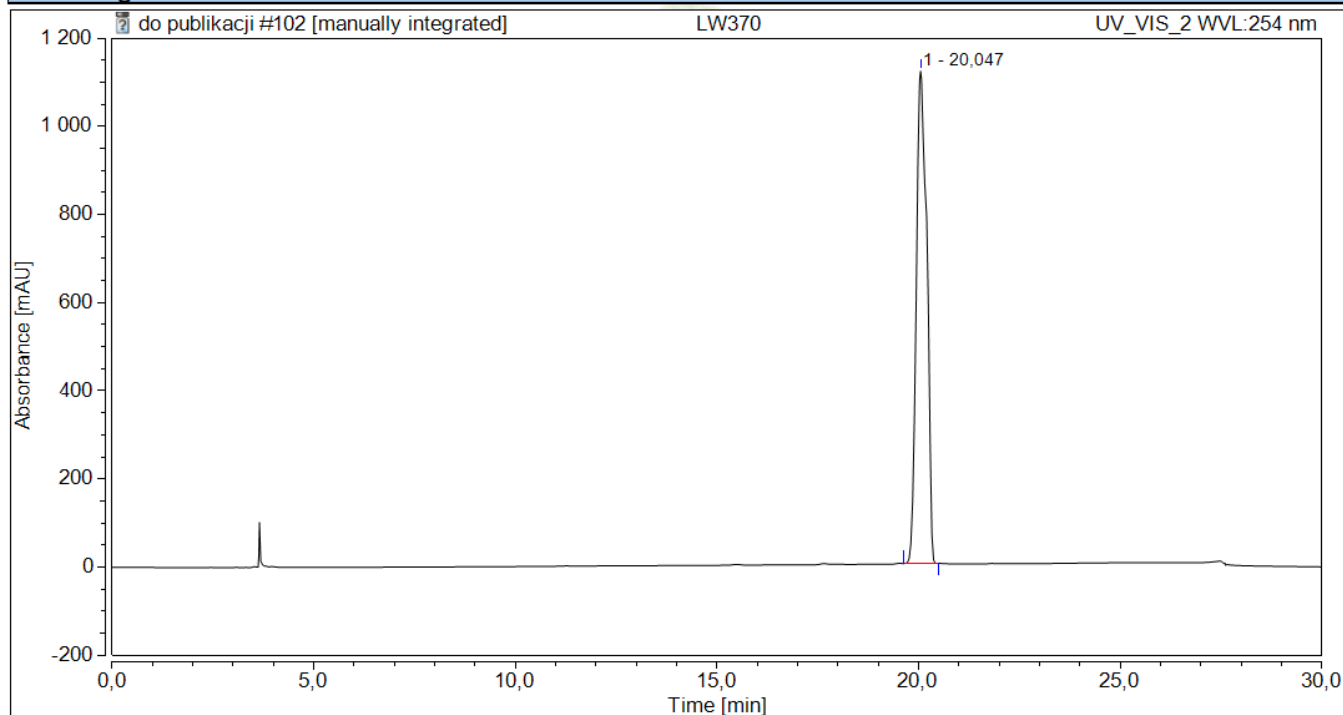

**Integration Results**

| No.           | Peak Name | Retention Time<br>min | Area<br>mAU*min | Height<br>mAU   | Relative Area<br>% | Relative Height<br>% | Amount<br>n.a. |
|---------------|-----------|-----------------------|-----------------|-----------------|--------------------|----------------------|----------------|
| 1             |           | 20,047                | 336,444         | 1116,895        | 100,00             | 100,00               | n.a.           |
| <b>Total:</b> |           |                       | <b>336,444</b>  | <b>1116,895</b> | <b>100,00</b>      | <b>100,00</b>        |                |

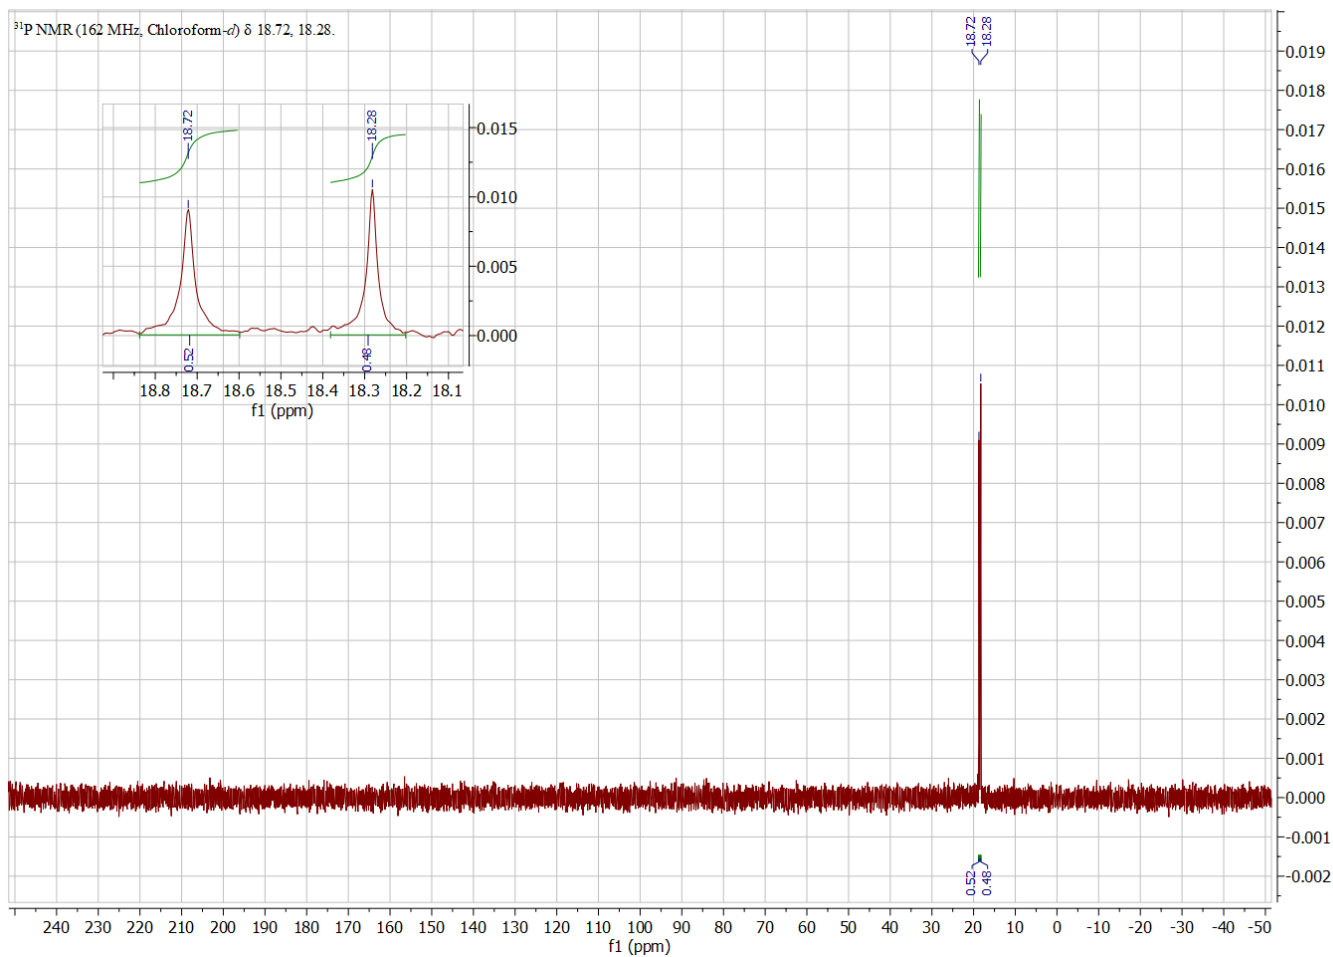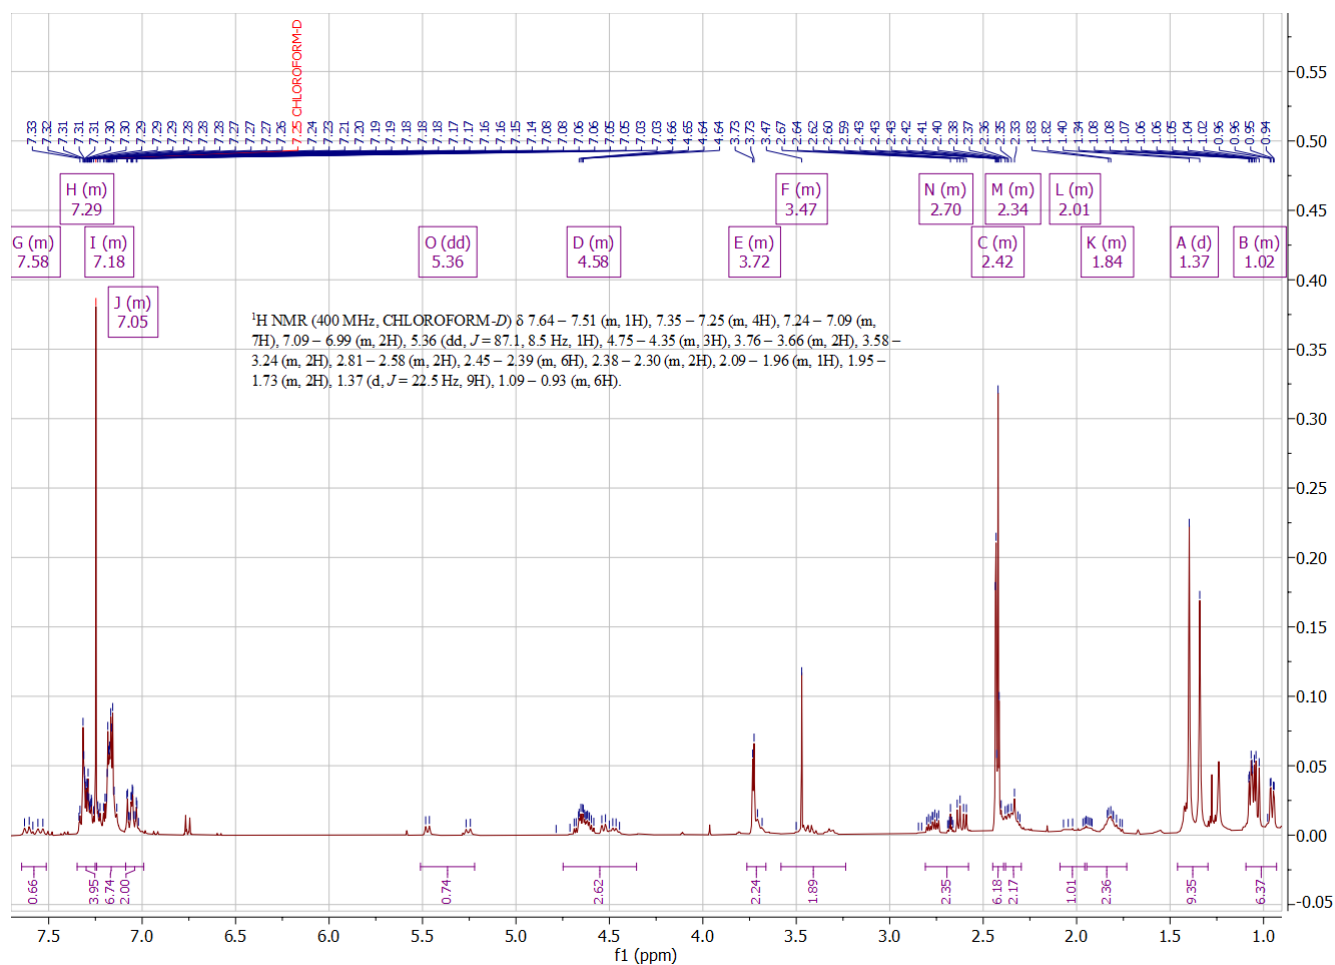

(103) Boc-L-Asp(Bzl)-L-Pro- Val<sup>P</sup>(OPh-4-SCH<sub>3</sub>)<sub>2</sub>

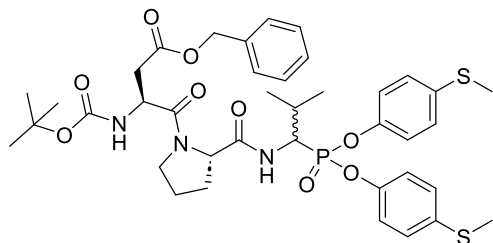

**Name:** benzyl (3S)-4-((2S)-2-((1-(bis(4-(methylthio)phenoxy)phosphoryl)-2-methylpropyl)carbamoyl)pyrrolidin-1-yl)-3-((*tert*-butoxycarbonyl)amino)-4-oxobutanoate

**<sup>31</sup>P NMR** (162 MHz, Chloroform-*d*) δ 18.58 (s, 48%), 18.19 (s, 52%).

**<sup>1</sup>H NMR** (400 MHz, Chloroform-*d*) δ 7.45 – 7.32 (m, 1H, NH), 7.32 – 7.27 (m, 3H, 3xArH), 7.22 – 7.10 (m, 8H, 8xArH), 7.06 – 6.97 (m, 2H, 2xArH), 5.26 (dd, *J* = 21.4, 9.3 Hz, 1H, NH), 5.12 – 4.85 (m, 2H, CH<sub>2</sub>), 4.85 – 4.77 (m, 1H, CHP), 4.75 – 4.62 (m, 2H, 2xCH), 3.86 – 3.69 (m, 2H, CH<sub>2</sub>), 2.97 – 2.86 (m, 1H, 0.5xCH<sub>2</sub>), 2.72 – 2.62 (m, 1H, 0.5xCH<sub>2</sub>), 2.43 – 2.38 (m, 6H, 2xSCH<sub>3</sub>), 2.40 – 2.17 (m, 2H, 0.5xCH<sub>2</sub>, CH), 2.12 – 1.81 (m, 3H, 1.5xCH<sub>2</sub>), 1.41 (d, *J* = 1.4 Hz, 9H, Boc), 1.13 – 0.93 (m, 6H, 2xCH<sub>3</sub>).

**HRMS:** C<sub>39</sub>H<sub>50</sub>N<sub>3</sub>O<sub>9</sub>PS<sub>2</sub> [M+Na]<sup>+</sup> calc. 822.2624 found 822.2603

**HPLC:** purity >99%; retention time 19.520 min

**Chromatogram**

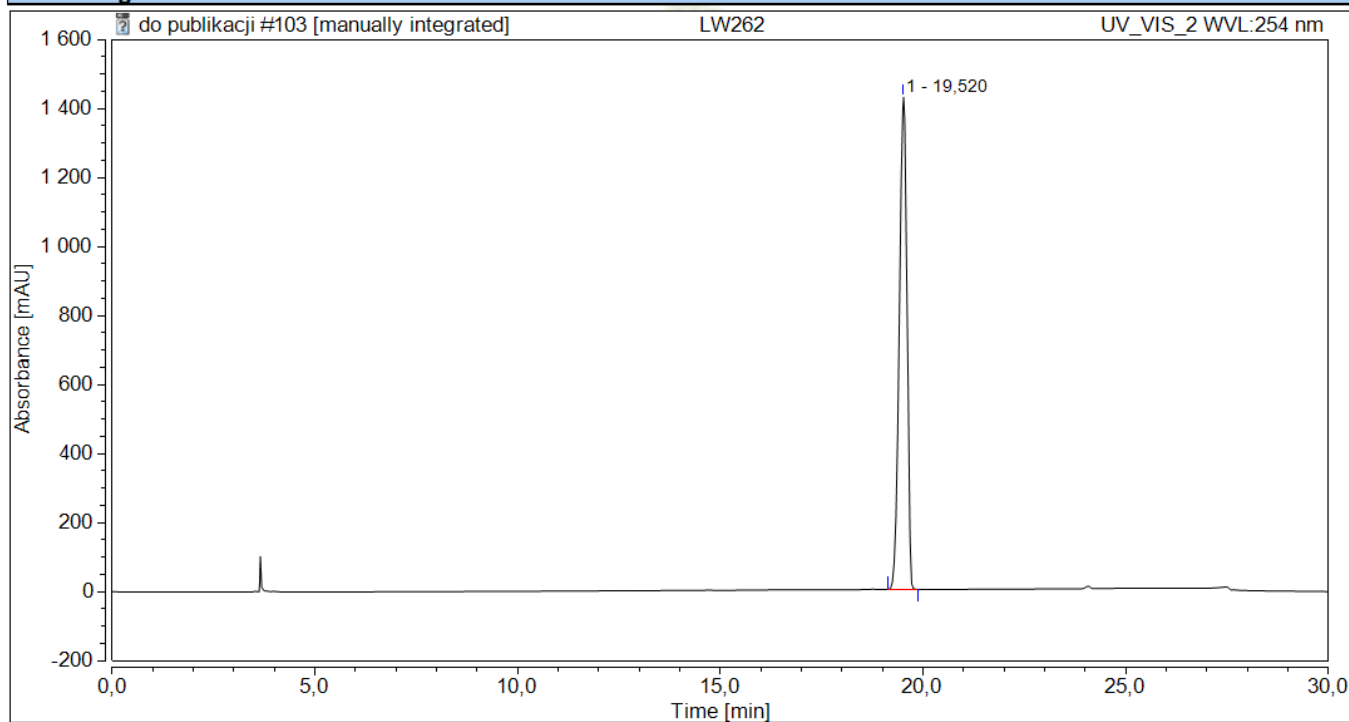

**Integration Results**

| No.           | Peak Name | Retention Time<br>min | Area<br>mAU*min | Height<br>mAU   | Relative Area<br>% | Relative Height<br>% | Amount |
|---------------|-----------|-----------------------|-----------------|-----------------|--------------------|----------------------|--------|
| 1             |           | 19,520                | 312,780         | 1425,797        | 100,00             | 100,00               | n.a.   |
| <b>Total:</b> |           |                       | <b>312,780</b>  | <b>1425,797</b> | <b>100,00</b>      | <b>100,00</b>        |        |



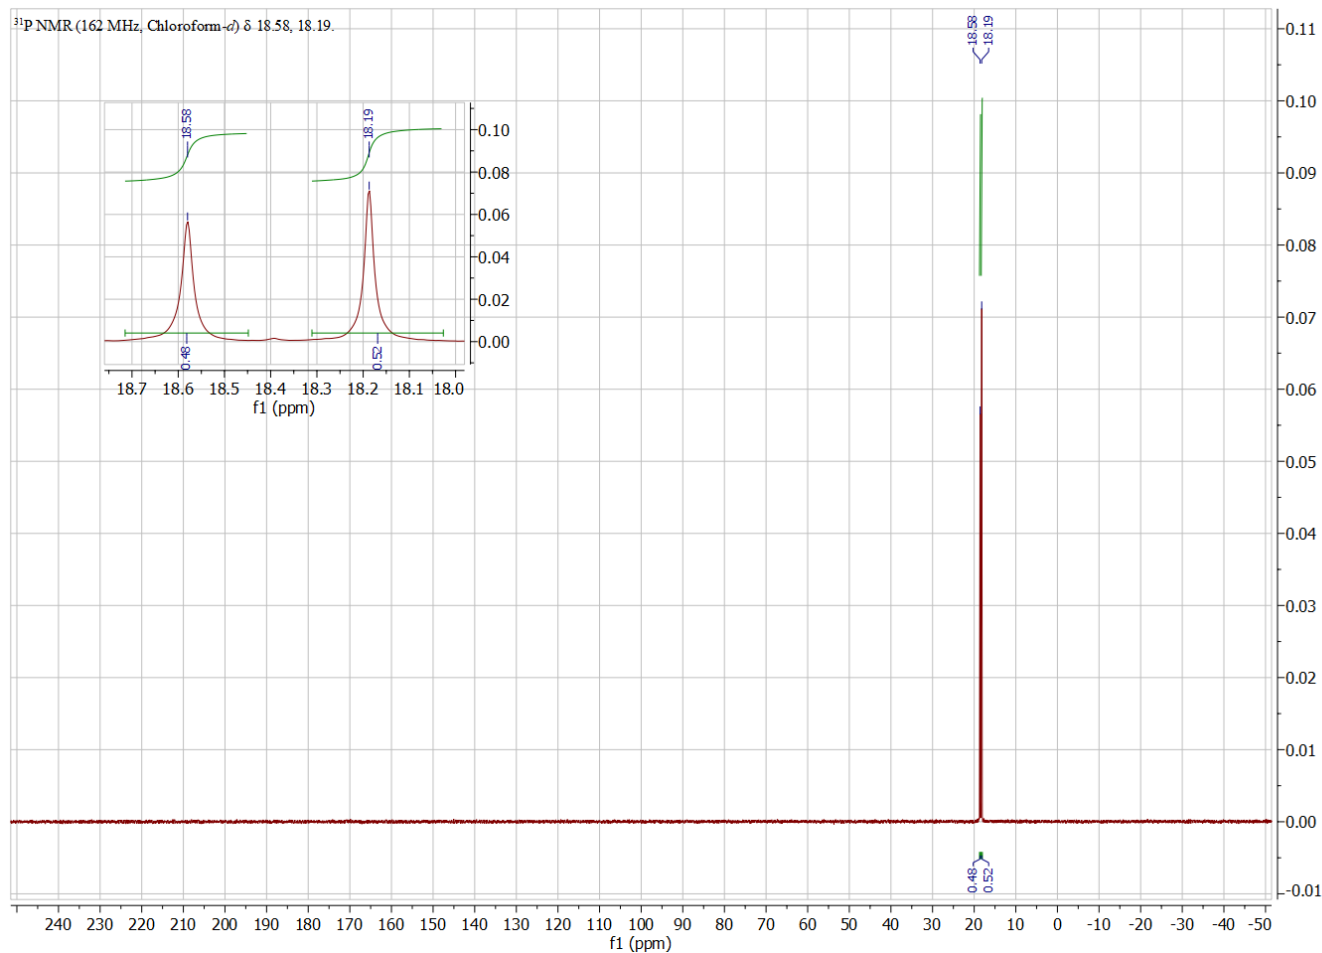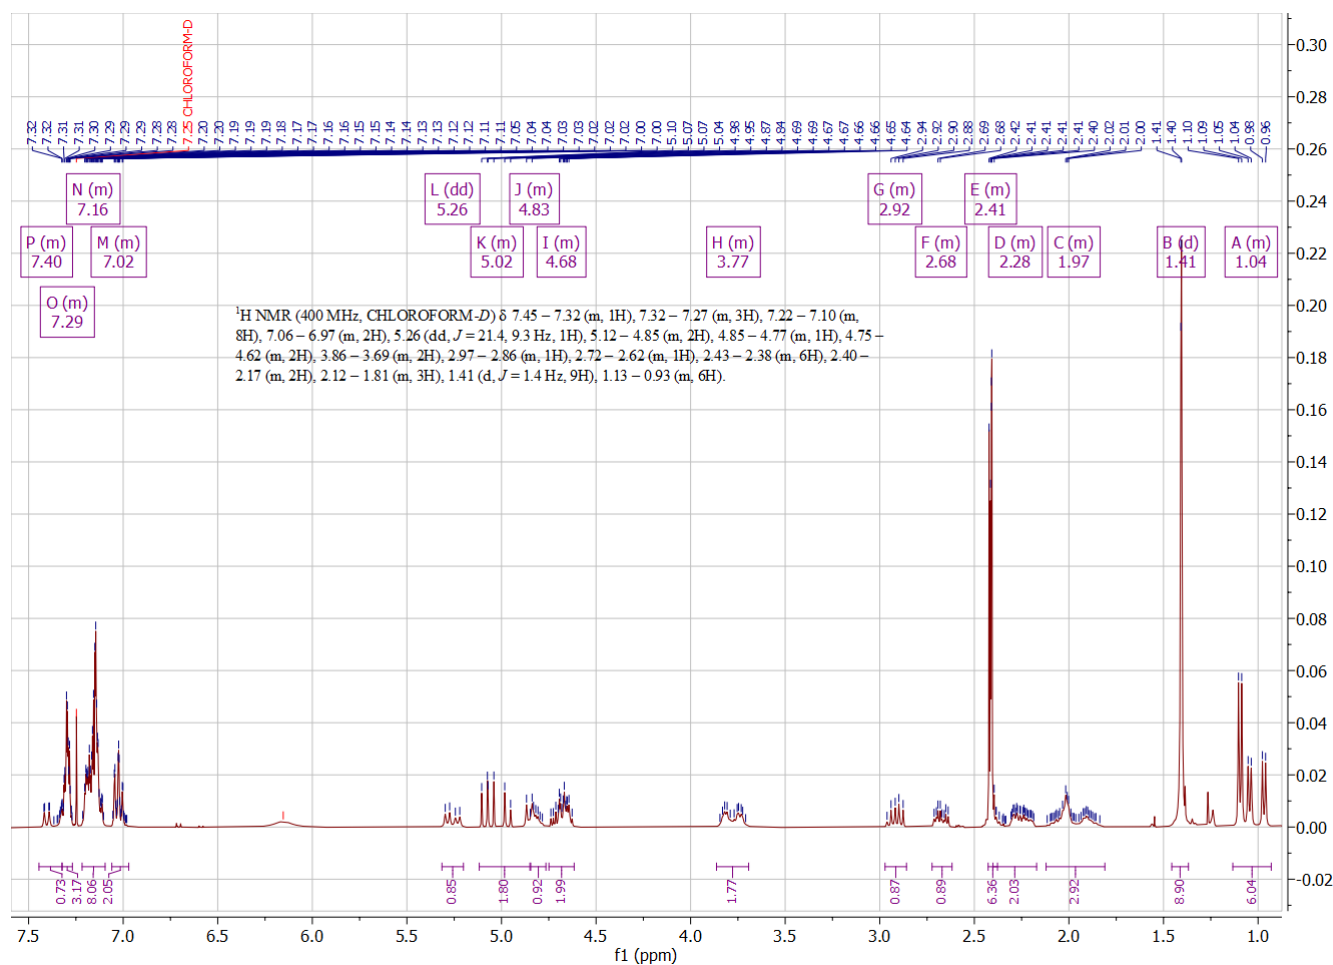

(104) Boc-D-Asp(Bzl)-L-Pro- Val<sup>P</sup>(OPh-4-SCH<sub>3</sub>)<sub>2</sub>

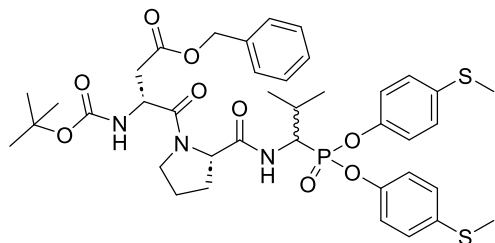

**Name:** benzyl (3R)-4-((2S)-2-((1-(bis(4-(methylthio)phenoxy)phosphoryl)-2-methylpropyl)carbamoyl)pyrrolidin-1-yl)-3-((*tert*-butoxycarbonyl)amino)-4-oxobutanoate

<sup>31</sup>P NMR (162 MHz, Chloroform-d) δ 18.78 (s, 47%) 18.24 (s, 53%).

<sup>1</sup>H NMR (400 MHz, Chloroform-d) δ 7.57 (dd, J = 131.1, 10.3 Hz, 1H, NH), 7.38 – 7.27 (m, 5H, 5xArH), 7.21 – 7.11 (m, 6H, 6xArH), 7.10 – 7.03 (m, 2H, 2xArH), 5.52 (dd, J = 127.1, 8.9 Hz, 1H, NH), 5.15 – 4.97 (m, 2H, CH<sub>2</sub>), 4.93 – 4.45 (m, 3H, CHP, 2xCH), 3.84 – 3.60 (m, 1H, 0.5xCH<sub>2</sub>), 3.59 – 3.44 (m, 1H, 0.5xCH<sub>2</sub>), 2.99 – 2.86 (m, 1H, 0.5xCH<sub>2</sub>), 2.75 – 2.64 (m, 1H, 0.5xCH<sub>2</sub>), 2.45 – 2.40 (m, 6H, 2xSCH<sub>3</sub>), 2.40 – 2.22 (m, 2H, 0.5xCH<sub>2</sub>, CH), 2.10 – 1.90 (m, 1H, 0.5xCH<sub>2</sub>), 1.90 – 1.70 (m, 2H, CH<sub>2</sub>), 1.35 (d, J = 22.4 Hz, 9H, Boc), 1.09 – 0.95 (m, 6H, 2xCH<sub>3</sub>).

**HRMS:** C<sub>39</sub>H<sub>50</sub>N<sub>3</sub>O<sub>9</sub>PS<sub>2</sub> [M+Na]<sup>+</sup> calc. 822.2624 found 822.2617

**HPLC:** purity >98%; retention time 19.503 and 19.667 min

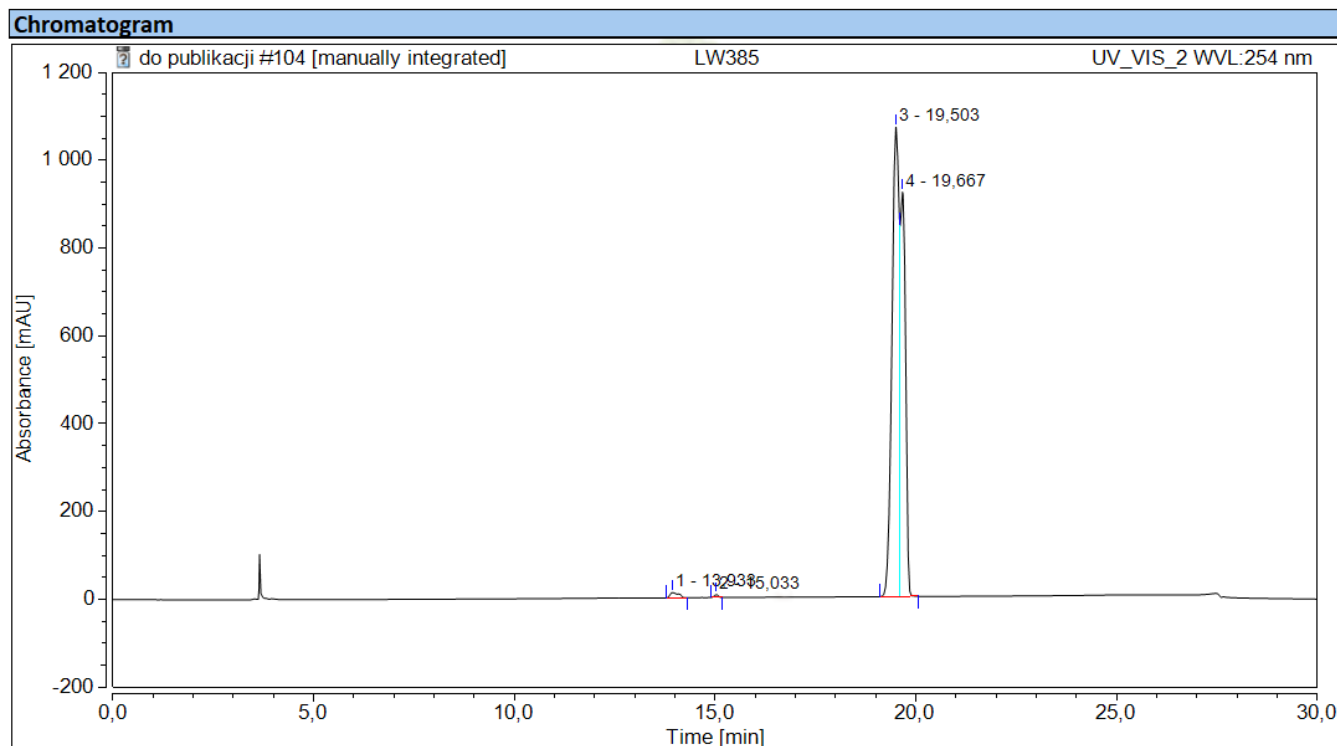

| Integration Results |           |                       |                 |               |                    |                      |                |
|---------------------|-----------|-----------------------|-----------------|---------------|--------------------|----------------------|----------------|
| No.                 | Peak Name | Retention Time<br>min | Area<br>mAU*min | Height<br>mAU | Relative Area<br>% | Relative Height<br>% | Amount<br>n.a. |
| 1                   |           | 13,933                | 3,023           | 12,309        | 0,83               | 0,61                 | n.a.           |
| 2                   |           | 15,033                | 0,779           | 6,792         | 0,21               | 0,34                 | n.a.           |
| 3                   |           | 19,503                | 217,680         | 1069,098      | 59,74              | 53,21                | n.a.           |
| 4                   |           | 19,667                | 142,872         | 921,015       | 39,21              | 45,84                | n.a.           |
| Total:              |           |                       | 364,354         | 2009,214      | 100,00             | 100,00               |                |

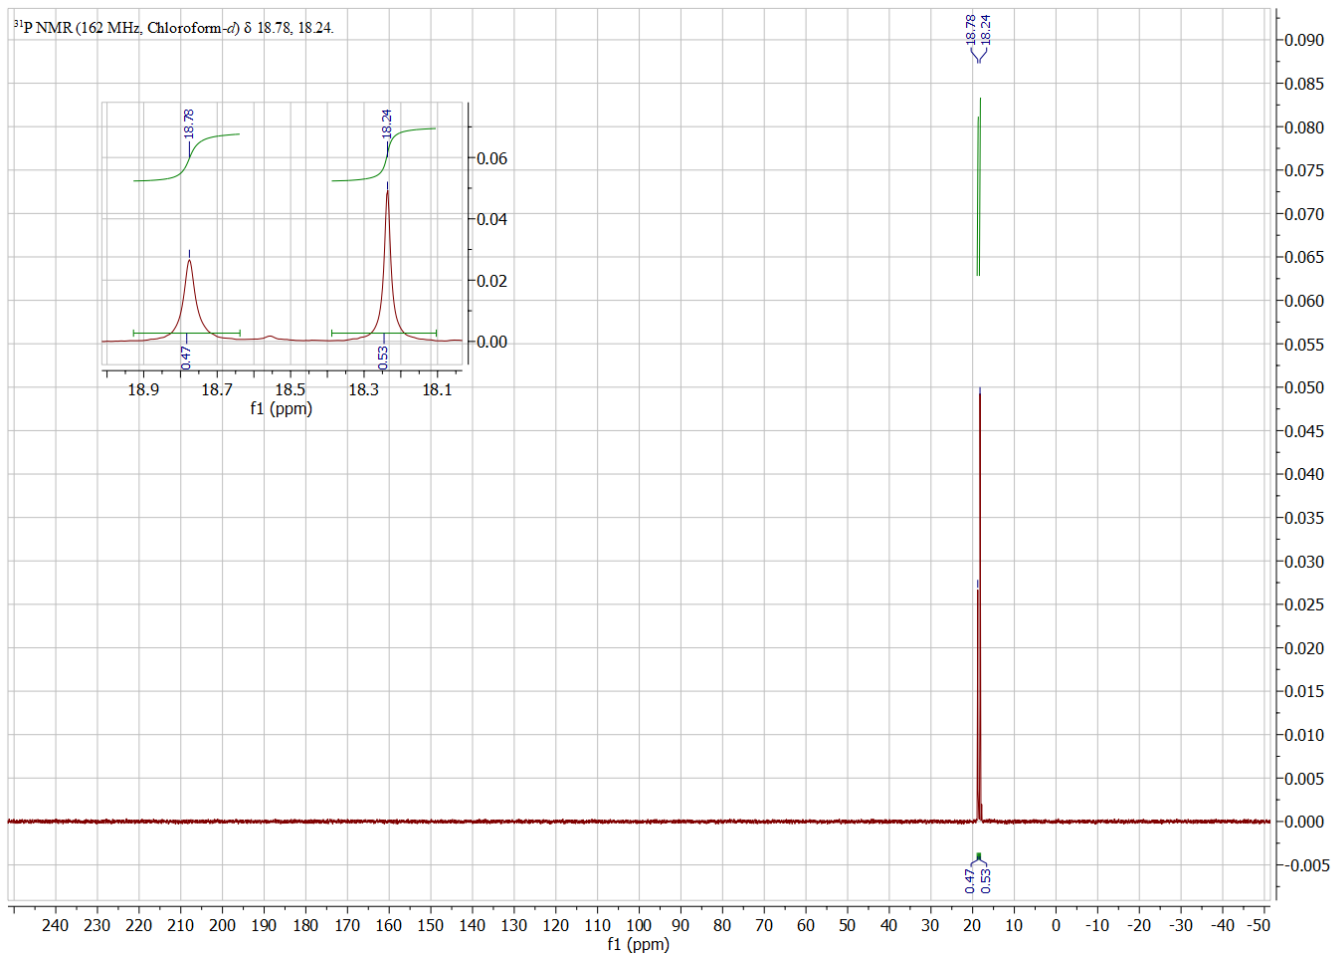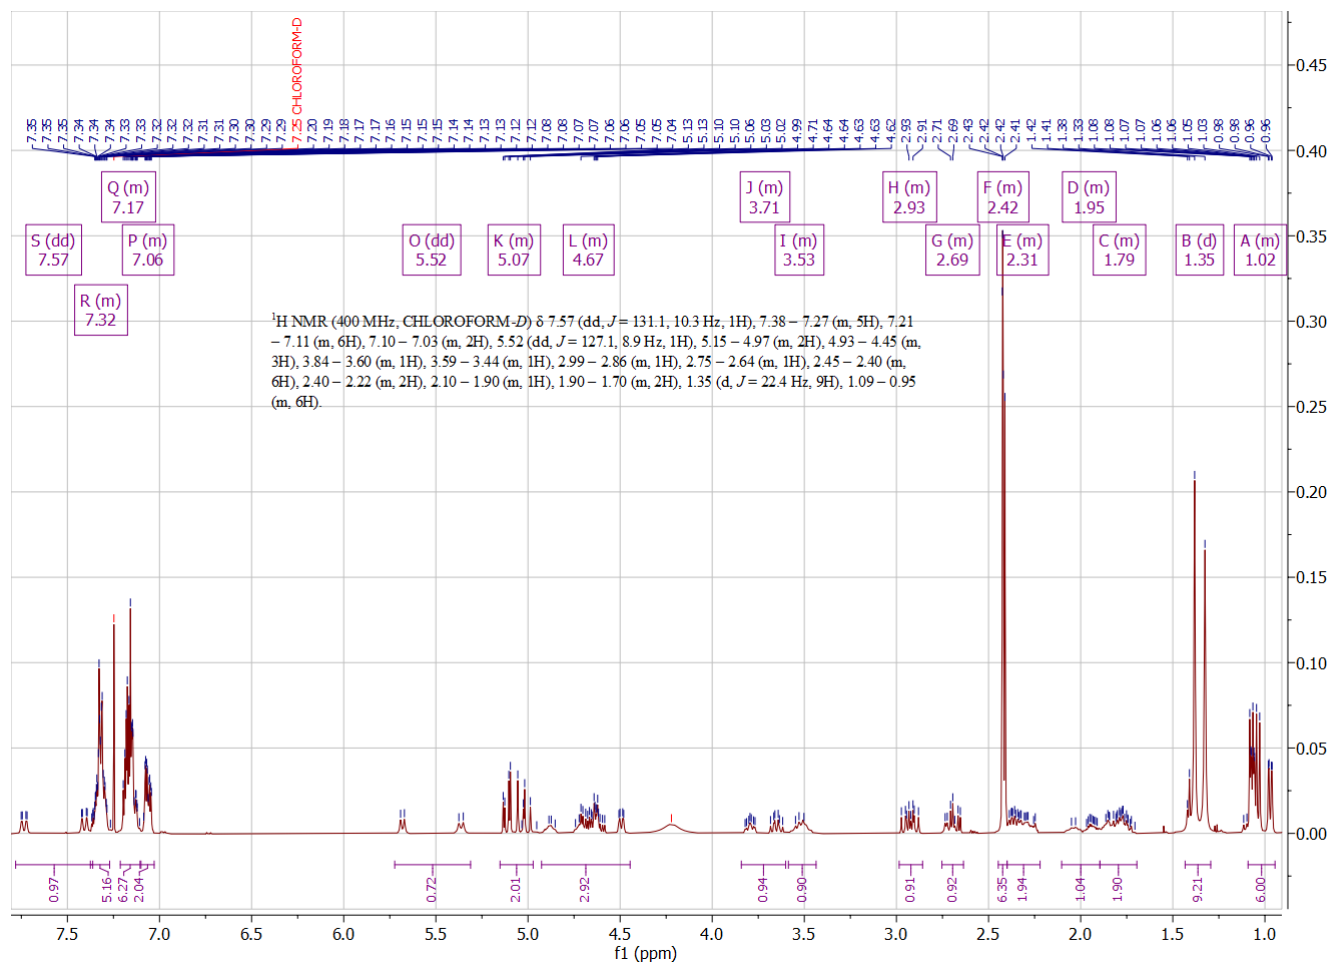

(105) Boc-L-Glu(Bzl)-L-Pro- Val<sup>P</sup>(OPh-4-SCH<sub>3</sub>)<sub>2</sub>

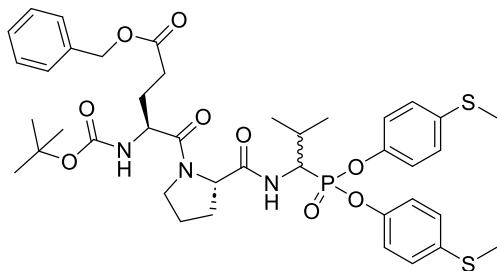

**Name:** benzyl (4S)-5-((2S)-2-((1-(bis(4-(methylthio)phenoxy)phosphoryl)-2-methylpropyl)carbamoyl)pyrrolidin-1-yl)-4-((*tert*-butoxycarbonyl)amino)-5-oxopentanoate

<sup>31</sup>P NMR (162 MHz, Chloroform-d) δ 18.26 (s, 50%), 18.06 (s, 50%).

<sup>1</sup>H NMR (400 MHz, Chloroform-d) δ 7.47 (dd, J = 36.8, 10.6 Hz, 1H, NH), 7.36 – 7.28 (m, 5H, 5xArH), 7.21 – 7.14 (m, 4H, 4xArH), 7.14 – 7.01 (m, 4H, 4xArH), 5.41 (dd, J = 20.2, 7.7 Hz, 1H, NH), 5.11 (s, 2H, CH<sub>2</sub>), 4.76 – 4.64 (m, 1H, CHP), 4.60 – 4.39 (m, 2H, 2xCH), 3.79 – 3.45 (m, 2H, CH<sub>2</sub>), 2.59 – 2.44 (m, 2H, CH<sub>2</sub>), 2.44 – 2.40 (m, 6H, 2xSCH<sub>3</sub>), 2.40 – 2.30 (m, 1H, CH), 2.27 – 2.15 (m, 1H, 0.5xCH<sub>2</sub>), 2.15 – 1.88 (m, 3H, 1.5xCH<sub>2</sub>), 1.88 – 1.75 (m, 2H, CH<sub>2</sub>), 1.36 (d, J = 16.4 Hz, 9H, Boc), 1.12 – 0.93 (m, 6H, 2xCH<sub>3</sub>).

**HRMS:** C<sub>40</sub>H<sub>52</sub>N<sub>3</sub>O<sub>9</sub>PS<sub>2</sub> [M+Na]<sup>+</sup> calc. 836.2780 found 836.2769

**HPLC:** purity >99%; retention time 19.603 min

**Chromatogram**

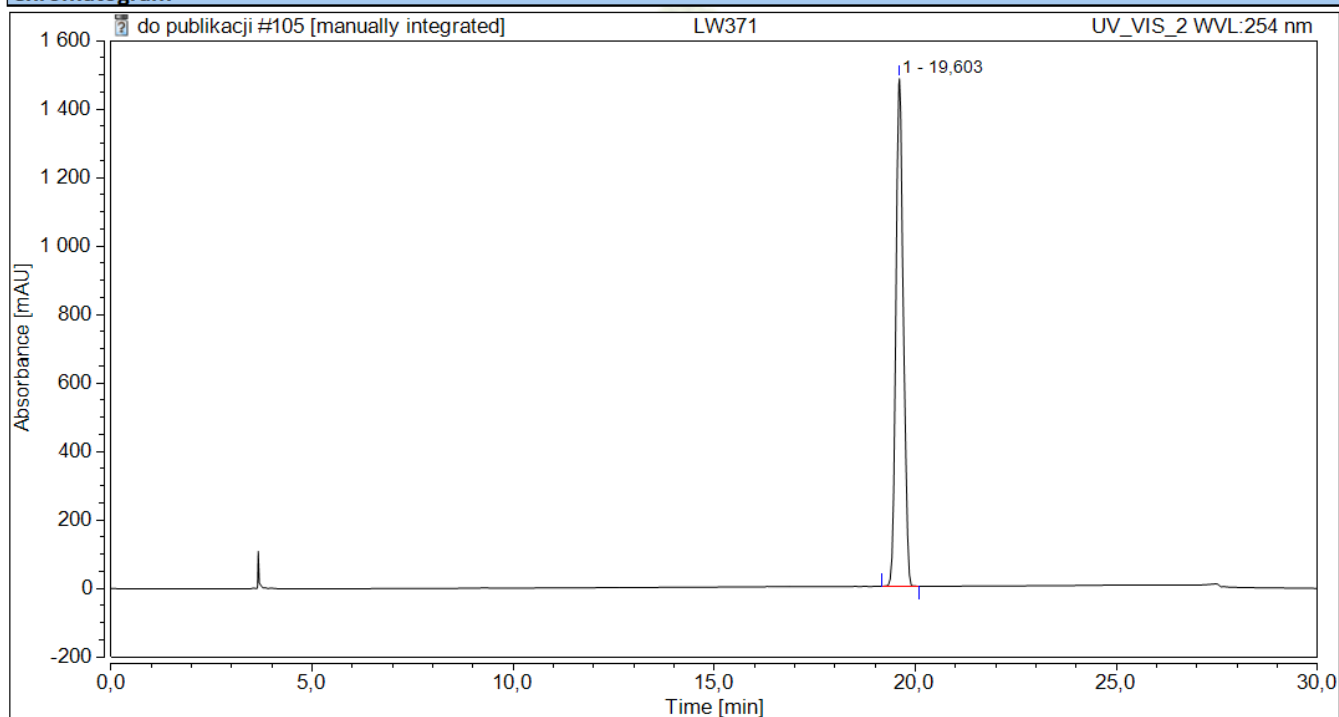

**Integration Results**

| No.           | Peak Name | Retention Time<br>min | Area<br>mAU*min | Height<br>mAU   | Relative Area<br>% | Relative Height<br>% | Amount<br>n.a. |
|---------------|-----------|-----------------------|-----------------|-----------------|--------------------|----------------------|----------------|
| 1             |           | 19,603                | 316,657         | 1482,385        | 100,00             | 100,00               | n.a.           |
| <b>Total:</b> |           |                       | <b>316,657</b>  | <b>1482,385</b> | <b>100,00</b>      | <b>100,00</b>        |                |

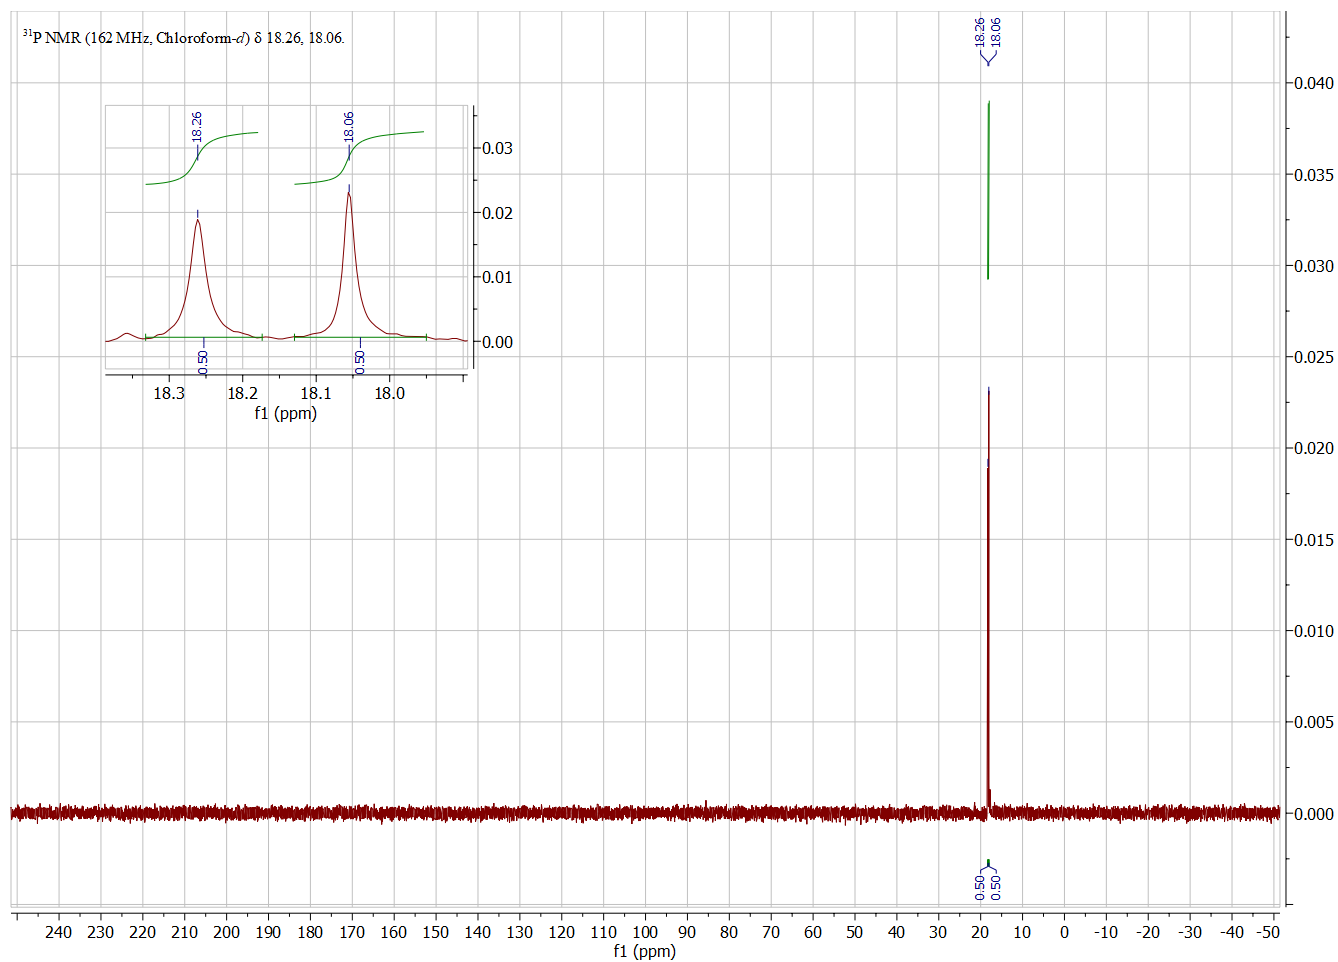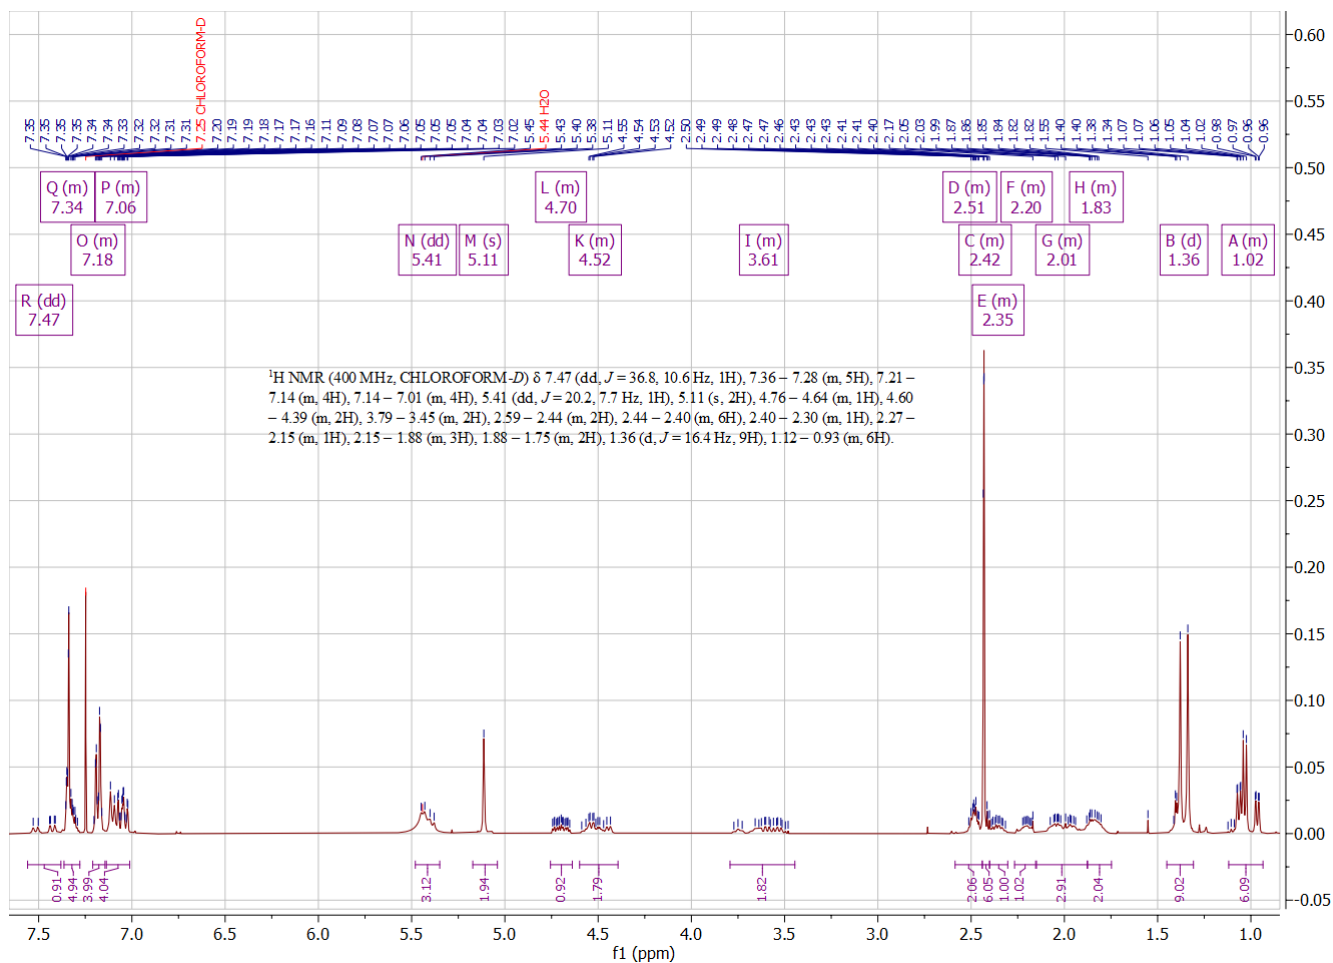

**(106) Boc-L-His(Bzl)-L-Pro-Val<sup>P</sup>(OPh-4-SCH<sub>3</sub>)<sub>2</sub>**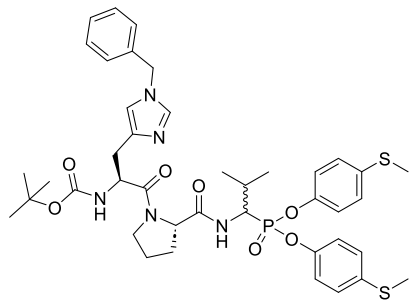

**Name:** *tert*-butyl ((2*S*)-3-(1-benzyl-1*H*-imidazol-4-yl)-1-((2*S*)-2-((1-(bis(4-(methylthio)phenoxy)phosphoryl)-2-methylpropyl)carbamoyl)pyrrolidin-1-yl)-1-oxopropan-2-yl)carbamate

<sup>31</sup>P NMR (162 MHz, Chloroform-*d*) δ 18.55 (s, 68%), 18.05 (s, 32%).

<sup>1</sup>H NMR (400 MHz, Chloroform-*d*) δ 7.43 – 7.27 (m, 4H, 3xArH, NH), 7.23 – 6.90 (m, 12H, 10xArH, 2xCH), 5.72 (dd, *J* = 16.9, 8.2 Hz, 1H, NH), 5.11 (d, *J* = 35.9 Hz, 2H, CH<sub>2</sub>), 4.78 – 4.40 (m, 3H, CHP, 2xCH), 3.68 – 3.42 (m, 2H, CH<sub>2</sub>), 3.18 – 2.68 (m, 2H, CH<sub>2</sub>), 2.47 – 2.37 (m, 8H, 2xSCH<sub>3</sub>, CH<sub>2</sub>), 2.25 – 2.15 (m, 1H, CH), 2.03 – 1.83 (m, 3H, 1.5xCH<sub>2</sub>), 1.32 (d, *J* = 6.5 Hz, 9H, Boc), 1.12 – 1.00 (m, 6H, 2xCH<sub>3</sub>).

**HRMS:** C<sub>41</sub>H<sub>52</sub>N<sub>5</sub>O<sub>7</sub>PS<sub>2</sub> [M+Na]<sup>+</sup> calc. 844.2943 found 844.2914

**HPLC:** purity >99%; retention time 14.860 and 15.187 min

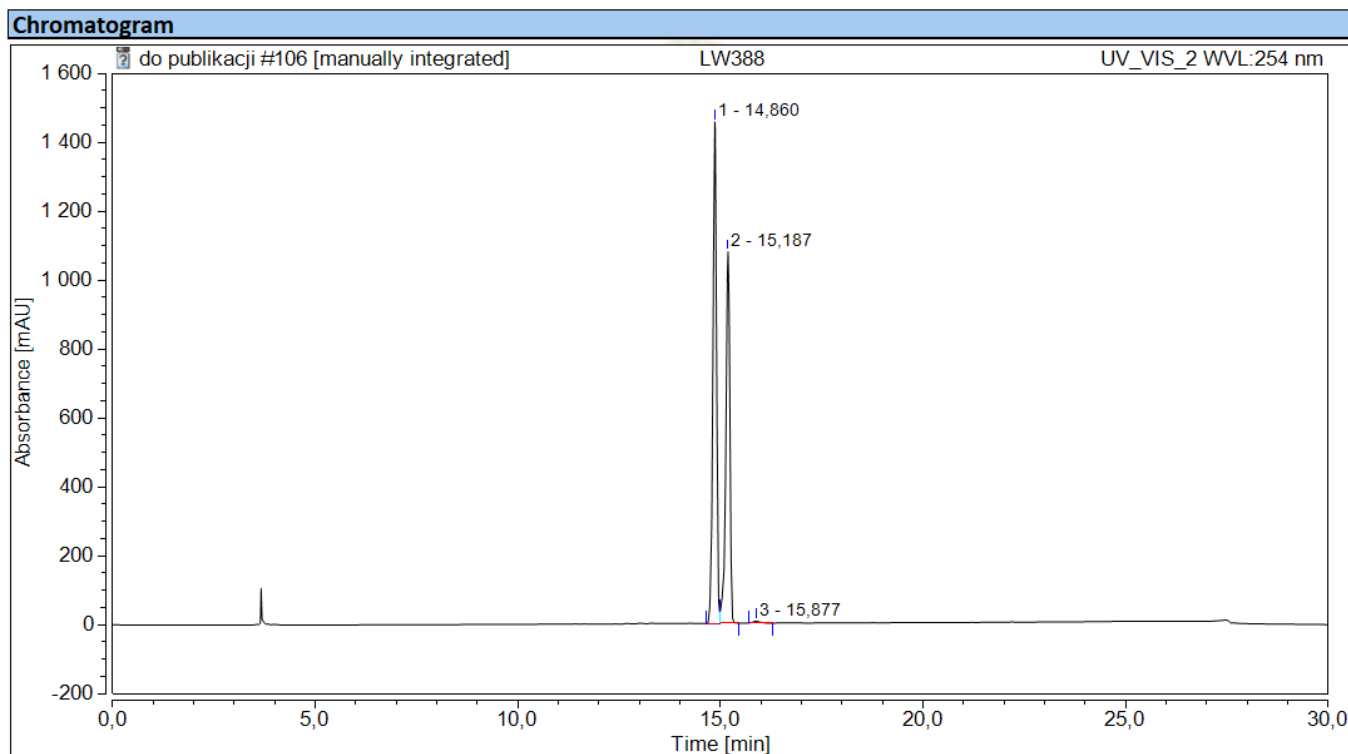

| Integration Results |           |                    |                |                 |                 |                   |             |
|---------------------|-----------|--------------------|----------------|-----------------|-----------------|-------------------|-------------|
| No.                 | Peak Name | Retention Time min | Area mAU*min   | Height mAU      | Relative Area % | Relative Height % | Amount n.a. |
| 1                   |           | 14,860             | 151,070        | 1455,037        | 54,65           | 57,33             | n.a.        |
| 2                   |           | 15,187             | 124,343        | 1077,908        | 44,98           | 42,47             | n.a.        |
| 3                   |           | 15,877             | 1,032          | 5,198           | 0,37            | 0,20              | n.a.        |
| <b>Total:</b>       |           |                    | <b>276,446</b> | <b>2538,143</b> | <b>100,00</b>   | <b>100,00</b>     |             |

$^{31}\text{P}$  NMR (162 MHz, Chloroform- $d$ )  $\delta$  18.55, 18.05.

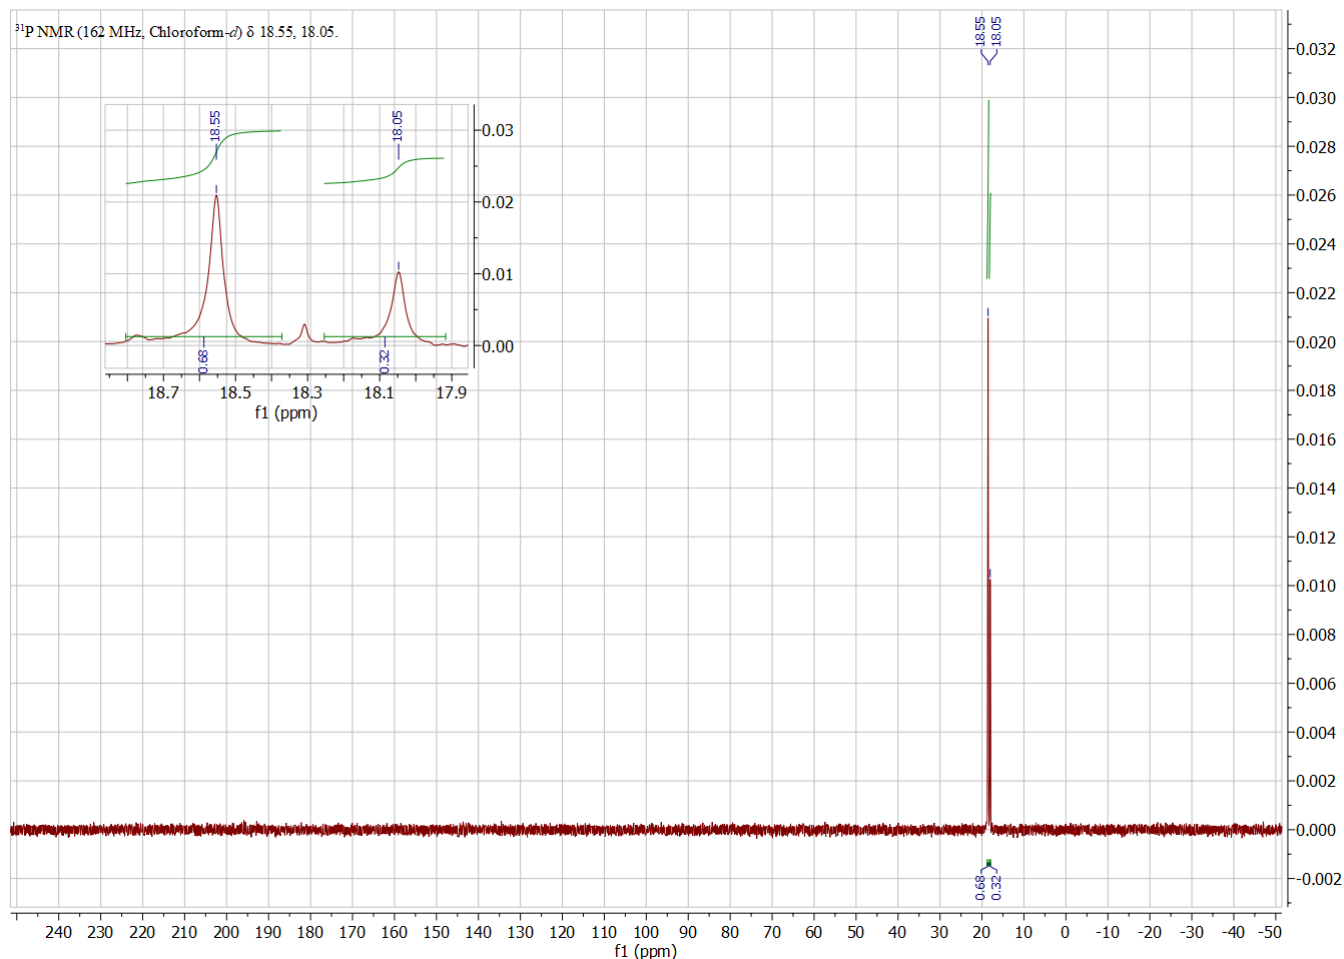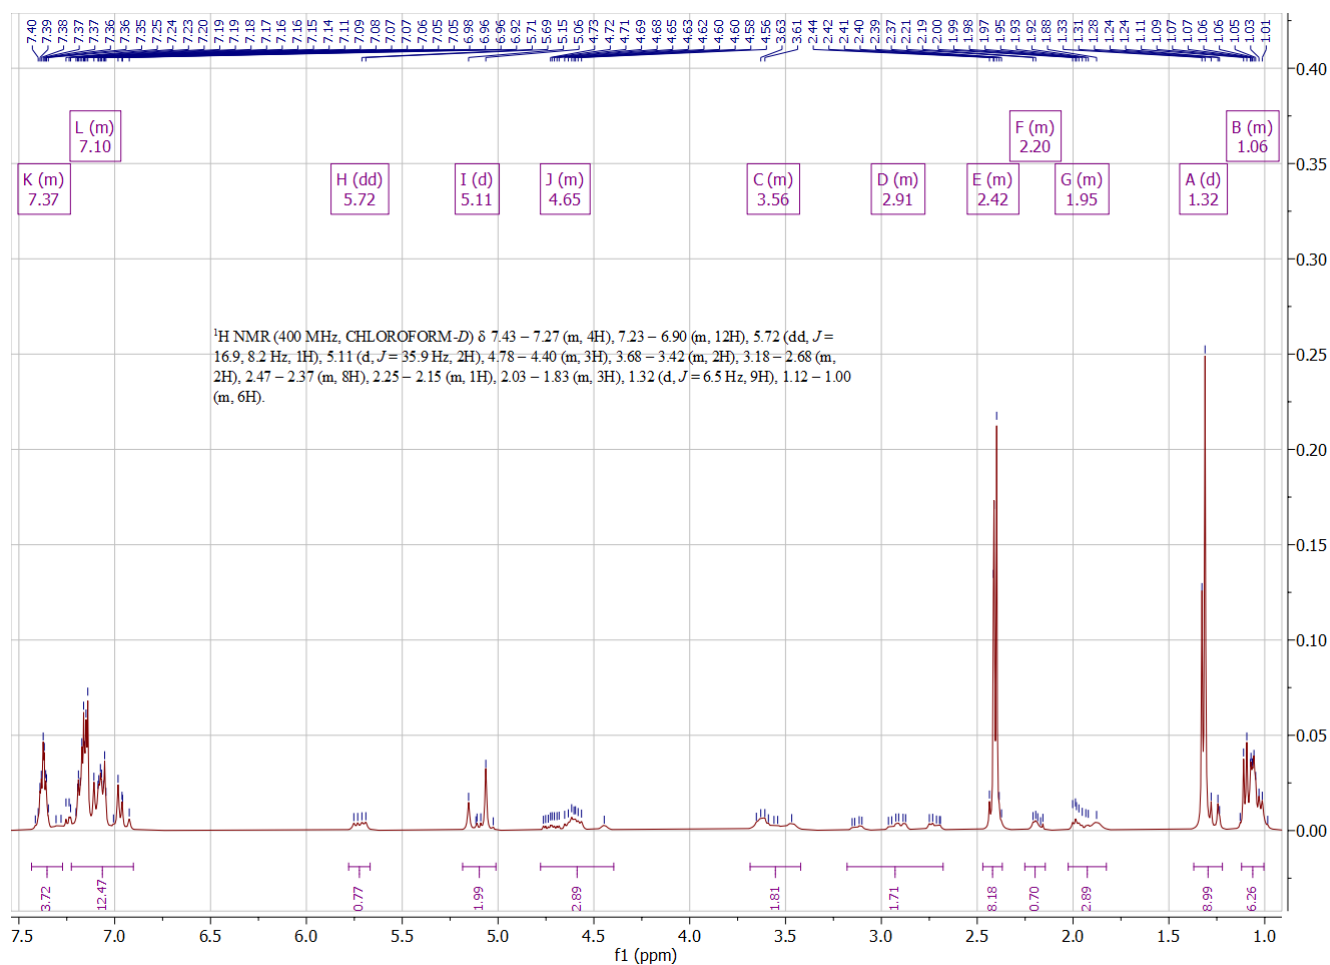

(107) Boc-L-Orn(Z)-L-Pro-Val<sup>P</sup>(OPh-4-SCH<sub>3</sub>)<sub>2</sub>

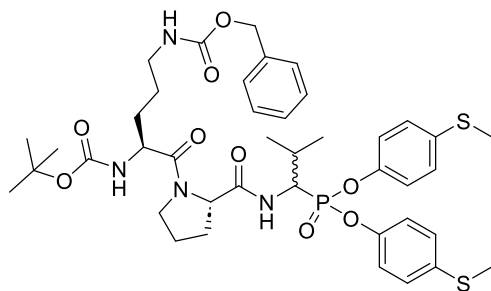

**Name:** benzyl *tert*-butyl ((4*S*)-5-((2*S*)-2-((1-(bis(4-(methylthio)phenoxy)phosphoryl)-2-methylpropyl)carbamoyl)pyrrolidin-1-yl)-5-oxopentane-1,4-diyl)dicarbamate

<sup>31</sup>P NMR (162 MHz, Chloroform-*d*) δ 17.90 (s, 48%), 17.73 (s, 52%).

<sup>1</sup>H NMR (400 MHz, Chloroform-*d*) δ 7.51 – 7.25 (m, 6H, 5xArH, NH), 7.23 – 6.91 (m, 8H, 8xArH), 5.32 (dd, *J* = 50.4, 8.6 Hz, 1H, NH), 5.17 – 4.99 (m, 2H, CH<sub>2</sub>), 4.80 – 4.60 (m, 2H, CHP, NH), 4.55 – 4.44 (m, 1H, CH), 4.44 – 4.31 (m, 1H, CH), 3.75 – 3.29 (m, 2H, CH<sub>2</sub>), 3.26 – 2.88 (m, 2H, CH<sub>2</sub>), 2.47 – 2.38 (m, 7H, 2xSCH<sub>3</sub>, CH), 2.38 – 1.81 (m, 4H, 2xCH<sub>2</sub>), 1.78 – 1.43 (m, 3H, 1.5xCH<sub>2</sub>), 1.41 (d, *J* = 2.2 Hz, 9H, Boc), 1.39 – 1.32 (m, 1H, 0.5xCH<sub>2</sub>), 1.12 – 0.94 (m, 6H, 2xCH<sub>3</sub>).

**HRMS:** C<sub>41</sub>H<sub>55</sub>N<sub>4</sub>O<sub>9</sub>PS<sub>2</sub> [M+Na]<sup>+</sup> calc. 865.3046 found 865.3028

**HPLC:** purity >99%; retention time 18.633 and 18.970 min

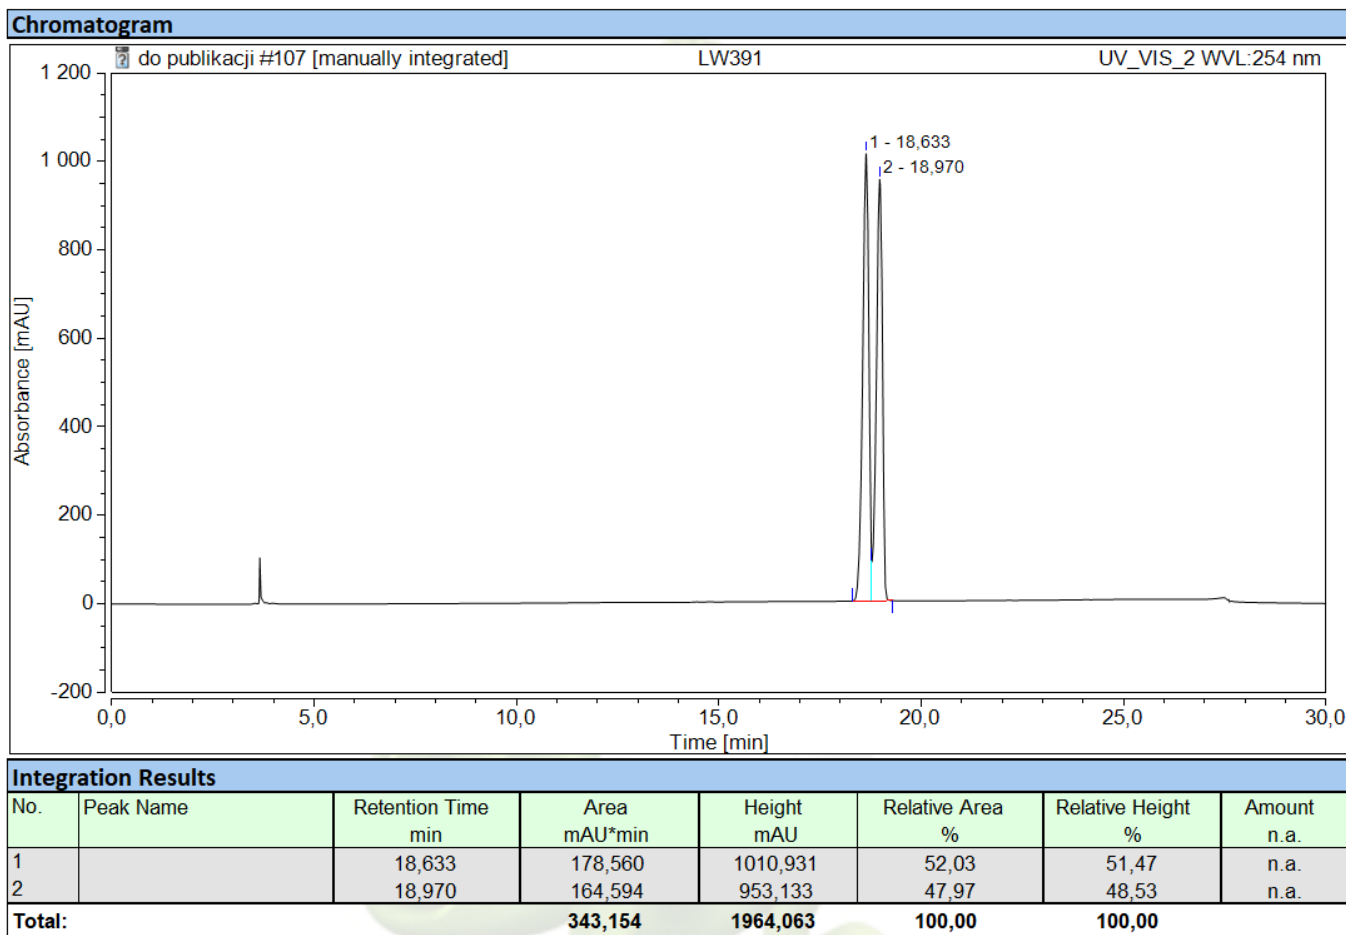



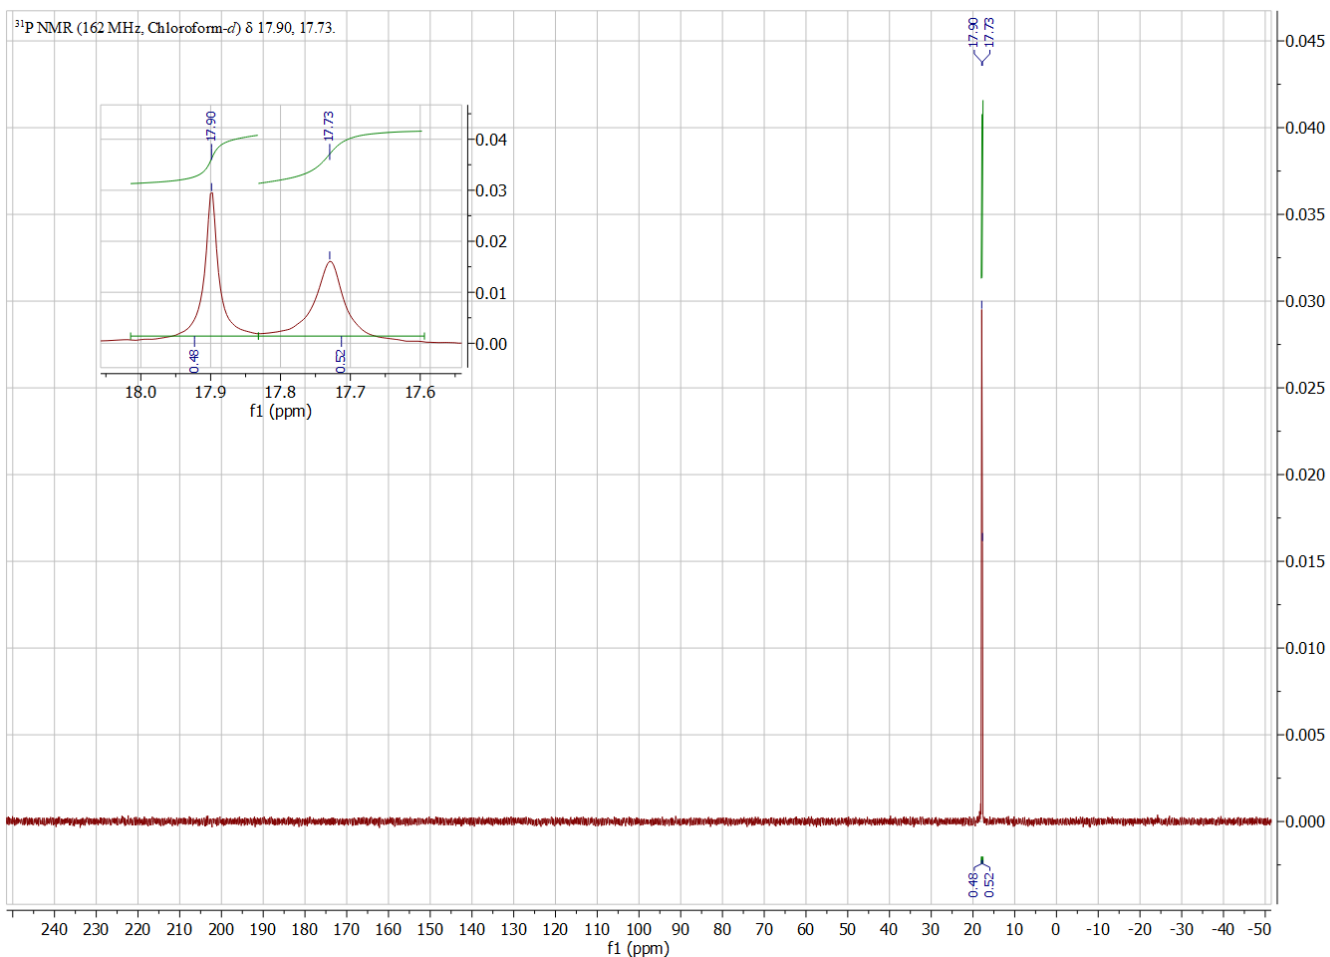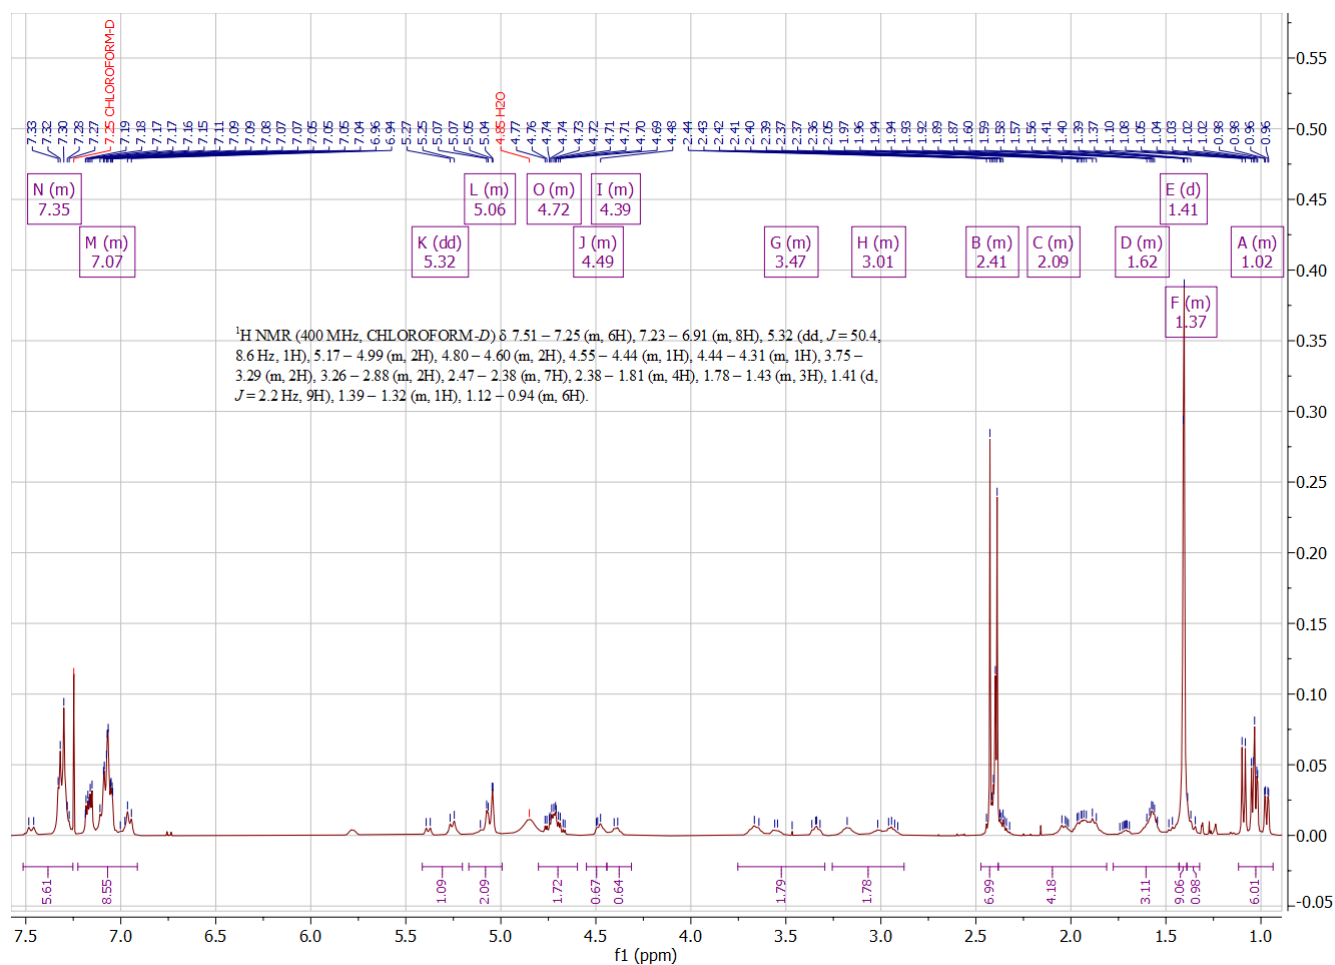

(108) Boc-D-Orn(Z)-L-Pro-Val<sup>P</sup>(OPh-4-SCH<sub>3</sub>)<sub>2</sub>

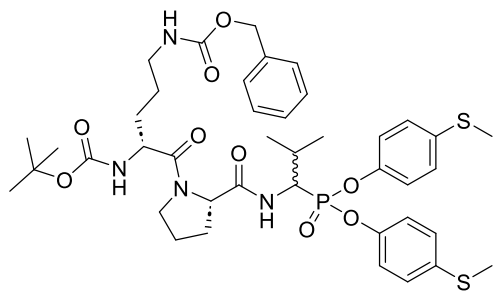

**Name:** benzyl *tert*-butyl ((4*R*)-5-((2*S*)-2-((1-(bis(4-(methylthio)phenoxy)phosphoryl)-2-methylpropyl)carbamoyl)pyrrolidin-1-yl)-5-oxopentane-1,4-diyl)dicarbamate

**<sup>31</sup>P NMR** (162 MHz, Chloroform-*d*) δ 18.51 (s, 52%), 18.19 (s, 48%).

**<sup>1</sup>H NMR** (400 MHz, Chloroform-*d*) δ 7.52 (dd, *J* = 29.9, 9.4 Hz, 1H, NH), 7.40 – 7.26 (m, 5H, 5xArH), 7.23 – 7.00 (m, 8H, 8xArH), 5.34 (dd, *J* = 29.7, 8.4 Hz, 1H, NH), 5.17 – 5.01 (m, 2H, CH<sub>2</sub>), 4.98 – 4.87 (m, 1H, NH), 4.74 – 4.62 (m, 1H, CHP), 4.62 – 4.49 (m, 1H, CH), 4.50 – 4.34 (m, 1H, CH), 3.83 – 3.32 (m, 2H, CH<sub>2</sub>), 3.27 – 3.13 (m, 2H, CH<sub>2</sub>), 2.43 (d, *J* = 3.3 Hz, 6H, 2xSCH<sub>3</sub>), 2.41 – 2.02 (m, 3H, CH<sub>2</sub>, CH), 2.02 – 1.66 (m, 3H, 1.5xCH<sub>2</sub>), 1.66 – 1.46 (m, 3H, 1.5xCH<sub>2</sub>), 1.36 (d, *J* = 19.7 Hz, 9H, Boc), 1.13 – 0.92 (m, 6H, 2xCH<sub>3</sub>).

**HRMS:** C<sub>41</sub>H<sub>55</sub>N<sub>4</sub>O<sub>9</sub>PS<sub>2</sub> [M+Na]<sup>+</sup> calc. 865.3046 found 865.3023

**HPLC:** purity >99%; retention time 18.770 min

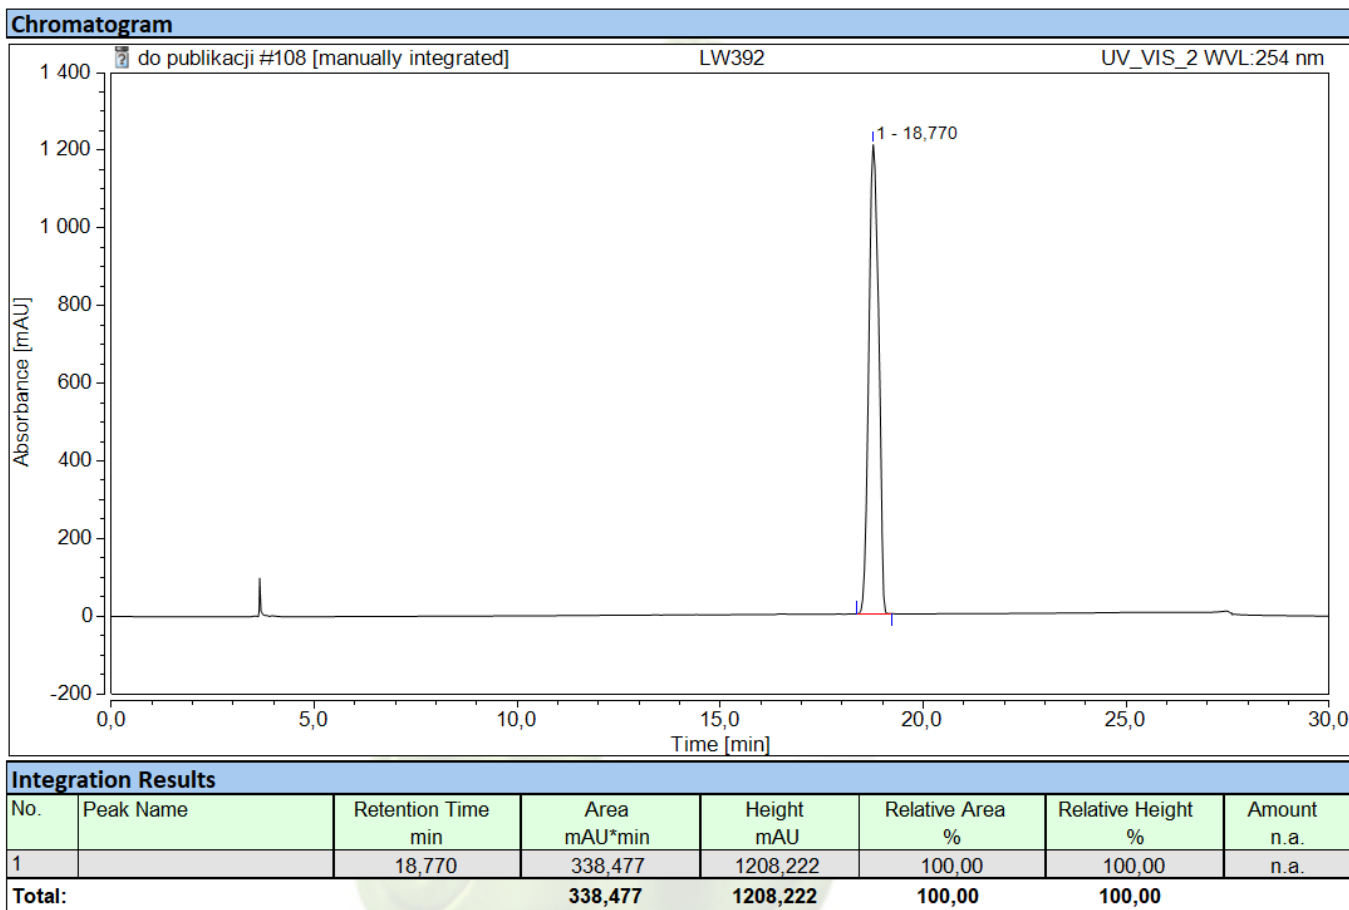

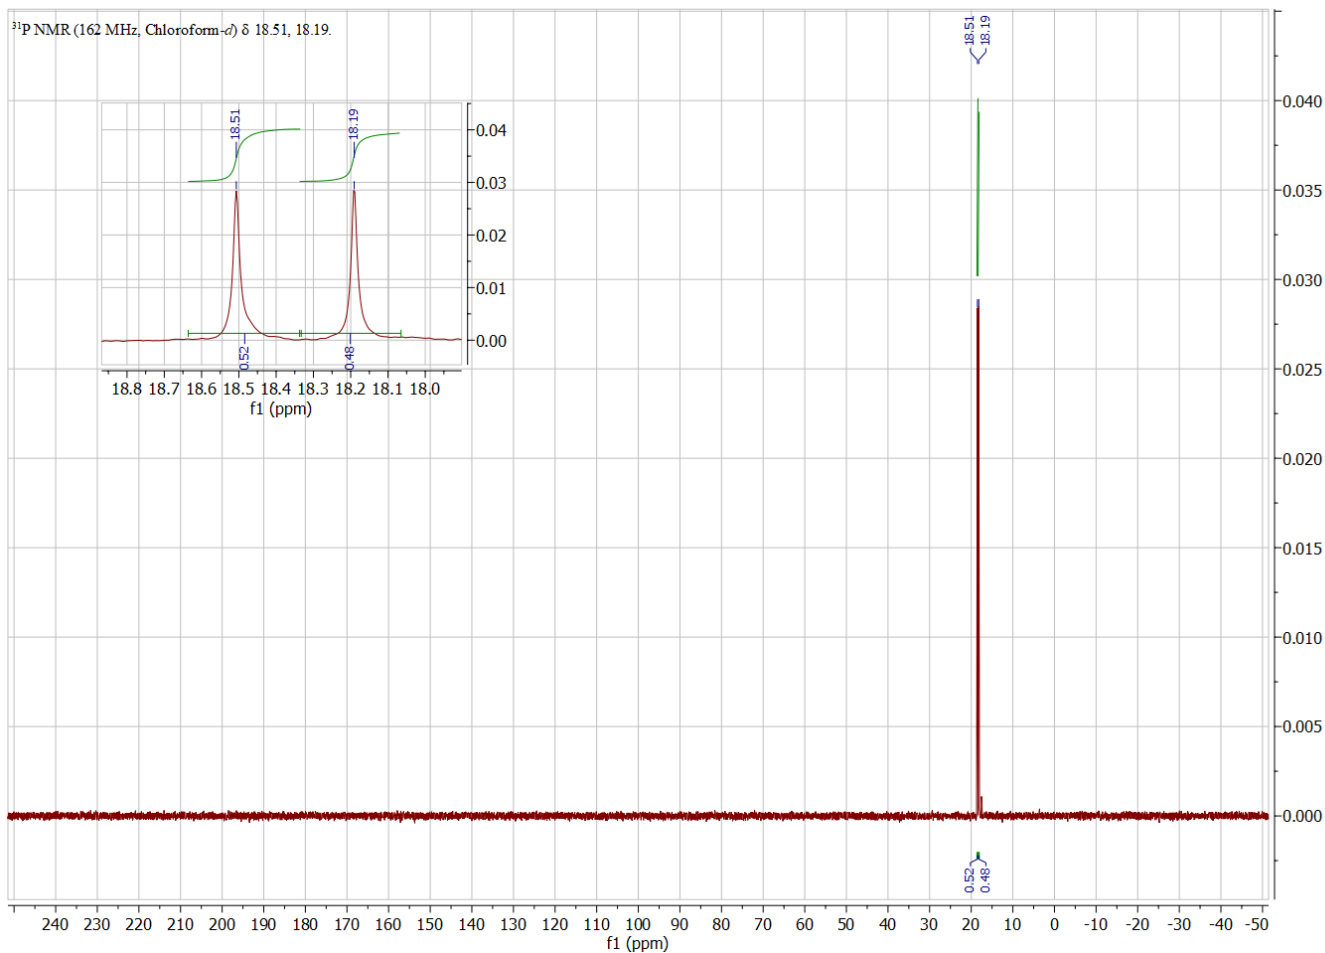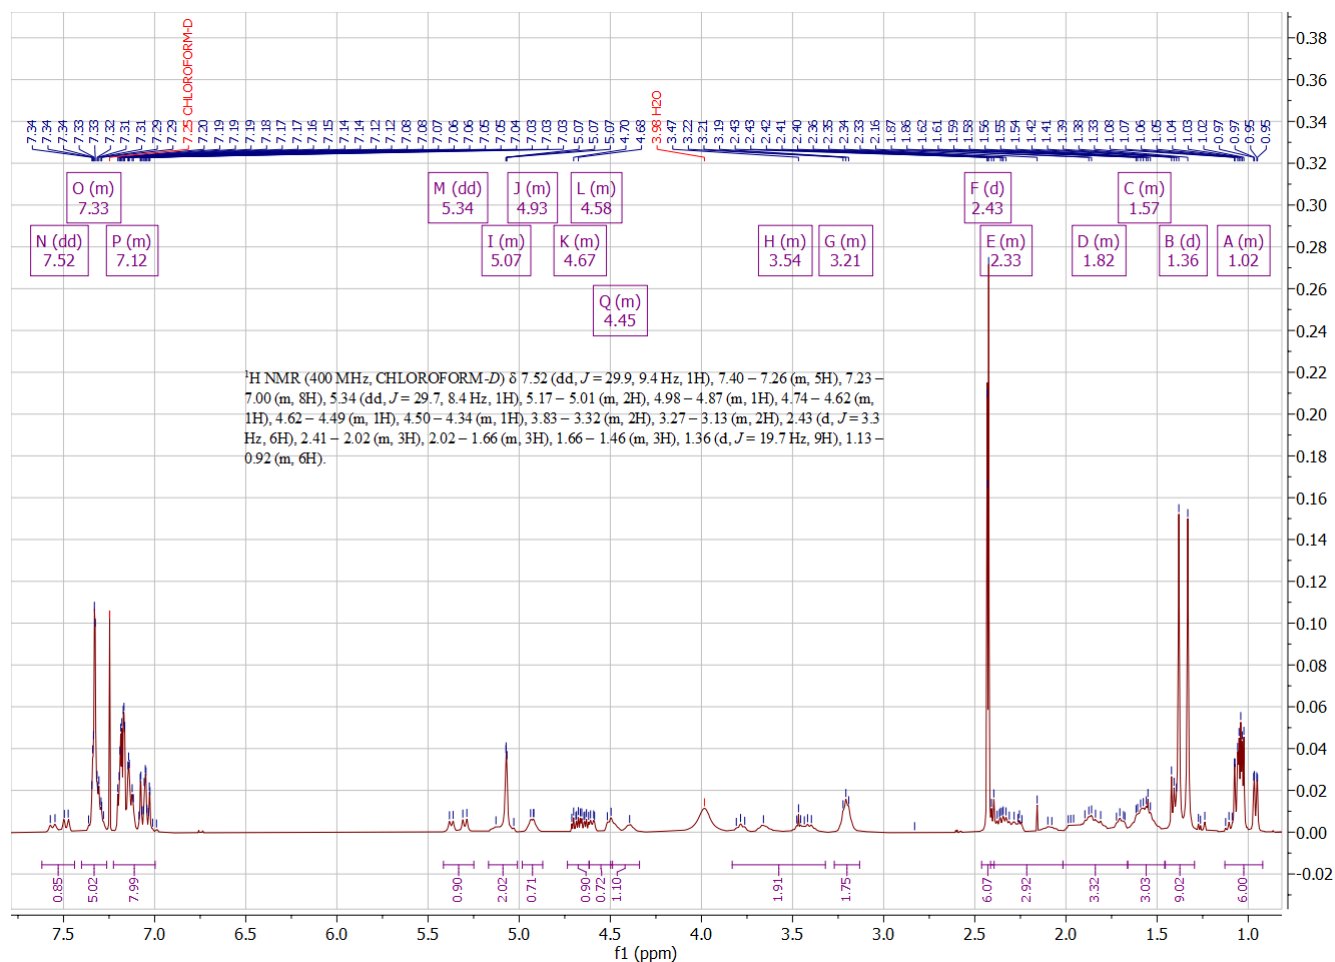

(109) Boc-L-Lys(Z)-L-Pro-Val<sup>P</sup>(OPh-4-SCH<sub>3</sub>)<sub>2</sub>

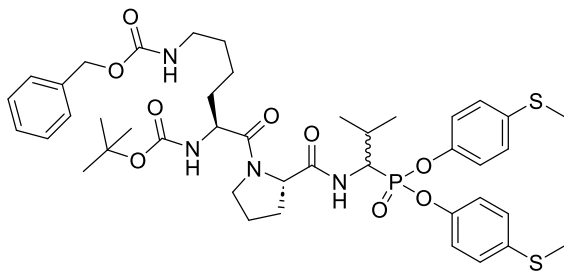

**Name:** benzyl *tert*-butyl ((5*S*)-6-((2*S*)-2-((1-(bis(4-(methylthio)phenoxy)phosphoryl)-2-methylpropyl)carbamoyl)pyrrolidin-1-yl)-6-oxohexane-1,5-diyl)dicarbamate

<sup>31</sup>P NMR (162 MHz, Chloroform-*d*) δ 18.25 (s, 54%), 18.10 (s, 46%).

<sup>1</sup>H NMR (400 MHz, Chloroform-*d*) δ 7.50 – 7.25 (m, 6H, 5×ArH, NH), 7.20 – 6.94 (m, 8H, 8×ArH), 5.45 – 5.20 (m, 1H, NH), 5.12 – 5.03 (m, 2H, CH<sub>2</sub>), 4.95 – 4.64 (m, 2H, CHP, NH), 4.58 – 3.95 (m, 2H, 2×CH), 3.73 – 3.34 (m, 2H, CH<sub>2</sub>), 3.24 – 2.89 (m, 2H, CH<sub>2</sub>), 2.46 – 2.40 (m, 6H, 2×SCH<sub>3</sub>), 2.40 – 2.19 (m, 2H, 0.5×CH<sub>2</sub>, CH), 2.20 – 2.09 (m, 1H, 0.5×CH<sub>2</sub>), 2.09 – 1.70 (m, 4H, 2×CH<sub>2</sub>), 1.70 – 1.47 (m, 2H, CH<sub>2</sub>), 1.39 (d, *J* = 7.0 Hz, 9H, Boc), 1.32 – 1.24 (m, 2H, CH<sub>2</sub>), 1.10 – 0.87 (m, 6H, 2×CH<sub>3</sub>).

**HRMS:** C<sub>42</sub>H<sub>57</sub>N<sub>4</sub>O<sub>9</sub>PS<sub>2</sub> [M+Na]<sup>+</sup> calc. 879.3202 found 879.3179

**HPLC:** purity >99%; retention time 18.930 and 19.167 min

**Chromatogram**

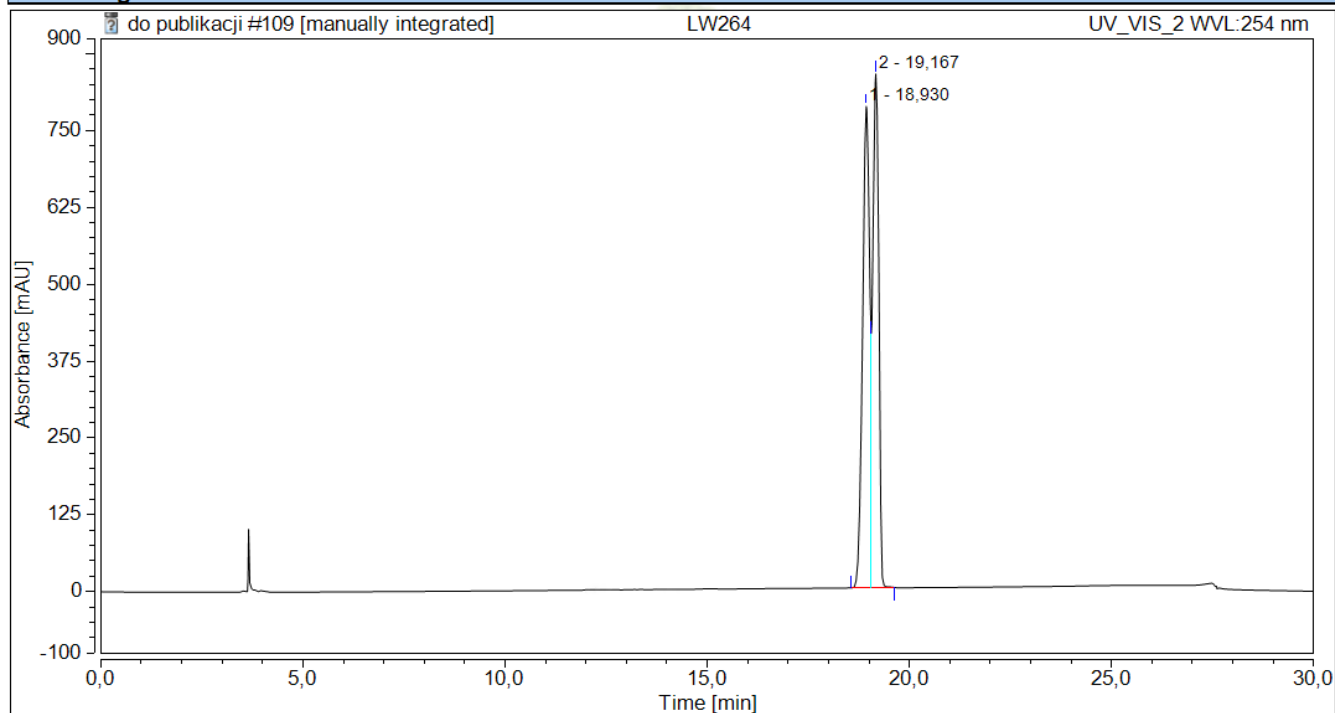

**Integration Results**

| No.           | Peak Name | Retention Time<br>min | Area<br>mAU*min | Height<br>mAU   | Relative Area<br>% | Relative Height<br>% | Amount<br>n.a. |
|---------------|-----------|-----------------------|-----------------|-----------------|--------------------|----------------------|----------------|
| 1             |           | 18,930                | 157,219         | 783,143         | 52,23              | 48,37                | n.a.           |
| 2             |           | 19,167                | 143,785         | 835,823         | 47,77              | 51,63                | n.a.           |
| <b>Total:</b> |           |                       | <b>301,004</b>  | <b>1618,966</b> | <b>100,00</b>      | <b>100,00</b>        |                |

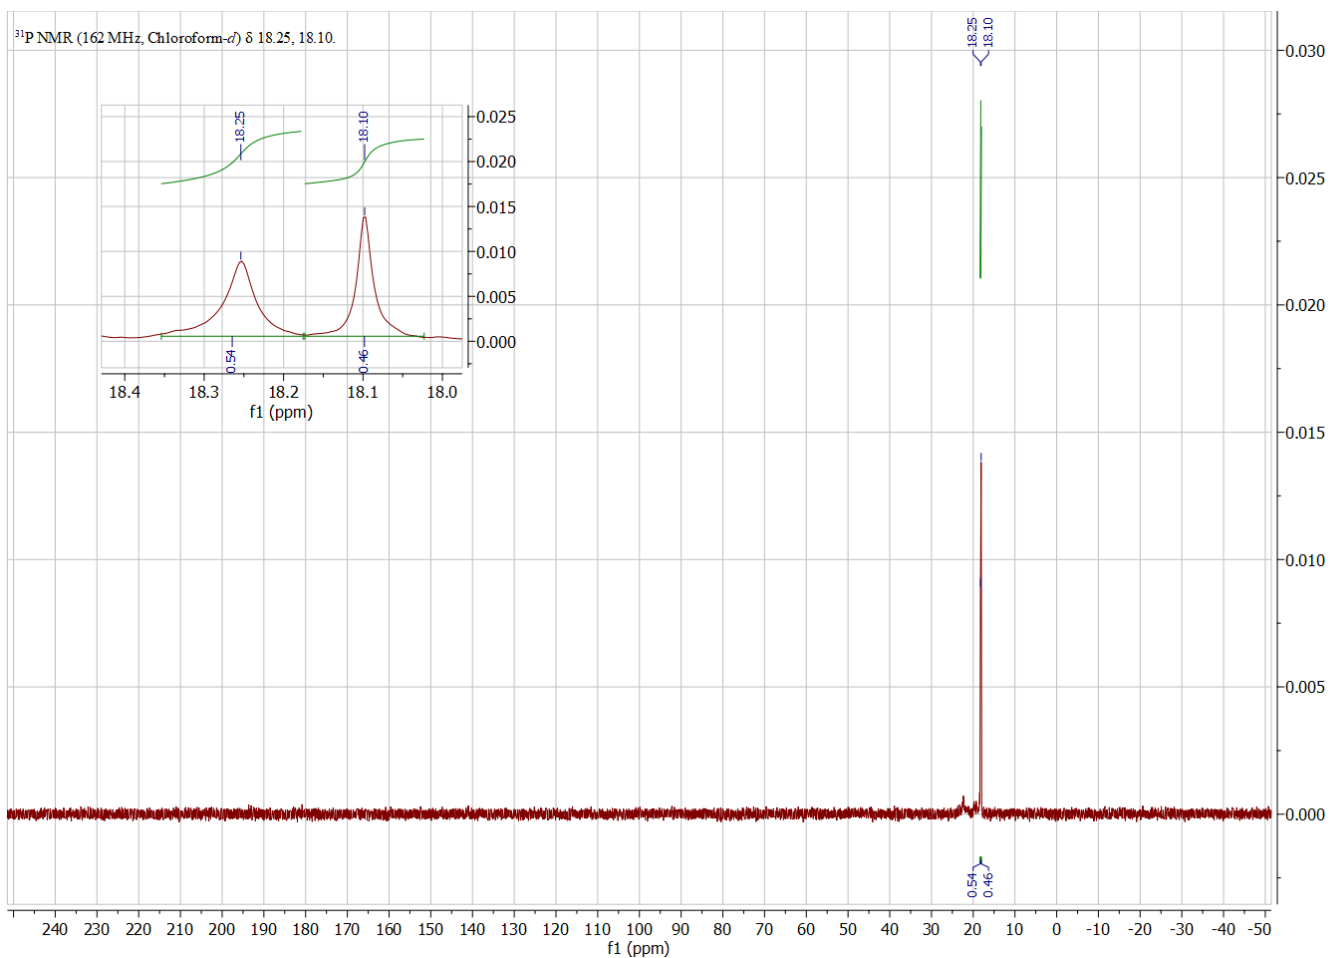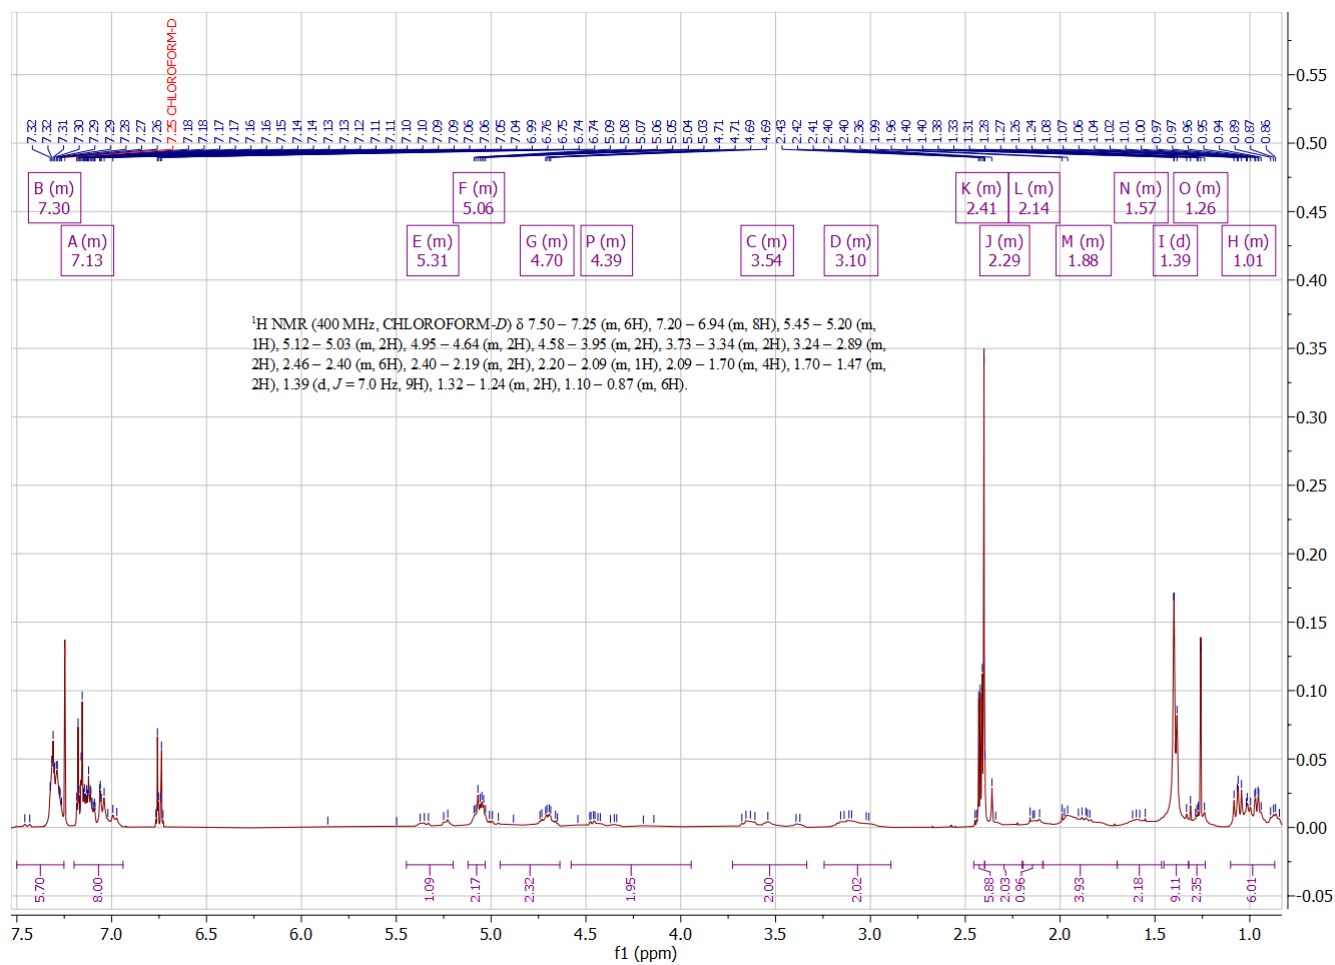

**(110) Boc-D-Lys(Z)-L-Pro-Val<sup>P</sup>(OPh-4-SCH<sub>3</sub>)<sub>2</sub>**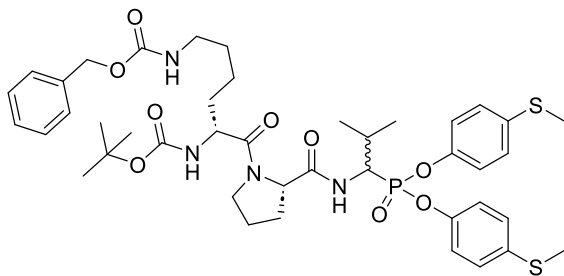

**Name:** benzyl *tert*-butyl ((5*R*)-6-((2*S*)-2-((1-(bis(4-(methylthio)phenoxy)phosphoryl)-2-methylpropyl)carbamoyl)pyrrolidin-1-yl)-6-oxohexane-1,5-diyl)dicarbamate

<sup>31</sup>P NMR (162 MHz, Chloroform-*d*) δ 18.48 (s, 66%), 18.20 (s, 34%).

<sup>1</sup>H NMR (400 MHz, Chloroform-*d*) δ 7.52 (dd, *J* = 44.3, 10.3 Hz, 1H, NH), 7.38 – 7.26 (m, 5H, 5xArH), 7.22 – 7.10 (m, 6H, 6xArH), 7.10 – 7.00 (m, 2H, 2xArH), 5.35 (dd, *J* = 24.7, 8.2 Hz, 1H, NH), 5.17 – 5.04 (m, 2H, CH<sub>2</sub>), 4.93 – 4.85 (m, 1H, NH), 4.73 – 4.62 (m, 1H, CHP), 4.64 – 4.47 (m, 1H, CH), 4.49 – 4.32 (m, 1H, CH), 3.85 – 3.65 (m, 1H, 0.5xCH<sub>2</sub>), 3.52 – 3.36 (m, 1H, 0.5xCH<sub>2</sub>), 3.22 – 3.12 (m, 2H, CH<sub>2</sub>), 2.43 (d, *J* = 3.1 Hz, 6H, 2xSCH<sub>3</sub>), 2.40 – 2.22 (m, 2H, 0.5xCH<sub>2</sub>, CH), 2.15 – 1.94 (m, 1H, 0.5xCH<sub>2</sub>), 1.94 – 1.75 (m, 2H, CH<sub>2</sub>), 1.75 – 1.39 (m, 6H, 3xCH<sub>2</sub>), 1.35 (d, *J* = 18.2 Hz, 9H, Boc), 1.12 – 0.93 (m, 6H, 2xCH<sub>3</sub>).

**HRMS:** C<sub>42</sub>H<sub>57</sub>N<sub>4</sub>O<sub>9</sub>PS<sub>2</sub> [M+Na]<sup>+</sup> calc. 879.3202 found 879.3180

**HPLC:** purity >99%; retention time 19.027 min

**Chromatogram**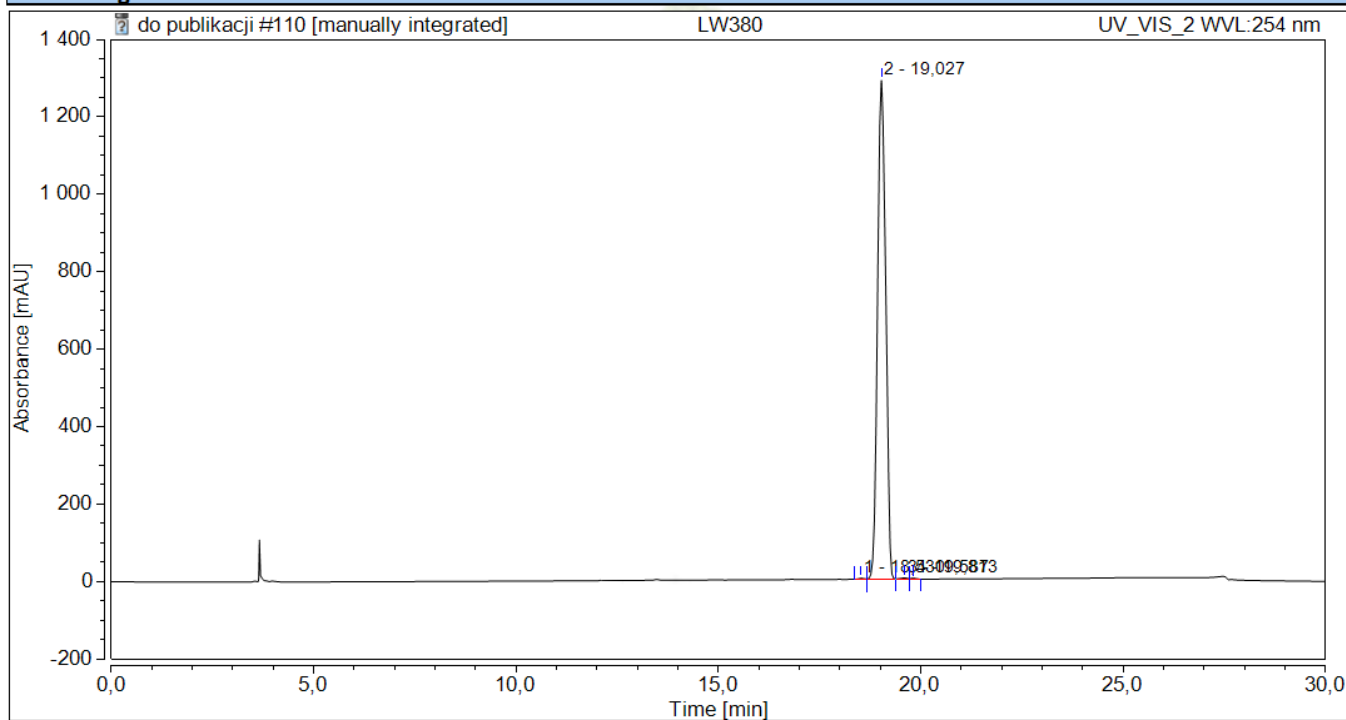**Integration Results**

| No.           | Peak Name | Retention Time<br>min | Area<br>mAU*min | Height<br>mAU   | Relative Area<br>% | Relative Height<br>% | Amount<br>n.a. |
|---------------|-----------|-----------------------|-----------------|-----------------|--------------------|----------------------|----------------|
| 1             |           | 18,530                | 0,394           | 2,408           | 0,13               | 0,19                 | n.a.           |
| 2             |           | 19,027                | 300,981         | 1288,143        | 99,53              | 99,41                | n.a.           |
| 3             |           | 19,587                | 0,636           | 2,927           | 0,21               | 0,23                 | n.a.           |
| 4             |           | 19,813                | 0,382           | 2,265           | 0,13               | 0,17                 | n.a.           |
| <b>Total:</b> |           |                       | <b>302,392</b>  | <b>1295,743</b> | <b>100,00</b>      | <b>100,00</b>        |                |

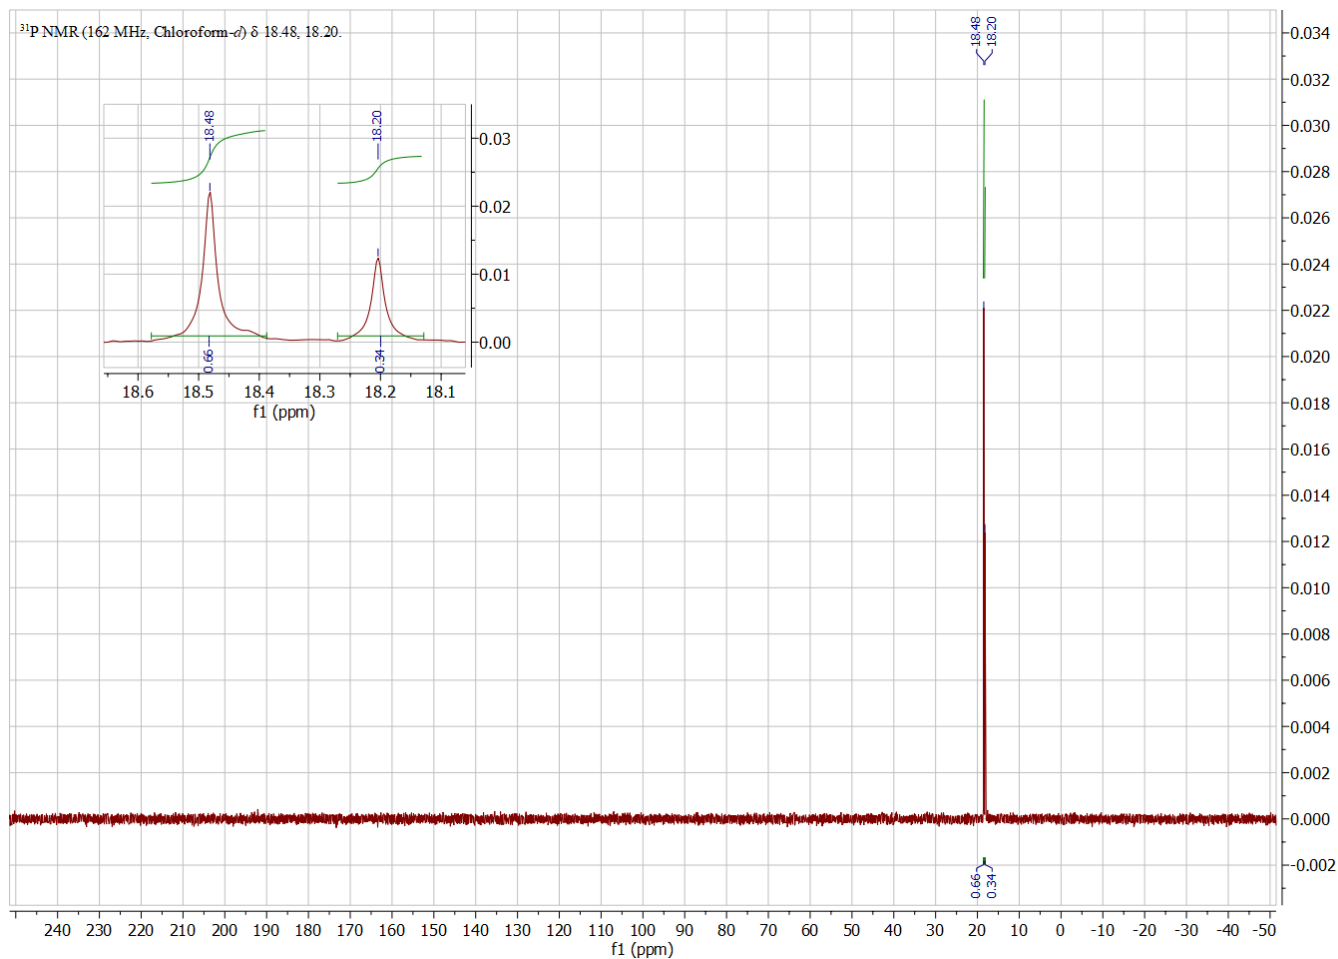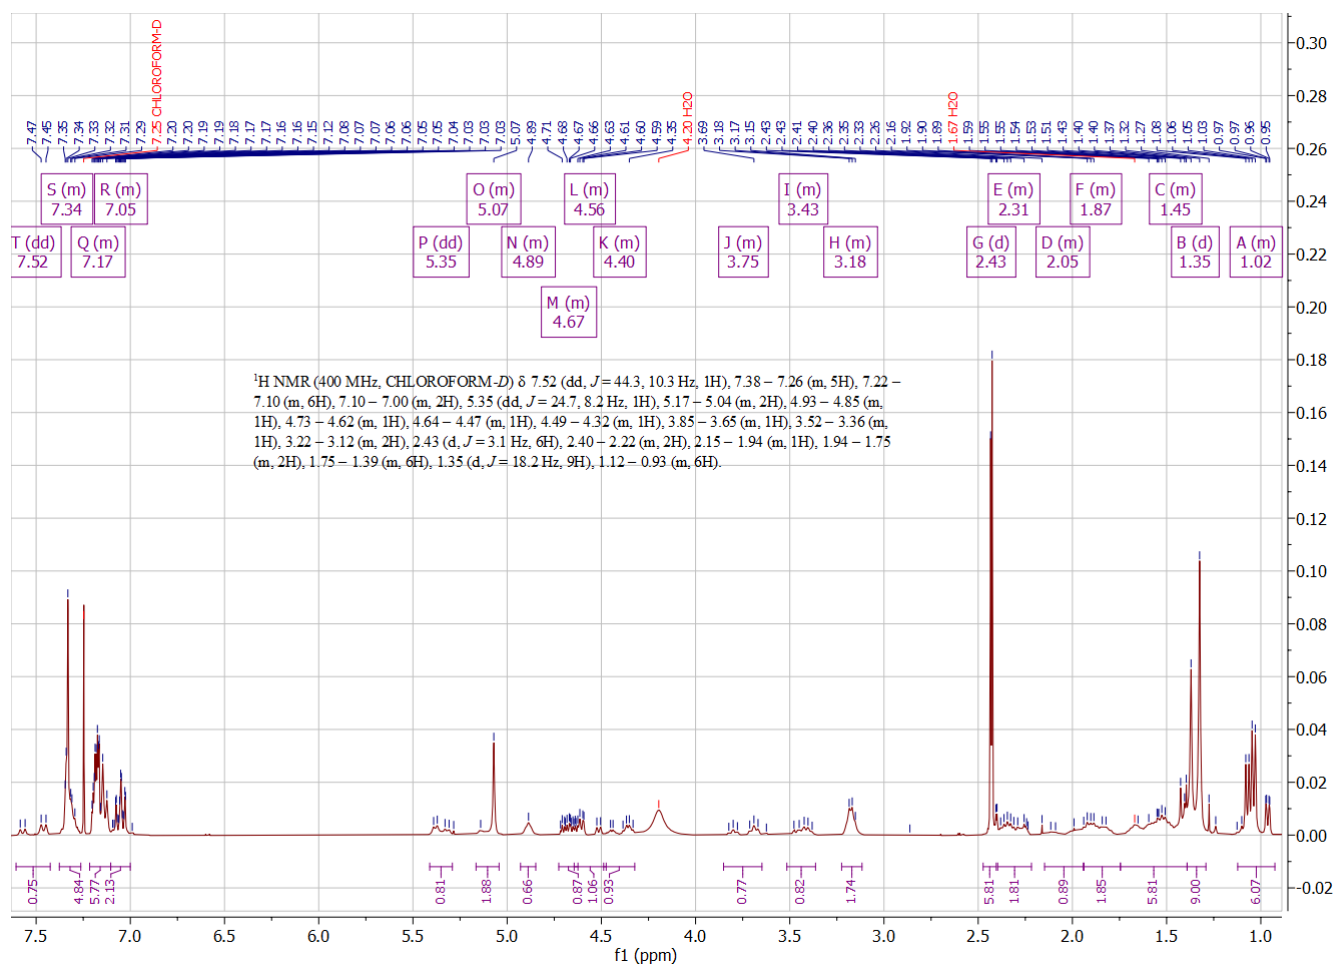

**(111) Hm-L-Met(O<sub>2</sub>)-L-Pro- Val<sup>P</sup>(OPh-4-SCH<sub>3</sub>)<sub>2</sub>**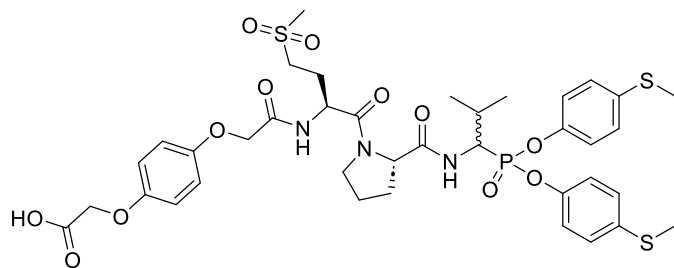

**Name:** 2-(4-(2-(((2S)-1-((2S)-2-((1-(bis(4-(methylthio)phenoxy)phosphoryl)-2-methylpropyl)carbamoyl)pyrrolidin-1-yl)-4-(methylsulfonyl)-1-oxobutan-2-yl)amino)-2-oxoethoxy)phenoxy)acetic acid

**<sup>31</sup>P NMR** (243 MHz, Methanol-*d*<sub>4</sub>) δ 18.45 (s, 47%), 18.20 (s, 53%).

**<sup>1</sup>H NMR** (601 MHz, MeOD) δ 7.21 – 6.60 (m, 13H, 12xArH, NH), 4.87 – 4.81 (m, 1H, NH), 4.59 – 4.34 (m, 7H, 2xCH<sub>2</sub>, CHP, 2xCH), 3.75 – 3.59 (m, 2H, CH<sub>2</sub>), 3.10 – 2.98 (m, 2H, CH<sub>2</sub>), 2.83 (d, J = 43.0 Hz, 3H, CH<sub>3</sub>), 2.39 – 2.31 (m, 6H, 2xSCH<sub>3</sub>), 2.32 – 2.15 (m, 2H, 0.5xCH<sub>2</sub>, CH), 2.13 – 2.02 (m, 2H, CH<sub>2</sub>), 2.00 – 1.65 (m, 3H, 1.5xCH<sub>2</sub>), 1.07 (dd, J = 20.3, 6.9 Hz, 3H, CH<sub>3</sub>), 1.01 (dd, J = 31.6, 6.6 Hz, 3H, CH<sub>3</sub>).

**HRMS:** C<sub>38</sub>H<sub>48</sub>N<sub>3</sub>O<sub>12</sub>PS<sub>3</sub> [M+H]<sup>+</sup> calc. 866.2216 found 866.2238

**HPLC:** purity >99%; retention time 15.450 min

**Chromatogram**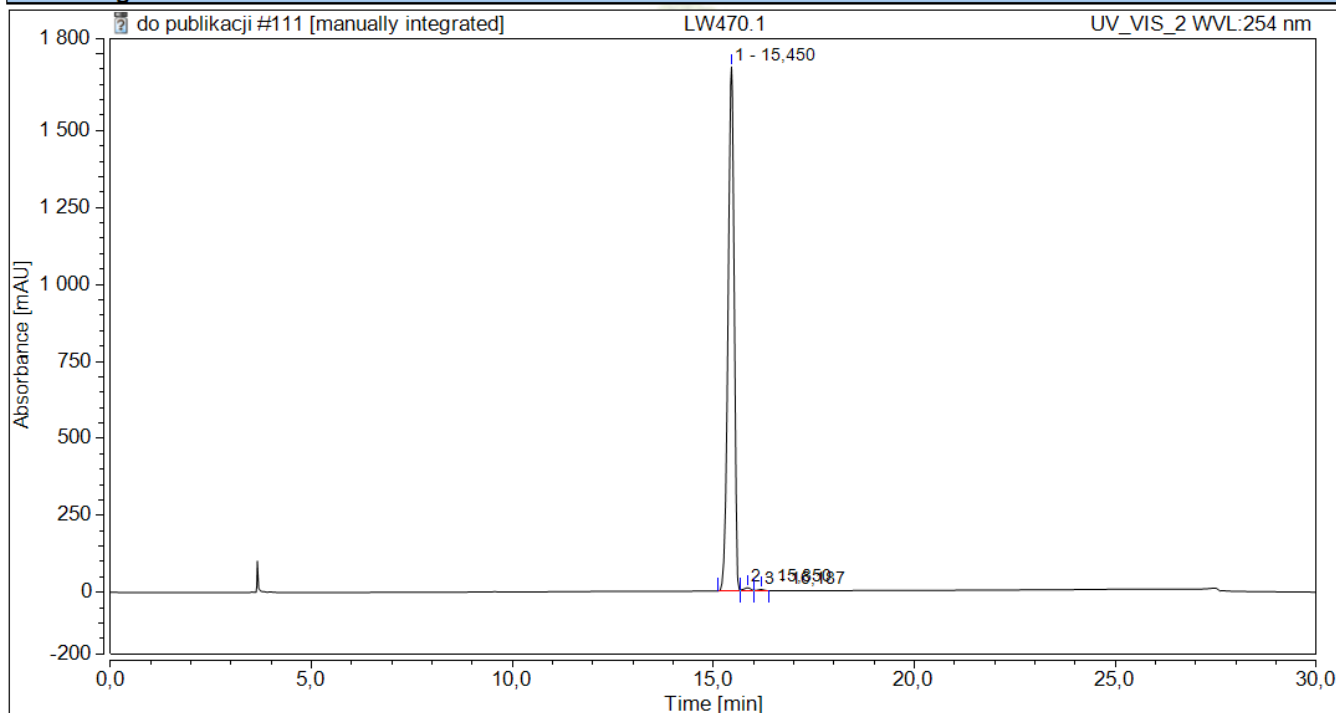**Integration Results**

| No.           | Peak Name | Retention Time<br>min | Area<br>mAU*min | Height<br>mAU   | Relative Area<br>% | Relative Height<br>% | Amount<br>n.a. |
|---------------|-----------|-----------------------|-----------------|-----------------|--------------------|----------------------|----------------|
| 1             |           | 15,450                | 299,634         | 1703,150        | 99,08              | 99,17                | n.a.           |
| 2             |           | 15,850                | 2,051           | 10,168          | 0,68               | 0,59                 | n.a.           |
| 3             |           | 16,187                | 0,738           | 4,025           | 0,24               | 0,23                 | n.a.           |
| <b>Total:</b> |           |                       | <b>302,423</b>  | <b>1717,343</b> | <b>100,00</b>      | <b>100,00</b>        |                |



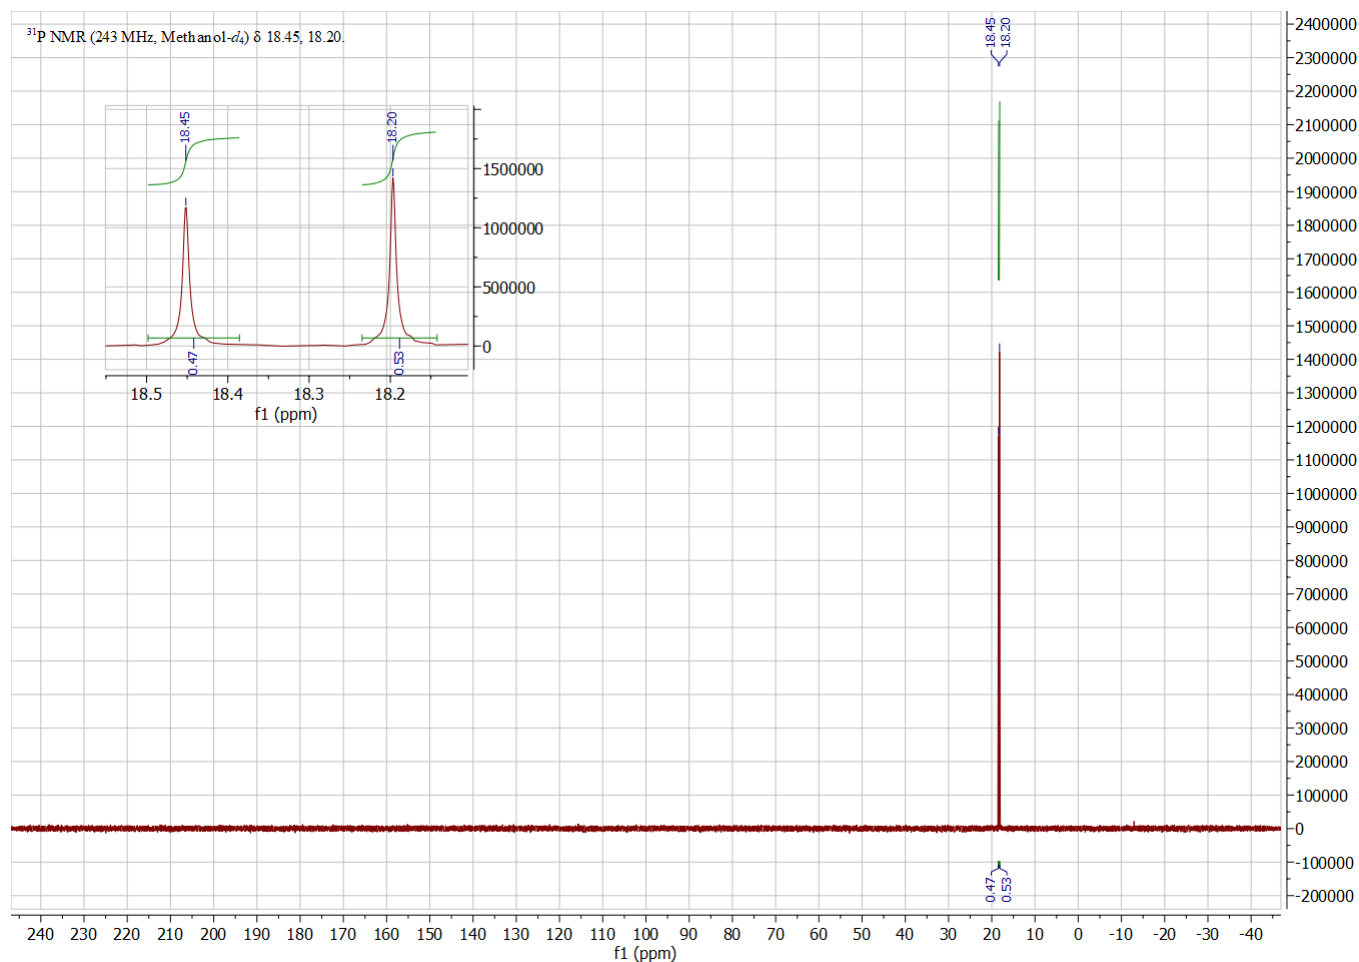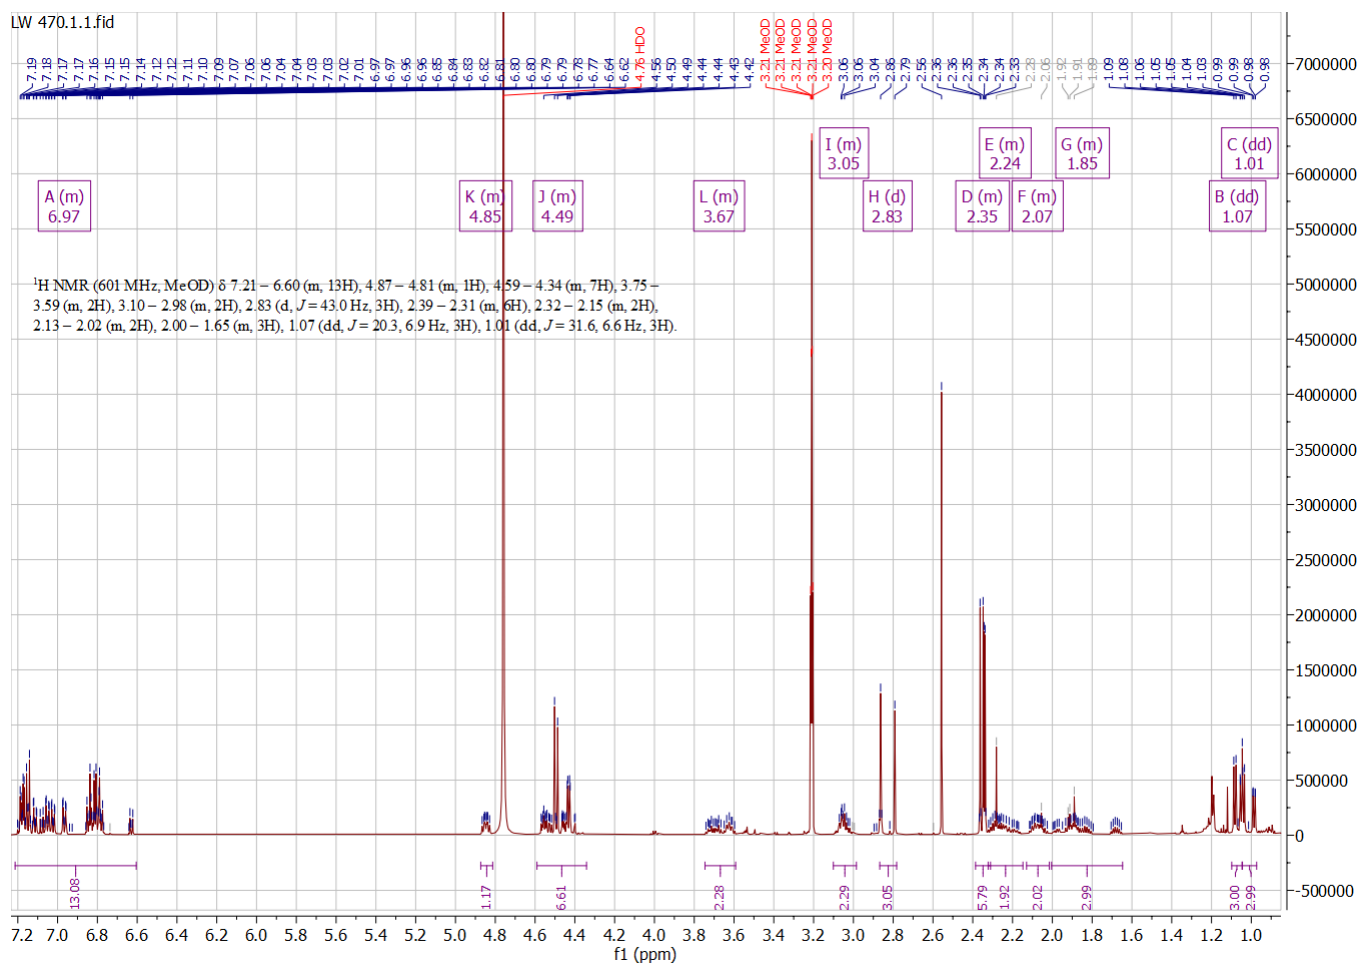

**(112) Hm-L-Met(O<sub>2</sub>)-L-Pro-D-Val<sup>P</sup>(OPh-4-SCH<sub>3</sub>)<sub>2</sub>**

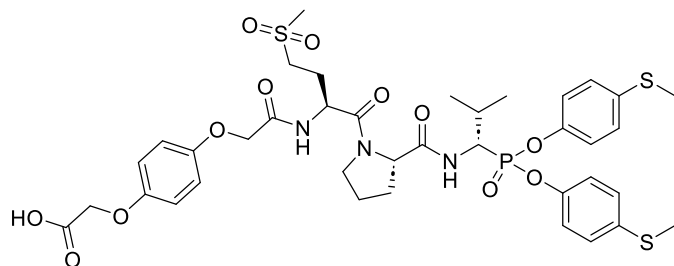

**Name:** 2-(4-(2-(((S)-1-((S)-2-(((S)-1-(bis(4-(methylthio)phenoxy)phosphoryl)-2-methylpropyl)carbamoyl)pyrrolidin-1-yl)-4-(methylsulfonyl)-1-oxobutan-2-yl)amino)-2-oxoethoxy)phenoxy)acetic acid

**<sup>31</sup>P NMR** (243 MHz, MeOD) δ 18.45 (s).

**<sup>1</sup>H NMR** (601 MHz, MeOD) δ 7.21 – 6.61 (m, 13H, 12xArH, NH), 4.85 (dd, J = 7.6, 5.5 Hz, 1H, NH), 4.61 – 4.36 (m, 7H, 2xCH<sub>2</sub>, CHP, 2xCH), 3.75 – 3.69 (m, 1H, 0.5xCH<sub>2</sub>), 3.66 – 3.60 (m, 1H, 0.5xCH<sub>2</sub>), 3.09 – 2.99 (m, 2H, CH<sub>2</sub>), 2.79 (s, 3H, CH<sub>3</sub>), 2.34 (d, J = 3.0 Hz, 6H, 2xSCH<sub>3</sub>), 2.32 – 2.18 (m, 2H, 0.5xCH<sub>2</sub>, CH), 2.17 – 2.03 (m, 2H, CH<sub>2</sub>), 2.03 – 1.80 (m, 3H, 1.5xCH<sub>2</sub>), 1.04 (d, J = 6.8 Hz, 3H, CH<sub>3</sub>), 0.99 (d, J = 6.8 Hz, 3H, CH<sub>3</sub>).

**HRMS:** C<sub>38</sub>H<sub>48</sub>N<sub>3</sub>O<sub>12</sub>PS<sub>3</sub> [M+H]<sup>+</sup> calc. 866.2216 found 866.2233

**HPLC:** purity >99%; retention time 15.407 min

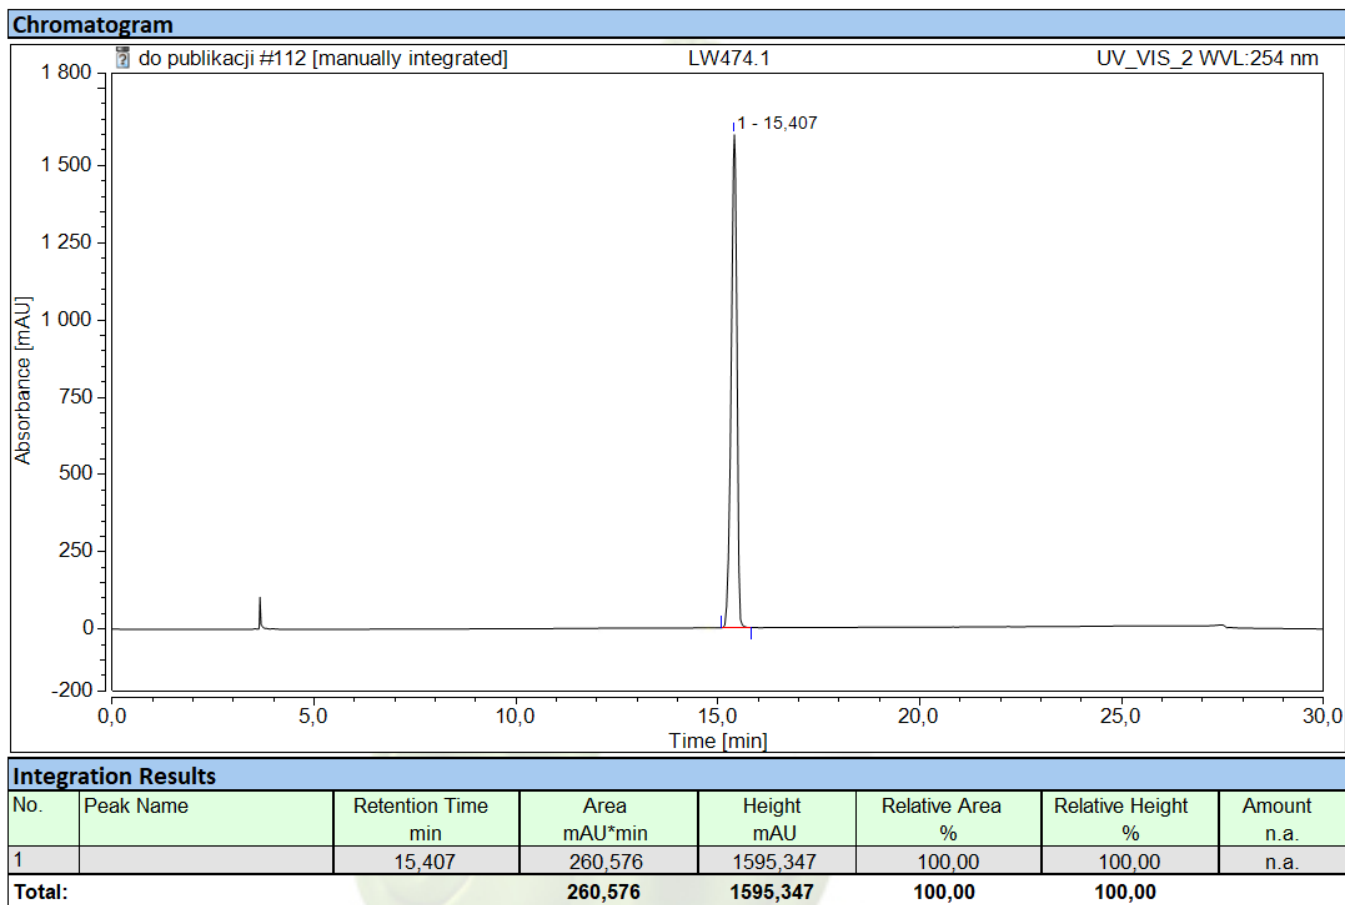

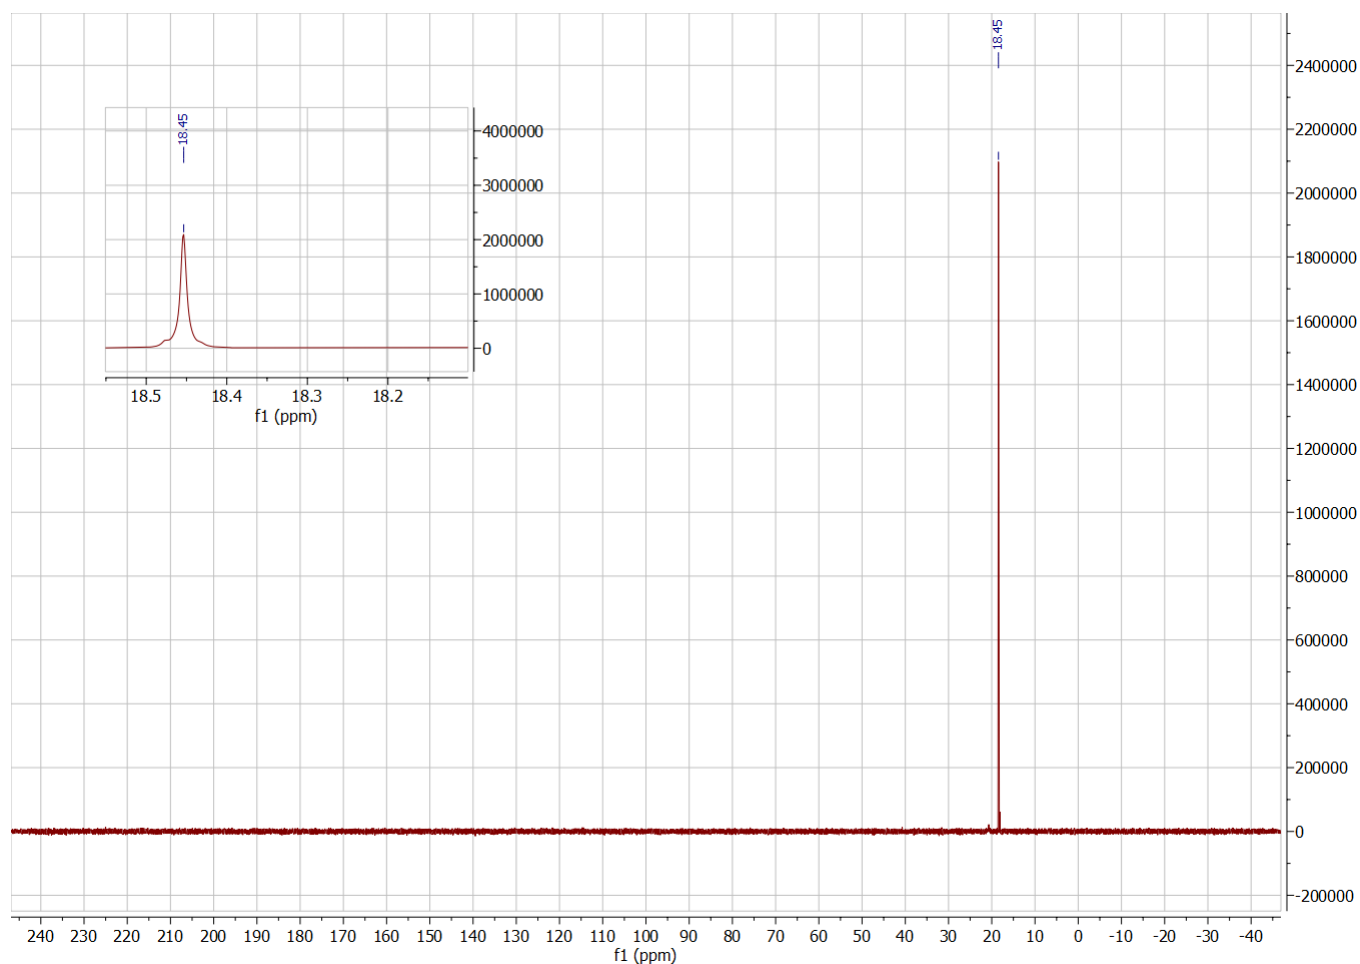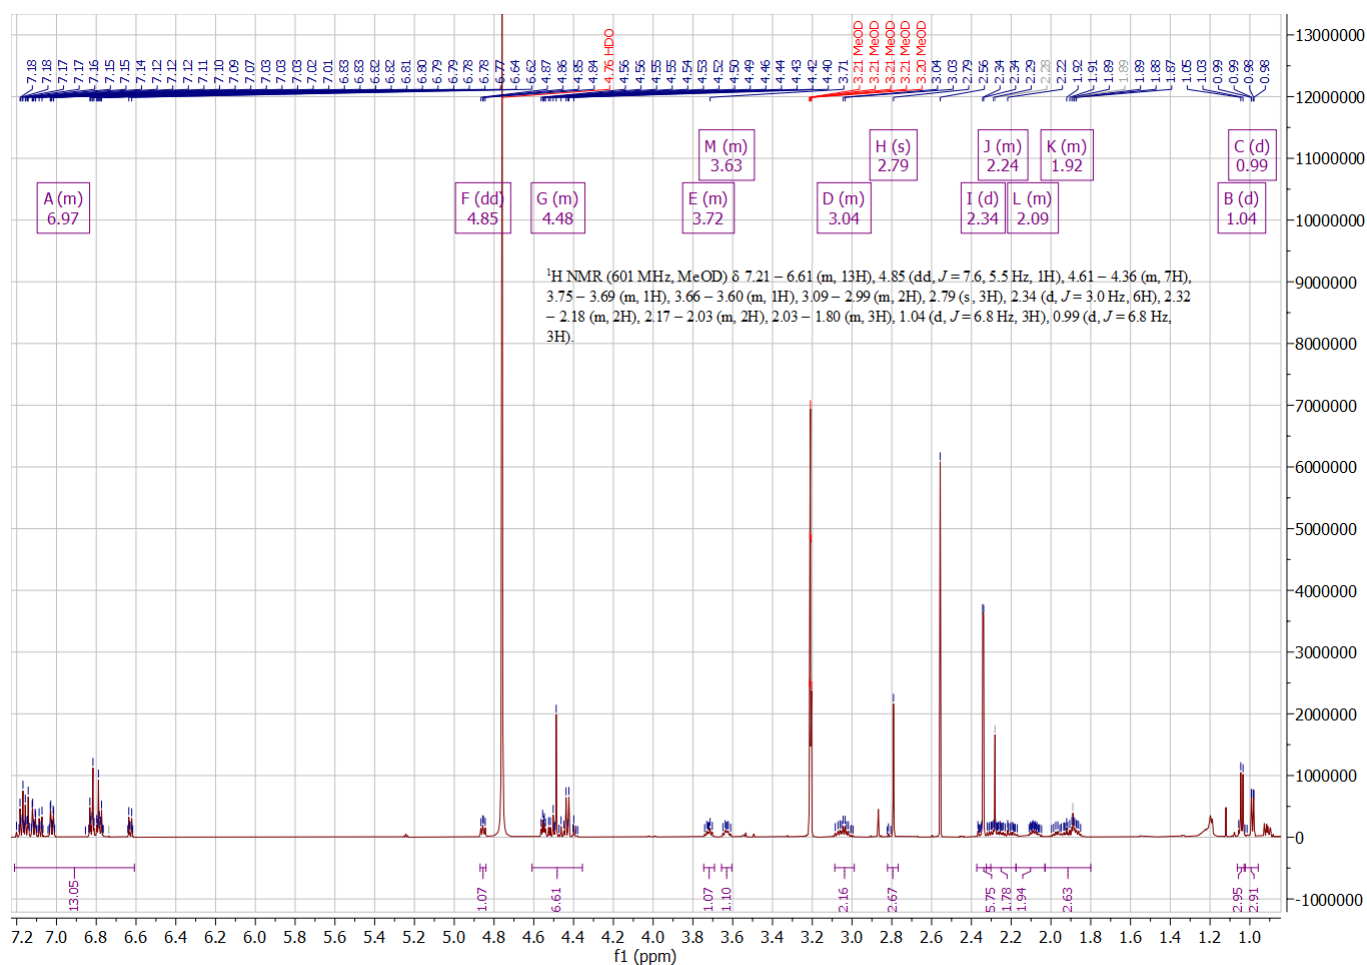

**(113) Hm-L-Met(O<sub>2</sub>)-L-Pro-L-Val<sup>P</sup>(OPh-4-SCH<sub>3</sub>)<sub>2</sub>**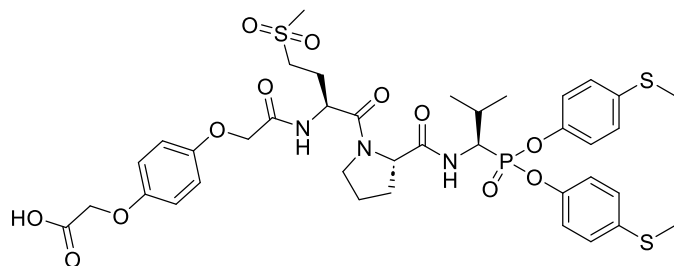

**Name:** 2-(4-(2-(((S)-1-((S)-2-(((R)-1-(bis(4-(methylthio)phenoxy)phosphoryl)-2-methylpropyl)carbamoyl)pyrrolidin-1-yl)-4-(methylsulfonyl)-1-oxobutan-2-yl)amino)-2-oxoethoxy)phenoxy)acetic acid

**<sup>31</sup>P NMR** (243 MHz, MeOD) δ 18.20 (s).

**<sup>1</sup>H NMR** (601 MHz, MeOD) δ 7.24 – 6.73 (m, 13H, 12xArH, NH), 4.85 – 4.82 (m, 1H, NH), 4.60 – 4.35 (m, 7H, 2xCH<sub>2</sub>, CHP, 2xCH), 3.71 – 3.59 (m, 2H, CH<sub>2</sub>), 3.06 (t, J = 8.0 Hz, 2H, CH<sub>2</sub>), 2.86 (s, 3H, CH<sub>3</sub>), 2.36 (d, J = 9.1 Hz, 6H, 2xSCH<sub>3</sub>), 2.31 – 2.22 (m, 2H, 0.5xCH<sub>2</sub>, CH), 2.12 – 2.02 (m, 2H, CH<sub>2</sub>), 1.94 – 1.80 (m, 2H, CH<sub>2</sub>), 1.72 – 1.64 (m, 1H, 0.5xCH<sub>2</sub>), 1.08 (d, J = 6.8 Hz, 3H, CH<sub>3</sub>), 1.05 (d, J = 6.8 Hz, 3H, CH<sub>3</sub>).

**HRMS:** C<sub>38</sub>H<sub>48</sub>N<sub>3</sub>O<sub>12</sub>PS<sub>3</sub> [M+H]<sup>+</sup> calc. 866.2216 found 866.2238

**HPLC:** purity >99%; retention time 15.480 min

**Chromatogram**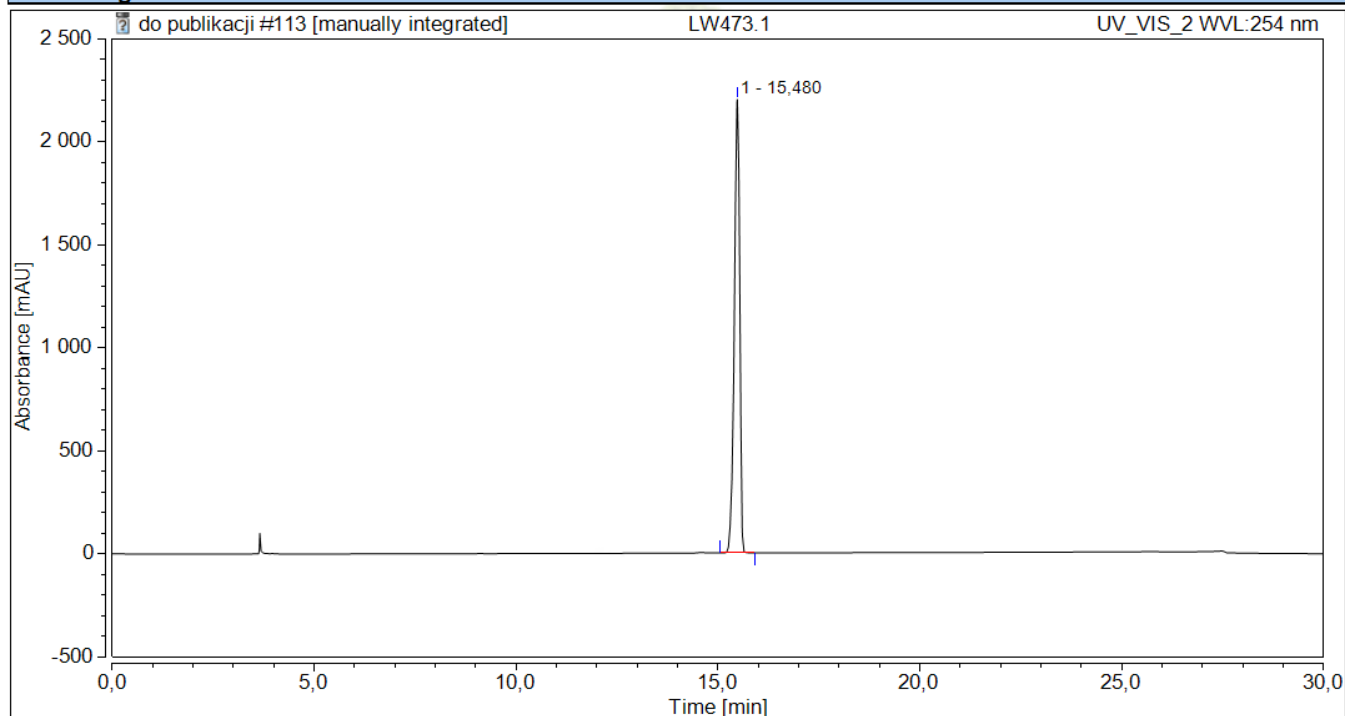**Integration Results**

| No.           | Peak Name | Retention Time<br>min | Area<br>mAU*min | Height<br>mAU   | Relative Area<br>% | Relative Height<br>% | Amount<br>n.a. |
|---------------|-----------|-----------------------|-----------------|-----------------|--------------------|----------------------|----------------|
| 1             |           | 15,480                | 341,486         | 2200,731        | 100,00             | 100,00               | n.a.           |
| <b>Total:</b> |           |                       | <b>341,486</b>  | <b>2200,731</b> | <b>100,00</b>      | <b>100,00</b>        |                |

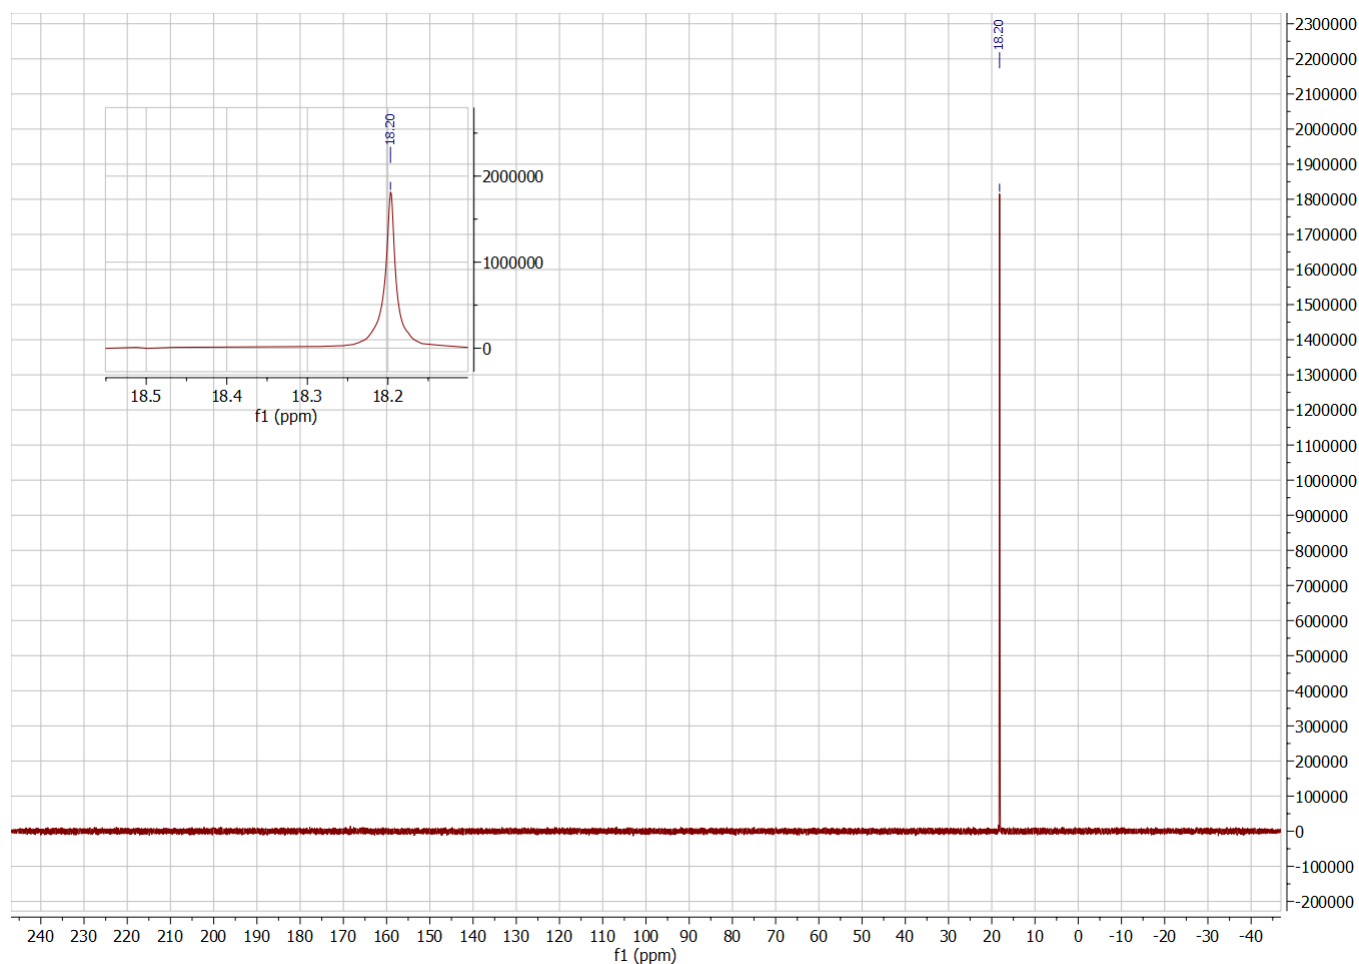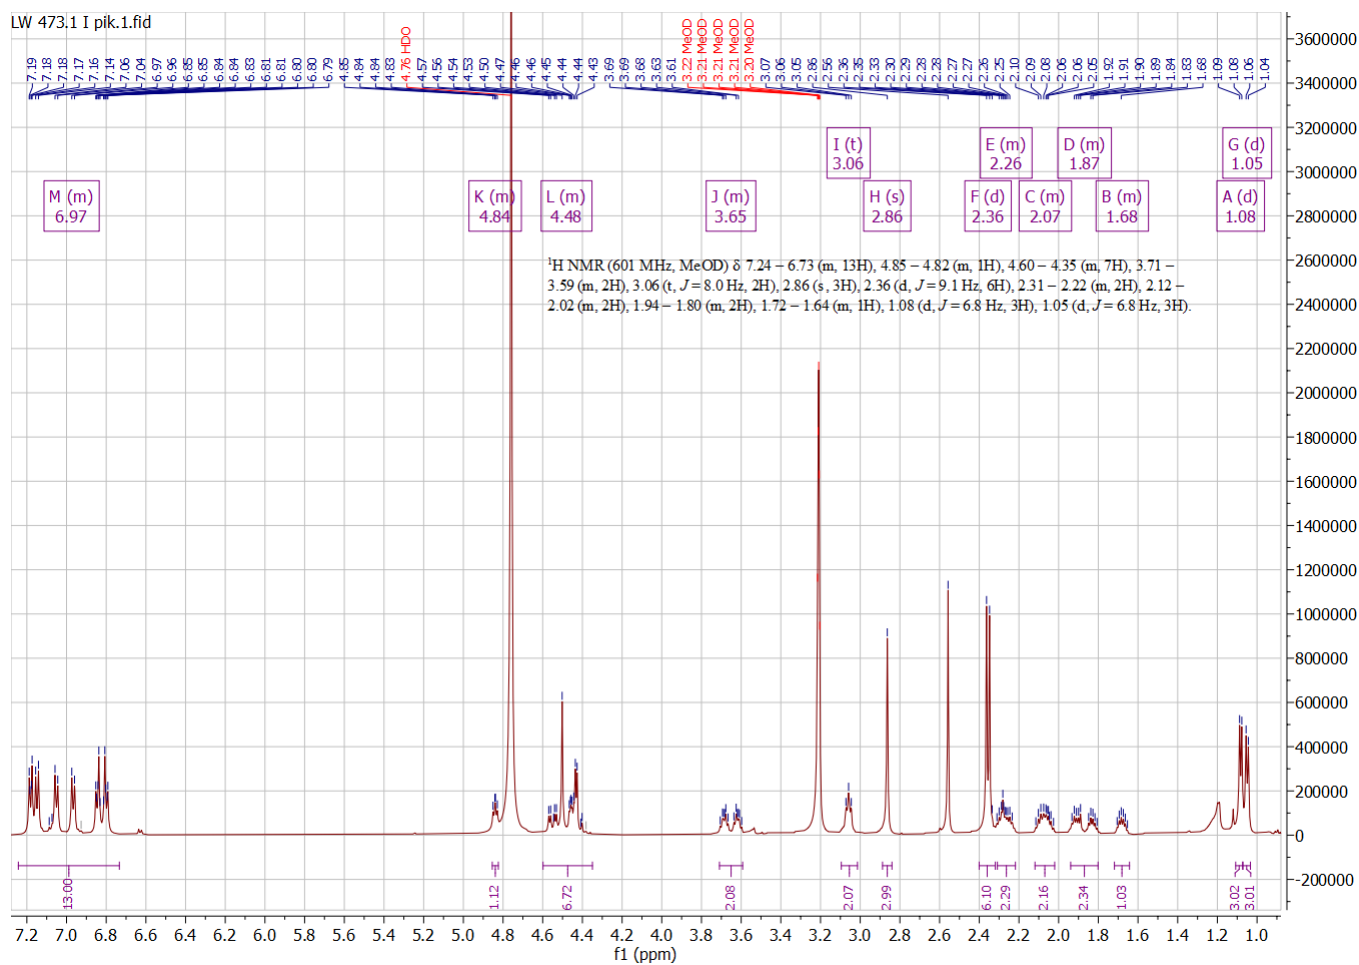

Supplement: s1 [file s1]
